# Supplementary material for: Genotyping Analysis by RAD-Seq Reads Is Useful to Assess the Genetic Identity and Relationships of Breeding Lines in Lavender Species Aimed at Managing Plant Variety Protection
Source: MDPI journal article supplement (doi:10.3390/genes12111656), 2021-10-21

**Supplementary Figure S5:** Principal Coordinate Analysis (PCoA) of the genetic similarity calculated on the *Lavandula* reads matching the *S. indicum* exome

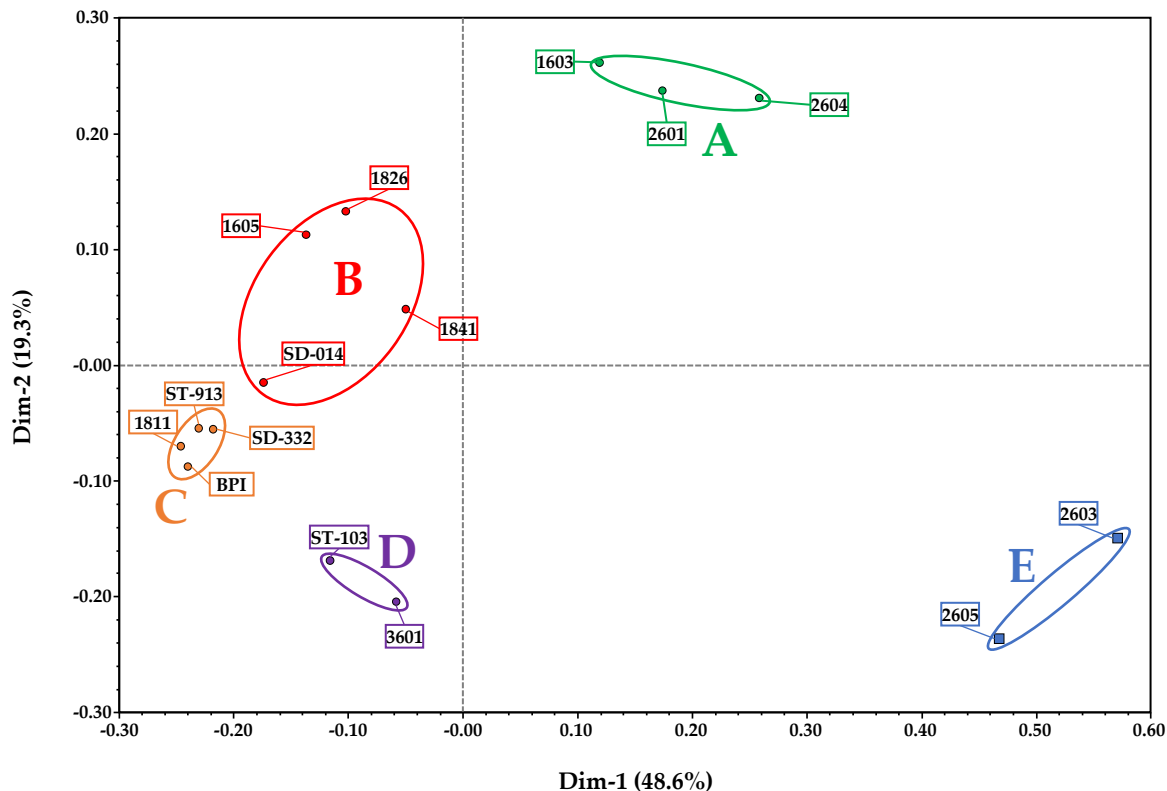

Supplement: s1 [file s1]
