# Supplementary material for: Genotyping Analysis by RAD-Seq Reads Is Useful to Assess the Genetic Identity and Relationships of Breeding Lines in Lavender Species Aimed at Managing Plant Variety Protection
Source: MDPI journal article supplement (doi:10.3390/genes12111656), 2021-10-21

**Supplementary Figure S7:** Neighbour Joining tree based on Geneious software plug-in “multiple alignment” of ITS nuclear region of the 15 *Lavandula* individuals

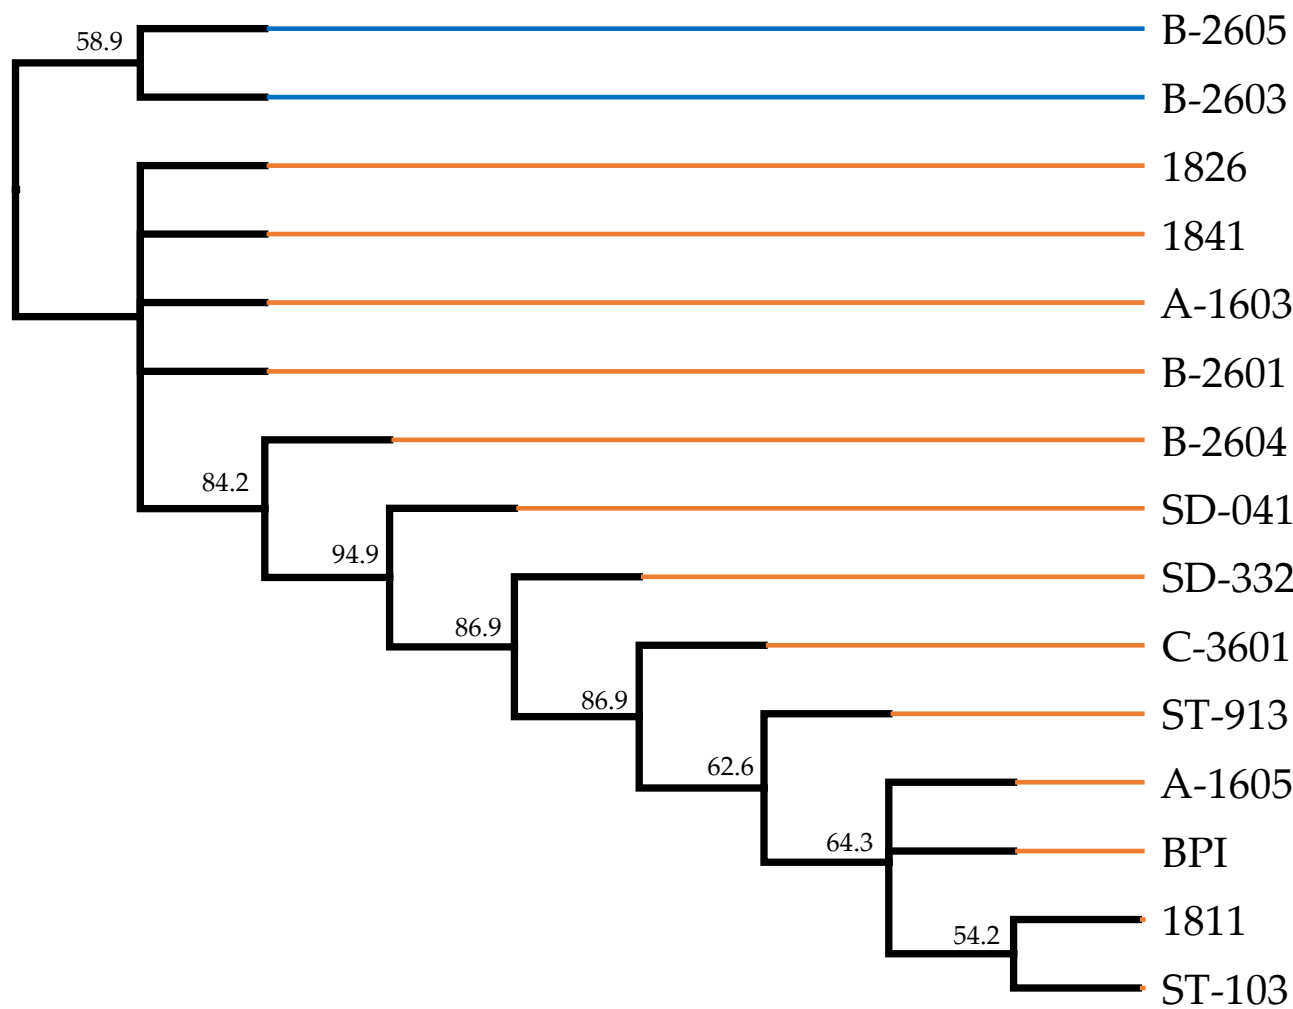

Supplement: s1 [file s1]
