# Supplementary material for: Genotyping Analysis by RAD-Seq Reads Is Useful to Assess the Genetic Identity and Relationships of Breeding Lines in Lavender Species Aimed at Managing Plant Variety Protection
Source: MDPI journal article supplement (doi:10.3390/genes12111656), 2021-10-21
Supplement: s1 [file s1]

**Supplementary Figure S2:** (a) Genetic Similarity matrix of 15 *Lavandula* individuals based the BLASTN analysis against *S. splendens* exome, and relative observed homozygosity (Obs. Ho) and heterozygosity (Obs. He). (b) Average genetic similarity of Clusters identified through the construction of the UPGMA dendro-gram, and average observed homozygosity (Avg. Obs. Ho)

(a)

| Obs. He |           |        | Genetic similarity (GS) |        |        |           |        |        |        |           |        |        |        |           |        |           |        |  |
|---------|-----------|--------|-------------------------|--------|--------|-----------|--------|--------|--------|-----------|--------|--------|--------|-----------|--------|-----------|--------|--|
| 32.3%   | Cluster A | 1603   | 100.0%                  |        |        |           |        |        |        |           |        |        |        |           |        |           |        |  |
| 39.3%   |           | 2601   | 82.5%                   | 100.0% |        |           |        |        |        |           |        |        |        |           |        |           |        |  |
| 25.4%   |           | 2604   | 79.1%                   | 77.0%  | 100.0% |           |        |        |        |           |        |        |        |           |        |           |        |  |
| 22.2%   | Cluster B | 1605   | 81.0%                   | 78.5%  | 74.7%  | 100.0%    |        |        |        |           |        |        |        |           |        |           |        |  |
| 21.6%   |           | 1841   | 79.3%                   | 77.3%  | 72.5%  | 86.8%     | 100.0% |        |        |           |        |        |        |           |        |           |        |  |
| 21.4%   |           | 1826   | 80.7%                   | 78.0%  | 75.6%  | 87.1%     | 87.4%  | 100.0% |        |           |        |        |        |           |        |           |        |  |
| 13.9%   |           | SD-014 | 77.6%                   | 75.0%  | 71.7%  | 88.6%     | 84.5%  | 83.7%  | 100.0% |           |        |        |        |           |        |           |        |  |
| 10.2%   | Cluster C | BPI    | 75.9%                   | 74.0%  | 69.8%  | 83.8%     | 80.5%  | 84.4%  | 85.3%  | 100.0%    |        |        |        |           |        |           |        |  |
| 14.8%   |           | ST-913 | 76.2%                   | 75.4%  | 71.6%  | 86.4%     | 81.8%  | 87.0%  | 84.8%  | 94.1%     | 100.0% |        |        |           |        |           |        |  |
| 16.4%   |           | SD-332 | 77.0%                   | 75.8%  | 71.9%  | 84.3%     | 80.3%  | 85.3%  | 86.4%  | 94.3%     | 93.9%  | 100.0% |        |           |        |           |        |  |
| 10.8%   |           | 1811   | 76.7%                   | 74.0%  | 69.5%  | 86.5%     | 85.8%  | 86.0%  | 87.2%  | 90.4%     | 92.4%  | 90.0%  | 100.0% |           |        |           |        |  |
| 21.8%   | Cluster D | ST-103 | 77.0%                   | 74.2%  | 70.8%  | 82.1%     | 81.0%  | 78.7%  | 83.4%  | 83.7%     | 83.1%  | 83.1%  | 83.3%  | 100.0%    |        |           |        |  |
| 23.0%   |           | 3601   | 74.3%                   | 72.4%  | 69.7%  | 79.4%     | 78.1%  | 76.2%  | 80.8%  | 77.8%     | 78.5%  | 78.5%  | 81.5%  | 87.2%     | 100.0% |           |        |  |
| 13.1%   | Cluster E | 2603   | 66.1%                   | 66.9%  | 68.2%  | 58.9%     | 62.3%  | 60.1%  | 58.1%  | 56.8%     | 57.1%  | 57.0%  | 55.5%  | 58.2%     | 57.3%  | 100.0%    |        |  |
| 28.9%   |           | 2605   | 68.5%                   | 69.8%  | 70.2%  | 64.1%     | 68.4%  | 65.1%  | 62.5%  | 60.7%     | 62.4%  | 62.1%  | 61.7%  | 65.8%     | 66.3%  | 74.2%     | 100.0% |  |
|         |           |        | 1603                    | 2601   | 2604   | 1605      | SD-014 | 1841   | 1826   | BPI       | ST-913 | SD-332 | 1811   | ST-103    | 3601   | 2603      | 2605   |  |
|         |           |        | Cluster A               |        |        | Cluster B |        |        |        | Cluster C |        |        |        | Cluster D |        | Cluster E |        |  |

(b)

| Obs. Ho      | Sample    | Avg. Genetic similarity |              |              |              |              |              |
|--------------|-----------|-------------------------|--------------|--------------|--------------|--------------|--------------|
| 67.7% ± 4.0% | Cluster A | 79.5% ± 1.6%            |              |              |              |              |              |
| 80.2% ± 2.0% | Cluster B | 76.8% ± 0.9%            | 86.4% ± 0.8% |              |              |              |              |
| 86.9% ± 1.5% | Cluster C | 74.0% ± 0.8%            | 84.7% ± 0.5% | 92.5% ± 0.8% |              |              |              |
| 77.6% ± 0.4% | Cluster D | 73.1% ± 1.1%            | 80.0% ± 0.8% | 81.2% ± 0.9% | 87.2% ± N/A  |              |              |
| 79.0% ± 7.9% | Cluster E | 68.3% ± 0.7%            | 62.5% ± 1.2% | 59.2% ± 1.0% | 61.9% ± 2.4% | 74.2% ± N/A  |              |
| 79.0% ± 2.3% | A+B+C+D   |                         |              |              |              | 62.7% ± 0.9% | 80.7% ± 0.7% |
|              | Cluster A |                         | Cluster B    | Cluster C    | Cluster D    | Cluster E    | A+B+C+D      |
