# Supplementary material for: Genotyping Analysis by RAD-Seq Reads Is Useful to Assess the Genetic Identity and Relationships of Breeding Lines in Lavender Species Aimed at Managing Plant Variety Protection
Source: Genes (Basel). 2021 Oct 21;12(11):1656. doi: 10.3390/genes12111656 (PMC8621978; doi:10.3390/genes12111656)
Supplement: Supplementary file 1 [file genes-12-01656-s001.zip › Supplementary Table S1.xlsx]

## Sheet: Sup-Tab_CDS-S_indicum
	Supplementary Table S1: BLASTN result of the RAD-seq obtained reads against the S. indicum exome
	qaccver	saccver	pident	length	mismatch	gapopen	qstart	qend	sstart	send	evalue	bitscore	sallseqid	score	nident	positive	gaps	ppos	qframe	sframe	qseq	sseq	qlen	slen	salltitles	product
	3043	NC_026160.1 - XP_011100449.1	82.609	69	12	0	1	69	1164	1232	4.62e-13	71.6	NC_026160.1_-_XP_011100449.1	78	57	57	0	82.61	1	1	TGCAGAGCAGCAGGCGAATGCGTTTCTTCTTGTAAAGGAGTTGGAAATGAGTGTCGAGCTAAAGATGGA	TGCAGAGCAACAGGCCAATGCGTTTCTGCTGGTGAAGGAGTTTGAAATGGCAGTTGAGATTAAGATGGA	69	1431	NC_026160.1_-_XP_011100449.1 Sesamum indicum cultivar Zhongzhi No. 13 linkage group LG16, S_indicum_v1.0, whole genome shotgun sequence	anthocyanidin 3-O-glucosyltransferase 2
	3043	NC_026160.1 - XP_011100453.1	81.159	69	13	0	1	69	1164	1232	1.96e-11	67.1	NC_026160.1_-_XP_011100453.1	73	56	56	0	81.16	1	1	TGCAGAGCAGCAGGCGAATGCGTTTCTTCTTGTAAAGGAGTTGGAAATGAGTGTCGAGCTAAAGATGGA	TGCAGAGCAGCAGGCCAATGCATTCTTGCTAGTAAAGGAGTTTGAAATGGCAGTTGAGATTAAGATGGA	69	1431	NC_026160.1_-_XP_011100453.1 Sesamum indicum cultivar Zhongzhi No. 13 linkage group LG16, S_indicum_v1.0, whole genome shotgun sequence	anthocyanidin 3-O-glucosyltransferase 2-like
	6706	NC_026153.1 - XP_011090466.1	86.567	67	9	0	2	68	1037	1103	8.92e-16	81.5	NC_026153.1_-_XP_011090466.1	89	58	58	0	86.57	1	1	GCAGCATATCTCAAAAGGCTGCTGTTGCTGCTTTAGGAATGGGTTATGCAGGTGGGGAAGCAGTTGC	GCAGTATATCTCAAAAGGCAGCTGTTGCAGCTTTAGGATTGGGCTACGCAGGCGGAGAAGCAGTCGC	69	1446	NC_026153.1_-_XP_011090466.1 Sesamum indicum cultivar Zhongzhi No. 13 linkage group LG9, S_indicum_v1.0, whole genome shotgun sequence	bifunctional aspartate aminotransferase and glutamate/aspartate-prephenate aminotransferase
	7480	NC_026153.1 - XP_011089364.1	86.765	68	9	0	1	68	330	397	2.56e-16	83.3	NC_026153.1_-_XP_011089364.1	91	59	59	0	86.76	1	1	TGCAGCCGAAAAGGCTTATCCCAATTGCGAACCGGTACCATGTGAACAATTCGAAACAGCTTTTGAAG	TGCAGCCGAGAAGGCATATCCCAATTGTGAAGCAGTTCCATGTGAACAATTTGACACGGCTTTTGAAG	69	1152	NC_026153.1_-_XP_011089364.1 Sesamum indicum cultivar Zhongzhi No. 13 linkage group LG9, S_indicum_v1.0, whole genome shotgun sequence	arogenate dehydratase/prephenate dehydratase 2, chloroplastic
	7480	NC_026153.1 - XP_011089363.1	86.765	68	9	0	1	68	330	397	2.56e-16	83.3	NC_026153.1_-_XP_011089363.1	91	59	59	0	86.76	1	1	TGCAGCCGAAAAGGCTTATCCCAATTGCGAACCGGTACCATGTGAACAATTCGAAACAGCTTTTGAAG	TGCAGCCGAGAAGGCATATCCCAATTGTGAAGCAGTTCCATGTGAACAATTTGACACGGCTTTTGAAG	69	1152	NC_026153.1_-_XP_011089363.1 Sesamum indicum cultivar Zhongzhi No. 13 linkage group LG9, S_indicum_v1.0, whole genome shotgun sequence	arogenate dehydratase/prephenate dehydratase 2, chloroplastic
	7969	NC_026155.1 - XP_011094662.1	82.609	69	12	0	1	69	1732	1800	4.62e-13	71.6	NC_026155.1_-_XP_011094662.1	78	57	57	0	82.61	1	1	TGCAGCGCCACATATCCTCTGATGCAGAAACTGAGGCAAGTCCTGGTCGACCACGCGTTGAAGAACGGT	TGCAGCGCAACCTACCCGTTGATGCAGAAACTGAGGCAAGTCTTGGTGGATCATGCACTGAAAAACGGT	69	2136	NC_026155.1_-_XP_011094662.1 Sesamum indicum cultivar Zhongzhi No. 13 linkage group LG11, S_indicum_v1.0, whole genome shotgun sequence	phenylalanine ammonia-lyase
	9011	NC_026153.1 - XP_011089239.2	86.154	65	9	0	1	65	773	709	1.09e-14	77.9	NC_026153.1_-_XP_011089239.2	85	56	56	0	86.15	1	-1	TGCAGCTGCGACACCATGATCACCGCGAGACCAAACACGTGGAACATCGGCAGAACACAGAGGAA	TGCAGCTGCGAGAACATGATAACAGCGAGACCAAACACGTGAAACATAGGCAAAACACACAGAAA	69	1650	NC_026153.1_-_XP_011089239.2 Sesamum indicum cultivar Zhongzhi No. 13 linkage group LG9, S_indicum_v1.0, whole genome shotgun sequence	LOW QUALITY PROTEIN: 4-coumarate--CoA ligase-like 7
	9012	NC_026153.1 - XP_011089239.2	86.154	65	9	0	1	65	773	709	1.09e-14	77.9	NC_026153.1_-_XP_011089239.2	85	56	56	0	86.15	1	-1	TGCAGCTGCGACACCATGATCACCGCGAGACCAAACACGTGGAACATCGGCAGAACACAGAGGAA	TGCAGCTGCGAGAACATGATAACAGCGAGACCAAACACGTGAAACATAGGCAAAACACACAGAAA	69	1650	NC_026153.1_-_XP_011089239.2 Sesamum indicum cultivar Zhongzhi No. 13 linkage group LG9, S_indicum_v1.0, whole genome shotgun sequence	LOW QUALITY PROTEIN: 4-coumarate--CoA ligase-like 7
	9955	NC_026156.1 - XP_020554052.1	87.692	65	8	0	5	69	201	265	2.56e-16	82.4	NC_026156.1_-_XP_020554052.1	90	57	57	0	87.69	1	1	GGAAGAGGGAAGTTTTGATGAAGCAGTAAGAGGGTGTGATGGTGTTTTTCATGTTTCAGCTTCAA	GGAAGATGGAAGTTTCGATGAGGCAGTAATAGGCTGTGATGGTGTATTCCATGTTGCAGCTTCAA	69	1095	NC_026156.1_-_XP_020554052.1 Sesamum indicum cultivar Zhongzhi No. 13 linkage group LG12, S_indicum_v1.0, whole genome shotgun sequence	putative anthocyanidin reductase isoform X2
	9955	NC_026156.1 - XP_011095308.1	87.692	65	8	0	5	69	201	265	2.56e-16	82.4	NC_026156.1_-_XP_011095308.1	90	57	57	0	87.69	1	1	GGAAGAGGGAAGTTTTGATGAAGCAGTAAGAGGGTGTGATGGTGTTTTTCATGTTTCAGCTTCAA	GGAAGATGGAAGTTTCGATGAGGCAGTAATAGGCTGTGATGGTGTATTCCATGTTGCAGCTTCAA	69	1047	NC_026156.1_-_XP_011095308.1 Sesamum indicum cultivar Zhongzhi No. 13 linkage group LG12, S_indicum_v1.0, whole genome shotgun sequence	putative anthocyanidin reductase isoform X2
	10036	NC_026151.1 - XP_011084354.1	84.848	66	10	0	4	69	456	521	3.79e-14	75.2	NC_026151.1_-_XP_011084354.1	82	56	56	0	84.85	1	1	AGGAATATGCCTCAGGCTGCTGTGTGAATGTAGGGACATCCCTATTCTAGGTGTTTGCCTGGGACA	AGGAATATGCATTAAGCTGCTGCTTGAATGCACGGACATCCCTATTTTAGGTGTTTGCCTTGGTCA	69	2775	NC_026151.1_-_XP_011084354.1 Sesamum indicum cultivar Zhongzhi No. 13 linkage group LG7, S_indicum_v1.0, whole genome shotgun sequence	aminodeoxychorismate synthase, chloroplastic
	10947	NC_026146.1 - XP_011069886.1	85.294	68	10	0	1	68	1099	1166	3.11e-15	78.8	NC_026146.1_-_XP_011069886.1	86	58	58	0	85.29	1	1	TGCAGGCCGTTCTTCGGCGACCAGAAGCTCAACAGCAGAATGGTGCAGGATTCTTGGAAGATCGGCGT	TGCAGGCCGTTTTTCGGGGATCAGAAGCTGAACGGGAGAATGGTGGAGGAGTCCTGGAAGATTGGCGT	69	1371	NC_026146.1_-_XP_011069886.1 Sesamum indicum cultivar Zhongzhi No. 13 linkage group LG2, S_indicum_v1.0, whole genome shotgun sequence	anthocyanidin 3-O-glucosyltransferase-like
	11587	NC_026149.1 - XP_011077338.1	84.058	69	11	0	1	69	1738	1670	3.79e-14	76.1	NC_026149.1_-_XP_011077338.1	83	58	58	0	84.06	1	-1	TGCAGGGGTCGTCGATGTAAGCGAAGACGTACTCGCGATCGACGACGCGGAGGAGATCCTTCTCGCAGA	TGCAAGGGTCATCGACGTATGCAAAGACGTACTCACGGTCCACCACTCGGAGCAGATCCTTCTCGCAGA	69	2139	NC_026149.1_-_XP_011077338.1 Sesamum indicum cultivar Zhongzhi No. 13 linkage group LG5, S_indicum_v1.0, whole genome shotgun sequence	phenylalanine ammonia-lyase
	14152	NC_026147.1 - XP_020548233.1	87.879	66	8	0	3	68	1140	1205	7.32e-17	84.2	NC_026147.1_-_XP_020548233.1	92	58	58	0	87.88	1	1	CAGTGAGGCTATGGCCGGAACACGAGCTAGAGGTGGAACCAAGTCTCTTGATTTACAGATAGGACA	CAGTGAAGCTTTGGCTGCAACACGAGCTAGAGGTGGAACTCCGTCTCTGGATTTACAGATAGGACA	69	1728	NC_026147.1_-_XP_020548233.1 Sesamum indicum cultivar Zhongzhi No. 13 linkage group LG3, S_indicum_v1.0, whole genome shotgun sequence	isochorismate synthase, chloroplastic-like
	14152	NC_026147.1 - XP_020548234.1	87.879	66	8	0	3	68	1140	1205	7.32e-17	84.2	NC_026147.1_-_XP_020548234.1	92	58	58	0	87.88	1	1	CAGTGAGGCTATGGCCGGAACACGAGCTAGAGGTGGAACCAAGTCTCTTGATTTACAGATAGGACA	CAGTGAAGCTTTGGCTGCAACACGAGCTAGAGGTGGAACTCCGTCTCTGGATTTACAGATAGGACA	69	1728	NC_026147.1_-_XP_020548234.1 Sesamum indicum cultivar Zhongzhi No. 13 linkage group LG3, S_indicum_v1.0, whole genome shotgun sequence	isochorismate synthase, chloroplastic-like
	14154	NC_026147.1 - XP_020548233.1	92.424	66	5	0	3	68	1140	1205	1.16e-20	97.8	NC_026147.1_-_XP_020548233.1	107	61	61	0	92.42	1	1	CAGTGAGGCTTTGGCTGGAACACGAGCTAGAGGTGGAACTGAGTCTCTTGATTTACAGATAGGACA	CAGTGAAGCTTTGGCTGCAACACGAGCTAGAGGTGGAACTCCGTCTCTGGATTTACAGATAGGACA	69	1728	NC_026147.1_-_XP_020548233.1 Sesamum indicum cultivar Zhongzhi No. 13 linkage group LG3, S_indicum_v1.0, whole genome shotgun sequence	isochorismate synthase, chloroplastic-like
	14154	NC_026147.1 - XP_020548234.1	92.424	66	5	0	3	68	1140	1205	1.16e-20	97.8	NC_026147.1_-_XP_020548234.1	107	61	61	0	92.42	1	1	CAGTGAGGCTTTGGCTGGAACACGAGCTAGAGGTGGAACTGAGTCTCTTGATTTACAGATAGGACA	CAGTGAAGCTTTGGCTGCAACACGAGCTAGAGGTGGAACTCCGTCTCTGGATTTACAGATAGGACA	69	1728	NC_026147.1_-_XP_020548234.1 Sesamum indicum cultivar Zhongzhi No. 13 linkage group LG3, S_indicum_v1.0, whole genome shotgun sequence	isochorismate synthase, chloroplastic-like
	14685	NC_026147.1 - XP_020548233.1	89.706	68	7	0	1	68	1373	1306	4.93e-19	92.4	NC_026147.1_-_XP_020548233.1	101	61	61	0	89.71	1	-1	TGCAGTGTGCCGGTTAGTCTAGCATAAAGATGTTGAACCCGTGGAAGTTTACGTAGAACCTTGCTTGG	TGCAGTGTGCCTGTCAGTTTAGCATAAAGATGTTGAACACGTGGAAGTTTCCGTAGAGCTTTGCTTGG	69	1728	NC_026147.1_-_XP_020548233.1 Sesamum indicum cultivar Zhongzhi No. 13 linkage group LG3, S_indicum_v1.0, whole genome shotgun sequence	isochorismate synthase, chloroplastic-like
	14685	NC_026147.1 - XP_020548234.1	89.706	68	7	0	1	68	1373	1306	4.93e-19	92.4	NC_026147.1_-_XP_020548234.1	101	61	61	0	89.71	1	-1	TGCAGTGTGCCGGTTAGTCTAGCATAAAGATGTTGAACCCGTGGAAGTTTACGTAGAACCTTGCTTGG	TGCAGTGTGCCTGTCAGTTTAGCATAAAGATGTTGAACACGTGGAAGTTTCCGTAGAGCTTTGCTTGG	69	1728	NC_026147.1_-_XP_020548234.1 Sesamum indicum cultivar Zhongzhi No. 13 linkage group LG3, S_indicum_v1.0, whole genome shotgun sequence	isochorismate synthase, chloroplastic-like
	14687	NC_026147.1 - XP_020548233.1	89.855	69	7	0	1	69	1373	1305	1.41e-19	94.2	NC_026147.1_-_XP_020548233.1	103	62	62	0	89.86	1	-1	TGCAGTGTGCCTGTGAGTTTAGCATAAAGGTGTTGAACGCGTGGAAGTTTACGTAGAACCTTGTTTGGT	TGCAGTGTGCCTGTCAGTTTAGCATAAAGATGTTGAACACGTGGAAGTTTCCGTAGAGCTTTGCTTGGT	69	1728	NC_026147.1_-_XP_020548233.1 Sesamum indicum cultivar Zhongzhi No. 13 linkage group LG3, S_indicum_v1.0, whole genome shotgun sequence	isochorismate synthase, chloroplastic-like
	14687	NC_026147.1 - XP_020548234.1	89.855	69	7	0	1	69	1373	1305	1.41e-19	94.2	NC_026147.1_-_XP_020548234.1	103	62	62	0	89.86	1	-1	TGCAGTGTGCCTGTGAGTTTAGCATAAAGGTGTTGAACGCGTGGAAGTTTACGTAGAACCTTGTTTGGT	TGCAGTGTGCCTGTCAGTTTAGCATAAAGATGTTGAACACGTGGAAGTTTCCGTAGAGCTTTGCTTGGT	69	1728	NC_026147.1_-_XP_020548234.1 Sesamum indicum cultivar Zhongzhi No. 13 linkage group LG3, S_indicum_v1.0, whole genome shotgun sequence	isochorismate synthase, chloroplastic-like
	15015	NC_026147.1 - XP_020548233.1	83.333	66	11	0	3	68	1663	1728	1.61e-12	70.7	NC_026147.1_-_XP_020548233.1	77	55	55	0	83.33	1	1	CAGTTCACCAAACTGATGAAACTCGACGCACCCCTTGTGTCGATGAGGGAGAAAGTTGAACTCTAA	CAGTTCACGAAATTGATGAAACTTGAGGCCCCTCTTTTGGTGATGAGGGAGAAAATTGAACTGTAA	69	1728	NC_026147.1_-_XP_020548233.1 Sesamum indicum cultivar Zhongzhi No. 13 linkage group LG3, S_indicum_v1.0, whole genome shotgun sequence	isochorismate synthase, chloroplastic-like
	15015	NC_026147.1 - XP_020548234.1	83.333	66	11	0	3	68	1663	1728	1.61e-12	70.7	NC_026147.1_-_XP_020548234.1	77	55	55	0	83.33	1	1	CAGTTCACCAAACTGATGAAACTCGACGCACCCCTTGTGTCGATGAGGGAGAAAGTTGAACTCTAA	CAGTTCACGAAATTGATGAAACTTGAGGCCCCTCTTTTGGTGATGAGGGAGAAAATTGAACTGTAA	69	1728	NC_026147.1_-_XP_020548234.1 Sesamum indicum cultivar Zhongzhi No. 13 linkage group LG3, S_indicum_v1.0, whole genome shotgun sequence	isochorismate synthase, chloroplastic-like
	8036	NC_026146.1 - XP_011071094.1	86.957	69	9	0	1	69	406	474	7.32e-17	85.1	NC_026146.1_-_XP_011071094.1	93	60	60	0	86.96	1	1	TGCAGCGGAGGAGATCAATCACTCAGAGGCAAAGAAGGCTACGTTGATTACGATAACTTCGGCCGTCTC	TGCAGTGGAGGAGATCAGTCATTCAGAGGCAAGGAAGGTTACGCTGATTACGATAACTTTGGTCGCCTC	69	1014	NC_026146.1_-_XP_011071094.1 Sesamum indicum cultivar Zhongzhi No. 13 linkage group LG2, S_indicum_v1.0, whole genome shotgun sequence	1,4-dihydroxy-2-naphthoyl-CoA synthase, peroxisomal
	14576	NC_026156.1 - XP_011096130.1	83.077	65	11	0	1	65	924	860	5.63e-12	68.9	NC_026156.1_-_XP_011096130.1	75	54	54	0	83.08	1	-1	TGCAGTGGTGAATTGCTCTAGTTCATGCTCTGATCCATAAATGTCATAGAGGTCATCAAGTATTA	TGCAGTGGTGAATTGGTGGAGTTCATGGTTGGAGCCGTAAATGTCATAGACATCATCAATTATTA	69	1617	NC_026156.1_-_XP_011096130.1 Sesamum indicum cultivar Zhongzhi No. 13 linkage group LG12, S_indicum_v1.0, whole genome shotgun sequence	alpha-farnesene synthase
	6208	NC_026145.1 - XP_011093795.1	88.235	68	8	0	1	68	598	665	6.01e-18	87.8	NC_026145.1_-_XP_011093795.1	96	60	60	0	88.24	1	1	TGCAGCAGAGCAAGAAAATGGATTCTTGATCATGGTACTGTCAAAGCCATTCCTTCTTGGGGAAAAAC	TGCACCAGAGCAAGAAAATGGATTCTTGACCATGGCACTGTGACAGCAATACCTTCTTGGGGAAAGAC	69	2292	NC_026145.1_-_XP_011093795.1 Sesamum indicum cultivar Zhongzhi No. 13 linkage group LG1, S_indicum_v1.0, whole genome shotgun sequence	beta-amyrin synthase
	8386	NC_026145.1 - XP_011093795.1	86.957	69	9	0	1	69	1884	1816	7.32e-17	85.1	NC_026145.1_-_XP_011093795.1	93	60	60	0	86.96	1	-1	TGCAGCTAGCCCACCTAGGGCAAACCAAGTACCATAAGTGAAGCAAACACCCCAATTTCCATACCATGA	TGCTGCAAGCCCTCCAAGAGCAAACCAAGTACCGTATGTGAAGCAAACGCCCCAGTTTCCATACCATGA	69	2292	NC_026145.1_-_XP_011093795.1 Sesamum indicum cultivar Zhongzhi No. 13 linkage group LG1, S_indicum_v1.0, whole genome shotgun sequence	beta-amyrin synthase
	6208	NC_026152.1 - XP_011085901.1	88.235	68	8	0	1	68	598	665	6.01e-18	87.8	NC_026152.1_-_XP_011085901.1	96	60	60	0	88.24	1	1	TGCAGCAGAGCAAGAAAATGGATTCTTGATCATGGTACTGTCAAAGCCATTCCTTCTTGGGGAAAAAC	TGCACCAGAGCAAGAAAATGGATTCTTGACCATGGCACTGTGACAGCAATACCTTCTTGGGGAAAGAC	69	2292	NC_026152.1_-_XP_011085901.1 Sesamum indicum cultivar Zhongzhi No. 13 linkage group LG8, S_indicum_v1.0, whole genome shotgun sequence	beta-amyrin synthase-like
	8386	NC_026152.1 - XP_011085901.1	85.507	69	10	0	1	69	1884	1816	8.92e-16	80.6	NC_026152.1_-_XP_011085901.1	88	59	59	0	85.51	1	-1	TGCAGCTAGCCCACCTAGGGCAAACCAAGTACCATAAGTGAAGCAAACACCCCAATTTCCATACCATGA	TGCTGCAAGCCCTCCAAGAGCAAACCAAGTACCGTATGTGAAGCAAACGCCCCAGTTTCCGTACCATGA	69	2292	NC_026152.1_-_XP_011085901.1 Sesamum indicum cultivar Zhongzhi No. 13 linkage group LG8, S_indicum_v1.0, whole genome shotgun sequence	beta-amyrin synthase-like
	6276	NC_026156.1 - XP_011095756.1	85.965	57	8	0	1	57	1545	1601	5.63e-12	68	NC_026156.1_-_XP_011095756.1	74	49	49	0	85.96	1	1	TGCAGCAGCAACCATTTTCTCTCCAGAACTATCAGATGCACGGATGTCGTGGGCCAA	TGCTGCGGCAACCTTTTTCGCTCCTGAACTATCAGATGCCCGCATGTCATGGGCCAA	69	2370	NC_026156.1_-_XP_011095756.1 Sesamum indicum cultivar Zhongzhi No. 13 linkage group LG12, S_indicum_v1.0, whole genome shotgun sequence	ent-kaur-16-ene synthase, chloroplastic
	7199	NC_026151.1 - XP_011083784.1	83.871	62	10	0	8	69	980	919	5.63e-12	68	NC_026151.1_-_XP_011083784.1	74	52	52	0	83.87	1	-1	ACTATTGTCGTATCTGTTGATTCAATAATGTCTTCCCACAGAAGCATCAGTATTTGCTGTTC	ACTAACGTAGTATCTGATGCTTCAATAATGGCTTCCCACAGAAGCATCAATTTCTGTTGTTC	69	1536	NC_026151.1_-_XP_011083784.1 Sesamum indicum cultivar Zhongzhi No. 13 linkage group LG7, S_indicum_v1.0, whole genome shotgun sequence	ent-kaurene oxidase, chloroplastic-like
	3576	NC_026150.1 - XP_020550121.1	89.831	59	6	0	1	59	1786	1728	8.92e-16	80.6	NC_026150.1_-_XP_020550121.1	88	53	53	0	89.83	1	-1	TGCAGAGTCTGTTGTGGCTGAGCTTCAAGCAAGAGAGCAATTGCAGAGCTTCCAACCCT	TGCAGAGTCTGTTGTTGTTAAGCTTCAAGCAGGAGAGCAGTTGCAGAGCCTCCAACCCT	69	2118	NC_026150.1_-_XP_020550121.1 Sesamum indicum cultivar Zhongzhi No. 13 linkage group LG6, S_indicum_v1.0, whole genome shotgun sequence	geranylgeranyl transferase type-2 subunit alpha 1
	3576	NC_026150.1 - XP_011080035.1	89.831	59	6	0	1	59	1786	1728	8.92e-16	80.6	NC_026150.1_-_XP_011080035.1	88	53	53	0	89.83	1	-1	TGCAGAGTCTGTTGTGGCTGAGCTTCAAGCAAGAGAGCAATTGCAGAGCTTCCAACCCT	TGCAGAGTCTGTTGTTGTTAAGCTTCAAGCAGGAGAGCAGTTGCAGAGCCTCCAACCCT	69	2118	NC_026150.1_-_XP_011080035.1 Sesamum indicum cultivar Zhongzhi No. 13 linkage group LG6, S_indicum_v1.0, whole genome shotgun sequence	geranylgeranyl transferase type-2 subunit alpha 1
	10802	NC_026145.1 - XP_011092247.1	83.824	68	11	0	2	69	96	29	1.32e-13	74.3	NC_026145.1_-_XP_011092247.1	81	57	57	0	83.82	1	-1	GCAGGCAGCAGCCAGAGAGGCCAGAGATGATGAATCCAACGGCTGAGAAACATCTAGAACTGGGAGTT	GCAGGCTGCAGCCAGAGAGGACAAAGATGCTGAATGTAATGGTTGTGAAACATCTAAAACAGGGAGTT	69	987	NC_026145.1_-_XP_011092247.1 Sesamum indicum cultivar Zhongzhi No. 13 linkage group LG1, S_indicum_v1.0, whole genome shotgun sequence	gibberellin 20-oxidase-like protein
	11279	NC_026156.1 - XP_011096560.1	81.159	69	13	0	1	69	758	690	1.96e-11	67.1	NC_026156.1_-_XP_011096560.1	73	56	56	0	81.16	1	-1	TGCAGGGAATCGCCGACGTTGAAGAAAAAGGTGGTGTGATCGGACGGCACTGAGAGCCACGCGCCGTCT	TGCAAGGAATCACCAACATTGAAGAAAAAGGAGGTGTGATCAGGTGGGACTGAGACCCACGTTCCATCT	69	1011	NC_026156.1_-_XP_011096560.1 Sesamum indicum cultivar Zhongzhi No. 13 linkage group LG12, S_indicum_v1.0, whole genome shotgun sequence	gibberellin 2-beta-dioxygenase
	10014	NC_026159.1 - XP_011098626.1	84.058	69	11	0	1	69	217	285	3.79e-14	76.1	NC_026159.1_-_XP_011098626.1	83	58	58	0	84.06	1	1	TGCAGGAAGTGTCTATGCGTGCCGCCGGGGTATTATGGGAACAAAGTTGTCTGCCCTTGCTACAACAAC	TGCAGAAAGTGCCTTTGTGTGCCCCCGGGCTTTTATGGAAACAAAGCGGTTTGCCCTTGCTACAACAAC	69	321	NC_026159.1_-_XP_011098626.1 Sesamum indicum cultivar Zhongzhi No. 13 linkage group LG15, S_indicum_v1.0, whole genome shotgun sequence	gibberellin-regulated protein 4-like
	10014	NC_026147.1 - XP_011071640.1	81.159	69	13	0	1	69	214	282	1.96e-11	67.1	NC_026147.1_-_XP_011071640.1	73	56	56	0	81.16	1	1	TGCAGGAAGTGTCTATGCGTGCCGCCGGGGTATTATGGGAACAAAGTTGTCTGCCCTTGCTACAACAAC	TGCAACAAGTGCCTGTGCGTTCCCCCTGGCTACTACGGCAACAAAGCCGTCTGCCCTTGCTACAACAAC	69	318	NC_026147.1_-_XP_011071640.1 Sesamum indicum cultivar Zhongzhi No. 13 linkage group LG3, S_indicum_v1.0, whole genome shotgun sequence	gibberellin-regulated protein 4-like
	4578	NC_026151.1 - XP_011084658.1	85.965	57	8	0	6	62	236	292	5.63e-12	68	NC_026151.1_-_XP_011084658.1	74	49	49	0	85.96	1	1	ATGCATATTGGTTGATGAGAATGATTGCGTGGTTGGCCATGAATCCAAGTACAATTG	ATGCATTTTGGTTGATGAGAATGATCGAGTTGTTGGCCATGACACCAAATACAACTG	69	878	NC_026151.1_-_XP_011084658.1 Sesamum indicum cultivar Zhongzhi No. 13 linkage group LG7, S_indicum_v1.0, whole genome shotgun sequence	isopentenyl-diphosphate Delta-isomerase I
	6515	NC_026151.1 - XP_011084658.1	86.441	59	8	0	1	59	438	380	4.62e-13	71.6	NC_026151.1_-_XP_011084658.1	78	51	51	0	86.44	1	-1	TGCAGCAGGTGTTGGTCCAGACAAGGGGGAAAGTAACCTTAGTTGCAGATCGTTGCTGA	TGCAGCAGGTGTTTGTCCACACCAAAGGAAAGGTCACCTTAGTTGCAGATCGTTGCTGA	69	878	NC_026151.1_-_XP_011084658.1 Sesamum indicum cultivar Zhongzhi No. 13 linkage group LG7, S_indicum_v1.0, whole genome shotgun sequence	isopentenyl-diphosphate Delta-isomerase I
	13525	NC_026151.1 - XP_011084658.1	92.453	53	4	0	1	53	435	487	3.11e-15	78.8	NC_026151.1_-_XP_011084658.1	86	49	49	0	92.45	1	1	TGCAGTCATCCACTATATCGAGATTCTGAGCTTATTGAAGAAAATGCTCTTGG	TGCAGTCATCCTCTCTACCGGGATTCTGAGCTTATTGAAGAAAATGCTCTTGG	69	878	NC_026151.1_-_XP_011084658.1 Sesamum indicum cultivar Zhongzhi No. 13 linkage group LG7, S_indicum_v1.0, whole genome shotgun sequence	isopentenyl-diphosphate Delta-isomerase I
	13525	NC_026148.1 - XP_011077171.1	88.679	53	6	0	1	53	436	488	1.61e-12	69.8	NC_026148.1_-_XP_011077171.1	76	47	47	0	88.68	1	1	TGCAGTCATCCACTATATCGAGATTCTGAGCTTATTGAAGAAAATGCTCTTGG	TGCAGTCATCCACTGTTCCGAGATTCTGAGCTTATCGAAGAGAACGCTCTTGG	69	876	NC_026148.1_-_XP_011077171.1 Sesamum indicum cultivar Zhongzhi No. 13 linkage group LG4, S_indicum_v1.0, whole genome shotgun sequence	isopentenyl-diphosphate Delta-isomerase I
	9817	NC_026145.1 - XP_011075409.1	84.375	64	10	0	1	64	384	447	4.62e-13	71.6	NC_026145.1_-_XP_011075409.1	78	54	54	0	84.38	1	1	TGCAGGAAAGCAAATCCTGTTGACTATATTTTTGTGGATGATACCTATGTGGATAATTGCATTT	TGCTGGAAAGCAAATCCTGATGGGTATGTTTGTATGGATGATACCAGTGTGGATATTTGCATTT	69	513	NC_026145.1_-_XP_011075409.1 Sesamum indicum cultivar Zhongzhi No. 13 linkage group LG1, S_indicum_v1.0, whole genome shotgun sequence	probable NAD(P)H dehydrogenase subunit CRR3, chloroplastic
	14513	NC_026150.1 - XP_011082816.1	82.609	69	12	0	1	69	468	400	4.62e-13	71.6	NC_026150.1_-_XP_011082816.1	78	57	57	0	82.61	1	-1	TGCAGTGGCTCGTGAGACAAGAAAAACTAAAGCCGGGCGCATCCTCTTACCACCAGCTTCGAAGATTTG	TGCAGTGGCTCTTGAAACTAGAAAAACTAGAGCCGGTCTCATTCTTTTGCCACCAGCTCCAAAAATTTG	69	1266	NC_026150.1_-_XP_011082816.1 Sesamum indicum cultivar Zhongzhi No. 13 linkage group LG6, S_indicum_v1.0, whole genome shotgun sequence	probable solanesyl-diphosphate synthase 3, chloroplastic
	14513	NC_026158.1 - XP_011098150.1	81.159	69	13	0	1	69	468	400	1.96e-11	67.1	NC_026158.1_-_XP_011098150.1	73	56	56	0	81.16	1	-1	TGCAGTGGCTCGTGAGACAAGAAAAACTAAAGCCGGGCGCATCCTCTTACCACCAGCTTCGAAGATTTG	TGCAGTGGCTCTTGAAACTAGAAAAACTAACGCAGGTCTCATTCTTTTCCCCCCAGCTCCAAAGATTTG	69	1266	NC_026158.1_-_XP_011098150.1 Sesamum indicum cultivar Zhongzhi No. 13 linkage group LG14, S_indicum_v1.0, whole genome shotgun sequence	probable solanesyl-diphosphate synthase 3, chloroplastic isoform X2
	5640	NC_026151.1 - XP_020551000.1	90.741	54	5	0	16	69	1033	980	3.79e-14	76.1	NC_026151.1_-_XP_020551000.1	83	49	49	0	90.74	1	-1	AGGATATACTCTGATCATCAATTGCCAAATGTTTCATCCATAACAGTGAGAGGA	AGGATATACTTTGATCATCACTTGCTAAATGTTTCAGCCATACCAGTGAGAGGA	69	1314	NC_026151.1_-_XP_020551000.1 Sesamum indicum cultivar Zhongzhi No. 13 linkage group LG7, S_indicum_v1.0, whole genome shotgun sequence	protein prenyltransferase alpha subunit repeat-containing protein 1 isoform X6
	5640	NC_026151.1 - XP_020551002.1	90.741	54	5	0	16	69	1033	980	3.79e-14	76.1	NC_026151.1_-_XP_020551002.1	83	49	49	0	90.74	1	-1	AGGATATACTCTGATCATCAATTGCCAAATGTTTCATCCATAACAGTGAGAGGA	AGGATATACTTTGATCATCACTTGCTAAATGTTTCAGCCATACCAGTGAGAGGA	69	1314	NC_026151.1_-_XP_020551002.1 Sesamum indicum cultivar Zhongzhi No. 13 linkage group LG7, S_indicum_v1.0, whole genome shotgun sequence	protein prenyltransferase alpha subunit repeat-containing protein 1 isoform X6
	3603	NC_026149.1 - XP_011078470.1	85.938	64	9	0	6	69	1474	1537	3.79e-14	76.1	NC_026149.1_-_XP_011078470.1	83	55	55	0	85.94	1	1	AGTGCGTCGGGTATAATCTTCCCGATCATCAAGGCTGAAGGAGTGAGGCAGATGTTCTTTCCGG	AGCGCTTCAGGGATAATCTTGCCTATCATAAAGGCAGAAGGAGTGAGGCAAATGTTCTTTCCGG	69	1578	NC_026149.1_-_XP_011078470.1 Sesamum indicum cultivar Zhongzhi No. 13 linkage group LG5, S_indicum_v1.0, whole genome shotgun sequence	squalene monooxygenase
	9296	NC_026154.1 - XP_011092466.1	84.746	59	9	0	11	69	1197	1139	1.96e-11	67.1	NC_026154.1_-_XP_011092466.1	73	50	50	0	84.75	1	-1	CTTTCTTAGAGTGTAGAAGGATTCGAGATACTTGCAGAGTGTAGCTGCGTCGTGTAGGT	CTTTCTCAGGGTGTAGAAGGACTCAAGATACTTGCACAGAGTAGGTGCATCGTGTAAGT	69	1584	NC_026154.1_-_XP_011092466.1 Sesamum indicum cultivar Zhongzhi No. 13 linkage group LG10, S_indicum_v1.0, whole genome shotgun sequence	squalene monooxygenase-like
	5280	NC_026154.1 - XP_011092839.1	82.609	69	12	0	1	69	1102	1034	4.62e-13	71.6	NC_026154.1_-_XP_011092839.1	78	57	57	0	82.61	1	-1	TGCAGATTTTCAAGATTTTCTCTAAGTTATCTTTGGTCTTTCTGGCGTTAGGGTCAGCCTCGTCAACCT	TGCAGATTTTCAGGATTGCTTCCAAGTTCTCTTTTGTCTTTTTAGCATTAGGATCAGCATCGTCAACCT	69	1245	NC_026154.1_-_XP_011092839.1 Sesamum indicum cultivar Zhongzhi No. 13 linkage group LG10, S_indicum_v1.0, whole genome shotgun sequence	squalene synthase
	5280	NC_026154.1 - XP_011092841.1	82.609	69	12	0	1	69	1102	1034	4.62e-13	71.6	NC_026154.1_-_XP_011092841.1	78	57	57	0	82.61	1	-1	TGCAGATTTTCAAGATTTTCTCTAAGTTATCTTTGGTCTTTCTGGCGTTAGGGTCAGCCTCGTCAACCT	TGCAGATTTTCAGGATTGCTTCCAAGTTCTCTTTTGTCTTTTTAGCATTAGGATCAGCATCGTCAACCT	69	1245	NC_026154.1_-_XP_011092841.1 Sesamum indicum cultivar Zhongzhi No. 13 linkage group LG10, S_indicum_v1.0, whole genome shotgun sequence	squalene synthase
	4990	NC_026150.1 - XP_011082248.1	89.583	48	5	0	16	63	101	54	6.86e-11	65.3	NC_026150.1_-_XP_011082248.1	71	43	43	0	89.58	1	-1	GTGAAAAGATCGCCCCACAGACTTGGGGAGAAGTTGGCCAAAGGGCGA	GTGAAAAGATCGCCCCATAGACTAGGTGAGAAGTTAGCCAACGGGCGA	69	1683	NC_026150.1_-_XP_011082248.1 Sesamum indicum cultivar Zhongzhi No. 13 linkage group LG6, S_indicum_v1.0, whole genome shotgun sequence	vetispiradiene synthase 3 isoform X2
	15	NC_026145.1 - XP_011074804.1	90.909	66	6	0	4	69	401	336	1.41e-19	93.3	NC_026145.1_-_XP_011074804.1	102	60	60	0	90.91	1	-1	AGAAAAAATAAAGTGCCACCAGATGCATTCACTGGAATCAGAACTAGTATTGCTGCAATGGCTATT	AGAAAAAATAAAGTGCCACCAGATGCATTCACTGGGAGCAGAACTAGGAATGCCACAATGGCTATT	69	2328	NC_026145.1_-_XP_011074804.1 Sesamum indicum cultivar Zhongzhi No. 13 linkage group LG1, S_indicum_v1.0, whole genome shotgun sequence	CSC1-like protein At1g32090 isoform X2
	15	NC_026150.1 - XP_011082330.1	86.765	68	9	0	2	69	400	333	2.56e-16	83.3	NC_026150.1_-_XP_011082330.1	91	59	59	0	86.76	1	-1	GCAGAAAAAATAAAGTGCCACCAGATGCATTCACTGGAATCAGAACTAGTATTGCTGCAATGGCTATT	GCAGAAAAAATAAAGTTCCATCAGAAACATTCACTGGAATCAGAAGTAGAAGAGCTGCAATTGCTATT	69	2403	NC_026150.1_-_XP_011082330.1 Sesamum indicum cultivar Zhongzhi No. 13 linkage group LG6, S_indicum_v1.0, whole genome shotgun sequence	CSC1-like protein At1g32090
	24	NC_026153.1 - XP_011089580.1	81.538	65	12	0	5	69	505	569	6.86e-11	64.4	NC_026153.1_-_XP_011089580.1	70	53	53	0	81.54	1	1	GAAAAACATGGAACTTGTTCCGCTTCAGTCACTGGAGATGAATACAGTTACTTTGTGACGGCACT	GAAAAGCATGGAACTTGTGCCTCTTCAGTTGTAGGAGATGAATACAAGTACTTCTTGACGACACT	69	915	NC_026153.1_-_XP_011089580.1 Sesamum indicum cultivar Zhongzhi No. 13 linkage group LG9, S_indicum_v1.0, whole genome shotgun sequence	ribonuclease 2
	25	NC_026153.1 - XP_011089580.1	81.538	65	12	0	5	69	505	569	6.86e-11	64.4	NC_026153.1_-_XP_011089580.1	70	53	53	0	81.54	1	1	GAAAAACATGGAACTTGTTCCGCTTCAGTCACTGGAGATGAATACAGTTACTTTGTGACGGCACT	GAAAAGCATGGAACTTGTGCCTCTTCAGTTGTAGGAGATGAATACAAGTACTTCTTGACGACACT	69	915	NC_026153.1_-_XP_011089580.1 Sesamum indicum cultivar Zhongzhi No. 13 linkage group LG9, S_indicum_v1.0, whole genome shotgun sequence	ribonuclease 2
	74	NC_026153.1 - XP_011088887.1	88.235	68	8	0	2	69	866	799	6.01e-18	87.8	NC_026153.1_-_XP_011088887.1	96	60	60	0	88.24	1	-1	GCAGAAAACAATGGTAGATTTGTTGGGCATCTGAAAACATCCCCGTGAATGTACTTCCACCCAACCTC	GCAGAAAACAATGGCAGGTTTGTCGGGCACCTGAATACATCCCCATGAATGTATTTCCAACCAACCTC	69	1758	NC_026153.1_-_XP_011088887.1 Sesamum indicum cultivar Zhongzhi No. 13 linkage group LG9, S_indicum_v1.0, whole genome shotgun sequence	transmembrane 9 superfamily member 5 isoform X2
	74	NC_026153.1 - XP_011088888.1	88.235	68	8	0	2	69	707	640	6.01e-18	87.8	NC_026153.1_-_XP_011088888.1	96	60	60	0	88.24	1	-1	GCAGAAAACAATGGTAGATTTGTTGGGCATCTGAAAACATCCCCGTGAATGTACTTCCACCCAACCTC	GCAGAAAACAATGGCAGGTTTGTCGGGCACCTGAATACATCCCCATGAATGTATTTCCAACCAACCTC	69	1599	NC_026153.1_-_XP_011088888.1 Sesamum indicum cultivar Zhongzhi No. 13 linkage group LG9, S_indicum_v1.0, whole genome shotgun sequence	transmembrane 9 superfamily member 5 isoform X2
	133	NC_026153.1 - XP_011089698.1	89.583	48	5	0	5	52	655	702	6.86e-11	65.3	NC_026153.1_-_XP_011089698.1	71	43	43	0	89.58	1	1	GAAAAGATGACTCAAGATCAGTTGATCTGGTTGTACTCAATTATGTTA	GAAAAGATGACTTCAGATCAGTTGGTATGGTTGTACTCAATTATGATA	69	1242	NC_026153.1_-_XP_011089698.1 Sesamum indicum cultivar Zhongzhi No. 13 linkage group LG9, S_indicum_v1.0, whole genome shotgun sequence	metal tolerance protein 4-like
	149	NC_026152.1 - XP_011086697.1	87.719	57	7	0	13	69	2001	2057	4.62e-13	72.5	NC_026152.1_-_XP_011086697.1	79	50	50	0	87.72	1	1	GAACGTCTCTTCAAACGCAGCTGATGGCATTCTTTCTAACGAGCACTTTCAAAGAAT	GAACACCTCTTCTAACACAGATGATGGCATTCTTTCTAATGAGGACTTTCAAAGAAT	69	2424	NC_026152.1_-_XP_011086697.1 Sesamum indicum cultivar Zhongzhi No. 13 linkage group LG8, S_indicum_v1.0, whole genome shotgun sequence	protein SDA1 homolog
	158	NC_026152.1 - XP_011086898.2	88.406	69	8	0	1	69	2061	1993	1.72e-18	89.7	NC_026152.1_-_XP_011086898.2	98	61	61	0	88.41	1	-1	TGCAGAAAAGGCTGGTTTTGCTACTATCAAGGAGTTGTACATAGATGATCCTTTTTCCCAAACCATGCT	TGCAGAAAGCGCTGGTCTTGCTACTATCAACGAGTTGTACATTGAAGAGCCCTTTTCCCAAACCATGCT	69	3243	NC_026152.1_-_XP_011086898.2 Sesamum indicum cultivar Zhongzhi No. 13 linkage group LG8, S_indicum_v1.0, whole genome shotgun sequence	retinoblastoma-related protein isoform X3
	158	NC_026152.1 - XP_011086897.2	88.406	69	8	0	1	69	2058	1990	1.72e-18	89.7	NC_026152.1_-_XP_011086897.2	98	61	61	0	88.41	1	-1	TGCAGAAAAGGCTGGTTTTGCTACTATCAAGGAGTTGTACATAGATGATCCTTTTTCCCAAACCATGCT	TGCAGAAAGCGCTGGTCTTGCTACTATCAACGAGTTGTACATTGAAGAGCCCTTTTCCCAAACCATGCT	69	3240	NC_026152.1_-_XP_011086897.2 Sesamum indicum cultivar Zhongzhi No. 13 linkage group LG8, S_indicum_v1.0, whole genome shotgun sequence	retinoblastoma-related protein isoform X3
	193	NC_026147.1 - XP_011071928.1	85.075	67	10	0	3	69	1121	1055	1.09e-14	77	NC_026147.1_-_XP_011071928.1	84	57	57	0	85.07	1	-1	CAGAAAATCACCCAAGAATTCACCTCCAAAGCAATGCAAACTCCCACCAACGTAGACAGACACAAAC	CAGAAAATGACCCAAGAATTCACCTCCAACGCAATGCAAAACCCGACCAATGTACTCAAGCACAAAC	69	1209	NC_026147.1_-_XP_011071928.1 Sesamum indicum cultivar Zhongzhi No. 13 linkage group LG3, S_indicum_v1.0, whole genome shotgun sequence	cytochrome b561 and DOMON domain-containing protein At2g04850
	202	NC_026147.1 - XP_011071751.2	85.246	61	9	0	1	61	780	720	1.61e-12	70.7	NC_026147.1_-_XP_011071751.2	77	52	52	0	85.25	1	-1	TGCAGAAAATCGAAAGCTCTGTCCCATTTTCTTGACCAACACAGCATCATCCTCCGCAGCT	TGCTGAGAAACGGAAGCTTTGTCCCATGTGCTTGACTAACACGGCATCATCCTCCGCAGCT	69	996	NC_026147.1_-_XP_011071751.2 Sesamum indicum cultivar Zhongzhi No. 13 linkage group LG3, S_indicum_v1.0, whole genome shotgun sequence	LOW QUALITY PROTEIN: probable ATP-dependent RNA helicase DDX46
	211	NC_026146.1 - XP_011069559.1	80.882	68	13	0	2	69	1171	1238	6.86e-11	65.3	NC_026146.1_-_XP_011069559.1	71	55	55	0	80.88	1	1	GCAGAAAATGCAATCCACCTTCGCCGGGTTGATGAGGCGGTCAACAAGGCTGTAATGGCGGCAAATAG	GCAGAAAACGCGATCCACCTTCGCCGGGTGGATGAACAGGTGAACAAGGCCGTGGTGGCTGCCAACAG	69	1320	NC_026146.1_-_XP_011069559.1 Sesamum indicum cultivar Zhongzhi No. 13 linkage group LG2, S_indicum_v1.0, whole genome shotgun sequence	MORN repeat-containing protein 1
	214	NC_026155.1 - XP_011095177.1	86.154	65	9	0	5	69	1556	1492	1.09e-14	77.9	NC_026155.1_-_XP_011095177.1	85	56	56	0	86.15	1	-1	GAAAATGCAGAAGATATTCCATATCGTTCTCCATCCTTCAGTTCATCATCATCTTCTTCAACCAA	GAAAATGCAGAAGATAATCCATATCTCTCTCCATCTTTTTGTTCGTCATCATCCTCCTCAACCAA	69	3180	NC_026155.1_-_XP_011095177.1 Sesamum indicum cultivar Zhongzhi No. 13 linkage group LG11, S_indicum_v1.0, whole genome shotgun sequence	helicase-like transcription factor CHR28
	238	NC_026156.1 - XP_011096305.1	85.507	69	10	0	1	69	2831	2899	8.92e-16	80.6	NC_026156.1_-_XP_011096305.1	88	59	59	0	85.51	1	1	TGCAGAAAATTTATGAGGATGAGTGGGCAAATTTTATGGAACGTATGCACAGGGAAGGACTGCGAGATG	TGCAAAAGATTTATGCAGATGAGTGGGAAAATTTTATGGAACGTATGCGCAAGGAAGGAATGCAGGATG	69	5334	NC_026156.1_-_XP_011096305.1 Sesamum indicum cultivar Zhongzhi No. 13 linkage group LG12, S_indicum_v1.0, whole genome shotgun sequence	callose synthase 11
	263	NC_026159.1 - XP_011099460.1	84.058	69	11	0	1	69	72	4	3.79e-14	76.1	NC_026159.1_-_XP_011099460.1	83	58	58	0	84.06	1	-1	TGCAGAAACAAGGTCAACGCTTATTTTAGTGTTCTGCGCTGCTTCCCATTCCAACTCCTGCTGCTTCTC	TGCAGAAACAAGGTCTACATTTATCTCAATGCTCTGTGCTTCTTCCCATTCCAACTCCTGCTGACTCTC	69	2508	NC_026159.1_-_XP_011099460.1 Sesamum indicum cultivar Zhongzhi No. 13 linkage group LG15, S_indicum_v1.0, whole genome shotgun sequence	glycine-rich domain-containing protein 1-like
	263	NC_026159.1 - XP_020554680.1	84.058	69	11	0	1	69	72	4	3.79e-14	76.1	NC_026159.1_-_XP_020554680.1	83	58	58	0	84.06	1	-1	TGCAGAAACAAGGTCAACGCTTATTTTAGTGTTCTGCGCTGCTTCCCATTCCAACTCCTGCTGCTTCTC	TGCAGAAACAAGGTCTACATTTATCTCAATGCTCTGTGCTTCTTCCCATTCCAACTCCTGCTGACTCTC	69	2508	NC_026159.1_-_XP_020554680.1 Sesamum indicum cultivar Zhongzhi No. 13 linkage group LG15, S_indicum_v1.0, whole genome shotgun sequence	glycine-rich domain-containing protein 1-like
	265	NC_026147.1 - XP_011072422.1	87.097	62	8	0	1	62	311	372	1.09e-14	77	NC_026147.1_-_XP_011072422.1	84	54	54	0	87.1	1	1	TGCAGAAACAAGTCTCTCAATTAGTATATGAAAACAGCTACTTTCGCCAGCATACACCAAAT	TGCAGAAACAGGTCTCACAATTGGTGTATGAGAACAGTTACTTTCGCCAGCATACTCCGAAT	69	2523	NC_026147.1_-_XP_011072422.1 Sesamum indicum cultivar Zhongzhi No. 13 linkage group LG3, S_indicum_v1.0, whole genome shotgun sequence	LOW QUALITY PROTEIN: homeobox-leucine zipper protein ATHB-15
	265	NC_026145.1 - XP_011080516.1	83.333	60	10	0	1	60	332	391	6.86e-11	64.4	NC_026145.1_-_XP_011080516.1	70	50	50	0	83.33	1	1	TGCAGAAACAAGTCTCTCAATTAGTATATGAAAACAGCTACTTTCGCCAGCATACACCAA	TGCAGAAACAGGTGTCACAGTTGGTTTACGAAAACGGCTACTTTCGCCAGCATGCTCCAA	69	2538	NC_026145.1_-_XP_011080516.1 Sesamum indicum cultivar Zhongzhi No. 13 linkage group LG1, S_indicum_v1.0, whole genome shotgun sequence	homeobox-leucine zipper protein ATHB-15
	282	NC_026160.1 - XP_020555070.1	86.885	61	5	1	5	65	2258	2201	1.32e-13	73.4	NC_026160.1_-_XP_020555070.1	80	53	53	3	86.89	1	-1	GAAACACCATATGGCCCATAGTTGCCAGGCACTCCAATTGGAGCAGAGGTTCCTATATTTG	GAAAGACCATATGGCCCATAGTTGCCAGGCACTCCAA---GAGTTGAGCTTCCTGTATTTG	69	2661	NC_026160.1_-_XP_020555070.1 Sesamum indicum cultivar Zhongzhi No. 13 linkage group LG16, S_indicum_v1.0, whole genome shotgun sequence	GBF-interacting protein 1-like
	291	NC_026152.1 - XP_011086614.1	87.5	56	7	0	1	56	1169	1114	1.61e-12	70.7	NC_026152.1_-_XP_011086614.1	77	49	49	0	87.5	1	-1	TGCAGAAACAGATCAAACTCATCATCCCTACACAACATGCTTATCCTCACATACTC	TGGAGAAAGAGATCAAACTCCTCATCCCTACTCAGCATGCTTATTCTTACATACTC	69	1203	NC_026152.1_-_XP_011086614.1 Sesamum indicum cultivar Zhongzhi No. 13 linkage group LG8, S_indicum_v1.0, whole genome shotgun sequence	L-tryptophan--pyruvate aminotransferase 1
	296	NC_026150.1 - XP_011079889.1	92.593	54	4	0	1	54	891	838	8.92e-16	80.6	NC_026150.1_-_XP_011079889.1	88	50	50	0	92.59	1	-1	TGCAGAAACAGCTGCTTGTCCCAAGTGTGACCGAAAATCATTGCTGATGTTTGG	TGCAGATACAGCCGCTTTACCCAAGTGTGACCGAAAATCATTGCTGATGTTTGG	69	2217	NC_026150.1_-_XP_011079889.1 Sesamum indicum cultivar Zhongzhi No. 13 linkage group LG6, S_indicum_v1.0, whole genome shotgun sequence	methylcrotonoyl-CoA carboxylase subunit alpha, mitochondrial isoform X3
	296	NC_026150.1 - XP_011079890.1	92.593	54	4	0	1	54	891	838	8.92e-16	80.6	NC_026150.1_-_XP_011079890.1	88	50	50	0	92.59	1	-1	TGCAGAAACAGCTGCTTGTCCCAAGTGTGACCGAAAATCATTGCTGATGTTTGG	TGCAGATACAGCCGCTTTACCCAAGTGTGACCGAAAATCATTGCTGATGTTTGG	69	2202	NC_026150.1_-_XP_011079890.1 Sesamum indicum cultivar Zhongzhi No. 13 linkage group LG6, S_indicum_v1.0, whole genome shotgun sequence	methylcrotonoyl-CoA carboxylase subunit alpha, mitochondrial isoform X3
	297	NC_026154.1 - XP_011091362.1	82.609	69	12	0	1	69	459	391	4.62e-13	71.6	NC_026154.1_-_XP_011091362.1	78	57	57	0	82.61	1	-1	TGCAGAAACAGCTTTTCTAATGGCCCATCCATGGTACGGAGCAAAAACTTGTCCGTAGGATCTTGAAGC	TGCACCAACAGCTTTTCTGATGGCCCATCCATGGTAGGGAGCAAACACCTGTGCATAAGCTTTCGAAGC	69	621	NC_026154.1_-_XP_011091362.1 Sesamum indicum cultivar Zhongzhi No. 13 linkage group LG10, S_indicum_v1.0, whole genome shotgun sequence	accelerated cell death 11
	300	NC_026152.1 - XP_011087739.1	95.522	67	3	0	3	69	2457	2523	6.42e-24	108	NC_026152.1_-_XP_011087739.1	119	64	64	0	95.52	1	1	CAGAAACAGTCACGCCCACCACAAGACAGGACAATGGTTGTTGCAACCCTTGCTGAAGTTGCACAGC	CAGAAACAATCACGCCCACCACAAGACAGGACAATGGTTGTTGCAACCCTTGCAGAAGTTGCTCAGC	69	2562	NC_026152.1_-_XP_011087739.1 Sesamum indicum cultivar Zhongzhi No. 13 linkage group LG8, S_indicum_v1.0, whole genome shotgun sequence	importin-4 isoform X3
	300	NC_026152.1 - XP_020551643.1	95.455	66	3	0	4	69	2435	2500	2.24e-23	106	NC_026152.1_-_XP_020551643.1	117	63	63	0	95.45	1	1	AGAAACAGTCACGCCCACCACAAGACAGGACAATGGTTGTTGCAACCCTTGCTGAAGTTGCACAGC	AGAAACAATCACGCCCACCACAAGACAGGACAATGGTTGTTGCAACCCTTGCAGAAGTTGCTCAGC	69	3087	NC_026152.1_-_XP_020551643.1 Sesamum indicum cultivar Zhongzhi No. 13 linkage group LG8, S_indicum_v1.0, whole genome shotgun sequence	importin-4 isoform X3
	303	NC_026147.1 - XP_011072728.1	82.609	69	12	0	1	69	1767	1835	4.62e-13	71.6	NC_026147.1_-_XP_011072728.1	78	57	57	0	82.61	1	1	TGCAGAAACATACATAAATATGAACGGGAATCCAGATGAAATTGAGTGGTTCCCTACTCCCGTATTTCA	TGCAGATATGTATATAAACATGGATGGGAATACAGATGAAATAGAGTGGTTCCCTTCTCCCATATTCCA	69	2325	NC_026147.1_-_XP_011072728.1 Sesamum indicum cultivar Zhongzhi No. 13 linkage group LG3, S_indicum_v1.0, whole genome shotgun sequence	exocyst complex component EXO84B
	306	NC_026152.1 - XP_011086614.1	87.5	56	7	0	1	56	1169	1114	1.61e-12	70.7	NC_026152.1_-_XP_011086614.1	77	49	49	0	87.5	1	-1	TGCAGAAACATATCAAACTCCTCATCCCTACTCATCATGCTTATCCTCACAAACTC	TGGAGAAAGAGATCAAACTCCTCATCCCTACTCAGCATGCTTATTCTTACATACTC	69	1203	NC_026152.1_-_XP_011086614.1 Sesamum indicum cultivar Zhongzhi No. 13 linkage group LG8, S_indicum_v1.0, whole genome shotgun sequence	L-tryptophan--pyruvate aminotransferase 1
	306	NC_026146.1 - XP_020547621.1	85.455	55	8	0	1	55	794	740	6.86e-11	64.4	NC_026146.1_-_XP_020547621.1	70	47	47	0	85.45	1	-1	TGCAGAAACATATCAAACTCCTCATCCCTACTCATCATGCTTATCCTCACAAACT	TGCAGGAAAAGATCAAATTCCTCATCCCTACTCAGCATGCTTATTCTAACATACT	69	831	NC_026146.1_-_XP_020547621.1 Sesamum indicum cultivar Zhongzhi No. 13 linkage group LG2, S_indicum_v1.0, whole genome shotgun sequence	LOW QUALITY PROTEIN: tryptophan aminotransferase-related protein 2
	307	NC_026152.1 - XP_011086614.1	87.5	56	7	0	1	56	1169	1114	1.61e-12	70.7	NC_026152.1_-_XP_011086614.1	77	49	49	0	87.5	1	-1	TGCAGAAACATATCAAACTCCTCATCCCTACTCATCATGCTTATCCTCACAAACTC	TGGAGAAAGAGATCAAACTCCTCATCCCTACTCAGCATGCTTATTCTTACATACTC	69	1203	NC_026152.1_-_XP_011086614.1 Sesamum indicum cultivar Zhongzhi No. 13 linkage group LG8, S_indicum_v1.0, whole genome shotgun sequence	L-tryptophan--pyruvate aminotransferase 1
	307	NC_026146.1 - XP_020547621.1	85.455	55	8	0	1	55	794	740	6.86e-11	64.4	NC_026146.1_-_XP_020547621.1	70	47	47	0	85.45	1	-1	TGCAGAAACATATCAAACTCCTCATCCCTACTCATCATGCTTATCCTCACAAACT	TGCAGGAAAAGATCAAATTCCTCATCCCTACTCAGCATGCTTATTCTAACATACT	69	831	NC_026146.1_-_XP_020547621.1 Sesamum indicum cultivar Zhongzhi No. 13 linkage group LG2, S_indicum_v1.0, whole genome shotgun sequence	LOW QUALITY PROTEIN: tryptophan aminotransferase-related protein 2
	311	NC_026150.1 - XP_011080899.1	86.957	69	9	0	1	69	1330	1398	7.32e-17	85.1	NC_026150.1_-_XP_011080899.1	93	60	60	0	86.96	1	1	TGCAGAAACATCATTACTTGGCTGAGGTCCTCTAGGTTGGGCTATTTTGTGCCATTCGACGATAACATC	TGCAGGAACACCATTACTTGGCTGAGGTCCTCTAAGATGGGGTATTTTGTGCCCTTTGATGACAACATC	69	2853	NC_026150.1_-_XP_011080899.1 Sesamum indicum cultivar Zhongzhi No. 13 linkage group LG6, S_indicum_v1.0, whole genome shotgun sequence	respiratory burst oxidase homolog protein A
	320	NC_026145.1 - XP_011080919.1	92.647	68	5	0	1	68	702	635	9.52e-22	101	NC_026145.1_-_XP_011080919.1	111	63	63	0	92.65	1	-1	TGCAGAAACATTGTGTGTGTGGCCTTCTAGTGTCTGCACGCAGCTCTTTGTCTGGTAATCCCACACCT	TGCAGAAACATTGTGCGTGTGGCCTTCTAATGTCTGGATACAGCTCTTTGTCTGGTAATCCCACACCT	69	2739	NC_026145.1_-_XP_011080919.1 Sesamum indicum cultivar Zhongzhi No. 13 linkage group LG1, S_indicum_v1.0, whole genome shotgun sequence	coatomer subunit beta'-2 isoform X1
	320	NC_026145.1 - XP_011080927.1	92.647	68	5	0	1	68	702	635	9.52e-22	101	NC_026145.1_-_XP_011080927.1	111	63	63	0	92.65	1	-1	TGCAGAAACATTGTGTGTGTGGCCTTCTAGTGTCTGCACGCAGCTCTTTGTCTGGTAATCCCACACCT	TGCAGAAACATTGTGCGTGTGGCCTTCTAATGTCTGGATACAGCTCTTTGTCTGGTAATCCCACACCT	69	2739	NC_026145.1_-_XP_011080927.1 Sesamum indicum cultivar Zhongzhi No. 13 linkage group LG1, S_indicum_v1.0, whole genome shotgun sequence	coatomer subunit beta'-2 isoform X1
	323	NC_026150.1 - XP_020550283.1	85.294	68	10	0	2	69	638	571	3.11e-15	78.8	NC_026150.1_-_XP_020550283.1	86	58	58	0	85.29	1	-1	GCAGAAACCAATCCATTAGCAGACATAACACATAGAGCTCTTGGCCTCTGCTGTGCAAATGCCAGTAT	GCAGAAACTGTTCCATTAGCTGACATGATGCATAATGCTCTTGGCCTCTGTTGTGCAAATGCCAGTAT	69	1077	NC_026150.1_-_XP_020550283.1 Sesamum indicum cultivar Zhongzhi No. 13 linkage group LG6, S_indicum_v1.0, whole genome shotgun sequence	LOW QUALITY PROTEIN: AT-hook motif nuclear-localized protein 5-like
	323	NC_026145.1 - XP_020550700.1	82.609	69	12	0	1	69	660	592	4.62e-13	71.6	NC_026145.1_-_XP_020550700.1	78	57	57	0	82.61	1	-1	TGCAGAAACCAATCCATTAGCAGACATAACACATAGAGCTCTTGGCCTCTGCTGTGCAAATGCCAGTAT	TGCAGAAACAGATCCACTACCTGACAAGATGCATAAAGCTCTTGGCCTCTGTTGTGCAAATGCCAATAT	69	1104	NC_026145.1_-_XP_020550700.1 Sesamum indicum cultivar Zhongzhi No. 13 linkage group LG1, S_indicum_v1.0, whole genome shotgun sequence	AT-hook motif nuclear-localized protein 5
	324	NC_026156.1 - XP_011095896.1	87.302	63	8	0	5	67	225	287	3.11e-15	78.8	NC_026156.1_-_XP_011095896.1	86	55	55	0	87.3	1	1	GAAACCAATTGTTCCGGTTGATCTTTACAGAGGGATACGTGATTCCCAGCTAATAGGATTGTC	GAAACCCATTGTTCCTATAGAGCTTTACAGAGGGATACGTGATTCACAGCTTATAGGATTATC	69	1017	NC_026156.1_-_XP_011095896.1 Sesamum indicum cultivar Zhongzhi No. 13 linkage group LG12, S_indicum_v1.0, whole genome shotgun sequence	phosphatidylinositol/phosphatidylcholine transfer protein SFH2
	324	NC_026156.1 - XP_011095897.1	87.302	63	8	0	5	67	225	287	3.11e-15	78.8	NC_026156.1_-_XP_011095897.1	86	55	55	0	87.3	1	1	GAAACCAATTGTTCCGGTTGATCTTTACAGAGGGATACGTGATTCCCAGCTAATAGGATTGTC	GAAACCCATTGTTCCTATAGAGCTTTACAGAGGGATACGTGATTCACAGCTTATAGGATTATC	69	1017	NC_026156.1_-_XP_011095897.1 Sesamum indicum cultivar Zhongzhi No. 13 linkage group LG12, S_indicum_v1.0, whole genome shotgun sequence	phosphatidylinositol/phosphatidylcholine transfer protein SFH2
	325	NC_026159.1 - XP_011100079.1	91.304	69	6	0	1	69	103	35	3.32e-21	98.7	NC_026159.1_-_XP_011100079.1	108	63	63	0	91.3	1	-1	TGCAGAAACCACGGCCATCAACACGGACAATAATTATGTTGGGCAGCATGATCTCATCCTCCACCTCAA	TGCGGAAATCACGGCCATCGACACGGACAATGATTATATTGGGCAACATGATCTCATCCTCCACCTCAA	69	1596	NC_026159.1_-_XP_011100079.1 Sesamum indicum cultivar Zhongzhi No. 13 linkage group LG15, S_indicum_v1.0, whole genome shotgun sequence	tRNA(His) guanylyltransferase 1
	333	NC_026147.1 - XP_020548041.1	84.058	69	11	0	1	69	1090	1022	3.79e-14	76.1	NC_026147.1_-_XP_020548041.1	83	58	58	0	84.06	1	-1	TGCAGAAACCCTCAATCACAATACCATAACTATATAAATTTGCTGCAATTCCGGAATTCTCCATTTCAT	TGCAAAAACCCTCAATCAGAATGCTATAACTATATACATCTGCTGCAATTCCACCATTCTTCATCTCAT	69	2229	NC_026147.1_-_XP_020548041.1 Sesamum indicum cultivar Zhongzhi No. 13 linkage group LG3, S_indicum_v1.0, whole genome shotgun sequence	pentatricopeptide repeat-containing protein At1g63130, mitochondrial
	333	NC_026147.1 - XP_020548042.1	84.058	69	11	0	1	69	1090	1022	3.79e-14	76.1	NC_026147.1_-_XP_020548042.1	83	58	58	0	84.06	1	-1	TGCAGAAACCCTCAATCACAATACCATAACTATATAAATTTGCTGCAATTCCGGAATTCTCCATTTCAT	TGCAAAAACCCTCAATCAGAATGCTATAACTATATACATCTGCTGCAATTCCACCATTCTTCATCTCAT	69	2229	NC_026147.1_-_XP_020548042.1 Sesamum indicum cultivar Zhongzhi No. 13 linkage group LG3, S_indicum_v1.0, whole genome shotgun sequence	pentatricopeptide repeat-containing protein At1g63130, mitochondrial
	350	NC_026149.1 - XP_011078923.1	84.058	69	11	0	1	69	293	225	3.79e-14	76.1	NC_026149.1_-_XP_011078923.1	83	58	58	0	84.06	1	-1	TGCAGAAACGCAATCAAAGGAGCAGCTCCATCTTCCAAAGACTTCAACCTGCCCACCACCTCAACTCTC	TGCAGAAATGTAATCAAAGGAGCTGCTGCCTCTTCCAATGCCTTAAGCCTACCCACCACCTCAGCTCTC	69	1317	NC_026149.1_-_XP_011078923.1 Sesamum indicum cultivar Zhongzhi No. 13 linkage group LG5, S_indicum_v1.0, whole genome shotgun sequence	eukaryotic translation initiation factor 3 subunit E
	350	NC_026148.1 - XP_011075359.1	84.058	69	11	0	1	69	293	225	3.79e-14	76.1	NC_026148.1_-_XP_011075359.1	83	58	58	0	84.06	1	-1	TGCAGAAACGCAATCAAAGGAGCAGCTCCATCTTCCAAAGACTTCAACCTGCCCACCACCTCAACTCTC	TGCAGAAAGGCAATCAAAGGAGCTGCTCCCTCTTCCAGTGCCTTCAGCCTACCTACCACCTCGGCTCTC	69	1317	NC_026148.1_-_XP_011075359.1 Sesamum indicum cultivar Zhongzhi No. 13 linkage group LG4, S_indicum_v1.0, whole genome shotgun sequence	eukaryotic translation initiation factor 3 subunit E
	351	NC_026149.1 - XP_011078051.1	91.304	69	6	0	1	69	4398	4330	3.32e-21	98.7	NC_026149.1_-_XP_011078051.1	108	63	63	0	91.3	1	-1	TGCAGAAACGCTGTGAGTGCCATATTTGTCATCCCAGTACATGGTGCTAATCCTGTATAATTGCTGGAT	TGAAGAAACACTGTGGGTGCCGTATTTGTCATCCCAGTACATGGTGCTAATCCTGTATAATTGTTGAAT	69	4608	NC_026149.1_-_XP_011078051.1 Sesamum indicum cultivar Zhongzhi No. 13 linkage group LG5, S_indicum_v1.0, whole genome shotgun sequence	LOW QUALITY PROTEIN: myosin-17-like
	356	NC_026152.1 - XP_011085790.1	90.323	62	6	0	4	65	491	552	2.1e-17	86	NC_026152.1_-_XP_011085790.1	94	56	56	0	90.32	1	1	AGAAACGTTTTCAAAATGACGATCGTGTGTATAAATCTTTCCTGGACATTCTGAATATGTAT	AGAAACGTTTTGAACATGATGATCATGTTTACAAATCTTTCCTGGACATTCTGAATATGTAT	69	4041	NC_026152.1_-_XP_011085790.1 Sesamum indicum cultivar Zhongzhi No. 13 linkage group LG8, S_indicum_v1.0, whole genome shotgun sequence	paired amphipathic helix protein Sin3-like 2
	356	NC_026159.1 - XP_011098544.1	85.938	64	9	0	4	67	527	590	3.79e-14	76.1	NC_026159.1_-_XP_011098544.1	83	55	55	0	85.94	1	1	AGAAACGTTTTCAAAATGACGATCGTGTGTATAAATCTTTCCTGGACATTCTGAATATGTATCG	AGAAACGTTTTCAAAATGATGACCATGTTTACAAATCTTTCCTAGACATCTTGAATATGTACCG	69	4143	NC_026159.1_-_XP_011098544.1 Sesamum indicum cultivar Zhongzhi No. 13 linkage group LG15, S_indicum_v1.0, whole genome shotgun sequence	paired amphipathic helix protein Sin3-like 2 isoform X2
	358	NC_026151.1 - XP_011084925.1	90.476	63	6	0	7	69	219	281	6.01e-18	87.8	NC_026151.1_-_XP_011084925.1	96	57	57	0	90.48	1	1	AACTAAGAGGACATCAATTTTTGATGATCGGAGCAAGGAGAATGAAGAACTAACAGCCTTGAT	AACCAAAAGGTCATCTATTTTTGATGATCGGAGCAAGGAAAATGAAGAACTAACTGCCTTGAT	69	1005	NC_026151.1_-_XP_011084925.1 Sesamum indicum cultivar Zhongzhi No. 13 linkage group LG7, S_indicum_v1.0, whole genome shotgun sequence	syntaxin-31 isoform X2
	358	NC_026151.1 - XP_011084926.1	90.476	63	6	0	7	69	219	281	6.01e-18	87.8	NC_026151.1_-_XP_011084926.1	96	57	57	0	90.48	1	1	AACTAAGAGGACATCAATTTTTGATGATCGGAGCAAGGAGAATGAAGAACTAACAGCCTTGAT	AACCAAAAGGTCATCTATTTTTGATGATCGGAGCAAGGAAAATGAAGAACTAACTGCCTTGAT	69	993	NC_026151.1_-_XP_011084926.1 Sesamum indicum cultivar Zhongzhi No. 13 linkage group LG7, S_indicum_v1.0, whole genome shotgun sequence	syntaxin-31 isoform X2
	361	NC_026150.1 - XP_011081950.1	92.754	69	5	0	1	69	606	538	2.73e-22	103	NC_026150.1_-_XP_011081950.1	113	64	64	0	92.75	1	-1	TGCAGAAACTAGTGAGGGAACAAGCAACTTATCACCAGGGCCAAAAATGCTGCTAGGTCGAATACAGCA	TGCGGCAACTAATGATGGAACAAGCAACTTATCACCAGGGCCAAAAATGCTGCTAGGTCGAATGCAGCA	69	1683	NC_026150.1_-_XP_011081950.1 Sesamum indicum cultivar Zhongzhi No. 13 linkage group LG6, S_indicum_v1.0, whole genome shotgun sequence	3beta-hydroxysteroid-dehydrogenase/decarboxylase
	361	NC_026150.1 - XP_011081949.1	92.754	69	5	0	1	69	606	538	2.73e-22	103	NC_026150.1_-_XP_011081949.1	113	64	64	0	92.75	1	-1	TGCAGAAACTAGTGAGGGAACAAGCAACTTATCACCAGGGCCAAAAATGCTGCTAGGTCGAATACAGCA	TGCGGCAACTAATGATGGAACAAGCAACTTATCACCAGGGCCAAAAATGCTGCTAGGTCGAATGCAGCA	69	1683	NC_026150.1_-_XP_011081949.1 Sesamum indicum cultivar Zhongzhi No. 13 linkage group LG6, S_indicum_v1.0, whole genome shotgun sequence	3beta-hydroxysteroid-dehydrogenase/decarboxylase
	365	NC_026145.1 - XP_011077316.1	82.609	69	12	0	1	69	452	520	4.62e-13	71.6	NC_026145.1_-_XP_011077316.1	78	57	57	0	82.61	1	1	TGCAGAAACTCACCGCCCAAGAAATCATGGATGCTAAAGCATTAGCCGCCTCCAAGAGCCACAGTGAAG	TGCAGAAGATGACGGCTCAAGAAATTATGGATGCTAAGGCCCTTGCTGCCTCCAAAAGCCACAGTGAAG	69	1071	NC_026145.1_-_XP_011077316.1 Sesamum indicum cultivar Zhongzhi No. 13 linkage group LG1, S_indicum_v1.0, whole genome shotgun sequence	transcription factor bHLH30
	365	NC_026146.1 - XP_011070838.1	81.159	69	13	0	1	69	341	409	1.96e-11	67.1	NC_026146.1_-_XP_011070838.1	73	56	56	0	81.16	1	1	TGCAGAAACTCACCGCCCAAGAAATCATGGATGCTAAAGCATTAGCCGCCTCCAAGAGCCACAGTGAAG	TGCAGAAAATGACGGCACAAGAAATTATGGATGCTAAGGCTCTTGCAGCCTCTAAAAGCCACAGCGAAG	69	966	NC_026146.1_-_XP_011070838.1 Sesamum indicum cultivar Zhongzhi No. 13 linkage group LG2, S_indicum_v1.0, whole genome shotgun sequence	transcription factor bHLH30
	366	NC_026147.1 - XP_011071632.1	95.082	61	3	0	1	61	323	263	1.16e-20	97.8	NC_026147.1_-_XP_011071632.1	107	58	58	0	95.08	1	-1	TGCAGAAACTCCAAGTTGTCCAGTGGCCTCCCCTTCACAAGCTTGCTCACCTCTATATGCT	TGCAGAAACTCCAAGTTGTCCAATGGCCTCCCCTTCACAAGCTTGTTCACCTCAATATGCT	69	843	NC_026147.1_-_XP_011071632.1 Sesamum indicum cultivar Zhongzhi No. 13 linkage group LG3, S_indicum_v1.0, whole genome shotgun sequence	microtubule-associated protein RP/EB family member 1B
	367	NC_026147.1 - XP_011071632.1	95.082	61	3	0	1	61	323	263	1.16e-20	97.8	NC_026147.1_-_XP_011071632.1	107	58	58	0	95.08	1	-1	TGCAGAAACTCCAAGTTGTCCAGTGGCCTCCCCTTCACAAGCTTGCTCACCTCTATATGCT	TGCAGAAACTCCAAGTTGTCCAATGGCCTCCCCTTCACAAGCTTGTTCACCTCAATATGCT	69	843	NC_026147.1_-_XP_011071632.1 Sesamum indicum cultivar Zhongzhi No. 13 linkage group LG3, S_indicum_v1.0, whole genome shotgun sequence	microtubule-associated protein RP/EB family member 1B
	369	NC_026146.1 - XP_020555148.1	89.855	69	7	0	1	69	3089	3021	1.41e-19	94.2	NC_026146.1_-_XP_020555148.1	103	62	62	0	89.86	1	-1	TGCAGAAACTCCATATTGATTTTCAAAGTGTCCGGGCAAGAACTCAACCATGTATCCTTTTCATGAGCA	TGCAAAAACTCCATATTGATTTTTAAAGTATCGGGGCATGAACTCAACCACGTATCCTTCTCATGAGCA	69	5445	NC_026146.1_-_XP_020555148.1 Sesamum indicum cultivar Zhongzhi No. 13 linkage group LG2, S_indicum_v1.0, whole genome shotgun sequence	THO complex subunit 2
	371	NC_026154.1 - XP_011091970.1	91.176	68	6	0	2	69	962	895	1.16e-20	96.9	NC_026154.1_-_XP_011091970.1	106	62	62	0	91.18	1	-1	GCAGAAACTCTTTCTGCAACAGCCATTGCTGATATTCTTCGGGGCTGTGTACAGATTATGTTACAGAA	GCAGAAACTCTTTCTGCAACAGCCATGGCTGATATTCTTCGAGGTTGTGTACAGATAATGCTACAAAA	69	3447	NC_026154.1_-_XP_011091970.1 Sesamum indicum cultivar Zhongzhi No. 13 linkage group LG10, S_indicum_v1.0, whole genome shotgun sequence	DExH-box ATP-dependent RNA helicase DExH3
	371	NC_026154.1 - XP_020552992.1	91.176	68	6	0	2	69	962	895	1.16e-20	96.9	NC_026154.1_-_XP_020552992.1	106	62	62	0	91.18	1	-1	GCAGAAACTCTTTCTGCAACAGCCATTGCTGATATTCTTCGGGGCTGTGTACAGATTATGTTACAGAA	GCAGAAACTCTTTCTGCAACAGCCATGGCTGATATTCTTCGAGGTTGTGTACAGATAATGCTACAAAA	69	3447	NC_026154.1_-_XP_020552992.1 Sesamum indicum cultivar Zhongzhi No. 13 linkage group LG10, S_indicum_v1.0, whole genome shotgun sequence	DExH-box ATP-dependent RNA helicase DExH3
	372	NC_026152.1 - XP_011085212.1	83.824	68	11	0	2	69	637	704	1.32e-13	74.3	NC_026152.1_-_XP_011085212.1	81	57	57	0	83.82	1	1	GCAGAAACTCTTTGTACCATGACTCGATGGGCTCCCCCAAGTTTAGCTTCAAAAATATCCAGCTCAAG	GCAGAAACTCTTTGTACCATTAGCCGATATGCTCCCCAAGGGCTAGCCTCAAAAATATCCAGCCCAAG	69	2331	NC_026152.1_-_XP_011085212.1 Sesamum indicum cultivar Zhongzhi No. 13 linkage group LG8, S_indicum_v1.0, whole genome shotgun sequence	serine/threonine-protein phosphatase 6 regulatory subunit 1 isoform X2
	372	NC_026152.1 - XP_011085213.1	83.824	68	11	0	2	69	637	704	1.32e-13	74.3	NC_026152.1_-_XP_011085213.1	81	57	57	0	83.82	1	1	GCAGAAACTCTTTGTACCATGACTCGATGGGCTCCCCCAAGTTTAGCTTCAAAAATATCCAGCTCAAG	GCAGAAACTCTTTGTACCATTAGCCGATATGCTCCCCAAGGGCTAGCCTCAAAAATATCCAGCCCAAG	69	2331	NC_026152.1_-_XP_011085213.1 Sesamum indicum cultivar Zhongzhi No. 13 linkage group LG8, S_indicum_v1.0, whole genome shotgun sequence	serine/threonine-protein phosphatase 6 regulatory subunit 1 isoform X2
	399	NC_026159.1 - XP_011099744.1	88.71	62	7	0	4	65	67	128	8.92e-16	81.5	NC_026159.1_-_XP_011099744.1	89	55	55	0	88.71	1	1	AGAAAGAAGAAGGCAGTACACAAGACGACTGCATCAGATGACAAAAGGCTTCAAAGTACCTT	AGAAAGAAGAAGGCTGTACACAAGACAACCACGACAGATGACAAAAGGCTTCAAAGCACCTT	69	498	NC_026159.1_-_XP_011099744.1 Sesamum indicum cultivar Zhongzhi No. 13 linkage group LG15, S_indicum_v1.0, whole genome shotgun sequence	basic transcription factor 3
	399	NC_026145.1 - XP_011078817.1	85.484	62	9	0	4	65	67	128	4.62e-13	72.5	NC_026145.1_-_XP_011078817.1	79	53	53	0	85.48	1	1	AGAAAGAAGAAGGCAGTACACAAGACGACTGCATCAGATGACAAAAGGCTTCAAAGTACCTT	AGAAAGAAGAAGGCCGTTCACAAGACCACCACAACGGATGACAAAAGACTTCAAAGCACCTT	69	504	NC_026145.1_-_XP_011078817.1 Sesamum indicum cultivar Zhongzhi No. 13 linkage group LG1, S_indicum_v1.0, whole genome shotgun sequence	basic transcription factor 3-like
	400	NC_026159.1 - XP_011099744.1	93.548	62	4	0	4	65	67	128	4.05e-20	95.1	NC_026159.1_-_XP_011099744.1	104	58	58	0	93.55	1	1	AGAAAGAAGAAGGCTGTACACAAGACGACCACAACAGATGACAAAAGGCTTCAGAGTACCTT	AGAAAGAAGAAGGCTGTACACAAGACAACCACGACAGATGACAAAAGGCTTCAAAGCACCTT	69	498	NC_026159.1_-_XP_011099744.1 Sesamum indicum cultivar Zhongzhi No. 13 linkage group LG15, S_indicum_v1.0, whole genome shotgun sequence	basic transcription factor 3
	400	NC_026145.1 - XP_011078804.1	90.323	62	6	0	4	65	67	128	2.1e-17	86	NC_026145.1_-_XP_011078804.1	94	56	56	0	90.32	1	1	AGAAAGAAGAAGGCTGTACACAAGACGACCACAACAGATGACAAAAGGCTTCAGAGTACCTT	AGAAAGAAGAAGGCTGTTCACAAGACCACCACGACAGATGACAAAAGACTTCAAAGCACCTT	69	504	NC_026145.1_-_XP_011078804.1 Sesamum indicum cultivar Zhongzhi No. 13 linkage group LG1, S_indicum_v1.0, whole genome shotgun sequence	nascent polypeptide-associated complex subunit beta
	406	NC_026150.1 - XP_011080794.1	89.855	69	7	0	1	69	1415	1483	1.41e-19	94.2	NC_026150.1_-_XP_011080794.1	103	62	62	0	89.86	1	1	TGCAGAAAGAAGGTATAGCTTGGTCTGAAGAGAACCGTGGAACACTACTCATCAGGCTTGACGGACAGA	TGCAGAAAGAAGGTATCACATGGTCTGAAGAGAACCGTGGGACACTGTTCATAAGGCTTGACGGACAGA	69	1524	NC_026150.1_-_XP_011080794.1 Sesamum indicum cultivar Zhongzhi No. 13 linkage group LG6, S_indicum_v1.0, whole genome shotgun sequence	SMR domain-containing protein At5g58720 isoform X3
	406	NC_026150.1 - XP_011080796.1	89.855	69	7	0	1	69	1403	1471	1.41e-19	94.2	NC_026150.1_-_XP_011080796.1	103	62	62	0	89.86	1	1	TGCAGAAAGAAGGTATAGCTTGGTCTGAAGAGAACCGTGGAACACTACTCATCAGGCTTGACGGACAGA	TGCAGAAAGAAGGTATCACATGGTCTGAAGAGAACCGTGGGACACTGTTCATAAGGCTTGACGGACAGA	69	1512	NC_026150.1_-_XP_011080796.1 Sesamum indicum cultivar Zhongzhi No. 13 linkage group LG6, S_indicum_v1.0, whole genome shotgun sequence	SMR domain-containing protein At5g58720 isoform X3
	416	NC_026155.1 - XP_011094285.1	85.507	69	10	0	1	69	863	795	8.92e-16	80.6	NC_026155.1_-_XP_011094285.1	88	59	59	0	85.51	1	-1	TGCAGAAAGACCATACTCTCCTTCCCATTCAAATGCATTCCGTCCATGTCCTCCATTTCCAAGCTTACT	TGTAGAAAGACCAGACTCTCCTTCCCGTTCAAGTGTGTTCCATCCATGTCCTCTATTTCTAAGCTCACT	69	1059	NC_026155.1_-_XP_011094285.1 Sesamum indicum cultivar Zhongzhi No. 13 linkage group LG11, S_indicum_v1.0, whole genome shotgun sequence	probable F-box protein At2g36090
	416	NC_026149.1 - XP_011077837.1	85.507	69	10	0	1	69	785	717	8.92e-16	80.6	NC_026149.1_-_XP_011077837.1	88	59	59	0	85.51	1	-1	TGCAGAAAGACCATACTCTCCTTCCCATTCAAATGCATTCCGTCCATGTCCTCCATTTCCAAGCTTACT	TGCAAAATCACCAGACTATCCTTCCCGTTCAAATGCTTTCCATCCATGTCCTCCATTTCCAGGCTCACT	69	978	NC_026149.1_-_XP_011077837.1 Sesamum indicum cultivar Zhongzhi No. 13 linkage group LG5, S_indicum_v1.0, whole genome shotgun sequence	probable F-box protein At2g36090
	427	NC_026147.1 - XP_011071927.1	91.045	67	6	0	1	67	409	343	4.05e-20	95.1	NC_026147.1_-_XP_011071927.1	104	61	61	0	91.04	1	-1	TGCAGAAAGAGGGAGTGAAAGGATGGTCCGGAGAGTGGATATACATGAACATGAACTTATGCTCATC	TGCAGAAAGAGGGAGTGAACGGATGCTCTGGTGAATGGATGTACATGAACATGAACTTATGCTCATC	69	1137	NC_026147.1_-_XP_011071927.1 Sesamum indicum cultivar Zhongzhi No. 13 linkage group LG3, S_indicum_v1.0, whole genome shotgun sequence	plant UBX domain-containing protein 10
	436	NC_026153.1 - XP_011090446.1	88.06	67	8	0	3	69	553	619	2.1e-17	86	NC_026153.1_-_XP_011090446.1	94	59	59	0	88.06	1	1	CAGAAAGATGATGGTGATGAAGAATTATGCAGTGTGTTTGTCCCAACAAACCACTTGTATATTGGTG	CAGAGAGACGATGGAGATGAAGAACTCTGCAGCGTTTTTGTCCCAACAAACCACTTATATATTGGTG	69	792	NC_026153.1_-_XP_011090446.1 Sesamum indicum cultivar Zhongzhi No. 13 linkage group LG9, S_indicum_v1.0, whole genome shotgun sequence	protein LIKE COV 2
	442	NC_026150.1 - XP_011083028.1	94	50	3	0	1	50	2418	2467	1.09e-14	77.9	NC_026150.1_-_XP_011083028.1	85	47	47	0	94	1	1	TGCAGAAAGATTCAACTTGCATAACCAGCAATCGAAGCTCAAATACCAGT	TGCAGAAAGATTCAACTTGCACAACCAGCAATCAAAGCTCAAATATCAGT	69	3672	NC_026150.1_-_XP_011083028.1 Sesamum indicum cultivar Zhongzhi No. 13 linkage group LG6, S_indicum_v1.0, whole genome shotgun sequence	structural maintenance of chromosomes protein 1
	457	NC_026145.1 - XP_011091911.1	91.304	69	6	0	1	69	491	559	3.32e-21	98.7	NC_026145.1_-_XP_011091911.1	108	63	63	0	91.3	1	1	TGCAGAAAGCATTGAAAGATTTAGAAGTTGCACGACTAAGCAGTACAATGTTTGAGGAAAAAGCTCAGA	TGCAGAAGGCATTGAAAGATTTGGAAGTTGCAAGGCTAAACAGTACAATGTTTGAGGAAAAGGCTCAGA	69	3609	NC_026145.1_-_XP_011091911.1 Sesamum indicum cultivar Zhongzhi No. 13 linkage group LG1, S_indicum_v1.0, whole genome shotgun sequence	K( ) efflux antiporter 2, chloroplastic
	459	NC_026152.1 - XP_011086861.1	88.406	69	8	0	1	69	529	461	1.72e-18	89.7	NC_026152.1_-_XP_011086861.1	98	61	61	0	88.41	1	-1	TGCAGAAAGCCACACGAGCAGTGGACAGATACAGAGTTCCAGCCACAGGGCCAGTTGTTGTGGAAAGGT	TGCAGAAAGCCACGCGCGCAGTCGAGAGATAGAGGGTTCCAGCAACAGGACCAGTTGTTGTGGAAAGGT	69	798	NC_026152.1_-_XP_011086861.1 Sesamum indicum cultivar Zhongzhi No. 13 linkage group LG8, S_indicum_v1.0, whole genome shotgun sequence	GEM-like protein 5
	460	NC_026146.1 - XP_011099002.1	91.176	68	6	0	1	68	992	925	1.16e-20	96.9	NC_026146.1_-_XP_011099002.1	106	62	62	0	91.18	1	-1	TGCAGAAAGCCACCCACTTTGTTCAAAGTGACAAATGATACTGTGTTCTCATCATTGTATTTGTAGTC	TGCAGAAAACCACTCACCTTGTTCAAAGTGACAAACGACACTGTGTTTTCATCATTGTATTTGTAGTC	69	1176	NC_026146.1_-_XP_011099002.1 Sesamum indicum cultivar Zhongzhi No. 13 linkage group LG2, S_indicum_v1.0, whole genome shotgun sequence	elongation factor 1-gamma 2-like
	460	NC_026147.1 - XP_011074970.1	89.231	65	7	0	1	65	998	934	2.1e-17	86.9	NC_026147.1_-_XP_011074970.1	95	58	58	0	89.23	1	-1	TGCAGAAAGCCACCCACTTTGTTCAAAGTGACAAATGATACTGTGTTCTCATCATTGTATTTGTA	TGCAGAAAACCACTCACCTTGTTCAAAGTAACAAATGAGACGGTGTTTTCATCATTGTATTTGTA	69	1235	NC_026147.1_-_XP_011074970.1 Sesamum indicum cultivar Zhongzhi No. 13 linkage group LG3, S_indicum_v1.0, whole genome shotgun sequence	elongation factor 1-gamma-like
	472	NC_026152.1 - XP_020551764.1	91.176	68	6	0	1	68	1322	1389	1.16e-20	96.9	NC_026152.1_-_XP_020551764.1	106	62	62	0	91.18	1	1	TGCAGAAAGCTAGAGGGAGGGGTAAAAGTAGAAAAGCTGGAGGCTTGACAACTATCCAGCTACCAAGT	TGCGGAAAGCTAGTGGGAGGGGTAAAAGTAGAAAAGCTGGAGGTTTGACAACTATTCAGCTCCCGAGT	69	4234	NC_026152.1_-_XP_020551764.1 Sesamum indicum cultivar Zhongzhi No. 13 linkage group LG8, S_indicum_v1.0, whole genome shotgun sequence	DExH-box ATP-dependent RNA helicase DExH7, chloroplastic
	472	NC_026152.1 - XP_011087692.1	91.176	68	6	0	1	68	1322	1389	1.16e-20	96.9	NC_026152.1_-_XP_011087692.1	106	62	62	0	91.18	1	1	TGCAGAAAGCTAGAGGGAGGGGTAAAAGTAGAAAAGCTGGAGGCTTGACAACTATCCAGCTACCAAGT	TGCGGAAAGCTAGTGGGAGGGGTAAAAGTAGAAAAGCTGGAGGTTTGACAACTATTCAGCTCCCGAGT	69	4234	NC_026152.1_-_XP_011087692.1 Sesamum indicum cultivar Zhongzhi No. 13 linkage group LG8, S_indicum_v1.0, whole genome shotgun sequence	DExH-box ATP-dependent RNA helicase DExH7, chloroplastic
	477	NC_026145.1 - XP_011077388.1	89.583	48	5	0	6	53	1018	1065	6.86e-11	65.3	NC_026145.1_-_XP_011077388.1	71	43	43	0	89.58	1	1	AAAGCTGAAGCTCTCAGAACTAATCTAGAGAGGAAGGAAAAGGAGTTA	AAAGCTGAATCTCTCACAAGTAATCTAGAGATGAAGGAGAAGGAGTTA	69	3540	NC_026145.1_-_XP_011077388.1 Sesamum indicum cultivar Zhongzhi No. 13 linkage group LG1, S_indicum_v1.0, whole genome shotgun sequence	protein CROWDED NUCLEI 2
	478	NC_026147.1 - XP_011071901.1	86.765	68	9	0	1	68	1504	1571	2.56e-16	83.3	NC_026147.1_-_XP_011071901.1	91	59	59	0	86.76	1	1	TGCAGAAAGCTTCAAAGATTGGTTCTTGCTGATAACAAGCTATCTGGGTCAATCCCATCGACATTCGG	TGCAGAAAGCTTCAAAGACTGGTCTTGGCTGATAACAAGCTCTCTGGATCAGTGCCATCAACATTCGG	69	2931	NC_026147.1_-_XP_011071901.1 Sesamum indicum cultivar Zhongzhi No. 13 linkage group LG3, S_indicum_v1.0, whole genome shotgun sequence	LRR receptor-like serine/threonine-protein kinase GSO1
	481	NC_026148.1 - XP_011075434.1	89.831	59	6	0	3	61	1858	1916	8.92e-16	80.6	NC_026148.1_-_XP_011075434.1	88	53	53	0	89.83	1	1	CAGAAAGCTTTGTTTGATGAAGGTTGTATCTATGTTGGTGTACCTCCTCTATATAAGGT	CAGAGAGCTTTATTTGATGAAGGTTGTATCTATGTTGGTGTTCCACCCTTATATAAGGT	69	2220	NC_026148.1_-_XP_011075434.1 Sesamum indicum cultivar Zhongzhi No. 13 linkage group LG4, S_indicum_v1.0, whole genome shotgun sequence	DNA gyrase subunit B, chloroplastic/mitochondrial isoform X2
	481	NC_026148.1 - XP_020548937.1	89.831	59	6	0	3	61	1759	1817	8.92e-16	80.6	NC_026148.1_-_XP_020548937.1	88	53	53	0	89.83	1	1	CAGAAAGCTTTGTTTGATGAAGGTTGTATCTATGTTGGTGTACCTCCTCTATATAAGGT	CAGAGAGCTTTATTTGATGAAGGTTGTATCTATGTTGGTGTTCCACCCTTATATAAGGT	69	2121	NC_026148.1_-_XP_020548937.1 Sesamum indicum cultivar Zhongzhi No. 13 linkage group LG4, S_indicum_v1.0, whole genome shotgun sequence	DNA gyrase subunit B, chloroplastic/mitochondrial isoform X2
	487	NC_026145.1 - XP_011090274.1	81.159	69	13	0	1	69	462	394	1.96e-11	67.1	NC_026145.1_-_XP_011090274.1	73	56	56	0	81.16	1	-1	TGCAGAAAGGACCACCGTGAAAACCCACTCTCCAGCCAGTAGCACTCCTCCAGCAAAAACTCCAATACC	TGCAGCAAGGGCCACAGTGAAAACCCATCCCCCAGCCAACACTACTCCTCCAACAGAAATTCCAATACC	69	1251	NC_026145.1_-_XP_011090274.1 Sesamum indicum cultivar Zhongzhi No. 13 linkage group LG1, S_indicum_v1.0, whole genome shotgun sequence	phosphatidate cytidylyltransferase 5, chloroplastic
	489	NC_026146.1 - XP_011070448.1	87.5	56	7	0	1	56	687	632	1.61e-12	70.7	NC_026146.1_-_XP_011070448.1	77	49	49	0	87.5	1	-1	TGCAGAAAGGCCCCTGCTTTCTGTTCCAACAACTTCACCCAGGGCAAGCAACTCCT	TGCAGAGAGACCCCTACTTTCTGTACCAACAACATCACCTAGTGCAAGCAACTCCT	69	912	NC_026146.1_-_XP_011070448.1 Sesamum indicum cultivar Zhongzhi No. 13 linkage group LG2, S_indicum_v1.0, whole genome shotgun sequence	E3 ubiquitin ligase BIG BROTHER-related
	492	NC_026151.1 - XP_011084706.1	86.957	69	9	0	1	69	1074	1142	7.32e-17	85.1	NC_026151.1_-_XP_011084706.1	93	60	60	0	86.96	1	1	TGCAGAAAGGGAAGGACTTTCACGCATAACAACTGTTGTTCCTGGAACAGATGAAAGCATTAGCAAATT	TGCAGAAACAGAAGGGATTTCACGCATAACGACTGTTGTCGCTGGAACAGATGAAAGTATTGGCAAATT	69	1482	NC_026151.1_-_XP_011084706.1 Sesamum indicum cultivar Zhongzhi No. 13 linkage group LG7, S_indicum_v1.0, whole genome shotgun sequence	acetolactate synthase small subunit 1, chloroplastic isoform X2
	492	NC_026151.1 - XP_011084704.1	86.957	69	9	0	1	69	1074	1142	7.32e-17	85.1	NC_026151.1_-_XP_011084704.1	93	60	60	0	86.96	1	1	TGCAGAAAGGGAAGGACTTTCACGCATAACAACTGTTGTTCCTGGAACAGATGAAAGCATTAGCAAATT	TGCAGAAACAGAAGGGATTTCACGCATAACGACTGTTGTCGCTGGAACAGATGAAAGTATTGGCAAATT	69	1482	NC_026151.1_-_XP_011084704.1 Sesamum indicum cultivar Zhongzhi No. 13 linkage group LG7, S_indicum_v1.0, whole genome shotgun sequence	acetolactate synthase small subunit 1, chloroplastic isoform X2
	522	NC_026159.1 - XP_011099474.1	88.71	62	6	1	1	62	729	789	1.09e-14	77.9	NC_026159.1_-_XP_011099474.1	85	55	55	1	88.71	1	1	TGCAGAAAGTGCCAGAGAAGGCATTCTTAGCATATGGGATACAGCAGATATTATTACAGATC	TGCAGAAAGTGCTAGAGAAGGCATCCTTAGCATTTGGGATACCGCTGATATAATTA-AGATC	69	1176	NC_026159.1_-_XP_011099474.1 Sesamum indicum cultivar Zhongzhi No. 13 linkage group LG15, S_indicum_v1.0, whole genome shotgun sequence	probable fructokinase-6, chloroplastic
	531	NC_026159.1 - XP_011098774.1	88.406	69	8	0	1	69	488	556	1.72e-18	89.7	NC_026159.1_-_XP_011098774.1	98	61	61	0	88.41	1	1	TGCAGAAAGTTATGTGTGCTCTGGGATTGAAGGAAGGATTGGAAGTGGAGAATTGCAGGAGAATGATTG	TGCAGAAGGTTCTCTCTGCTCTGGGATTGAAGGAAGGATCAGAAATGGAGAACTGCAGGAGAATGATTG	69	633	NC_026159.1_-_XP_011098774.1 Sesamum indicum cultivar Zhongzhi No. 13 linkage group LG15, S_indicum_v1.0, whole genome shotgun sequence	probable calcium-binding protein CML45
	531	NC_026152.1 - XP_011085859.1	84.058	69	11	0	1	69	449	517	3.79e-14	76.1	NC_026152.1_-_XP_011085859.1	83	58	58	0	84.06	1	1	TGCAGAAAGTTATGTGTGCTCTGGGATTGAAGGAAGGATTGGAAGTGGAGAATTGCAGGAGAATGATTG	TGCAAAAGGTTCTCTGTGCTCTGGGCTTAAAGGAAGGATCAGAGATGGAGAACTGCAGGAGAATGATTG	69	594	NC_026152.1_-_XP_011085859.1 Sesamum indicum cultivar Zhongzhi No. 13 linkage group LG8, S_indicum_v1.0, whole genome shotgun sequence	probable calcium-binding protein CML45
	535	NC_026150.1 - XP_011082710.1	85.938	64	9	0	5	68	390	453	3.79e-14	76.1	NC_026150.1_-_XP_011082710.1	83	55	55	0	85.94	1	1	GAAAGTTCATCATGCAGGAGAACCTATGCCTGGTGAAGAGCAAGAGGACATAGTAATGACCAGC	GAATGTACATCACGCAGGACAGCCTATGCCAGGTGAAGAGCAGGAAGACATAGTTATGACCAGC	69	759	NC_026150.1_-_XP_011082710.1 Sesamum indicum cultivar Zhongzhi No. 13 linkage group LG6, S_indicum_v1.0, whole genome shotgun sequence	E3 SUMO-protein ligase MMS21
	541	NC_026152.1 - XP_011086898.2	86.957	69	9	0	1	69	2058	2126	7.32e-17	85.1	NC_026152.1_-_XP_011086898.2	93	60	60	0	86.96	1	1	TGCAGAAATAACTCGTCTTGGCTTGTTAGCGGAACCTATGCTGTCTCTGGATGCAATTGCCATGCACAT	TGCAGAAATAAATCGTCTTGGCTTGTTAACTGAACCTATGCCATCCTTGGATGCCATTGCCATGCATAT	69	3243	NC_026152.1_-_XP_011086898.2 Sesamum indicum cultivar Zhongzhi No. 13 linkage group LG8, S_indicum_v1.0, whole genome shotgun sequence	retinoblastoma-related protein isoform X3
	541	NC_026152.1 - XP_011086897.2	86.957	69	9	0	1	69	2055	2123	7.32e-17	85.1	NC_026152.1_-_XP_011086897.2	93	60	60	0	86.96	1	1	TGCAGAAATAACTCGTCTTGGCTTGTTAGCGGAACCTATGCTGTCTCTGGATGCAATTGCCATGCACAT	TGCAGAAATAAATCGTCTTGGCTTGTTAACTGAACCTATGCCATCCTTGGATGCCATTGCCATGCATAT	69	3240	NC_026152.1_-_XP_011086897.2 Sesamum indicum cultivar Zhongzhi No. 13 linkage group LG8, S_indicum_v1.0, whole genome shotgun sequence	retinoblastoma-related protein isoform X3
	552	NC_026152.1 - XP_011088467.1	87.097	62	8	0	1	62	668	729	1.09e-14	77	NC_026152.1_-_XP_011088467.1	84	54	54	0	87.1	1	1	TGCAGAAATACGAAGCTACAATGAGACGCGAACGAGCATTAGCTTATTCATACACTCATCAG	TGCATAAGTATGAAGCTGCAATGAGACGTGAAAGAGCACTGGCTTATTCATACACTCATCAG	69	1425	NC_026152.1_-_XP_011088467.1 Sesamum indicum cultivar Zhongzhi No. 13 linkage group LG8, S_indicum_v1.0, whole genome shotgun sequence	protein IQ-DOMAIN 1
	552	NC_026154.1 - XP_011092836.1	83.871	62	10	0	1	62	677	738	5.63e-12	68	NC_026154.1_-_XP_011092836.1	74	52	52	0	83.87	1	1	TGCAGAAATACGAAGCTACAATGAGACGCGAACGAGCATTAGCTTATTCATACACTCATCAG	TGCAGAAGTATGAAGCTGCAATGAGGCGAGAAAGAGCTCTAGCTTATTCATATACTCACCAG	69	1413	NC_026154.1_-_XP_011092836.1 Sesamum indicum cultivar Zhongzhi No. 13 linkage group LG10, S_indicum_v1.0, whole genome shotgun sequence	protein IQ-DOMAIN 1-like isoform X2
	555	NC_026145.1 - XP_011075785.1	85.507	69	10	0	1	69	774	842	8.92e-16	80.6	NC_026145.1_-_XP_011075785.1	88	59	59	0	85.51	1	1	TGCAGAAATACTTGTTGATTTTCGTGATATTTCAGTCAACAAGAATGAAAGTGAAAGTGTTGGCGAGAA	TGCAGAGATACTTGTTGATTTTAATGATTTTTCAGTCAACAAGAAGGCAACAGCAAGTATTGGCGAGAA	69	1569	NC_026145.1_-_XP_011075785.1 Sesamum indicum cultivar Zhongzhi No. 13 linkage group LG1, S_indicum_v1.0, whole genome shotgun sequence	sulfhydryl oxidase 2-like
	584	NC_026160.1 - XP_020555072.1	87.097	62	8	0	1	62	652	591	1.09e-14	77	NC_026160.1_-_XP_020555072.1	84	54	54	0	87.1	1	-1	TGCAGAAATCAATGACAACATACAAATGAGAACTCCCATTTTTCAGGCTCTCGCGTTCCTTA	TGCAGAAGTCAACAACAACATACAAATGGGAACTCCCATTTTTAATGCTTTCACGTTCCTTA	69	2448	NC_026160.1_-_XP_020555072.1 Sesamum indicum cultivar Zhongzhi No. 13 linkage group LG16, S_indicum_v1.0, whole genome shotgun sequence	phosphatidylinositol 3-kinase, root isoform isoform X2
	584	NC_026160.1 - XP_011100557.1	87.097	62	8	0	1	62	652	591	1.09e-14	77	NC_026160.1_-_XP_011100557.1	84	54	54	0	87.1	1	-1	TGCAGAAATCAATGACAACATACAAATGAGAACTCCCATTTTTCAGGCTCTCGCGTTCCTTA	TGCAGAAGTCAACAACAACATACAAATGGGAACTCCCATTTTTAATGCTTTCACGTTCCTTA	69	2448	NC_026160.1_-_XP_011100557.1 Sesamum indicum cultivar Zhongzhi No. 13 linkage group LG16, S_indicum_v1.0, whole genome shotgun sequence	phosphatidylinositol 3-kinase, root isoform isoform X2
	586	NC_026153.1 - XP_011090020.1	95.455	66	3	0	1	66	627	562	2.24e-23	106	NC_026153.1_-_XP_011090020.1	117	63	63	0	95.45	1	-1	TGCAGAAATCACTGTATCGTATTCATGGTTGTACTTCATAGATTTTATTGGTCCCAGGTGTATCTG	TGCAGAAATCACAGTATCGTATTCATGGTTGTACTTCATACATTTTATTGGACCCAGGTGTATCTG	69	1836	NC_026153.1_-_XP_011090020.1 Sesamum indicum cultivar Zhongzhi No. 13 linkage group LG9, S_indicum_v1.0, whole genome shotgun sequence	LOW QUALITY PROTEIN: peptidyl-prolyl cis-trans isomerase CYP71
	590	NC_026155.1 - XP_011094444.1	95.455	66	3	0	2	67	1374	1309	2.24e-23	106	NC_026155.1_-_XP_011094444.1	117	63	63	0	95.45	1	-1	GCAGAAATCCAAGAAGCCCATGAACTCATGGTTGTTTATCATCTTGATGCTTTTCTCTATCCCAAT	GCAGAAGTCCAAGAATCCCATGAACTCATGGTTGTTTATCATCTTGATGCTTTTCTCTATTCCAAT	69	1386	NC_026155.1_-_XP_011094444.1 Sesamum indicum cultivar Zhongzhi No. 13 linkage group LG11, S_indicum_v1.0, whole genome shotgun sequence	sulfite exporter TauE/SafE family protein 4
	594	NC_026152.1 - XP_011087757.1	88.235	68	8	0	2	69	2113	2180	6.01e-18	87.8	NC_026152.1_-_XP_011087757.1	96	60	60	0	88.24	1	1	GCAGAAATCGAGCTTTTTGAGGTTTACGATGTCGTTCTTTACCTTGGCATAATTGATATATTACAGGA	GCTGAAGTTGAACTTTTTGAGGTTTACGATGTTGTTCTCTACCTCGGCATAATCGATATATTACAGGA	69	2319	NC_026152.1_-_XP_011087757.1 Sesamum indicum cultivar Zhongzhi No. 13 linkage group LG8, S_indicum_v1.0, whole genome shotgun sequence	phosphatidylinositol 4-phosphate 5-kinase 8
	594	NC_026152.1 - XP_011087758.1	88.235	68	8	0	2	69	2113	2180	6.01e-18	87.8	NC_026152.1_-_XP_011087758.1	96	60	60	0	88.24	1	1	GCAGAAATCGAGCTTTTTGAGGTTTACGATGTCGTTCTTTACCTTGGCATAATTGATATATTACAGGA	GCTGAAGTTGAACTTTTTGAGGTTTACGATGTTGTTCTCTACCTCGGCATAATCGATATATTACAGGA	69	2319	NC_026152.1_-_XP_011087758.1 Sesamum indicum cultivar Zhongzhi No. 13 linkage group LG8, S_indicum_v1.0, whole genome shotgun sequence	phosphatidylinositol 4-phosphate 5-kinase 8
	597	NC_026155.1 - XP_011094444.1	92.308	65	5	0	2	66	1374	1310	4.05e-20	96	NC_026155.1_-_XP_011094444.1	105	60	60	0	92.31	1	-1	GCAGAAATCTAAGAACCCCATGAACTCATGGTTGTTTATCATCTTGATGCTCTTCTCTATCCCAA	GCAGAAGTCCAAGAATCCCATGAACTCATGGTTGTTTATCATCTTGATGCTTTTCTCTATTCCAA	69	1386	NC_026155.1_-_XP_011094444.1 Sesamum indicum cultivar Zhongzhi No. 13 linkage group LG11, S_indicum_v1.0, whole genome shotgun sequence	sulfite exporter TauE/SafE family protein 4
	606	NC_026151.1 - XP_011084783.1	81.159	69	13	0	1	69	19	87	1.96e-11	67.1	NC_026151.1_-_XP_011084783.1	73	56	56	0	81.16	1	1	TGCAGAAATCTGGGCGACCCGACAGTCGCGCCGGACGGCGCTGCCGACTCGGCCCTCACCCTCCCAACG	TGCAGAAATCTGGGCGACCCCACAGTCCGGCCCGACGGGGCGGAGAACTCGGCCCTAACCATCTCCACG	69	1050	NC_026151.1_-_XP_011084783.1 Sesamum indicum cultivar Zhongzhi No. 13 linkage group LG7, S_indicum_v1.0, whole genome shotgun sequence	quinone oxidoreductase-like protein 2 homolog
	618	NC_026153.1 - XP_011090193.2	91.304	69	6	0	1	69	309	241	3.32e-21	98.7	NC_026153.1_-_XP_011090193.2	108	63	63	0	91.3	1	-1	TGCAGAAATGAATCCGTTTTGGTCCTTGTCAAAAACACGGAAAGCTTCCTTTAGTTCCTCCTCTGAATC	TGCAGAAATGAATCCGTTCTGGTCCTTGTCAAAAACTCTGAAAGCTTCCTTGAGCTCCTCCTCAGAATC	69	567	NC_026153.1_-_XP_011090193.2 Sesamum indicum cultivar Zhongzhi No. 13 linkage group LG9, S_indicum_v1.0, whole genome shotgun sequence	calmodulin-7
	618	NC_026150.1 - XP_011080472.1	88.406	69	8	0	1	69	309	241	1.72e-18	89.7	NC_026150.1_-_XP_011080472.1	98	61	61	0	88.41	1	-1	TGCAGAAATGAATCCGTTTTGGTCCTTGTCAAAAACACGGAAAGCTTCCTTTAGTTCCTCCTCTGAATC	TGCCGAAATGAACCCATTTTGGTCCTTGTCGAAAACACGGAAAGCTTCCTTCAGCTCCTCCTCAGAGTC	69	450	NC_026150.1_-_XP_011080472.1 Sesamum indicum cultivar Zhongzhi No. 13 linkage group LG6, S_indicum_v1.0, whole genome shotgun sequence	calmodulin
	627	NC_026145.1 - XP_011084409.1	80.882	68	13	0	2	69	1774	1841	6.86e-11	65.3	NC_026145.1_-_XP_011084409.1	71	55	55	0	80.88	1	1	GCAGAAATGATCTTTTCCTTAGAACCATGGAACTCCGGTATGTACGTTCTTCTCTCCAACTTATACGC	GCTGAAATGATCTTTGCACTGGAACCATGGAATGCTGGAATGTATGTTCTTCTTTCAAACTTATATGC	69	2319	NC_026145.1_-_XP_011084409.1 Sesamum indicum cultivar Zhongzhi No. 13 linkage group LG1, S_indicum_v1.0, whole genome shotgun sequence	pentatricopeptide repeat-containing protein At4g02750
	632	NC_026154.1 - XP_011091458.1	95.652	69	3	0	1	69	2578	2646	5.27e-25	112	NC_026154.1_-_XP_011091458.1	123	66	66	0	95.65	1	1	TGCAGAAATGCAACGCCAAAAGCTGAAGAAACTAATGGATGAGCTAAATGAGGACGGTGATGGTCGTTC	TGCAGAAATGCAGCGCCAAAAGCTGAAGAAACTAATGGATGAGCTAAATGAGGACGGTGACGGTCGCTC	69	3460	NC_026154.1_-_XP_011091458.1 Sesamum indicum cultivar Zhongzhi No. 13 linkage group LG10, S_indicum_v1.0, whole genome shotgun sequence	probable manganese-transporting ATPase PDR2
	636	NC_026154.1 - XP_011092782.1	89.855	69	7	0	1	69	2190	2122	1.41e-19	94.2	NC_026154.1_-_XP_011092782.1	103	62	62	0	89.86	1	-1	TGCAGAAATGCCTTCAGGTTTCTCAAAAGCCACAAATGTTTGGGCTGGTGTATCGTAAGGAAGAGATTT	TGCAGGGACGCCTTCAGGTTTCTCAAATGCCACAAATGTTTGGGCCGGTGTATCATATGGAAGAGATTT	69	2667	NC_026154.1_-_XP_011092782.1 Sesamum indicum cultivar Zhongzhi No. 13 linkage group LG10, S_indicum_v1.0, whole genome shotgun sequence	coatomer subunit gamma-2
	636	NC_026152.1 - XP_011088382.1	87.719	57	7	0	11	67	2180	2124	4.62e-13	72.5	NC_026152.1_-_XP_011088382.1	79	50	50	0	87.72	1	-1	CCTTCAGGTTTCTCAAAAGCCACAAATGTTTGGGCTGGTGTATCGTAAGGAAGAGAT	CCTTCGGGTTTCTCAAAGGCCACAAATGTTTGTCCTGGCGTATCATAAGGGAGAGAT	69	2667	NC_026152.1_-_XP_011088382.1 Sesamum indicum cultivar Zhongzhi No. 13 linkage group LG8, S_indicum_v1.0, whole genome shotgun sequence	coatomer subunit gamma-2
	637	NC_026154.1 - XP_011092782.1	91.304	69	6	0	1	69	2190	2122	3.32e-21	98.7	NC_026154.1_-_XP_011092782.1	108	63	63	0	91.3	1	-1	TGCAGAAATGCCTTCAGGTTTCTCAAATGCCACAAATGTTTGTGCTGGTGTATCATAAGGAAGAGATTT	TGCAGGGACGCCTTCAGGTTTCTCAAATGCCACAAATGTTTGGGCCGGTGTATCATATGGAAGAGATTT	69	2667	NC_026154.1_-_XP_011092782.1 Sesamum indicum cultivar Zhongzhi No. 13 linkage group LG10, S_indicum_v1.0, whole genome shotgun sequence	coatomer subunit gamma-2
	637	NC_026152.1 - XP_011088382.1	91.228	57	5	0	11	67	2180	2124	8.92e-16	81.5	NC_026152.1_-_XP_011088382.1	89	52	52	0	91.23	1	-1	CCTTCAGGTTTCTCAAATGCCACAAATGTTTGTGCTGGTGTATCATAAGGAAGAGAT	CCTTCGGGTTTCTCAAAGGCCACAAATGTTTGTCCTGGCGTATCATAAGGGAGAGAT	69	2667	NC_026152.1_-_XP_011088382.1 Sesamum indicum cultivar Zhongzhi No. 13 linkage group LG8, S_indicum_v1.0, whole genome shotgun sequence	coatomer subunit gamma-2
	638	NC_026154.1 - XP_011092782.1	91.304	69	6	0	1	69	2190	2122	3.32e-21	98.7	NC_026154.1_-_XP_011092782.1	108	63	63	0	91.3	1	-1	TGCAGAAATGCCTTCAGGTTTCTCAAATGCCACAAATGTTTGTGCTGGTGTATCATAAGGAAGAGATTT	TGCAGGGACGCCTTCAGGTTTCTCAAATGCCACAAATGTTTGGGCCGGTGTATCATATGGAAGAGATTT	69	2667	NC_026154.1_-_XP_011092782.1 Sesamum indicum cultivar Zhongzhi No. 13 linkage group LG10, S_indicum_v1.0, whole genome shotgun sequence	coatomer subunit gamma-2
	638	NC_026152.1 - XP_011088382.1	91.228	57	5	0	11	67	2180	2124	8.92e-16	81.5	NC_026152.1_-_XP_011088382.1	89	52	52	0	91.23	1	-1	CCTTCAGGTTTCTCAAATGCCACAAATGTTTGTGCTGGTGTATCATAAGGAAGAGAT	CCTTCGGGTTTCTCAAAGGCCACAAATGTTTGTCCTGGCGTATCATAAGGGAGAGAT	69	2667	NC_026152.1_-_XP_011088382.1 Sesamum indicum cultivar Zhongzhi No. 13 linkage group LG8, S_indicum_v1.0, whole genome shotgun sequence	coatomer subunit gamma-2
	645	NC_026155.1 - XP_020553242.1	87.719	57	7	0	1	57	338	394	4.62e-13	72.5	NC_026155.1_-_XP_020553242.1	79	50	50	0	87.72	1	1	TGCAGAAATGCTTGGCTTTTAGTGTAGATGGAACTAGGTTTGCTGCTGGTGGAGTTG	TGCAAAAATGTTTAGCTTTTAGTGTTGATGGAACGAGATTTGCTACTGGTGGAGTTG	69	1155	NC_026155.1_-_XP_020553242.1 Sesamum indicum cultivar Zhongzhi No. 13 linkage group LG11, S_indicum_v1.0, whole genome shotgun sequence	SEC12-like protein 1
	646	NC_026148.1 - XP_011075806.1	89.552	67	7	0	3	69	1999	2065	1.72e-18	90.6	NC_026148.1_-_XP_011075806.1	99	60	60	0	89.55	1	1	CAGAAATGGAATGAAATTATTGGACAGGCACGCCATAGTGTTGATTTCTTGAAAGATCAAGATGTGA	CAGAAATGGGCTGAAATTATTGGACAGGCGCGTCAGAGTGTGGATTTCTTGAAAGATCCAGATGTGA	69	3231	NC_026148.1_-_XP_011075806.1 Sesamum indicum cultivar Zhongzhi No. 13 linkage group LG4, S_indicum_v1.0, whole genome shotgun sequence	protein EXPORTIN 1A
	646	NC_026151.1 - XP_011084609.1	88.06	67	8	0	3	69	1972	2038	2.1e-17	86	NC_026151.1_-_XP_011084609.1	94	59	59	0	88.06	1	1	CAGAAATGGAATGAAATTATTGGACAGGCACGCCATAGTGTTGATTTCTTGAAAGATCAAGATGTGA	CAGAAATGGGCTGAGATTATCGGACAGGCTCGTCAAAGTGTGGATTTCTTGAAAGATCAAGATGTGA	69	3204	NC_026151.1_-_XP_011084609.1 Sesamum indicum cultivar Zhongzhi No. 13 linkage group LG7, S_indicum_v1.0, whole genome shotgun sequence	protein EXPORTIN 1A-like isoform X2
	651	NC_026154.1 - XP_011092988.1	87.879	66	8	0	4	69	724	789	7.32e-17	84.2	NC_026154.1_-_XP_011092988.1	92	58	58	0	87.88	1	1	AGAAATGGGATCATTAGTGGGAGTAGCACTACTTCTGGATATGATTTTCTGGGGTTGAAAGGTGGA	AGTAATGGGATAATTAGTGGGAGTAGCAGTAATTCTGGGTATGATTTTCTGGGGCTGAAAACTGGA	69	822	NC_026154.1_-_XP_011092988.1 Sesamum indicum cultivar Zhongzhi No. 13 linkage group LG10, S_indicum_v1.0, whole genome shotgun sequence	myb-related protein 308-like
	652	NC_026154.1 - XP_011092988.1	87.879	66	8	0	4	69	724	789	7.32e-17	84.2	NC_026154.1_-_XP_011092988.1	92	58	58	0	87.88	1	1	AGAAATGGGATCATTAGTGGGAGTAGCACTACTTCTGGATATGATTTTCTGGGGTTGAAAGGTGGA	AGTAATGGGATAATTAGTGGGAGTAGCAGTAATTCTGGGTATGATTTTCTGGGGCTGAAAACTGGA	69	822	NC_026154.1_-_XP_011092988.1 Sesamum indicum cultivar Zhongzhi No. 13 linkage group LG10, S_indicum_v1.0, whole genome shotgun sequence	myb-related protein 308-like
	671	NC_026152.1 - XP_011086698.1	95.522	67	3	0	3	69	1393	1459	6.42e-24	108	NC_026152.1_-_XP_011086698.1	119	64	64	0	95.52	1	1	CAGAAATGTTTTGAAGATTTGGAGTACTCATATCTTGTTGACCGAGCATTGGAATGGGGGAAACAGG	CAGAAATGCTTTGAAGACTTGGAGTACTCATATCTTGTTGACCGAGCATTGGAATGGGGAAAACAGG	69	2442	NC_026152.1_-_XP_011086698.1 Sesamum indicum cultivar Zhongzhi No. 13 linkage group LG8, S_indicum_v1.0, whole genome shotgun sequence	oxysterol-binding protein-related protein 1D
	671	NC_026146.1 - XP_011071165.1	92.537	67	5	0	3	69	1378	1444	3.32e-21	99.6	NC_026146.1_-_XP_011071165.1	109	62	62	0	92.54	1	1	CAGAAATGTTTTGAAGATTTGGAGTACTCATATCTTGTTGACCGAGCATTGGAATGGGGGAAACAGG	CAGAAATGCTTTGAAGACTTGGAGTACTCTTATCTTGTCGACCGAGCATTGGAATGGGGAAAACAGG	69	2427	NC_026146.1_-_XP_011071165.1 Sesamum indicum cultivar Zhongzhi No. 13 linkage group LG2, S_indicum_v1.0, whole genome shotgun sequence	oxysterol-binding protein-related protein 1D
	704	NC_026145.1 - XP_020549695.1	89.552	67	7	0	1	67	564	630	1.72e-18	90.6	NC_026145.1_-_XP_020549695.1	99	60	60	0	89.55	1	1	TGCAGAAATTGGAATTGAGGAAGACAATATAAAGAAACACTCAACACCTGCATATAGAGCCCCTGAG	TGAAGAAATGGGAATTGAGGAAGACAATATACGGAAACACACAACACCTGCCTATAGGGCCCCTGAG	69	2091	NC_026145.1_-_XP_020549695.1 Sesamum indicum cultivar Zhongzhi No. 13 linkage group LG1, S_indicum_v1.0, whole genome shotgun sequence	probable serine/threonine-protein kinase DDB_G0280111 isoform X4
	704	NC_026145.1 - XP_011087141.1	89.552	67	7	0	1	67	564	630	1.72e-18	90.6	NC_026145.1_-_XP_011087141.1	99	60	60	0	89.55	1	1	TGCAGAAATTGGAATTGAGGAAGACAATATAAAGAAACACTCAACACCTGCATATAGAGCCCCTGAG	TGAAGAAATGGGAATTGAGGAAGACAATATACGGAAACACACAACACCTGCCTATAGGGCCCCTGAG	69	2088	NC_026145.1_-_XP_011087141.1 Sesamum indicum cultivar Zhongzhi No. 13 linkage group LG1, S_indicum_v1.0, whole genome shotgun sequence	probable serine/threonine-protein kinase DDB_G0280111 isoform X4
	714	NC_026146.1 - XP_020547473.1	80.882	68	13	0	2	69	366	433	6.86e-11	65.3	NC_026146.1_-_XP_020547473.1	71	55	55	0	80.88	1	1	GCAGAAATTTGCTCTTTCTGCAACAGAGGTTGGTTCTCTGATCAATCTGGGACGAAAAGATTCATGTG	GCAGGTATTTGCTTTGTCCGCAACAGAGGTTGGATCCTTGATCAGTTTGGGTTCAAAAGATTCATGTG	69	744	NC_026146.1_-_XP_020547473.1 Sesamum indicum cultivar Zhongzhi No. 13 linkage group LG2, S_indicum_v1.0, whole genome shotgun sequence	single-stranded DNA-bindig protein WHY2, mitochondrial isoform X2
	714	NC_026146.1 - XP_011095185.1	80.882	68	13	0	2	69	342	409	6.86e-11	65.3	NC_026146.1_-_XP_011095185.1	71	55	55	0	80.88	1	1	GCAGAAATTTGCTCTTTCTGCAACAGAGGTTGGTTCTCTGATCAATCTGGGACGAAAAGATTCATGTG	GCAGGTATTTGCTTTGTCCGCAACAGAGGTTGGATCCTTGATCAGTTTGGGTTCAAAAGATTCATGTG	69	720	NC_026146.1_-_XP_011095185.1 Sesamum indicum cultivar Zhongzhi No. 13 linkage group LG2, S_indicum_v1.0, whole genome shotgun sequence	single-stranded DNA-bindig protein WHY2, mitochondrial isoform X2
	735	NC_026152.1 - XP_011087602.1	87.5	64	8	0	6	69	3099	3036	8.92e-16	80.6	NC_026152.1_-_XP_011087602.1	88	56	56	0	87.5	1	-1	AACAACTTCAAATGAGTTGGTGATGCTGCTAAGGAAACCTTCTGCTCTGCTTTTGGTGTTACTA	AACAATTTCAAATGAATTCGTGATGCTGCTAAGAAAACCTTCTGCTCTGGTTTTAATATTACTA	69	3897	NC_026152.1_-_XP_011087602.1 Sesamum indicum cultivar Zhongzhi No. 13 linkage group LG8, S_indicum_v1.0, whole genome shotgun sequence	protein STICHEL
	736	NC_026158.1 - XP_011098333.1	90	50	5	0	1	50	1982	2031	5.63e-12	68.9	NC_026158.1_-_XP_011098333.1	75	45	45	0	90	1	1	TGCAGAACAAGAAGAAGAAGTCTCATCAGAAGAAAATAACTGGTTTCCAG	TGCAGAATAAAAAGAAGAAATCTCATCAGAAGAAAATAACAGGATTCCAG	69	2730	NC_026158.1_-_XP_011098333.1 Sesamum indicum cultivar Zhongzhi No. 13 linkage group LG14, S_indicum_v1.0, whole genome shotgun sequence	WD repeat-containing protein 44 isoform X2
	736	NC_026158.1 - XP_011098334.1	90	50	5	0	1	50	1982	2031	5.63e-12	68.9	NC_026158.1_-_XP_011098334.1	75	45	45	0	90	1	1	TGCAGAACAAGAAGAAGAAGTCTCATCAGAAGAAAATAACTGGTTTCCAG	TGCAGAATAAAAAGAAGAAATCTCATCAGAAGAAAATAACAGGATTCCAG	69	2208	NC_026158.1_-_XP_011098334.1 Sesamum indicum cultivar Zhongzhi No. 13 linkage group LG14, S_indicum_v1.0, whole genome shotgun sequence	WD repeat-containing protein 44 isoform X2
	741	NC_026155.1 - XP_011095139.1	82.609	69	12	0	1	69	237	305	4.62e-13	71.6	NC_026155.1_-_XP_011095139.1	78	57	57	0	82.61	1	1	TGCAGAACAAGATGCACTTGCGTCTACTGAATGTGACGAACAAGAAGAGTCTAGGGGTCGCTTTGGGTC	TGCAGAACAAGATGTGCTCGAGTCTATAGAATGCGAGGGACAAGAAGAGCCAAGGAGTCGCTTTGGGTC	69	1638	NC_026155.1_-_XP_011095139.1 Sesamum indicum cultivar Zhongzhi No. 13 linkage group LG11, S_indicum_v1.0, whole genome shotgun sequence	probable serine/threonine-protein kinase PBL11
	746	NC_026157.1 - XP_011097268.1	83.824	68	11	0	2	69	414	481	1.32e-13	74.3	NC_026157.1_-_XP_011097268.1	81	57	57	0	83.82	1	1	GCAGAACAAGGCCCAGCTTGTCGTCATTGCACACGATGTTGATCCCATCGAGTTGGTTGTCTGGCTCC	GCAGAACAAAGCTCAGTTGGTGGTCATTGCTCATGATGTTGACCCAATTGAGTTGGTTGTATGGCTCC	69	771	NC_026157.1_-_XP_011097268.1 Sesamum indicum cultivar Zhongzhi No. 13 linkage group LG13, S_indicum_v1.0, whole genome shotgun sequence	60S ribosomal protein L7a-1-like
	754	NC_026159.1 - XP_011099553.1	85.507	69	10	0	1	69	719	787	8.92e-16	80.6	NC_026159.1_-_XP_011099553.1	88	59	59	0	85.51	1	1	TGCAGAACAATATAGAGACTCGGCATTCGGTTTCATTGTGCCTACTGTTTTGTCCCATTGGGATTCTTG	TGCAGAATGATGTAGAGACCCGGCATTCAGTTTCACTCTGCCTGCTGTCTTGTCCGATTGGGATTCTTG	69	825	NC_026159.1_-_XP_011099553.1 Sesamum indicum cultivar Zhongzhi No. 13 linkage group LG15, S_indicum_v1.0, whole genome shotgun sequence	protein ABA DEFICIENT 4, chloroplastic isoform X2
	754	NC_026159.1 - XP_011099554.1	85.507	69	10	0	1	69	701	769	8.92e-16	80.6	NC_026159.1_-_XP_011099554.1	88	59	59	0	85.51	1	1	TGCAGAACAATATAGAGACTCGGCATTCGGTTTCATTGTGCCTACTGTTTTGTCCCATTGGGATTCTTG	TGCAGAATGATGTAGAGACCCGGCATTCAGTTTCACTCTGCCTGCTGTCTTGTCCGATTGGGATTCTTG	69	807	NC_026159.1_-_XP_011099554.1 Sesamum indicum cultivar Zhongzhi No. 13 linkage group LG15, S_indicum_v1.0, whole genome shotgun sequence	protein ABA DEFICIENT 4, chloroplastic isoform X2
	758	NC_026152.1 - XP_020551830.1	85.075	67	10	0	1	67	314	380	1.09e-14	77	NC_026152.1_-_XP_020551830.1	84	57	57	0	85.07	1	1	TGCAGAACAATGAGATTGCTGGTTCTATTCCAGCTGTCATTGGGAAGTTAGATAAACTTCAGACGCT	TGCAGAACAATGAGATTATGGGTGCTATTCCTCCTGTAATCGGGAAGTTAGAAAAGCTTCAGACGCT	69	1878	NC_026152.1_-_XP_020551830.1 Sesamum indicum cultivar Zhongzhi No. 13 linkage group LG8, S_indicum_v1.0, whole genome shotgun sequence	protein NSP-INTERACTING KINASE 3
	759	NC_026152.1 - XP_020551830.1	85.075	67	10	0	1	67	314	380	1.09e-14	77	NC_026152.1_-_XP_020551830.1	84	57	57	0	85.07	1	1	TGCAGAACAATGAGATTGCTGGTTCTATTCCAGCTGTCATTGGGAAGTTAGATAAACTTCAGACGCT	TGCAGAACAATGAGATTATGGGTGCTATTCCTCCTGTAATCGGGAAGTTAGAAAAGCTTCAGACGCT	69	1878	NC_026152.1_-_XP_020551830.1 Sesamum indicum cultivar Zhongzhi No. 13 linkage group LG8, S_indicum_v1.0, whole genome shotgun sequence	protein NSP-INTERACTING KINASE 3
	777	NC_026146.1 - XP_011100175.1	86.765	68	9	0	1	68	611	544	2.56e-16	83.3	NC_026146.1_-_XP_011100175.1	91	59	59	0	86.76	1	-1	TGCAGAACACGTTTAGCCTCAAGCATTTTCCCTTTACTCACTAGCCACCGAGGAGACTCAGGCAAATA	TGCAAGACTCGTTTGGCCTCAAGCATCTTTCCTTTACTTACTAGCCATCGAGGAGATTCAGGCAAATA	69	2223	NC_026146.1_-_XP_011100175.1 Sesamum indicum cultivar Zhongzhi No. 13 linkage group LG2, S_indicum_v1.0, whole genome shotgun sequence	monosaccharide-sensing protein 2
	777	NC_026147.1 - XP_020548631.1	83.824	68	11	0	1	68	611	544	1.32e-13	74.3	NC_026147.1_-_XP_020548631.1	81	57	57	0	83.82	1	-1	TGCAGAACACGTTTAGCCTCAAGCATTTTCCCTTTACTCACTAGCCACCGAGGAGACTCAGGCAAATA	TGTAGAACTTGTTTTGCCTCAAGCATTCTTCCTTTACTTACGAGCCATCGAGGAGATTCAGGTAAATA	69	2220	NC_026147.1_-_XP_020548631.1 Sesamum indicum cultivar Zhongzhi No. 13 linkage group LG3, S_indicum_v1.0, whole genome shotgun sequence	monosaccharide-sensing protein 2
	779	NC_026152.1 - XP_011087185.1	89.552	67	7	0	1	67	8	74	1.72e-18	90.6	NC_026152.1_-_XP_011087185.1	99	60	60	0	89.55	1	1	TGCAGAACACTGTGAAAGAAGCCCTAAATGCGCTCTACCATCATCCCGAGGACGCCGTGAGGATGCA	TGCAGAACACTGTGAAAGAAGCCCTAAACGCGCTGTACCACCATCCGGACGACGCCGTACGGATGCA	69	2880	NC_026152.1_-_XP_011087185.1 Sesamum indicum cultivar Zhongzhi No. 13 linkage group LG8, S_indicum_v1.0, whole genome shotgun sequence	transportin MOS14
	795	NC_026154.1 - XP_011092399.1	90	50	5	0	1	50	782	733	5.63e-12	68.9	NC_026154.1_-_XP_011092399.1	75	45	45	0	90	1	-1	TGCAGAACAGCAAAGCCGCTCCTTATATTCTGCAAGATTTGGCTGTCGAA	TGCAGCACAGCAAAGCCGCTCCTGATGTTCTGCAGGATTTGGATGTCGAA	69	936	NC_026154.1_-_XP_011092399.1 Sesamum indicum cultivar Zhongzhi No. 13 linkage group LG10, S_indicum_v1.0, whole genome shotgun sequence	peroxidase 43-like
	798	NC_026154.1 - XP_020552813.1	87.097	62	8	0	3	64	1606	1667	1.09e-14	77	NC_026154.1_-_XP_020552813.1	84	54	54	0	87.1	1	1	CAGAACAGGAGGCTTATGGGCCTTCAGCTTCTTGACATCAAGAGGAACAGCCACCACCGTAC	CAAAACAGGAGACTTATGGGTCTACAGCTTCTTGATGTTAAGAGGAACAGCCACCACCGCAC	69	2163	NC_026154.1_-_XP_020552813.1 Sesamum indicum cultivar Zhongzhi No. 13 linkage group LG10, S_indicum_v1.0, whole genome shotgun sequence	zinc finger CCCH domain-containing protein 53
	798	NC_026154.1 - XP_011091786.1	87.097	62	8	0	3	64	1606	1667	1.09e-14	77	NC_026154.1_-_XP_011091786.1	84	54	54	0	87.1	1	1	CAGAACAGGAGGCTTATGGGCCTTCAGCTTCTTGACATCAAGAGGAACAGCCACCACCGTAC	CAAAACAGGAGACTTATGGGTCTACAGCTTCTTGATGTTAAGAGGAACAGCCACCACCGCAC	69	2163	NC_026154.1_-_XP_011091786.1 Sesamum indicum cultivar Zhongzhi No. 13 linkage group LG10, S_indicum_v1.0, whole genome shotgun sequence	zinc finger CCCH domain-containing protein 53
	799	NC_026154.1 - XP_020552813.1	87.097	62	8	0	3	64	1606	1667	1.09e-14	77	NC_026154.1_-_XP_020552813.1	84	54	54	0	87.1	1	1	CAGAACAGGAGGCTTATGGGCCTTCAGCTTCTTGACATCAAGAGGAACAGCCACCACCGTAC	CAAAACAGGAGACTTATGGGTCTACAGCTTCTTGATGTTAAGAGGAACAGCCACCACCGCAC	69	2163	NC_026154.1_-_XP_020552813.1 Sesamum indicum cultivar Zhongzhi No. 13 linkage group LG10, S_indicum_v1.0, whole genome shotgun sequence	zinc finger CCCH domain-containing protein 53
	799	NC_026154.1 - XP_011091786.1	87.097	62	8	0	3	64	1606	1667	1.09e-14	77	NC_026154.1_-_XP_011091786.1	84	54	54	0	87.1	1	1	CAGAACAGGAGGCTTATGGGCCTTCAGCTTCTTGACATCAAGAGGAACAGCCACCACCGTAC	CAAAACAGGAGACTTATGGGTCTACAGCTTCTTGATGTTAAGAGGAACAGCCACCACCGCAC	69	2163	NC_026154.1_-_XP_011091786.1 Sesamum indicum cultivar Zhongzhi No. 13 linkage group LG10, S_indicum_v1.0, whole genome shotgun sequence	zinc finger CCCH domain-containing protein 53
	800	NC_026150.1 - XP_020550371.1	86.567	67	9	0	1	67	1538	1604	8.92e-16	81.5	NC_026150.1_-_XP_020550371.1	89	58	58	0	86.57	1	1	TGCAGAACAGGGCTCAACTTTTGAAGGTTGCTGAGACCGAAAAACAGAGTTTGCTAGATGATGTTCT	TGCAGAGCAGGGTGCAACTCTTGAAGGTTGCAGAGACCCAAAATCAGAGTTTGCAAGATGAAGTTCT	69	5283	NC_026150.1_-_XP_020550371.1 Sesamum indicum cultivar Zhongzhi No. 13 linkage group LG6, S_indicum_v1.0, whole genome shotgun sequence	protein NETWORKED 1D
	800	NC_026150.1 - XP_011079895.1	86.567	67	9	0	1	67	1538	1604	8.92e-16	81.5	NC_026150.1_-_XP_011079895.1	89	58	58	0	86.57	1	1	TGCAGAACAGGGCTCAACTTTTGAAGGTTGCTGAGACCGAAAAACAGAGTTTGCTAGATGATGTTCT	TGCAGAGCAGGGTGCAACTCTTGAAGGTTGCAGAGACCCAAAATCAGAGTTTGCAAGATGAAGTTCT	69	5283	NC_026150.1_-_XP_011079895.1 Sesamum indicum cultivar Zhongzhi No. 13 linkage group LG6, S_indicum_v1.0, whole genome shotgun sequence	protein NETWORKED 1D
	814	NC_026148.1 - XP_011075806.1	86.957	69	9	0	1	69	854	922	7.32e-17	85.1	NC_026148.1_-_XP_011075806.1	93	60	60	0	86.96	1	1	TGCAGAACATCCTTCCATCTAATACCAACTTTGTAGAGGCTTATGCAAATGGCACTAGTGAGGAACAGG	TGCAGAATATCCTGCCACCTACTACCAACTTTTTGGAGGCTTATGCAAATGGCACAACTGAGGAGCAGG	69	3231	NC_026148.1_-_XP_011075806.1 Sesamum indicum cultivar Zhongzhi No. 13 linkage group LG4, S_indicum_v1.0, whole genome shotgun sequence	protein EXPORTIN 1A
	814	NC_026151.1 - XP_011084609.1	81.159	69	13	0	1	69	827	895	1.96e-11	67.1	NC_026151.1_-_XP_011084609.1	73	56	56	0	81.16	1	1	TGCAGAACATCCTTCCATCTAATACCAACTTTGTAGAGGCTTATGCAAATGGCACTAGTGAGGAACAGG	TGCAGGCCATTGTCCCACCCACTACCAACTTTCTTGAGGCTTATGCGAATGGCAATAGTGAGGAGCAGG	69	3204	NC_026151.1_-_XP_011084609.1 Sesamum indicum cultivar Zhongzhi No. 13 linkage group LG7, S_indicum_v1.0, whole genome shotgun sequence	protein EXPORTIN 1A-like isoform X2
	815	NC_026148.1 - XP_011075806.1	85.507	69	10	0	1	69	854	922	8.92e-16	80.6	NC_026148.1_-_XP_011075806.1	88	59	59	0	85.51	1	1	TGCAGAACATCCTTCCATCTACTACTAACTTTGTAGAGGCTTATGCAATTGGAACTAGTGAGGAGCAGG	TGCAGAATATCCTGCCACCTACTACCAACTTTTTGGAGGCTTATGCAAATGGCACAACTGAGGAGCAGG	69	3231	NC_026148.1_-_XP_011075806.1 Sesamum indicum cultivar Zhongzhi No. 13 linkage group LG4, S_indicum_v1.0, whole genome shotgun sequence	protein EXPORTIN 1A
	820	NC_026145.1 - XP_011069997.1	86.957	69	9	0	1	69	1311	1379	7.32e-17	85.1	NC_026145.1_-_XP_011069997.1	93	60	60	0	86.96	1	1	TGCAGAACATGAAAGGCAACAAAAAGCATTTGAGAACGAGATTGAAAGGATAACTTTGGAAGCACAGAA	TGCAGAACATGAACGGCAACAAAAAGCATTCCAGGATGAAATTGAAAGGATGGCTTTGGAAGCACAAAA	69	2760	NC_026145.1_-_XP_011069997.1 Sesamum indicum cultivar Zhongzhi No. 13 linkage group LG1, S_indicum_v1.0, whole genome shotgun sequence	kinesin-like protein KIN-UB isoform X2
	820	NC_026145.1 - XP_011070006.1	86.957	69	9	0	1	69	1311	1379	7.32e-17	85.1	NC_026145.1_-_XP_011070006.1	93	60	60	0	86.96	1	1	TGCAGAACATGAAAGGCAACAAAAAGCATTTGAGAACGAGATTGAAAGGATAACTTTGGAAGCACAGAA	TGCAGAACATGAACGGCAACAAAAAGCATTCCAGGATGAAATTGAAAGGATGGCTTTGGAAGCACAAAA	69	2757	NC_026145.1_-_XP_011070006.1 Sesamum indicum cultivar Zhongzhi No. 13 linkage group LG1, S_indicum_v1.0, whole genome shotgun sequence	kinesin-like protein KIN-UB isoform X2
	823	NC_026150.1 - XP_011082584.2	87.692	65	8	0	3	67	601	665	2.56e-16	82.4	NC_026150.1_-_XP_011082584.2	90	57	57	0	87.69	1	1	CAGAACATGGAGGTAAGGTTGCGAGGTACGGAGAAGAAGCAGCAGCAGATGATGAGATTCTTGGC	CAGCAAATGGAGTTAAGGCTGCAAGGGACAGAGAAGAAACAGCAGCAGATGATGAGATTCTTGGC	69	1107	NC_026150.1_-_XP_011082584.2 Sesamum indicum cultivar Zhongzhi No. 13 linkage group LG6, S_indicum_v1.0, whole genome shotgun sequence	heat stress transcription factor A-7a-like
	823	NC_026150.1 - XP_011079918.1	82.09	67	12	0	1	67	587	653	5.63e-12	68	NC_026150.1_-_XP_011079918.1	74	55	55	0	82.09	1	1	TGCAGAACATGGAGGTAAGGTTGCGAGGTACGGAGAAGAAGCAGCAGCAGATGATGAGATTCTTGGC	TGCAGCAAATGGAGTTGAAATTACAAGGGACAGAGAGGAAGCAGCAGCAGATGATGAGTTTCTTGGC	69	1083	NC_026150.1_-_XP_011079918.1 Sesamum indicum cultivar Zhongzhi No. 13 linkage group LG6, S_indicum_v1.0, whole genome shotgun sequence	heat stress transcription factor A-7a
	829	NC_026148.1 - XP_011075247.1	83.824	68	11	0	2	69	1572	1505	1.32e-13	74.3	NC_026148.1_-_XP_011075247.1	81	57	57	0	83.82	1	-1	GCAGAACATTACAAGTACTACATTCCCGAAATGTTTCCTCCACCGAATCAAGTTGCCTATTTCATAAT	GCAGAACATTATAAGCACCACGTTTCCAAAATTCTTCCTCCACCGTATCAAGTTCCCGATTTCATAAT	69	2301	NC_026148.1_-_XP_011075247.1 Sesamum indicum cultivar Zhongzhi No. 13 linkage group LG4, S_indicum_v1.0, whole genome shotgun sequence	probable glycosyltransferase STELLO2
	834	NC_026159.1 - XP_011098694.1	83.077	65	11	0	4	68	983	919	5.63e-12	68.9	NC_026159.1_-_XP_011098694.1	75	54	54	0	83.08	1	-1	AGAACATTTTCACGAATACTAGTATTTTTTAGGAGGCACCTAAGAACATCTTCCAACCCCTCATA	AGAACATTTTCACGGGTATTTGTATTCTTAAGAAGGCACATAAGAACTTCTGCCAACCCATCATA	69	3114	NC_026159.1_-_XP_011098694.1 Sesamum indicum cultivar Zhongzhi No. 13 linkage group LG15, S_indicum_v1.0, whole genome shotgun sequence	probable ubiquitin conjugation factor E4
	841	NC_026156.1 - XP_011095293.1	89.855	69	7	0	1	69	1731	1663	1.41e-19	94.2	NC_026156.1_-_XP_011095293.1	103	62	62	0	89.86	1	-1	TGCAGAACCAATTGCAAATCCCTTAGTCGTGGCTTTTGTAGTATTCCCAACCGCATCAAGCACATCCGT	TGCAGATCCAATTGCAAATCCTTTGGTCGTAGCTTTTGTAGTATTTCCAACCGCATCAAGAACATCAGT	69	2394	NC_026156.1_-_XP_011095293.1 Sesamum indicum cultivar Zhongzhi No. 13 linkage group LG12, S_indicum_v1.0, whole genome shotgun sequence	pyrophosphate-energized membrane proton pump 3
	843	NC_026146.1 - XP_020547395.1	90	60	6	0	10	69	1559	1618	2.56e-16	82.4	NC_026146.1_-_XP_020547395.1	90	54	54	0	90	1	1	AGACCCCTGCCACTCCCACAGAGAAGACAACTGGCGGCAAAACTTTGTTTGTTGGGAATC	AGACCCCTGCCACTCCCAAAGAGCAGACAACTGGCTCTAAAACTCTGTTTGTTGGGAATC	69	2352	NC_026146.1_-_XP_020547395.1 Sesamum indicum cultivar Zhongzhi No. 13 linkage group LG2, S_indicum_v1.0, whole genome shotgun sequence	nucleolin 2-like
	843	NC_026146.1 - XP_011070437.1	86.207	58	8	0	12	69	991	1048	1.61e-12	69.8	NC_026146.1_-_XP_011070437.1	76	50	50	0	86.21	1	1	ACCCCTGCCACTCCCACAGAGAAGACAACTGGCGGCAAAACTTTGTTTGTTGGGAATC	ACCCCTGCCACTCCCAAACAGCAGACAAGTGGTTCCAAAACTCTGTTTGTTGGGAATC	69	1708	NC_026146.1_-_XP_011070437.1 Sesamum indicum cultivar Zhongzhi No. 13 linkage group LG2, S_indicum_v1.0, whole genome shotgun sequence	nucleolin 1-like
	844	NC_026146.1 - XP_011101028.1	94.203	69	4	0	1	69	233	301	6.42e-24	107	NC_026146.1_-_XP_011101028.1	118	65	65	0	94.2	1	1	TGCAGAACCAGCGCTGGATCGCTGTCAAGAAATTTACCAAAATGGCGTGGCCTGATCCTAAACAATTTG	TGCAGAACCAGCGGTGGATCGCTGTCAAGAAATTTACCAAGATGGCGTGGCCTGATCCCAAACAGTTTG	69	1485	NC_026146.1_-_XP_011101028.1 Sesamum indicum cultivar Zhongzhi No. 13 linkage group LG2, S_indicum_v1.0, whole genome shotgun sequence	probable serine/threonine-protein kinase At4g35230
	846	NC_026147.1 - XP_011074874.1	85.294	68	10	0	1	68	791	858	3.11e-15	78.8	NC_026147.1_-_XP_011074874.1	86	58	58	0	85.29	1	1	TGCAGAACCAGTTGATGCTCTTGAAGCAAAAGCATTGGTTCCTTATGGACACATTGCGACAGTTAGAG	TGCAAAATCAATTGATGCTCTTGAAGCAGAAGTACTGGCTCCTCATGGACACACTGCGCCAGTTAGAG	69	2353	NC_026147.1_-_XP_011074874.1 Sesamum indicum cultivar Zhongzhi No. 13 linkage group LG3, S_indicum_v1.0, whole genome shotgun sequence	oxysterol-binding protein-related protein 1C-like
	850	NC_026145.1 - XP_011076402.1	84.058	69	11	0	1	69	120	52	3.79e-14	76.1	NC_026145.1_-_XP_011076402.1	83	58	58	0	84.06	1	-1	TGCAGAACCATATCTCACCGCGGGCTTCTCCATCTTCTCATTCCTCAACTCCCTATTTATGAGTGCAGC	TGCAGAGCCATATCTCACTGTTGGCCTCTCCATTTTCTCATTCTTTAACTCCCTACTGATTAGTGCAGC	69	1287	NC_026145.1_-_XP_011076402.1 Sesamum indicum cultivar Zhongzhi No. 13 linkage group LG1, S_indicum_v1.0, whole genome shotgun sequence	probable protein phosphatase 2C 15 isoform X3
	850	NC_026145.1 - XP_011076409.1	84.058	69	11	0	1	69	120	52	3.79e-14	76.1	NC_026145.1_-_XP_011076409.1	83	58	58	0	84.06	1	-1	TGCAGAACCATATCTCACCGCGGGCTTCTCCATCTTCTCATTCCTCAACTCCCTATTTATGAGTGCAGC	TGCAGAGCCATATCTCACTGTTGGCCTCTCCATTTTCTCATTCTTTAACTCCCTACTGATTAGTGCAGC	69	1287	NC_026145.1_-_XP_011076409.1 Sesamum indicum cultivar Zhongzhi No. 13 linkage group LG1, S_indicum_v1.0, whole genome shotgun sequence	probable protein phosphatase 2C 15 isoform X3
	856	NC_026154.1 - XP_011092045.1	84.746	59	9	0	7	65	2257	2315	1.96e-11	67.1	NC_026154.1_-_XP_011092045.1	73	50	50	0	84.75	1	1	ACCCACCATGATGTGGATGTAGGCAATGTTGTAGCTGATCATCTCTTGAGAATTGAAAC	ACCCACCATGATGTAGATATGGGTAATGTTGTGGCTGATCACCTTTTAAAAATTGAAAC	69	2571	NC_026154.1_-_XP_011092045.1 Sesamum indicum cultivar Zhongzhi No. 13 linkage group LG10, S_indicum_v1.0, whole genome shotgun sequence	putative pentatricopeptide repeat-containing protein At5g08490
	856	NC_026154.1 - XP_020552769.1	84.746	59	9	0	7	65	2257	2315	1.96e-11	67.1	NC_026154.1_-_XP_020552769.1	73	50	50	0	84.75	1	1	ACCCACCATGATGTGGATGTAGGCAATGTTGTAGCTGATCATCTCTTGAGAATTGAAAC	ACCCACCATGATGTAGATATGGGTAATGTTGTGGCTGATCACCTTTTAAAAATTGAAAC	69	2571	NC_026154.1_-_XP_020552769.1 Sesamum indicum cultivar Zhongzhi No. 13 linkage group LG10, S_indicum_v1.0, whole genome shotgun sequence	putative pentatricopeptide repeat-containing protein At5g08490
	862	NC_026145.1 - XP_011073062.1	92.754	69	5	0	1	69	879	947	2.73e-22	103	NC_026145.1_-_XP_011073062.1	113	64	64	0	92.75	1	1	TGCAGAACCCGAGATTCAGTATGTTGCATTGCGAAACATAAACCTTATTGTACAAAAGCGTCCCACTAT	TGCAGAACCGGAGATTCAATATGTTGCATTGCGGAACATAAACCTTATTGTCCAAAAGCGGCCCACTAT	69	2691	NC_026145.1_-_XP_011073062.1 Sesamum indicum cultivar Zhongzhi No. 13 linkage group LG1, S_indicum_v1.0, whole genome shotgun sequence	beta-adaptin-like protein C
	862	NC_026150.1 - XP_011080929.1	88.235	68	8	0	2	69	880	947	6.01e-18	87.8	NC_026150.1_-_XP_011080929.1	96	60	60	0	88.24	1	1	GCAGAACCCGAGATTCAGTATGTTGCATTGCGAAACATAAACCTTATTGTACAAAAGCGTCCCACTAT	GCAGAACCAGAGATTCAGTATGTTGCTTTACGCAACATAAACCTAATTGTGCAAAAGCGGCCTACTAT	69	2703	NC_026150.1_-_XP_011080929.1 Sesamum indicum cultivar Zhongzhi No. 13 linkage group LG6, S_indicum_v1.0, whole genome shotgun sequence	beta-adaptin-like protein B
	864	NC_026159.1 - XP_011099049.1	88.406	69	8	0	1	69	7166	7098	1.72e-18	89.7	NC_026159.1_-_XP_011099049.1	98	61	61	0	88.41	1	-1	TGCAGAACCCGGCTGGCAGCCGACTGCAACAAAGGCTCCCTATCACTCTCAAATATTGCTTCCAGCACT	TGCAGAACACGGCTGGCAGCAGCCTGTAGCAAAGGCTCCCTATCACTTTCAAAAATTGTTTCCAGCACT	69	15318	NC_026159.1_-_XP_011099049.1 Sesamum indicum cultivar Zhongzhi No. 13 linkage group LG15, S_indicum_v1.0, whole genome shotgun sequence	LOW QUALITY PROTEIN: auxin transport protein BIG
	879	NC_026155.1 - XP_011094183.1	91.837	49	4	0	1	49	1181	1133	4.62e-13	71.6	NC_026155.1_-_XP_011094183.1	78	45	45	0	91.84	1	-1	TGCAGAACCGGAGGAAAGTCGATGAACAAGACACCCTTCTTGGCATCCT	TGGAGAACTGGAGGAAAGTCAATGAACAAGACACCCTTCTTTGCATCCT	69	3447	NC_026155.1_-_XP_011094183.1 Sesamum indicum cultivar Zhongzhi No. 13 linkage group LG11, S_indicum_v1.0, whole genome shotgun sequence	ubiquitin carboxyl-terminal hydrolase 12 isoform X7
	879	NC_026149.1 - XP_011077758.1	91.837	49	4	0	1	49	1181	1133	4.62e-13	71.6	NC_026149.1_-_XP_011077758.1	78	45	45	0	91.84	1	-1	TGCAGAACCGGAGGAAAGTCGATGAACAAGACACCCTTCTTGGCATCCT	TGGAGAACTGGAGGAAAGTCAATGAACAAGACCCCCTTCTTGGCATCCT	69	3372	NC_026149.1_-_XP_011077758.1 Sesamum indicum cultivar Zhongzhi No. 13 linkage group LG5, S_indicum_v1.0, whole genome shotgun sequence	ubiquitin carboxyl-terminal hydrolase 12 isoform X2
	888	NC_026147.1 - XP_011074733.1	88.406	69	8	0	1	69	1373	1441	1.72e-18	89.7	NC_026147.1_-_XP_011074733.1	98	61	61	0	88.41	1	1	TGCAGAACCTGATGAACGAAGCAGCCATTCTTGCAGCACGACGCGACCTCAAGGAGATAAGCAAGGACG	TGCAAAACCTGATGAATGAAGCAGCCATCCTTGCAGCGCGGCGTGACCTTAAGGAAATAAGCAAGGACG	69	2112	NC_026147.1_-_XP_011074733.1 Sesamum indicum cultivar Zhongzhi No. 13 linkage group LG3, S_indicum_v1.0, whole genome shotgun sequence	ATP-dependent zinc metalloprotease FTSH, chloroplastic-like
	888	NC_026146.1 - XP_011101039.1	82.09	67	12	0	1	67	1373	1439	5.63e-12	68	NC_026146.1_-_XP_011101039.1	74	55	55	0	82.09	1	1	TGCAGAACCTGATGAACGAAGCAGCCATTCTTGCAGCACGACGCGACCTCAAGGAGATAAGCAAGGA	TGCAAAACCTGATGAATGAGGCAGCCATCCTAGCCGCAAGGCGTGACCTTAAGGAAATAAGCAAAGA	69	2112	NC_026146.1_-_XP_011101039.1 Sesamum indicum cultivar Zhongzhi No. 13 linkage group LG2, S_indicum_v1.0, whole genome shotgun sequence	ATP-dependent zinc metalloprotease FTSH, chloroplastic
	904	NC_026150.1 - XP_011081627.1	86.765	68	9	0	1	68	448	515	2.56e-16	83.3	NC_026150.1_-_XP_011081627.1	91	59	59	0	86.76	1	1	TGCAGAACGCATCTAACAGCAAATCATGAGGCGTTTCGAAATATGAAGCTTGATTTAGTGATAAATGA	TGCAGGAAGCATCTGACAGCAAATCATGAGGCTTTTTGTAACATGAAGCTTGATTTAGTCATAAACGA	69	1029	NC_026150.1_-_XP_011081627.1 Sesamum indicum cultivar Zhongzhi No. 13 linkage group LG6, S_indicum_v1.0, whole genome shotgun sequence	thermospermine synthase ACAULIS5
	906	NC_026158.1 - XP_011097932.2	86.441	59	8	0	2	60	1741	1799	4.62e-13	71.6	NC_026158.1_-_XP_011097932.2	78	51	51	0	86.44	1	1	GCAGAACGCTTCCTAAAAGTCGTGGTCGATATCCCATTTGCCTTCAAGAGGCTAGAATC	GCAGAGCGGTTTCTCAAAGTCTTGGTTGAAATCCCATTTGCCTTTAAGAGGCTAGAATC	69	2826	NC_026158.1_-_XP_011097932.2 Sesamum indicum cultivar Zhongzhi No. 13 linkage group LG14, S_indicum_v1.0, whole genome shotgun sequence	LOW QUALITY PROTEIN: formin-like protein 5
	938	NC_026150.1 - XP_011082702.2	81.159	69	13	0	1	69	1692	1624	1.96e-11	67.1	NC_026150.1_-_XP_011082702.2	73	56	56	0	81.16	1	-1	TGCAGAACTCCTTGCATTGTCGATATCCTCATCTGACTGTTGCGGTCTTGAAAATGCTTTTTGAGCATC	TGCAGAACTCCTTGCATTGTCCTCATCATCACTTGTATAGCGCGAACTTGAAAATGCTTTTTGAGCATC	69	2079	NC_026150.1_-_XP_011082702.2 Sesamum indicum cultivar Zhongzhi No. 13 linkage group LG6, S_indicum_v1.0, whole genome shotgun sequence	serine/threonine-protein kinase svkA
	945	NC_026146.1 - XP_011071072.1	91.304	69	6	0	1	69	405	337	3.32e-21	98.7	NC_026146.1_-_XP_011071072.1	108	63	63	0	91.3	1	-1	TGCAGAACTGATATTTCCCAAGGCACAGAGAGCAAGCCCAACAATATACTGGTTGGTGTGGTTTAGATC	TGCAGAACAGATATTTCCCAAGGCACATAGAGCAAGTCCAACAATATACTGATTGGTGTGATTAAGATC	69	2625	NC_026146.1_-_XP_011071072.1 Sesamum indicum cultivar Zhongzhi No. 13 linkage group LG2, S_indicum_v1.0, whole genome shotgun sequence	AP-1 complex subunit gamma-2
	945	NC_026152.1 - XP_011086531.1	86.957	69	9	0	1	69	405	337	7.32e-17	85.1	NC_026152.1_-_XP_011086531.1	93	60	60	0	86.96	1	-1	TGCAGAACTGATATTTCCCAAGGCACAGAGAGCAAGCCCAACAATATACTGGTTGGTGTGGTTTAGATC	TGCAGAACAGATGTTACCCAAGGCACATAGAGCAAGTCCAACAATATACTGGTTCGTCTGATTTAAATC	69	2634	NC_026152.1_-_XP_011086531.1 Sesamum indicum cultivar Zhongzhi No. 13 linkage group LG8, S_indicum_v1.0, whole genome shotgun sequence	AP-1 complex subunit gamma-2 isoform X2
	946	NC_026146.1 - XP_011071072.1	91.304	69	6	0	1	69	405	337	3.32e-21	98.7	NC_026146.1_-_XP_011071072.1	108	63	63	0	91.3	1	-1	TGCAGAACTGATATTTCCCAAGGCACAGAGAGCAAGCCCAACAATATACTGGTTGGTGTGGTTTAGATC	TGCAGAACAGATATTTCCCAAGGCACATAGAGCAAGTCCAACAATATACTGATTGGTGTGATTAAGATC	69	2625	NC_026146.1_-_XP_011071072.1 Sesamum indicum cultivar Zhongzhi No. 13 linkage group LG2, S_indicum_v1.0, whole genome shotgun sequence	AP-1 complex subunit gamma-2
	946	NC_026152.1 - XP_011086531.1	86.957	69	9	0	1	69	405	337	7.32e-17	85.1	NC_026152.1_-_XP_011086531.1	93	60	60	0	86.96	1	-1	TGCAGAACTGATATTTCCCAAGGCACAGAGAGCAAGCCCAACAATATACTGGTTGGTGTGGTTTAGATC	TGCAGAACAGATGTTACCCAAGGCACATAGAGCAAGTCCAACAATATACTGGTTCGTCTGATTTAAATC	69	2634	NC_026152.1_-_XP_011086531.1 Sesamum indicum cultivar Zhongzhi No. 13 linkage group LG8, S_indicum_v1.0, whole genome shotgun sequence	AP-1 complex subunit gamma-2 isoform X2
	965	NC_026149.1 - XP_011078679.1	89.474	57	6	0	13	69	1275	1219	1.09e-14	77	NC_026149.1_-_XP_011078679.1	84	51	51	0	89.47	1	-1	TGTGCTACTATCTCGAATTACAGAAGCAGTCAGACCAGCAGCTGATGAGCCTTTTCC	TGAGCTATTGTCACGAATTACGGAAGCAGTCAGACCAGCAGCGGATGAGCCTTTTCC	69	2205	NC_026149.1_-_XP_011078679.1 Sesamum indicum cultivar Zhongzhi No. 13 linkage group LG5, S_indicum_v1.0, whole genome shotgun sequence	DNA replication licensing factor MCM5
	966	NC_026148.1 - XP_011076889.1	88.406	69	8	0	1	69	2214	2146	1.72e-18	89.7	NC_026148.1_-_XP_011076889.1	98	61	61	0	88.41	1	-1	TGCAGAACTTAGAACTTCTGCTCGACGAGCATCCAATTCAGCCATTTGACCAGCTCTCAGGAAGACCTT	TGCAGTACTAAGAACTTCTGCTCTATGTGCATCCAGTTCAGCCATCTGACCAGCTCTTAGGAAGACCTT	69	4578	NC_026148.1_-_XP_011076889.1 Sesamum indicum cultivar Zhongzhi No. 13 linkage group LG4, S_indicum_v1.0, whole genome shotgun sequence	myosin-11
	966	NC_026150.1 - XP_011080292.1	92	50	4	0	20	69	2210	2161	1.32e-13	73.4	NC_026150.1_-_XP_011080292.1	80	46	46	0	92	1	-1	GCTCGACGAGCATCCAATTCAGCCATTTGACCAGCTCTCAGGAAGACCTT	GCTCGGCGGGCATCCAACTCAGCCATCTGACCAGCTCTCAGGAAGACCTT	69	4539	NC_026150.1_-_XP_011080292.1 Sesamum indicum cultivar Zhongzhi No. 13 linkage group LG6, S_indicum_v1.0, whole genome shotgun sequence	myosin-11-like
	967	NC_026152.1 - XP_011086295.1	85.075	67	10	0	1	67	917	983	1.09e-14	77	NC_026152.1_-_XP_011086295.1	84	57	57	0	85.07	1	1	TGCAGAACTTCAAGACCCAGCTGGATGAAGACCCCATTGTCCACAGGCACCTATCCGCCCTCTACGA	TGCAAAATTTTAAGACACAGCTGGAGGAAGACCCTATTGTGCATAGGCACCTATCTTCCCTCTACGA	69	1272	NC_026152.1_-_XP_011086295.1 Sesamum indicum cultivar Zhongzhi No. 13 linkage group LG8, S_indicum_v1.0, whole genome shotgun sequence	26S proteasome non-ATPase regulatory subunit 11 homolog
	972	NC_026158.1 - XP_011097871.1	86.957	69	9	0	1	69	409	341	7.32e-17	85.1	NC_026158.1_-_XP_011097871.1	93	60	60	0	86.96	1	-1	TGCAGAACTTCCCATACGAAACGCAAGCTTCACTCCATGACACAACTTGATCGCCATTGTAGGCCAAGT	TGCAGAACTTCCCATAAGAAGCACAAGCTTGGCTCCATGAAACCACTTGGTCCCCATTGTAGGCCAAGT	69	555	NC_026158.1_-_XP_011097871.1 Sesamum indicum cultivar Zhongzhi No. 13 linkage group LG14, S_indicum_v1.0, whole genome shotgun sequence	CASP-like protein 2D1 isoform X2
	972	NC_026158.1 - XP_011097872.1	86.957	69	9	0	1	69	397	329	7.32e-17	85.1	NC_026158.1_-_XP_011097872.1	93	60	60	0	86.96	1	-1	TGCAGAACTTCCCATACGAAACGCAAGCTTCACTCCATGACACAACTTGATCGCCATTGTAGGCCAAGT	TGCAGAACTTCCCATAAGAAGCACAAGCTTGGCTCCATGAAACCACTTGGTCCCCATTGTAGGCCAAGT	69	543	NC_026158.1_-_XP_011097872.1 Sesamum indicum cultivar Zhongzhi No. 13 linkage group LG14, S_indicum_v1.0, whole genome shotgun sequence	CASP-like protein 2D1 isoform X2
	973	NC_026146.1 - XP_011070353.1	88.406	69	8	0	1	69	1781	1713	1.72e-18	89.7	NC_026146.1_-_XP_011070353.1	98	61	61	0	88.41	1	-1	TGCAGAACTTCTAAGCTTATTGTTTTCTCTGCCTTCCCGCGCTTCCTCTCCGGTTTCTTGCCTGCATCT	TGCAGAACCTCTAAGCTAATTGTTTTCTCAGCCTTCCCTCGCTTTCTCTCTGGCTTCTTGCCTGTATCT	69	2970	NC_026146.1_-_XP_011070353.1 Sesamum indicum cultivar Zhongzhi No. 13 linkage group LG2, S_indicum_v1.0, whole genome shotgun sequence	protein NLP7 isoform X2
	973	NC_026146.1 - XP_011070354.1	88.406	69	8	0	1	69	1781	1713	1.72e-18	89.7	NC_026146.1_-_XP_011070354.1	98	61	61	0	88.41	1	-1	TGCAGAACTTCTAAGCTTATTGTTTTCTCTGCCTTCCCGCGCTTCCTCTCCGGTTTCTTGCCTGCATCT	TGCAGAACCTCTAAGCTAATTGTTTTCTCAGCCTTCCCTCGCTTTCTCTCTGGCTTCTTGCCTGTATCT	69	2784	NC_026146.1_-_XP_011070354.1 Sesamum indicum cultivar Zhongzhi No. 13 linkage group LG2, S_indicum_v1.0, whole genome shotgun sequence	protein NLP7 isoform X2
	976	NC_026152.1 - XP_011086379.1	85.507	69	10	0	1	69	712	644	8.92e-16	80.6	NC_026152.1_-_XP_011086379.1	88	59	59	0	85.51	1	-1	TGCAGAACTTGATTGCGTCGTATCCGATGGCGCTTGGCCAGCCAAACATGAATACCAAATTGTAGATGG	TGCAAAACTGAATTGCGTCATACCCGGTGGCATTTGGCCAGCCAAACATGAATATCATATTGTAGATGG	69	999	NC_026152.1_-_XP_011086379.1 Sesamum indicum cultivar Zhongzhi No. 13 linkage group LG8, S_indicum_v1.0, whole genome shotgun sequence	UDP-galactose/UDP-glucose transporter 3
	976	NC_026148.1 - XP_011075466.1	81.159	69	13	0	1	69	619	551	1.96e-11	67.1	NC_026148.1_-_XP_011075466.1	73	56	56	0	81.16	1	-1	TGCAGAACTTGATTGCGTCGTATCCGATGGCGCTTGGCCAGCCAAACATGAATACCAAATTGTAGATGG	TGCAAAATTGAATTGCATCATACCCAGTGGCATTTGGCCAGCCAAACATGAATATCATATTGTAGATGG	69	906	NC_026148.1_-_XP_011075466.1 Sesamum indicum cultivar Zhongzhi No. 13 linkage group LG4, S_indicum_v1.0, whole genome shotgun sequence	UDP-galactose/UDP-glucose transporter 3 isoform X2
	1009	NC_026145.1 - XP_020554889.1	87.692	65	8	0	5	69	5644	5708	2.56e-16	82.4	NC_026145.1_-_XP_020554889.1	90	57	57	0	87.69	1	1	GAAGAACAAGATGTTCTATTGGAGATTGAACAAATTATGAAGAACATCAGAAGAGTAATGCATCA	GAAGAACAAGATGCTCTTTCAGAGATTGAACCAATTATGAAGAACATCAGAAAAATAATGAATCA	69	6321	NC_026145.1_-_XP_020554889.1 Sesamum indicum cultivar Zhongzhi No. 13 linkage group LG1, S_indicum_v1.0, whole genome shotgun sequence	DNA-directed RNA polymerase V subunit 1
	1015	NC_026154.1 - XP_011091480.1	89.583	48	5	0	1	48	518	565	6.86e-11	65.3	NC_026154.1_-_XP_011091480.1	71	43	43	0	89.58	1	1	TGCAGAAGAACTTCAAGCTCCGCATTGTATTATGCCATGTTGACGTGG	TGCAGAAGAACTTCAAGCTTCGTGTTGTATTGTGCCATGTTGATGTGG	69	1212	NC_026154.1_-_XP_011091480.1 Sesamum indicum cultivar Zhongzhi No. 13 linkage group LG10, S_indicum_v1.0, whole genome shotgun sequence	DNA excision repair protein ERCC-1 isoform X3
	1015	NC_026154.1 - XP_011091481.1	89.583	48	5	0	1	48	518	565	6.86e-11	65.3	NC_026154.1_-_XP_011091481.1	71	43	43	0	89.58	1	1	TGCAGAAGAACTTCAAGCTCCGCATTGTATTATGCCATGTTGACGTGG	TGCAGAAGAACTTCAAGCTTCGTGTTGTATTGTGCCATGTTGATGTGG	69	1200	NC_026154.1_-_XP_011091481.1 Sesamum indicum cultivar Zhongzhi No. 13 linkage group LG10, S_indicum_v1.0, whole genome shotgun sequence	DNA excision repair protein ERCC-1 isoform X3
	1025	NC_026150.1 - XP_011081697.1	89.796	49	5	0	1	49	599	647	1.96e-11	67.1	NC_026150.1_-_XP_011081697.1	73	44	44	0	89.8	1	1	TGCAGAAGAAGATCAACAGGCGTAGGGATTTCTATCATTGGTGGACCAA	TGCAGAAGAAAATCAACAGGCGCAAGGATTTCCTTCATTGGTGGACCAA	69	651	NC_026150.1_-_XP_011081697.1 Sesamum indicum cultivar Zhongzhi No. 13 linkage group LG6, S_indicum_v1.0, whole genome shotgun sequence	NADH dehydrogenase [ubiquinone] iron-sulfur protein 7, mitochondrial-like
	1028	NC_026148.1 - XP_020548799.1	84.058	69	11	0	1	69	1233	1165	3.79e-14	76.1	NC_026148.1_-_XP_020548799.1	83	58	58	0	84.06	1	-1	TGCAGAAGAAGCCAACATTGGCACAGGGGTGGCCATACCGTGGCTTGGCATTTTCCATGTCCAGTTTGA	TGCAGAAGAAGAGAAAAGTGGCACAGGGGCGACGACACCATGGCTTGGCATTTTCCAAGGCCAGTTTGA	69	1338	NC_026148.1_-_XP_020548799.1 Sesamum indicum cultivar Zhongzhi No. 13 linkage group LG4, S_indicum_v1.0, whole genome shotgun sequence	AP2-like ethylene-responsive transcription factor TOE3 isoform X2
	1028	NC_026148.1 - XP_020548798.1	84.058	69	11	0	1	69	1233	1165	3.79e-14	76.1	NC_026148.1_-_XP_020548798.1	83	58	58	0	84.06	1	-1	TGCAGAAGAAGCCAACATTGGCACAGGGGTGGCCATACCGTGGCTTGGCATTTTCCATGTCCAGTTTGA	TGCAGAAGAAGAGAAAAGTGGCACAGGGGCGACGACACCATGGCTTGGCATTTTCCAAGGCCAGTTTGA	69	1338	NC_026148.1_-_XP_020548798.1 Sesamum indicum cultivar Zhongzhi No. 13 linkage group LG4, S_indicum_v1.0, whole genome shotgun sequence	AP2-like ethylene-responsive transcription factor TOE3 isoform X2
	1040	NC_026149.1 - XP_011079308.1	88.406	69	8	0	1	69	908	976	1.72e-18	89.7	NC_026149.1_-_XP_011079308.1	98	61	61	0	88.41	1	1	TGCAGAAGAATCACATGGTGTATGACTACTGCAAGGATCGATGGAGGTTCCCCAAGGGCCCTGCCCGTG	TGCAGAAGAAACACATGGTGTATGATTATTGCAAGGATAAGTGGAGGTTCCCTAAGGGCCCTGGCCGTG	69	993	NC_026149.1_-_XP_011079308.1 Sesamum indicum cultivar Zhongzhi No. 13 linkage group LG5, S_indicum_v1.0, whole genome shotgun sequence	xyloglucan endotransglucosylase/hydrolase protein 22
	1045	NC_026158.1 - XP_011097633.1	89.062	64	7	0	6	69	194	257	7.32e-17	85.1	NC_026158.1_-_XP_011097633.1	93	57	57	0	89.06	1	1	AAGAATGCACCTCAGTGCTGGAACTTGACTACAATCACACCGGAGCACTGATGTTGCGCGCTCA	AAGAGTGCACCTCAGTGCTGGAGCTTGATCACAACCACACTGGAGCACTGATGTTGCGAGCTCA	69	807	NC_026158.1_-_XP_011097633.1 Sesamum indicum cultivar Zhongzhi No. 13 linkage group LG14, S_indicum_v1.0, whole genome shotgun sequence	FK506-binding protein 59-like
	1045	NC_026156.1 - XP_011095703.1	86.765	68	9	0	2	69	169	236	2.56e-16	83.3	NC_026156.1_-_XP_011095703.1	91	59	59	0	86.76	1	1	GCAGAAGAATGCACCTCAGTGCTGGAACTTGACTACAATCACACCGGAGCACTGATGTTGCGCGCTCA	GCAAAAGAATGCACCTCAGTGCTGGAGCTTGATCACCAGCACACTGGAGCACTAATGTTGCGTGCTCA	69	795	NC_026156.1_-_XP_011095703.1 Sesamum indicum cultivar Zhongzhi No. 13 linkage group LG12, S_indicum_v1.0, whole genome shotgun sequence	sperm-associated antigen 1
	1047	NC_026150.1 - XP_011082117.1	88.06	67	8	0	1	67	758	824	2.1e-17	86	NC_026150.1_-_XP_011082117.1	94	59	59	0	88.06	1	1	TGCAGAAGAATGGGTTTGGAAACATGACGATCATCGTTGGAGAGATCGGATGGCCGACCGATGGGGA	TGCAGAAAAATGGATTTGGAAACATGACCATCATCGTTGGAGAAATTGGGTGGCCGACTGATGGAGA	69	1455	NC_026150.1_-_XP_011082117.1 Sesamum indicum cultivar Zhongzhi No. 13 linkage group LG6, S_indicum_v1.0, whole genome shotgun sequence	glucan endo-1,3-beta-glucosidase 5
	1052	NC_026156.1 - XP_011096857.1	82.09	67	12	0	3	69	304	238	5.63e-12	68	NC_026156.1_-_XP_011096857.1	74	55	55	0	82.09	1	-1	CAGAAGAATTTTCTTTTTTCTTCAAAGAATGCCGACTCCACGGACGCGGAATATCAGGATCTCCAAC	CAGAAGAATTCTCCTTTTTCTTCAGTGAGTGCTGACTCCATGGGCGCGGCATGTTGGGATCTCCAAC	69	2550	NC_026156.1_-_XP_011096857.1 Sesamum indicum cultivar Zhongzhi No. 13 linkage group LG12, S_indicum_v1.0, whole genome shotgun sequence	multiple RNA-binding domain-containing protein 1 isoform X2
	1057	NC_026153.1 - XP_011089891.1	84.615	65	10	0	5	69	823	887	1.32e-13	73.4	NC_026153.1_-_XP_011089891.1	80	55	55	0	84.62	1	1	GAAGACACTGCTTTCTCCACAGCTCGTTTCTACCAGCTTGGTGGAACTTTCCTCAATTATTACAT	GAAGACATTGCTTTCTCCACTGCACGCTTTTACCAGCTTGGTGGAATGTTTCTAAACTATTACAT	69	2556	NC_026153.1_-_XP_011089891.1 Sesamum indicum cultivar Zhongzhi No. 13 linkage group LG9, S_indicum_v1.0, whole genome shotgun sequence	beta-galactosidase 8 isoform X2
	1057	NC_026153.1 - XP_011089892.1	84.615	65	10	0	5	69	823	887	1.32e-13	73.4	NC_026153.1_-_XP_011089892.1	80	55	55	0	84.62	1	1	GAAGACACTGCTTTCTCCACAGCTCGTTTCTACCAGCTTGGTGGAACTTTCCTCAATTATTACAT	GAAGACATTGCTTTCTCCACTGCACGCTTTTACCAGCTTGGTGGAATGTTTCTAAACTATTACAT	69	2124	NC_026153.1_-_XP_011089892.1 Sesamum indicum cultivar Zhongzhi No. 13 linkage group LG9, S_indicum_v1.0, whole genome shotgun sequence	beta-galactosidase 8 isoform X2
	1064	NC_026145.1 - XP_011080439.1	91.837	49	4	0	16	64	803	851	4.62e-13	71.6	NC_026145.1_-_XP_011080439.1	78	45	45	0	91.84	1	1	CCAAGGGCCATGGCTCAATCAGTGGATCTCATATGGGTGATAGAAGGAG	CCAAGGGCCATGGGTCCATTAGTGGATCACATATGGGTGATAGAAGGAG	69	2097	NC_026145.1_-_XP_011080439.1 Sesamum indicum cultivar Zhongzhi No. 13 linkage group LG1, S_indicum_v1.0, whole genome shotgun sequence	protein PAF1 homolog
	1074	NC_026148.1 - XP_011076062.1	88.06	67	8	0	1	67	4229	4295	2.1e-17	86	NC_026148.1_-_XP_011076062.1	94	59	59	0	88.06	1	1	TGCAGAAGACTATAAGGACAGAGTTTGCGGATTGCACGGTCATCACCGTGGCACATAGAATACCCAC	TGCAGAAGACAATCAGGACAGAATTTGCGGATTGCACTGTGATCACTGTGGCTCATAGAATACCAAC	69	4446	NC_026148.1_-_XP_011076062.1 Sesamum indicum cultivar Zhongzhi No. 13 linkage group LG4, S_indicum_v1.0, whole genome shotgun sequence	ABC transporter C family member 10
	1074	NC_026148.1 - XP_011076061.1	88.06	67	8	0	1	67	4229	4295	2.1e-17	86	NC_026148.1_-_XP_011076061.1	94	59	59	0	88.06	1	1	TGCAGAAGACTATAAGGACAGAGTTTGCGGATTGCACGGTCATCACCGTGGCACATAGAATACCCAC	TGCAGAAGACAATCAGGACAGAATTTGCGGATTGCACTGTGATCACTGTGGCTCATAGAATACCAAC	69	4446	NC_026148.1_-_XP_011076061.1 Sesamum indicum cultivar Zhongzhi No. 13 linkage group LG4, S_indicum_v1.0, whole genome shotgun sequence	ABC transporter C family member 10
	1092	NC_026145.1 - XP_011089588.1	85.075	67	10	0	3	69	808	874	1.09e-14	77	NC_026145.1_-_XP_011089588.1	84	57	57	0	85.07	1	1	CAGAAGAGACCTTATCGCCCCGGTATAGATAACCTTCTTGTATTGCTCATTGGAGGGATCCCAATTG	CAGGAGAGACCATATCGTCCTGGTATTGATAATCTTCTCGTATTGCTCATTGGTGGGATTCCCATTG	69	2895	NC_026145.1_-_XP_011089588.1 Sesamum indicum cultivar Zhongzhi No. 13 linkage group LG1, S_indicum_v1.0, whole genome shotgun sequence	plasma membrane ATPase 1
	1100	NC_026156.1 - XP_011095398.1	88.06	67	8	0	3	69	1124	1190	2.1e-17	86	NC_026156.1_-_XP_011095398.1	94	59	59	0	88.06	1	1	CAGAAGAGATTCTTGGGCTGAAAGCCATGTTTAGAAATATGGACACCGACAAAAGCGGCACCATCAC	CAGAAGAAATTCAAGGGCTGAAAGCAATGTTTACAAATATGGACACTGACAACAGTGGCACCATCAC	69	1572	NC_026156.1_-_XP_011095398.1 Sesamum indicum cultivar Zhongzhi No. 13 linkage group LG12, S_indicum_v1.0, whole genome shotgun sequence	calcium-dependent protein kinase 33-like
	1101	NC_026156.1 - XP_011095398.1	88.06	67	8	0	3	69	1124	1190	2.1e-17	86	NC_026156.1_-_XP_011095398.1	94	59	59	0	88.06	1	1	CAGAAGAGATTCTTGGGCTGAAAGCCATGTTTAGAAATATGGACACCGACAAAAGCGGCACCATCAC	CAGAAGAAATTCAAGGGCTGAAAGCAATGTTTACAAATATGGACACTGACAACAGTGGCACCATCAC	69	1572	NC_026156.1_-_XP_011095398.1 Sesamum indicum cultivar Zhongzhi No. 13 linkage group LG12, S_indicum_v1.0, whole genome shotgun sequence	calcium-dependent protein kinase 33-like
	1106	NC_026153.1 - XP_011088810.1	83.582	67	11	0	1	67	461	527	4.62e-13	72.5	NC_026153.1_-_XP_011088810.1	79	56	56	0	83.58	1	1	TGCAGAAGAGCCCTCTTTACATCTTTGCAGAGTCTTATGGAGGGAAATTTGCTGCCACTGTTGGGTT	TGCAGAGGAGCCCTCTTTACATAGTGGCAGAGTCTTATGGAGGGAAGTATGCTGTTACACTTGGATT	69	1377	NC_026153.1_-_XP_011088810.1 Sesamum indicum cultivar Zhongzhi No. 13 linkage group LG9, S_indicum_v1.0, whole genome shotgun sequence	serine carboxypeptidase-like 51
	1106	NC_026153.1 - XP_011089976.1	83.077	65	11	0	3	67	481	545	5.63e-12	68.9	NC_026153.1_-_XP_011089976.1	75	54	54	0	83.08	1	1	CAGAAGAGCCCTCTTTACATCTTTGCAGAGTCTTATGGAGGGAAATTTGCTGCCACTGTTGGGTT	CAGAAAAGCCCTCTCTATATAGTAGCAGAGTCTTATGGAGGGAAATATGCTGTTACTCTTGGATT	69	1410	NC_026153.1_-_XP_011089976.1 Sesamum indicum cultivar Zhongzhi No. 13 linkage group LG9, S_indicum_v1.0, whole genome shotgun sequence	serine carboxypeptidase-like 51
	1114	NC_026149.1 - XP_011077561.1	82.812	64	11	0	5	68	61	124	1.96e-11	67.1	NC_026149.1_-_XP_011077561.1	73	53	53	0	82.81	1	1	GAAGAGGAAAGGAGCGAAACCCATGAGAGTTTTGTGGAGCGGAAACACCAATTTCCCGAGATGG	GAAGAAGAAAGGACTGAATCCCATGAGAGCTTCGTGGAGAGAAAGCACCAATTTCCTGGGATGG	69	756	NC_026149.1_-_XP_011077561.1 Sesamum indicum cultivar Zhongzhi No. 13 linkage group LG5, S_indicum_v1.0, whole genome shotgun sequence	protein N-methyltransferase NNT1
	1117	NC_026147.1 - XP_011073680.1	90.625	64	6	0	1	64	686	749	1.72e-18	89.7	NC_026147.1_-_XP_011073680.1	98	58	58	0	90.62	1	1	TGCAGAAGAGGAAGGAGGTTGTGCATTGCGTTACGCTTCATGAGATTGACGTTATCAACAGCAG	TGCAGAAGAGGAAGGAAGTTGTGCATTGTGTTACGCTTCACGAGATAGATGTCATCAACAGCAG	69	1404	NC_026147.1_-_XP_011073680.1 Sesamum indicum cultivar Zhongzhi No. 13 linkage group LG3, S_indicum_v1.0, whole genome shotgun sequence	ruvB-like 2
	1127	NC_026150.1 - XP_020549895.1	87.692	65	8	0	3	67	1063	1127	2.56e-16	82.4	NC_026150.1_-_XP_020549895.1	90	57	57	0	87.69	1	1	CAGAAGAGGTATAAAGAGGCTGCCCCTGCCACATTGGCCTTACTAGAACAATGCTGTAGTGAAGT	CAGAAGAGGTACAAAGAAGCTGCCCCTGCCACGTTGGCTATACTAGAACAGCGCTGCAGTGAAGT	69	2481	NC_026150.1_-_XP_020549895.1 Sesamum indicum cultivar Zhongzhi No. 13 linkage group LG6, S_indicum_v1.0, whole genome shotgun sequence	dynamin-related protein 5A-like
	1127	NC_026158.1 - XP_011098296.1	88	50	6	0	3	52	1039	1088	6.86e-11	64.4	NC_026158.1_-_XP_011098296.1	70	44	44	0	88	1	1	CAGAAGAGGTATAAAGAGGCTGCCCCTGCCACATTGGCCTTACTAGAACA	CAGAAGAAATACAAAGAAGCTGCCCCTGCCACATTGGCGTTACTGGAACA	69	2514	NC_026158.1_-_XP_011098296.1 Sesamum indicum cultivar Zhongzhi No. 13 linkage group LG14, S_indicum_v1.0, whole genome shotgun sequence	dynamin-related protein 5A
	1135	NC_026152.1 - XP_011087419.1	87.692	65	8	0	5	69	631	695	2.56e-16	82.4	NC_026152.1_-_XP_011087419.1	90	57	57	0	87.69	1	1	GAAGAGTTTGTGCAGTATACTCATACCCGCGATGCTGTAGATGTAACATTTGGAGTGAAGGAGCT	GAAGAGTTTGTGCAATATACTCACACTGGTAATCCTGTAGATGTAACATTTGGGGTGAAGGAGCT	69	1314	NC_026152.1_-_XP_011087419.1 Sesamum indicum cultivar Zhongzhi No. 13 linkage group LG8, S_indicum_v1.0, whole genome shotgun sequence	uncharacterized protein LOC105168915 isoform X4
	1135	NC_026152.1 - XP_011087418.1	87.692	65	8	0	5	69	631	695	2.56e-16	82.4	NC_026152.1_-_XP_011087418.1	90	57	57	0	87.69	1	1	GAAGAGTTTGTGCAGTATACTCATACCCGCGATGCTGTAGATGTAACATTTGGAGTGAAGGAGCT	GAAGAGTTTGTGCAATATACTCACACTGGTAATCCTGTAGATGTAACATTTGGGGTGAAGGAGCT	69	1314	NC_026152.1_-_XP_011087418.1 Sesamum indicum cultivar Zhongzhi No. 13 linkage group LG8, S_indicum_v1.0, whole genome shotgun sequence	uncharacterized protein LOC105168915 isoform X4
	1136	NC_026153.1 - XP_011089912.1	85.075	67	10	0	1	67	1643	1577	1.09e-14	77	NC_026153.1_-_XP_011089912.1	84	57	57	0	85.07	1	-1	TGCAGAAGATAAACGTCCCTAGACGAAAAAGCATCCTCGTGAATAAGCGAGTGTCCTTCCAGACGAA	TGTAGAAGATGAATGTCCCTGGATCCAAAAGCATCCTCATGACTAAGCGAGTGTCCTTCCAAACGAA	69	2520	NC_026153.1_-_XP_011089912.1 Sesamum indicum cultivar Zhongzhi No. 13 linkage group LG9, S_indicum_v1.0, whole genome shotgun sequence	homeobox-leucine zipper protein REVOLUTA
	1144	NC_026154.1 - XP_011090776.1	86.154	65	9	0	2	66	557	493	1.09e-14	77.9	NC_026154.1_-_XP_011090776.1	85	56	56	0	86.15	1	-1	GCAGAAGATAGCATACATAGAAGAGACTCCCATTGGTTTCTCCCGATAGAGTCGCCTGCAAATAC	GCAGAAGACAGCATGCAGAGCAGAGACTCCCACTGGTTTCTCCCGATTGAGTCCCCCGCAAACAC	69	1371	NC_026154.1_-_XP_011090776.1 Sesamum indicum cultivar Zhongzhi No. 13 linkage group LG10, S_indicum_v1.0, whole genome shotgun sequence	protein trichome birefringence-like 10
	1144	NC_026150.1 - XP_011079836.1	83.333	66	11	0	4	69	651	586	1.61e-12	70.7	NC_026150.1_-_XP_011079836.1	77	55	55	0	83.33	1	-1	AGAAGATAGCATACATAGAAGAGACTCCCATTGGTTTCTCCCGATAGAGTCGCCTGCAAATACTAG	AGAAGATAGCATGCAAAGAAGCGACTCCCATTGGTTTCTTCCTACAGAATCTCCTACAAACACCAG	69	1428	NC_026150.1_-_XP_011079836.1 Sesamum indicum cultivar Zhongzhi No. 13 linkage group LG6, S_indicum_v1.0, whole genome shotgun sequence	protein trichome birefringence-like 11
	1158	NC_026153.1 - XP_011088863.1	88.406	69	8	0	1	69	318	386	1.72e-18	89.7	NC_026153.1_-_XP_011088863.1	98	61	61	0	88.41	1	1	TGCAGAAGATCTCTATGGTATTTTTATAAATAGAGTACGTAGAGAGCGCCCGCCGGAGTACCTAGAAAA	TGCTGAAGATCTTTATGGTATTTTCATTAACAGAGTACGTAGAGAGCGCCCACCGGAGTATCTGGAAAA	69	1164	NC_026153.1_-_XP_011088863.1 Sesamum indicum cultivar Zhongzhi No. 13 linkage group LG9, S_indicum_v1.0, whole genome shotgun sequence	flagellar radial spoke protein 5 isoform X2
	1158	NC_026153.1 - XP_020552233.1	88.406	69	8	0	1	69	117	185	1.72e-18	89.7	NC_026153.1_-_XP_020552233.1	98	61	61	0	88.41	1	1	TGCAGAAGATCTCTATGGTATTTTTATAAATAGAGTACGTAGAGAGCGCCCGCCGGAGTACCTAGAAAA	TGCTGAAGATCTTTATGGTATTTTCATTAACAGAGTACGTAGAGAGCGCCCACCGGAGTATCTGGAAAA	69	963	NC_026153.1_-_XP_020552233.1 Sesamum indicum cultivar Zhongzhi No. 13 linkage group LG9, S_indicum_v1.0, whole genome shotgun sequence	flagellar radial spoke protein 5 isoform X2
	1159	NC_026146.1 - XP_020554996.1	91.176	68	6	0	2	69	73	140	1.16e-20	96.9	NC_026146.1_-_XP_020554996.1	106	62	62	0	91.18	1	1	GCAGAAGATGAAAAACTTCGGCAGCTCGTCCAGAAATATGGCCCTCAAAACTGGAATTCGATTGCTGA	GCTGAAGATGAAAAGCTCCGGCAGCTCGTCCAGCAATATGGCCCTCAGAACTGGAATTCTATTGCTGA	69	930	NC_026146.1_-_XP_020554996.1 Sesamum indicum cultivar Zhongzhi No. 13 linkage group LG2, S_indicum_v1.0, whole genome shotgun sequence	transcription factor MYB27
	1159	NC_026146.1 - XP_011101908.1	91.176	68	6	0	2	69	73	140	1.16e-20	96.9	NC_026146.1_-_XP_011101908.1	106	62	62	0	91.18	1	1	GCAGAAGATGAAAAACTTCGGCAGCTCGTCCAGAAATATGGCCCTCAAAACTGGAATTCGATTGCTGA	GCTGAAGATGAAAAGCTCCGGCAGCTCGTCCAGCAATATGGCCCTCAGAACTGGAATTCTATTGCTGA	69	930	NC_026146.1_-_XP_011101908.1 Sesamum indicum cultivar Zhongzhi No. 13 linkage group LG2, S_indicum_v1.0, whole genome shotgun sequence	transcription factor MYB27
	1161	NC_026145.1 - XP_020549109.1	88.525	61	7	0	2	62	454	514	3.11e-15	79.7	NC_026145.1_-_XP_020549109.1	87	54	54	0	88.52	1	1	GCAGAAGATGAAGATGATTCTCATCGAAGTTTGCTTCGTAGAACGACGATAGGAAATGGTC	GCAGAAGATGAAGGCAATTCTCATCGAAGTTTGGTGCGCAGAACGACGATAGGAAACGGTC	69	1749	NC_026145.1_-_XP_020549109.1 Sesamum indicum cultivar Zhongzhi No. 13 linkage group LG1, S_indicum_v1.0, whole genome shotgun sequence	protein ENHANCED DISEASE RESISTANCE 2 isoform X2
	1161	NC_026145.1 - XP_020549111.1	88.525	61	7	0	2	62	454	514	3.11e-15	79.7	NC_026145.1_-_XP_020549111.1	87	54	54	0	88.52	1	1	GCAGAAGATGAAGATGATTCTCATCGAAGTTTGCTTCGTAGAACGACGATAGGAAATGGTC	GCAGAAGATGAAGGCAATTCTCATCGAAGTTTGGTGCGCAGAACGACGATAGGAAACGGTC	69	1749	NC_026145.1_-_XP_020549111.1 Sesamum indicum cultivar Zhongzhi No. 13 linkage group LG1, S_indicum_v1.0, whole genome shotgun sequence	protein ENHANCED DISEASE RESISTANCE 2 isoform X2
	1166	NC_026145.1 - XP_011087376.1	84.058	69	11	0	1	69	207	275	3.79e-14	76.1	NC_026145.1_-_XP_011087376.1	83	58	58	0	84.06	1	1	TGCAGAAGATGCAGATAAAGAAAAGGAAAAAGACCTGTTAGCCCAGATTGAGAAGCTTCAGTGTCAAAA	TGCAGAAGATGCATATAAAGAAAAGGAAAAGGACCTGCAACTCCAGATTAAGAGGCTTCAAGGTGAAAA	69	2217	NC_026145.1_-_XP_011087376.1 Sesamum indicum cultivar Zhongzhi No. 13 linkage group LG1, S_indicum_v1.0, whole genome shotgun sequence	protein gamma response 1 isoform X2
	1166	NC_026145.1 - XP_011087385.1	84.058	69	11	0	1	69	207	275	3.79e-14	76.1	NC_026145.1_-_XP_011087385.1	83	58	58	0	84.06	1	1	TGCAGAAGATGCAGATAAAGAAAAGGAAAAAGACCTGTTAGCCCAGATTGAGAAGCTTCAGTGTCAAAA	TGCAGAAGATGCATATAAAGAAAAGGAAAAGGACCTGCAACTCCAGATTAAGAGGCTTCAAGGTGAAAA	69	2088	NC_026145.1_-_XP_011087385.1 Sesamum indicum cultivar Zhongzhi No. 13 linkage group LG1, S_indicum_v1.0, whole genome shotgun sequence	protein gamma response 1 isoform X2
	1173	NC_026153.1 - XP_020552288.1	90.909	55	5	0	1	55	332	386	1.09e-14	77.9	NC_026153.1_-_XP_020552288.1	85	50	50	0	90.91	1	1	TGCAGAAGATGCCTATTATTGGTTGGTTATTCCAGCAACCTTTTGTGAGATCGGT	TGCAGAAGATTCCTATTCTTGGTTGGCTTTTACAGCAACCTTTTGTGAGATCGGT	69	423	NC_026153.1_-_XP_020552288.1 Sesamum indicum cultivar Zhongzhi No. 13 linkage group LG9, S_indicum_v1.0, whole genome shotgun sequence	vesicle transport protein GOT1-like
	1173	NC_026153.1 - XP_011089130.1	90.909	55	5	0	1	55	332	386	1.09e-14	77.9	NC_026153.1_-_XP_011089130.1	85	50	50	0	90.91	1	1	TGCAGAAGATGCCTATTATTGGTTGGTTATTCCAGCAACCTTTTGTGAGATCGGT	TGCAGAAGATTCCTATTCTTGGTTGGCTTTTACAGCAACCTTTTGTGAGATCGGT	69	423	NC_026153.1_-_XP_011089130.1 Sesamum indicum cultivar Zhongzhi No. 13 linkage group LG9, S_indicum_v1.0, whole genome shotgun sequence	vesicle transport protein GOT1-like
	1184	NC_026150.1 - XP_011080287.1	88.525	61	7	0	9	69	1234	1294	3.11e-15	79.7	NC_026150.1_-_XP_011080287.1	87	54	54	0	88.52	1	1	ATTGGGGCAAAGAAAATACCAGAACACATTAGATGTCACAAGCAGACTGATTTGGAAAAGG	ATTGGGGCAAGGAAAATACCAGAACATGTTCGATGTCACAAGCAGACTGACCTGGAAAGGG	69	2469	NC_026150.1_-_XP_011080287.1 Sesamum indicum cultivar Zhongzhi No. 13 linkage group LG6, S_indicum_v1.0, whole genome shotgun sequence	origin of replication complex subunit 1A
	1195	NC_026150.1 - XP_011080994.1	88.406	69	8	0	1	69	1380	1448	1.72e-18	89.7	NC_026150.1_-_XP_011080994.1	98	61	61	0	88.41	1	1	TGCAGAAGCAAATGTACTCCTAAAGCACCATGATGGCATAGGTGCACTAACTTTAGTTGGAGGGACACG	TGCAGAAGCGAATGTGCTCCTAAAGCACCATGATAGCATAGGCGTGCAAACATTAGTTGGAGGGACACG	69	2514	NC_026150.1_-_XP_011080994.1 Sesamum indicum cultivar Zhongzhi No. 13 linkage group LG6, S_indicum_v1.0, whole genome shotgun sequence	probable DEAD-box ATP-dependent RNA helicase 48 isoform X2
	1195	NC_026150.1 - XP_011080995.1	88.406	69	8	0	1	69	1380	1448	1.72e-18	89.7	NC_026150.1_-_XP_011080995.1	98	61	61	0	88.41	1	1	TGCAGAAGCAAATGTACTCCTAAAGCACCATGATGGCATAGGTGCACTAACTTTAGTTGGAGGGACACG	TGCAGAAGCGAATGTGCTCCTAAAGCACCATGATAGCATAGGCGTGCAAACATTAGTTGGAGGGACACG	69	2511	NC_026150.1_-_XP_011080995.1 Sesamum indicum cultivar Zhongzhi No. 13 linkage group LG6, S_indicum_v1.0, whole genome shotgun sequence	probable DEAD-box ATP-dependent RNA helicase 48 isoform X2
	1197	NC_026151.1 - XP_011083725.1	84.058	69	11	0	1	69	674	606	3.79e-14	76.1	NC_026151.1_-_XP_011083725.1	83	58	58	0	84.06	1	-1	TGCAGAAGCAACGACGAAGTAGACAACTGCTTCTGCCTCGAGGAAATTGAGGACAGACAGCTGAAACTA	TGTAGCAACATCGAAGAAGTTGATAGCTGCTTCTGCCTCGATGAGATTGAGGACAGACAACTGAAACTA	69	744	NC_026151.1_-_XP_011083725.1 Sesamum indicum cultivar Zhongzhi No. 13 linkage group LG7, S_indicum_v1.0, whole genome shotgun sequence	deSI-like protein At4g17486
	1197	NC_026151.1 - XP_011083723.1	84.058	69	11	0	1	69	674	606	3.79e-14	76.1	NC_026151.1_-_XP_011083723.1	83	58	58	0	84.06	1	-1	TGCAGAAGCAACGACGAAGTAGACAACTGCTTCTGCCTCGAGGAAATTGAGGACAGACAGCTGAAACTA	TGTAGCAACATCGAAGAAGTTGATAGCTGCTTCTGCCTCGATGAGATTGAGGACAGACAACTGAAACTA	69	744	NC_026151.1_-_XP_011083723.1 Sesamum indicum cultivar Zhongzhi No. 13 linkage group LG7, S_indicum_v1.0, whole genome shotgun sequence	deSI-like protein At4g17486
	1198	NC_026145.1 - XP_020550687.1	89.855	69	7	0	1	69	677	609	1.41e-19	94.2	NC_026145.1_-_XP_020550687.1	103	62	62	0	89.86	1	-1	TGCAGAAGCAACTCGATACAACCCTTTGGGGTACAAGGAATAAATAGTGGCTCCATTCCTTGCATGGCC	TGCAGAAGCAACTCGATGCATCCTTTTGGGGTACAAGGAACGAATAATGGCTCCATGCCTTGCATGGCC	69	1101	NC_026145.1_-_XP_020550687.1 Sesamum indicum cultivar Zhongzhi No. 13 linkage group LG1, S_indicum_v1.0, whole genome shotgun sequence	bifunctional protein FolD 4, chloroplastic
	1203	NC_026145.1 - XP_020551475.1	85.507	69	10	0	1	69	131	63	8.92e-16	80.6	NC_026145.1_-_XP_020551475.1	88	59	59	0	85.51	1	-1	TGCAGAAGCAAGTCCTCAGCTTGAGAGGGAGACGTCGAGCACAAATGAAGCCGTAGCTGCATGGCTTTC	TGCAGAAGCAAGTCCTGTGCTTCAGAGGGGGACGTCGAGAACAAATGGAACCGGAGCTGCTTAGCTTTC	69	1047	NC_026145.1_-_XP_020551475.1 Sesamum indicum cultivar Zhongzhi No. 13 linkage group LG1, S_indicum_v1.0, whole genome shotgun sequence	probable WRKY transcription factor 53
	1211	NC_026149.1 - XP_011078850.1	82.353	68	12	0	1	68	572	639	1.61e-12	69.8	NC_026149.1_-_XP_011078850.1	76	56	56	0	82.35	1	1	TGCAGAAGCACATTGGCAATATTCTCTCTCTCTTGGCAGATCCCACAGAAGGGGAAGATGACGAATCT	TGCAGAGACACATCGGGAATATTCTTTCGCTCTTGGCAGACTCCACGGAAGGGGAAGTTGATGACTCT	69	1722	NC_026149.1_-_XP_011078850.1 Sesamum indicum cultivar Zhongzhi No. 13 linkage group LG5, S_indicum_v1.0, whole genome shotgun sequence	TBCC domain-containing protein 1
	1217	NC_026159.1 - XP_011099818.1	85.075	67	10	0	1	67	665	731	1.09e-14	77	NC_026159.1_-_XP_011099818.1	84	57	57	0	85.07	1	1	TGCAGAAGCAGATAGATGCCAAGATCAATGACATCGTAGTAAAAGGCTGGCCAATCCTAAGGGAGAT	TGCAGAGGCAGATTGATGCTAAGATCGATGACATTATAAGAAAAGGTTGGCCGATCCTAAGGGAGAT	69	735	NC_026159.1_-_XP_011099818.1 Sesamum indicum cultivar Zhongzhi No. 13 linkage group LG15, S_indicum_v1.0, whole genome shotgun sequence	peptide methionine sulfoxide reductase A5 isoform X2
	1218	NC_026157.1 - XP_011097324.1	88.406	69	8	0	1	69	1467	1535	1.72e-18	89.7	NC_026157.1_-_XP_011097324.1	98	61	61	0	88.41	1	1	TGCAGAAGCAGATCAGCTGTTGGAGAAGGTTGGCTATGTGCAAACACACGGCTACATATGGATCCCTCC	TGCAGAAGCAGATCAACTCTTGGAGAGGGCAGGCTATGTGCAAACACATGGCTATATATGGATCCCCCC	69	1548	NC_026157.1_-_XP_011097324.1 Sesamum indicum cultivar Zhongzhi No. 13 linkage group LG13, S_indicum_v1.0, whole genome shotgun sequence	glucose-6-phosphate 1-dehydrogenase, cytoplasmic isoform
	1218	NC_026157.1 - XP_011097325.1	88.406	69	8	0	1	69	1467	1535	1.72e-18	89.7	NC_026157.1_-_XP_011097325.1	98	61	61	0	88.41	1	1	TGCAGAAGCAGATCAGCTGTTGGAGAAGGTTGGCTATGTGCAAACACACGGCTACATATGGATCCCTCC	TGCAGAAGCAGATCAACTCTTGGAGAGGGCAGGCTATGTGCAAACACATGGCTATATATGGATCCCCCC	69	1548	NC_026157.1_-_XP_011097325.1 Sesamum indicum cultivar Zhongzhi No. 13 linkage group LG13, S_indicum_v1.0, whole genome shotgun sequence	glucose-6-phosphate 1-dehydrogenase, cytoplasmic isoform
	1221	NC_026159.1 - XP_011099562.1	86.957	69	9	0	1	69	555	487	7.32e-17	85.1	NC_026159.1_-_XP_011099562.1	93	60	60	0	86.96	1	-1	TGCAGAAGCAGCACTACCATCAGAACCTTCCAAAGCATTGTGAAGCATGCGAAGAGCCTCTTGTCTCAC	TGCAGATGAAGCACTCCCTTCAGAACCCTCCAAAGCATTGCGAAGCATGTGCAAAGCCTCTTGTCTCAC	69	6735	NC_026159.1_-_XP_011099562.1 Sesamum indicum cultivar Zhongzhi No. 13 linkage group LG15, S_indicum_v1.0, whole genome shotgun sequence	HEAT repeat-containing protein 5B
	1225	NC_026149.1 - XP_011077777.1	80.882	68	13	0	1	68	209	142	6.86e-11	65.3	NC_026149.1_-_XP_011077777.1	71	55	55	0	80.88	1	-1	TGCAGAAGCAGCGCCTTCTCCACCAGCTCCGACAGCTCGGTGTAGTGTGAATCGAGGAGAGCGACGAG	TGCAGCAAGAGGGCTTTCTCCACCAGCTCCGAGAGCTCAGTGTAGTGAGAATCCAAGAGCGCCACTAG	69	1392	NC_026149.1_-_XP_011077777.1 Sesamum indicum cultivar Zhongzhi No. 13 linkage group LG5, S_indicum_v1.0, whole genome shotgun sequence	fasciclin-like arabinogalactan protein 17
	1226	NC_026155.1 - XP_011095150.1	82.857	70	9	1	2	68	363	432	4.62e-13	71.6	NC_026155.1_-_XP_011095150.1	78	58	58	3	82.86	1	1	GCAGAAGCAGCTCGAAGTCGAAGTCGACCGCTTGTACCGTCTCAAGGAGATCAAGTTAGCT---TGCATG	GCAGAAGCAGCTGGAGATCGAGGTTGATCGGTTGTATCGACTCAAGGAGATCAAGTTAGCTGCCTGCATG	69	504	NC_026155.1_-_XP_011095150.1 Sesamum indicum cultivar Zhongzhi No. 13 linkage group LG11, S_indicum_v1.0, whole genome shotgun sequence	high mobility group B protein 6
	1230	NC_026147.1 - XP_011072422.1	88.71	62	7	0	1	62	311	372	8.92e-16	81.5	NC_026147.1_-_XP_011072422.1	89	55	55	0	88.71	1	1	TGCAGAAGCAGGTCTCTCAATTAGTGTATGAAAACAGCTACTTTCGCCAGCATACACCAAAT	TGCAGAAACAGGTCTCACAATTGGTGTATGAGAACAGTTACTTTCGCCAGCATACTCCGAAT	69	2523	NC_026147.1_-_XP_011072422.1 Sesamum indicum cultivar Zhongzhi No. 13 linkage group LG3, S_indicum_v1.0, whole genome shotgun sequence	LOW QUALITY PROTEIN: homeobox-leucine zipper protein ATHB-15
	1230	NC_026145.1 - XP_011080516.1	83.333	60	10	0	1	60	332	391	6.86e-11	64.4	NC_026145.1_-_XP_011080516.1	70	50	50	0	83.33	1	1	TGCAGAAGCAGGTCTCTCAATTAGTGTATGAAAACAGCTACTTTCGCCAGCATACACCAA	TGCAGAAACAGGTGTCACAGTTGGTTTACGAAAACGGCTACTTTCGCCAGCATGCTCCAA	69	2538	NC_026145.1_-_XP_011080516.1 Sesamum indicum cultivar Zhongzhi No. 13 linkage group LG1, S_indicum_v1.0, whole genome shotgun sequence	homeobox-leucine zipper protein ATHB-15
	1232	NC_026151.1 - XP_011084661.1	86.792	53	7	0	1	53	601	549	6.86e-11	65.3	NC_026151.1_-_XP_011084661.1	71	46	46	0	86.79	1	-1	TGCAGAAGCAGTCGATATTCGCGTGCATTCTCAACTCCCGGTCCATAACCTTA	TGCAGAAGCAATCGATATTGGCATACATTCTCAACTCTCTGTCCATCACCTTA	69	1458	NC_026151.1_-_XP_011084661.1 Sesamum indicum cultivar Zhongzhi No. 13 linkage group LG7, S_indicum_v1.0, whole genome shotgun sequence	probable protein phosphatase 2C 33
	1240	NC_026152.1 - XP_020551879.1	88.06	67	8	0	1	67	774	840	2.1e-17	86	NC_026152.1_-_XP_020551879.1	94	59	59	0	88.06	1	1	TGCAGAAGCATCTGGCTTGACCGGCGACGTCTCTCAGGTAGAGCAGTTTATCAGAGAACATGTAGAG	TGCAGAAGCATCTGGCTTGACAAGTGATATCGCTCAGTTAGAGCAGTTTATCAGAGAACATGTAAAG	69	846	NC_026152.1_-_XP_020551879.1 Sesamum indicum cultivar Zhongzhi No. 13 linkage group LG8, S_indicum_v1.0, whole genome shotgun sequence	signal recognition particle receptor subunit beta-like isoform X2
	1240	NC_026152.1 - XP_011086594.1	88.06	67	8	0	1	67	714	780	2.1e-17	86	NC_026152.1_-_XP_011086594.1	94	59	59	0	88.06	1	1	TGCAGAAGCATCTGGCTTGACCGGCGACGTCTCTCAGGTAGAGCAGTTTATCAGAGAACATGTAGAG	TGCAGAAGCATCTGGCTTGACAAGTGATATCGCTCAGTTAGAGCAGTTTATCAGAGAACATGTAAAG	69	786	NC_026152.1_-_XP_011086594.1 Sesamum indicum cultivar Zhongzhi No. 13 linkage group LG8, S_indicum_v1.0, whole genome shotgun sequence	signal recognition particle receptor subunit beta-like isoform X2
	1242	NC_026160.1 - XP_011100467.1	88.406	69	8	0	1	69	1244	1176	1.72e-18	89.7	NC_026160.1_-_XP_011100467.1	98	61	61	0	88.41	1	-1	TGCAGAAGCATGTTTCTGGCCCTAGCCAAAATTTGAACTTTCTTTCTTGATGCAAAGTGCACTTCCACA	TGTAGAAGCATATTTCTGGCCTTAGCTAAAATCTGAACTTTCTTTCTTGCTGCAAAGTGCACCTCAACA	69	2355	NC_026160.1_-_XP_011100467.1 Sesamum indicum cultivar Zhongzhi No. 13 linkage group LG16, S_indicum_v1.0, whole genome shotgun sequence	centromere/kinetochore protein zw10 homolog isoform X2
	1242	NC_026160.1 - XP_011100469.1	88.406	69	8	0	1	69	1244	1176	1.72e-18	89.7	NC_026160.1_-_XP_011100469.1	98	61	61	0	88.41	1	-1	TGCAGAAGCATGTTTCTGGCCCTAGCCAAAATTTGAACTTTCTTTCTTGATGCAAAGTGCACTTCCACA	TGTAGAAGCATATTTCTGGCCTTAGCTAAAATCTGAACTTTCTTTCTTGCTGCAAAGTGCACCTCAACA	69	2283	NC_026160.1_-_XP_011100469.1 Sesamum indicum cultivar Zhongzhi No. 13 linkage group LG16, S_indicum_v1.0, whole genome shotgun sequence	centromere/kinetochore protein zw10 homolog isoform X2
	1270	NC_026150.1 - XP_011079942.1	88.235	68	8	0	2	69	229	296	6.01e-18	87.8	NC_026150.1_-_XP_011079942.1	96	60	60	0	88.24	1	1	GCAGAAGCGCTAAAGGTCCTCGACTCATGCGGCTCAGACATTATCGAACTGGGGGTGCCTTATTCCGA	GCAGAAGCGCTGAAAGTCCTTGACTCATGCGGCTCAGACATTATTGAATTAGGAGTGCCTTATTCAGA	69	927	NC_026150.1_-_XP_011079942.1 Sesamum indicum cultivar Zhongzhi No. 13 linkage group LG6, S_indicum_v1.0, whole genome shotgun sequence	tryptophan synthase alpha chain
	1270	NC_026150.1 - XP_011082598.1	83.824	68	11	0	2	69	238	305	1.32e-13	74.3	NC_026150.1_-_XP_011082598.1	81	57	57	0	83.82	1	1	GCAGAAGCGCTAAAGGTCCTCGACTCATGCGGCTCAGACATTATCGAACTGGGGGTGCCTTATTCCGA	GCTGAAGCGCTGAAAATTCTCGACTCATGTGGCTCAGACATTATAGAATTAGGGGTGCCTTACTCAGA	69	936	NC_026150.1_-_XP_011082598.1 Sesamum indicum cultivar Zhongzhi No. 13 linkage group LG6, S_indicum_v1.0, whole genome shotgun sequence	tryptophan synthase alpha chain
	1271	NC_026150.1 - XP_011079942.1	88.235	68	8	0	2	69	229	296	6.01e-18	87.8	NC_026150.1_-_XP_011079942.1	96	60	60	0	88.24	1	1	GCAGAAGCGCTAAAGGTCCTCGACTCATGCGGCTCAGACATTATCGAACTGGGGGTGCCTTATTCCGA	GCAGAAGCGCTGAAAGTCCTTGACTCATGCGGCTCAGACATTATTGAATTAGGAGTGCCTTATTCAGA	69	927	NC_026150.1_-_XP_011079942.1 Sesamum indicum cultivar Zhongzhi No. 13 linkage group LG6, S_indicum_v1.0, whole genome shotgun sequence	tryptophan synthase alpha chain
	1271	NC_026150.1 - XP_011082598.1	83.824	68	11	0	2	69	238	305	1.32e-13	74.3	NC_026150.1_-_XP_011082598.1	81	57	57	0	83.82	1	1	GCAGAAGCGCTAAAGGTCCTCGACTCATGCGGCTCAGACATTATCGAACTGGGGGTGCCTTATTCCGA	GCTGAAGCGCTGAAAATTCTCGACTCATGTGGCTCAGACATTATAGAATTAGGGGTGCCTTACTCAGA	69	936	NC_026150.1_-_XP_011082598.1 Sesamum indicum cultivar Zhongzhi No. 13 linkage group LG6, S_indicum_v1.0, whole genome shotgun sequence	tryptophan synthase alpha chain
	1282	NC_026150.1 - XP_020550018.1	86.667	60	8	0	10	69	7442	7383	1.32e-13	73.4	NC_026150.1_-_XP_020550018.1	80	52	52	0	86.67	1	-1	TAGTCGGGTTTCGTATACTCGAGCAGCATATGAGGCGACCGGTAGATCTTCACGAGCGTC	TAGTCGGGGTTGGTATACTCGAGCAACATATGTGGTGACCGGTAAATCTTCACCAGTGTC	69	7443	NC_026150.1_-_XP_020550018.1 Sesamum indicum cultivar Zhongzhi No. 13 linkage group LG6, S_indicum_v1.0, whole genome shotgun sequence	piezo-type mechanosensitive ion channel homolog isoform X2
	1282	NC_026150.1 - XP_020550019.1	86.667	60	8	0	10	69	5963	5904	1.32e-13	73.4	NC_026150.1_-_XP_020550019.1	80	52	52	0	86.67	1	-1	TAGTCGGGTTTCGTATACTCGAGCAGCATATGAGGCGACCGGTAGATCTTCACGAGCGTC	TAGTCGGGGTTGGTATACTCGAGCAACATATGTGGTGACCGGTAAATCTTCACCAGTGTC	69	5964	NC_026150.1_-_XP_020550019.1 Sesamum indicum cultivar Zhongzhi No. 13 linkage group LG6, S_indicum_v1.0, whole genome shotgun sequence	piezo-type mechanosensitive ion channel homolog isoform X2
	1284	NC_026147.1 - XP_011074103.1	80.882	68	13	0	2	69	1315	1382	6.86e-11	65.3	NC_026147.1_-_XP_011074103.1	71	55	55	0	80.88	1	1	GCAGAAGCTATTCTAGAAGCTTCTGCACAAGGGATCGCGTCTATGCTTTGCGAACACGGGCTTGAGGT	GCAGAAGCCACAGTAGAGGCTACTGCACAAGGGATCGCATCAATGCTTTGTGCACATGGCCCTGAGGT	69	3510	NC_026147.1_-_XP_011074103.1 Sesamum indicum cultivar Zhongzhi No. 13 linkage group LG3, S_indicum_v1.0, whole genome shotgun sequence	protein GIGANTEA-like
	1284	NC_026146.1 - XP_011100590.1	80.882	68	13	0	2	69	1306	1373	6.86e-11	65.3	NC_026146.1_-_XP_011100590.1	71	55	55	0	80.88	1	1	GCAGAAGCTATTCTAGAAGCTTCTGCACAAGGGATCGCGTCTATGCTTTGCGAACACGGGCTTGAGGT	GCAGAAGCTACTGTCGAAGCTACTGCTCAAGGGATTGCATCTATGCTTTGTGCACATGGCCCAGAGGT	69	3501	NC_026146.1_-_XP_011100590.1 Sesamum indicum cultivar Zhongzhi No. 13 linkage group LG2, S_indicum_v1.0, whole genome shotgun sequence	protein GIGANTEA-like
	1290	NC_026151.1 - XP_011084675.1	90.625	64	6	0	6	69	1016	953	1.72e-18	89.7	NC_026151.1_-_XP_011084675.1	98	58	58	0	90.62	1	-1	AAGCTGATATCCAAGTCTTCTTCGGGTATTTCTACATCCAACGAGTCCTCGGGAAGAAGAGGCA	AAGCTGATCTCCAAGTCTTCTTCTGGTATTTCTACATCCATTGATTCATCGGGAAGAAGAGGCA	69	1422	NC_026151.1_-_XP_011084675.1 Sesamum indicum cultivar Zhongzhi No. 13 linkage group LG7, S_indicum_v1.0, whole genome shotgun sequence	peptide chain release factor PrfB1, chloroplastic
	1292	NC_026155.1 - XP_011094902.1	82.609	69	12	0	1	69	193	125	4.62e-13	71.6	NC_026155.1_-_XP_011094902.1	78	57	57	0	82.61	1	-1	TGCAGAAGCTGCAAGAATAAGATCGAGGCGGCCAAACACACCCTCCGAGAGCCCCCGCCGCATCTTCTG	TGCAAAAGCTGCAAGAATAAGATCTGGGAGGCCAAACGCAGCCTCCAAGTGTTCCAGCTGCATCTTCTG	69	927	NC_026155.1_-_XP_011094902.1 Sesamum indicum cultivar Zhongzhi No. 13 linkage group LG11, S_indicum_v1.0, whole genome shotgun sequence	zinc finger protein 10
	1307	NC_026145.1 - XP_011087223.1	91.304	69	6	0	1	69	1085	1153	3.32e-21	98.7	NC_026145.1_-_XP_011087223.1	108	63	63	0	91.3	1	1	TGCAGAAGCTGTTTTCTTTGGTAGACCAGACTTCAGTTCCAGACAATCCAGATTCTTTACAAAACCAAG	TGCAGAAGCTGTTTTCTCTCGTAGACCAGACTTCTGTACCAGACAACCCCGATTCTTTACAAAACCAAG	69	3591	NC_026145.1_-_XP_011087223.1 Sesamum indicum cultivar Zhongzhi No. 13 linkage group LG1, S_indicum_v1.0, whole genome shotgun sequence	DNA-directed RNA polymerase I subunit 2
	1312	NC_026145.1 - XP_020549256.1	94.203	69	4	0	1	69	453	521	6.42e-24	107	NC_026145.1_-_XP_020549256.1	118	65	65	0	94.2	1	1	TGCAGAAGCTTCAGCAGCACCTAAAGAAACAGAAAGACAGCTTTCCAAGAAGGAGAGAAGGAAAAAGGA	TGTAGAAGCTTCTCCAGCACCTAAAGAGACAGAAAGACAGCTTTCCAAGAAGGAGAGAAGGAAAAAGGA	69	954	NC_026145.1_-_XP_020549256.1 Sesamum indicum cultivar Zhongzhi No. 13 linkage group LG1, S_indicum_v1.0, whole genome shotgun sequence	LOW QUALITY PROTEIN: VID27-like protein
	1312	NC_026150.1 - XP_011081870.1	91.304	69	6	0	1	69	459	527	3.32e-21	98.7	NC_026150.1_-_XP_011081870.1	108	63	63	0	91.3	1	1	TGCAGAAGCTTCAGCAGCACCTAAAGAAACAGAAAGACAGCTTTCCAAGAAGGAGAGAAGGAAAAAGGA	TGTAGAAGTTTCTCCAGCACCTAAAGACACAGAAAGACAGCTTTCCAAGAAGGAAAGAAGGAAAAAGGA	69	990	NC_026150.1_-_XP_011081870.1 Sesamum indicum cultivar Zhongzhi No. 13 linkage group LG6, S_indicum_v1.0, whole genome shotgun sequence	KNR4/SMI1 homolog
	1319	NC_026147.1 - XP_011072373.1	81.159	69	13	0	1	69	1591	1523	1.96e-11	67.1	NC_026147.1_-_XP_011072373.1	73	56	56	0	81.16	1	-1	TGCAGAAGCTTCTATTCATTCTCTGTGCTAATTTCAGTATGCTTTTCCTCCCAACAAGAGTAGCCACAC	TGCAAAAGCTCCAGGTCATTCTGTGTGCCAACTTCAGAATGCTTTTCCTCCCAGCAAGTGTGGCAACAC	69	2274	NC_026147.1_-_XP_011072373.1 Sesamum indicum cultivar Zhongzhi No. 13 linkage group LG3, S_indicum_v1.0, whole genome shotgun sequence	homeobox-leucine zipper protein GLABRA 2 isoform X2
	1319	NC_026147.1 - XP_020548412.1	81.159	69	13	0	1	69	1591	1523	1.96e-11	67.1	NC_026147.1_-_XP_020548412.1	73	56	56	0	81.16	1	-1	TGCAGAAGCTTCTATTCATTCTCTGTGCTAATTTCAGTATGCTTTTCCTCCCAACAAGAGTAGCCACAC	TGCAAAAGCTCCAGGTCATTCTGTGTGCCAACTTCAGAATGCTTTTCCTCCCAGCAAGTGTGGCAACAC	69	1980	NC_026147.1_-_XP_020548412.1 Sesamum indicum cultivar Zhongzhi No. 13 linkage group LG3, S_indicum_v1.0, whole genome shotgun sequence	homeobox-leucine zipper protein GLABRA 2 isoform X2
	1326	NC_026146.1 - XP_011069447.1	84.058	69	11	0	1	69	2262	2330	3.79e-14	76.1	NC_026146.1_-_XP_011069447.1	83	58	58	0	84.06	1	1	TGCAGAAGCTTTGGTTGAGGATGTTGTTTCAGCTATAACAAAGGTTTTAGGTGAAGGATCGTTTGAGGG	TGCAGAAGCTCTGGCTGAGGATGTTGTTTCCGCAATAACAAGAGTATTAGGAGAAGGATCATTAGAAGG	69	6396	NC_026146.1_-_XP_011069447.1 Sesamum indicum cultivar Zhongzhi No. 13 linkage group LG2, S_indicum_v1.0, whole genome shotgun sequence	protein CELLULOSE SYNTHASE INTERACTIVE 3 isoform X2
	1326	NC_026146.1 - XP_011069454.1	84.058	69	11	0	1	69	2262	2330	3.79e-14	76.1	NC_026146.1_-_XP_011069454.1	83	58	58	0	84.06	1	1	TGCAGAAGCTTTGGTTGAGGATGTTGTTTCAGCTATAACAAAGGTTTTAGGTGAAGGATCGTTTGAGGG	TGCAGAAGCTCTGGCTGAGGATGTTGTTTCCGCAATAACAAGAGTATTAGGAGAAGGATCATTAGAAGG	69	6396	NC_026146.1_-_XP_011069454.1 Sesamum indicum cultivar Zhongzhi No. 13 linkage group LG2, S_indicum_v1.0, whole genome shotgun sequence	protein CELLULOSE SYNTHASE INTERACTIVE 3 isoform X2
	1336	NC_026151.1 - NP_001291331.1	88	50	6	0	18	67	767	718	6.86e-11	64.4	NC_026151.1_-_NP_001291331.1	70	44	44	0	88	1	-1	ATGGGCAAGCCAAATACACGAGTTTGAGACTCTTCTAGGCCGTCCAGCAA	ATGGGCAAGCCAAATACACGAATTTGAGATTCTTCGAGCCCATCTAGCAA	69	1428	NC_026151.1_-_NP_001291331.1 Sesamum indicum cultivar Zhongzhi No. 13 linkage group LG7, S_indicum_v1.0, whole genome shotgun sequence	monogalactosyldiacylglycerol synthase 2, chloroplastic-like
	1343	NC_026150.1 - XP_011080282.1	81.538	65	12	0	1	65	1583	1647	6.86e-11	64.4	NC_026150.1_-_XP_011080282.1	70	53	53	0	81.54	1	1	TGCAGAAGGACATTATCGTGAAAGATAATGCTCCAGGAGGGATGATAGAGTACCGGAAATCCTTA	TGGAGAAAGACATTGTGCTGAAGGAAGATGCACCAGGAGGGATGGTAGAATTCCGGAAATCCTTA	69	4073	NC_026150.1_-_XP_011080282.1 Sesamum indicum cultivar Zhongzhi No. 13 linkage group LG6, S_indicum_v1.0, whole genome shotgun sequence	xanthine dehydrogenase 1
	1344	NC_026150.1 - XP_011080282.1	81.538	65	12	0	1	65	1583	1647	6.86e-11	64.4	NC_026150.1_-_XP_011080282.1	70	53	53	0	81.54	1	1	TGCAGAAGGACATTATCGTGAAAGATAATGCTCCAGGAGGGATGATAGAGTACCGGAAATCCTTA	TGGAGAAAGACATTGTGCTGAAGGAAGATGCACCAGGAGGGATGGTAGAATTCCGGAAATCCTTA	69	4073	NC_026150.1_-_XP_011080282.1 Sesamum indicum cultivar Zhongzhi No. 13 linkage group LG6, S_indicum_v1.0, whole genome shotgun sequence	xanthine dehydrogenase 1
	1348	NC_026159.1 - XP_011098901.1	94.203	69	4	0	1	69	996	1064	6.42e-24	107	NC_026159.1_-_XP_011098901.1	118	65	65	0	94.2	1	1	TGCAGAAGGAGCAGTAAGAATCAAGAAACAAAGGCCACACAGAGGGGAGGATTTCACTATGATGGAGGC	TGCAGAAGGAGCAGTTAGAATCAAGAAAAGAAGGCCACACAGAGGGGAGGATTTCACTTTGATGGAGGC	69	1770	NC_026159.1_-_XP_011098901.1 Sesamum indicum cultivar Zhongzhi No. 13 linkage group LG15, S_indicum_v1.0, whole genome shotgun sequence	protein NUCLEAR FUSION DEFECTIVE 4-like
	1349	NC_026147.1 - XP_011074622.1	89.552	67	7	0	3	69	61	127	1.72e-18	90.6	NC_026147.1_-_XP_011074622.1	99	60	60	0	89.55	1	1	CAGAAGGAGCTGGTGGAGTGGCAGGTGAATCCGCCCTCCGGTTTCAAGCACAAAGCCACTGATAATC	CAGAAAGAGCTGGTGGAGTGGCAGGTGAATCCTCCTGCGGGTTTCAAGCACAAAGTTACTGATAATC	69	486	NC_026147.1_-_XP_011074622.1 Sesamum indicum cultivar Zhongzhi No. 13 linkage group LG3, S_indicum_v1.0, whole genome shotgun sequence	probable ubiquitin-conjugating enzyme E2 18
	1349	NC_026151.1 - XP_011083612.1	88.406	69	8	0	1	69	59	127	1.72e-18	89.7	NC_026151.1_-_XP_011083612.1	98	61	61	0	88.41	1	1	TGCAGAAGGAGCTGGTGGAGTGGCAGGTGAATCCGCCCTCCGGTTTCAAGCACAAAGCCACTGATAATC	TGCAGAAAGAGCTGGTGGAGTGGCAGGTGAATCCTCCTGCGGGTTTCAAGCATAAAGTTACTGATAATC	69	486	NC_026151.1_-_XP_011083612.1 Sesamum indicum cultivar Zhongzhi No. 13 linkage group LG7, S_indicum_v1.0, whole genome shotgun sequence	probable ubiquitin-conjugating enzyme E2 18
	1355	NC_026155.1 - XP_011094609.1	82.609	69	12	0	1	69	1530	1462	4.62e-13	71.6	NC_026155.1_-_XP_011094609.1	78	57	57	0	82.61	1	-1	TGCAGAAGGATCATAGAATCTCTCAATGAGGGAGACGACCGTGCTTTTACCAGAACCACTGCTTCCGAC	TGAAGTAGGATCATAAAATCTCTCAATTAGGGATACGATTGTGCTTTTTCCGGAGCCGCTGCTTCCAAC	69	4137	NC_026155.1_-_XP_011094609.1 Sesamum indicum cultivar Zhongzhi No. 13 linkage group LG11, S_indicum_v1.0, whole genome shotgun sequence	ABC transporter B family member 1
	1355	NC_026149.1 - XP_011077318.1	83.871	62	10	0	8	69	1472	1411	5.63e-12	68	NC_026149.1_-_XP_011077318.1	74	52	52	0	83.87	1	-1	GGATCATAGAATCTCTCAATGAGGGAGACGACCGTGCTTTTACCAGAACCACTGCTTCCGAC	GGATCATAGAATCTCTCAATGAGGGATACCACTGTGCTTTTTCCGGAGCCGCTACTACCTAC	69	4050	NC_026149.1_-_XP_011077318.1 Sesamum indicum cultivar Zhongzhi No. 13 linkage group LG5, S_indicum_v1.0, whole genome shotgun sequence	ABC transporter B family member 1
	1361	NC_026158.1 - XP_011097921.1	87.692	65	8	0	5	69	238	302	2.56e-16	82.4	NC_026158.1_-_XP_011097921.1	90	57	57	0	87.69	1	1	GAAGGATTGTGTTGGGCAAGAACAGCAGAGAGACAGAGCTCTAGGATGAGACTGGAGTACCTGAA	GAAGGATTATGTTGGGCAAGAACGGCAGAGAGACAGACTTCTCGGATGCGATTAGAGTACCTGAA	69	3723	NC_026158.1_-_XP_011097921.1 Sesamum indicum cultivar Zhongzhi No. 13 linkage group LG14, S_indicum_v1.0, whole genome shotgun sequence	putative multidrug resistance protein
	1362	NC_026158.1 - XP_011098288.1	88.406	69	8	0	1	69	804	736	1.72e-18	89.7	NC_026158.1_-_XP_011098288.1	98	61	61	0	88.41	1	-1	TGCAGAAGGCAAAGCAAGCTTCAAGGTTGTAAACACATGACTCAAGGACTCCAAAGTAAATCCATCCCA	TGCAGAAGGCAAAGCGAGCTTCAAGTTTGTGAAAACATGGCTCAACGACTCCCAAGTAAATCCCTCCCA	69	1449	NC_026158.1_-_XP_011098288.1 Sesamum indicum cultivar Zhongzhi No. 13 linkage group LG14, S_indicum_v1.0, whole genome shotgun sequence	protein DETOXIFICATION 18 isoform X3
	1362	NC_026158.1 - XP_020554420.1	88.406	69	8	0	1	69	804	736	1.72e-18	89.7	NC_026158.1_-_XP_020554420.1	98	61	61	0	88.41	1	-1	TGCAGAAGGCAAAGCAAGCTTCAAGGTTGTAAACACATGACTCAAGGACTCCAAAGTAAATCCATCCCA	TGCAGAAGGCAAAGCGAGCTTCAAGTTTGTGAAAACATGGCTCAACGACTCCCAAGTAAATCCCTCCCA	69	1392	NC_026158.1_-_XP_020554420.1 Sesamum indicum cultivar Zhongzhi No. 13 linkage group LG14, S_indicum_v1.0, whole genome shotgun sequence	protein DETOXIFICATION 18 isoform X3
	1376	NC_026158.1 - XP_011098238.1	91.667	60	5	0	10	69	435	494	2.1e-17	86.9	NC_026158.1_-_XP_011098238.1	95	55	55	0	91.67	1	1	CCGGCCATATGCTGCAATATGTGCAGCTCCTGCTGTGGCACTTGGGTCATGGGGCCTGTT	CCGGCCATATGCTGCAATATGTGCTGCTCCTGCAGTTGCGCTTGGCTCATGGGGCCTGTT	69	1317	NC_026158.1_-_XP_011098238.1 Sesamum indicum cultivar Zhongzhi No. 13 linkage group LG14, S_indicum_v1.0, whole genome shotgun sequence	protein DJ-1 homolog B
	1385	NC_026152.1 - XP_011086711.1	83.582	67	11	0	3	69	2965	3031	4.62e-13	72.5	NC_026152.1_-_XP_011086711.1	79	56	56	0	83.58	1	1	CAGAAGGGAAAAGAGGAAGCTTCTTCGCAAACAAGCAAGTATGAGGAACTTCTTGAGAGTAAAAAAG	CAGAAGGAAAAAGAGAAAGCTTCTTCTCATACAATCAAGTTTGAAGAACTTTCTATGAGTAAAAAAG	69	5727	NC_026152.1_-_XP_011086711.1 Sesamum indicum cultivar Zhongzhi No. 13 linkage group LG8, S_indicum_v1.0, whole genome shotgun sequence	myosin-16 isoform X2
	1385	NC_026152.1 - XP_011086712.1	83.582	67	11	0	3	69	2965	3031	4.62e-13	72.5	NC_026152.1_-_XP_011086712.1	79	56	56	0	83.58	1	1	CAGAAGGGAAAAGAGGAAGCTTCTTCGCAAACAAGCAAGTATGAGGAACTTCTTGAGAGTAAAAAAG	CAGAAGGAAAAAGAGAAAGCTTCTTCTCATACAATCAAGTTTGAAGAACTTTCTATGAGTAAAAAAG	69	5727	NC_026152.1_-_XP_011086712.1 Sesamum indicum cultivar Zhongzhi No. 13 linkage group LG8, S_indicum_v1.0, whole genome shotgun sequence	myosin-16 isoform X2
	1387	NC_026146.1 - XP_011071107.1	89.706	68	7	0	2	69	315	382	4.93e-19	92.4	NC_026146.1_-_XP_011071107.1	101	61	61	0	89.71	1	1	GCAGAAGGGAAAAGTGAAGCCTGTACACATTGTTGATGTTCCCGGGCATTCACGTCTTAGACCCAAAC	GCAGAAGGGAAAAATAAAGCCTGTTCATATTGTTGATGTTCCTGGGCATTCTCGTCTTCGACCCAAAC	69	789	NC_026146.1_-_XP_011071107.1 Sesamum indicum cultivar Zhongzhi No. 13 linkage group LG2, S_indicum_v1.0, whole genome shotgun sequence	signal recognition particle receptor subunit beta isoform X2
	1387	NC_026146.1 - XP_011071108.1	89.394	66	7	0	4	69	314	379	6.01e-18	88.7	NC_026146.1_-_XP_011071108.1	97	59	59	0	89.39	1	1	AGAAGGGAAAAGTGAAGCCTGTACACATTGTTGATGTTCCCGGGCATTCACGTCTTAGACCCAAAC	AGAAGGGAAAAATAAAGCCTGTTCATATTGTTGATGTTCCTGGGCATTCTCGTCTTCGACCCAAAC	69	786	NC_026146.1_-_XP_011071108.1 Sesamum indicum cultivar Zhongzhi No. 13 linkage group LG2, S_indicum_v1.0, whole genome shotgun sequence	signal recognition particle receptor subunit beta isoform X2
	1393	NC_026146.1 - XP_011069953.1	89.706	68	7	0	2	69	347	280	4.93e-19	92.4	NC_026146.1_-_XP_011069953.1	101	61	61	0	89.71	1	-1	GCAGAAGGGCAACGACTTGCTAGTTCAGCATAGCAGAATGCAGAAAGAGCAGCCGCTATTCCAGCAAT	GCAGAAGGGCAACGGCTCGCTAGCTCGGCATAGCAGAAAGCAGAAAGAGCAGCTGCTATTCCAGCTAT	69	1962	NC_026146.1_-_XP_011069953.1 Sesamum indicum cultivar Zhongzhi No. 13 linkage group LG2, S_indicum_v1.0, whole genome shotgun sequence	cationic amino acid transporter 2, vacuolar
	1393	NC_026149.1 - XP_011079112.1	88.235	68	8	0	2	69	329	262	6.01e-18	87.8	NC_026149.1_-_XP_011079112.1	96	60	60	0	88.24	1	-1	GCAGAAGGGCAACGACTTGCTAGTTCAGCATAGCAGAATGCAGAAAGAGCAGCCGCTATTCCAGCAAT	GCGGAAGGGAAACGACTTGCTAGCTCTGCATAGCAGAAAGCAGAGAGAGCAGCTGCTATTCCAGCTAT	69	1941	NC_026149.1_-_XP_011079112.1 Sesamum indicum cultivar Zhongzhi No. 13 linkage group LG5, S_indicum_v1.0, whole genome shotgun sequence	cationic amino acid transporter 3, mitochondrial-like
	1400	NC_026150.1 - XP_011082485.1	92.453	53	4	0	1	53	643	695	3.11e-15	78.8	NC_026150.1_-_XP_011082485.1	86	49	49	0	92.45	1	1	TGCAGAAGGGGCAGGTTAGGGTGGAACATTATGCATCGAAGAGGACGAAATTC	TGCAGAAGGGGCAGGTTAGGGTGGAGCATTACGCATCTAAGAGGACGAAGTTC	69	1247	NC_026150.1_-_XP_011082485.1 Sesamum indicum cultivar Zhongzhi No. 13 linkage group LG6, S_indicum_v1.0, whole genome shotgun sequence	autophagy-related protein 18a-like
	1400	NC_026150.1 - XP_011079695.1	90.566	53	5	0	1	53	740	792	1.32e-13	74.3	NC_026150.1_-_XP_011079695.1	81	48	48	0	90.57	1	1	TGCAGAAGGGGCAGGTTAGGGTGGAACATTATGCATCGAAGAGGACGAAATTC	TGCAGAAGGGGCAGGTTAGGGCGGAACATTACGCCTCAAAGAGGACTAAATTC	69	1347	NC_026150.1_-_XP_011079695.1 Sesamum indicum cultivar Zhongzhi No. 13 linkage group LG6, S_indicum_v1.0, whole genome shotgun sequence	autophagy-related protein 18a
	1405	NC_026152.1 - XP_011087158.1	89.286	56	6	0	7	62	263	208	3.79e-14	75.2	NC_026152.1_-_XP_011087158.1	82	50	50	0	89.29	1	-1	AGGGTGTTGAGGCCAGCAACAAACAGTAGAGTCTGAATTACTTTTGCTTTCTCCTC	AGGGTGTTCAAGCCCGCAACAAACAACAGAGTCTGAATAACTTTTGCTTTCTCCTC	69	1596	NC_026152.1_-_XP_011087158.1 Sesamum indicum cultivar Zhongzhi No. 13 linkage group LG8, S_indicum_v1.0, whole genome shotgun sequence	nucleobase-ascorbate transporter 6
	1405	NC_026152.1 - XP_011087159.1	89.286	56	6	0	7	62	263	208	3.79e-14	75.2	NC_026152.1_-_XP_011087159.1	82	50	50	0	89.29	1	-1	AGGGTGTTGAGGCCAGCAACAAACAGTAGAGTCTGAATTACTTTTGCTTTCTCCTC	AGGGTGTTCAAGCCCGCAACAAACAACAGAGTCTGAATAACTTTTGCTTTCTCCTC	69	1596	NC_026152.1_-_XP_011087159.1 Sesamum indicum cultivar Zhongzhi No. 13 linkage group LG8, S_indicum_v1.0, whole genome shotgun sequence	nucleobase-ascorbate transporter 6
	1418	NC_026157.1 - XP_011097444.1	88.406	69	8	0	1	69	174	242	1.72e-18	89.7	NC_026157.1_-_XP_011097444.1	98	61	61	0	88.41	1	1	TGCAGAAGGTCCAAGAGGCTTGTACAAAGGCATGGGAGCCCCACTTGCTACTGTGGCAGCCTTCAACGC	TGCAGAAGGTCCACGGGGTTTGTACAAGGGCATGGGCGCCCCACTTGCCACCGTGGCAGCCTTCAATGC	69	894	NC_026157.1_-_XP_011097444.1 Sesamum indicum cultivar Zhongzhi No. 13 linkage group LG13, S_indicum_v1.0, whole genome shotgun sequence	mitochondrial carnitine/acylcarnitine carrier-like protein
	1418	NC_026157.1 - XP_011097446.1	88.406	69	8	0	1	69	174	242	1.72e-18	89.7	NC_026157.1_-_XP_011097446.1	98	61	61	0	88.41	1	1	TGCAGAAGGTCCAAGAGGCTTGTACAAAGGCATGGGAGCCCCACTTGCTACTGTGGCAGCCTTCAACGC	TGCAGAAGGTCCACGGGGTTTGTACAAGGGCATGGGCGCCCCACTTGCCACCGTGGCAGCCTTCAATGC	69	894	NC_026157.1_-_XP_011097446.1 Sesamum indicum cultivar Zhongzhi No. 13 linkage group LG13, S_indicum_v1.0, whole genome shotgun sequence	mitochondrial carnitine/acylcarnitine carrier-like protein
	1419	NC_026153.1 - XP_011089729.1	89.855	69	7	0	1	69	368	436	1.41e-19	94.2	NC_026153.1_-_XP_011089729.1	103	62	62	0	89.86	1	1	TGCAGAAGGTCTACAAGAGCTTCCGGACTAGACGAAAGCTAGCAGATTGTGCTGTTATGATTGAGCAGA	TGCAGAAGGTGTACAAAAGCTTCCGGACTAGGAGAAAGCTAGCAGATTGCGCTGTTCTTATTGAGCAGA	69	1833	NC_026153.1_-_XP_011089729.1 Sesamum indicum cultivar Zhongzhi No. 13 linkage group LG9, S_indicum_v1.0, whole genome shotgun sequence	IQ domain-containing protein IQM2
	1421	NC_026155.1 - XP_011093633.1	88.406	69	8	0	1	69	672	604	1.72e-18	89.7	NC_026155.1_-_XP_011093633.1	98	61	61	0	88.41	1	-1	TGCAGAAGGTCTGACGCCTCCTAGGGCAGTGTATAATGCCAATTTTCCAACCGGTATCCCCATTCCCTG	TGCAGAAGGTCTGACCCCTCCAAGGGCAGTGTACAAAGCCAATTTCCCCACTGGTATTCCCATTCCCTG	69	1776	NC_026155.1_-_XP_011093633.1 Sesamum indicum cultivar Zhongzhi No. 13 linkage group LG11, S_indicum_v1.0, whole genome shotgun sequence	NADP-dependent malic enzyme
	1421	NC_026149.1 - XP_011078255.1	86.154	65	9	0	5	69	668	604	1.09e-14	77.9	NC_026149.1_-_XP_011078255.1	85	56	56	0	86.15	1	-1	GAAGGTCTGACGCCTCCTAGGGCAGTGTATAATGCCAATTTTCCAACCGGTATCCCCATTCCCTG	GAAGGCCTCACTCCTCCTAAGGCAGTGTACAAAGCCAATTTCCCGACCGGTATCCCCATGCCCTG	69	1776	NC_026149.1_-_XP_011078255.1 Sesamum indicum cultivar Zhongzhi No. 13 linkage group LG5, S_indicum_v1.0, whole genome shotgun sequence	NADP-dependent malic enzyme
	1423	NC_026147.1 - XP_011071519.1	89.855	69	7	0	1	69	921	853	1.41e-19	94.2	NC_026147.1_-_XP_011071519.1	103	62	62	0	89.86	1	-1	TGCAGAAGGTCTGTCCTTGGGATCAAAAGCAAGCATTCTTTGTAAGAGGCGAAGAGCAAAGGGATCAGC	TGCAGAAGGTCTGTCCTTAGGATCAAAAGCAAGCATTCTTTCTAACAAGCGAAGAGCAAGGGGGTCGGC	69	1695	NC_026147.1_-_XP_011071519.1 Sesamum indicum cultivar Zhongzhi No. 13 linkage group LG3, S_indicum_v1.0, whole genome shotgun sequence	mitogen-activated protein kinase 15
	1423	NC_026154.1 - XP_011090812.1	89.855	69	7	0	1	69	921	853	1.41e-19	94.2	NC_026154.1_-_XP_011090812.1	103	62	62	0	89.86	1	-1	TGCAGAAGGTCTGTCCTTGGGATCAAAAGCAAGCATTCTTTGTAAGAGGCGAAGAGCAAAGGGATCAGC	TGCAGAAGGTCTATCCTTGGGGTCAAAAGCAAGCATTCTTTCTAACAAGCGAAGAGCAAGGGGGTCAGC	69	1602	NC_026154.1_-_XP_011090812.1 Sesamum indicum cultivar Zhongzhi No. 13 linkage group LG10, S_indicum_v1.0, whole genome shotgun sequence	mitogen-activated protein kinase 16
	1434	NC_026152.1 - XP_011087151.1	91.304	69	6	0	1	69	927	859	3.32e-21	98.7	NC_026152.1_-_XP_011087151.1	108	63	63	0	91.3	1	-1	TGCAGAAGTAACCTCGGAGAAACTGAGATCTGGATATGGCATGTCACAGCAATATATCTCCCATAAACA	TGCTGAAGTCACCTCGGAGAAACTTAGATCAGGATACGGCATGTCACAACAATATATCTCCCATAAACA	69	1146	NC_026152.1_-_XP_011087151.1 Sesamum indicum cultivar Zhongzhi No. 13 linkage group LG8, S_indicum_v1.0, whole genome shotgun sequence	serine/threonine-protein kinase STY8-like
	1434	NC_026159.1 - XP_011098491.1	88.235	68	8	0	2	69	881	814	6.01e-18	87.8	NC_026159.1_-_XP_011098491.1	96	60	60	0	88.24	1	-1	GCAGAAGTAACCTCGGAGAAACTGAGATCTGGATATGGCATGTCACAGCAATATATCTCCCATAAACA	GCTGAAGTCAATTCTGAGAAACTGAGGTCTGGATACGGCATGTCACAGCAATATATCTCCCATAAGCA	69	1101	NC_026159.1_-_XP_011098491.1 Sesamum indicum cultivar Zhongzhi No. 13 linkage group LG15, S_indicum_v1.0, whole genome shotgun sequence	serine/threonine-protein kinase STY8
	1439	NC_026153.1 - XP_011089505.1	86.957	69	9	0	1	69	542	610	7.32e-17	85.1	NC_026153.1_-_XP_011089505.1	93	60	60	0	86.96	1	1	TGCAGAAGTACAGGCTGTATGTGAAGAGGATGCAGGGGTTGTCCAACGAAGGACCATCGCCGTCCGATC	TGCAGAAGTATAGGCTATATGTTAAGAGGATGCAGGGTTTATCCAACGAGGGCCCCTCGCCGTCGGATC	69	975	NC_026153.1_-_XP_011089505.1 Sesamum indicum cultivar Zhongzhi No. 13 linkage group LG9, S_indicum_v1.0, whole genome shotgun sequence	transcription factor LUX
	1439	NC_026153.1 - XP_020552586.1	86.957	69	9	0	1	69	542	610	7.32e-17	85.1	NC_026153.1_-_XP_020552586.1	93	60	60	0	86.96	1	1	TGCAGAAGTACAGGCTGTATGTGAAGAGGATGCAGGGGTTGTCCAACGAAGGACCATCGCCGTCCGATC	TGCAGAAGTATAGGCTATATGTTAAGAGGATGCAGGGTTTATCCAACGAGGGCCCCTCGCCGTCGGATC	69	975	NC_026153.1_-_XP_020552586.1 Sesamum indicum cultivar Zhongzhi No. 13 linkage group LG9, S_indicum_v1.0, whole genome shotgun sequence	transcription factor LUX
	1449	NC_026157.1 - XP_011097044.1	82.609	69	12	0	1	69	2114	2046	4.62e-13	71.6	NC_026157.1_-_XP_011097044.1	78	57	57	0	82.61	1	-1	TGCAGAAGTAGTTTCTTCTGCGAGGCGTTGATAAGACCCTTACACTCTGCATCCACCAACACATCCGTC	TGAAGAAGTAATTTTTTCTGAGTCGCATTGATAACACCCTTACATTCCGCATCCACCAAAACCTCCGTC	69	2139	NC_026157.1_-_XP_011097044.1 Sesamum indicum cultivar Zhongzhi No. 13 linkage group LG13, S_indicum_v1.0, whole genome shotgun sequence	diacylglycerol kinase 2
	1469	NC_026151.1 - XP_011084090.1	93.22	59	1	1	1	56	2715	2657	6.01e-18	87.8	NC_026151.1_-_XP_011084090.1	96	55	55	3	93.22	1	-1	TGCAGAAGTCTCTTCATCTTCAACAAC---GTGTTCTTCCTTTTCTCCTTTCTTATCTG	TGCAGAAGTCTCTTCATCTTCAACAACAATGTGTTCTTCCTTTTCTCCTCTCTTATCTG	69	3162	NC_026151.1_-_XP_011084090.1 Sesamum indicum cultivar Zhongzhi No. 13 linkage group LG7, S_indicum_v1.0, whole genome shotgun sequence	probable sucrose-phosphate synthase 1
	1469	NC_026149.1 - XP_011078416.1	85	60	6	1	2	58	2717	2658	1.96e-11	67.1	NC_026149.1_-_XP_011078416.1	73	51	51	3	85	1	-1	GCAGAAGTCTCTTCATCTT---CAACAACGTGTTCTTCCTTTTCTCCTTTCTTATCTGTT	GCCGAAGTCTCTTCATCTTCCACAACAATGTGTTCCTCTTTTTCTCCCTTTTTATCTGTT	69	3165	NC_026149.1_-_XP_011078416.1 Sesamum indicum cultivar Zhongzhi No. 13 linkage group LG5, S_indicum_v1.0, whole genome shotgun sequence	probable sucrose-phosphate synthase 1
	1470	NC_026145.1 - XP_011089816.2	88.235	68	8	0	1	68	380	313	6.01e-18	87.8	NC_026145.1_-_XP_011089816.2	96	60	60	0	88.24	1	-1	TGCAGAAGTCTTGCGAGTCTCTTCTGCCTACTGCTCCAGAAATTCTTGACATCGTTGTCTGTTCTTCC	TGCAGAATTCTTGCCAGCCTCTTCTGCCTGCTGCTCCAGAAATTCTTCACATCATTATCTGTCCTTCC	69	969	NC_026145.1_-_XP_011089816.2 Sesamum indicum cultivar Zhongzhi No. 13 linkage group LG1, S_indicum_v1.0, whole genome shotgun sequence	myb-related protein MYBAS2-like
	1470	NC_026155.1 - XP_011093325.1	86.765	68	9	0	1	68	395	328	2.56e-16	83.3	NC_026155.1_-_XP_011093325.1	91	59	59	0	86.76	1	-1	TGCAGAAGTCTTGCGAGTCTCTTCTGCCTACTGCTCCAGAAATTCTTGACATCGTTGTCTGTTCTTCC	TGCAGAATTCTTGCCAGCCTTTTCTGCCTGCTGCTCCAGAAATTCTTGACATCATTGTCGGTCCGTCC	69	951	NC_026155.1_-_XP_011093325.1 Sesamum indicum cultivar Zhongzhi No. 13 linkage group LG11, S_indicum_v1.0, whole genome shotgun sequence	transcription factor MYB63-like
	1475	NC_026150.1 - XP_011080929.1	93.846	65	4	0	1	65	2291	2227	9.52e-22	100	NC_026150.1_-_XP_011080929.1	110	61	61	0	93.85	1	-1	TGCAGAAGTGAACTTGGCGGACCAGGAGATATATTCTGGAGCAAAACCATTGGCAGAAGAGTGCT	TGCAGAAGTGTACTTGGTGGACCAGGAGATATATTCTGGAACAAAACCATAGGCAGAAGAGTGCT	69	2703	NC_026150.1_-_XP_011080929.1 Sesamum indicum cultivar Zhongzhi No. 13 linkage group LG6, S_indicum_v1.0, whole genome shotgun sequence	beta-adaptin-like protein B
	1475	NC_026145.1 - XP_011073062.1	89.855	69	7	0	1	69	2282	2214	1.41e-19	94.2	NC_026145.1_-_XP_011073062.1	103	62	62	0	89.86	1	-1	TGCAGAAGTGAACTTGGCGGACCAGGAGATATATTCTGGAGCAAAACCATTGGCAGAAGAGTGCTTGCA	TGCAGAAGTGTACTTGGTGGACCGGGAGATAAATTCTGGAACAGAACCATAGGCAGAAGAGTGCTTGCA	69	2691	NC_026145.1_-_XP_011073062.1 Sesamum indicum cultivar Zhongzhi No. 13 linkage group LG1, S_indicum_v1.0, whole genome shotgun sequence	beta-adaptin-like protein C
	1489	NC_026147.1 - XP_011074771.1	85.507	69	10	0	1	69	2239	2307	8.92e-16	80.6	NC_026147.1_-_XP_011074771.1	88	59	59	0	85.51	1	1	TGCAGAAGTGGCTCCGGATTGGTTCGGATCTGGGGAACATCTCCTGACTCCATCGATGCTGCTGAGGAT	TGCAGAAGTGGTTCTGGACTTGTTCGCATCTGGGGCACATCCCCTGATTCTATAGATGCTGCTGAGGAT	69	3564	NC_026147.1_-_XP_011074771.1 Sesamum indicum cultivar Zhongzhi No. 13 linkage group LG3, S_indicum_v1.0, whole genome shotgun sequence	carbamoyl-phosphate synthase large chain, chloroplastic
	1493	NC_026149.1 - XP_020549537.1	86.885	61	8	0	9	69	440	380	3.79e-14	75.2	NC_026149.1_-_XP_020549537.1	82	53	53	0	86.89	1	-1	TTACGAATGCTGGGAATGTAATCAGCAAGTAGAAGACGGATGCACCGGGAGTGTCCATTTA	TTAGGAATGCTGGGAATGTGATCAGCAAGGAGAAGCCGAATGCACCGGGCATGGCCATTTA	69	1551	NC_026149.1_-_XP_020549537.1 Sesamum indicum cultivar Zhongzhi No. 13 linkage group LG5, S_indicum_v1.0, whole genome shotgun sequence	probable E3 ubiquitin-protein ligase XBOS32 isoform X2
	1493	NC_026149.1 - XP_020549536.1	86.885	61	8	0	9	69	440	380	3.79e-14	75.2	NC_026149.1_-_XP_020549536.1	82	53	53	0	86.89	1	-1	TTACGAATGCTGGGAATGTAATCAGCAAGTAGAAGACGGATGCACCGGGAGTGTCCATTTA	TTAGGAATGCTGGGAATGTGATCAGCAAGGAGAAGCCGAATGCACCGGGCATGGCCATTTA	69	1551	NC_026149.1_-_XP_020549536.1 Sesamum indicum cultivar Zhongzhi No. 13 linkage group LG5, S_indicum_v1.0, whole genome shotgun sequence	probable E3 ubiquitin-protein ligase XBOS32 isoform X2
	1498	NC_026152.1 - XP_011087608.1	93.75	64	4	0	6	69	1872	1809	3.32e-21	98.7	NC_026152.1_-_XP_011087608.1	108	60	60	0	93.75	1	-1	AAGTTCAACCGTCTTGCATAGGGCTTTGAACATTTCCTTGTCCTCTGATATCACAAAAGCCACT	AAGTTCAACCGTCTTGCATAGAGCTTTGAACATTTCCTCTTCCTCTGAAATCACAAAAGCCACT	69	3222	NC_026152.1_-_XP_011087608.1 Sesamum indicum cultivar Zhongzhi No. 13 linkage group LG8, S_indicum_v1.0, whole genome shotgun sequence	methionine S-methyltransferase isoform X2
	1498	NC_026152.1 - XP_011087609.1	93.75	64	4	0	6	69	1869	1806	3.32e-21	98.7	NC_026152.1_-_XP_011087609.1	108	60	60	0	93.75	1	-1	AAGTTCAACCGTCTTGCATAGGGCTTTGAACATTTCCTTGTCCTCTGATATCACAAAAGCCACT	AAGTTCAACCGTCTTGCATAGAGCTTTGAACATTTCCTCTTCCTCTGAAATCACAAAAGCCACT	69	3219	NC_026152.1_-_XP_011087609.1 Sesamum indicum cultivar Zhongzhi No. 13 linkage group LG8, S_indicum_v1.0, whole genome shotgun sequence	methionine S-methyltransferase isoform X2
	1501	NC_026146.1 - XP_011069963.1	91.379	58	5	0	10	67	1065	1008	2.56e-16	83.3	NC_026146.1_-_XP_011069963.1	91	53	53	0	91.38	1	-1	TCAGCCAAACGTCTCAATGAGGAAACCCTTTTAGATGCTCATGAACTTGGCTACAAAT	TCAGCCAAATGTCTCAATGAGGAAGCCCTTGTAGATGCTCATAAACTTGGCCACAAAT	69	1065	NC_026146.1_-_XP_011069963.1 Sesamum indicum cultivar Zhongzhi No. 13 linkage group LG2, S_indicum_v1.0, whole genome shotgun sequence	replication factor C subunit 3
	1515	NC_026150.1 - XP_020549896.1	84.483	58	9	0	2	59	173	116	6.86e-11	65.3	NC_026150.1_-_XP_020549896.1	71	49	49	0	84.48	1	-1	GCAGAAGTTGTGTGGAAGCATGAATAAGCTGTTGGGTCTCCCATGCCCAAAGAAATCA	GCAGAAGTCGTGTAAAAACAAGAATACGCAGTTGGGTCCCCCATCCCCAAAGAAATCA	69	1338	NC_026150.1_-_XP_020549896.1 Sesamum indicum cultivar Zhongzhi No. 13 linkage group LG6, S_indicum_v1.0, whole genome shotgun sequence	probable aminotransferase TAT2
	1516	NC_026150.1 - XP_020549896.1	84.483	58	9	0	2	59	173	116	6.86e-11	65.3	NC_026150.1_-_XP_020549896.1	71	49	49	0	84.48	1	-1	GCAGAAGTTGTGTGGAAGCATGAATAAGCTGTTGGGTCTCCCATGCCCAAAGAAATCA	GCAGAAGTCGTGTAAAAACAAGAATACGCAGTTGGGTCCCCCATCCCCAAAGAAATCA	69	1338	NC_026150.1_-_XP_020549896.1 Sesamum indicum cultivar Zhongzhi No. 13 linkage group LG6, S_indicum_v1.0, whole genome shotgun sequence	probable aminotransferase TAT2
	1525	NC_026156.1 - XP_020554045.1	85.484	62	9	0	1	62	2525	2586	4.62e-13	72.5	NC_026156.1_-_XP_020554045.1	79	53	53	0	85.48	1	1	TGCAGAAGTTTGGTATCCTTCCAGAGATGTACCAAGTTGGTTCTACAAAGTTATTCTTCCGA	TGCAGCAATTTGATATCCTTCCTGAGATGTACCAAGTTGGTTATAAGAAATTATACTTCCGA	69	3639	NC_026156.1_-_XP_020554045.1 Sesamum indicum cultivar Zhongzhi No. 13 linkage group LG12, S_indicum_v1.0, whole genome shotgun sequence	myosin-2 isoform X2
	1525	NC_026156.1 - XP_020554046.1	85.484	62	9	0	1	62	2030	2091	4.62e-13	72.5	NC_026156.1_-_XP_020554046.1	79	53	53	0	85.48	1	1	TGCAGAAGTTTGGTATCCTTCCAGAGATGTACCAAGTTGGTTCTACAAAGTTATTCTTCCGA	TGCAGCAATTTGATATCCTTCCTGAGATGTACCAAGTTGGTTATAAGAAATTATACTTCCGA	69	3144	NC_026156.1_-_XP_020554046.1 Sesamum indicum cultivar Zhongzhi No. 13 linkage group LG12, S_indicum_v1.0, whole genome shotgun sequence	myosin-2 isoform X2
	1533	NC_026150.1 - XP_011080960.1	88	50	6	0	20	69	846	797	6.86e-11	64.4	NC_026150.1_-_XP_011080960.1	70	44	44	0	88	1	-1	TACAGGTTGTAAGGCAAGACCAGCCCGAAATTTCCGTATCATATCAGCTT	TATAGGCTGTAAGGCAAGACCAGCCCGGAACTTCCTTATCATATCAGTTT	69	1581	NC_026150.1_-_XP_011080960.1 Sesamum indicum cultivar Zhongzhi No. 13 linkage group LG6, S_indicum_v1.0, whole genome shotgun sequence	glutamate--cysteine ligase, chloroplastic-like
	1535	NC_026149.1 - XP_011078587.1	86.364	66	9	0	4	69	968	1033	3.11e-15	79.7	NC_026149.1_-_XP_011078587.1	87	57	57	0	86.36	1	1	AGAATAAATGGAGAGGAATACCGACAAGACTGAATAACATTCCTCACTCTAGAGAAATCAGGACAT	AGAAAAATTGGAGAGGCATACCAACGAGACTGAATAATATTCCTCATTCAAGAGAAATCAGGAAAT	69	1833	NC_026149.1_-_XP_011078587.1 Sesamum indicum cultivar Zhongzhi No. 13 linkage group LG5, S_indicum_v1.0, whole genome shotgun sequence	adenylate kinase 5, chloroplastic isoform X3
	1535	NC_026149.1 - XP_020549694.1	86.364	66	9	0	4	69	968	1033	3.11e-15	79.7	NC_026149.1_-_XP_020549694.1	87	57	57	0	86.36	1	1	AGAATAAATGGAGAGGAATACCGACAAGACTGAATAACATTCCTCACTCTAGAGAAATCAGGACAT	AGAAAAATTGGAGAGGCATACCAACGAGACTGAATAATATTCCTCATTCAAGAGAAATCAGGAAAT	69	1812	NC_026149.1_-_XP_020549694.1 Sesamum indicum cultivar Zhongzhi No. 13 linkage group LG5, S_indicum_v1.0, whole genome shotgun sequence	adenylate kinase 5, chloroplastic isoform X3
	1544	NC_026149.1 - XP_011078979.1	83.871	62	10	0	1	62	62	1	5.63e-12	68	NC_026149.1_-_XP_011078979.1	74	52	52	0	83.87	1	-1	TGCAGAATAAGCAGTGATATCAGAAGCTTCACTCTCTCAGAAACTATGCTTTCCTGTGCCAT	TGCAGAACAAACAATGAAATCAGAAGCTTCACTCTCTCAGAAATGACCTTTTCTTGTGCCAT	69	1104	NC_026149.1_-_XP_011078979.1 Sesamum indicum cultivar Zhongzhi No. 13 linkage group LG5, S_indicum_v1.0, whole genome shotgun sequence	WAT1-related protein At3g18200
	1546	NC_026156.1 - XP_011096597.1	89.706	68	7	0	2	69	248	181	4.93e-19	92.4	NC_026156.1_-_XP_011096597.1	101	61	61	0	89.71	1	-1	GCAGAATAAGCTGAGAGGAAGTCTATATATCTTTTGCCTTCCGGATCCCAGATAGACGATCCTTTGGC	GCAGAATAAGCTGAGAGGAAGTCTACATACTTGTTGCCTTCTGGATCCCAGATAGATGATCCTTTAGC	69	1425	NC_026156.1_-_XP_011096597.1 Sesamum indicum cultivar Zhongzhi No. 13 linkage group LG12, S_indicum_v1.0, whole genome shotgun sequence	ornithine aminotransferase, mitochondrial
	1551	NC_026152.1 - XP_011088623.1	91.045	67	6	0	3	69	31	97	4.05e-20	95.1	NC_026152.1_-_XP_011088623.1	104	61	61	0	91.04	1	1	CAGAATAATCTGCTGTACATACAGAGTTTTACCAAGGCAGATGATGCGCTCAAGCTTCATCATATTG	CAGAACAATCCGCTCTACATACAGAGTTTTACCGAGGCAGATGATGCACTCAAGCTTCATCACATTG	69	432	NC_026152.1_-_XP_011088623.1 Sesamum indicum cultivar Zhongzhi No. 13 linkage group LG8, S_indicum_v1.0, whole genome shotgun sequence	trafficking protein particle complex subunit 2-like protein
	1551	NC_026154.1 - XP_011092963.1	84.615	65	10	0	3	67	31	95	1.32e-13	73.4	NC_026154.1_-_XP_011092963.1	80	55	55	0	84.62	1	1	CAGAATAATCTGCTGTACATACAGAGTTTTACCAAGGCAGATGATGCGCTCAAGCTTCATCATAT	CAGAACAATCCGCTCTACATACAGAGTTTCACTGAAGCAGATGATGCCCTTAAGCTTCATCACAT	69	432	NC_026154.1_-_XP_011092963.1 Sesamum indicum cultivar Zhongzhi No. 13 linkage group LG10, S_indicum_v1.0, whole genome shotgun sequence	trafficking protein particle complex subunit 2-like protein
	1579	NC_026147.1 - XP_011073770.1	87.097	62	8	0	6	67	1066	1127	1.09e-14	77	NC_026147.1_-_XP_011073770.1	84	54	54	0	87.1	1	1	AATACTGTATTTGGTGGAAAGCCTACAGCACCTGATTACAACCATATCGCTTGTGCTGTGTT	AAAACTGTGTTTGGTGGACAGCCTACTGCACCTGATTATGACCATATTCCTTGTGCTGTGTT	69	1491	NC_026147.1_-_XP_011073770.1 Sesamum indicum cultivar Zhongzhi No. 13 linkage group LG3, S_indicum_v1.0, whole genome shotgun sequence	glutathione reductase, chloroplastic
	1579	NC_026147.1 - XP_011073771.1	87.097	62	8	0	6	67	1066	1127	1.09e-14	77	NC_026147.1_-_XP_011073771.1	84	54	54	0	87.1	1	1	AATACTGTATTTGGTGGAAAGCCTACAGCACCTGATTACAACCATATCGCTTGTGCTGTGTT	AAAACTGTGTTTGGTGGACAGCCTACTGCACCTGATTATGACCATATTCCTTGTGCTGTGTT	69	1491	NC_026147.1_-_XP_011073771.1 Sesamum indicum cultivar Zhongzhi No. 13 linkage group LG3, S_indicum_v1.0, whole genome shotgun sequence	glutathione reductase, chloroplastic
	1621	NC_026153.1 - XP_011090200.1	84.746	59	9	0	2	60	1106	1048	1.96e-11	67.1	NC_026153.1_-_XP_011090200.1	73	50	50	0	84.75	1	-1	GCAGAATATCTCAAGTCGATTTTCCGGTGGTTTACAAAGTAGTCATAGACGGTCACTTC	GCAGAAAATCGCAAATTAATGTTTCGGTGGTTGACAAAGTAGTCATAGACAGTCACTTC	69	2733	NC_026153.1_-_XP_011090200.1 Sesamum indicum cultivar Zhongzhi No. 13 linkage group LG9, S_indicum_v1.0, whole genome shotgun sequence	protein argonaute 4-like
	1621	NC_026153.1 - XP_011090194.1	84.746	59	9	0	2	60	1106	1048	1.96e-11	67.1	NC_026153.1_-_XP_011090194.1	73	50	50	0	84.75	1	-1	GCAGAATATCTCAAGTCGATTTTCCGGTGGTTTACAAAGTAGTCATAGACGGTCACTTC	GCAGAAAATCGCAAATTAATGTTTCGGTGGTTGACAAAGTAGTCATAGACAGTCACTTC	69	2733	NC_026153.1_-_XP_011090194.1 Sesamum indicum cultivar Zhongzhi No. 13 linkage group LG9, S_indicum_v1.0, whole genome shotgun sequence	protein argonaute 4-like
	1625	NC_026153.1 - XP_011090126.1	95.455	66	3	0	1	66	594	659	2.24e-23	106	NC_026153.1_-_XP_011090126.1	117	63	63	0	95.45	1	1	TGCAGAATATGAGCGTCGCAGGGAGAACTTTTTCAAGGAGATAGAAATTGTTTTTGCAGATGTGGT	TGCAGAATATGAGCGTCGCAGGGAGAACTTTTTCAAGGAGCTCGAAATTGTTTTTGCTGATGTGGT	69	1212	NC_026153.1_-_XP_011090126.1 Sesamum indicum cultivar Zhongzhi No. 13 linkage group LG9, S_indicum_v1.0, whole genome shotgun sequence	protein RETICULATA-RELATED 4, chloroplastic
	1625	NC_026153.1 - XP_011090125.1	95.455	66	3	0	1	66	594	659	2.24e-23	106	NC_026153.1_-_XP_011090125.1	117	63	63	0	95.45	1	1	TGCAGAATATGAGCGTCGCAGGGAGAACTTTTTCAAGGAGATAGAAATTGTTTTTGCAGATGTGGT	TGCAGAATATGAGCGTCGCAGGGAGAACTTTTTCAAGGAGCTCGAAATTGTTTTTGCTGATGTGGT	69	1212	NC_026153.1_-_XP_011090125.1 Sesamum indicum cultivar Zhongzhi No. 13 linkage group LG9, S_indicum_v1.0, whole genome shotgun sequence	protein RETICULATA-RELATED 4, chloroplastic
	1629	NC_026151.1 - XP_011084891.1	86.154	65	9	0	3	67	4954	5018	1.09e-14	77.9	NC_026151.1_-_XP_011084891.1	85	56	56	0	86.15	1	1	CAGAATATGTATGCACAGTTGTTGCCTCTTGCTTTACCAGCACCGCCAATGCCTGGTATGGGAGG	CAGAATATGTATGCCCAGTTACTGCCTCTTGCTTTGCCAGCTCCACCTATGCCAGGCATGGGAGG	69	5121	NC_026151.1_-_XP_011084891.1 Sesamum indicum cultivar Zhongzhi No. 13 linkage group LG7, S_indicum_v1.0, whole genome shotgun sequence	clathrin heavy chain 2
	1629	NC_026148.1 - XP_011076674.1	86.154	65	9	0	3	67	4927	4991	1.09e-14	77.9	NC_026148.1_-_XP_011076674.1	85	56	56	0	86.15	1	1	CAGAATATGTATGCACAGTTGTTGCCTCTTGCTTTACCAGCACCGCCAATGCCTGGTATGGGAGG	CAGAATATGTACGCCCAGTTGCTGCCCCTTGCTTTACCTGCACCACCTATGCCAGGCATGGGAGG	69	5118	NC_026148.1_-_XP_011076674.1 Sesamum indicum cultivar Zhongzhi No. 13 linkage group LG4, S_indicum_v1.0, whole genome shotgun sequence	LOW QUALITY PROTEIN: clathrin heavy chain 1-like
	1643	NC_026154.1 - XP_011092956.1	92.754	69	5	0	1	69	777	845	2.73e-22	103	NC_026154.1_-_XP_011092956.1	113	64	64	0	92.75	1	1	TGCAGAATATTTGGCATATGAATGCGGAAAGCATGTCCTCGTCATATTGACAGATATGAGTTCTTATGC	TGCAGAGTACTTGGCATATGAATGCGGGAAGCATGTGCTTGTCATATTGACAGATATGAGTTCTTATGC	69	1467	NC_026154.1_-_XP_011092956.1 Sesamum indicum cultivar Zhongzhi No. 13 linkage group LG10, S_indicum_v1.0, whole genome shotgun sequence	V-type proton ATPase subunit B 2
	1643	NC_026152.1 - XP_020552119.1	91.304	69	6	0	1	69	774	842	3.32e-21	98.7	NC_026152.1_-_XP_020552119.1	108	63	63	0	91.3	1	1	TGCAGAATATTTGGCATATGAATGCGGAAAGCATGTCCTCGTCATATTGACAGATATGAGTTCTTATGC	TGCAGAGTATTTAGCATATGAATGTGGGAAGCATGTTCTTGTCATATTGACAGATATGAGTTCTTATGC	69	1464	NC_026152.1_-_XP_020552119.1 Sesamum indicum cultivar Zhongzhi No. 13 linkage group LG8, S_indicum_v1.0, whole genome shotgun sequence	V-type proton ATPase subunit B1
	1660	NC_026150.1 - XP_011082583.1	86.885	61	8	0	9	69	633	573	3.79e-14	75.2	NC_026150.1_-_XP_011082583.1	82	53	53	0	86.89	1	-1	CACGACAGTTGCTGCTCCTCCCATAAACCCTAATATCGCTGCATGCGACAGGAAATCCACG	CACCACCGTAGCTGCTCCCCCCATGAACCCTACTATCGTTGCATGCGACAGAAAATCCACG	69	1992	NC_026150.1_-_XP_011082583.1 Sesamum indicum cultivar Zhongzhi No. 13 linkage group LG6, S_indicum_v1.0, whole genome shotgun sequence	sulfate transporter 3.1-like
	1660	NC_026150.1 - XP_011079899.1	82.353	68	12	0	1	68	641	574	1.61e-12	69.8	NC_026150.1_-_XP_011079899.1	76	56	56	0	82.35	1	-1	TGCAGAATCACGACAGTTGCTGCTCCTCCCATAAACCCTAATATCGCTGCATGCGACAGGAAATCCAC	TGGAGACACACAACCGTCGCTGCTCCTCCCATGAACCCTACGATGGTTGCATGCGACAGAAAATCCAC	69	1989	NC_026150.1_-_XP_011079899.1 Sesamum indicum cultivar Zhongzhi No. 13 linkage group LG6, S_indicum_v1.0, whole genome shotgun sequence	sulfate transporter 3.1
	1661	NC_026154.1 - XP_011092014.1	86.567	67	9	0	2	68	566	632	8.92e-16	81.5	NC_026154.1_-_XP_011092014.1	89	58	58	0	86.57	1	1	GCAGAATCACTATCTTCTATTTTGCCAAGGAGGGAGAAAGCTGTAAATTCACACCAGTTTATCCGGA	GCAGTATTACTATCTTCTATTTTGCCAAGGAGGGGGACAACTGTAGATTTACTCCAGTATATCCGGA	69	1194	NC_026154.1_-_XP_011092014.1 Sesamum indicum cultivar Zhongzhi No. 13 linkage group LG10, S_indicum_v1.0, whole genome shotgun sequence	probable E3 ubiquitin-protein ligase LUL4 isoform X2
	1661	NC_026154.1 - XP_011092015.1	86.567	67	9	0	2	68	566	632	8.92e-16	81.5	NC_026154.1_-_XP_011092015.1	89	58	58	0	86.57	1	1	GCAGAATCACTATCTTCTATTTTGCCAAGGAGGGAGAAAGCTGTAAATTCACACCAGTTTATCCGGA	GCAGTATTACTATCTTCTATTTTGCCAAGGAGGGGGACAACTGTAGATTTACTCCAGTATATCCGGA	69	1182	NC_026154.1_-_XP_011092015.1 Sesamum indicum cultivar Zhongzhi No. 13 linkage group LG10, S_indicum_v1.0, whole genome shotgun sequence	probable E3 ubiquitin-protein ligase LUL4 isoform X2
	1664	NC_026149.1 - XP_011078119.1	91.176	68	6	0	2	69	710	643	1.16e-20	96.9	NC_026149.1_-_XP_011078119.1	106	62	62	0	91.18	1	-1	GCAGAATCAGCTATTAGAGTGGCAGGAATATTGTCATGTACCAACTCAAAAGCGGTAAGTCTTGATCC	GCAGAATCAGCAATTAGAGTTGCAGGAATATTGTCATGTACCAACTCAAATGCTGTGAGTCTTGAACC	69	1125	NC_026149.1_-_XP_011078119.1 Sesamum indicum cultivar Zhongzhi No. 13 linkage group LG5, S_indicum_v1.0, whole genome shotgun sequence	methylthioribose-1-phosphate isomerase
	1666	NC_026145.1 - XP_020549360.1	86.957	69	9	0	1	69	807	739	7.32e-17	85.1	NC_026145.1_-_XP_020549360.1	93	60	60	0	86.96	1	-1	TGCAGAATCAGTAATTACTGTTGTTTGTAGGCCTGTGGCAGCCAGTTCTTTTGCAAAAGCATGCCCCTG	TGCAGAATCAGTAATAACAGTAGTCTGTAGCCCCCTTGCAGCCAGTTCTTTTGCAAGAGCATGCCCCTG	69	1248	NC_026145.1_-_XP_020549360.1 Sesamum indicum cultivar Zhongzhi No. 13 linkage group LG1, S_indicum_v1.0, whole genome shotgun sequence	translation initiation factor eIF-2B subunit beta
	1666	NC_026145.1 - XP_011088474.1	86.957	69	9	0	1	69	807	739	7.32e-17	85.1	NC_026145.1_-_XP_011088474.1	93	60	60	0	86.96	1	-1	TGCAGAATCAGTAATTACTGTTGTTTGTAGGCCTGTGGCAGCCAGTTCTTTTGCAAAAGCATGCCCCTG	TGCAGAATCAGTAATAACAGTAGTCTGTAGCCCCCTTGCAGCCAGTTCTTTTGCAAGAGCATGCCCCTG	69	1248	NC_026145.1_-_XP_011088474.1 Sesamum indicum cultivar Zhongzhi No. 13 linkage group LG1, S_indicum_v1.0, whole genome shotgun sequence	translation initiation factor eIF-2B subunit beta
	1668	NC_026145.1 - XP_011088033.1	90.385	52	5	0	1	52	2382	2433	4.62e-13	72.5	NC_026145.1_-_XP_011088033.1	79	47	47	0	90.38	1	1	TGCAGAATCAGTTGCTATTATTACTCCTGAGCTTCAGCAGGCCTTCCTGGAG	TGCAGAATCCATTGCTCCAATTACTCCTGAGCTTCAGCAGGCCTTCCTGGAG	69	3159	NC_026145.1_-_XP_011088033.1 Sesamum indicum cultivar Zhongzhi No. 13 linkage group LG1, S_indicum_v1.0, whole genome shotgun sequence	structural maintenance of chromosomes protein 5
	1668	NC_026145.1 - XP_011088042.1	90.385	52	5	0	1	52	2382	2433	4.62e-13	72.5	NC_026145.1_-_XP_011088042.1	79	47	47	0	90.38	1	1	TGCAGAATCAGTTGCTATTATTACTCCTGAGCTTCAGCAGGCCTTCCTGGAG	TGCAGAATCCATTGCTCCAATTACTCCTGAGCTTCAGCAGGCCTTCCTGGAG	69	3159	NC_026145.1_-_XP_011088042.1 Sesamum indicum cultivar Zhongzhi No. 13 linkage group LG1, S_indicum_v1.0, whole genome shotgun sequence	structural maintenance of chromosomes protein 5
	1682	NC_026146.1 - XP_011070909.1	84.058	69	11	0	1	69	1430	1362	3.79e-14	76.1	NC_026146.1_-_XP_011070909.1	83	58	58	0	84.06	1	-1	TGCAGAATCATCGAAAGGGCCACTTTGGCTTCAACGGTTGCAAAGTTTAGTCCGAGACAAGTTCTTGGT	TGCAGAATCATCGAAAGTGCTATTTTTGCTTCCGTCATTGCAAAGTTTAATCCGACACAAGTTCTTGGT	69	1533	NC_026146.1_-_XP_011070909.1 Sesamum indicum cultivar Zhongzhi No. 13 linkage group LG2, S_indicum_v1.0, whole genome shotgun sequence	cytochrome P450 CYP749A22-like
	1695	NC_026150.1 - XP_011083308.1	88.406	69	8	0	1	69	771	703	1.72e-18	89.7	NC_026150.1_-_XP_011083308.1	98	61	61	0	88.41	1	-1	TGCAGAATCCATTGTGTTTACTGCAAACCATGCATGCATTGAGGTATACGTCTTCTTATCCGTGACCAC	TGCAGAATCAATTCTGTTTACTGCAAACCATGCATACATGGATGTGTACGTCTTCTTGTCAGTGACCAC	69	1578	NC_026150.1_-_XP_011083308.1 Sesamum indicum cultivar Zhongzhi No. 13 linkage group LG6, S_indicum_v1.0, whole genome shotgun sequence	probable galacturonosyltransferase 15
	1695	NC_026158.1 - XP_011098075.1	85.507	69	10	0	1	69	849	781	8.92e-16	80.6	NC_026158.1_-_XP_011098075.1	88	59	59	0	85.51	1	-1	TGCAGAATCCATTGTGTTTACTGCAAACCATGCATGCATTGAGGTATACGTCTTCTTATCCGTGACCAC	TGCAGAATCAATTTTGTTGACTGCAAACCATGCATGCATCGAAGTGTACGACTTCTTGTCAGTGACTAC	69	1656	NC_026158.1_-_XP_011098075.1 Sesamum indicum cultivar Zhongzhi No. 13 linkage group LG14, S_indicum_v1.0, whole genome shotgun sequence	probable galacturonosyltransferase 15 isoform X3
	1703	NC_026149.1 - XP_011078923.1	92.754	69	5	0	1	69	290	358	2.73e-22	103	NC_026149.1_-_XP_011078923.1	113	64	64	0	92.75	1	1	TGCAGAATCCTCATGCAGTTCAGGAATTGAGGGCTGACAAACAGTACAATCTCCATATGCTTACAGATC	TGCAGAATCCTAATGCAGTTCAGGAATTGAGGGCTGACAAACAGTACAATCTTCAGATGCTTAATGATC	69	1317	NC_026149.1_-_XP_011078923.1 Sesamum indicum cultivar Zhongzhi No. 13 linkage group LG5, S_indicum_v1.0, whole genome shotgun sequence	eukaryotic translation initiation factor 3 subunit E
	1703	NC_026148.1 - XP_011075359.1	88.406	69	8	0	1	69	290	358	1.72e-18	89.7	NC_026148.1_-_XP_011075359.1	98	61	61	0	88.41	1	1	TGCAGAATCCTCATGCAGTTCAGGAATTGAGGGCTGACAAACAGTACAATCTCCATATGCTTACAGATC	TGCACAATCCTAATGCATTTCAGGAACTGAGGGCTGACAAACAGTACAATCTTCAGATGCTTAGTGATC	69	1317	NC_026148.1_-_XP_011075359.1 Sesamum indicum cultivar Zhongzhi No. 13 linkage group LG4, S_indicum_v1.0, whole genome shotgun sequence	eukaryotic translation initiation factor 3 subunit E
	1713	NC_026150.1 - XP_020550491.1	86.957	69	9	0	1	69	843	775	7.32e-17	85.1	NC_026150.1_-_XP_020550491.1	93	60	60	0	86.96	1	-1	TGCAGAATCGCTCTCCCCAGCAGCAGATATGTGACTCATGAAGATAGCCTTGGTCGACCGAGGTATCAG	TGCAGAATCACTCTCCCCTGCAGCAGATATGTGAGTCATAAAGATAGCCTTAGATGATCGTGGTATCAG	69	2481	NC_026150.1_-_XP_020550491.1 Sesamum indicum cultivar Zhongzhi No. 13 linkage group LG6, S_indicum_v1.0, whole genome shotgun sequence	serine/threonine-protein kinase EDR1-like isoform X3
	1713	NC_026150.1 - XP_011083003.1	86.957	69	9	0	1	69	843	775	7.32e-17	85.1	NC_026150.1_-_XP_011083003.1	93	60	60	0	86.96	1	-1	TGCAGAATCGCTCTCCCCAGCAGCAGATATGTGACTCATGAAGATAGCCTTGGTCGACCGAGGTATCAG	TGCAGAATCACTCTCCCCTGCAGCAGATATGTGAGTCATAAAGATAGCCTTAGATGATCGTGGTATCAG	69	2481	NC_026150.1_-_XP_011083003.1 Sesamum indicum cultivar Zhongzhi No. 13 linkage group LG6, S_indicum_v1.0, whole genome shotgun sequence	serine/threonine-protein kinase EDR1-like isoform X3
	1714	NC_026150.1 - XP_020550491.1	86.957	69	9	0	1	69	843	775	7.32e-17	85.1	NC_026150.1_-_XP_020550491.1	93	60	60	0	86.96	1	-1	TGCAGAATCGCTCTCCCCAGCAGCAGATATGTGACTCATGAAGATAGCCTTGGTCGACCGAGGTATCAG	TGCAGAATCACTCTCCCCTGCAGCAGATATGTGAGTCATAAAGATAGCCTTAGATGATCGTGGTATCAG	69	2481	NC_026150.1_-_XP_020550491.1 Sesamum indicum cultivar Zhongzhi No. 13 linkage group LG6, S_indicum_v1.0, whole genome shotgun sequence	serine/threonine-protein kinase EDR1-like isoform X3
	1714	NC_026150.1 - XP_011083003.1	86.957	69	9	0	1	69	843	775	7.32e-17	85.1	NC_026150.1_-_XP_011083003.1	93	60	60	0	86.96	1	-1	TGCAGAATCGCTCTCCCCAGCAGCAGATATGTGACTCATGAAGATAGCCTTGGTCGACCGAGGTATCAG	TGCAGAATCACTCTCCCCTGCAGCAGATATGTGAGTCATAAAGATAGCCTTAGATGATCGTGGTATCAG	69	2481	NC_026150.1_-_XP_011083003.1 Sesamum indicum cultivar Zhongzhi No. 13 linkage group LG6, S_indicum_v1.0, whole genome shotgun sequence	serine/threonine-protein kinase EDR1-like isoform X3
	1728	NC_026150.1 - XP_011081524.1	84.058	69	8	1	1	69	2103	2168	1.32e-13	74.3	NC_026150.1_-_XP_011081524.1	81	58	58	3	84.06	1	1	TGCAGAATCTAATACCAAAATGGAGATGCAGAACATTTCTAAAATTGTTGAAGTTTCTCGCTGCCAATC	TGCAGAATCTAT---CAAAGTGGAGATGCCAAATATCTCTAAAATTGTTGAAGTTTCACGCTGTCAATC	69	3222	NC_026150.1_-_XP_011081524.1 Sesamum indicum cultivar Zhongzhi No. 13 linkage group LG6, S_indicum_v1.0, whole genome shotgun sequence	protein TPR3-like isoform X6
	1728	NC_026150.1 - XP_011081518.1	84.058	69	8	1	1	69	2103	2168	1.32e-13	74.3	NC_026150.1_-_XP_011081518.1	81	58	58	3	84.06	1	1	TGCAGAATCTAATACCAAAATGGAGATGCAGAACATTTCTAAAATTGTTGAAGTTTCTCGCTGCCAATC	TGCAGAATCTAT---CAAAGTGGAGATGCCAAATATCTCTAAAATTGTTGAAGTTTCACGCTGTCAATC	69	3222	NC_026150.1_-_XP_011081518.1 Sesamum indicum cultivar Zhongzhi No. 13 linkage group LG6, S_indicum_v1.0, whole genome shotgun sequence	protein TPR3-like isoform X6
	1736	NC_026151.1 - XP_011084891.1	89.091	55	6	0	1	55	1191	1245	1.32e-13	73.4	NC_026151.1_-_XP_011084891.1	80	49	49	0	89.09	1	1	TGCAGAATCTCCACAAGGCATTCTTCGTACACCTGACACTGTTACCAAATTCCAG	TGCAGAATCTCCACAAGGCATCCTCCGGACACCTGATACTGTTGCCAAATTTCAG	69	5121	NC_026151.1_-_XP_011084891.1 Sesamum indicum cultivar Zhongzhi No. 13 linkage group LG7, S_indicum_v1.0, whole genome shotgun sequence	clathrin heavy chain 2
	1736	NC_026148.1 - XP_011076674.1	85.455	55	8	0	1	55	1191	1245	6.86e-11	64.4	NC_026148.1_-_XP_011076674.1	70	47	47	0	85.45	1	1	TGCAGAATCTCCACAAGGCATTCTTCGTACACCTGACACTGTTACCAAATTCCAG	TGCTGAATCTCCACAGGGCATCCTCCGAACACCTGATACTGTTGCCAAATTTCAG	69	5118	NC_026148.1_-_XP_011076674.1 Sesamum indicum cultivar Zhongzhi No. 13 linkage group LG4, S_indicum_v1.0, whole genome shotgun sequence	LOW QUALITY PROTEIN: clathrin heavy chain 1-like
	1737	NC_026151.1 - XP_011084891.1	94.545	55	3	0	1	55	1191	1245	2.1e-17	86.9	NC_026151.1_-_XP_011084891.1	95	52	52	0	94.55	1	1	TGCAGAATCTCCCCAAGGCATCCTCCGGACATCAGATACTGTTGCCAAATTTCAG	TGCAGAATCTCCACAAGGCATCCTCCGGACACCTGATACTGTTGCCAAATTTCAG	69	5121	NC_026151.1_-_XP_011084891.1 Sesamum indicum cultivar Zhongzhi No. 13 linkage group LG7, S_indicum_v1.0, whole genome shotgun sequence	clathrin heavy chain 2
	1737	NC_026148.1 - XP_011076674.1	89.091	55	6	0	1	55	1191	1245	1.32e-13	73.4	NC_026148.1_-_XP_011076674.1	80	49	49	0	89.09	1	1	TGCAGAATCTCCCCAAGGCATCCTCCGGACATCAGATACTGTTGCCAAATTTCAG	TGCTGAATCTCCACAGGGCATCCTCCGAACACCTGATACTGTTGCCAAATTTCAG	69	5118	NC_026148.1_-_XP_011076674.1 Sesamum indicum cultivar Zhongzhi No. 13 linkage group LG4, S_indicum_v1.0, whole genome shotgun sequence	LOW QUALITY PROTEIN: clathrin heavy chain 1-like
	1739	NC_026157.1 - XP_011097339.1	86.957	69	9	0	1	69	530	462	7.32e-17	85.1	NC_026157.1_-_XP_011097339.1	93	60	60	0	86.96	1	-1	TGCAGAATCTCTTTCCCAGGACTCTCAGCCGGGGTCTTACGCTTCAGCCACGGCTCAATTGACTTATAC	TGCAGAATCTCCTTCCCAGGAGTCTCCGGCGGGCTCTTCCTCTTCAACCACGGCTCAATCGACTTATAC	69	837	NC_026157.1_-_XP_011097339.1 Sesamum indicum cultivar Zhongzhi No. 13 linkage group LG13, S_indicum_v1.0, whole genome shotgun sequence	succinate dehydrogenase [ubiquinone] iron-sulfur subunit 2, mitochondrial-like
	1748	NC_026152.1 - XP_011086881.1	89.286	56	6	0	1	56	1221	1276	3.79e-14	75.2	NC_026152.1_-_XP_011086881.1	82	50	50	0	89.29	1	1	TGCAGAATCTGCACTTCGTGCGTTGAATCGGAGTGATATTGCTGGGAAGAAGATTA	TGCAGAATCTGCACTTCGTGCATTGAACAGGAGCGATATTGCTGGAAAGCAGATTA	69	2958	NC_026152.1_-_XP_011086881.1 Sesamum indicum cultivar Zhongzhi No. 13 linkage group LG8, S_indicum_v1.0, whole genome shotgun sequence	protein MEI2-like 4
	1749	NC_026154.1 - XP_020553111.1	87.302	63	8	0	2	64	1348	1410	3.11e-15	78.8	NC_026154.1_-_XP_020553111.1	86	55	55	0	87.3	1	1	GCAGAATCTGCATTCCGTTCACTCCATGAAGGTTCGCCATTAGAAGCCTTCTGGGACAGTTTA	GCTGAATCTGTATTCCGTACACTACATGAAGGCTCACCACTAGAGGCCTTCTGGGACAGTTTA	69	1956	NC_026154.1_-_XP_020553111.1 Sesamum indicum cultivar Zhongzhi No. 13 linkage group LG10, S_indicum_v1.0, whole genome shotgun sequence	electron transfer flavoprotein-ubiquinone oxidoreductase, mitochondrial isoform X2
	1749	NC_026154.1 - XP_011091641.1	87.302	63	8	0	2	64	1348	1410	3.11e-15	78.8	NC_026154.1_-_XP_011091641.1	86	55	55	0	87.3	1	1	GCAGAATCTGCATTCCGTTCACTCCATGAAGGTTCGCCATTAGAAGCCTTCTGGGACAGTTTA	GCTGAATCTGTATTCCGTACACTACATGAAGGCTCACCACTAGAGGCCTTCTGGGACAGTTTA	69	1938	NC_026154.1_-_XP_011091641.1 Sesamum indicum cultivar Zhongzhi No. 13 linkage group LG10, S_indicum_v1.0, whole genome shotgun sequence	electron transfer flavoprotein-ubiquinone oxidoreductase, mitochondrial isoform X2
	1750	NC_026145.1 - XP_011083482.1	87.097	62	8	0	1	62	1973	2034	1.09e-14	77	NC_026145.1_-_XP_011083482.1	84	54	54	0	87.1	1	1	TGCAGAATCTGCCTCCTCAAAGTGATTTATCAGCTTGGAAAGCTATTCATGACTATAAGGTT	TGCAGAATTTGCCTCGTCAAAGTGATTTACCTGCTTGGAAAGCTATGCAGGACTTTAAGTTT	69	2919	NC_026145.1_-_XP_011083482.1 Sesamum indicum cultivar Zhongzhi No. 13 linkage group LG1, S_indicum_v1.0, whole genome shotgun sequence	valine--tRNA ligase, chloroplastic/mitochondrial 2 isoform X3
	1750	NC_026145.1 - XP_011083497.1	87.097	62	8	0	1	62	1967	2028	1.09e-14	77	NC_026145.1_-_XP_011083497.1	84	54	54	0	87.1	1	1	TGCAGAATCTGCCTCCTCAAAGTGATTTATCAGCTTGGAAAGCTATTCATGACTATAAGGTT	TGCAGAATTTGCCTCGTCAAAGTGATTTACCTGCTTGGAAAGCTATGCAGGACTTTAAGTTT	69	2913	NC_026145.1_-_XP_011083497.1 Sesamum indicum cultivar Zhongzhi No. 13 linkage group LG1, S_indicum_v1.0, whole genome shotgun sequence	valine--tRNA ligase, chloroplastic/mitochondrial 2 isoform X3
	1796	NC_026149.1 - XP_011078908.1	89.855	69	7	0	1	69	155	87	1.41e-19	94.2	NC_026149.1_-_XP_011078908.1	103	62	62	0	89.86	1	-1	TGCAGAATGATATACGAATCTCCGGAGTAGAATTTACCATAATCTGGCTTTGGCAAGGGAACTGGTTGG	TGCAGGATGATATATGAATCTCCAGAGTAGAATTTACCATAATCAGATTTTGGCAAAGGAACTGGTTGG	69	2808	NC_026149.1_-_XP_011078908.1 Sesamum indicum cultivar Zhongzhi No. 13 linkage group LG5, S_indicum_v1.0, whole genome shotgun sequence	villin-3-like
	1796	NC_026148.1 - XP_020548939.1	85.507	69	10	0	1	69	155	87	8.92e-16	80.6	NC_026148.1_-_XP_020548939.1	88	59	59	0	85.51	1	-1	TGCAGAATGATATACGAATCTCCGGAGTAGAATTTACCATAATCTGGCTTTGGCAAGGGAACTGGTTGG	TGAAGGATAATATAAGAATCTCCGGAGTAGAATTTTCCATAATCAGATTTCGGCAAAGGAACTGGTTGG	69	2898	NC_026148.1_-_XP_020548939.1 Sesamum indicum cultivar Zhongzhi No. 13 linkage group LG4, S_indicum_v1.0, whole genome shotgun sequence	LOW QUALITY PROTEIN: villin-2
	1797	NC_026149.1 - XP_011078908.1	89.855	69	7	0	1	69	155	87	1.41e-19	94.2	NC_026149.1_-_XP_011078908.1	103	62	62	0	89.86	1	-1	TGCAGAATGATATACGAATCTCCGGAGTAGAATTTACCATAATCTGGCTTTGGCAAGGGAACTGGTTGG	TGCAGGATGATATATGAATCTCCAGAGTAGAATTTACCATAATCAGATTTTGGCAAAGGAACTGGTTGG	69	2808	NC_026149.1_-_XP_011078908.1 Sesamum indicum cultivar Zhongzhi No. 13 linkage group LG5, S_indicum_v1.0, whole genome shotgun sequence	villin-3-like
	1797	NC_026148.1 - XP_020548939.1	85.507	69	10	0	1	69	155	87	8.92e-16	80.6	NC_026148.1_-_XP_020548939.1	88	59	59	0	85.51	1	-1	TGCAGAATGATATACGAATCTCCGGAGTAGAATTTACCATAATCTGGCTTTGGCAAGGGAACTGGTTGG	TGAAGGATAATATAAGAATCTCCGGAGTAGAATTTTCCATAATCAGATTTCGGCAAAGGAACTGGTTGG	69	2898	NC_026148.1_-_XP_020548939.1 Sesamum indicum cultivar Zhongzhi No. 13 linkage group LG4, S_indicum_v1.0, whole genome shotgun sequence	LOW QUALITY PROTEIN: villin-2
	1808	NC_026147.1 - XP_011072504.1	83.824	68	11	0	1	68	314	247	1.32e-13	74.3	NC_026147.1_-_XP_011072504.1	81	57	57	0	83.82	1	-1	TGCAGAATGATTTTACTCACTTCTGCATCACTTGACACAATTGTTGGACTCCCAAATAAATGTGACTT	TGCAGAATGATCCTGCTCACTTCTGCATCAGTCGACACTATTGTCGCACTTCCAAACAAATGCGACTT	69	1446	NC_026147.1_-_XP_011072504.1 Sesamum indicum cultivar Zhongzhi No. 13 linkage group LG3, S_indicum_v1.0, whole genome shotgun sequence	3-epi-6-deoxocathasterone 23-monooxygenase
	1809	NC_026147.1 - XP_011072504.1	83.824	68	11	0	1	68	314	247	1.32e-13	74.3	NC_026147.1_-_XP_011072504.1	81	57	57	0	83.82	1	-1	TGCAGAATGATTTTACTCACTTCTGCATCACTTGACACAATTGTTGGACTCCCAAATAAATGTGACTT	TGCAGAATGATCCTGCTCACTTCTGCATCAGTCGACACTATTGTCGCACTTCCAAACAAATGCGACTT	69	1446	NC_026147.1_-_XP_011072504.1 Sesamum indicum cultivar Zhongzhi No. 13 linkage group LG3, S_indicum_v1.0, whole genome shotgun sequence	3-epi-6-deoxocathasterone 23-monooxygenase
	1810	NC_026152.1 - XP_011087828.1	85.294	68	10	0	2	69	1340	1273	3.11e-15	78.8	NC_026152.1_-_XP_011087828.1	86	58	58	0	85.29	1	-1	GCAGAATGCAAATTCCCCTCTTCCAACCACTTGAGGTGGTTCTCTTTGAACTCCATATGTTGGAGCTT	GCCGAATGTAAATTTCCATCTTCTAGCCACTTGAGGTGGTTTTCTTTGAACTCTATATGTTTAAGCTT	69	1425	NC_026152.1_-_XP_011087828.1 Sesamum indicum cultivar Zhongzhi No. 13 linkage group LG8, S_indicum_v1.0, whole genome shotgun sequence	tRNA (guanine(10)-N2)-methyltransferase homolog
	1822	NC_026155.1 - XP_020553473.1	85.507	69	10	0	1	69	599	531	8.92e-16	80.6	NC_026155.1_-_XP_020553473.1	88	59	59	0	85.51	1	-1	TGCAGAATGCCAAACCACCGGATTTCCTTCATATCTACTCCGTAGGATAAGTCATCTGGTGCATGAGAA	TGGAGAATGCCACACCACCGGATTTTCTTCATGTCGACTCCATAAGATAAATCATCGGGAGCATGAGAA	69	1566	NC_026155.1_-_XP_020553473.1 Sesamum indicum cultivar Zhongzhi No. 13 linkage group LG11, S_indicum_v1.0, whole genome shotgun sequence	heparan-alpha-glucosaminide N-acetyltransferase-like
	1828	NC_026152.1 - XP_011087611.1	88.235	68	8	0	1	68	1049	982	6.01e-18	87.8	NC_026152.1_-_XP_011087611.1	96	60	60	0	88.24	1	-1	TGCAGAATGCGAGCCCTGGCTTCCTCAGTAGGATGAGGAAACTCTATTTTACGATCCAATCGACCAGA	TGCAAAATGCGAGCCCTGGCTTCTTCTGTAGGATGGGGAAATTCAATTTTACGATCCAGCCGACCAGA	69	1269	NC_026152.1_-_XP_011087611.1 Sesamum indicum cultivar Zhongzhi No. 13 linkage group LG8, S_indicum_v1.0, whole genome shotgun sequence	26S protease regulatory subunit 6A homolog A
	1828	NC_026154.1 - XP_011092251.1	86.765	68	9	0	1	68	1049	982	2.56e-16	83.3	NC_026154.1_-_XP_011092251.1	91	59	59	0	86.76	1	-1	TGCAGAATGCGAGCCCTGGCTTCCTCAGTAGGATGAGGAAACTCTATTTTACGATCCAATCGACCAGA	TGCAAAATGCGAGCTCTTGCTTCCTCAGTTGGATGGGGAAATTCAATTTTACGATCCAGCCGACCAGA	69	1269	NC_026154.1_-_XP_011092251.1 Sesamum indicum cultivar Zhongzhi No. 13 linkage group LG10, S_indicum_v1.0, whole genome shotgun sequence	26S protease regulatory subunit 6A homolog
	1832	NC_026154.1 - XP_011091037.1	89.706	68	7	0	1	68	165	232	4.93e-19	92.4	NC_026154.1_-_XP_011091037.1	101	61	61	0	89.71	1	1	TGCAGAATGCTGCAACTCACTCAAGTCCCTCATGAGCAGTGGGAAGGACTGCCTCTGCCTAATCGCCA	TGCAGATTGCTGCAATTCACTCAAGTCCCTCATGAGCAATGGACGGGACTGCCTCTGCCTAATCACCA	69	624	NC_026154.1_-_XP_011091037.1 Sesamum indicum cultivar Zhongzhi No. 13 linkage group LG10, S_indicum_v1.0, whole genome shotgun sequence	non-specific lipid-transfer protein-like protein At2g13820 isoform X2
	1832	NC_026154.1 - XP_020552771.1	89.706	68	7	0	1	68	165	232	4.93e-19	92.4	NC_026154.1_-_XP_020552771.1	101	61	61	0	89.71	1	1	TGCAGAATGCTGCAACTCACTCAAGTCCCTCATGAGCAGTGGGAAGGACTGCCTCTGCCTAATCGCCA	TGCAGATTGCTGCAATTCACTCAAGTCCCTCATGAGCAATGGACGGGACTGCCTCTGCCTAATCACCA	69	621	NC_026154.1_-_XP_020552771.1 Sesamum indicum cultivar Zhongzhi No. 13 linkage group LG10, S_indicum_v1.0, whole genome shotgun sequence	non-specific lipid-transfer protein-like protein At2g13820 isoform X2
	1841	NC_026151.1 - XP_011083685.1	89.474	57	6	0	1	57	1614	1670	1.09e-14	77	NC_026151.1_-_XP_011083685.1	84	51	51	0	89.47	1	1	TGCAGAATGGCCAAAGAGGCTTCATGTTTTTCCTGAATGGATGAACAACAGAGAAAA	TGCAGAATGGCCAAAGAGGCTTCATACCTTTCCCGACTGGATGAACAACAGAGAGAA	69	2181	NC_026151.1_-_XP_011083685.1 Sesamum indicum cultivar Zhongzhi No. 13 linkage group LG7, S_indicum_v1.0, whole genome shotgun sequence	probable methyltransferase PMT28
	1857	NC_026152.1 - XP_020552121.1	85.965	57	8	0	7	63	678	622	5.63e-12	68	NC_026152.1_-_XP_020552121.1	74	49	49	0	85.96	1	-1	ATGTAAAAATGCCAGACCACGAGCTGCTCCAATCAATATTGTAAGCCTAATATTCCA	ATGCAAGAAAGCAAGACCACGAGCTGCTCCAATTAATATCTTAAGCCTAATATCCCA	69	1317	NC_026152.1_-_XP_020552121.1 Sesamum indicum cultivar Zhongzhi No. 13 linkage group LG8, S_indicum_v1.0, whole genome shotgun sequence	probable serine/threonine-protein kinase PIX13 isoform X3
	1857	NC_026152.1 - XP_011088711.1	85.965	57	8	0	7	63	678	622	5.63e-12	68	NC_026152.1_-_XP_011088711.1	74	49	49	0	85.96	1	-1	ATGTAAAAATGCCAGACCACGAGCTGCTCCAATCAATATTGTAAGCCTAATATTCCA	ATGCAAGAAAGCAAGACCACGAGCTGCTCCAATTAATATCTTAAGCCTAATATCCCA	69	1317	NC_026152.1_-_XP_011088711.1 Sesamum indicum cultivar Zhongzhi No. 13 linkage group LG8, S_indicum_v1.0, whole genome shotgun sequence	probable serine/threonine-protein kinase PIX13 isoform X3
	1862	NC_026157.1 - XP_011097263.1	88.406	69	8	0	1	69	1766	1698	1.72e-18	89.7	NC_026157.1_-_XP_011097263.1	98	61	61	0	88.41	1	-1	TGCAGAATGTATCTCCCGTTGTTCATCAAGAAGATCGAGCTGAGTGCGTGGTCTTTGTACAGCTTCGAT	TGCAGAATGTATCTCCCATTGTTCATCATGAAAATGGAGCTCAATGCGTGGTCTTTGTAGAGCTTTGAT	69	2223	NC_026157.1_-_XP_011097263.1 Sesamum indicum cultivar Zhongzhi No. 13 linkage group LG13, S_indicum_v1.0, whole genome shotgun sequence	exocyst complex component EXO70B1
	1871	NC_026152.1 - XP_011086004.1	85	60	9	0	7	66	438	497	5.63e-12	68.9	NC_026152.1_-_XP_011086004.1	75	51	51	0	85	1	1	ATGTTGCTGGGCGTTTTCAGCAGTTGCAGCAACGGAAGGCGTCAACAAGCTAACTACTGG	ATGCTGCTGGGCATTTTCAGCTGTTGCAGCAACAGAAGGAATCAACCAGCTTACAACTGG	69	1026	NC_026152.1_-_XP_011086004.1 Sesamum indicum cultivar Zhongzhi No. 13 linkage group LG8, S_indicum_v1.0, whole genome shotgun sequence	senescence-specific cysteine protease SAG39-like
	1872	NC_026152.1 - XP_011086004.1	85	60	9	0	7	66	438	497	5.63e-12	68.9	NC_026152.1_-_XP_011086004.1	75	51	51	0	85	1	1	ATGTTGCTGGGCGTTTTCAGCAGTTGCAGCAACGGAAGGCGTCAACAAGCTAACTACTGG	ATGCTGCTGGGCATTTTCAGCTGTTGCAGCAACAGAAGGAATCAACCAGCTTACAACTGG	69	1026	NC_026152.1_-_XP_011086004.1 Sesamum indicum cultivar Zhongzhi No. 13 linkage group LG8, S_indicum_v1.0, whole genome shotgun sequence	senescence-specific cysteine protease SAG39-like
	1876	NC_026152.1 - XP_011086326.1	90.164	61	6	0	1	61	3575	3635	7.32e-17	84.2	NC_026152.1_-_XP_011086326.1	92	55	55	0	90.16	1	1	TGCAGAATGTTGTGAACTATCTCCGGCGGTCAAAGGAAATAGCTGAAACAGAGATCTCATT	TGCAAAATGTGGTGAATTATCTTCGACGGACAAAGGAAATAGCTGAAACAGAGATCTCATT	69	6186	NC_026152.1_-_XP_011086326.1 Sesamum indicum cultivar Zhongzhi No. 13 linkage group LG8, S_indicum_v1.0, whole genome shotgun sequence	nuclear-pore anchor
	1876	NC_026152.1 - XP_011086325.1	90.164	61	6	0	1	61	3575	3635	7.32e-17	84.2	NC_026152.1_-_XP_011086325.1	92	55	55	0	90.16	1	1	TGCAGAATGTTGTGAACTATCTCCGGCGGTCAAAGGAAATAGCTGAAACAGAGATCTCATT	TGCAAAATGTGGTGAATTATCTTCGACGGACAAAGGAAATAGCTGAAACAGAGATCTCATT	69	6186	NC_026152.1_-_XP_011086325.1 Sesamum indicum cultivar Zhongzhi No. 13 linkage group LG8, S_indicum_v1.0, whole genome shotgun sequence	nuclear-pore anchor
	1899	NC_026146.1 - XP_011069447.1	85.075	67	10	0	1	67	4083	4149	1.09e-14	77	NC_026146.1_-_XP_011069447.1	84	57	57	0	85.07	1	1	TGCAGAATTATGCTGCGTGCTTTTCGGTAATTCAAGAGTTAGAGAAATGGAAATTGCCTCTGAATGC	TGCAGAGTTGTGCTGCGTGCTTTTTGATAATCCAAGAGTCAGAGAATTGCCAATTGTCTCTGAATGC	69	6396	NC_026146.1_-_XP_011069447.1 Sesamum indicum cultivar Zhongzhi No. 13 linkage group LG2, S_indicum_v1.0, whole genome shotgun sequence	protein CELLULOSE SYNTHASE INTERACTIVE 3 isoform X2
	1899	NC_026146.1 - XP_011069454.1	85.075	67	10	0	1	67	4083	4149	1.09e-14	77	NC_026146.1_-_XP_011069454.1	84	57	57	0	85.07	1	1	TGCAGAATTATGCTGCGTGCTTTTCGGTAATTCAAGAGTTAGAGAAATGGAAATTGCCTCTGAATGC	TGCAGAGTTGTGCTGCGTGCTTTTTGATAATCCAAGAGTCAGAGAATTGCCAATTGTCTCTGAATGC	69	6396	NC_026146.1_-_XP_011069454.1 Sesamum indicum cultivar Zhongzhi No. 13 linkage group LG2, S_indicum_v1.0, whole genome shotgun sequence	protein CELLULOSE SYNTHASE INTERACTIVE 3 isoform X2
	1936	NC_026159.1 - XP_011099892.1	86.957	69	9	0	1	69	1300	1368	7.32e-17	85.1	NC_026159.1_-_XP_011099892.1	93	60	60	0	86.96	1	1	TGCAGAATTGATGGGCCTGCTGCATATGACGTTCTTATAAATTTTGCCCAACGTTGGCGGAAATCAACC	TGCAGAATCGATGGGCCTGCTGCTTATGATGTCCTTATAAACTTCGCTCAGCGTTGGCGGAAAACAACC	69	2589	NC_026159.1_-_XP_011099892.1 Sesamum indicum cultivar Zhongzhi No. 13 linkage group LG15, S_indicum_v1.0, whole genome shotgun sequence	phospholipase D delta
	1937	NC_026153.1 - XP_011089619.1	86.567	67	9	0	1	67	782	716	8.92e-16	81.5	NC_026153.1_-_XP_011089619.1	89	58	58	0	86.57	1	-1	TGCAGAATTGATTTGGACATAGCCATAGCATCAACTGGAACAACCGAGCCAATGAGAAGGCCGGTTA	TGCAAAATAGATTTTGACATAGCAACGGCATCAACTGGAACGACAGAGCCAATGAGAAGGCCTGTTA	69	1269	NC_026153.1_-_XP_011089619.1 Sesamum indicum cultivar Zhongzhi No. 13 linkage group LG9, S_indicum_v1.0, whole genome shotgun sequence	probable sodium/metabolite cotransporter BASS3, chloroplastic
	1941	NC_026160.1 - XP_011100229.1	85.965	57	8	0	1	57	1742	1686	5.63e-12	68	NC_026160.1_-_XP_011100229.1	74	49	49	0	85.96	1	-1	TGCAGAATTGCACGGTCAGTAGACGCTCTTCCTAAATCTTCAGCAAGTTGATAACTC	TGCAAAATTGCTCGGTCAGCGAAGGCTCTGCCTAAATCTTCAGCAAGCTGATAACTC	69	2037	NC_026160.1_-_XP_011100229.1 Sesamum indicum cultivar Zhongzhi No. 13 linkage group LG16, S_indicum_v1.0, whole genome shotgun sequence	acyl-coenzyme A oxidase 3, peroxisomal
	1942	NC_026160.1 - XP_011100229.1	85.965	57	8	0	1	57	1742	1686	5.63e-12	68	NC_026160.1_-_XP_011100229.1	74	49	49	0	85.96	1	-1	TGCAGAATTGCACGGTCAGTAGACGCTCTTCCTAAATCTTCAGCAAGTTGATAACTC	TGCAAAATTGCTCGGTCAGCGAAGGCTCTGCCTAAATCTTCAGCAAGCTGATAACTC	69	2037	NC_026160.1_-_XP_011100229.1 Sesamum indicum cultivar Zhongzhi No. 13 linkage group LG16, S_indicum_v1.0, whole genome shotgun sequence	acyl-coenzyme A oxidase 3, peroxisomal
	1952	NC_026148.1 - XP_011075463.1	81.159	69	10	1	1	69	690	755	6.86e-11	65.3	NC_026148.1_-_XP_011075463.1	71	56	56	3	81.16	1	1	TGCAGAATTGGCAACGGAATCTGCAAAAACGTCTGGTGTTGAAGAAGAGGAAGAAGGATTACCATCTCC	TGCAGAAATTGCAACAGAATCCGTCAAAACTTCTGTTGTTGAAGAAGAG---GAAGGACTACCATCCCC	69	1416	NC_026148.1_-_XP_011075463.1 Sesamum indicum cultivar Zhongzhi No. 13 linkage group LG4, S_indicum_v1.0, whole genome shotgun sequence	probable mediator of RNA polymerase II transcription subunit 26b
	1960	NC_026146.1 - XP_011069938.1	90.476	63	6	0	5	67	630	692	6.01e-18	87.8	NC_026146.1_-_XP_011069938.1	96	57	57	0	90.48	1	1	GAATTGTGATATTTACAAGGGAAAATGGGTGAAAGATGAAGGGTATCCAATCTACACACCAGG	GAATTGTGATATTTACAAGGGAAAATGGGTGAGAGATGAGGGTTATCCACTTTACAGACCAGG	69	1677	NC_026146.1_-_XP_011069938.1 Sesamum indicum cultivar Zhongzhi No. 13 linkage group LG2, S_indicum_v1.0, whole genome shotgun sequence	protein trichome birefringence-like 5
	1964	NC_026154.1 - XP_011091672.1	91.837	49	4	0	5	53	522	570	4.62e-13	71.6	NC_026154.1_-_XP_011091672.1	78	45	45	0	91.84	1	1	GAATTTACGACAGACATTGGATGATCTGACCCGTAATGGTTTCTCTGTT	GAATCTGCGACAGACATTGGATGACCTGACACGTAATGGTTTCTCTGTT	69	1743	NC_026154.1_-_XP_011091672.1 Sesamum indicum cultivar Zhongzhi No. 13 linkage group LG10, S_indicum_v1.0, whole genome shotgun sequence	DNA mismatch repair protein MSH1, mitochondrial-like
	1969	NC_026152.1 - XP_011088655.1	80.882	68	13	0	1	68	1565	1498	6.86e-11	65.3	NC_026152.1_-_XP_011088655.1	71	55	55	0	80.88	1	-1	TGCAGAATTTCCATTATTTCGGAGAAGTCGGGCCTTGATGCTGGATCTTGCTGCCAGCATTTCTCAAG	TGTAGTATTTCTATTAATTCAGAAAAGTCAGGTCTCAAAGCTGGATCTTGCTGCCAGCATCTCTCCAG	69	1659	NC_026152.1_-_XP_011088655.1 Sesamum indicum cultivar Zhongzhi No. 13 linkage group LG8, S_indicum_v1.0, whole genome shotgun sequence	serine/threonine-protein kinase STY46
	1994	NC_026152.1 - XP_011088491.1	85.246	61	9	0	5	65	744	804	1.61e-12	70.7	NC_026152.1_-_XP_011088491.1	77	52	52	0	85.25	1	1	GAATTTTGTTGATTTAGCAGGAAGCGAGCGGGCATCTCAAGCTCACTCAGTTGGACAGAGA	GAACTTTGTCGATTTGGCTGGAAGTGAGCGGGCATCTCAAGCTTTATCAGTTGGCCAGAGA	69	2730	NC_026152.1_-_XP_011088491.1 Sesamum indicum cultivar Zhongzhi No. 13 linkage group LG8, S_indicum_v1.0, whole genome shotgun sequence	kinesin-like protein KIN-7F isoform X2
	1994	NC_026152.1 - XP_011088490.1	85.246	61	9	0	5	65	744	804	1.61e-12	70.7	NC_026152.1_-_XP_011088490.1	77	52	52	0	85.25	1	1	GAATTTTGTTGATTTAGCAGGAAGCGAGCGGGCATCTCAAGCTCACTCAGTTGGACAGAGA	GAACTTTGTCGATTTGGCTGGAAGTGAGCGGGCATCTCAAGCTTTATCAGTTGGCCAGAGA	69	2730	NC_026152.1_-_XP_011088490.1 Sesamum indicum cultivar Zhongzhi No. 13 linkage group LG8, S_indicum_v1.0, whole genome shotgun sequence	kinesin-like protein KIN-7F isoform X2
	2008	NC_026159.1 - XP_011098806.1	84.375	64	10	0	1	64	1206	1143	4.62e-13	71.6	NC_026159.1_-_XP_011098806.1	78	54	54	0	84.38	1	-1	TGCAGACAAAATGTGCCATTTAGGGCCAGTTGTTTTTCTTCCTGATGCTGTGGGATCAGGTGTT	TGCAGACAAGACGTGCCACTTAGGACCAGTTGTTTTGCTTCCTGGTGCCGAGGGATCAATTGTT	69	1650	NC_026159.1_-_XP_011098806.1 Sesamum indicum cultivar Zhongzhi No. 13 linkage group LG15, S_indicum_v1.0, whole genome shotgun sequence	protein WVD2-like 7 isoform X4
	2008	NC_026159.1 - XP_011098807.1	84.375	64	10	0	1	64	1203	1140	4.62e-13	71.6	NC_026159.1_-_XP_011098807.1	78	54	54	0	84.38	1	-1	TGCAGACAAAATGTGCCATTTAGGGCCAGTTGTTTTTCTTCCTGATGCTGTGGGATCAGGTGTT	TGCAGACAAGACGTGCCACTTAGGACCAGTTGTTTTGCTTCCTGGTGCCGAGGGATCAATTGTT	69	1647	NC_026159.1_-_XP_011098807.1 Sesamum indicum cultivar Zhongzhi No. 13 linkage group LG15, S_indicum_v1.0, whole genome shotgun sequence	protein WVD2-like 7 isoform X4
	2016	NC_026155.1 - XP_011095067.1	91.667	48	4	0	22	69	1161	1208	1.61e-12	69.8	NC_026155.1_-_XP_011095067.1	76	44	44	0	91.67	1	1	CTATTCGGATTGCATGCATTGGTGTCTTCCCGGAGTTCCTGATGTTTG	CTATGCAGATTGCATACATTGGTGTCTTCCCGGAGTTCCTGATGTCTG	69	1254	NC_026155.1_-_XP_011095067.1 Sesamum indicum cultivar Zhongzhi No. 13 linkage group LG11, S_indicum_v1.0, whole genome shotgun sequence	protein trichome birefringence-like 34
	2020	NC_026159.1 - XP_011098563.1	92.424	66	5	0	4	69	1229	1294	1.16e-20	97.8	NC_026159.1_-_XP_011098563.1	107	61	61	0	92.42	1	1	AGACAAAGCTGAAAAGTGCGGTTCAGTTGCAAGATCTTTTGGATGCAACACGAATTCTAGTACCTC	AGACGAAGCTGAAAAGTGCCGTTCAGTTGCAAGATCTTTTGGATGCAACAAGGATTTTAGTACCTC	69	3177	NC_026159.1_-_XP_011098563.1 Sesamum indicum cultivar Zhongzhi No. 13 linkage group LG15, S_indicum_v1.0, whole genome shotgun sequence	inositol hexakisphosphate and diphosphoinositol-pentakisphosphate kinase 1 isoform X2
	2020	NC_026159.1 - XP_011098565.1	92.424	66	5	0	4	69	1211	1276	1.16e-20	97.8	NC_026159.1_-_XP_011098565.1	107	61	61	0	92.42	1	1	AGACAAAGCTGAAAAGTGCGGTTCAGTTGCAAGATCTTTTGGATGCAACACGAATTCTAGTACCTC	AGACGAAGCTGAAAAGTGCCGTTCAGTTGCAAGATCTTTTGGATGCAACAAGGATTTTAGTACCTC	69	3159	NC_026159.1_-_XP_011098565.1 Sesamum indicum cultivar Zhongzhi No. 13 linkage group LG15, S_indicum_v1.0, whole genome shotgun sequence	inositol hexakisphosphate and diphosphoinositol-pentakisphosphate kinase 1 isoform X2
	2039	NC_026147.1 - XP_011072046.1	86.441	59	8	0	1	59	2171	2113	4.62e-13	71.6	NC_026147.1_-_XP_011072046.1	78	51	51	0	86.44	1	-1	TGCAGACAACACTGAGAGACAATGCCGAGATTGGTTTCACATATACGCTTCAGATCACC	TGCAGACAGCACTGGGACACAATGCCAAGATCCGTTTCGCATATCCGCTTCAGATCACC	69	3195	NC_026147.1_-_XP_011072046.1 Sesamum indicum cultivar Zhongzhi No. 13 linkage group LG3, S_indicum_v1.0, whole genome shotgun sequence	protein argonaute 1
	2039	NC_026147.1 - XP_011072044.1	86.441	59	8	0	1	59	2171	2113	4.62e-13	71.6	NC_026147.1_-_XP_011072044.1	78	51	51	0	86.44	1	-1	TGCAGACAACACTGAGAGACAATGCCGAGATTGGTTTCACATATACGCTTCAGATCACC	TGCAGACAGCACTGGGACACAATGCCAAGATCCGTTTCGCATATCCGCTTCAGATCACC	69	3195	NC_026147.1_-_XP_011072044.1 Sesamum indicum cultivar Zhongzhi No. 13 linkage group LG3, S_indicum_v1.0, whole genome shotgun sequence	protein argonaute 1
	2067	NC_026149.1 - XP_011078190.1	82.812	64	11	0	6	69	824	887	1.96e-11	67.1	NC_026149.1_-_XP_011078190.1	73	53	53	0	82.81	1	1	ACAAGTTTACTGTTCCATCATTTCTTGAGGCTCTAGAAGACTCTGTTGCTCGAAAAACTGAATC	ACAAATTCACTGTCCCATCATTTCTTGAGGCACTTGAAGATTCTGTTGCCAGAGCATCTGAATC	69	966	NC_026149.1_-_XP_011078190.1 Sesamum indicum cultivar Zhongzhi No. 13 linkage group LG5, S_indicum_v1.0, whole genome shotgun sequence	26S proteasome regulatory subunit RPN13
	2067	NC_026149.1 - XP_011078191.1	82.812	64	11	0	6	69	824	887	1.96e-11	67.1	NC_026149.1_-_XP_011078191.1	73	53	53	0	82.81	1	1	ACAAGTTTACTGTTCCATCATTTCTTGAGGCTCTAGAAGACTCTGTTGCTCGAAAAACTGAATC	ACAAATTCACTGTCCCATCATTTCTTGAGGCACTTGAAGATTCTGTTGCCAGAGCATCTGAATC	69	966	NC_026149.1_-_XP_011078191.1 Sesamum indicum cultivar Zhongzhi No. 13 linkage group LG5, S_indicum_v1.0, whole genome shotgun sequence	26S proteasome regulatory subunit RPN13
	2073	NC_026154.1 - XP_011092516.1	97.917	48	1	0	1	48	115	162	2.56e-16	83.3	NC_026154.1_-_XP_011092516.1	91	47	47	0	97.92	1	1	TGCAGACAATGCTTCCGCAGCAATGCAAAGGAAATTGGCTTCATCAAG	TGCAGACAATGCTTCCGCAGCAATGCCAAGGAAATTGGCTTCATCAAG	69	171	NC_026154.1_-_XP_011092516.1 Sesamum indicum cultivar Zhongzhi No. 13 linkage group LG10, S_indicum_v1.0, whole genome shotgun sequence	40S ribosomal protein S29
	2073	NC_026149.1 - XP_011078121.1	91.667	48	4	0	1	48	115	162	1.61e-12	69.8	NC_026149.1_-_XP_011078121.1	76	44	44	0	91.67	1	1	TGCAGACAATGCTTCCGCAGCAATGCAAAGGAAATTGGCTTCATCAAG	TGCAGGCAGTGCTTCCGCAGCAACGCCAAGGAAATTGGCTTCATCAAG	69	171	NC_026149.1_-_XP_011078121.1 Sesamum indicum cultivar Zhongzhi No. 13 linkage group LG5, S_indicum_v1.0, whole genome shotgun sequence	40S ribosomal protein S29
	2077	NC_026145.1 - XP_011078242.1	84.058	69	11	0	1	69	3071	3003	3.79e-14	76.1	NC_026145.1_-_XP_011078242.1	83	58	58	0	84.06	1	-1	TGCAGACAATGTTTCAAGGTCTGCAAAGTAACGGGCTTCGACACAAACGAATCCATCCCATTTGCATAA	TGTAGACATTGTTTCAAGTTTTGAAATGTAACAGGCTTTGATACAAATGAGTCCATCCCATTTGCATAA	69	3099	NC_026145.1_-_XP_011078242.1 Sesamum indicum cultivar Zhongzhi No. 13 linkage group LG1, S_indicum_v1.0, whole genome shotgun sequence	histidine kinase 5-like
	2077	NC_026145.1 - XP_011078407.1	84.058	69	11	0	1	69	3071	3003	3.79e-14	76.1	NC_026145.1_-_XP_011078407.1	83	58	58	0	84.06	1	-1	TGCAGACAATGTTTCAAGGTCTGCAAAGTAACGGGCTTCGACACAAACGAATCCATCCCATTTGCATAA	TGTAGACATTGTTTCAAGTTTTGAAATGTAACAGGCTTTGATACAAATGAGTCCATCCCATTTGCATAA	69	3099	NC_026145.1_-_XP_011078407.1 Sesamum indicum cultivar Zhongzhi No. 13 linkage group LG1, S_indicum_v1.0, whole genome shotgun sequence	histidine kinase 5-like
	2078	NC_026145.1 - XP_011078242.1	84.058	69	11	0	1	69	3071	3003	3.79e-14	76.1	NC_026145.1_-_XP_011078242.1	83	58	58	0	84.06	1	-1	TGCAGACAATGTTTCAAGGTCTGCAAAGTAACGGGCTTCGACACAAACGAATCCATCCCATTTGCATAA	TGTAGACATTGTTTCAAGTTTTGAAATGTAACAGGCTTTGATACAAATGAGTCCATCCCATTTGCATAA	69	3099	NC_026145.1_-_XP_011078242.1 Sesamum indicum cultivar Zhongzhi No. 13 linkage group LG1, S_indicum_v1.0, whole genome shotgun sequence	histidine kinase 5-like
	2078	NC_026145.1 - XP_011078407.1	84.058	69	11	0	1	69	3071	3003	3.79e-14	76.1	NC_026145.1_-_XP_011078407.1	83	58	58	0	84.06	1	-1	TGCAGACAATGTTTCAAGGTCTGCAAAGTAACGGGCTTCGACACAAACGAATCCATCCCATTTGCATAA	TGTAGACATTGTTTCAAGTTTTGAAATGTAACAGGCTTTGATACAAATGAGTCCATCCCATTTGCATAA	69	3099	NC_026145.1_-_XP_011078407.1 Sesamum indicum cultivar Zhongzhi No. 13 linkage group LG1, S_indicum_v1.0, whole genome shotgun sequence	histidine kinase 5-like
	2084	NC_026158.1 - XP_011098098.1	91.525	59	5	0	11	69	1218	1276	7.32e-17	85.1	NC_026158.1_-_XP_011098098.1	93	54	54	0	91.53	1	1	AGATCAAACATGCAAGAAATTTACTCCATTTGGTGGAGGGTCGAGATGCTGCCCAGGTT	AGATCAAACGTGCAAGAAGTTCACTCCGTTTGGTGGAGGGTCGAGGTGCTGCCCAGGTT	69	1428	NC_026158.1_-_XP_011098098.1 Sesamum indicum cultivar Zhongzhi No. 13 linkage group LG14, S_indicum_v1.0, whole genome shotgun sequence	cytochrome P450 724B1
	2107	NC_026153.1 - XP_011090161.1	87.5	56	7	0	1	56	3030	3085	1.61e-12	70.7	NC_026153.1_-_XP_011090161.1	77	49	49	0	87.5	1	1	TGCAGACACCGTCATCATATTTGACTCGGATTGGAATCCACAAAATGACTTACAGG	TGCAGACACAGTTATCATATTTGATTCAGATTGGAATCCGCAAAATGATCTACAGG	69	5151	NC_026153.1_-_XP_011090161.1 Sesamum indicum cultivar Zhongzhi No. 13 linkage group LG9, S_indicum_v1.0, whole genome shotgun sequence	protein CHROMATIN REMODELING 5 isoform X3
	2107	NC_026153.1 - XP_011090160.1	87.5	56	7	0	1	56	3030	3085	1.61e-12	70.7	NC_026153.1_-_XP_011090160.1	77	49	49	0	87.5	1	1	TGCAGACACCGTCATCATATTTGACTCGGATTGGAATCCACAAAATGACTTACAGG	TGCAGACACAGTTATCATATTTGATTCAGATTGGAATCCGCAAAATGATCTACAGG	69	5151	NC_026153.1_-_XP_011090160.1 Sesamum indicum cultivar Zhongzhi No. 13 linkage group LG9, S_indicum_v1.0, whole genome shotgun sequence	protein CHROMATIN REMODELING 5 isoform X3
	2113	NC_026154.1 - XP_011092919.1	80.882	68	13	0	2	69	1382	1315	6.86e-11	65.3	NC_026154.1_-_XP_011092919.1	71	55	55	0	80.88	1	-1	GCAGACACGATGTTGCTAGCGTGGGCATTGAAGCCCCCCAGAGCTCCGGCGACAGCCGAGCCGGTGAG	GCAGAGACGATATTGCTAGCATGAGCATTGAAGCCACCCAGCGCTCCTGCCATCGCAGAGCCAGTAAG	69	1749	NC_026154.1_-_XP_011092919.1 Sesamum indicum cultivar Zhongzhi No. 13 linkage group LG10, S_indicum_v1.0, whole genome shotgun sequence	3-hydroxy-3-methylglutaryl-coenzyme A reductase
	2121	NC_026145.1 - XP_011087223.1	85.507	69	10	0	1	69	941	873	8.92e-16	80.6	NC_026145.1_-_XP_011087223.1	88	59	59	0	85.51	1	-1	TGCAGACACTGAGTGCGAGTACATAGGGAGACATTCTGAAGTTCATCCAAAATAATTTTCGCTCTTTCA	TGCAGACACTGAGCACGGGTATAAAGAGACATGTTCTGAAGTTCATCCAAAATAATTTTAGCTCTTTCA	69	3591	NC_026145.1_-_XP_011087223.1 Sesamum indicum cultivar Zhongzhi No. 13 linkage group LG1, S_indicum_v1.0, whole genome shotgun sequence	DNA-directed RNA polymerase I subunit 2
	2122	NC_026157.1 - XP_011096958.1	83.077	65	11	0	1	65	1151	1087	5.63e-12	68.9	NC_026157.1_-_XP_011096958.1	75	54	54	0	83.08	1	-1	TGCAGACACTGCTCCGCAGTTGGTCGCTTCTCTGGCTCAAAAGCAAGAATTGGACAAAGAAAGCC	TGTAGGCACTGTTGAGCAGTTGGTCGCTTCTCTGGGTCAAAATCAAGTAAGGGACAAAGAAAACC	69	1179	NC_026157.1_-_XP_011096958.1 Sesamum indicum cultivar Zhongzhi No. 13 linkage group LG13, S_indicum_v1.0, whole genome shotgun sequence	SRSF protein kinase 1 isoform X1
	2122	NC_026157.1 - XP_011096957.1	83.077	65	11	0	1	65	1229	1165	5.63e-12	68.9	NC_026157.1_-_XP_011096957.1	75	54	54	0	83.08	1	-1	TGCAGACACTGCTCCGCAGTTGGTCGCTTCTCTGGCTCAAAAGCAAGAATTGGACAAAGAAAGCC	TGTAGGCACTGTTGAGCAGTTGGTCGCTTCTCTGGGTCAAAATCAAGTAAGGGACAAAGAAAACC	69	1257	NC_026157.1_-_XP_011096957.1 Sesamum indicum cultivar Zhongzhi No. 13 linkage group LG13, S_indicum_v1.0, whole genome shotgun sequence	SRSF protein kinase 1 isoform X1
	2146	NC_026155.1 - XP_011093053.1	92.537	67	5	0	3	69	520	586	3.32e-21	99.6	NC_026155.1_-_XP_011093053.1	109	62	62	0	92.54	1	1	CAGACAGAGAAGTCTCCCTATCAGTACAGGGGAATGTTTCATGCTTTATCCACTGTGCTTCGTGAGG	CAGACAGAGAAGTCTCCTTACCAGTACAGAGGGATGTTTCATGCTTTATCAACTGTGCTTCGTGAGG	69	1065	NC_026155.1_-_XP_011093053.1 Sesamum indicum cultivar Zhongzhi No. 13 linkage group LG11, S_indicum_v1.0, whole genome shotgun sequence	mitochondrial adenine nucleotide transporter ADNT1
	2146	NC_026145.1 - XP_011093457.1	91.045	67	6	0	3	69	520	586	4.05e-20	95.1	NC_026145.1_-_XP_011093457.1	104	61	61	0	91.04	1	1	CAGACAGAGAAGTCTCCCTATCAGTACAGGGGAATGTTTCATGCTTTATCCACTGTGCTTCGTGAGG	CAGACAGAGAAGTCCCCTTATCAGTACCGAGGAATGTTTCATGCTCTATCAACTGTGCTTCGTGAGG	69	1065	NC_026145.1_-_XP_011093457.1 Sesamum indicum cultivar Zhongzhi No. 13 linkage group LG1, S_indicum_v1.0, whole genome shotgun sequence	mitochondrial adenine nucleotide transporter ADNT1
	2150	NC_026149.1 - XP_011078960.1	82.812	64	11	0	6	69	218	155	1.96e-11	67.1	NC_026149.1_-_XP_011078960.1	73	53	53	0	82.81	1	-1	ACAGCATCCTTGAGCTTCTCGAGCCAGTCTCGAACCTCGTGGTTCTTGAACTGCTGCTCCTCTG	ACAGCATCCTTGAGCTTTTCGAGCCAGTCTCTGACTTCATGATTCTTGGCTTGCTGCCCATCTG	69	2484	NC_026149.1_-_XP_011078960.1 Sesamum indicum cultivar Zhongzhi No. 13 linkage group LG5, S_indicum_v1.0, whole genome shotgun sequence	putative disease resistance protein RGA1
	2153	NC_026150.1 - XP_011079718.1	83.871	62	10	0	1	62	1524	1585	5.63e-12	68	NC_026150.1_-_XP_011079718.1	74	52	52	0	83.87	1	1	TGCAGACAGCTCAGAAGGCCTTCCTCCCATTATACGACGTTGCTTTAGTCATGAAATTACAG	TGCAGACAGTTCTGAAGGTCTTCCTCCAACTATTAGGCGCTGCTTTAGTCATGAAATTAAAG	69	2811	NC_026150.1_-_XP_011079718.1 Sesamum indicum cultivar Zhongzhi No. 13 linkage group LG6, S_indicum_v1.0, whole genome shotgun sequence	peroxisome biogenesis protein 6 isoform X2
	2153	NC_026150.1 - XP_011079720.1	83.871	62	10	0	1	62	1521	1582	5.63e-12	68	NC_026150.1_-_XP_011079720.1	74	52	52	0	83.87	1	1	TGCAGACAGCTCAGAAGGCCTTCCTCCCATTATACGACGTTGCTTTAGTCATGAAATTACAG	TGCAGACAGTTCTGAAGGTCTTCCTCCAACTATTAGGCGCTGCTTTAGTCATGAAATTAAAG	69	2808	NC_026150.1_-_XP_011079720.1 Sesamum indicum cultivar Zhongzhi No. 13 linkage group LG6, S_indicum_v1.0, whole genome shotgun sequence	peroxisome biogenesis protein 6 isoform X2
	2160	NC_026150.1 - XP_011080899.1	89.855	69	7	0	1	69	1333	1265	1.41e-19	94.2	NC_026150.1_-_XP_011080899.1	103	62	62	0	89.86	1	-1	TGCAGACAGGCAGTAAAATGAGAGCCATGTTCAATTTCAAAGTCTCGCCTGCACCCTTAGCCGTGAGAA	TGCACACAGGCAATAATATGAGAGCCATGTTGAATTTCAGAGTCTCGGCTGCGCCCTTAGCCGTGAGAA	69	2853	NC_026150.1_-_XP_011080899.1 Sesamum indicum cultivar Zhongzhi No. 13 linkage group LG6, S_indicum_v1.0, whole genome shotgun sequence	respiratory burst oxidase homolog protein A
	2168	NC_026145.1 - XP_011091170.1	85	60	9	0	10	69	647	706	5.63e-12	68.9	NC_026145.1_-_XP_011091170.1	75	51	51	0	85	1	1	TGAATCTGAATCTTCCAAAAGAAGGGTATTTCTTTACATACAAACAGAATGCGATGGATG	TGAAACTGAATCTTCCACAAGAAGGGTATTTTTTCATTTACAAACAAAATGTAATGGATG	69	789	NC_026145.1_-_XP_011091170.1 Sesamum indicum cultivar Zhongzhi No. 13 linkage group LG1, S_indicum_v1.0, whole genome shotgun sequence	ubiquitin-NEDD8-like protein RUB2
	2211	NC_026147.1 - XP_011071806.1	88.406	69	8	0	1	69	263	331	1.72e-18	89.7	NC_026147.1_-_XP_011071806.1	98	61	61	0	88.41	1	1	TGCAGACATGGTTTGGAACCAGATTACCAGCTGTCATGGGAGGTTCATACACCTTCGTCGCCCCCACAA	TGCAAACATGGTTTGGAACCAGATTACCAGTTGTGATAGGAGGTTCATACACTTTTGTCGCGCCAACAA	69	1593	NC_026147.1_-_XP_011071806.1 Sesamum indicum cultivar Zhongzhi No. 13 linkage group LG3, S_indicum_v1.0, whole genome shotgun sequence	nucleobase-ascorbate transporter 6
	2211	NC_026147.1 - XP_011071807.1	88.406	69	8	0	1	69	263	331	1.72e-18	89.7	NC_026147.1_-_XP_011071807.1	98	61	61	0	88.41	1	1	TGCAGACATGGTTTGGAACCAGATTACCAGCTGTCATGGGAGGTTCATACACCTTCGTCGCCCCCACAA	TGCAAACATGGTTTGGAACCAGATTACCAGTTGTGATAGGAGGTTCATACACTTTTGTCGCGCCAACAA	69	1593	NC_026147.1_-_XP_011071807.1 Sesamum indicum cultivar Zhongzhi No. 13 linkage group LG3, S_indicum_v1.0, whole genome shotgun sequence	nucleobase-ascorbate transporter 6
	2212	NC_026147.1 - XP_011071806.1	88.406	69	8	0	1	69	263	331	1.72e-18	89.7	NC_026147.1_-_XP_011071806.1	98	61	61	0	88.41	1	1	TGCAGACATGGTTTGGAACCAGATTACCAGCTGTCATGGGAGGTTCATACACCTTCGTCGCCCCCACAA	TGCAAACATGGTTTGGAACCAGATTACCAGTTGTGATAGGAGGTTCATACACTTTTGTCGCGCCAACAA	69	1593	NC_026147.1_-_XP_011071806.1 Sesamum indicum cultivar Zhongzhi No. 13 linkage group LG3, S_indicum_v1.0, whole genome shotgun sequence	nucleobase-ascorbate transporter 6
	2212	NC_026147.1 - XP_011071807.1	88.406	69	8	0	1	69	263	331	1.72e-18	89.7	NC_026147.1_-_XP_011071807.1	98	61	61	0	88.41	1	1	TGCAGACATGGTTTGGAACCAGATTACCAGCTGTCATGGGAGGTTCATACACCTTCGTCGCCCCCACAA	TGCAAACATGGTTTGGAACCAGATTACCAGTTGTGATAGGAGGTTCATACACTTTTGTCGCGCCAACAA	69	1593	NC_026147.1_-_XP_011071807.1 Sesamum indicum cultivar Zhongzhi No. 13 linkage group LG3, S_indicum_v1.0, whole genome shotgun sequence	nucleobase-ascorbate transporter 6
	2216	NC_026145.1 - XP_020550593.1	90	50	5	0	1	50	2048	2097	5.63e-12	68.9	NC_026145.1_-_XP_020550593.1	75	45	45	0	90	1	1	TGCAGACATTACCAAAAATTGTTTTGAACAAAGCTGGTGGCTTGGGATTA	TGCAGACTTTACCAAAAATTGTTTTGGGCAAAGTTGGTGACTTGGGATTA	69	8271	NC_026145.1_-_XP_020550593.1 Sesamum indicum cultivar Zhongzhi No. 13 linkage group LG1, S_indicum_v1.0, whole genome shotgun sequence	putative disease resistance protein At3g14460
	2217	NC_026150.1 - XP_011081258.1	90.476	63	6	0	7	69	1993	2055	6.01e-18	87.8	NC_026150.1_-_XP_011081258.1	96	57	57	0	90.48	1	1	CATTCTCTTCCAGGTCCTCTTACCGGTGGAAGTGTTGCCACTAAGGAGTTGAACAAATGGATT	CAATCCCTTCCTGGTCCTCTTACCAGTGGAAGTGTTGGCAGTAAGGAGTTGAACAAATGGATT	69	4404	NC_026150.1_-_XP_011081258.1 Sesamum indicum cultivar Zhongzhi No. 13 linkage group LG6, S_indicum_v1.0, whole genome shotgun sequence	protein transport protein SEC16B homolog
	2217	NC_026150.1 - XP_020550570.1	90.476	63	6	0	7	69	1993	2055	6.01e-18	87.8	NC_026150.1_-_XP_020550570.1	96	57	57	0	90.48	1	1	CATTCTCTTCCAGGTCCTCTTACCGGTGGAAGTGTTGCCACTAAGGAGTTGAACAAATGGATT	CAATCCCTTCCTGGTCCTCTTACCAGTGGAAGTGTTGGCAGTAAGGAGTTGAACAAATGGATT	69	4404	NC_026150.1_-_XP_020550570.1 Sesamum indicum cultivar Zhongzhi No. 13 linkage group LG6, S_indicum_v1.0, whole genome shotgun sequence	protein transport protein SEC16B homolog
	2219	NC_026155.1 - XP_011094672.1	85.075	67	10	0	3	69	1066	1000	1.09e-14	77	NC_026155.1_-_XP_011094672.1	84	57	57	0	85.07	1	-1	CAGACATTGCAGGCCGGAGTCTCGCCACTTCTTGCACGCACAGCAGCCCGATTTTCAAGAATCGAAC	CAGACATTGCAGGCCGGAGTCTGGTGGTTTCTTGCACACAAAGCAGCCCAACTTTCAAGAACCGAAC	69	1230	NC_026155.1_-_XP_011094672.1 Sesamum indicum cultivar Zhongzhi No. 13 linkage group LG11, S_indicum_v1.0, whole genome shotgun sequence	putative serine/threonine-protein kinase
	2229	NC_026152.1 - XP_011086203.1	92.063	63	5	0	6	68	1018	1080	4.93e-19	92.4	NC_026152.1_-_XP_011086203.1	101	58	58	0	92.06	1	1	ACATTTGCAACACTTAGTCCTATACCAGGTTACATGCAATGGCTTTTGTCCAAACTGGGATCA	ACATTTGCAACACTTAGTCCTCTACCAGGTTACATGCAATGGCTTTTGTCAAAGTTGGCATCA	69	1566	NC_026152.1_-_XP_011086203.1 Sesamum indicum cultivar Zhongzhi No. 13 linkage group LG8, S_indicum_v1.0, whole genome shotgun sequence	malonyl-CoA decarboxylase, mitochondrial isoform X2
	2229	NC_026152.1 - XP_011086204.1	92.063	63	5	0	6	68	928	990	4.93e-19	92.4	NC_026152.1_-_XP_011086204.1	101	58	58	0	92.06	1	1	ACATTTGCAACACTTAGTCCTATACCAGGTTACATGCAATGGCTTTTGTCCAAACTGGGATCA	ACATTTGCAACACTTAGTCCTCTACCAGGTTACATGCAATGGCTTTTGTCAAAGTTGGCATCA	69	1476	NC_026152.1_-_XP_011086204.1 Sesamum indicum cultivar Zhongzhi No. 13 linkage group LG8, S_indicum_v1.0, whole genome shotgun sequence	malonyl-CoA decarboxylase, mitochondrial isoform X2
	2255	NC_026150.1 - XP_020549897.1	91.304	69	6	0	1	69	142	74	3.32e-21	98.7	NC_026150.1_-_XP_020549897.1	108	63	63	0	91.3	1	-1	TGCAGACCAGGAAAATGAACAGTGATATGACAGTGTATATAACCTTCTCTCTGAATGGAACCTTCCTGT	TGCAGACCAGGAAAATAAACAGGGATATTACAGTGTATATAACCTTCTCTCTGAAAGGAACTTTTCTGT	69	1359	NC_026150.1_-_XP_020549897.1 Sesamum indicum cultivar Zhongzhi No. 13 linkage group LG6, S_indicum_v1.0, whole genome shotgun sequence	protein transport protein Sec61 subunit alpha-like
	2255	NC_026158.1 - XP_011098206.1	86.957	69	9	0	1	69	142	74	7.32e-17	85.1	NC_026158.1_-_XP_011098206.1	93	60	60	0	86.96	1	-1	TGCAGACCAGGAAAATGAACAGTGATATGACAGTGTATATAACCTTCTCTCTGAATGGAACCTTCCTGT	TGCAGACCAGGAAAATAAAAAGAGAGATTACAGTATAGATAACCTTCTCTCTGAATGGAACTCTCCTGT	69	1428	NC_026158.1_-_XP_011098206.1 Sesamum indicum cultivar Zhongzhi No. 13 linkage group LG14, S_indicum_v1.0, whole genome shotgun sequence	protein transport protein Sec61 subunit alpha-like
	2268	NC_026151.1 - XP_020551181.1	92.537	67	5	0	1	67	538	472	3.32e-21	99.6	NC_026151.1_-_XP_020551181.1	109	62	62	0	92.54	1	-1	TGCAGACCATGTAGAGGATGTCTGTAAACAATTGTGCATCTTTTCCACCATCAAGACCAGGATCACC	TGCATACCATGTTGAGGATGTCTGTAAATAATTGTGCATTTTTACCACCATCAAGACCAGGATCACC	69	5301	NC_026151.1_-_XP_020551181.1 Sesamum indicum cultivar Zhongzhi No. 13 linkage group LG7, S_indicum_v1.0, whole genome shotgun sequence	brefeldin A-inhibited guanine nucleotide-exchange protein 5 isoform X2
	2268	NC_026151.1 - XP_011084711.1	92.537	67	5	0	1	67	538	472	3.32e-21	99.6	NC_026151.1_-_XP_011084711.1	109	62	62	0	92.54	1	-1	TGCAGACCATGTAGAGGATGTCTGTAAACAATTGTGCATCTTTTCCACCATCAAGACCAGGATCACC	TGCATACCATGTTGAGGATGTCTGTAAATAATTGTGCATTTTTACCACCATCAAGACCAGGATCACC	69	5301	NC_026151.1_-_XP_011084711.1 Sesamum indicum cultivar Zhongzhi No. 13 linkage group LG7, S_indicum_v1.0, whole genome shotgun sequence	brefeldin A-inhibited guanine nucleotide-exchange protein 5 isoform X2
	2274	NC_026154.1 - XP_011092138.1	86.667	60	8	0	10	69	1202	1143	1.32e-13	73.4	NC_026154.1_-_XP_011092138.1	80	52	52	0	86.67	1	-1	ACCAATTTCCCATCTGCATCAAGAACTCTCATGCGCTCATCAACAGGGATAAATCCACGT	ACCAACTTCCCATTTGCATCAATCACTCTCATGCGCTCATCAACTGGGACAAACCCGCGT	69	1803	NC_026154.1_-_XP_011092138.1 Sesamum indicum cultivar Zhongzhi No. 13 linkage group LG10, S_indicum_v1.0, whole genome shotgun sequence	dihydrolipoyl dehydrogenase 2, chloroplastic isoform X2
	2274	NC_026154.1 - XP_011092139.1	86.667	60	8	0	10	69	1202	1143	1.32e-13	73.4	NC_026154.1_-_XP_011092139.1	80	52	52	0	86.67	1	-1	ACCAATTTCCCATCTGCATCAAGAACTCTCATGCGCTCATCAACAGGGATAAATCCACGT	ACCAACTTCCCATTTGCATCAATCACTCTCATGCGCTCATCAACTGGGACAAACCCGCGT	69	1728	NC_026154.1_-_XP_011092139.1 Sesamum indicum cultivar Zhongzhi No. 13 linkage group LG10, S_indicum_v1.0, whole genome shotgun sequence	dihydrolipoyl dehydrogenase 2, chloroplastic isoform X2
	2276	NC_026148.1 - XP_011077000.1	84.746	59	9	0	4	62	688	746	1.96e-11	67.1	NC_026148.1_-_XP_011077000.1	73	50	50	0	84.75	1	1	AGACCCATGATTGATCCTGTTGCCACAACTTTTGATCGGCTTCTTTGTGGAAGAAGATC	AGACGAATAATTGATCCTGTTGCTACAATTTTTGAGCGGATGTTTTGTGGAAGAAGATC	69	933	NC_026148.1_-_XP_011077000.1 Sesamum indicum cultivar Zhongzhi No. 13 linkage group LG4, S_indicum_v1.0, whole genome shotgun sequence	rhomboid-like protein 19
	2276	NC_026151.1 - XP_011084351.1	81.818	66	12	0	4	69	688	753	1.96e-11	66.2	NC_026151.1_-_XP_011084351.1	72	54	54	0	81.82	1	1	AGACCCATGATTGATCCTGTTGCCACAACTTTTGATCGGCTTCTTTGTGGAAGAAGATCTCAATCC	AGACCAGTAATAGATCCTCTTGCCACAATTTTTGAGAGGTTACTTTGTGGAAGAAGATCAGAATCC	69	942	NC_026151.1_-_XP_011084351.1 Sesamum indicum cultivar Zhongzhi No. 13 linkage group LG7, S_indicum_v1.0, whole genome shotgun sequence	rhomboid-like protein 19
	2281	NC_026154.1 - XP_011091783.1	83.871	62	10	0	1	62	1250	1189	5.63e-12	68	NC_026154.1_-_XP_011091783.1	74	52	52	0	83.87	1	-1	TGCAGACCCCACACCGGCCTCACCCACGGGTCGTCCTTCCCATACATGAGACAGATGGGTGT	TGCAAACCCCAGACAGGCCGCACCCATGGATCTTCCTTCCCGTACATGAGACAAATAGGTGT	69	1563	NC_026154.1_-_XP_011091783.1 Sesamum indicum cultivar Zhongzhi No. 13 linkage group LG10, S_indicum_v1.0, whole genome shotgun sequence	pheophytinase, chloroplastic
	2281	NC_026154.1 - XP_011091784.1	83.871	62	10	0	1	62	1250	1189	5.63e-12	68	NC_026154.1_-_XP_011091784.1	74	52	52	0	83.87	1	-1	TGCAGACCCCACACCGGCCTCACCCACGGGTCGTCCTTCCCATACATGAGACAGATGGGTGT	TGCAAACCCCAGACAGGCCGCACCCATGGATCTTCCTTCCCGTACATGAGACAAATAGGTGT	69	1563	NC_026154.1_-_XP_011091784.1 Sesamum indicum cultivar Zhongzhi No. 13 linkage group LG10, S_indicum_v1.0, whole genome shotgun sequence	pheophytinase, chloroplastic
	2284	NC_026154.1 - XP_011091475.1	85.507	69	10	0	1	69	248	180	8.92e-16	80.6	NC_026154.1_-_XP_011091475.1	88	59	59	0	85.51	1	-1	TGCAGACCCCTGCCCTCTTCAACCTCAACCTTCACTTCCTATTTCTTCAGTCCGGGAATGTCCACTTTG	TGCAGAACTCTGCCGTCCTCAACCTCCACCTTCACTTCCTCTTTCTTCAGCCCAGGAACGTCCACCTTG	69	468	NC_026154.1_-_XP_011091475.1 Sesamum indicum cultivar Zhongzhi No. 13 linkage group LG10, S_indicum_v1.0, whole genome shotgun sequence	18.2 kDa class I heat shock protein-like
	2300	NC_026157.1 - XP_011097532.1	85.507	69	10	0	1	69	275	207	8.92e-16	80.6	NC_026157.1_-_XP_011097532.1	88	59	59	0	85.51	1	-1	TGCAGACCGAGCTCCTGCGCGAGCTTGACTTTCCTCTCCGGTTCAAGCTTGTTCTCAACCTCGAAATTC	TGCAGGCCAAGTTCTTGAGCTAGCTTAACTTTCCTCTCAGGTTCAAGCTTATTCTCAACCTCAAAATTC	69	918	NC_026157.1_-_XP_011097532.1 Sesamum indicum cultivar Zhongzhi No. 13 linkage group LG13, S_indicum_v1.0, whole genome shotgun sequence	homeobox-leucine zipper protein ATHB-6
	2300	NC_026159.1 - XP_011100030.1	85.507	69	10	0	1	69	299	231	8.92e-16	80.6	NC_026159.1_-_XP_011100030.1	88	59	59	0	85.51	1	-1	TGCAGACCGAGCTCCTGCGCGAGCTTGACTTTCCTCTCCGGTTCAAGCTTGTTCTCAACCTCGAAATTC	TGCAGCCCGAGTTCTTGTGCAAGCTTCACTTTCCTCTCCGGCTCAAGCTTATTCTCAACCTCAAAGTTC	69	987	NC_026159.1_-_XP_011100030.1 Sesamum indicum cultivar Zhongzhi No. 13 linkage group LG15, S_indicum_v1.0, whole genome shotgun sequence	homeobox-leucine zipper protein ATHB-6-like
	2301	NC_026148.1 - XP_011075450.1	82.09	67	12	0	1	67	569	635	5.63e-12	68	NC_026148.1_-_XP_011075450.1	74	55	55	0	82.09	1	1	TGCAGACCGAGGCCGAAGTCGGAGAAGATGGAAAGCTACACGTTACTGTGAGAAAATCAACGAGCTC	TGCAAACTGAGGCTGAGGTTGGTGAAGATGGGAAGCTTCATGTGACTGTAAGAAAATCAACCAGCTC	69	1788	NC_026148.1_-_XP_011075450.1 Sesamum indicum cultivar Zhongzhi No. 13 linkage group LG4, S_indicum_v1.0, whole genome shotgun sequence	probable auxin efflux carrier component 1b isoform X2
	2301	NC_026148.1 - XP_011075451.1	82.09	67	12	0	1	67	569	635	5.63e-12	68	NC_026148.1_-_XP_011075451.1	74	55	55	0	82.09	1	1	TGCAGACCGAGGCCGAAGTCGGAGAAGATGGAAAGCTACACGTTACTGTGAGAAAATCAACGAGCTC	TGCAAACTGAGGCTGAGGTTGGTGAAGATGGGAAGCTTCATGTGACTGTAAGAAAATCAACCAGCTC	69	1695	NC_026148.1_-_XP_011075451.1 Sesamum indicum cultivar Zhongzhi No. 13 linkage group LG4, S_indicum_v1.0, whole genome shotgun sequence	probable auxin efflux carrier component 1b isoform X2
	2302	NC_026154.1 - XP_011091560.1	89.062	64	7	0	4	67	224	287	7.32e-17	85.1	NC_026154.1_-_XP_011091560.1	93	57	57	0	89.06	1	1	AGACCGATACAGCTTCTGTCCTTCTAGAGGCAATGGAGTACATAAGGTTCCTTCATGAACAGGT	AGACAGATACAGCTTCAGTCCTCCTGGAGGCAATGGAGTACATAAATTTCCTTCACGAACAGGT	69	507	NC_026154.1_-_XP_011091560.1 Sesamum indicum cultivar Zhongzhi No. 13 linkage group LG10, S_indicum_v1.0, whole genome shotgun sequence	transcription factor bHLH113 isoform X2
	2302	NC_026154.1 - XP_011091561.1	89.062	64	7	0	4	67	164	227	7.32e-17	85.1	NC_026154.1_-_XP_011091561.1	93	57	57	0	89.06	1	1	AGACCGATACAGCTTCTGTCCTTCTAGAGGCAATGGAGTACATAAGGTTCCTTCATGAACAGGT	AGACAGATACAGCTTCAGTCCTCCTGGAGGCAATGGAGTACATAAATTTCCTTCACGAACAGGT	69	447	NC_026154.1_-_XP_011091561.1 Sesamum indicum cultivar Zhongzhi No. 13 linkage group LG10, S_indicum_v1.0, whole genome shotgun sequence	transcription factor bHLH113 isoform X2
	2304	NC_026151.1 - XP_020551041.1	88.406	69	8	0	1	69	840	772	1.72e-18	89.7	NC_026151.1_-_XP_020551041.1	98	61	61	0	88.41	1	-1	TGCAGACCGCACACTCATGTTTTTCTCCTCATTGCGAATTTCCACCTCTTTCCTAGCAACATGGAGTTC	TGCAGAACGCACGCTCATGTTCTTTTCTTCATTACGAATTTCCACCTCTTTCCTAGCAATATGCAGTTC	69	3297	NC_026151.1_-_XP_020551041.1 Sesamum indicum cultivar Zhongzhi No. 13 linkage group LG7, S_indicum_v1.0, whole genome shotgun sequence	filament-like plant protein 4
	2304	NC_026151.1 - XP_011083511.1	88.406	69	8	0	1	69	840	772	1.72e-18	89.7	NC_026151.1_-_XP_011083511.1	98	61	61	0	88.41	1	-1	TGCAGACCGCACACTCATGTTTTTCTCCTCATTGCGAATTTCCACCTCTTTCCTAGCAACATGGAGTTC	TGCAGAACGCACGCTCATGTTCTTTTCTTCATTACGAATTTCCACCTCTTTCCTAGCAATATGCAGTTC	69	3297	NC_026151.1_-_XP_011083511.1 Sesamum indicum cultivar Zhongzhi No. 13 linkage group LG7, S_indicum_v1.0, whole genome shotgun sequence	filament-like plant protein 4
	2306	NC_026158.1 - XP_020554535.1	86.957	69	9	0	1	69	140	72	7.32e-17	85.1	NC_026158.1_-_XP_020554535.1	93	60	60	0	86.96	1	-1	TGCAGACCGGCATGTTTCGGAATGAGTCGCCAATTTCTGGTGCCATGCTGAGCAATGTAGGAGGAGAGC	TGAAGACCAGCATGCTTTGGAATGAGGCGCCAATTTCTTGTTCCATGTTGAGCAATGTAGGACGAGAGC	69	936	NC_026158.1_-_XP_020554535.1 Sesamum indicum cultivar Zhongzhi No. 13 linkage group LG14, S_indicum_v1.0, whole genome shotgun sequence	transcription factor MYB80
	2314	NC_026146.1 - XP_011071048.1	87.692	65	8	0	5	69	253	317	2.56e-16	82.4	NC_026146.1_-_XP_011071048.1	90	57	57	0	87.69	1	1	GACCGTGGGTACTATTCAGTGGAGACAGTCACACTCTTAGTGGCCTTGAAAGTTCGTTATAGAGA	GACCGTGGTTACTACTCGGTGGAAACAGTCACACTCTTGGTGGCTCTGAAAGTTCGTTATCGAGA	69	921	NC_026146.1_-_XP_011071048.1 Sesamum indicum cultivar Zhongzhi No. 13 linkage group LG2, S_indicum_v1.0, whole genome shotgun sequence	serine/threonine-protein phosphatase PP2A catalytic subunit-like
	2314	NC_026152.1 - XP_011086438.1	86.154	65	9	0	5	69	253	317	1.09e-14	77.9	NC_026152.1_-_XP_011086438.1	85	56	56	0	86.15	1	1	GACCGTGGGTACTATTCAGTGGAGACAGTCACACTCTTAGTGGCCTTGAAAGTTCGTTATAGAGA	GATCGTGGGTACTACTCGGTGGAAACGGTCACCCTTTTAGTGGCTCTGAAAGTTCGTTATAGAGA	69	921	NC_026152.1_-_XP_011086438.1 Sesamum indicum cultivar Zhongzhi No. 13 linkage group LG8, S_indicum_v1.0, whole genome shotgun sequence	serine/threonine-protein phosphatase PP2A catalytic subunit
	2315	NC_026146.1 - XP_011071048.1	87.692	65	8	0	5	69	253	317	2.56e-16	82.4	NC_026146.1_-_XP_011071048.1	90	57	57	0	87.69	1	1	GACCGTGGGTACTATTCGTTGGAGACAGTCACACTCTTAGTGGCCTTGAAAGTTCGTTATAGAGA	GACCGTGGTTACTACTCGGTGGAAACAGTCACACTCTTGGTGGCTCTGAAAGTTCGTTATCGAGA	69	921	NC_026146.1_-_XP_011071048.1 Sesamum indicum cultivar Zhongzhi No. 13 linkage group LG2, S_indicum_v1.0, whole genome shotgun sequence	serine/threonine-protein phosphatase PP2A catalytic subunit-like
	2315	NC_026152.1 - XP_011086438.1	86.154	65	9	0	5	69	253	317	1.09e-14	77.9	NC_026152.1_-_XP_011086438.1	85	56	56	0	86.15	1	1	GACCGTGGGTACTATTCGTTGGAGACAGTCACACTCTTAGTGGCCTTGAAAGTTCGTTATAGAGA	GATCGTGGGTACTACTCGGTGGAAACGGTCACCCTTTTAGTGGCTCTGAAAGTTCGTTATAGAGA	69	921	NC_026152.1_-_XP_011086438.1 Sesamum indicum cultivar Zhongzhi No. 13 linkage group LG8, S_indicum_v1.0, whole genome shotgun sequence	serine/threonine-protein phosphatase PP2A catalytic subunit
	2334	NC_026150.1 - XP_011080382.1	84.058	69	11	0	1	69	1301	1369	3.79e-14	76.1	NC_026150.1_-_XP_011080382.1	83	58	58	0	84.06	1	1	TGCAGACCTTCAACTGTGACGGCTATAAGATTAGAGAAGACAACGGTTGCGTCGTCATTTGCTGGCAAG	TGCAAAGCTTCAACTGTGATGGTTATAAGATCAAAGAAGAGAATGGGTGCGTTGTGATTTGCTGGCAAG	69	1413	NC_026150.1_-_XP_011080382.1 Sesamum indicum cultivar Zhongzhi No. 13 linkage group LG6, S_indicum_v1.0, whole genome shotgun sequence	scarecrow-like protein 3
	2334	NC_026153.1 - XP_011090154.1	81.159	69	13	0	1	69	1304	1372	1.96e-11	67.1	NC_026153.1_-_XP_011090154.1	73	56	56	0	81.16	1	1	TGCAGACCTTCAACTGTGACGGCTATAAGATTAGAGAAGACAACGGTTGCGTCGTCATTTGCTGGCAAG	TGCAGAGCTATAACTGTGACGGCTATAGGATCAAAGAGGAGAATGGGTGTGTGGTGATTTGCTGGCAAG	69	1416	NC_026153.1_-_XP_011090154.1 Sesamum indicum cultivar Zhongzhi No. 13 linkage group LG9, S_indicum_v1.0, whole genome shotgun sequence	scarecrow-like protein 3
	2338	NC_026154.1 - XP_011091489.1	89.394	66	7	0	4	69	2159	2094	6.01e-18	88.7	NC_026154.1_-_XP_011091489.1	97	59	59	0	89.39	1	-1	AGACCTTGGAGCTTCACTTCATACTCAATAAGAACTTGTCCATCTAAACATGTGGCAGAAGCTGGC	AGACCTTGGAGCTTCACTTCGCATTCAACTAGAACTTGACCATCTAAACATGTAGCAGAAGCTGGC	69	2850	NC_026154.1_-_XP_011091489.1 Sesamum indicum cultivar Zhongzhi No. 13 linkage group LG10, S_indicum_v1.0, whole genome shotgun sequence	uveal autoantigen with coiled-coil domains and ankyrin repeats
	2338	NC_026154.1 - XP_011091487.1	89.394	66	7	0	4	69	2159	2094	6.01e-18	88.7	NC_026154.1_-_XP_011091487.1	97	59	59	0	89.39	1	-1	AGACCTTGGAGCTTCACTTCATACTCAATAAGAACTTGTCCATCTAAACATGTGGCAGAAGCTGGC	AGACCTTGGAGCTTCACTTCGCATTCAACTAGAACTTGACCATCTAAACATGTAGCAGAAGCTGGC	69	2850	NC_026154.1_-_XP_011091487.1 Sesamum indicum cultivar Zhongzhi No. 13 linkage group LG10, S_indicum_v1.0, whole genome shotgun sequence	uveal autoantigen with coiled-coil domains and ankyrin repeats
	2351	NC_026153.1 - XP_011089454.1	86.792	53	7	0	1	53	756	704	6.86e-11	65.3	NC_026153.1_-_XP_011089454.1	71	46	46	0	86.79	1	-1	TGCAGACGAAGGGTTCAGCAGAGCTGCACATGCTCCATGGCGATGCCTTACAG	TGCAGATGAAGGATTCAGCAAAGCTGCACATGCTCCATGGTGATACTTTAAAG	69	1347	NC_026153.1_-_XP_011089454.1 Sesamum indicum cultivar Zhongzhi No. 13 linkage group LG9, S_indicum_v1.0, whole genome shotgun sequence	putative E3 ubiquitin-protein ligase XBAT31
	2358	NC_026148.1 - XP_011076208.1	87.879	66	8	0	4	69	1674	1609	7.32e-17	84.2	NC_026148.1_-_XP_011076208.1	92	58	58	0	87.88	1	-1	AGACGACATGATGGAAGCAAAAAGTTCGCATTGCCTTTGTAGATTGGAAAGCCACTTCTGTGCACC	AGAGGACCTGATGGTAGCAAAAAGTTCGCATTGGCGTTGTAGGTTGGCAACCCACTTCTGTGCACC	69	2436	NC_026148.1_-_XP_011076208.1 Sesamum indicum cultivar Zhongzhi No. 13 linkage group LG4, S_indicum_v1.0, whole genome shotgun sequence	homeobox-leucine zipper protein ANTHOCYANINLESS 2
	2363	NC_026155.1 - XP_011094245.1	85.294	68	10	0	2	69	791	724	3.11e-15	78.8	NC_026155.1_-_XP_011094245.1	86	58	58	0	85.29	1	-1	GCAGACGAGAAGGTGATGAATCCATAGCCTCGAGACCTACCAGAGTCCCTATCGTAGACGACCTTGGC	GCAGATGTGAAAGTAATGAATCCAAAGCCTCGAGATCTTCCAGAGTCCCTATCATAAATGACCTTGGC	69	963	NC_026155.1_-_XP_011094245.1 Sesamum indicum cultivar Zhongzhi No. 13 linkage group LG11, S_indicum_v1.0, whole genome shotgun sequence	33 kDa ribonucleoprotein, chloroplastic
	2364	NC_026155.1 - XP_011094245.1	85.294	68	10	0	2	69	791	724	3.11e-15	78.8	NC_026155.1_-_XP_011094245.1	86	58	58	0	85.29	1	-1	GCAGACGAGAAGGTGATGAATCCATAGCCTCGAGACCTACCAGAGTCCCTATCGTAGACGACCTTGGC	GCAGATGTGAAAGTAATGAATCCAAAGCCTCGAGATCTTCCAGAGTCCCTATCATAAATGACCTTGGC	69	963	NC_026155.1_-_XP_011094245.1 Sesamum indicum cultivar Zhongzhi No. 13 linkage group LG11, S_indicum_v1.0, whole genome shotgun sequence	33 kDa ribonucleoprotein, chloroplastic
	2382	NC_026152.1 - XP_011088220.1	88.462	52	6	0	10	61	309	258	5.63e-12	68	NC_026152.1_-_XP_011088220.1	74	46	46	0	88.46	1	-1	AGTTGGTGAAGCACTAGCAGAACTTTCTTCTGATTGAGGAGATTTTGGAGAC	AGTTGGTGAAGATCCACCAGAACTTTCCTCTGATTGAGGAGATTTGGGAGAC	69	1842	NC_026152.1_-_XP_011088220.1 Sesamum indicum cultivar Zhongzhi No. 13 linkage group LG8, S_indicum_v1.0, whole genome shotgun sequence	phosphatidylinositol 3,4,5-trisphosphate 3-phosphatase and protein-tyrosine-phosphatase PTEN2A isoform X2
	2382	NC_026152.1 - XP_011088219.1	88.462	52	6	0	10	61	309	258	5.63e-12	68	NC_026152.1_-_XP_011088219.1	74	46	46	0	88.46	1	-1	AGTTGGTGAAGCACTAGCAGAACTTTCTTCTGATTGAGGAGATTTTGGAGAC	AGTTGGTGAAGATCCACCAGAACTTTCCTCTGATTGAGGAGATTTGGGAGAC	69	1842	NC_026152.1_-_XP_011088219.1 Sesamum indicum cultivar Zhongzhi No. 13 linkage group LG8, S_indicum_v1.0, whole genome shotgun sequence	phosphatidylinositol 3,4,5-trisphosphate 3-phosphatase and protein-tyrosine-phosphatase PTEN2A isoform X2
	2405	NC_026150.1 - XP_011080550.1	90.625	64	6	0	1	64	545	608	1.72e-18	89.7	NC_026150.1_-_XP_011080550.1	98	58	58	0	90.62	1	1	TGCAGACGGCGGATGGGTGGGCGAAGTTCACCGGTGGGTTCTTCTTTGGTGGGATTTCTGGTGT	TGCAAACCGCTGATGGATGGGCTAAGTTCACCGGCGGGTTCTTCTTTGGTGGGATTTCTGGTGT	69	663	NC_026150.1_-_XP_011080550.1 Sesamum indicum cultivar Zhongzhi No. 13 linkage group LG6, S_indicum_v1.0, whole genome shotgun sequence	photosystem I reaction center subunit XI, chloroplastic
	2409	NC_026145.1 - XP_011086008.1	83.582	67	11	0	3	69	1222	1288	4.62e-13	72.5	NC_026145.1_-_XP_011086008.1	79	56	56	0	83.58	1	1	CAGACGGGTCAACCTGATGATATTTCTGAACATCCACTCGACAATGTTGACCTCCTTCAGGACCAGC	CAGGCTGGCCTACCAGATGATATTTCAGAGCATCCACTTGACAATGTCGACCTTCTTCAAGACCAGC	69	3159	NC_026145.1_-_XP_011086008.1 Sesamum indicum cultivar Zhongzhi No. 13 linkage group LG1, S_indicum_v1.0, whole genome shotgun sequence	exportin-7 isoform X2
	2409	NC_026145.1 - XP_011086043.1	83.582	67	11	0	3	69	1222	1288	4.62e-13	72.5	NC_026145.1_-_XP_011086043.1	79	56	56	0	83.58	1	1	CAGACGGGTCAACCTGATGATATTTCTGAACATCCACTCGACAATGTTGACCTCCTTCAGGACCAGC	CAGGCTGGCCTACCAGATGATATTTCAGAGCATCCACTTGACAATGTCGACCTTCTTCAAGACCAGC	69	3159	NC_026145.1_-_XP_011086043.1 Sesamum indicum cultivar Zhongzhi No. 13 linkage group LG1, S_indicum_v1.0, whole genome shotgun sequence	exportin-7 isoform X2
	2411	NC_026159.1 - XP_011099551.1	84.483	58	9	0	10	67	5	62	6.86e-11	65.3	NC_026159.1_-_XP_011099551.1	71	49	49	0	84.48	1	1	TCAAGATGTATACTGCCGCCCAAAAAATTCACAAAGACAGGGATGCTGAGCCCTCTGA	TCAAGATGTATACCGCCTTACAAAAGATACACAAGGACAAGGATGCTGAGCCCACTGA	69	585	NC_026159.1_-_XP_011099551.1 Sesamum indicum cultivar Zhongzhi No. 13 linkage group LG15, S_indicum_v1.0, whole genome shotgun sequence	40S ribosomal protein S7
	2415	NC_026153.1 - XP_020552386.1	88.406	69	8	0	1	69	1555	1487	1.72e-18	89.7	NC_026153.1_-_XP_020552386.1	98	61	61	0	88.41	1	-1	TGCAGACGTACACATTTGGCTGGAATCCAGTTTTTATAGCTTGGGTATGGACTTGCTCTCCTAGATCAA	TGCAGACATACACATTTGGATGGAACCCAGTTTTTATCACTTGAGTATGAACTTGCTCACCTAGATCAA	69	3165	NC_026153.1_-_XP_020552386.1 Sesamum indicum cultivar Zhongzhi No. 13 linkage group LG9, S_indicum_v1.0, whole genome shotgun sequence	pentatricopeptide repeat-containing protein At4g13650 isoform X2
	2415	NC_026153.1 - XP_020552385.1	88.406	69	8	0	1	69	1555	1487	1.72e-18	89.7	NC_026153.1_-_XP_020552385.1	98	61	61	0	88.41	1	-1	TGCAGACGTACACATTTGGCTGGAATCCAGTTTTTATAGCTTGGGTATGGACTTGCTCTCCTAGATCAA	TGCAGACATACACATTTGGATGGAACCCAGTTTTTATCACTTGAGTATGAACTTGCTCACCTAGATCAA	69	3165	NC_026153.1_-_XP_020552385.1 Sesamum indicum cultivar Zhongzhi No. 13 linkage group LG9, S_indicum_v1.0, whole genome shotgun sequence	pentatricopeptide repeat-containing protein At4g13650 isoform X2
	2416	NC_026146.1 - XP_011071047.1	83.582	67	11	0	3	69	1620	1686	4.62e-13	72.5	NC_026146.1_-_XP_011071047.1	79	56	56	0	83.58	1	1	CAGACGTACACCCACCATGATTTATGTCCGAGAATCACATGTTGAGAGGATGGGAAAGGTTCAGGAT	CAAACGTTCACCCACAACAATTTCTGTTCGTGAGTCACATGTTGATAAGATGGGAAAGGTTCAGGAT	69	3654	NC_026146.1_-_XP_011071047.1 Sesamum indicum cultivar Zhongzhi No. 13 linkage group LG2, S_indicum_v1.0, whole genome shotgun sequence	phospholipid-transporting ATPase 3
	2417	NC_026148.1 - XP_011076081.1	82.09	67	12	0	2	68	451	517	5.63e-12	68	NC_026148.1_-_XP_011076081.1	74	55	55	0	82.09	1	1	GCAGACGTACCGGTGACGCCGGTTTTCACAAGGGATAACAGCTTGAGAAGCAAAATGCTGAAGGAGA	GCGGATGTGCCGGTTGCTCCGGTTTTTGCTAGAGACAACAGCTTGAGAAGCAAAATGCTGAAAGAGA	69	984	NC_026148.1_-_XP_011076081.1 Sesamum indicum cultivar Zhongzhi No. 13 linkage group LG4, S_indicum_v1.0, whole genome shotgun sequence	probable membrane-associated kinase regulator 2
	2442	NC_026152.1 - XP_011087757.1	91.304	69	6	0	1	69	1281	1349	3.32e-21	98.7	NC_026152.1_-_XP_011087757.1	108	63	63	0	91.3	1	1	TGCAGACTACATGATGTCTATATGTGGTGATGATGGTCTGAGAGAGCTTTCTTCTCCAGGAAAGAGTGG	TGCAGATTATATGATGTCTATCTGTGGTGATGATGGTCTAAGAGAGCTCTCTTCTCCAGGAAAAAGTGG	69	2319	NC_026152.1_-_XP_011087757.1 Sesamum indicum cultivar Zhongzhi No. 13 linkage group LG8, S_indicum_v1.0, whole genome shotgun sequence	phosphatidylinositol 4-phosphate 5-kinase 8
	2442	NC_026152.1 - XP_011087758.1	91.304	69	6	0	1	69	1281	1349	3.32e-21	98.7	NC_026152.1_-_XP_011087758.1	108	63	63	0	91.3	1	1	TGCAGACTACATGATGTCTATATGTGGTGATGATGGTCTGAGAGAGCTTTCTTCTCCAGGAAAGAGTGG	TGCAGATTATATGATGTCTATCTGTGGTGATGATGGTCTAAGAGAGCTCTCTTCTCCAGGAAAAAGTGG	69	2319	NC_026152.1_-_XP_011087758.1 Sesamum indicum cultivar Zhongzhi No. 13 linkage group LG8, S_indicum_v1.0, whole genome shotgun sequence	phosphatidylinositol 4-phosphate 5-kinase 8
	2455	NC_026150.1 - XP_011079572.1	89.231	65	7	0	5	69	399	463	2.1e-17	86.9	NC_026150.1_-_XP_011079572.1	95	58	58	0	89.23	1	1	GACTATGGTTGCTTTGATGGGTGCAAATTTCTCTAAACCATTGGTGGCAAACAAGGTTACTCATC	GACTATGGTGGCGCTGATGGGTGCAAATTTTTCGAAGCCATTGGTGGCCAACAAGGTTACTCATC	69	3588	NC_026150.1_-_XP_011079572.1 Sesamum indicum cultivar Zhongzhi No. 13 linkage group LG6, S_indicum_v1.0, whole genome shotgun sequence	BRCT domain-containing protein At4g02110
	2456	NC_026150.1 - XP_011079572.1	89.231	65	7	0	5	69	399	463	2.1e-17	86.9	NC_026150.1_-_XP_011079572.1	95	58	58	0	89.23	1	1	GACTATGGTTGCTTTGATGGGTGCAAATTTCTCTAAACCATTGGTGGCAAACAAGGTTACTCATC	GACTATGGTGGCGCTGATGGGTGCAAATTTTTCGAAGCCATTGGTGGCCAACAAGGTTACTCATC	69	3588	NC_026150.1_-_XP_011079572.1 Sesamum indicum cultivar Zhongzhi No. 13 linkage group LG6, S_indicum_v1.0, whole genome shotgun sequence	BRCT domain-containing protein At4g02110
	2462	NC_026149.1 - XP_011078227.1	91.176	68	6	0	1	68	693	626	1.16e-20	96.9	NC_026149.1_-_XP_011078227.1	106	62	62	0	91.18	1	-1	TGCAGACTCAGATGCCAAAAGAGCATTTGCAAAGGGACCAGAGTAGCCAGTTGAATGAATGGCCTCCA	TGCAGATTCTAAGGCAAAAAGAGCATTTGCATAGGGACCAGAGTAGCCAGTTGAATGAATGGCCTCCA	69	1509	NC_026149.1_-_XP_011078227.1 Sesamum indicum cultivar Zhongzhi No. 13 linkage group LG5, S_indicum_v1.0, whole genome shotgun sequence	mitochondrial-processing peptidase subunit alpha
	2462	NC_026155.1 - XP_011093662.1	89.706	68	7	0	1	68	702	635	4.93e-19	92.4	NC_026155.1_-_XP_011093662.1	101	61	61	0	89.71	1	-1	TGCAGACTCAGATGCCAAAAGAGCATTTGCAAAGGGACCAGAGTAGCCAGTTGAATGAATGGCCTCCA	TGCAGATTCTGAAGCCAAAAGAGCATTTGCGTAGGGACCAGAGTAACCAGTTGAATGAATAGCCTCCA	69	1518	NC_026155.1_-_XP_011093662.1 Sesamum indicum cultivar Zhongzhi No. 13 linkage group LG11, S_indicum_v1.0, whole genome shotgun sequence	mitochondrial-processing peptidase subunit alpha
	2463	NC_026150.1 - XP_011079683.1	82.812	64	11	0	4	67	635	698	1.96e-11	67.1	NC_026150.1_-_XP_011079683.1	73	53	53	0	82.81	1	1	AGACTCAGGGTAACGGGTCCCTGAAAGATAATATCATTACAGTGTTTGGCACAAGTACTTTTTC	AGACACAGGGCAGTGGATCCCTCCAGGAGAATATTATCACAGTGTTTGGCACAAGTACTTTTTC	69	2772	NC_026150.1_-_XP_011079683.1 Sesamum indicum cultivar Zhongzhi No. 13 linkage group LG6, S_indicum_v1.0, whole genome shotgun sequence	DNA mismatch repair protein PMS1
	2474	NC_026157.1 - XP_011097131.1	84.746	59	9	0	1	59	2252	2194	1.96e-11	67.1	NC_026157.1_-_XP_011097131.1	73	50	50	0	84.75	1	-1	TGCAGACTCCTACTCAAGCCAACAAGACACACAGAGTCTCCACGACGTAGTGCAGGTTC	TGTAGACTCCTACTCAGACCCACAAGGCATACAGAATCTCCACGACGCAATGCAGGTTC	69	3321	NC_026157.1_-_XP_011097131.1 Sesamum indicum cultivar Zhongzhi No. 13 linkage group LG13, S_indicum_v1.0, whole genome shotgun sequence	protease Do-like 7 isoform X2
	2474	NC_026157.1 - XP_020554229.1	84.746	59	9	0	1	59	2252	2194	1.96e-11	67.1	NC_026157.1_-_XP_020554229.1	73	50	50	0	84.75	1	-1	TGCAGACTCCTACTCAAGCCAACAAGACACACAGAGTCTCCACGACGTAGTGCAGGTTC	TGTAGACTCCTACTCAGACCCACAAGGCATACAGAATCTCCACGACGCAATGCAGGTTC	69	2682	NC_026157.1_-_XP_020554229.1 Sesamum indicum cultivar Zhongzhi No. 13 linkage group LG13, S_indicum_v1.0, whole genome shotgun sequence	protease Do-like 7 isoform X2
	2488	NC_026156.1 - XP_011096550.1	90.566	53	5	0	10	62	332	384	1.32e-13	74.3	NC_026156.1_-_XP_011096550.1	81	48	48	0	90.57	1	1	TCAAGCTACAGCAAAGAATTCAAGCTCTTCAGGCTGGAAAAGGAAAGGCCTAA	TCAAGCTACAACAAAGAATTCAGGCTCTGCAGGCTGGAAAAGGCAAGGCATAA	69	384	NC_026156.1_-_XP_011096550.1 Sesamum indicum cultivar Zhongzhi No. 13 linkage group LG12, S_indicum_v1.0, whole genome shotgun sequence	prefoldin subunit 6
	2515	NC_026152.1 - XP_011088625.1	93.22	59	4	0	9	67	1570	1628	1.72e-18	89.7	NC_026152.1_-_XP_011088625.1	98	55	55	0	93.22	1	1	GAGCCAGATTTTGATCTTGATATAAAGGACGATGTCCGGGAAGAATGTTCGAAATTTGG	GAACCAGATTTTGATCTTGATATCAAGGACGATGTCCAGGAAGAATGTTCAAAATTTGG	69	1815	NC_026152.1_-_XP_011088625.1 Sesamum indicum cultivar Zhongzhi No. 13 linkage group LG8, S_indicum_v1.0, whole genome shotgun sequence	RNA-binding protein 39 isoform X2
	2515	NC_026152.1 - XP_011088626.1	93.22	59	4	0	9	67	1492	1550	1.72e-18	89.7	NC_026152.1_-_XP_011088626.1	98	55	55	0	93.22	1	1	GAGCCAGATTTTGATCTTGATATAAAGGACGATGTCCGGGAAGAATGTTCGAAATTTGG	GAACCAGATTTTGATCTTGATATCAAGGACGATGTCCAGGAAGAATGTTCAAAATTTGG	69	1737	NC_026152.1_-_XP_011088626.1 Sesamum indicum cultivar Zhongzhi No. 13 linkage group LG8, S_indicum_v1.0, whole genome shotgun sequence	RNA-binding protein 39 isoform X2
	2520	NC_026150.1 - XP_011080752.1	88.679	53	6	0	1	53	487	435	1.61e-12	69.8	NC_026150.1_-_XP_011080752.1	76	47	47	0	88.68	1	-1	TGCAGACTGCCCAGAGCAAGAACCTTTCTTCACTAGCAGTCTTGTACATCTTA	TGCAAACCGCCCAGAGTAAGAACCTTTCTTCACCAGCAATCTTGTACATTTTA	69	3036	NC_026150.1_-_XP_011080752.1 Sesamum indicum cultivar Zhongzhi No. 13 linkage group LG6, S_indicum_v1.0, whole genome shotgun sequence	N-terminal acetyltransferase B complex auxiliary subunit NAA25
	2528	NC_026147.1 - XP_011073453.1	84.058	69	11	0	1	69	3251	3319	3.79e-14	76.1	NC_026147.1_-_XP_011073453.1	83	58	58	0	84.06	1	1	TGCAGACTGCTTATAATGCATTACAAGAAGCACATTCACAAGCAAAGCAGGAAAATGCATCTTTGCTGA	TGCAGAAAGCTTATAATGCATTACAGGAAGCATACTCTCAAGCAAATCAGGACAATACGTATTTGCTGA	69	5472	NC_026147.1_-_XP_011073453.1 Sesamum indicum cultivar Zhongzhi No. 13 linkage group LG3, S_indicum_v1.0, whole genome shotgun sequence	protein NETWORKED 1A-like
	2529	NC_026156.1 - XP_011096359.1	89.286	56	6	0	3	58	1129	1184	3.79e-14	75.2	NC_026156.1_-_XP_011096359.1	82	50	50	0	89.29	1	1	CAGACTGGAATCGGCACCTCCATCGCCATTGCTGGAGTGGCTATGTACTCCTTCAT	CAGACTGGTATTGGCACCTCCATTGCTATTGCTGGAGTTGCAATGTACTCCTTCAT	69	1230	NC_026156.1_-_XP_011096359.1 Sesamum indicum cultivar Zhongzhi No. 13 linkage group LG12, S_indicum_v1.0, whole genome shotgun sequence	triose phosphate/phosphate translocator, chloroplastic
	2537	NC_026149.1 - XP_011078133.1	87.719	57	7	0	1	57	362	418	4.62e-13	72.5	NC_026149.1_-_XP_011078133.1	79	50	50	0	87.72	1	1	TGCAGACTGGTGCCCAAGTGGTTTACTCAAAGTATGCAGGCACAGAAGTGGAGTTCA	TGAAGACTGGCACCCAAGTGGTGTACTCAAAGTATGCCGGGACAGAAGTGGAATTCA	69	774	NC_026149.1_-_XP_011078133.1 Sesamum indicum cultivar Zhongzhi No. 13 linkage group LG5, S_indicum_v1.0, whole genome shotgun sequence	20 kDa chaperonin, chloroplastic-like
	2551	NC_026147.1 - XP_011074338.1	86.567	67	9	0	3	69	319	253	8.92e-16	81.5	NC_026147.1_-_XP_011074338.1	89	58	58	0	86.57	1	-1	CAGACTTAGCAATTTTTGACAACTGCTTCAAACTATTGGGGATCTCATCTGAATCAGACTTCAAAAA	CAGACTGAGCAATTTTCGACAATTGCTTCAAACTATTAGGAATTTCGTCCGAATCAGACTTCAGAAA	69	1308	NC_026147.1_-_XP_011074338.1 Sesamum indicum cultivar Zhongzhi No. 13 linkage group LG3, S_indicum_v1.0, whole genome shotgun sequence	protein PHLOEM PROTEIN 2-LIKE A10
	2552	NC_026152.1 - XP_011088625.1	92.857	56	4	0	12	67	1573	1628	7.32e-17	84.2	NC_026152.1_-_XP_011088625.1	92	52	52	0	92.86	1	1	CCAGAGTTTGATCTTGATATAAAGGACGATGTCCGGGAAGAATGTTCGAAATTTGG	CCAGATTTTGATCTTGATATCAAGGACGATGTCCAGGAAGAATGTTCAAAATTTGG	69	1815	NC_026152.1_-_XP_011088625.1 Sesamum indicum cultivar Zhongzhi No. 13 linkage group LG8, S_indicum_v1.0, whole genome shotgun sequence	RNA-binding protein 39 isoform X2
	2552	NC_026152.1 - XP_011088626.1	92.857	56	4	0	12	67	1495	1550	7.32e-17	84.2	NC_026152.1_-_XP_011088626.1	92	52	52	0	92.86	1	1	CCAGAGTTTGATCTTGATATAAAGGACGATGTCCGGGAAGAATGTTCGAAATTTGG	CCAGATTTTGATCTTGATATCAAGGACGATGTCCAGGAAGAATGTTCAAAATTTGG	69	1737	NC_026152.1_-_XP_011088626.1 Sesamum indicum cultivar Zhongzhi No. 13 linkage group LG8, S_indicum_v1.0, whole genome shotgun sequence	RNA-binding protein 39 isoform X2
	2562	NC_026159.1 - XP_011098724.1	88.406	69	8	0	1	69	300	368	1.72e-18	89.7	NC_026159.1_-_XP_011098724.1	98	61	61	0	88.41	1	1	TGCAGACTTGACATACTGGGAGAGCGCAGCTCGCATGATTGCTGATGTGTCTAAGTCGGATAAGATTGT	TGCAGATTTGACATATTGGGAGAGTGCAGCCCGCATGATTGCTGATGTATCAAAATCTGATAAGATTGT	69	1443	NC_026159.1_-_XP_011098724.1 Sesamum indicum cultivar Zhongzhi No. 13 linkage group LG15, S_indicum_v1.0, whole genome shotgun sequence	UDP-glucose 6-dehydrogenase 1
	2562	NC_026159.1 - XP_011098723.1	88.406	69	8	0	1	69	300	368	1.72e-18	89.7	NC_026159.1_-_XP_011098723.1	98	61	61	0	88.41	1	1	TGCAGACTTGACATACTGGGAGAGCGCAGCTCGCATGATTGCTGATGTGTCTAAGTCGGATAAGATTGT	TGCAGATTTGACATATTGGGAGAGTGCAGCCCGCATGATTGCTGATGTATCAAAATCTGATAAGATTGT	69	1443	NC_026159.1_-_XP_011098723.1 Sesamum indicum cultivar Zhongzhi No. 13 linkage group LG15, S_indicum_v1.0, whole genome shotgun sequence	UDP-glucose 6-dehydrogenase 1
	2563	NC_026159.1 - XP_011098724.1	91.304	69	6	0	1	69	300	368	3.32e-21	98.7	NC_026159.1_-_XP_011098724.1	108	63	63	0	91.3	1	1	TGCAGACTTGACATACTGGGAGAGTGCAGCCCGCATGATTGCTGATGTGTCCAAGTCGGATAAGATTGT	TGCAGATTTGACATATTGGGAGAGTGCAGCCCGCATGATTGCTGATGTATCAAAATCTGATAAGATTGT	69	1443	NC_026159.1_-_XP_011098724.1 Sesamum indicum cultivar Zhongzhi No. 13 linkage group LG15, S_indicum_v1.0, whole genome shotgun sequence	UDP-glucose 6-dehydrogenase 1
	2563	NC_026159.1 - XP_011098723.1	91.304	69	6	0	1	69	300	368	3.32e-21	98.7	NC_026159.1_-_XP_011098723.1	108	63	63	0	91.3	1	1	TGCAGACTTGACATACTGGGAGAGTGCAGCCCGCATGATTGCTGATGTGTCCAAGTCGGATAAGATTGT	TGCAGATTTGACATATTGGGAGAGTGCAGCCCGCATGATTGCTGATGTATCAAAATCTGATAAGATTGT	69	1443	NC_026159.1_-_XP_011098723.1 Sesamum indicum cultivar Zhongzhi No. 13 linkage group LG15, S_indicum_v1.0, whole genome shotgun sequence	UDP-glucose 6-dehydrogenase 1
	2570	NC_026148.1 - XP_011076550.1	89.394	66	7	0	1	66	1929	1994	6.01e-18	88.7	NC_026148.1_-_XP_011076550.1	97	59	59	0	89.39	1	1	TGCAGACTTGATGATGCTAATGTTGGATAATGATATTAGACCAAATGTGAATCTGTCAACCGATGC	TGCAGACTTGATGATGCTAATGTTGGATAAAAAGATTAGACCATATATGAATCTCTCAACTGATGC	69	2373	NC_026148.1_-_XP_011076550.1 Sesamum indicum cultivar Zhongzhi No. 13 linkage group LG4, S_indicum_v1.0, whole genome shotgun sequence	pentatricopeptide repeat-containing protein At1g02060, chloroplastic
	2571	NC_026148.1 - XP_011076550.1	89.394	66	7	0	1	66	1929	1994	6.01e-18	88.7	NC_026148.1_-_XP_011076550.1	97	59	59	0	89.39	1	1	TGCAGACTTGATGATGCTAATGTTGGATAATGATATTAGACCAAATGTGAATCTGTCAACCGATGC	TGCAGACTTGATGATGCTAATGTTGGATAAAAAGATTAGACCATATATGAATCTCTCAACTGATGC	69	2373	NC_026148.1_-_XP_011076550.1 Sesamum indicum cultivar Zhongzhi No. 13 linkage group LG4, S_indicum_v1.0, whole genome shotgun sequence	pentatricopeptide repeat-containing protein At1g02060, chloroplastic
	2572	NC_026152.1 - XP_011088060.1	90.625	64	6	0	6	69	575	638	1.72e-18	89.7	NC_026152.1_-_XP_011088060.1	98	58	58	0	90.62	1	1	ACTTGATGGAGTATAATAGCAATCCTGGTGACATAATGGAAATTTCACCTCTATTTTCTGAGGA	ACTTGATGGAGTTCAATAGCAGTCCTGGTGACTTAATGGAACTTTCACCTCTATTTTCTGATGA	69	2505	NC_026152.1_-_XP_011088060.1 Sesamum indicum cultivar Zhongzhi No. 13 linkage group LG8, S_indicum_v1.0, whole genome shotgun sequence	exocyst complex component SEC10b
	2572	NC_026154.1 - XP_011092514.1	85.938	64	9	0	6	69	575	638	3.79e-14	76.1	NC_026154.1_-_XP_011092514.1	83	55	55	0	85.94	1	1	ACTTGATGGAGTATAATAGCAATCCTGGTGACATAATGGAAATTTCACCTCTATTTTCTGAGGA	ACTTGATGGAGTTCAACAGCAGTCCCGGTGACCTAATGGAACTGTCACCTCTATTTTCTGATGA	69	2508	NC_026154.1_-_XP_011092514.1 Sesamum indicum cultivar Zhongzhi No. 13 linkage group LG10, S_indicum_v1.0, whole genome shotgun sequence	exocyst complex component SEC10b
	2575	NC_026145.1 - XP_011092387.1	88.889	63	7	0	7	69	5685	5623	2.56e-16	83.3	NC_026145.1_-_XP_011092387.1	91	56	56	0	88.89	1	-1	CTTGCCACCTCCTCGCGTGACTGCATTTATTTGTACCTCAATGTTGCTCATCTGCTTGATCAT	CTTGCCAACTCCACGAGTAATTGCATTTATTTGTTGCTCAATGTTGCTCATCTGCTTGATCAT	69	6666	NC_026145.1_-_XP_011092387.1 Sesamum indicum cultivar Zhongzhi No. 13 linkage group LG1, S_indicum_v1.0, whole genome shotgun sequence	mediator of RNA polymerase II transcription subunit 12 isoform X2
	2575	NC_026145.1 - XP_011092371.1	88.889	63	7	0	7	69	5685	5623	2.56e-16	83.3	NC_026145.1_-_XP_011092371.1	91	56	56	0	88.89	1	-1	CTTGCCACCTCCTCGCGTGACTGCATTTATTTGTACCTCAATGTTGCTCATCTGCTTGATCAT	CTTGCCAACTCCACGAGTAATTGCATTTATTTGTTGCTCAATGTTGCTCATCTGCTTGATCAT	69	6666	NC_026145.1_-_XP_011092371.1 Sesamum indicum cultivar Zhongzhi No. 13 linkage group LG1, S_indicum_v1.0, whole genome shotgun sequence	mediator of RNA polymerase II transcription subunit 12 isoform X2
	2577	NC_026146.1 - XP_011070313.1	84.127	63	10	0	5	67	756	818	1.61e-12	69.8	NC_026146.1_-_XP_011070313.1	76	53	53	0	84.13	1	1	GACTTGCTTACTGCTAGTGATATTCGGAATCGTGCTTCTCATAGTGATCATAGTGCTTGCTGC	GACTTGCTTGCTACTCGTGATTTTCGGCATTGTGCTTCTCATTGTGATTATAGTACTTGCCGC	69	822	NC_026146.1_-_XP_011070313.1 Sesamum indicum cultivar Zhongzhi No. 13 linkage group LG2, S_indicum_v1.0, whole genome shotgun sequence	syntaxin-22
	2577	NC_026150.1 - XP_011082353.1	83.607	61	10	0	7	67	758	818	1.96e-11	66.2	NC_026150.1_-_XP_011082353.1	72	51	51	0	83.61	1	1	CTTGCTTACTGCTAGTGATATTCGGAATCGTGCTTCTCATAGTGATCATAGTGCTTGCTGC	CTTGCTTGCTACTAGTGATTTTTGGCGTTGTGCTTCTCATAGTAATTATAGTACTTGCTGC	69	822	NC_026150.1_-_XP_011082353.1 Sesamum indicum cultivar Zhongzhi No. 13 linkage group LG6, S_indicum_v1.0, whole genome shotgun sequence	syntaxin-22
	2578	NC_026154.1 - XP_011092424.1	84.483	58	9	0	6	63	2141	2198	6.86e-11	65.3	NC_026154.1_-_XP_011092424.1	71	49	49	0	84.48	1	1	ACTTGGCGTCTTCTAGTGGACACAAGGGAATATCTGGCTTCCTTGCTGAGACTTCCTT	ACCTGGCTTCTTCCCGTGGACATAAGGGCATATCTGGTTTTCTTGCTGAGACTGCCTT	69	3066	NC_026154.1_-_XP_011092424.1 Sesamum indicum cultivar Zhongzhi No. 13 linkage group LG10, S_indicum_v1.0, whole genome shotgun sequence	calmodulin-binding transcription activator 2
	2581	NC_026154.1 - XP_011091081.1	88.406	69	8	0	1	69	1132	1064	1.72e-18	89.7	NC_026154.1_-_XP_011091081.1	98	61	61	0	88.41	1	-1	TGCAGACTTGTACAATCTTTTGCTGTTCCGATGGGACCTGCTCCAATGGGATCTGTGCACCAAGGTCTC	TGCAGACTTGGACTATCTTTTGTTGTTCTGATGGAACCTGCTCCAAGGGGATCTGTGCCCCTAGGTCTC	69	1749	NC_026154.1_-_XP_011091081.1 Sesamum indicum cultivar Zhongzhi No. 13 linkage group LG10, S_indicum_v1.0, whole genome shotgun sequence	pyruvate kinase isozyme A, chloroplastic
	2585	NC_026159.1 - XP_011098825.1	95.312	64	3	0	1	64	475	412	2.73e-22	103	NC_026159.1_-_XP_011098825.1	113	61	61	0	95.31	1	-1	TGCAGACTTGTGGATACACTGATGGAGGAAGTGCAAGGTAGAAGAGCCTCCGGGATGATCCTTC	TGCAGACTTGTGGATATACTGATGGAGGAAGTGCAAGATAGAAAAGCCTCCGGGATGATCCTTC	69	1545	NC_026159.1_-_XP_011098825.1 Sesamum indicum cultivar Zhongzhi No. 13 linkage group LG15, S_indicum_v1.0, whole genome shotgun sequence	glucose-6-phosphate 1-dehydrogenase, cytoplasmic isoform
	2585	NC_026159.1 - XP_011098824.1	95.312	64	3	0	1	64	475	412	2.73e-22	103	NC_026159.1_-_XP_011098824.1	113	61	61	0	95.31	1	-1	TGCAGACTTGTGGATACACTGATGGAGGAAGTGCAAGGTAGAAGAGCCTCCGGGATGATCCTTC	TGCAGACTTGTGGATATACTGATGGAGGAAGTGCAAGATAGAAAAGCCTCCGGGATGATCCTTC	69	1545	NC_026159.1_-_XP_011098824.1 Sesamum indicum cultivar Zhongzhi No. 13 linkage group LG15, S_indicum_v1.0, whole genome shotgun sequence	glucose-6-phosphate 1-dehydrogenase, cytoplasmic isoform
	2586	NC_026150.1 - XP_011080461.1	94.203	69	4	0	1	69	651	719	6.42e-24	107	NC_026150.1_-_XP_011080461.1	118	65	65	0	94.2	1	1	TGCAGACTTGTGGTCATGTGGAGTCATACTCTTTGTATTGCTTGCCGGTTACTTGCCGTTTGATGATTC	TGCCGACTTGTGGTCATGTGGAGTCATACTCTTTGTATTGCTTGCAGGTTACTTGCCTTTCGATGATTC	69	1392	NC_026150.1_-_XP_011080461.1 Sesamum indicum cultivar Zhongzhi No. 13 linkage group LG6, S_indicum_v1.0, whole genome shotgun sequence	CBL-interacting serine/threonine-protein kinase 3 isoform X2
	2586	NC_026150.1 - XP_011080462.1	94.203	69	4	0	1	69	582	650	6.42e-24	107	NC_026150.1_-_XP_011080462.1	118	65	65	0	94.2	1	1	TGCAGACTTGTGGTCATGTGGAGTCATACTCTTTGTATTGCTTGCCGGTTACTTGCCGTTTGATGATTC	TGCCGACTTGTGGTCATGTGGAGTCATACTCTTTGTATTGCTTGCAGGTTACTTGCCTTTCGATGATTC	69	1323	NC_026150.1_-_XP_011080462.1 Sesamum indicum cultivar Zhongzhi No. 13 linkage group LG6, S_indicum_v1.0, whole genome shotgun sequence	CBL-interacting serine/threonine-protein kinase 3 isoform X2
	2587	NC_026150.1 - XP_011080461.1	89.855	69	7	0	1	69	651	719	1.41e-19	94.2	NC_026150.1_-_XP_011080461.1	103	62	62	0	89.86	1	1	TGCAGACTTGTGGTCTTGTGGTGTCATACTCTTTGTACTGCTTGCTGGTTACTTGCCGTTTGATGATTC	TGCCGACTTGTGGTCATGTGGAGTCATACTCTTTGTATTGCTTGCAGGTTACTTGCCTTTCGATGATTC	69	1392	NC_026150.1_-_XP_011080461.1 Sesamum indicum cultivar Zhongzhi No. 13 linkage group LG6, S_indicum_v1.0, whole genome shotgun sequence	CBL-interacting serine/threonine-protein kinase 3 isoform X2
	2587	NC_026150.1 - XP_011080462.1	89.855	69	7	0	1	69	582	650	1.41e-19	94.2	NC_026150.1_-_XP_011080462.1	103	62	62	0	89.86	1	1	TGCAGACTTGTGGTCTTGTGGTGTCATACTCTTTGTACTGCTTGCTGGTTACTTGCCGTTTGATGATTC	TGCCGACTTGTGGTCATGTGGAGTCATACTCTTTGTATTGCTTGCAGGTTACTTGCCTTTCGATGATTC	69	1323	NC_026150.1_-_XP_011080462.1 Sesamum indicum cultivar Zhongzhi No. 13 linkage group LG6, S_indicum_v1.0, whole genome shotgun sequence	CBL-interacting serine/threonine-protein kinase 3 isoform X2
	2588	NC_026150.1 - XP_011080461.1	89.855	69	7	0	1	69	651	719	1.41e-19	94.2	NC_026150.1_-_XP_011080461.1	103	62	62	0	89.86	1	1	TGCAGACTTGTGGTCTTGTGGTGTCATACTCTTTGTACTGCTTGCTGGTTACTTGCCGTTTGATGATTC	TGCCGACTTGTGGTCATGTGGAGTCATACTCTTTGTATTGCTTGCAGGTTACTTGCCTTTCGATGATTC	69	1392	NC_026150.1_-_XP_011080461.1 Sesamum indicum cultivar Zhongzhi No. 13 linkage group LG6, S_indicum_v1.0, whole genome shotgun sequence	CBL-interacting serine/threonine-protein kinase 3 isoform X2
	2588	NC_026150.1 - XP_011080462.1	89.855	69	7	0	1	69	582	650	1.41e-19	94.2	NC_026150.1_-_XP_011080462.1	103	62	62	0	89.86	1	1	TGCAGACTTGTGGTCTTGTGGTGTCATACTCTTTGTACTGCTTGCTGGTTACTTGCCGTTTGATGATTC	TGCCGACTTGTGGTCATGTGGAGTCATACTCTTTGTATTGCTTGCAGGTTACTTGCCTTTCGATGATTC	69	1323	NC_026150.1_-_XP_011080462.1 Sesamum indicum cultivar Zhongzhi No. 13 linkage group LG6, S_indicum_v1.0, whole genome shotgun sequence	CBL-interacting serine/threonine-protein kinase 3 isoform X2
	2591	NC_026145.1 - XP_020555150.1	90.164	61	6	0	5	65	1712	1652	7.32e-17	84.2	NC_026145.1_-_XP_020555150.1	92	55	55	0	90.16	1	-1	GACTTTGAAGAGAGGAAAGTATGGTGTTGCAGACGAGACATCCCAAAATCACAAACCTGAA	GACTTTGAAGATAGAAAAGTATGGTGCTGCAAACGTGACATCCCAAAATCACAAACCTTAA	69	2055	NC_026145.1_-_XP_020555150.1 Sesamum indicum cultivar Zhongzhi No. 13 linkage group LG1, S_indicum_v1.0, whole genome shotgun sequence	serine/threonine-protein kinase EDR1
	2593	NC_026152.1 - XP_011087232.1	89.552	67	7	0	3	69	542	476	1.72e-18	90.6	NC_026152.1_-_XP_011087232.1	99	60	60	0	89.55	1	-1	CAGACTTTGCCATCTGCACCTCTGTAGAATCTGAAGAATGGCAAGACATGAACATGTAGAGCATAGC	CACACTCTGCCGTCTGCACCTCTGTAGAATCTGAAGAAGGGCAAGACATGGACATGAAGCGCATAGC	69	825	NC_026152.1_-_XP_011087232.1 Sesamum indicum cultivar Zhongzhi No. 13 linkage group LG8, S_indicum_v1.0, whole genome shotgun sequence	thioredoxin-like 1-1, chloroplastic
	2593	NC_026147.1 - XP_011071719.1	82.609	69	12	0	1	69	535	467	4.62e-13	71.6	NC_026147.1_-_XP_011071719.1	78	57	57	0	82.61	1	-1	TGCAGACTTTGCCATCTGCACCTCTGTAGAATCTGAAGAATGGCAAGACATGAACATGTAGAGCATAGC	TGCAGAGCCTGCCGTCTTGACCCTTGTAGAATCGGAAGAAGGGCAAGACATGGACATGGAGAGCATAGC	69	744	NC_026147.1_-_XP_011071719.1 Sesamum indicum cultivar Zhongzhi No. 13 linkage group LG3, S_indicum_v1.0, whole genome shotgun sequence	thioredoxin-like 1-2, chloroplastic
	2610	NC_026146.1 - XP_011096161.1	89.394	66	7	0	4	69	772	837	6.01e-18	88.7	NC_026146.1_-_XP_011096161.1	97	59	59	0	89.39	1	1	AGAGAAAATCTGAGAAATGTCTTGTTGTCTGTCTACGGAAATAAGGAGTACGTGGATGACGACCTT	AGAGATAACCTGAGAAATGTCTTGTTGTCCGTCTATGGAAATAAGGAGTCTGTGGATGAGGACCTT	69	1155	NC_026146.1_-_XP_011096161.1 Sesamum indicum cultivar Zhongzhi No. 13 linkage group LG2, S_indicum_v1.0, whole genome shotgun sequence	pheophytinase, chloroplastic isoform X2
	2610	NC_026146.1 - XP_011096167.1	89.394	66	7	0	4	69	676	741	6.01e-18	88.7	NC_026146.1_-_XP_011096167.1	97	59	59	0	89.39	1	1	AGAGAAAATCTGAGAAATGTCTTGTTGTCTGTCTACGGAAATAAGGAGTACGTGGATGACGACCTT	AGAGATAACCTGAGAAATGTCTTGTTGTCCGTCTATGGAAATAAGGAGTCTGTGGATGAGGACCTT	69	1059	NC_026146.1_-_XP_011096167.1 Sesamum indicum cultivar Zhongzhi No. 13 linkage group LG2, S_indicum_v1.0, whole genome shotgun sequence	pheophytinase, chloroplastic isoform X2
	2614	NC_026153.1 - XP_011089642.1	82.353	68	12	0	2	69	1180	1247	1.61e-12	69.8	NC_026153.1_-_XP_011089642.1	76	56	56	0	82.35	1	1	GCAGAGAAAATTGAAGCAGCTGGTAAGAAGAAGGAAGAAGGGAATGCATTGTTCAGGGCCGGGAAATA	GCAGAAAAGATTGAGGCTGCTGGCAAGAAAAAGGAAGAAGGGAATGTTCTGTTCAAGGCTGGCAAATA	69	1722	NC_026153.1_-_XP_011089642.1 Sesamum indicum cultivar Zhongzhi No. 13 linkage group LG9, S_indicum_v1.0, whole genome shotgun sequence	peptidyl-prolyl cis-trans isomerase FKBP62
	2619	NC_026147.1 - XP_011071927.1	80.882	68	13	0	1	68	406	473	6.86e-11	65.3	NC_026147.1_-_XP_011071927.1	71	55	55	0	80.88	1	1	TGCAGAGAAACACTCTGTTCTGAGATAGTAGTGCAGTTTCTTGATGCGAATTTCATTTCTTGGGGTGG	TGCAGAGAGACCCTTTGCTCGGAAGTGGTCGTGCAGTTTCTTGATGCAAATTTCGTTTGCTGGGGTGG	69	1137	NC_026147.1_-_XP_011071927.1 Sesamum indicum cultivar Zhongzhi No. 13 linkage group LG3, S_indicum_v1.0, whole genome shotgun sequence	plant UBX domain-containing protein 10
	2627	NC_026159.1 - XP_011098470.1	82.353	68	12	0	1	68	758	691	1.61e-12	69.8	NC_026159.1_-_XP_011098470.1	76	56	56	0	82.35	1	-1	TGCAGAGAAACGGGATATTGCTCGCCGTCATAGTAAAGAGTACCGACGAAAGAATAGAGATCCTCATT	TGAAGAGAAAGGGGATACTGCTGACCGTCGTAGTAAAGAGTCCCTACGAACGTGTAAAGATCCTCATT	69	3573	NC_026159.1_-_XP_011098470.1 Sesamum indicum cultivar Zhongzhi No. 13 linkage group LG15, S_indicum_v1.0, whole genome shotgun sequence	probable phospholipid-transporting ATPase 8
	2651	NC_026145.1 - XP_011085655.1	89.062	64	7	0	1	64	712	649	7.32e-17	85.1	NC_026145.1_-_XP_011085655.1	93	57	57	0	89.06	1	-1	TGCAGAGAAATGGTAAATCAAGAACTGTTCCGCTGTGACAAGCATCTATGATGGCATGAAGCTT	TGCAAAGAAATGGCAAATCAAGGGCTGTTCCGCTATGACAGGCATCTATTATGGCATGAAGCTT	69	1128	NC_026145.1_-_XP_011085655.1 Sesamum indicum cultivar Zhongzhi No. 13 linkage group LG1, S_indicum_v1.0, whole genome shotgun sequence	metacaspase-1
	2651	NC_026148.1 - XP_011076545.1	87.097	62	8	0	3	64	707	646	1.09e-14	77	NC_026148.1_-_XP_011076545.1	84	54	54	0	87.1	1	-1	CAGAGAAATGGTAAATCAAGAACTGTTCCGCTGTGACAAGCATCTATGATGGCATGAAGCTT	CAAAGAAACGGTAAATCTAGCACTGTCCCACTGTGACATGCATCTATGATTGCATGAAGCTT	69	1110	NC_026148.1_-_XP_011076545.1 Sesamum indicum cultivar Zhongzhi No. 13 linkage group LG4, S_indicum_v1.0, whole genome shotgun sequence	metacaspase-1
	2655	NC_026154.1 - XP_011092158.1	82.812	64	11	0	1	64	1080	1017	1.96e-11	67.1	NC_026154.1_-_XP_011092158.1	73	53	53	0	82.81	1	-1	TGCAGAGAAATTGCCGCAACAAGTTTGCTGACACTTGACACGGTCCAGGACTCCAGCAGAAAGC	TGCAGAGGAACATCCGCAGCCAGTTTGTGGACATTTGGCATGGTCCAGGACTCCAGCAGAAAGC	69	1800	NC_026154.1_-_XP_011092158.1 Sesamum indicum cultivar Zhongzhi No. 13 linkage group LG10, S_indicum_v1.0, whole genome shotgun sequence	solute carrier family 40 member 3, chloroplastic isoform X3
	2655	NC_026154.1 - XP_020553099.1	82.812	64	11	0	1	64	1080	1017	1.96e-11	67.1	NC_026154.1_-_XP_020553099.1	73	53	53	0	82.81	1	-1	TGCAGAGAAATTGCCGCAACAAGTTTGCTGACACTTGACACGGTCCAGGACTCCAGCAGAAAGC	TGCAGAGGAACATCCGCAGCCAGTTTGTGGACATTTGGCATGGTCCAGGACTCCAGCAGAAAGC	69	1800	NC_026154.1_-_XP_020553099.1 Sesamum indicum cultivar Zhongzhi No. 13 linkage group LG10, S_indicum_v1.0, whole genome shotgun sequence	solute carrier family 40 member 3, chloroplastic isoform X3
	2657	NC_026148.1 - XP_011076021.1	82.609	69	12	0	1	69	168	236	4.62e-13	71.6	NC_026148.1_-_XP_011076021.1	78	57	57	0	82.61	1	1	TGCAGAGAACAAAATAAGTGGCGAAGTTGACTGGTACGGGGTGCTCAAAGTGAACCCCTCAGCTGATGA	TGCAGAGAATAAGATAAGTGGAGAAATTGATTGGTATGGGGTGCTTGGTGTGAGCCCGTCAGCTGATGA	69	2235	NC_026148.1_-_XP_011076021.1 Sesamum indicum cultivar Zhongzhi No. 13 linkage group LG4, S_indicum_v1.0, whole genome shotgun sequence	meiotically up-regulated gene 184 protein
	2658	NC_026148.1 - XP_011076021.1	86.957	69	9	0	1	69	168	236	7.32e-17	85.1	NC_026148.1_-_XP_011076021.1	93	60	60	0	86.96	1	1	TGCAGAGAACAAAGTAAGTGGAGAAGTTGACTGGTATGCGGTGCTTGGTGTGAACCCATCAGATGATGA	TGCAGAGAATAAGATAAGTGGAGAAATTGATTGGTATGGGGTGCTTGGTGTGAGCCCGTCAGCTGATGA	69	2235	NC_026148.1_-_XP_011076021.1 Sesamum indicum cultivar Zhongzhi No. 13 linkage group LG4, S_indicum_v1.0, whole genome shotgun sequence	meiotically up-regulated gene 184 protein
	2663	NC_026151.1 - XP_011084598.1	88.679	53	6	0	12	64	112	164	1.61e-12	69.8	NC_026151.1_-_XP_011084598.1	76	47	47	0	88.68	1	1	TGGGAGCGGGTGCGGGTGGCGGAGGAGGCGGAAGAGCGGCTGTGCTGGCAGCT	TGGGGGAGGGTGAGGGTGGCGGAGGAGGGGGAGGAGAGGCTGTGCTGGCAGCT	69	327	NC_026151.1_-_XP_011084598.1 Sesamum indicum cultivar Zhongzhi No. 13 linkage group LG7, S_indicum_v1.0, whole genome shotgun sequence	protein RESPONSE TO LOW SULFUR 3
	2663	NC_026148.1 - XP_011075838.1	88.889	54	5	1	16	68	146	199	5.63e-12	68	NC_026148.1_-_XP_011075838.1	74	48	48	1	88.89	1	1	AGCGGGTGCGGGTGGCGGAGGAGGCGGAAGAGCGGCTGTGCTGGCAGC-TGGCG	AGCGGCTGAGGGTGGCGGAGGAGGCGGAGGAGCGGCTTTGCTGCCAGCTTGGCG	69	306	NC_026148.1_-_XP_011075838.1 Sesamum indicum cultivar Zhongzhi No. 13 linkage group LG4, S_indicum_v1.0, whole genome shotgun sequence	protein RESPONSE TO LOW SULFUR 3-like
	2675	NC_026159.1 - XP_011098649.1	84.615	65	10	0	5	69	394	458	1.32e-13	73.4	NC_026159.1_-_XP_011098649.1	80	55	55	0	84.62	1	1	GAGAACTCAGAAGAAGCCTCCCATGTTACTGTCGGACTTGTAGTACCATCTGATCAGATTGGGTG	GAGGACTCAGAAGACGTCCCACAAGTCACTGTTCGACTTCTAGTACCATCTGATCAGATTGGGTG	69	1650	NC_026159.1_-_XP_011098649.1 Sesamum indicum cultivar Zhongzhi No. 13 linkage group LG15, S_indicum_v1.0, whole genome shotgun sequence	KH domain-containing protein At4g18375
	2675	NC_026159.1 - XP_011098648.1	84.615	65	10	0	5	69	394	458	1.32e-13	73.4	NC_026159.1_-_XP_011098648.1	80	55	55	0	84.62	1	1	GAGAACTCAGAAGAAGCCTCCCATGTTACTGTCGGACTTGTAGTACCATCTGATCAGATTGGGTG	GAGGACTCAGAAGACGTCCCACAAGTCACTGTTCGACTTCTAGTACCATCTGATCAGATTGGGTG	69	1650	NC_026159.1_-_XP_011098648.1 Sesamum indicum cultivar Zhongzhi No. 13 linkage group LG15, S_indicum_v1.0, whole genome shotgun sequence	KH domain-containing protein At4g18375
	2679	NC_026150.1 - XP_011080011.1	92.424	66	5	0	4	69	537	602	1.16e-20	97.8	NC_026150.1_-_XP_011080011.1	107	61	61	0	92.42	1	1	AGAGAACTTGCCTGCTGTTGCTTTACCAGATGACAGTGTAGTTGAGATACAGGGGGAGCCTGAAGG	AGAGAACTTGCCTGCAGTTGCTCTACCAGATGACAGTGTAGTTGAGATACAGGGTGAACCGGAAGG	69	1347	NC_026150.1_-_XP_011080011.1 Sesamum indicum cultivar Zhongzhi No. 13 linkage group LG6, S_indicum_v1.0, whole genome shotgun sequence	flowering locus K homology domain
	2696	NC_026155.1 - XP_011093361.1	91.304	69	6	0	1	69	993	1061	3.32e-21	98.7	NC_026155.1_-_XP_011093361.1	108	63	63	0	91.3	1	1	TGCAGAGAAGAGTACTGGGAGTGGTGGCAAGAAGAAGGGGGCGGCTCAGTTACGTGTCTATAATTTGGG	TGCAGAGAAGAGTACTGGCAGTGGTGGCAAGAAGAAGGGCCCAGCTCAATTACGGGTCTATAATTTGGG	69	1305	NC_026155.1_-_XP_011093361.1 Sesamum indicum cultivar Zhongzhi No. 13 linkage group LG11, S_indicum_v1.0, whole genome shotgun sequence	UDP-glucuronate 4-epimerase 3-like
	2696	NC_026145.1 - XP_011090567.1	86.765	68	9	0	2	69	988	1055	2.56e-16	83.3	NC_026145.1_-_XP_011090567.1	91	59	59	0	86.76	1	1	GCAGAGAAGAGTACTGGGAGTGGTGGCAAGAAGAAGGGGGCGGCTCAGTTACGTGTCTATAATTTGGG	GCTGAGAAAAGTACTGGCAGTGGCGGCAAGAAGAAGGGGCCAGCTCAATTGCGGGTCTATAATTTGGG	69	1299	NC_026145.1_-_XP_011090567.1 Sesamum indicum cultivar Zhongzhi No. 13 linkage group LG1, S_indicum_v1.0, whole genome shotgun sequence	UDP-glucuronate 4-epimerase 3
	2701	NC_026148.1 - XP_011075907.1	84.058	69	11	0	1	69	3049	2981	3.79e-14	76.1	NC_026148.1_-_XP_011075907.1	83	58	58	0	84.06	1	-1	TGCAGAGAAGCTCCATCAAAGTTACTCCATAGCTGTATACATCACATTTATCAGTCAACTTTGTTGAGT	TGCAAAGAAGCTCCAGTAAAATAACCCCATAACTGTATACATCGCTTTTATCCGTCAACCTTGTTGAGT	69	3342	NC_026148.1_-_XP_011075907.1 Sesamum indicum cultivar Zhongzhi No. 13 linkage group LG4, S_indicum_v1.0, whole genome shotgun sequence	receptor-like protein kinase
	2703	NC_026153.1 - XP_011089914.1	85.484	62	9	0	2	63	1057	1118	4.62e-13	72.5	NC_026153.1_-_XP_011089914.1	79	53	53	0	85.48	1	1	GCAGAGAAGGAATTGATCATCTCCGGGACTATACAGAGAGTGCTTGATCTATTTTTTGAGTA	GCTGAGAAGGAATTGGTCAGCTCTGGGACAATTCAGAGAGTTCTTGATCTCTTCTTTGAGTA	69	2562	NC_026153.1_-_XP_011089914.1 Sesamum indicum cultivar Zhongzhi No. 13 linkage group LG9, S_indicum_v1.0, whole genome shotgun sequence	serine/threonine-protein phosphatase 6 regulatory subunit 3 isoform X2
	2703	NC_026153.1 - XP_011089916.1	85.484	62	9	0	2	63	1057	1118	4.62e-13	72.5	NC_026153.1_-_XP_011089916.1	79	53	53	0	85.48	1	1	GCAGAGAAGGAATTGATCATCTCCGGGACTATACAGAGAGTGCTTGATCTATTTTTTGAGTA	GCTGAGAAGGAATTGGTCAGCTCTGGGACAATTCAGAGAGTTCTTGATCTCTTCTTTGAGTA	69	2559	NC_026153.1_-_XP_011089916.1 Sesamum indicum cultivar Zhongzhi No. 13 linkage group LG9, S_indicum_v1.0, whole genome shotgun sequence	serine/threonine-protein phosphatase 6 regulatory subunit 3 isoform X2
	2704	NC_026153.1 - XP_011089914.1	85.484	62	9	0	2	63	1057	1118	4.62e-13	72.5	NC_026153.1_-_XP_011089914.1	79	53	53	0	85.48	1	1	GCAGAGAAGGAATTGATCATCTCCGGGACTATACAGAGAGTGCTTGATCTATTTTTTGAGTA	GCTGAGAAGGAATTGGTCAGCTCTGGGACAATTCAGAGAGTTCTTGATCTCTTCTTTGAGTA	69	2562	NC_026153.1_-_XP_011089914.1 Sesamum indicum cultivar Zhongzhi No. 13 linkage group LG9, S_indicum_v1.0, whole genome shotgun sequence	serine/threonine-protein phosphatase 6 regulatory subunit 3 isoform X2
	2704	NC_026153.1 - XP_011089916.1	85.484	62	9	0	2	63	1057	1118	4.62e-13	72.5	NC_026153.1_-_XP_011089916.1	79	53	53	0	85.48	1	1	GCAGAGAAGGAATTGATCATCTCCGGGACTATACAGAGAGTGCTTGATCTATTTTTTGAGTA	GCTGAGAAGGAATTGGTCAGCTCTGGGACAATTCAGAGAGTTCTTGATCTCTTCTTTGAGTA	69	2559	NC_026153.1_-_XP_011089916.1 Sesamum indicum cultivar Zhongzhi No. 13 linkage group LG9, S_indicum_v1.0, whole genome shotgun sequence	serine/threonine-protein phosphatase 6 regulatory subunit 3 isoform X2
	2719	NC_026155.1 - XP_011094307.1	86.957	69	9	0	1	69	2430	2362	7.32e-17	85.1	NC_026155.1_-_XP_011094307.1	93	60	60	0	86.96	1	-1	TGCAGAGAAGTCGGCATTATCGTTGAGGTTATTTACTGCTTGAGTAAAGCTTTCCTGCCATTTTCTTTT	TGCAGAGAAATCTGCATTATCCTTGAGGTTACTTTCTGCTTGGGTAAAGCAATCCTGCCATTTCCTTTT	69	3030	NC_026155.1_-_XP_011094307.1 Sesamum indicum cultivar Zhongzhi No. 13 linkage group LG11, S_indicum_v1.0, whole genome shotgun sequence	kinesin-like protein KIN-5C
	2742	NC_026147.1 - XP_011072514.1	89.706	68	7	0	2	69	1202	1135	4.93e-19	92.4	NC_026147.1_-_XP_011072514.1	101	61	61	0	89.71	1	-1	GCAGAGAATCCTTTTCCCTCATTCAGGGCATTATCAAATGCTTCTTTGAACTTATCCAAAGTTCCAGA	GCAGCAAATCCTTTTCCCTCATTCAAGGCTCTATCAAATGCTTCTTTGAATTTATCCAAGGTTCCAGA	69	2436	NC_026147.1_-_XP_011072514.1 Sesamum indicum cultivar Zhongzhi No. 13 linkage group LG3, S_indicum_v1.0, whole genome shotgun sequence	protein ROOT HAIR DEFECTIVE 3 homolog 1
	2742	NC_026145.1 - XP_011080144.2	83.824	68	11	0	2	69	1195	1128	1.32e-13	74.3	NC_026145.1_-_XP_011080144.2	81	57	57	0	83.82	1	-1	GCAGAGAATCCTTTTCCCTCATTCAGGGCATTATCAAATGCTTCTTTGAACTTATCCAAAGTTCCAGA	GCAGCAAATCCTTTACCACCATTCAAGGCACTATCAAATGCTTCTTTGAATCTCTCCAAGGTTCCAGA	69	2441	NC_026145.1_-_XP_011080144.2 Sesamum indicum cultivar Zhongzhi No. 13 linkage group LG1, S_indicum_v1.0, whole genome shotgun sequence	protein ROOT HAIR DEFECTIVE 3
	2744	NC_026146.1 - XP_011069941.1	89.855	69	7	0	1	69	233	165	1.41e-19	94.2	NC_026146.1_-_XP_011069941.1	103	62	62	0	89.86	1	-1	TGCAGAGAATCTGCGGCGATGAAATGGTAGTTCATGGCGTAGATGTTGTTGGTGGAGATGAAGTGGAAG	TGCAGAGAATCGGCAGCCAAGAAATGGTAGTTCATGGCGTATATGTCGTTGGTGGAAATGAAGTGGAAG	69	1881	NC_026146.1_-_XP_011069941.1 Sesamum indicum cultivar Zhongzhi No. 13 linkage group LG2, S_indicum_v1.0, whole genome shotgun sequence	auxin efflux carrier component 2
	2749	NC_026152.1 - XP_011085379.1	87.879	66	8	0	2	67	2161	2226	7.32e-17	84.2	NC_026152.1_-_XP_011085379.1	92	58	58	0	87.88	1	1	GCAGAGAATGCTGCTGCCATTATGCAAGAAAGGGGTTTCTCAAATTCTCGAAGATCCCGGCATCGT	GCCGAGAATGCTGTTGCAATTATGCAAGAAAGGGGTTTCTCTAATCCACGAAGATCTAGGCATCGT	69	5394	NC_026152.1_-_XP_011085379.1 Sesamum indicum cultivar Zhongzhi No. 13 linkage group LG8, S_indicum_v1.0, whole genome shotgun sequence	homeobox-DDT domain protein RLT2-like
	2751	NC_026155.1 - XP_011095038.1	86.765	68	9	0	1	68	1004	937	2.56e-16	83.3	NC_026155.1_-_XP_011095038.1	91	59	59	0	86.76	1	-1	TGCAGAGAATGGGATGTGACTCGATCCGACCCATTTGGCATTAGCAAAACTGTGAACTTGATGTGAGC	TGCAGAGGATGAGTTGTGATTCGATCCGACCCATTCGGCATTAGCAAAACAGTAAATTTGATGTGTGC	69	1185	NC_026155.1_-_XP_011095038.1 Sesamum indicum cultivar Zhongzhi No. 13 linkage group LG11, S_indicum_v1.0, whole genome shotgun sequence	ERBB-3 BINDING PROTEIN 1
	2751	NC_026149.1 - XP_011077533.1	86.765	68	9	0	1	68	1004	937	2.56e-16	83.3	NC_026149.1_-_XP_011077533.1	91	59	59	0	86.76	1	-1	TGCAGAGAATGGGATGTGACTCGATCCGACCCATTTGGCATTAGCAAAACTGTGAACTTGATGTGAGC	TGTAGAGGGTGGGATGTGATTCGATCGGACCCATTTGGCATTAGCAAAACAGTAAACTTTATGTGTGC	69	1185	NC_026149.1_-_XP_011077533.1 Sesamum indicum cultivar Zhongzhi No. 13 linkage group LG5, S_indicum_v1.0, whole genome shotgun sequence	ERBB-3 BINDING PROTEIN 1
	2752	NC_026147.1 - XP_020548411.1	85	60	9	0	2	61	337	396	5.63e-12	68.9	NC_026147.1_-_XP_020548411.1	75	51	51	0	85	1	1	GCAGAGAATGGGCATGTCTTGGTTGTAGGGGAGTTGTTGAAGCATTCAGATGCTGAGACT	GCTGAGAATGGGCATACTTTGGTTGTTGGGGAGTTCTTGAGGCATTCGGATGCTGAAACT	69	1728	NC_026147.1_-_XP_020548411.1 Sesamum indicum cultivar Zhongzhi No. 13 linkage group LG3, S_indicum_v1.0, whole genome shotgun sequence	ankyrin repeat-containing protein At5g02620
	2752	NC_026147.1 - XP_011074001.1	85	60	9	0	2	61	337	396	5.63e-12	68.9	NC_026147.1_-_XP_011074001.1	75	51	51	0	85	1	1	GCAGAGAATGGGCATGTCTTGGTTGTAGGGGAGTTGTTGAAGCATTCAGATGCTGAGACT	GCTGAGAATGGGCATACTTTGGTTGTTGGGGAGTTCTTGAGGCATTCGGATGCTGAAACT	69	1728	NC_026147.1_-_XP_011074001.1 Sesamum indicum cultivar Zhongzhi No. 13 linkage group LG3, S_indicum_v1.0, whole genome shotgun sequence	ankyrin repeat-containing protein At5g02620
	2754	NC_026159.1 - XP_011098546.1	89.091	55	6	0	1	55	2442	2388	1.32e-13	73.4	NC_026159.1_-_XP_011098546.1	80	49	49	0	89.09	1	-1	TGCAGAGAATGTTTGTATGACTAGTGCCATCCGATCGCCTACAAGAGACCTCACC	TGCAGAGAATGTCTGGATGAGCAGTGCCATCCGATCACCTACCAGAGACCTCACC	69	3774	NC_026159.1_-_XP_011098546.1 Sesamum indicum cultivar Zhongzhi No. 13 linkage group LG15, S_indicum_v1.0, whole genome shotgun sequence	ABC transporter B family member 15-like
	2761	NC_026146.1 - XP_020554732.1	82.353	68	12	0	2	69	773	706	1.61e-12	69.8	NC_026146.1_-_XP_020554732.1	76	56	56	0	82.35	1	-1	GCAGAGAATTTATTCTTCATTTCCTCAACGGTGGCAGTCTCCCACTGAGGGACCCTTCCTTGTGGATC	GCAGAGAACTTATTCTTCATCTCCAGAACACTAGATTTGTCCCACTGAGGGACCCTTCCTTCTGGATC	69	1041	NC_026146.1_-_XP_020554732.1 Sesamum indicum cultivar Zhongzhi No. 13 linkage group LG2, S_indicum_v1.0, whole genome shotgun sequence	thylakoid lumenal 29 kDa protein, chloroplastic
	2761	NC_026146.1 - XP_011098747.1	82.353	68	12	0	2	69	773	706	1.61e-12	69.8	NC_026146.1_-_XP_011098747.1	76	56	56	0	82.35	1	-1	GCAGAGAATTTATTCTTCATTTCCTCAACGGTGGCAGTCTCCCACTGAGGGACCCTTCCTTGTGGATC	GCAGAGAACTTATTCTTCATCTCCAGAACACTAGATTTGTCCCACTGAGGGACCCTTCCTTCTGGATC	69	1041	NC_026146.1_-_XP_011098747.1 Sesamum indicum cultivar Zhongzhi No. 13 linkage group LG2, S_indicum_v1.0, whole genome shotgun sequence	thylakoid lumenal 29 kDa protein, chloroplastic
	2766	NC_026145.1 - XP_011069870.1	83.607	61	10	0	7	67	159	99	1.96e-11	66.2	NC_026145.1_-_XP_011069870.1	72	51	51	0	83.61	1	-1	GACAACAAATGCAGCACTGACCCGAGATCTTTTGCGAGGCAAACAGTAGAGATCCACAAGG	GACAACAAATGGAGCACTGATGCGAGACCTTTTGCGAGGCAGAAAATACACATCCACATGG	69	2001	NC_026145.1_-_XP_011069870.1 Sesamum indicum cultivar Zhongzhi No. 13 linkage group LG1, S_indicum_v1.0, whole genome shotgun sequence	EIN3-binding F-box protein 1
	2769	NC_026151.1 - XP_011085012.1	88.406	69	8	0	1	69	75	7	1.72e-18	89.7	NC_026151.1_-_XP_011085012.1	98	61	61	0	88.41	1	-1	TGCAGAGACACACTGTGCGATCCTTAGTATCAGCCCACTTTTTCTCCCTGGACTCCCAAACAGCTCCTT	TGCAAAAACACACTGTCCAATTCTTAATATCAGCCCACTCTTTCTCCCTGGACTCCCAAACAACTCCTT	69	468	NC_026151.1_-_XP_011085012.1 Sesamum indicum cultivar Zhongzhi No. 13 linkage group LG7, S_indicum_v1.0, whole genome shotgun sequence	CASP-like protein 5B1
	2769	NC_026148.1 - XP_011076785.1	85.507	69	10	0	1	69	72	4	8.92e-16	80.6	NC_026148.1_-_XP_011076785.1	88	59	59	0	85.51	1	-1	TGCAGAGACACACTGTGCGATCCTTAGTATCAGCCCACTTTTTCTCCCTGGACTCCCAAACAGCTCCTT	TGCAAACACACACTGTCCTATCCTTAATATCAGCCCACTCTTTTTACCTGGACTTCCAAACACCTCCTT	69	465	NC_026148.1_-_XP_011076785.1 Sesamum indicum cultivar Zhongzhi No. 13 linkage group LG4, S_indicum_v1.0, whole genome shotgun sequence	CASP-like protein 5B1
	2771	NC_026150.1 - XP_011080928.1	92.754	69	5	0	1	69	951	883	2.73e-22	103	NC_026150.1_-_XP_011080928.1	113	64	64	0	92.75	1	-1	TGCAGAGACACCAACTAAAGACTTTCCCGCACCACAAGGTAGCACAATAATACCAGATCGAGCTCTGCC	TGCAGAAACACCAACTAAAGACTTTCCTGCACCACAAGGTAGCACAATGATACCCGATCGTGCTCTGCC	69	2301	NC_026150.1_-_XP_011080928.1 Sesamum indicum cultivar Zhongzhi No. 13 linkage group LG6, S_indicum_v1.0, whole genome shotgun sequence	DNA repair helicase XPB1
	2771	NC_026145.1 - XP_011073070.1	85.507	69	10	0	1	69	945	877	8.92e-16	80.6	NC_026145.1_-_XP_011073070.1	88	59	59	0	85.51	1	-1	TGCAGAGACACCAACTAAAGACTTTCCCGCACCACAAGGTAGCACAATAATACCAGATCGAGCTCTGCC	TGCAGAAACGCCAACCAAAGACTTTCCGGCACCACATGGTAGCACAATGATTCCAGAACGTGCTCTCCC	69	2295	NC_026145.1_-_XP_011073070.1 Sesamum indicum cultivar Zhongzhi No. 13 linkage group LG1, S_indicum_v1.0, whole genome shotgun sequence	DNA repair helicase XPB1
	2783	NC_026152.1 - XP_011087881.1	86.765	68	9	0	1	68	621	688	2.56e-16	83.3	NC_026152.1_-_XP_011087881.1	91	59	59	0	86.76	1	1	TGCAGAGACCAAAGATCTGTTTGACAAGCTAACTGAAGATGCTATGAAGTTGATGGAGAATGGAGATT	TGCTGAAACTAAACAGCTGTTTGACCAACTAACTGAAGATGCCATGAAATTGATGGAGAATGGAGATT	69	1092	NC_026152.1_-_XP_011087881.1 Sesamum indicum cultivar Zhongzhi No. 13 linkage group LG8, S_indicum_v1.0, whole genome shotgun sequence	CD2 antigen cytoplasmic tail-binding protein 2
	2795	NC_026155.1 - XP_011093940.1	82.353	68	12	0	2	69	1159	1226	1.61e-12	69.8	NC_026155.1_-_XP_011093940.1	76	56	56	0	82.35	1	1	GCAGAGACGGAGATCATGACTAGCGTGCGTAAAGCTCGGTTCCGGTGCTGTATGAGTCAACCAATGAC	GCAGAGACTGAGATCATGACAACTGTCAGAAAGGCTCGTTTTCGTTGCTGCATGAGTCAACCAATGAC	69	1236	NC_026155.1_-_XP_011093940.1 Sesamum indicum cultivar Zhongzhi No. 13 linkage group LG11, S_indicum_v1.0, whole genome shotgun sequence	serine/threonine-protein kinase HT1
	2796	NC_026155.1 - XP_011093940.1	82.353	68	12	0	2	69	1159	1226	1.61e-12	69.8	NC_026155.1_-_XP_011093940.1	76	56	56	0	82.35	1	1	GCAGAGACGGAGATCATGACTAGCGTGCGTAAAGCTCGGTTCCGGTGCTGTATGAGTCAACCAATGAC	GCAGAGACTGAGATCATGACAACTGTCAGAAAGGCTCGTTTTCGTTGCTGCATGAGTCAACCAATGAC	69	1236	NC_026155.1_-_XP_011093940.1 Sesamum indicum cultivar Zhongzhi No. 13 linkage group LG11, S_indicum_v1.0, whole genome shotgun sequence	serine/threonine-protein kinase HT1
	2801	NC_026148.1 - XP_011076062.1	86.957	69	9	0	1	69	1635	1567	7.32e-17	85.1	NC_026148.1_-_XP_011076062.1	93	60	60	0	86.96	1	-1	TGCAGAGACTAACACAGGAGAAGACCAGAAGAGGAAGGAGTTGTACGCTTTACGAAGCTGCACAGCTTT	TGCAGAGACTAATACAGGGGAAGACCAGAATAGGAATGAATTGTATGCTTTACGCAGTTGAACAGCTTT	69	4446	NC_026148.1_-_XP_011076062.1 Sesamum indicum cultivar Zhongzhi No. 13 linkage group LG4, S_indicum_v1.0, whole genome shotgun sequence	ABC transporter C family member 10
	2801	NC_026148.1 - XP_011076061.1	86.957	69	9	0	1	69	1635	1567	7.32e-17	85.1	NC_026148.1_-_XP_011076061.1	93	60	60	0	86.96	1	-1	TGCAGAGACTAACACAGGAGAAGACCAGAAGAGGAAGGAGTTGTACGCTTTACGAAGCTGCACAGCTTT	TGCAGAGACTAATACAGGGGAAGACCAGAATAGGAATGAATTGTATGCTTTACGCAGTTGAACAGCTTT	69	4446	NC_026148.1_-_XP_011076061.1 Sesamum indicum cultivar Zhongzhi No. 13 linkage group LG4, S_indicum_v1.0, whole genome shotgun sequence	ABC transporter C family member 10
	2802	NC_026148.1 - XP_011076062.1	86.957	69	9	0	1	69	1635	1567	7.32e-17	85.1	NC_026148.1_-_XP_011076062.1	93	60	60	0	86.96	1	-1	TGCAGAGACTAATACAGGAGAAGCCCAGAAGAGGAAGGAGTTGTACGCTTTACGGAGCTGCACAGCTTT	TGCAGAGACTAATACAGGGGAAGACCAGAATAGGAATGAATTGTATGCTTTACGCAGTTGAACAGCTTT	69	4446	NC_026148.1_-_XP_011076062.1 Sesamum indicum cultivar Zhongzhi No. 13 linkage group LG4, S_indicum_v1.0, whole genome shotgun sequence	ABC transporter C family member 10
	2802	NC_026148.1 - XP_011076061.1	86.957	69	9	0	1	69	1635	1567	7.32e-17	85.1	NC_026148.1_-_XP_011076061.1	93	60	60	0	86.96	1	-1	TGCAGAGACTAATACAGGAGAAGCCCAGAAGAGGAAGGAGTTGTACGCTTTACGGAGCTGCACAGCTTT	TGCAGAGACTAATACAGGGGAAGACCAGAATAGGAATGAATTGTATGCTTTACGCAGTTGAACAGCTTT	69	4446	NC_026148.1_-_XP_011076061.1 Sesamum indicum cultivar Zhongzhi No. 13 linkage group LG4, S_indicum_v1.0, whole genome shotgun sequence	ABC transporter C family member 10
	2814	NC_026146.1 - XP_011097374.1	86.364	66	9	0	4	69	2052	1987	3.11e-15	79.7	NC_026146.1_-_XP_011097374.1	87	57	57	0	86.36	1	-1	AGAGACTTCGAAGTTCCTCTTCCCGCTCACAATCTCAAGCAACACCATTCCATAACTGTAGATATC	AGAAACTTCGAAGTTCCTCTTTCCACTTACTATCTCCAACAACACCATTCCATAACTGTACACATC	69	2373	NC_026146.1_-_XP_011097374.1 Sesamum indicum cultivar Zhongzhi No. 13 linkage group LG2, S_indicum_v1.0, whole genome shotgun sequence	G-type lectin S-receptor-like serine/threonine-protein kinase At1g34300
	2814	NC_026146.1 - XP_011097360.2	84.058	69	11	0	1	69	2352	2284	3.79e-14	76.1	NC_026146.1_-_XP_011097360.2	83	58	58	0	84.06	1	-1	TGCAGAGACTTCGAAGTTCCTCTTCCCGCTCACAATCTCAAGCAACACCATTCCATAACTGTAGATATC	TGCTGAGACTTCAAAATTCCTCCTTCCACTCACAATCTCCAACAACACCATTCCATAACTATACACATC	69	2781	NC_026146.1_-_XP_011097360.2 Sesamum indicum cultivar Zhongzhi No. 13 linkage group LG2, S_indicum_v1.0, whole genome shotgun sequence	G-type lectin S-receptor-like serine/threonine-protein kinase At1g34300
	2816	NC_026152.1 - XP_011088600.1	86.885	61	8	0	9	69	1189	1129	3.79e-14	75.2	NC_026152.1_-_XP_011088600.1	82	53	53	0	86.89	1	-1	CTTGTGCTACAACACCGTGGTTGCAGAGTTCATCAAGCTTCTCAGGTGAATAAGCAAATGC	CTTGTGTGACAAGACCATGGTTGCAGAGGTCATCAAGCTTCTCAGGCGATGAAGCAAATGC	69	5673	NC_026152.1_-_XP_011088600.1 Sesamum indicum cultivar Zhongzhi No. 13 linkage group LG8, S_indicum_v1.0, whole genome shotgun sequence	E3 ubiquitin-protein ligase UPL3
	2816	NC_026152.1 - XP_020551545.1	86.885	61	8	0	9	69	1189	1129	3.79e-14	75.2	NC_026152.1_-_XP_020551545.1	82	53	53	0	86.89	1	-1	CTTGTGCTACAACACCGTGGTTGCAGAGTTCATCAAGCTTCTCAGGTGAATAAGCAAATGC	CTTGTGTGACAAGACCATGGTTGCAGAGGTCATCAAGCTTCTCAGGCGATGAAGCAAATGC	69	5673	NC_026152.1_-_XP_020551545.1 Sesamum indicum cultivar Zhongzhi No. 13 linkage group LG8, S_indicum_v1.0, whole genome shotgun sequence	E3 ubiquitin-protein ligase UPL3
	2845	NC_026153.1 - XP_011090446.1	91.045	67	6	0	3	69	553	619	4.05e-20	95.1	NC_026153.1_-_XP_011090446.1	104	61	61	0	91.04	1	1	CAGAGAGATGATGGAGATGAAGAACTATGCAGTGTGTTTGTCCCAACAAACCACTTGTACATTGGTG	CAGAGAGACGATGGAGATGAAGAACTCTGCAGCGTTTTTGTCCCAACAAACCACTTATATATTGGTG	69	792	NC_026153.1_-_XP_011090446.1 Sesamum indicum cultivar Zhongzhi No. 13 linkage group LG9, S_indicum_v1.0, whole genome shotgun sequence	protein LIKE COV 2
	2846	NC_026153.1 - XP_011090446.1	91.045	67	6	0	3	69	553	619	4.05e-20	95.1	NC_026153.1_-_XP_011090446.1	104	61	61	0	91.04	1	1	CAGAGAGATGATGGAGATGAAGAACTATGCAGTGTGTTTGTCCCAACAAACCACTTGTACATTGGTG	CAGAGAGACGATGGAGATGAAGAACTCTGCAGCGTTTTTGTCCCAACAAACCACTTATATATTGGTG	69	792	NC_026153.1_-_XP_011090446.1 Sesamum indicum cultivar Zhongzhi No. 13 linkage group LG9, S_indicum_v1.0, whole genome shotgun sequence	protein LIKE COV 2
	2858	NC_026156.1 - XP_020553830.1	86.885	61	8	0	8	68	282	342	3.79e-14	75.2	NC_026156.1_-_XP_020553830.1	82	53	53	0	86.89	1	1	AGCGGCCGCAAAAACTCTCGACGCCATGGAGAGCGCGTTGCTCTCACGCGAGCGCCACCAC	AGCGGCTGCCCAAGCGCTCGACGCGATGGAGAGCGCGTTGGTCTCACGCGAGCGCCAACAC	69	1812	NC_026156.1_-_XP_020553830.1 Sesamum indicum cultivar Zhongzhi No. 13 linkage group LG12, S_indicum_v1.0, whole genome shotgun sequence	probable 9-cis-epoxycarotenoid dioxygenase NCED5, chloroplastic
	2864	NC_026148.1 - XP_020548861.1	85.714	56	8	0	2	57	512	457	1.96e-11	66.2	NC_026148.1_-_XP_020548861.1	72	48	48	0	85.71	1	-1	GCAGAGAGCTCATCTTGTGTCATTTGCCTAACTATTCTCATCTGCTGGTTTTTCCT	GCGGAGAGTTCTTCTTGTGTCATTTGACGGACCATTTTCATCTGCTGGTTTTTCCT	69	1116	NC_026148.1_-_XP_020548861.1 Sesamum indicum cultivar Zhongzhi No. 13 linkage group LG4, S_indicum_v1.0, whole genome shotgun sequence	probable WRKY transcription factor 27 isoform X2
	2864	NC_026148.1 - XP_011076091.1	85.714	56	8	0	2	57	512	457	1.96e-11	66.2	NC_026148.1_-_XP_011076091.1	72	48	48	0	85.71	1	-1	GCAGAGAGCTCATCTTGTGTCATTTGCCTAACTATTCTCATCTGCTGGTTTTTCCT	GCGGAGAGTTCTTCTTGTGTCATTTGACGGACCATTTTCATCTGCTGGTTTTTCCT	69	1011	NC_026148.1_-_XP_011076091.1 Sesamum indicum cultivar Zhongzhi No. 13 linkage group LG4, S_indicum_v1.0, whole genome shotgun sequence	probable WRKY transcription factor 27 isoform X2
	2868	NC_026148.1 - XP_020548861.1	85.714	56	8	0	2	57	512	457	1.96e-11	66.2	NC_026148.1_-_XP_020548861.1	72	48	48	0	85.71	1	-1	GCAGAGAGCTCTTCTTGTGTCATTTGCCTTACGAGTTTCGTCTGCTGGTTTTTCCT	GCGGAGAGTTCTTCTTGTGTCATTTGACGGACCATTTTCATCTGCTGGTTTTTCCT	69	1116	NC_026148.1_-_XP_020548861.1 Sesamum indicum cultivar Zhongzhi No. 13 linkage group LG4, S_indicum_v1.0, whole genome shotgun sequence	probable WRKY transcription factor 27 isoform X2
	2868	NC_026148.1 - XP_011076091.1	85.714	56	8	0	2	57	512	457	1.96e-11	66.2	NC_026148.1_-_XP_011076091.1	72	48	48	0	85.71	1	-1	GCAGAGAGCTCTTCTTGTGTCATTTGCCTTACGAGTTTCGTCTGCTGGTTTTTCCT	GCGGAGAGTTCTTCTTGTGTCATTTGACGGACCATTTTCATCTGCTGGTTTTTCCT	69	1011	NC_026148.1_-_XP_011076091.1 Sesamum indicum cultivar Zhongzhi No. 13 linkage group LG4, S_indicum_v1.0, whole genome shotgun sequence	probable WRKY transcription factor 27 isoform X2
	2869	NC_026154.1 - XP_011091770.1	81.159	69	13	0	1	69	435	503	1.96e-11	67.1	NC_026154.1_-_XP_011091770.1	73	56	56	0	81.16	1	1	TGCAGAGAGCTGCAAACAGTTGGATGAATATCGGCTTCCTGATAGATCACCCCTAATTGATTTTGATTT	TGCAGAGAGGTGCAAGGGGTTGGATGAATATTATCTGCCTGATAAAGCACCACTAATCGACTTTGATTT	69	1299	NC_026154.1_-_XP_011091770.1 Sesamum indicum cultivar Zhongzhi No. 13 linkage group LG10, S_indicum_v1.0, whole genome shotgun sequence	F-box/WD-40 repeat-containing protein At3g52030
	2870	NC_026150.1 - XP_020550113.1	86.957	69	9	0	1	69	2760	2828	7.32e-17	85.1	NC_026150.1_-_XP_020550113.1	93	60	60	0	86.96	1	1	TGCAGAGAGCTTAGACACCCGAGGTGTCTACGTCTTTGATGATGGTTTCCGGTTTGTCATATGGTTTGG	TGCACAGAGCTTAGATACCAGAGGTCTCTATATCCTTGACGATGGTTTCAGGTTTGTCATATGGTTTGG	69	3129	NC_026150.1_-_XP_020550113.1 Sesamum indicum cultivar Zhongzhi No. 13 linkage group LG6, S_indicum_v1.0, whole genome shotgun sequence	protein transport protein Sec24-like At3g07100
	2870	NC_026150.1 - XP_011082588.1	85.507	69	10	0	1	69	2778	2846	8.92e-16	80.6	NC_026150.1_-_XP_011082588.1	88	59	59	0	85.51	1	1	TGCAGAGAGCTTAGACACCCGAGGTGTCTACGTCTTTGATGATGGTTTCCGGTTTGTCATATGGTTTGG	TGCAGATTGCTTAGATACCAGAGGTCTTTATATCTTTGATGATGGTTTCCGGTTTATTATATGGTTTGG	69	3147	NC_026150.1_-_XP_011082588.1 Sesamum indicum cultivar Zhongzhi No. 13 linkage group LG6, S_indicum_v1.0, whole genome shotgun sequence	protein transport protein Sec24-like At3g07100
	2875	NC_026145.1 - XP_011090274.1	94.203	69	4	0	1	69	662	730	6.42e-24	107	NC_026145.1_-_XP_011090274.1	118	65	65	0	94.2	1	1	TGCAGAGAGGAAATCCTCGTTTTTCTCAACTGAGTAGTACCATGTTTGGACTTTTCTATTGCGGTTACC	TGCAGAGAGGAAATCCTCGTTTTTCTCAACTTAGTAGTACCATGTTTGGACTGTTTTATTGTGGTTACC	69	1251	NC_026145.1_-_XP_011090274.1 Sesamum indicum cultivar Zhongzhi No. 13 linkage group LG1, S_indicum_v1.0, whole genome shotgun sequence	phosphatidate cytidylyltransferase 5, chloroplastic
	2878	NC_026150.1 - XP_011081994.1	89.796	49	5	0	1	49	738	690	1.96e-11	67.1	NC_026150.1_-_XP_011081994.1	73	44	44	0	89.8	1	-1	TGCAGAGAGGAGACCAAAAATGTCTCCAGTGATAGAATGCTTTCTAGTC	TGCAGAGAGCAGACCAAAAATGTCTCCGGTGATGGAATGCCTTCTTGTC	69	1176	NC_026150.1_-_XP_011081994.1 Sesamum indicum cultivar Zhongzhi No. 13 linkage group LG6, S_indicum_v1.0, whole genome shotgun sequence	uncharacterized vacuolar membrane protein YML018C isoform X2
	2904	NC_026152.1 - XP_011085696.1	83.582	67	11	0	1	67	1466	1532	4.62e-13	72.5	NC_026152.1_-_XP_011085696.1	79	56	56	0	83.58	1	1	TGCAGAGAGTTCAGGGGCCGCAGCTGCTGTTCCTCGATCTCTGCGCTGCGTTTCTTGCTCAGCTTCG	TGCAGAGAGTTCAGGGGCCACAGTTCCTTTTTCTTGATCTTTGTGCCGCCTTCCTTGCTCAGCTTCG	69	1542	NC_026152.1_-_XP_011085696.1 Sesamum indicum cultivar Zhongzhi No. 13 linkage group LG8, S_indicum_v1.0, whole genome shotgun sequence	SNF1-related protein kinase catalytic subunit alpha KIN10
	2904	NC_026152.1 - XP_011085697.1	83.582	67	11	0	1	67	1466	1532	4.62e-13	72.5	NC_026152.1_-_XP_011085697.1	79	56	56	0	83.58	1	1	TGCAGAGAGTTCAGGGGCCGCAGCTGCTGTTCCTCGATCTCTGCGCTGCGTTTCTTGCTCAGCTTCG	TGCAGAGAGTTCAGGGGCCACAGTTCCTTTTTCTTGATCTTTGTGCCGCCTTCCTTGCTCAGCTTCG	69	1542	NC_026152.1_-_XP_011085697.1 Sesamum indicum cultivar Zhongzhi No. 13 linkage group LG8, S_indicum_v1.0, whole genome shotgun sequence	SNF1-related protein kinase catalytic subunit alpha KIN10
	2910	NC_026149.1 - XP_020549580.1	85.507	69	10	0	1	69	1123	1191	8.92e-16	80.6	NC_026149.1_-_XP_020549580.1	88	59	59	0	85.51	1	1	TGCAGAGATAAGAAGAATGACATGAATATTTTTGCTCACAATTACATGCAAAAGATTGCATATATACAG	TGCATGGAAAAGAAGAACGAGATGAATATGTTTGTGCACAATTATATGCAAAAGATTGCATATATTCAG	69	3417	NC_026149.1_-_XP_020549580.1 Sesamum indicum cultivar Zhongzhi No. 13 linkage group LG5, S_indicum_v1.0, whole genome shotgun sequence	autophagy-related protein 11
	2910	NC_026149.1 - XP_011079365.1	85.507	69	10	0	1	69	1123	1191	8.92e-16	80.6	NC_026149.1_-_XP_011079365.1	88	59	59	0	85.51	1	1	TGCAGAGATAAGAAGAATGACATGAATATTTTTGCTCACAATTACATGCAAAAGATTGCATATATACAG	TGCATGGAAAAGAAGAACGAGATGAATATGTTTGTGCACAATTATATGCAAAAGATTGCATATATTCAG	69	3417	NC_026149.1_-_XP_011079365.1 Sesamum indicum cultivar Zhongzhi No. 13 linkage group LG5, S_indicum_v1.0, whole genome shotgun sequence	autophagy-related protein 11
	2927	NC_026150.1 - XP_011082328.1	81.159	69	13	0	1	69	1119	1187	1.96e-11	67.1	NC_026150.1_-_XP_011082328.1	73	56	56	0	81.16	1	1	TGCAGAGATATTGTCCTCTGTCATCCTCTCCACTGTTTTTTCTTTGTACTCCACGGCTTTCATTGGGCG	TGCAGAGATATTCACCTCTGTTATCCTGTCCACTCTGTTCTCTTTGTATTCAACCGCCCTCATTGGACG	69	1560	NC_026150.1_-_XP_011082328.1 Sesamum indicum cultivar Zhongzhi No. 13 linkage group LG6, S_indicum_v1.0, whole genome shotgun sequence	plastidal glycolate/glycerate translocator 1, chloroplastic
	2943	NC_026154.1 - XP_020552758.1	86.441	59	8	0	1	59	932	874	4.62e-13	71.6	NC_026154.1_-_XP_020552758.1	78	51	51	0	86.44	1	-1	TGCAGAGATGAAAACCATGGAGGAACATTTGTTGCATCAAATGAGTTGTTACTCATGTC	TGCAAAGATGAAAACCATGGGGGAAAATCCGTTGCATCAAATGAATTATTGCTCATGTC	69	2832	NC_026154.1_-_XP_020552758.1 Sesamum indicum cultivar Zhongzhi No. 13 linkage group LG10, S_indicum_v1.0, whole genome shotgun sequence	probable leucine-rich repeat receptor-like protein kinase At5g49770
	2943	NC_026154.1 - XP_011092237.1	86.441	59	8	0	1	59	932	874	4.62e-13	71.6	NC_026154.1_-_XP_011092237.1	78	51	51	0	86.44	1	-1	TGCAGAGATGAAAACCATGGAGGAACATTTGTTGCATCAAATGAGTTGTTACTCATGTC	TGCAAAGATGAAAACCATGGGGGAAAATCCGTTGCATCAAATGAATTATTGCTCATGTC	69	2832	NC_026154.1_-_XP_011092237.1 Sesamum indicum cultivar Zhongzhi No. 13 linkage group LG10, S_indicum_v1.0, whole genome shotgun sequence	probable leucine-rich repeat receptor-like protein kinase At5g49770
	2954	NC_026150.1 - XP_011081312.1	81.944	72	10	1	1	69	1488	1559	1.61e-12	70.7	NC_026150.1_-_XP_011081312.1	77	59	59	3	81.94	1	1	TGCAGAGATGCCGTGGAGGGCC---CCAGACATTGCACCTGAGAATTACATGATGAATATGGGCCCTTCCGC	TGCAGAGATGCAGTGGAGAACTGGGCAAGACCTTGCACCTGAGAATTACATGATGCCTATGGGACCTTCTGC	69	2619	NC_026150.1_-_XP_011081312.1 Sesamum indicum cultivar Zhongzhi No. 13 linkage group LG6, S_indicum_v1.0, whole genome shotgun sequence	E3 ubiquitin ligase PARAQUAT TOLERANCE 3
	2955	NC_026156.1 - XP_020554124.1	87.879	66	8	0	1	66	603	668	7.32e-17	84.2	NC_026156.1_-_XP_020554124.1	92	58	58	0	87.88	1	1	TGCAGAGATGCCTGATTTTTACGCTGATGGTGAGTATGATCTGAGCGGTTTTGCTGTTGGCATCGT	TGCGGAGATGCCTGATTTTTATGCAGATGGGGAGTATGATCTCAGTGGTTTTGCTGTGGGTATCGT	69	1206	NC_026156.1_-_XP_020554124.1 Sesamum indicum cultivar Zhongzhi No. 13 linkage group LG12, S_indicum_v1.0, whole genome shotgun sequence	phosphoribosylformylglycinamidine cyclo-ligase, chloroplastic
	2955	NC_026156.1 - XP_011096656.1	87.879	66	8	0	1	66	603	668	7.32e-17	84.2	NC_026156.1_-_XP_011096656.1	92	58	58	0	87.88	1	1	TGCAGAGATGCCTGATTTTTACGCTGATGGTGAGTATGATCTGAGCGGTTTTGCTGTTGGCATCGT	TGCGGAGATGCCTGATTTTTATGCAGATGGGGAGTATGATCTCAGTGGTTTTGCTGTGGGTATCGT	69	1206	NC_026156.1_-_XP_011096656.1 Sesamum indicum cultivar Zhongzhi No. 13 linkage group LG12, S_indicum_v1.0, whole genome shotgun sequence	phosphoribosylformylglycinamidine cyclo-ligase, chloroplastic
	2968	NC_026146.1 - XP_011097057.1	94.203	69	4	0	1	69	973	1041	6.42e-24	107	NC_026146.1_-_XP_011097057.1	118	65	65	0	94.2	1	1	TGCAGAGATGGCAACAGCTTTACATATAACAGCCATATCAACATTGCCGTAGCAGTAGCAATAGATGGT	TGCAGAGATGGCAAGAGCTTTACATATAACAGTCATATCAACATTGCAGTAGCAGTAGCCATAGATGGT	69	1425	NC_026146.1_-_XP_011097057.1 Sesamum indicum cultivar Zhongzhi No. 13 linkage group LG2, S_indicum_v1.0, whole genome shotgun sequence	dihydrolipoyllysine-residue acetyltransferase component 5 of pyruvate dehydrogenase complex, chloroplastic
	2969	NC_026146.1 - XP_011071072.1	92.188	64	5	0	1	64	402	465	1.41e-19	94.2	NC_026146.1_-_XP_011071072.1	103	59	59	0	92.19	1	1	TGCAGAGATGGCTCGTGATCTTGCTCCAGATGTTGAAAGATTACTTCAATTCAGAGACCCTAAT	TGCAGAAATGGCTCGTGATCTTGCTCCAGAAGTCGAAAGATTACTTCAATTTAGAGATCCTAAT	69	2625	NC_026146.1_-_XP_011071072.1 Sesamum indicum cultivar Zhongzhi No. 13 linkage group LG2, S_indicum_v1.0, whole genome shotgun sequence	AP-1 complex subunit gamma-2
	2969	NC_026152.1 - XP_011086531.1	92.188	64	5	0	1	64	402	465	1.41e-19	94.2	NC_026152.1_-_XP_011086531.1	103	59	59	0	92.19	1	1	TGCAGAGATGGCTCGTGATCTTGCTCCAGATGTTGAAAGATTACTTCAATTCAGAGACCCTAAT	TGCAGAAATGGCTCGTGATCTTGCTCCAGAAGTTGAAAGATTACTTCAATTTAGGGATCCTAAT	69	2634	NC_026152.1_-_XP_011086531.1 Sesamum indicum cultivar Zhongzhi No. 13 linkage group LG8, S_indicum_v1.0, whole genome shotgun sequence	AP-1 complex subunit gamma-2 isoform X2
	2979	NC_026149.1 - XP_011078787.1	92.754	69	5	0	1	69	834	766	2.73e-22	103	NC_026149.1_-_XP_011078787.1	113	64	64	0	92.75	1	-1	TGCAGAGATTACTGGAGCATAAGAGGAAAGCATGAAATGAATACGAGGGTAAGGCACAAGGTTTGTTTG	TGCTGAGATTACTGGTGCATAAGATGAAAGCATGAAATGGATACGAGGATAAGGCACAAGGTTTGTTTG	69	1356	NC_026149.1_-_XP_011078787.1 Sesamum indicum cultivar Zhongzhi No. 13 linkage group LG5, S_indicum_v1.0, whole genome shotgun sequence	tubulin alpha-1 chain
	2979	NC_026148.1 - XP_011075054.1	86.957	69	9	0	1	69	834	766	7.32e-17	85.1	NC_026148.1_-_XP_011075054.1	93	60	60	0	86.96	1	-1	TGCAGAGATTACTGGAGCATAAGAGGAAAGCATGAAATGAATACGAGGGTAAGGCACAAGGTTTGTTTG	TGCTGAGATAACGGGTGCATAAGATGAAAGCATGAAATGGATGCGAGGATAAGGTACAAGGTTTGTTTG	69	1350	NC_026148.1_-_XP_011075054.1 Sesamum indicum cultivar Zhongzhi No. 13 linkage group LG4, S_indicum_v1.0, whole genome shotgun sequence	tubulin alpha-3 chain
	2981	NC_026152.1 - XP_011085906.1	83.824	68	11	0	2	69	145	212	1.32e-13	74.3	NC_026152.1_-_XP_011085906.1	81	57	57	0	83.82	1	1	GCAGAGATTAGGGATTCGACGAGGCATGGGAGGAGAGTTTGGCTGGGAACATTCAATACGGCAGAAGA	GCAGAAATAAGGGATTCGACAAGGAACGGAAGGAGGGTTTGGCTTGGAACGTTCAACACGGAAGAAGA	69	501	NC_026152.1_-_XP_011085906.1 Sesamum indicum cultivar Zhongzhi No. 13 linkage group LG8, S_indicum_v1.0, whole genome shotgun sequence	ethylene-responsive transcription factor 1B-like
	2981	NC_026152.1 - XP_011085905.1	80.882	68	13	0	2	69	115	182	6.86e-11	65.3	NC_026152.1_-_XP_011085905.1	71	55	55	0	80.88	1	1	GCAGAGATTAGGGATTCGACGAGGCATGGGAGGAGAGTTTGGCTGGGAACATTCAATACGGCAGAAGA	GCGGAAATAAGGGATTCGACAAGGAACGGGAAGAGGGTTTGGCTTGGAACATTCAACACAGAGGAAGA	69	441	NC_026152.1_-_XP_011085905.1 Sesamum indicum cultivar Zhongzhi No. 13 linkage group LG8, S_indicum_v1.0, whole genome shotgun sequence	ethylene-responsive transcription factor 1B-like
	2982	NC_026152.1 - XP_011085906.1	83.824	68	11	0	2	69	145	212	1.32e-13	74.3	NC_026152.1_-_XP_011085906.1	81	57	57	0	83.82	1	1	GCAGAGATTAGGGATTCGACGAGGCATGGGAGGAGAGTTTGGCTGGGAACATTCAATACGGCAGAAGA	GCAGAAATAAGGGATTCGACAAGGAACGGAAGGAGGGTTTGGCTTGGAACGTTCAACACGGAAGAAGA	69	501	NC_026152.1_-_XP_011085906.1 Sesamum indicum cultivar Zhongzhi No. 13 linkage group LG8, S_indicum_v1.0, whole genome shotgun sequence	ethylene-responsive transcription factor 1B-like
	2982	NC_026152.1 - XP_011085905.1	80.882	68	13	0	2	69	115	182	6.86e-11	65.3	NC_026152.1_-_XP_011085905.1	71	55	55	0	80.88	1	1	GCAGAGATTAGGGATTCGACGAGGCATGGGAGGAGAGTTTGGCTGGGAACATTCAATACGGCAGAAGA	GCGGAAATAAGGGATTCGACAAGGAACGGGAAGAGGGTTTGGCTTGGAACATTCAACACAGAGGAAGA	69	441	NC_026152.1_-_XP_011085905.1 Sesamum indicum cultivar Zhongzhi No. 13 linkage group LG8, S_indicum_v1.0, whole genome shotgun sequence	ethylene-responsive transcription factor 1B-like
	2983	NC_026159.1 - XP_011098645.1	85.484	62	9	0	2	63	623	684	4.62e-13	72.5	NC_026159.1_-_XP_011098645.1	79	53	53	0	85.48	1	1	GCAGAGATTATACAAATCCTCATCTTCCTGTAAATCCCACTGCTATAGATGGTTTGCTTCAG	GCAGGGATTATACAAATCCATATCTTCCTGTTAATCCTACTGCAATGGAGGGTTTTCTTCAG	69	1422	NC_026159.1_-_XP_011098645.1 Sesamum indicum cultivar Zhongzhi No. 13 linkage group LG15, S_indicum_v1.0, whole genome shotgun sequence	polypyrimidine tract-binding protein homolog 1 isoform X2
	2983	NC_026159.1 - XP_011098646.1	85.484	62	9	0	2	63	623	684	4.62e-13	72.5	NC_026159.1_-_XP_011098646.1	79	53	53	0	85.48	1	1	GCAGAGATTATACAAATCCTCATCTTCCTGTAAATCCCACTGCTATAGATGGTTTGCTTCAG	GCAGGGATTATACAAATCCATATCTTCCTGTTAATCCTACTGCAATGGAGGGTTTTCTTCAG	69	948	NC_026159.1_-_XP_011098646.1 Sesamum indicum cultivar Zhongzhi No. 13 linkage group LG15, S_indicum_v1.0, whole genome shotgun sequence	polypyrimidine tract-binding protein homolog 1 isoform X2
	2993	NC_026152.1 - XP_011086778.1	81.159	69	13	0	1	69	420	488	1.96e-11	67.1	NC_026152.1_-_XP_011086778.1	73	56	56	0	81.16	1	1	TGCAGAGATTGCAGGGAGGACAGAGTATAGTGATTCCACAGCGGCAGTTTGTGTGAACGAGAATGACCT	TGCAGAGATAGCAGGTCGGACAGAGTATAATGATTCATCATCAGCTGTTTGGGTTAATGAGAATGATCT	69	1788	NC_026152.1_-_XP_011086778.1 Sesamum indicum cultivar Zhongzhi No. 13 linkage group LG8, S_indicum_v1.0, whole genome shotgun sequence	65-kDa microtubule-associated protein 8 isoform X3
	2993	NC_026152.1 - XP_020551884.1	81.159	69	13	0	1	69	420	488	1.96e-11	67.1	NC_026152.1_-_XP_020551884.1	73	56	56	0	81.16	1	1	TGCAGAGATTGCAGGGAGGACAGAGTATAGTGATTCCACAGCGGCAGTTTGTGTGAACGAGAATGACCT	TGCAGAGATAGCAGGTCGGACAGAGTATAATGATTCATCATCAGCTGTTTGGGTTAATGAGAATGATCT	69	1782	NC_026152.1_-_XP_020551884.1 Sesamum indicum cultivar Zhongzhi No. 13 linkage group LG8, S_indicum_v1.0, whole genome shotgun sequence	65-kDa microtubule-associated protein 8 isoform X3
	3001	NC_026149.1 - XP_011077501.1	84.375	64	10	0	1	64	162	225	4.62e-13	71.6	NC_026149.1_-_XP_011077501.1	78	54	54	0	84.38	1	1	TGCAGAGATTTTTCATGATCTGCACGAAGAAGTTATGGTTACTGCTGCCAGAGGGAACAGTTTA	TGCAGAAATTTTTCATGATCTACATGAAGAAGTGATGGCGACTGCTGCAAGAGGGCACGGCTTA	69	4569	NC_026149.1_-_XP_011077501.1 Sesamum indicum cultivar Zhongzhi No. 13 linkage group LG5, S_indicum_v1.0, whole genome shotgun sequence	protein SCAR2
	3013	NC_026151.1 - XP_011084868.1	90.741	54	5	0	1	54	178	125	3.79e-14	76.1	NC_026151.1_-_XP_011084868.1	83	49	49	0	90.74	1	-1	TGCAGAGCAAGGGTATGGTGTTGGCTTGAACCGGCGTGCAGAACTCGAAGCCGG	TGCAGAGCAAGGGTATGGTGGCGGCTTGAACAGGAGTGCAGAACTCGAACCCGG	69	1791	NC_026151.1_-_XP_011084868.1 Sesamum indicum cultivar Zhongzhi No. 13 linkage group LG7, S_indicum_v1.0, whole genome shotgun sequence	DEAD-box ATP-dependent RNA helicase 18
	3017	NC_026151.1 - XP_011085088.1	91.304	69	6	0	1	69	299	231	3.32e-21	98.7	NC_026151.1_-_XP_011085088.1	108	63	63	0	91.3	1	-1	TGCAGAGCAATGGATGAGCTTTTCATAGTGATAGCACGCCGCTGTTCCTCATCCAAATAATCCATGAAT	TGGAGGGCAATGGACGAGCTCTTCATAGTGATAGCACGCCGTTGTTCCTCATCCAAGTAATCCATGAAT	69	3162	NC_026151.1_-_XP_011085088.1 Sesamum indicum cultivar Zhongzhi No. 13 linkage group LG7, S_indicum_v1.0, whole genome shotgun sequence	elongation factor-like GTPase 1 isoform X2
	3017	NC_026151.1 - XP_011085089.1	91.304	69	6	0	1	69	299	231	3.32e-21	98.7	NC_026151.1_-_XP_011085089.1	108	63	63	0	91.3	1	-1	TGCAGAGCAATGGATGAGCTTTTCATAGTGATAGCACGCCGCTGTTCCTCATCCAAATAATCCATGAAT	TGGAGGGCAATGGACGAGCTCTTCATAGTGATAGCACGCCGTTGTTCCTCATCCAAGTAATCCATGAAT	69	3162	NC_026151.1_-_XP_011085089.1 Sesamum indicum cultivar Zhongzhi No. 13 linkage group LG7, S_indicum_v1.0, whole genome shotgun sequence	elongation factor-like GTPase 1 isoform X2
	3018	NC_026145.1 - XP_011082002.1	87.037	54	7	0	6	59	535	588	1.96e-11	67.1	NC_026145.1_-_XP_011082002.1	73	47	47	0	87.04	1	1	AGCAATGGGATTGAGTATGAGTACTCGGAGGTGTCGAAATTCGCCATTTTTCGG	AGCAATGGGATCGAGTATGAGTATTCCGAGGTATCTAAGTTCGCCATATTTCGG	69	609	NC_026145.1_-_XP_011082002.1 Sesamum indicum cultivar Zhongzhi No. 13 linkage group LG1, S_indicum_v1.0, whole genome shotgun sequence	triphosphate tunel metalloenzyme 3-like
	3030	NC_026145.1 - XP_011086747.1	92	50	4	0	6	55	2784	2735	1.32e-13	73.4	NC_026145.1_-_XP_011086747.1	80	46	46	0	92	1	-1	AGCACTCTGCAATTTGGCTATCTCTTGCCCCTTAGCTTCTTCAATATCCA	AGCATTCTGCAGTTTTGCTATCTCTTGCCCCTTTGCTTCTTCAATATCCA	69	4704	NC_026145.1_-_XP_011086747.1 Sesamum indicum cultivar Zhongzhi No. 13 linkage group LG1, S_indicum_v1.0, whole genome shotgun sequence	myosin-12 isoform X2
	3030	NC_026145.1 - XP_020553440.1	92	50	4	0	6	55	2157	2108	1.32e-13	73.4	NC_026145.1_-_XP_020553440.1	80	46	46	0	92	1	-1	AGCACTCTGCAATTTGGCTATCTCTTGCCCCTTAGCTTCTTCAATATCCA	AGCATTCTGCAGTTTTGCTATCTCTTGCCCCTTTGCTTCTTCAATATCCA	69	4077	NC_026145.1_-_XP_020553440.1 Sesamum indicum cultivar Zhongzhi No. 13 linkage group LG1, S_indicum_v1.0, whole genome shotgun sequence	myosin-12 isoform X2
	3036	NC_026149.1 - XP_011079400.1	93.878	49	2	1	1	48	306	354	4.62e-13	72.5	NC_026149.1_-_XP_011079400.1	79	46	46	1	93.88	1	1	TGCAG-AGCAGAGTTTGATGGTTACTGTGAAGGAGAGCTCATAAAGGTA	TGCAGTAGCAGAGTTCGATGGTTACTGTGAAGGAGAGCTCATTAAGGTA	69	558	NC_026149.1_-_XP_011079400.1 Sesamum indicum cultivar Zhongzhi No. 13 linkage group LG5, S_indicum_v1.0, whole genome shotgun sequence	nucleoid-associated protein At4g30620, chloroplastic
	3037	NC_026147.1 - XP_011074632.1	88.06	67	8	0	1	67	1405	1339	2.1e-17	86	NC_026147.1_-_XP_011074632.1	94	59	59	0	88.06	1	-1	TGCAGAGCAGATTCCCAGTGCCAGCATAGAATATGGCATCAGTAGCAATAGGTAGGACACTCTTTTT	TGCAGAGCAGATTTCCAGTACCAGCATAGAATATAGCATCAGTGGCAATGGGCAGAAGACTCTTTTT	69	3657	NC_026147.1_-_XP_011074632.1 Sesamum indicum cultivar Zhongzhi No. 13 linkage group LG3, S_indicum_v1.0, whole genome shotgun sequence	coatomer subunit alpha-1-like
	3039	NC_026147.1 - XP_011074632.1	88.06	67	8	0	1	67	1405	1339	2.1e-17	86	NC_026147.1_-_XP_011074632.1	94	59	59	0	88.06	1	-1	TGCAGAGCAGATTTCCAGTGCCAGCATAGAATATGGCATCAGTTGCAATAGGTAGACCACTCTTCTT	TGCAGAGCAGATTTCCAGTACCAGCATAGAATATAGCATCAGTGGCAATGGGCAGAAGACTCTTTTT	69	3657	NC_026147.1_-_XP_011074632.1 Sesamum indicum cultivar Zhongzhi No. 13 linkage group LG3, S_indicum_v1.0, whole genome shotgun sequence	coatomer subunit alpha-1-like
	3039	NC_026151.1 - XP_020551078.1	83.582	67	11	0	1	67	1405	1339	4.62e-13	72.5	NC_026151.1_-_XP_020551078.1	79	56	56	0	83.58	1	-1	TGCAGAGCAGATTTCCAGTGCCAGCATAGAATATGGCATCAGTTGCAATAGGTAGACCACTCTTCTT	TGCATAGCAAATTTCCGGTGCCCGCATAGAATATAGCATCAGTACCAATGGGTAAAGAACTCTTCTT	69	3630	NC_026151.1_-_XP_020551078.1 Sesamum indicum cultivar Zhongzhi No. 13 linkage group LG7, S_indicum_v1.0, whole genome shotgun sequence	LOW QUALITY PROTEIN: coatomer subunit alpha-1-like
	3044	NC_026150.1 - XP_011080339.1	94.03	67	4	0	1	67	549	615	7.82e-23	104	NC_026150.1_-_XP_011080339.1	114	63	63	0	94.03	1	1	TGCAGAGCAGCAGGTATTGAGTGGAGCTGGAGTTATAAAAAGGCTTGTAGGTCTTCTTGGAGGTTCT	TGCAGAGCAGCAGGCATTGAGTGAAGCTGGAGTTATAAAGAGGCTTGTTGGTCTTCTTGGAGGTTCT	69	2028	NC_026150.1_-_XP_011080339.1 Sesamum indicum cultivar Zhongzhi No. 13 linkage group LG6, S_indicum_v1.0, whole genome shotgun sequence	armadillo repeat-containing protein 8 isoform X2
	3044	NC_026150.1 - XP_020550443.1	94.03	67	4	0	1	67	549	615	7.82e-23	104	NC_026150.1_-_XP_020550443.1	114	63	63	0	94.03	1	1	TGCAGAGCAGCAGGTATTGAGTGGAGCTGGAGTTATAAAAAGGCTTGTAGGTCTTCTTGGAGGTTCT	TGCAGAGCAGCAGGCATTGAGTGAAGCTGGAGTTATAAAGAGGCTTGTTGGTCTTCTTGGAGGTTCT	69	2028	NC_026150.1_-_XP_020550443.1 Sesamum indicum cultivar Zhongzhi No. 13 linkage group LG6, S_indicum_v1.0, whole genome shotgun sequence	armadillo repeat-containing protein 8 isoform X2
	3045	NC_026151.1 - XP_011083792.1	88.462	52	6	0	2	53	109	160	5.63e-12	68	NC_026151.1_-_XP_011083792.1	74	46	46	0	88.46	1	1	GCAGAGCAGCTCCTCCAGCTACATTACTGCATCCACTCCAACCCTTCTTGGG	GCGGAACAGCTGCTTCAGCTCCACTACTGCATCCACTCCAACCCTTCTTGGG	69	1650	NC_026151.1_-_XP_011083792.1 Sesamum indicum cultivar Zhongzhi No. 13 linkage group LG7, S_indicum_v1.0, whole genome shotgun sequence	nucleobase-ascorbate transporter 3
	3046	NC_026148.1 - XP_011076583.1	84.058	69	11	0	1	69	557	489	3.79e-14	76.1	NC_026148.1_-_XP_011076583.1	83	58	58	0	84.06	1	-1	TGCAGAGCAGCTCTAGCATCTGTCGTGGCGACAATGTTTTCTGGCAGCTTGTGTGCCGGAAAATACTTA	TGTAGAGCAGCTTTAGCATCTGTAGTTGCAATGACATTTTCTGGAAGCTTGTGTGCTGGAAAATACTTA	69	1347	NC_026148.1_-_XP_011076583.1 Sesamum indicum cultivar Zhongzhi No. 13 linkage group LG4, S_indicum_v1.0, whole genome shotgun sequence	glycerol-3-phosphate dehydrogenase [NAD( )] 2, chloroplastic
	3047	NC_026148.1 - XP_011076583.1	84.058	69	11	0	1	69	557	489	3.79e-14	76.1	NC_026148.1_-_XP_011076583.1	83	58	58	0	84.06	1	-1	TGCAGAGCAGCTCTAGCATCTGTCGTGGCGACAATGTTTTCTGGCAGCTTGTGTGCCGGAAAATACTTA	TGTAGAGCAGCTTTAGCATCTGTAGTTGCAATGACATTTTCTGGAAGCTTGTGTGCTGGAAAATACTTA	69	1347	NC_026148.1_-_XP_011076583.1 Sesamum indicum cultivar Zhongzhi No. 13 linkage group LG4, S_indicum_v1.0, whole genome shotgun sequence	glycerol-3-phosphate dehydrogenase [NAD( )] 2, chloroplastic
	3051	NC_026159.1 - XP_020554677.1	86.957	69	9	0	1	69	549	617	7.32e-17	85.1	NC_026159.1_-_XP_020554677.1	93	60	60	0	86.96	1	1	TGCAGAGCAGGGAAGTGCGATTGCTGCGGCAGTTGAAGGTGTTGAGCGTCAGTTTGGAAGCAATCTCTC	TGCTGAGCAGGGAAGTGCTATTGCAGCTGCAGTTGAAGGTGTAGAACGCCAATTTGGAAGCAATTTCTC	69	1659	NC_026159.1_-_XP_020554677.1 Sesamum indicum cultivar Zhongzhi No. 13 linkage group LG15, S_indicum_v1.0, whole genome shotgun sequence	CBS domain-containing protein CBSCBSPB3 isoform X2
	3051	NC_026159.1 - XP_011099699.1	86.957	69	9	0	1	69	549	617	7.32e-17	85.1	NC_026159.1_-_XP_011099699.1	93	60	60	0	86.96	1	1	TGCAGAGCAGGGAAGTGCGATTGCTGCGGCAGTTGAAGGTGTTGAGCGTCAGTTTGGAAGCAATCTCTC	TGCTGAGCAGGGAAGTGCTATTGCAGCTGCAGTTGAAGGTGTAGAACGCCAATTTGGAAGCAATTTCTC	69	1638	NC_026159.1_-_XP_011099699.1 Sesamum indicum cultivar Zhongzhi No. 13 linkage group LG15, S_indicum_v1.0, whole genome shotgun sequence	CBS domain-containing protein CBSCBSPB3 isoform X2
	3052	NC_026149.1 - XP_011079347.1	87.037	54	7	0	1	54	569	516	1.96e-11	67.1	NC_026149.1_-_XP_011079347.1	73	47	47	0	87.04	1	-1	TGCAGAGCAGGTAATTGTTCGAGCAAGGCAGGGGTGTCTACCTTCTTCCTTCTC	TGCAAAGCAGGTAAGTGCTCGAGCAAGGCAGGAGTGTCAAACTTCTTCGTTCTC	69	1824	NC_026149.1_-_XP_011079347.1 Sesamum indicum cultivar Zhongzhi No. 13 linkage group LG5, S_indicum_v1.0, whole genome shotgun sequence	putative clathrin assembly protein At5g35200 isoform X3
	3052	NC_026149.1 - XP_020549370.1	87.037	54	7	0	1	54	569	516	1.96e-11	67.1	NC_026149.1_-_XP_020549370.1	73	47	47	0	87.04	1	-1	TGCAGAGCAGGTAATTGTTCGAGCAAGGCAGGGGTGTCTACCTTCTTCCTTCTC	TGCAAAGCAGGTAAGTGCTCGAGCAAGGCAGGAGTGTCAAACTTCTTCGTTCTC	69	1821	NC_026149.1_-_XP_020549370.1 Sesamum indicum cultivar Zhongzhi No. 13 linkage group LG5, S_indicum_v1.0, whole genome shotgun sequence	putative clathrin assembly protein At5g35200 isoform X3
	3069	NC_026154.1 - XP_011092726.1	84.058	69	11	0	1	69	419	351	3.79e-14	76.1	NC_026154.1_-_XP_011092726.1	83	58	58	0	84.06	1	-1	TGCAGAGCATTCTCTGCTGCATCATGAGTATTGAACTCAATGAACCCATATCCATCTGACTGACCGGTC	TGCAGAACATTTTCTGCTGCTAAATGAGTATTGAACTCAACAAACCCATATCTCTCTGATTGACCAGTC	69	1212	NC_026154.1_-_XP_011092726.1 Sesamum indicum cultivar Zhongzhi No. 13 linkage group LG10, S_indicum_v1.0, whole genome shotgun sequence	polyadenylate-binding protein RBP47-like isoform X2
	3069	NC_026154.1 - XP_011092727.1	84.058	69	11	0	1	69	419	351	3.79e-14	76.1	NC_026154.1_-_XP_011092727.1	83	58	58	0	84.06	1	-1	TGCAGAGCATTCTCTGCTGCATCATGAGTATTGAACTCAATGAACCCATATCCATCTGACTGACCGGTC	TGCAGAACATTTTCTGCTGCTAAATGAGTATTGAACTCAACAAACCCATATCTCTCTGATTGACCAGTC	69	1164	NC_026154.1_-_XP_011092727.1 Sesamum indicum cultivar Zhongzhi No. 13 linkage group LG10, S_indicum_v1.0, whole genome shotgun sequence	polyadenylate-binding protein RBP47-like isoform X2
	3070	NC_026155.1 - XP_011094460.1	83.077	65	11	0	3	67	883	947	5.63e-12	68.9	NC_026155.1_-_XP_011094460.1	75	54	54	0	83.08	1	1	CAGAGCATTGCTGTCAATGGGCAACTGTTACCTATTGATCCAGCAATGTTTACAACATCAGCCAA	CAGAGCATTGCTGTCAACGGAGAAGTATTACCTATTGATCCGGCAGTTTTTGCAACATCTGGCAA	69	1506	NC_026155.1_-_XP_011094460.1 Sesamum indicum cultivar Zhongzhi No. 13 linkage group LG11, S_indicum_v1.0, whole genome shotgun sequence	aspartic proteinase-like protein 2 isoform X2
	3070	NC_026155.1 - XP_020553625.1	83.077	65	11	0	3	67	778	842	5.63e-12	68.9	NC_026155.1_-_XP_020553625.1	75	54	54	0	83.08	1	1	CAGAGCATTGCTGTCAATGGGCAACTGTTACCTATTGATCCAGCAATGTTTACAACATCAGCCAA	CAGAGCATTGCTGTCAACGGAGAAGTATTACCTATTGATCCGGCAGTTTTTGCAACATCTGGCAA	69	1401	NC_026155.1_-_XP_020553625.1 Sesamum indicum cultivar Zhongzhi No. 13 linkage group LG11, S_indicum_v1.0, whole genome shotgun sequence	aspartic proteinase-like protein 2 isoform X2
	3075	NC_026147.1 - XP_011073464.1	85.075	67	10	0	1	67	771	705	1.09e-14	77	NC_026147.1_-_XP_011073464.1	84	57	57	0	85.07	1	-1	TGCAGAGCCAACTCTCCTCAGTACACCAAGCTGATTTGCTTCAGAAAACATGGAATATAATAAACTG	TGCAGAGCCAACTCTTCTCAGAACACCTAGTTGATTTTCTTCAGAAAATATGGTATAAATTGAACTG	69	2169	NC_026147.1_-_XP_011073464.1 Sesamum indicum cultivar Zhongzhi No. 13 linkage group LG3, S_indicum_v1.0, whole genome shotgun sequence	dymeclin isoform X3
	3075	NC_026147.1 - XP_011073465.1	85.075	67	10	0	1	67	768	702	1.09e-14	77	NC_026147.1_-_XP_011073465.1	84	57	57	0	85.07	1	-1	TGCAGAGCCAACTCTCCTCAGTACACCAAGCTGATTTGCTTCAGAAAACATGGAATATAATAAACTG	TGCAGAGCCAACTCTTCTCAGAACACCTAGTTGATTTTCTTCAGAAAATATGGTATAAATTGAACTG	69	2166	NC_026147.1_-_XP_011073465.1 Sesamum indicum cultivar Zhongzhi No. 13 linkage group LG3, S_indicum_v1.0, whole genome shotgun sequence	dymeclin isoform X3
	3078	NC_026152.1 - XP_011087987.1	86.957	69	9	0	1	69	1628	1560	7.32e-17	85.1	NC_026152.1_-_XP_011087987.1	93	60	60	0	86.96	1	-1	TGCAGAGCCACAATAACCTCAACTCTCCTAACATCATCGTGCACTACCCATTCAGATAGCTGTTTGAGA	TGCAGAGCCACAATTACCTCCACTCTCCGAACATCATCGTGCATTACCCATTCTGACAGTTCTTTAAGA	69	3894	NC_026152.1_-_XP_011087987.1 Sesamum indicum cultivar Zhongzhi No. 13 linkage group LG8, S_indicum_v1.0, whole genome shotgun sequence	myb-binding protein 1A-like protein
	3098	NC_026145.1 - XP_011081061.1	86.667	75	4	2	1	69	1025	1099	6.01e-18	87.8	NC_026145.1_-_XP_011081061.1	96	65	65	6	86.67	1	1	TGCAGAGCCGGTGCATGGCGATGGAGAGGCAGATAGAGAAGCTCTTGGAGAAGAAGA----AG--GGGTCGTATT	TGCAGAGCCAGTGCATGGCGATGGAGAGGCAGATTGAGAAGCTGGTGGAGAAGAAGAGATCAGCAGGGTCGTATT	69	1251	NC_026145.1_-_XP_011081061.1 Sesamum indicum cultivar Zhongzhi No. 13 linkage group LG1, S_indicum_v1.0, whole genome shotgun sequence	root phototropism protein 3
	3099	NC_026145.1 - XP_011081061.1	86.667	75	4	2	1	69	1025	1099	6.01e-18	87.8	NC_026145.1_-_XP_011081061.1	96	65	65	6	86.67	1	1	TGCAGAGCCGGTGCATGGCGATGGAGAGGCAGATAGAGAAGCTCTTGGAGAAGAAGA----AG--GGGTCGTATT	TGCAGAGCCAGTGCATGGCGATGGAGAGGCAGATTGAGAAGCTGGTGGAGAAGAAGAGATCAGCAGGGTCGTATT	69	1251	NC_026145.1_-_XP_011081061.1 Sesamum indicum cultivar Zhongzhi No. 13 linkage group LG1, S_indicum_v1.0, whole genome shotgun sequence	root phototropism protein 3
	3100	NC_026152.1 - XP_011087710.1	85.455	55	8	0	8	62	503	449	6.86e-11	64.4	NC_026152.1_-_XP_011087710.1	70	47	47	0	85.45	1	-1	CCTATATGCATCTGAAAAGCAGCCAGAGATTTCCCAGGATCTTGAATCATGGATG	CCAATGTGCATCTGGAAAGCGGCAAGATATTTTCCAGGATCTTGCATCATGGATG	69	1359	NC_026152.1_-_XP_011087710.1 Sesamum indicum cultivar Zhongzhi No. 13 linkage group LG8, S_indicum_v1.0, whole genome shotgun sequence	COBRA-like protein 6
	3101	NC_026150.1 - XP_011083217.1	84.058	69	11	0	1	69	658	590	3.79e-14	76.1	NC_026150.1_-_XP_011083217.1	83	58	58	0	84.06	1	-1	TGCAGAGCCTATCCCAAAAGTTCATTATGTGATGTCCCGAAAGTAGCCTCGATCCACCTTCTCTACCAT	TGCAAAGCCGGTCCCAGAAGTTCATTATGTGACGTCCAGAGAGCAACCTGGATCCACCTTCCCTACCAT	69	2133	NC_026150.1_-_XP_011083217.1 Sesamum indicum cultivar Zhongzhi No. 13 linkage group LG6, S_indicum_v1.0, whole genome shotgun sequence	PHD finger protein At1g33420
	3103	NC_026155.1 - XP_011094034.1	81.538	65	12	0	5	69	988	1052	6.86e-11	64.4	NC_026155.1_-_XP_011094034.1	70	53	53	0	81.54	1	1	GAGCCTGTTTTCATGCACTGGCCCGGGAAGAAGCTGAGAGATAGAGCTTTACGGACTGTTATGGA	GAACCTGTTTTGATGCGTTGGCCTGGGAAGAAGTTGAGAGATAAGGCGCTTCGCACTGTTATGGA	69	2274	NC_026155.1_-_XP_011094034.1 Sesamum indicum cultivar Zhongzhi No. 13 linkage group LG11, S_indicum_v1.0, whole genome shotgun sequence	cycloartenol Synthase
	3107	NC_026145.1 - XP_011086264.2	91.071	56	5	0	1	56	56	1	3.11e-15	79.7	NC_026145.1_-_XP_011086264.2	87	51	51	0	91.07	1	-1	TGCAGAGCGAAATCCTGAGGCGATCCCGGATGCAGAATTGCTTGCCTGAATAAATC	TGAAGAGCGAAATCTTGAGGCGGTCCCGGATGCAGAATTGCTTTTCTGAATAAATC	69	1827	NC_026145.1_-_XP_011086264.2 Sesamum indicum cultivar Zhongzhi No. 13 linkage group LG1, S_indicum_v1.0, whole genome shotgun sequence	THO complex subunit 1
	3109	NC_026155.1 - XP_011094803.1	86.957	69	9	0	1	69	1224	1292	7.32e-17	85.1	NC_026155.1_-_XP_011094803.1	93	60	60	0	86.96	1	1	TGCAGAGCGACTCAAGGCAAGAGAAGCTTTAGCACACCCCTTCTTTACAAGGGACCTTAGGAGATTTGG	TGCAGAACGACTTAAAGCAAGAGAAGCTCTAGGGCACCCCTTTTTTACAAGGGACCTTAGAAGGTTTGG	69	1305	NC_026155.1_-_XP_011094803.1 Sesamum indicum cultivar Zhongzhi No. 13 linkage group LG11, S_indicum_v1.0, whole genome shotgun sequence	serine/threonine-protein kinase AFC1 isoform X2
	3109	NC_026155.1 - XP_011094804.1	86.957	69	9	0	1	69	924	992	7.32e-17	85.1	NC_026155.1_-_XP_011094804.1	93	60	60	0	86.96	1	1	TGCAGAGCGACTCAAGGCAAGAGAAGCTTTAGCACACCCCTTCTTTACAAGGGACCTTAGGAGATTTGG	TGCAGAACGACTTAAAGCAAGAGAAGCTCTAGGGCACCCCTTTTTTACAAGGGACCTTAGAAGGTTTGG	69	1005	NC_026155.1_-_XP_011094804.1 Sesamum indicum cultivar Zhongzhi No. 13 linkage group LG11, S_indicum_v1.0, whole genome shotgun sequence	serine/threonine-protein kinase AFC1 isoform X2
	3146	NC_026148.1 - XP_011075242.1	82.609	69	12	0	1	69	1323	1391	4.62e-13	71.6	NC_026148.1_-_XP_011075242.1	78	57	57	0	82.61	1	1	TGCAGAGCTAGGCCGCCTTGACAAGCTGGTATCGTTAGATTTGTCGAACAATCAGCTGAGTGGAAGCAT	TGCAGAGCTAGGACGACTTGACAAGCTCGTGTCCCTGGATGTATCAAATAATCAGCTCAGTGGAAGCAT	69	2670	NC_026148.1_-_XP_011075242.1 Sesamum indicum cultivar Zhongzhi No. 13 linkage group LG4, S_indicum_v1.0, whole genome shotgun sequence	leucine-rich repeat receptor-like tyrosine-protein kinase PXC3
	3151	NC_026153.1 - XP_011088820.1	83.333	66	11	0	4	69	991	1056	1.61e-12	70.7	NC_026153.1_-_XP_011088820.1	77	55	55	0	83.33	1	1	AGAGCTATGGCTCCTGGCCTTTTGGATTCTGAGATTCTTGGACTTCAGACACTTGAGCATGTCATG	AGGGCTATGGCTCCTGGTCTCTTGGATTCTGAGATTTTAGGCCTTCAGACTTTGGAACATGTGATG	69	2064	NC_026153.1_-_XP_011088820.1 Sesamum indicum cultivar Zhongzhi No. 13 linkage group LG9, S_indicum_v1.0, whole genome shotgun sequence	putative phospholipid:diacylglycerol acyltransferase 2
	3154	NC_026150.1 - XP_011082131.1	86.765	68	9	0	2	69	1272	1339	2.56e-16	83.3	NC_026150.1_-_XP_011082131.1	91	59	59	0	86.76	1	1	GCAGAGCTCAATGGTTTTCTACGAAAATGCAGGATTGCAAAATCTTTATGACATTGTGCATTATTGTC	GCAGAGCTCAATGGTCTTTTTTGAAAATTCAGGGTTGCAAAATCTTTACGACATTGTGCGGTATTGTC	69	2133	NC_026150.1_-_XP_011082131.1 Sesamum indicum cultivar Zhongzhi No. 13 linkage group LG6, S_indicum_v1.0, whole genome shotgun sequence	mediator of RNA polymerase II transcription subunit 34 isoform X4
	3154	NC_026150.1 - XP_011082132.1	86.765	68	9	0	2	69	969	1036	2.56e-16	83.3	NC_026150.1_-_XP_011082132.1	91	59	59	0	86.76	1	1	GCAGAGCTCAATGGTTTTCTACGAAAATGCAGGATTGCAAAATCTTTATGACATTGTGCATTATTGTC	GCAGAGCTCAATGGTCTTTTTTGAAAATTCAGGGTTGCAAAATCTTTACGACATTGTGCGGTATTGTC	69	1830	NC_026150.1_-_XP_011082132.1 Sesamum indicum cultivar Zhongzhi No. 13 linkage group LG6, S_indicum_v1.0, whole genome shotgun sequence	mediator of RNA polymerase II transcription subunit 34 isoform X4
	3170	NC_026146.1 - XP_011100603.1	80.882	68	13	0	1	68	977	910	6.86e-11	65.3	NC_026146.1_-_XP_011100603.1	71	55	55	0	80.88	1	-1	TGCAGAGCTCTCAGTTGAGTCTCCCTTGAGATTCCCATCTCTGCTATTCCTATGTAATAAATCATATT	TGCAGAGCTCTGAGTTGAGTATCCTTTGAGGTTCCCAGTTCTGCTATCTGTATGTAGTTCATCATGTT	69	1359	NC_026146.1_-_XP_011100603.1 Sesamum indicum cultivar Zhongzhi No. 13 linkage group LG2, S_indicum_v1.0, whole genome shotgun sequence	tryptophan aminotransferase-related protein 4-like
	3176	NC_026153.1 - XP_020552295.1	82.609	69	12	0	1	69	1825	1893	4.62e-13	71.6	NC_026153.1_-_XP_020552295.1	78	57	57	0	82.61	1	1	TGCAGAGCTGAAAGTCCTGCCTCGATGAACAATTTGCCACTTTGGAGATTCGAGAACCTACTGGAAACT	TGCAGAGCTGAGAGTCCTGCCTCAATGAATGACTTACCACTTTGGAAGTTTGAAAACCTAGTAGAAACT	69	3240	NC_026153.1_-_XP_020552295.1 Sesamum indicum cultivar Zhongzhi No. 13 linkage group LG9, S_indicum_v1.0, whole genome shotgun sequence	trafficking protein particle complex subunit 11 isoform X3
	3176	NC_026153.1 - XP_020552296.1	82.609	69	12	0	1	69	1405	1473	4.62e-13	71.6	NC_026153.1_-_XP_020552296.1	78	57	57	0	82.61	1	1	TGCAGAGCTGAAAGTCCTGCCTCGATGAACAATTTGCCACTTTGGAGATTCGAGAACCTACTGGAAACT	TGCAGAGCTGAGAGTCCTGCCTCAATGAATGACTTACCACTTTGGAAGTTTGAAAACCTAGTAGAAACT	69	2820	NC_026153.1_-_XP_020552296.1 Sesamum indicum cultivar Zhongzhi No. 13 linkage group LG9, S_indicum_v1.0, whole genome shotgun sequence	trafficking protein particle complex subunit 11 isoform X3
	3177	NC_026154.1 - XP_011092986.1	84.375	64	10	0	2	65	1754	1691	4.62e-13	71.6	NC_026154.1_-_XP_011092986.1	78	54	54	0	84.38	1	-1	GCAGAGCTGAAATACATGAGCTTTCCCATAACCAAAAGACACTTATGGCGAACAGGACCACTGA	GCAGGGCTGAAGTACATGAGTTTGCCAATAACTGAAAGACATTTATGGCGAACAGGCCCATTGA	69	5649	NC_026154.1_-_XP_011092986.1 Sesamum indicum cultivar Zhongzhi No. 13 linkage group LG10, S_indicum_v1.0, whole genome shotgun sequence	E3 ubiquitin-protein ligase UPL3 isoform X2
	3177	NC_026154.1 - XP_020553036.1	84.375	64	10	0	2	65	914	851	4.62e-13	71.6	NC_026154.1_-_XP_020553036.1	78	54	54	0	84.38	1	-1	GCAGAGCTGAAATACATGAGCTTTCCCATAACCAAAAGACACTTATGGCGAACAGGACCACTGA	GCAGGGCTGAAGTACATGAGTTTGCCAATAACTGAAAGACATTTATGGCGAACAGGCCCATTGA	69	4809	NC_026154.1_-_XP_020553036.1 Sesamum indicum cultivar Zhongzhi No. 13 linkage group LG10, S_indicum_v1.0, whole genome shotgun sequence	E3 ubiquitin-protein ligase UPL3 isoform X2
	3178	NC_026160.1 - XP_011100304.1	89.706	68	7	0	2	69	1585	1652	4.93e-19	92.4	NC_026160.1_-_XP_011100304.1	101	61	61	0	89.71	1	1	GCAGAGCTGAAGCATGGCAGTGTTGTGATTGCTGCAATTACAAGTTGTACAAACACATCAAACCCCAG	GCAGAGCTTAAGCATGGTAGTGTTGTGATTGCTGCTATCACGAGTTGTACAAATACATCAAACCCAAG	69	3006	NC_026160.1_-_XP_011100304.1 Sesamum indicum cultivar Zhongzhi No. 13 linkage group LG16, S_indicum_v1.0, whole genome shotgun sequence	aconitate hydratase, cytoplasmic
	3178	NC_026156.1 - XP_011095404.1	86.957	69	9	0	1	69	1614	1682	7.32e-17	85.1	NC_026156.1_-_XP_011095404.1	93	60	60	0	86.96	1	1	TGCAGAGCTGAAGCATGGCAGTGTTGTGATTGCTGCAATTACAAGTTGTACAAACACATCAAACCCCAG	TGCGGAGCTCAAGCATGGAAGTGTTGTCATAGCAGCTATTACAAGTTGCACAAACACATCAAACCCAAG	69	3036	NC_026156.1_-_XP_011095404.1 Sesamum indicum cultivar Zhongzhi No. 13 linkage group LG12, S_indicum_v1.0, whole genome shotgun sequence	putative aconitate hydratase, cytoplasmic
	3184	NC_026147.1 - XP_011071492.1	83.077	65	11	0	1	65	329	265	5.63e-12	68.9	NC_026147.1_-_XP_011071492.1	75	54	54	0	83.08	1	-1	TGCAGAGCTGCTACAAGGCCAAAAGCCAAGTCGTGAATAGAATCTTCAGGAAGCTTACCATCCTG	TGCAGGGCTCTAACAAGGTCATGAGCCAAATCATGTATAGACTCTTCAGGAAGCTTACCATCCTG	69	4110	NC_026147.1_-_XP_011071492.1 Sesamum indicum cultivar Zhongzhi No. 13 linkage group LG3, S_indicum_v1.0, whole genome shotgun sequence	serine/threonine-protein kinase RUNKEL
	3185	NC_026145.1 - XP_011088064.1	89.855	69	7	0	1	69	555	623	1.41e-19	94.2	NC_026145.1_-_XP_011088064.1	103	62	62	0	89.86	1	1	TGCAGAGCTGGAGAAACGGCGAGAGAATTTCACCAAGGAGCTCGATTTCGTCTTTGCTGATGTGGTAAT	TGCAGAGCTGGAGAAGCGTAGAGAAAACTTCACCAAGGAGCTAGATTTTGTCTTTGCTGATGTGGTAAT	69	1164	NC_026145.1_-_XP_011088064.1 Sesamum indicum cultivar Zhongzhi No. 13 linkage group LG1, S_indicum_v1.0, whole genome shotgun sequence	protein RETICULATA-RELATED 4, chloroplastic
	3191	NC_026160.1 - XP_011100291.1	88.333	60	7	0	1	60	1178	1237	1.09e-14	77.9	NC_026160.1_-_XP_011100291.1	85	53	53	0	88.33	1	1	TGCAGAGCTGTATGAATCACTCTTGCATCCCTAATGCGAAAGCATTCAAACGAGAAGAGG	TGCAGAGTTGTATGAATCATTCCTGTATTCCTAATGCAAAGGCATTCAAACGAGAAGAGG	69	1404	NC_026160.1_-_XP_011100291.1 Sesamum indicum cultivar Zhongzhi No. 13 linkage group LG16, S_indicum_v1.0, whole genome shotgun sequence	histone-lysine N-methyltransferase ATXR2 isoform X4
	3191	NC_026160.1 - XP_020555011.1	88.136	59	7	0	1	59	1178	1236	3.79e-14	76.1	NC_026160.1_-_XP_020555011.1	83	52	52	0	88.14	1	1	TGCAGAGCTGTATGAATCACTCTTGCATCCCTAATGCGAAAGCATTCAAACGAGAAGAG	TGCAGAGTTGTATGAATCATTCCTGTATTCCTAATGCAAAGGCATTCAAACGAGAAGAG	69	1284	NC_026160.1_-_XP_020555011.1 Sesamum indicum cultivar Zhongzhi No. 13 linkage group LG16, S_indicum_v1.0, whole genome shotgun sequence	histone-lysine N-methyltransferase ATXR2 isoform X4
	3192	NC_026145.1 - XP_011091302.1	83.333	66	11	0	4	69	1278	1343	1.61e-12	70.7	NC_026145.1_-_XP_011091302.1	77	55	55	0	83.33	1	1	AGAGCTGTTGACAGCTGGTAGCGCTCAAGCAGAAATGCTTTTGAGTGAGGAGCAGTCTAAGATAGG	AGAGCTGATGGCAGCTGGGAGCACTCAAGCAGAAACACTTTTGCATGAAGAGCAGTCTAAAATTGG	69	2133	NC_026145.1_-_XP_011091302.1 Sesamum indicum cultivar Zhongzhi No. 13 linkage group LG1, S_indicum_v1.0, whole genome shotgun sequence	nuclear pore complex protein NUP85
	3193	NC_026145.1 - XP_011091302.1	83.333	66	11	0	4	69	1278	1343	1.61e-12	70.7	NC_026145.1_-_XP_011091302.1	77	55	55	0	83.33	1	1	AGAGCTGTTGACAGCTGGTAGCGCTCAAGCAGAAATGCTTTTGAGTGAGGAGCAGTCTAAGATAGG	AGAGCTGATGGCAGCTGGGAGCACTCAAGCAGAAACACTTTTGCATGAAGAGCAGTCTAAAATTGG	69	2133	NC_026145.1_-_XP_011091302.1 Sesamum indicum cultivar Zhongzhi No. 13 linkage group LG1, S_indicum_v1.0, whole genome shotgun sequence	nuclear pore complex protein NUP85
	3203	NC_026150.1 - XP_011079527.1	88.06	67	8	0	1	67	1816	1750	2.1e-17	86	NC_026150.1_-_XP_011079527.1	94	59	59	0	88.06	1	-1	TGCAGAGCTTCAAATTGAATCTGGCCATGATCCTAGCTAGCTGCTGTCTAACATTGTCCGCGGATTT	TGCATAGCTTCAAATTGAATCTGGCCATAATGCGAGCTAGCTGCTGTCTGACATTGTCTGCAGACTT	69	2184	NC_026150.1_-_XP_011079527.1 Sesamum indicum cultivar Zhongzhi No. 13 linkage group LG6, S_indicum_v1.0, whole genome shotgun sequence	probable pre-mRNA-splicing factor ATP-dependent RNA helicase DEAH2 isoform X3
	3206	NC_026150.1 - XP_011082592.1	92.647	68	5	0	1	68	1043	976	9.52e-22	101	NC_026150.1_-_XP_011082592.1	111	63	63	0	92.65	1	-1	TGCAGAGCTTCGAGGATTTGTTTCAATGTCTCTAAATCCCTCGATGGCTCGTCGATTCCTCTCATTTT	TGCAGAGCTTCGAGGATTTGTTTCAAGGTCTCTAAATCTTTTGATGGCTCGTCTATTCCTCTCATTTT	69	2400	NC_026150.1_-_XP_011082592.1 Sesamum indicum cultivar Zhongzhi No. 13 linkage group LG6, S_indicum_v1.0, whole genome shotgun sequence	protein LONGIFOLIA 1
	3206	NC_026150.1 - XP_020549830.1	87.302	63	8	0	6	68	1011	949	3.11e-15	78.8	NC_026150.1_-_XP_020549830.1	86	55	55	0	87.3	1	-1	AGCTTCGAGGATTTGTTTCAATGTCTCTAAATCCCTCGATGGCTCGTCGATTCCTCTCATTTT	AGCTTCGAGGATTTGTTTCAAGGTGTCTAAATCTTTGGACGACTCCTCGATTCCTCTCATTTT	69	2379	NC_026150.1_-_XP_020549830.1 Sesamum indicum cultivar Zhongzhi No. 13 linkage group LG6, S_indicum_v1.0, whole genome shotgun sequence	protein LONGIFOLIA 1
	3225	NC_026150.1 - XP_011081956.1	84.058	69	11	0	1	69	1322	1390	3.79e-14	76.1	NC_026150.1_-_XP_011081956.1	83	58	58	0	84.06	1	1	TGCAGAGGAACTTGAAGCTGAGCGACGAGAATCTGGAGGCATCTCGGGCGACTCTGCATAGGTTCGGCA	TGCAGAGGAACTTGAAACTGAGTGACAAGAACCTGGAGGCATCACGTGCTGCACTGCACAGGTTTGGCA	69	1602	NC_026150.1_-_XP_011081956.1 Sesamum indicum cultivar Zhongzhi No. 13 linkage group LG6, S_indicum_v1.0, whole genome shotgun sequence	3-ketoacyl-CoA synthase 10
	3232	NC_026152.1 - XP_020551253.1	84.746	59	9	0	1	59	1882	1824	1.96e-11	67.1	NC_026152.1_-_XP_020551253.1	73	50	50	0	84.75	1	-1	TGCAGAGGAAGCTAGTCTTACCGGAGCCTACCGAACCGCAAACAGCCACCTTGGTTCCT	TGCAGAGGAAACTCGTTTTACCGGAGCCAACTGAACCACAAATAGCCACCTTGCTCCCT	69	4329	NC_026152.1_-_XP_020551253.1 Sesamum indicum cultivar Zhongzhi No. 13 linkage group LG8, S_indicum_v1.0, whole genome shotgun sequence	putative ABC transporter C family member 15
	3232	NC_026152.1 - XP_011086731.1	84.746	59	9	0	1	59	1882	1824	1.96e-11	67.1	NC_026152.1_-_XP_011086731.1	73	50	50	0	84.75	1	-1	TGCAGAGGAAGCTAGTCTTACCGGAGCCTACCGAACCGCAAACAGCCACCTTGGTTCCT	TGCAGAGGAAACTCGTTTTACCGGAGCCAACTGAACCACAAATAGCCACCTTGCTCCCT	69	4329	NC_026152.1_-_XP_011086731.1 Sesamum indicum cultivar Zhongzhi No. 13 linkage group LG8, S_indicum_v1.0, whole genome shotgun sequence	putative ABC transporter C family member 15
	3237	NC_026149.1 - XP_011078890.1	90.323	62	6	0	5	66	1057	1118	2.1e-17	86	NC_026149.1_-_XP_011078890.1	94	56	56	0	90.32	1	1	GAGGAAGTGGCTGGCATAAAGGAGGGATTCCGACTGATGGATACGAGCAACAAGGGGAAGAT	GAGGAAGTGGCGGGCATAAAGGAGGGATTCCAGTTGATGGATACAGGCAACAAGGGGAAGAT	69	1578	NC_026149.1_-_XP_011078890.1 Sesamum indicum cultivar Zhongzhi No. 13 linkage group LG5, S_indicum_v1.0, whole genome shotgun sequence	calcium-dependent protein kinase 32
	3237	NC_026148.1 - XP_011075228.1	90.323	62	6	0	5	66	1066	1127	2.1e-17	86	NC_026148.1_-_XP_011075228.1	94	56	56	0	90.32	1	1	GAGGAAGTGGCTGGCATAAAGGAGGGATTCCGACTGATGGATACGAGCAACAAGGGGAAGAT	GAGGAAGTGGCAGGCATAAAAGAGGGATTCCAATTGATGGACACGAGCAACAAGGGAAAGAT	69	1593	NC_026148.1_-_XP_011075228.1 Sesamum indicum cultivar Zhongzhi No. 13 linkage group LG4, S_indicum_v1.0, whole genome shotgun sequence	calcium-dependent protein kinase 32
	3239	NC_026145.1 - XP_011072846.1	85.714	56	8	0	2	57	52	107	1.96e-11	66.2	NC_026145.1_-_XP_011072846.1	72	48	48	0	85.71	1	1	GCAGAGGAAGTTGCTCGAGGAATTGATGGCTCTGGCCTCACCGCTATTGTTACTGG	GCCGAGGAAGTTTCCCGAGGAATTGATGGCTCCGGCCTTACTGCTATTGTCACAGG	69	948	NC_026145.1_-_XP_011072846.1 Sesamum indicum cultivar Zhongzhi No. 13 linkage group LG1, S_indicum_v1.0, whole genome shotgun sequence	short-chain dehydrogenase TIC 32, chloroplastic-like
	3243	NC_026154.1 - XP_011090985.1	84.746	59	9	0	3	61	3376	3434	1.96e-11	67.1	NC_026154.1_-_XP_011090985.1	73	50	50	0	84.75	1	1	CAGAGGAATCTTGAGTGCATTGAAGTAATACCGACAAAGGAATCTGTTAGGAGCATAGA	CAAAGGAACCTCGAATGCATTGAAGTAATACCAACAAAGGAATCAATTAGAAGTATAGA	69	3999	NC_026154.1_-_XP_011090985.1 Sesamum indicum cultivar Zhongzhi No. 13 linkage group LG10, S_indicum_v1.0, whole genome shotgun sequence	putative E3 ubiquitin-protein ligase LIN-1
	3244	NC_026147.1 - XP_020548263.1	81.69	71	10	1	2	69	1115	1045	5.63e-12	68.9	NC_026147.1_-_XP_020548263.1	75	58	58	3	81.69	1	-1	GCAGAGGAATGATAATCTTTGTGCAGTGTTTTAGTTGTCCACAAGTCTT---CATCTTTCTCAGACCAAAG	GCAGAGGAATGATAATGTCTGTGCAACGCTTTAGGTTTCCACGAATCTTCTCCATCTTTCTCAGTCCAAAG	69	1614	NC_026147.1_-_XP_020548263.1 Sesamum indicum cultivar Zhongzhi No. 13 linkage group LG3, S_indicum_v1.0, whole genome shotgun sequence	U5 small nuclear ribonucleoprotein 40 kDa protein
	3254	NC_026147.1 - XP_011073561.1	82.609	69	12	0	1	69	2141	2073	4.62e-13	71.6	NC_026147.1_-_XP_011073561.1	78	57	57	0	82.61	1	-1	TGCAGAGGACTTGAATAATCCATTGATGAGAGAGGCTTCTGCAAATTCCATTTCATTACTTCCTCTCCA	TGCAAAGGACTTGAGTAATCCATTGCCAACACAGGCTTCTGCAAGTCCCATTTCATTATTTGCTCCCCA	69	2913	NC_026147.1_-_XP_011073561.1 Sesamum indicum cultivar Zhongzhi No. 13 linkage group LG3, S_indicum_v1.0, whole genome shotgun sequence	KIN14B-interacting protein At4g14310
	3256	NC_026159.1 - XP_011098511.1	89.796	49	5	0	1	49	528	576	1.96e-11	67.1	NC_026159.1_-_XP_011098511.1	73	44	44	0	89.8	1	1	TGCAGAGGAGAATGAGGGTTTTAGTATTGGTGCATCAACATCCGGTGCT	TGTAGAGGAGAATGAGGGTTTTAGTTTTGATGCATCGACATCAGGTGCT	69	4569	NC_026159.1_-_XP_011098511.1 Sesamum indicum cultivar Zhongzhi No. 13 linkage group LG15, S_indicum_v1.0, whole genome shotgun sequence	DNA repair protein UVH3 isoform X2
	3257	NC_026159.1 - XP_011098511.1	89.796	49	5	0	1	49	528	576	1.96e-11	67.1	NC_026159.1_-_XP_011098511.1	73	44	44	0	89.8	1	1	TGCAGAGGAGAATGAGGGTTTTAGTATTGGTGCATCAACATCCGGTGCT	TGTAGAGGAGAATGAGGGTTTTAGTTTTGATGCATCGACATCAGGTGCT	69	4569	NC_026159.1_-_XP_011098511.1 Sesamum indicum cultivar Zhongzhi No. 13 linkage group LG15, S_indicum_v1.0, whole genome shotgun sequence	DNA repair protein UVH3 isoform X2
	3258	NC_026147.1 - XP_011074326.1	89.706	68	7	0	2	69	1675	1742	4.93e-19	92.4	NC_026147.1_-_XP_011074326.1	101	61	61	0	89.71	1	1	GCAGAGGAGACAAGCAGACTCCTGCTGTGTGAGGCAACAGCAGTTGTGATGAGGCAATGCTTCCATTT	GCAGAGGAGACAAGTAGACTCTTGCTGTGCGAGGCAACAGCAGTTGTCATGAGAAAATGTTTCCATTT	69	1773	NC_026147.1_-_XP_011074326.1 Sesamum indicum cultivar Zhongzhi No. 13 linkage group LG3, S_indicum_v1.0, whole genome shotgun sequence	arginine--tRNA ligase, cytoplasmic isoform X1
	3258	NC_026151.1 - XP_011083561.1	89.706	68	7	0	2	69	1675	1742	4.93e-19	92.4	NC_026151.1_-_XP_011083561.1	101	61	61	0	89.71	1	1	GCAGAGGAGACAAGCAGACTCCTGCTGTGTGAGGCAACAGCAGTTGTGATGAGGCAATGCTTCCATTT	GCAGAGGAGACGAGTAGACTCTTGCTGTGTGAGGCAACAGCAGTTGTAATGAGAAAATGTTTCCATTT	69	1773	NC_026151.1_-_XP_011083561.1 Sesamum indicum cultivar Zhongzhi No. 13 linkage group LG7, S_indicum_v1.0, whole genome shotgun sequence	arginine--tRNA ligase, cytoplasmic-like isoform X1
	3263	NC_026152.1 - XP_011085353.2	85.507	69	10	0	1	69	2298	2366	8.92e-16	80.6	NC_026152.1_-_XP_011085353.2	88	59	59	0	85.51	1	1	TGCAGAGGAGAGGAGGTTGTTGGATGAAGGCTTACAAAACTTCCCTTCATTCTTCAAGCTCTGGCTGAT	TGCAGAGGAGAGGAGGTTGTTGGATGAAGGGCTGAAGCTCTTCCCTTCATTTTTCAAACTTTGGCTGAT	69	3024	NC_026152.1_-_XP_011085353.2 Sesamum indicum cultivar Zhongzhi No. 13 linkage group LG8, S_indicum_v1.0, whole genome shotgun sequence	LOW QUALITY PROTEIN: protein STABILIZED1
	3264	NC_026152.1 - XP_011085353.2	89.855	69	7	0	1	69	2298	2366	1.41e-19	94.2	NC_026152.1_-_XP_011085353.2	103	62	62	0	89.86	1	1	TGCAGAGGAGAGGAGGTTGTTGGATGAAGGTTTGCAACAGTTCCCTTCATTTTTCAAACTCTGGCTGAT	TGCAGAGGAGAGGAGGTTGTTGGATGAAGGGCTGAAGCTCTTCCCTTCATTTTTCAAACTTTGGCTGAT	69	3024	NC_026152.1_-_XP_011085353.2 Sesamum indicum cultivar Zhongzhi No. 13 linkage group LG8, S_indicum_v1.0, whole genome shotgun sequence	LOW QUALITY PROTEIN: protein STABILIZED1
	3270	NC_026147.1 - XP_011071356.1	86.207	58	8	0	1	58	669	726	1.61e-12	69.8	NC_026147.1_-_XP_011071356.1	76	50	50	0	86.21	1	1	TGCAGAGGAGCTTCTCGAAAAAGAACTTCCTCTCAAGTTCGTGGAGGTCGATGAGGAA	TGCAGAGGAACTTCTGGAAAAAGAACTTCCACTTAAATTTGTGGAGGTTGACGAGGAA	69	1242	NC_026147.1_-_XP_011071356.1 Sesamum indicum cultivar Zhongzhi No. 13 linkage group LG3, S_indicum_v1.0, whole genome shotgun sequence	30S ribosomal protein S1, chloroplastic-like
	3272	NC_026151.1 - XP_011084551.1	86.567	67	9	0	1	67	1520	1586	8.92e-16	81.5	NC_026151.1_-_XP_011084551.1	89	58	58	0	86.57	1	1	TGCAGAGGAGGAAACAGATCATAGAGACGTATAGTAGCATGGACGAGATTCTGAAGGAGTGCAATGC	TGCAAAGGAGGAAACTGATCATAGAAAAATATAGTAGCATGGATGAGATTTTGAGAGAGTGCAATGC	69	1677	NC_026151.1_-_XP_011084551.1 Sesamum indicum cultivar Zhongzhi No. 13 linkage group LG7, S_indicum_v1.0, whole genome shotgun sequence	TBC1 domain family member 15-like isoform X2
	3272	NC_026151.1 - XP_020551195.1	86.567	67	9	0	1	67	1517	1583	8.92e-16	81.5	NC_026151.1_-_XP_020551195.1	89	58	58	0	86.57	1	1	TGCAGAGGAGGAAACAGATCATAGAGACGTATAGTAGCATGGACGAGATTCTGAAGGAGTGCAATGC	TGCAAAGGAGGAAACTGATCATAGAAAAATATAGTAGCATGGATGAGATTTTGAGAGAGTGCAATGC	69	1674	NC_026151.1_-_XP_020551195.1 Sesamum indicum cultivar Zhongzhi No. 13 linkage group LG7, S_indicum_v1.0, whole genome shotgun sequence	TBC1 domain family member 15-like isoform X2
	3279	NC_026159.1 - XP_011100088.1	94.828	58	3	0	1	58	746	803	4.93e-19	92.4	NC_026159.1_-_XP_011100088.1	101	55	55	0	94.83	1	1	TGCAGAGGAGGGCACAAGCTGTGAATTTGGATGAGGTGGATGTCAAGATCAGTAAGTT	TGCAGAGGAGGGCACAAGCTGTTGATTTGGATGAGGTGGATGTTAAGATCAGTAAGTT	69	2157	NC_026159.1_-_XP_011100088.1 Sesamum indicum cultivar Zhongzhi No. 13 linkage group LG15, S_indicum_v1.0, whole genome shotgun sequence	ABC transporter F family member 5-like
	3281	NC_026153.1 - XP_011089324.1	89.552	67	7	0	3	69	257	323	1.72e-18	90.6	NC_026153.1_-_XP_011089324.1	99	60	60	0	89.55	1	1	CAGAGGAGTATGGAGGACTCGGCCTTGGCTACTTATATCACTGCATAGCTCTGGAGGAAATCAGCCG	CAGAGGAATATGGAGGACTGGGCCTTGGCTATTTGTACCACTGCATAGCTATGGAGGAAATTAGCCG	69	1236	NC_026153.1_-_XP_011089324.1 Sesamum indicum cultivar Zhongzhi No. 13 linkage group LG9, S_indicum_v1.0, whole genome shotgun sequence	isovaleryl-CoA dehydrogenase, mitochondrial isoform X2
	3281	NC_026153.1 - XP_011089325.1	89.552	67	7	0	3	69	173	239	1.72e-18	90.6	NC_026153.1_-_XP_011089325.1	99	60	60	0	89.55	1	1	CAGAGGAGTATGGAGGACTCGGCCTTGGCTACTTATATCACTGCATAGCTCTGGAGGAAATCAGCCG	CAGAGGAATATGGAGGACTGGGCCTTGGCTATTTGTACCACTGCATAGCTATGGAGGAAATTAGCCG	69	1152	NC_026153.1_-_XP_011089325.1 Sesamum indicum cultivar Zhongzhi No. 13 linkage group LG9, S_indicum_v1.0, whole genome shotgun sequence	isovaleryl-CoA dehydrogenase, mitochondrial isoform X2
	3282	NC_026145.1 - XP_011076071.1	85.507	69	10	0	1	69	2222	2154	8.92e-16	80.6	NC_026145.1_-_XP_011076071.1	88	59	59	0	85.51	1	-1	TGCAGAGGAGTCCTCAGAATCTCAGGTAGTTGATATTCTGCGAACCCATCAAATACACATTTTGGATAG	TGCAGAGGAGTCCTTAGAATTTCGGGTAGTTGATACTCCGCGAAAGCATCAAACACGCATCTTGGATAG	69	3630	NC_026145.1_-_XP_011076071.1 Sesamum indicum cultivar Zhongzhi No. 13 linkage group LG1, S_indicum_v1.0, whole genome shotgun sequence	DExH-box ATP-dependent RNA helicase DExH5, mitochondrial
	3283	NC_026145.1 - XP_011076071.1	85.507	69	10	0	1	69	2222	2154	8.92e-16	80.6	NC_026145.1_-_XP_011076071.1	88	59	59	0	85.51	1	-1	TGCAGAGGAGTCCTCAGAATCTCAGGTAGTTGATATTCTGCGAACCCATCAAATACACATTTTGGATAG	TGCAGAGGAGTCCTTAGAATTTCGGGTAGTTGATACTCCGCGAAAGCATCAAACACGCATCTTGGATAG	69	3630	NC_026145.1_-_XP_011076071.1 Sesamum indicum cultivar Zhongzhi No. 13 linkage group LG1, S_indicum_v1.0, whole genome shotgun sequence	DExH-box ATP-dependent RNA helicase DExH5, mitochondrial
	3294	NC_026150.1 - XP_011082471.1	92.647	68	5	0	1	68	701	634	9.52e-22	101	NC_026150.1_-_XP_011082471.1	111	63	63	0	92.65	1	-1	TGCAGAGGATCGCCGTACACCTCGCTGGTGCTCGTTAGCAAGAACCGCGCACCGACTCGCTTCGCCAG	TGCAGAGGATCACCGTACACCTCGCTGGTGCTAGTTAGCAGAAACCGCGCACCGACTCTCTTCGCCAG	69	1293	NC_026150.1_-_XP_011082471.1 Sesamum indicum cultivar Zhongzhi No. 13 linkage group LG6, S_indicum_v1.0, whole genome shotgun sequence	UDP-glucuronic acid decarboxylase 2
	3294	NC_026150.1 - XP_011079661.1	88.235	68	8	0	1	68	710	643	6.01e-18	87.8	NC_026150.1_-_XP_011079661.1	96	60	60	0	88.24	1	-1	TGCAGAGGATCGCCGTACACCTCGCTGGTGCTCGTTAGCAAGAACCGCGCACCGACTCGCTTCGCCAG	TGCAATGGATCACCGTATACCTCGCTGGTGCTCGTTAGCAGAAACCGTGCACCGACTCTCTTCGCCAG	69	1284	NC_026150.1_-_XP_011079661.1 Sesamum indicum cultivar Zhongzhi No. 13 linkage group LG6, S_indicum_v1.0, whole genome shotgun sequence	UDP-glucuronic acid decarboxylase 2-like
	3313	NC_026148.1 - XP_011076184.1	84.058	69	11	0	1	69	684	752	3.79e-14	76.1	NC_026148.1_-_XP_011076184.1	83	58	58	0	84.06	1	1	TGCAGAGGATTTGGGGGGCAGGGACCAAGGGTGCGAGTCATGTAGTAATTATCTGTTCTGTGTTGTGGA	TGCGGAGGATTTGGGGGGTGGGGAGGAAAGGTGTGGGTCGTGTAGCAATTATTTGTTCTGTGTTGTGGA	69	3324	NC_026148.1_-_XP_011076184.1 Sesamum indicum cultivar Zhongzhi No. 13 linkage group LG4, S_indicum_v1.0, whole genome shotgun sequence	DNA mismatch repair protein MSH3
	3323	NC_026146.1 - XP_020547479.1	83.824	68	11	0	1	68	146	79	1.32e-13	74.3	NC_026146.1_-_XP_020547479.1	81	57	57	0	83.82	1	-1	TGCAGAGGCAGAGGCATATCCGAAGCCCTCACACGCACATTCAAACGATCATGATTCTCTTTTTGCTC	TGCAGAGACAAAGGCATATCCGAGGCCCTCACGCGCACGTTCATCCGATCATGCTGTTGTTTTTGCTC	69	429	NC_026146.1_-_XP_020547479.1 Sesamum indicum cultivar Zhongzhi No. 13 linkage group LG2, S_indicum_v1.0, whole genome shotgun sequence	dynein light chain, cytoplasmic-like isoform X3
	3323	NC_026146.1 - XP_011070590.1	83.824	68	11	0	1	68	146	79	1.32e-13	74.3	NC_026146.1_-_XP_011070590.1	81	57	57	0	83.82	1	-1	TGCAGAGGCAGAGGCATATCCGAAGCCCTCACACGCACATTCAAACGATCATGATTCTCTTTTTGCTC	TGCAGAGACAAAGGCATATCCGAGGCCCTCACGCGCACGTTCATCCGATCATGCTGTTGTTTTTGCTC	69	393	NC_026146.1_-_XP_011070590.1 Sesamum indicum cultivar Zhongzhi No. 13 linkage group LG2, S_indicum_v1.0, whole genome shotgun sequence	dynein light chain, cytoplasmic-like isoform X3
	3324	NC_026146.1 - XP_020547479.1	83.824	68	11	0	1	68	146	79	1.32e-13	74.3	NC_026146.1_-_XP_020547479.1	81	57	57	0	83.82	1	-1	TGCAGAGGCAGAGGCATATCCGAAGCCCTCACACGCACATTCAAACGATCATGATTCTCTTTTTGCTC	TGCAGAGACAAAGGCATATCCGAGGCCCTCACGCGCACGTTCATCCGATCATGCTGTTGTTTTTGCTC	69	429	NC_026146.1_-_XP_020547479.1 Sesamum indicum cultivar Zhongzhi No. 13 linkage group LG2, S_indicum_v1.0, whole genome shotgun sequence	dynein light chain, cytoplasmic-like isoform X3
	3324	NC_026146.1 - XP_011070590.1	83.824	68	11	0	1	68	146	79	1.32e-13	74.3	NC_026146.1_-_XP_011070590.1	81	57	57	0	83.82	1	-1	TGCAGAGGCAGAGGCATATCCGAAGCCCTCACACGCACATTCAAACGATCATGATTCTCTTTTTGCTC	TGCAGAGACAAAGGCATATCCGAGGCCCTCACGCGCACGTTCATCCGATCATGCTGTTGTTTTTGCTC	69	393	NC_026146.1_-_XP_011070590.1 Sesamum indicum cultivar Zhongzhi No. 13 linkage group LG2, S_indicum_v1.0, whole genome shotgun sequence	dynein light chain, cytoplasmic-like isoform X3
	3331	NC_026149.1 - XP_011078253.1	81.538	65	12	0	5	69	1082	1018	6.86e-11	64.4	NC_026149.1_-_XP_011078253.1	70	53	53	0	81.54	1	-1	GAGGCAGGGGTGATGGCTTTTCTTATCTTGAAAACATTCCACGCCGTACAAGCGCAGTGCCCCGC	GAGGCGGGGTTGATGGCTTTCCTTATCTTGAATACATTCCAAGCAGTTCCCGCACAGTGGCCTGC	69	1134	NC_026149.1_-_XP_011078253.1 Sesamum indicum cultivar Zhongzhi No. 13 linkage group LG5, S_indicum_v1.0, whole genome shotgun sequence	senescence/dehydration-associated protein At4g35985, chloroplastic-like isoform X2
	3331	NC_026149.1 - XP_020549632.1	81.538	65	12	0	5	69	1070	1006	6.86e-11	64.4	NC_026149.1_-_XP_020549632.1	70	53	53	0	81.54	1	-1	GAGGCAGGGGTGATGGCTTTTCTTATCTTGAAAACATTCCACGCCGTACAAGCGCAGTGCCCCGC	GAGGCGGGGTTGATGGCTTTCCTTATCTTGAATACATTCCAAGCAGTTCCCGCACAGTGGCCTGC	69	1122	NC_026149.1_-_XP_020549632.1 Sesamum indicum cultivar Zhongzhi No. 13 linkage group LG5, S_indicum_v1.0, whole genome shotgun sequence	senescence/dehydration-associated protein At4g35985, chloroplastic-like isoform X2
	3333	NC_026159.1 - XP_011098435.1	85.294	68	10	0	1	68	1476	1409	3.11e-15	78.8	NC_026159.1_-_XP_011098435.1	86	58	58	0	85.29	1	-1	TGCAGAGGCAGTTGGCAGTGCTTGAGGCAATATTCGAGCAGTAGGTAGCTGTTGATAACCGCTACCAC	TGCAGAGGCTGTTGGCAATGCCTGAGGTAATATTCTGGCAGTAGGTAGCTGTGGATGACCACTGCCAC	69	1695	NC_026159.1_-_XP_011098435.1 Sesamum indicum cultivar Zhongzhi No. 13 linkage group LG15, S_indicum_v1.0, whole genome shotgun sequence	protein diaphanous homolog 1
	3333	NC_026157.1 - XP_011097415.1	85.938	64	9	0	5	68	1427	1364	3.79e-14	76.1	NC_026157.1_-_XP_011097415.1	83	55	55	0	85.94	1	-1	GAGGCAGTTGGCAGTGCTTGAGGCAATATTCGAGCAGTAGGTAGCTGTTGATAACCGCTACCAC	GAGGCTGTAGGGAGTGCCTGAGGCAATATTCGAGCAGTAGGAAGATGTGGATAACCACTTCCAC	69	1632	NC_026157.1_-_XP_011097415.1 Sesamum indicum cultivar Zhongzhi No. 13 linkage group LG13, S_indicum_v1.0, whole genome shotgun sequence	protein enabled
	3338	NC_026153.1 - XP_011088909.1	85.714	56	8	0	1	56	533	588	1.96e-11	66.2	NC_026153.1_-_XP_011088909.1	72	48	48	0	85.71	1	1	TGCAGAGGCATTTGTATTCCCAGTCTGGCTTGCAGGCTGAAGGGATTTTCAGATTA	TGCAGAGGCATTTGTATGCTCAAGGTGGCCTGCAGGCTGAAGGTATTTTCAGAATA	69	1512	NC_026153.1_-_XP_011088909.1 Sesamum indicum cultivar Zhongzhi No. 13 linkage group LG9, S_indicum_v1.0, whole genome shotgun sequence	rho GTPase-activating protein 5
	3347	NC_026155.1 - XP_011095001.1	88.462	52	6	0	2	53	512	461	5.63e-12	68	NC_026155.1_-_XP_011095001.1	74	46	46	0	88.46	1	-1	GCAGAGGCCGCAGCTGTAGTTCCTGAAAATGAGCCTACTCCGACTGCCTATA	GCAGAAGCTGCAGCTGCAGTTCCTGAAAATGAGCCTACTCCAACAGCCTGTA	69	1491	NC_026155.1_-_XP_011095001.1 Sesamum indicum cultivar Zhongzhi No. 13 linkage group LG11, S_indicum_v1.0, whole genome shotgun sequence	protein root UVB sensitive 5 isoform X2
	3347	NC_026155.1 - XP_020553500.1	89.796	49	5	0	2	50	531	483	1.96e-11	67.1	NC_026155.1_-_XP_020553500.1	73	44	44	0	89.8	1	-1	GCAGAGGCCGCAGCTGTAGTTCCTGAAAATGAGCCTACTCCGACTGCCT	GCAGAAGCTGCAGCTGCAGTTCCTGAAAATGAGCCTACTCCAACAGCCT	69	1548	NC_026155.1_-_XP_020553500.1 Sesamum indicum cultivar Zhongzhi No. 13 linkage group LG11, S_indicum_v1.0, whole genome shotgun sequence	protein root UVB sensitive 5 isoform X2
	3371	NC_026145.1 - XP_011090500.1	89.855	69	7	0	1	69	35	103	1.41e-19	94.2	NC_026145.1_-_XP_011090500.1	103	62	62	0	89.86	1	1	TGCAGAGGCTGAATGCTGAAAATGTTCCTAAGGACTTGATAGAGAAAGGCCAGAGTCGTGTTATTGAGG	TGCAGAGGCTGAAAGCTGCAAATGTTCCAAATGACTTGATAGAGAAAGGTCAAAATCGTGTTATTGAGG	69	1017	NC_026145.1_-_XP_011090500.1 Sesamum indicum cultivar Zhongzhi No. 13 linkage group LG1, S_indicum_v1.0, whole genome shotgun sequence	arginase 1, mitochondrial isoform X3
	3371	NC_026145.1 - XP_011090497.1	89.855	69	7	0	1	69	35	103	1.41e-19	94.2	NC_026145.1_-_XP_011090497.1	103	62	62	0	89.86	1	1	TGCAGAGGCTGAATGCTGAAAATGTTCCTAAGGACTTGATAGAGAAAGGCCAGAGTCGTGTTATTGAGG	TGCAGAGGCTGAAAGCTGCAAATGTTCCAAATGACTTGATAGAGAAAGGTCAAAATCGTGTTATTGAGG	69	1017	NC_026145.1_-_XP_011090497.1 Sesamum indicum cultivar Zhongzhi No. 13 linkage group LG1, S_indicum_v1.0, whole genome shotgun sequence	arginase 1, mitochondrial isoform X3
	3377	NC_026155.1 - XP_011094307.1	88.406	69	8	0	1	69	1920	1988	1.72e-18	89.7	NC_026155.1_-_XP_011094307.1	98	61	61	0	88.41	1	1	TGCAGAGGCTGTTGAAATGAATTCAGTTTTTGATGATCTGCAACAAACGTTATCAAGTCATCAAGGAGA	TGCAGAGGCTGTTGAAGTAAATTCAGTTTTTGATGACCTTCAGCAAACACTATCAAGTCATCAAGGTGA	69	3030	NC_026155.1_-_XP_011094307.1 Sesamum indicum cultivar Zhongzhi No. 13 linkage group LG11, S_indicum_v1.0, whole genome shotgun sequence	kinesin-like protein KIN-5C
	3377	NC_026149.1 - XP_020549377.1	84.058	69	11	0	1	69	1920	1988	3.79e-14	76.1	NC_026149.1_-_XP_020549377.1	83	58	58	0	84.06	1	1	TGCAGAGGCTGTTGAAATGAATTCAGTTTTTGATGATCTGCAACAAACGTTATCAAGTCATCAAGGAGA	TGCAGAGACTATTGAGACGAAATCAGTTTTTGATGATCTTCAGGAAACTCTATCAAGTCATCAAGGGGA	69	3024	NC_026149.1_-_XP_020549377.1 Sesamum indicum cultivar Zhongzhi No. 13 linkage group LG5, S_indicum_v1.0, whole genome shotgun sequence	kinesin-like protein KIN-5C
	3383	NC_026156.1 - XP_011095944.1	88.406	69	8	0	1	69	417	485	1.72e-18	89.7	NC_026156.1_-_XP_011095944.1	98	61	61	0	88.41	1	1	TGCAGAGGGAAAAGCATTGGCTGAGGCACAAGGTCTGTTCTTCATCGAAACTTCAGCTCTAGATTCGTC	TGCCGAAGGCAAGGCGTTGGCCGAGGCACAGGGTCTGTTCTTCATCGAAACTTCAGCTCTAGATTCCTC	69	678	NC_026156.1_-_XP_011095944.1 Sesamum indicum cultivar Zhongzhi No. 13 linkage group LG12, S_indicum_v1.0, whole genome shotgun sequence	ras-related protein RABA5a
	3383	NC_026152.1 - XP_020551373.1	88.406	69	8	0	1	69	417	485	1.72e-18	89.7	NC_026152.1_-_XP_020551373.1	98	61	61	0	88.41	1	1	TGCAGAGGGAAAAGCATTGGCTGAGGCACAAGGTCTGTTCTTCATCGAAACTTCAGCTCTAGATTCGTC	TGCAGAAGGCAAGGCCTTGGCAGAGGCACAGGGTCTGTTTTTCATTGAAACTTCAGCTCTAGATTCGTC	69	669	NC_026152.1_-_XP_020551373.1 Sesamum indicum cultivar Zhongzhi No. 13 linkage group LG8, S_indicum_v1.0, whole genome shotgun sequence	ras-related protein RABA5a isoform X2
	3386	NC_026145.1 - XP_011092768.1	92.537	67	5	0	3	69	2317	2383	3.32e-21	99.6	NC_026145.1_-_XP_011092768.1	109	62	62	0	92.54	1	1	CAGAGGGACAAGAGGCAAGAAGCTCTACGCCTAGCACAGTTATCAGCAGAAAAGCCTCATTTTTCTC	CAGAGGGACAAGAGGGAAGAAGCTCTACGCCTAGCACAATTATCGGCAGAGAAGCCACATTTTTCTC	69	3381	NC_026145.1_-_XP_011092768.1 Sesamum indicum cultivar Zhongzhi No. 13 linkage group LG1, S_indicum_v1.0, whole genome shotgun sequence	RAB6A-GEF complex partner protein 1
	3390	NC_026152.1 - XP_020551984.1	83.077	65	11	0	5	69	238	302	5.63e-12	68.9	NC_026152.1_-_XP_020551984.1	75	54	54	0	83.08	1	1	GAGGGACTGTGTTGGACAAGAACCGCAGAGAGGCAGACGTCGCGGATACGGATGGAGTACTTGAG	GAAGGTCTATGTTGGACAAGAACAGCCGAGAGGCAAACATCTCGAATACGAACGGAGTACTTGAG	69	3741	NC_026152.1_-_XP_020551984.1 Sesamum indicum cultivar Zhongzhi No. 13 linkage group LG8, S_indicum_v1.0, whole genome shotgun sequence	putative multidrug resistance protein
	3392	NC_026150.1 - XP_011080858.1	89.231	65	7	0	1	65	2405	2341	2.1e-17	86.9	NC_026150.1_-_XP_011080858.1	95	58	58	0	89.23	1	-1	TGCAGAGGGAGAAGAGACCCCTGCTTTCCTCTGATGAAGTATGTGAGCTCAGCTGGAGCAACCAC	TGCAGCGGGAGGAGAGACCCTTGTTTTCCTCTGATGAAGAATGTAAGCTCAGCTGGAGCAACTAC	69	2418	NC_026150.1_-_XP_011080858.1 Sesamum indicum cultivar Zhongzhi No. 13 linkage group LG6, S_indicum_v1.0, whole genome shotgun sequence	ATP-dependent zinc metalloprotease FTSH 7, chloroplastic
	3392	NC_026150.1 - XP_011080859.1	89.231	65	7	0	1	65	2405	2341	2.1e-17	86.9	NC_026150.1_-_XP_011080859.1	95	58	58	0	89.23	1	-1	TGCAGAGGGAGAAGAGACCCCTGCTTTCCTCTGATGAAGTATGTGAGCTCAGCTGGAGCAACCAC	TGCAGCGGGAGGAGAGACCCTTGTTTTCCTCTGATGAAGAATGTAAGCTCAGCTGGAGCAACTAC	69	2418	NC_026150.1_-_XP_011080859.1 Sesamum indicum cultivar Zhongzhi No. 13 linkage group LG6, S_indicum_v1.0, whole genome shotgun sequence	ATP-dependent zinc metalloprotease FTSH 7, chloroplastic
	3393	NC_026149.1 - XP_011077791.1	90	50	4	1	1	50	329	377	6.86e-11	65.3	NC_026149.1_-_XP_011077791.1	71	45	45	1	90	1	1	TGCAGAGGGAGAAGGCGGAGGTGCAGATGGAGGCAAGGCAGTTTACAGAT	TGCAGAGTGAGAAGGCAGAGATTCAGATGGAGGCAAGGCAGTTTA-AGAT	69	1572	NC_026149.1_-_XP_011077791.1 Sesamum indicum cultivar Zhongzhi No. 13 linkage group LG5, S_indicum_v1.0, whole genome shotgun sequence	myosin-binding protein 7
	3406	NC_026147.1 - XP_011072715.1	87.037	54	7	0	1	54	1568	1515	1.96e-11	67.1	NC_026147.1_-_XP_011072715.1	73	47	47	0	87.04	1	-1	TGCAGAGGGCGACAAGGCTCCGTACCAGGTACAGTTTTGTATACAGACCTAAGA	TGCAGTGGGCGACAAGGCTCAGTGCCAGGTACCGTTTTATACACAGACCTAGGA	69	1743	NC_026147.1_-_XP_011072715.1 Sesamum indicum cultivar Zhongzhi No. 13 linkage group LG3, S_indicum_v1.0, whole genome shotgun sequence	phytoene dehydrogenase, chloroplastic/chromoplastic
	3406	NC_026147.1 - XP_020548367.1	87.037	54	7	0	1	54	1568	1515	1.96e-11	67.1	NC_026147.1_-_XP_020548367.1	73	47	47	0	87.04	1	-1	TGCAGAGGGCGACAAGGCTCCGTACCAGGTACAGTTTTGTATACAGACCTAAGA	TGCAGTGGGCGACAAGGCTCAGTGCCAGGTACCGTTTTATACACAGACCTAGGA	69	1743	NC_026147.1_-_XP_020548367.1 Sesamum indicum cultivar Zhongzhi No. 13 linkage group LG3, S_indicum_v1.0, whole genome shotgun sequence	phytoene dehydrogenase, chloroplastic/chromoplastic
	3420	NC_026152.1 - XP_011088420.1	83.077	65	11	0	1	65	1017	953	5.63e-12	68.9	NC_026152.1_-_XP_011088420.1	75	54	54	0	83.08	1	-1	TGCAGAGGGTATGATCTCAGATCCAAAGTCATTTGATGTAGGGTATCTCAAACGAAGAAGCTTCA	TGCAGCCGGGATGATTTCAGATCCAAAGTCATTTGCCGTAGGGTAACTCCACCTTAGAAGCTTCA	69	1581	NC_026152.1_-_XP_011088420.1 Sesamum indicum cultivar Zhongzhi No. 13 linkage group LG8, S_indicum_v1.0, whole genome shotgun sequence	glucose-1-phosphate adenylyltransferase large subunit 1
	3435	NC_026160.1 - XP_011100368.1	92.157	51	3	1	1	51	580	531	4.62e-13	71.6	NC_026160.1_-_XP_011100368.1	78	47	47	1	92.16	1	-1	TGCAGAGGTACCATTGCAACACCTTGTGATCAAGTCCTTCCAACCTACAAA	TGCATAGGTACCATTGCAACACCTTATGATCAAGTCCCTCCAACCT-CAAA	69	1476	NC_026160.1_-_XP_011100368.1 Sesamum indicum cultivar Zhongzhi No. 13 linkage group LG16, S_indicum_v1.0, whole genome shotgun sequence	probable polyamine oxidase 2
	3436	NC_026160.1 - XP_011100368.1	92.157	51	3	1	1	51	580	531	4.62e-13	71.6	NC_026160.1_-_XP_011100368.1	78	47	47	1	92.16	1	-1	TGCAGAGGTACCATTGCAACACCTTGTGATCAAGTCCTTCCAACCTACAAA	TGCATAGGTACCATTGCAACACCTTATGATCAAGTCCCTCCAACCT-CAAA	69	1476	NC_026160.1_-_XP_011100368.1 Sesamum indicum cultivar Zhongzhi No. 13 linkage group LG16, S_indicum_v1.0, whole genome shotgun sequence	probable polyamine oxidase 2
	3446	NC_026159.1 - XP_011098537.1	89.855	69	7	0	1	69	2744	2676	1.41e-19	94.2	NC_026159.1_-_XP_011098537.1	103	62	62	0	89.86	1	-1	TGCAGAGGTATCTTGTCATAAGTTTCCCTGCGGCTCATCTGGAAGCCGTTTAGGTCAGAGTAAAAAATT	TGCACAGGTATCTTGTCATAAGTTTCCCTACGGCTCATCTGGTAGCCATTCAGATCAGAGTAAAAGATT	69	3513	NC_026159.1_-_XP_011098537.1 Sesamum indicum cultivar Zhongzhi No. 13 linkage group LG15, S_indicum_v1.0, whole genome shotgun sequence	alpha-mannosidase 2
	3458	NC_026147.1 - XP_020548324.1	92.308	65	5	0	5	69	847	911	4.05e-20	96	NC_026147.1_-_XP_020548324.1	105	60	60	0	92.31	1	1	GAGGTGATAACGTCAGCAGAATTTCATCCTACTCATTGCAATACGTTAGCATATAGTAGTTCAAA	GAGGTGATAACATCAGCGGAGTTTCATCCTACTCATTGCAATATGTTAGCATATAGTAGTTCCAA	69	1542	NC_026147.1_-_XP_020548324.1 Sesamum indicum cultivar Zhongzhi No. 13 linkage group LG3, S_indicum_v1.0, whole genome shotgun sequence	serine/threonine protein phosphatase 2A 55 kDa regulatory subunit B beta isoform isoform X2
	3458	NC_026147.1 - XP_020548325.1	92.308	65	5	0	5	69	847	911	4.05e-20	96	NC_026147.1_-_XP_020548325.1	105	60	60	0	92.31	1	1	GAGGTGATAACGTCAGCAGAATTTCATCCTACTCATTGCAATACGTTAGCATATAGTAGTTCAAA	GAGGTGATAACATCAGCGGAGTTTCATCCTACTCATTGCAATATGTTAGCATATAGTAGTTCCAA	69	1542	NC_026147.1_-_XP_020548325.1 Sesamum indicum cultivar Zhongzhi No. 13 linkage group LG3, S_indicum_v1.0, whole genome shotgun sequence	serine/threonine protein phosphatase 2A 55 kDa regulatory subunit B beta isoform isoform X2
	3461	NC_026145.1 - XP_011088968.1	89.231	65	7	0	3	67	208	272	2.1e-17	86.9	NC_026145.1_-_XP_011088968.1	95	58	58	0	89.23	1	1	CAGAGGTGCGGCAAGAGCTGCCGCCTGCGCTGGACGAATTACCTCCGACCCGATCTCAAGCACGG	CAGAGGTGCGGGAAGAGCTGCCGCCTGCGCTGGATCAATTATCTCCGCCCCGACCTCAAGCGCGG	69	1158	NC_026145.1_-_XP_011088968.1 Sesamum indicum cultivar Zhongzhi No. 13 linkage group LG1, S_indicum_v1.0, whole genome shotgun sequence	transcription factor MYB26
	3461	NC_026153.1 - XP_011089146.1	86.885	61	8	0	9	69	223	283	3.79e-14	75.2	NC_026153.1_-_XP_011089146.1	82	53	53	0	86.89	1	1	TGCGGCAAGAGCTGCCGCCTGCGCTGGACGAATTACCTCCGACCCGATCTCAAGCACGGCC	TGCGGCAAGAGCTGCCGCCTCCGCTGGATGAACTACCTCCGCCCCTCTGTCAAGCGCGGCC	69	843	NC_026153.1_-_XP_011089146.1 Sesamum indicum cultivar Zhongzhi No. 13 linkage group LG9, S_indicum_v1.0, whole genome shotgun sequence	transcription repressor MYB5-like
	3463	NC_026148.1 - XP_011076892.1	86.364	66	9	0	2	67	376	441	3.11e-15	79.7	NC_026148.1_-_XP_011076892.1	87	57	57	0	86.36	1	1	GCAGAGGTGGAGAATTTGTCCGAGTGGAATAGCACCTGGTTGAAGCGGATACTTGTGGACTACATG	GCAGAAGTGGACAATTTGTCAGAGTGGAACAGCATCCGCTTGAAGCGGATACTTGTTGACTATATG	69	1230	NC_026148.1_-_XP_011076892.1 Sesamum indicum cultivar Zhongzhi No. 13 linkage group LG4, S_indicum_v1.0, whole genome shotgun sequence	macrophage erythroblast attacher
	3468	NC_026156.1 - XP_020554020.1	90.196	51	5	0	4	54	712	762	1.61e-12	70.7	NC_026156.1_-_XP_020554020.1	77	46	46	0	90.2	1	1	AGAGGTGGTGATGGGGAACTAAGACTTGGAATTCGTAGAGCTACACAAGTT	AGAGGTGGTGATGGAGAACTCAGGCTTGGAATTCGTAGAGCTGCGCAAGTT	69	2190	NC_026156.1_-_XP_020554020.1 Sesamum indicum cultivar Zhongzhi No. 13 linkage group LG12, S_indicum_v1.0, whole genome shotgun sequence	auxin response factor 3 isoform X2
	3468	NC_026156.1 - XP_020554021.1	90.196	51	5	0	4	54	712	762	1.61e-12	70.7	NC_026156.1_-_XP_020554021.1	77	46	46	0	90.2	1	1	AGAGGTGGTGATGGGGAACTAAGACTTGGAATTCGTAGAGCTACACAAGTT	AGAGGTGGTGATGGAGAACTCAGGCTTGGAATTCGTAGAGCTGCGCAAGTT	69	2184	NC_026156.1_-_XP_020554021.1 Sesamum indicum cultivar Zhongzhi No. 13 linkage group LG12, S_indicum_v1.0, whole genome shotgun sequence	auxin response factor 3 isoform X2
	3470	NC_026152.1 - XP_011086690.1	87.692	65	8	0	5	69	745	809	2.56e-16	82.4	NC_026152.1_-_XP_011086690.1	90	57	57	0	87.69	1	1	GAGGTGTTGCTGACAAAGATCACACCACTGAGAGAGCTGGTGGAAGTGATTGAAGGCGGAGATGC	GAGGTGTTGCTCACGAAGATCACACCATTAAGAGAGCTGGTCGAAGTTGTTGAAGGCGGGGATGC	69	822	NC_026152.1_-_XP_011086690.1 Sesamum indicum cultivar Zhongzhi No. 13 linkage group LG8, S_indicum_v1.0, whole genome shotgun sequence	proteasome subunit beta type-7-A
	3471	NC_026159.1 - XP_011099049.1	95.161	62	3	0	7	68	10334	10273	3.32e-21	99.6	NC_026159.1_-_XP_011099049.1	109	59	59	0	95.16	1	-1	GGTTCAAGAGATAATGCTTGAAGATTTTCGTAGAAAGAATCCAACTCAATCATAAAGTTACA	GGTTCAAGGGATAATGCTTGAAGGTTTTCATAGAAAGAATCCAACTCAATCATAAAGTTACA	69	15318	NC_026159.1_-_XP_011099049.1 Sesamum indicum cultivar Zhongzhi No. 13 linkage group LG15, S_indicum_v1.0, whole genome shotgun sequence	LOW QUALITY PROTEIN: auxin transport protein BIG
	3472	NC_026155.1 - XP_011095216.1	89.062	64	7	0	1	64	605	668	7.32e-17	85.1	NC_026155.1_-_XP_011095216.1	93	57	57	0	89.06	1	1	TGCAGAGGTTCAGAGAATGCGAGCTCATCCATGGCCGGTGGGCCATGCTCGCCACCCTCGGAGC	TGCAGAGGTTCAGAGAATGCGAGCTCATCCATGGCAGATGGGCAATGCTCGCTACTCTTGGTGC	69	1083	NC_026155.1_-_XP_011095216.1 Sesamum indicum cultivar Zhongzhi No. 13 linkage group LG11, S_indicum_v1.0, whole genome shotgun sequence	chlorophyll a-b binding protein CP29.1, chloroplastic
	3475	NC_026155.1 - XP_011095216.1	86.567	67	9	0	1	67	605	671	8.92e-16	81.5	NC_026155.1_-_XP_011095216.1	89	58	58	0	86.57	1	1	TGCAGAGGTTTAGGGAATGCGAGCTCATCCATGGCAGGTGGGCCATGCTCGCCACCCTCGGCGCCTT	TGCAGAGGTTCAGAGAATGCGAGCTCATCCATGGCAGATGGGCAATGCTCGCTACTCTTGGTGCGTT	69	1083	NC_026155.1_-_XP_011095216.1 Sesamum indicum cultivar Zhongzhi No. 13 linkage group LG11, S_indicum_v1.0, whole genome shotgun sequence	chlorophyll a-b binding protein CP29.1, chloroplastic
	3477	NC_026152.1 - XP_020551715.1	84.058	69	11	0	1	69	755	687	3.79e-14	76.1	NC_026152.1_-_XP_020551715.1	83	58	58	0	84.06	1	-1	TGCAGAGGTTTCATAACAAATCCCAAAATAGCAAAAGGAAGCATGAAAAGAGCCTCCACCCAGAATGCC	TGCAATGGTTTCATCACAAAGCCTAAAATAGCAAAAGGGAGCATCAAAATTGCCTCTACCCAGAACGCC	69	1551	NC_026152.1_-_XP_020551715.1 Sesamum indicum cultivar Zhongzhi No. 13 linkage group LG8, S_indicum_v1.0, whole genome shotgun sequence	probable sphingolipid transporter spinster homolog 2
	3498	NC_026160.1 - XP_011100202.1	91.176	68	6	0	2	69	190	257	1.16e-20	96.9	NC_026160.1_-_XP_011100202.1	106	62	62	0	91.18	1	1	GCAGAGTACGAAGGCAAACGTGATCCGCAGAAACTGGAAGAGCTCGGGCGAGTTCTCACGAGTTTGGA	GCAGAGTATGAAGGGAAACGTGACCCGCAGAAACTGGAAGAGCTCGGGAGAGTTCTCACTAGTTTAGA	69	2901	NC_026160.1_-_XP_011100202.1 Sesamum indicum cultivar Zhongzhi No. 13 linkage group LG16, S_indicum_v1.0, whole genome shotgun sequence	phosphoenolpyruvate carboxylase 1
	3499	NC_026149.1 - XP_011077981.1	86.765	68	9	0	1	68	980	913	2.56e-16	83.3	NC_026149.1_-_XP_011077981.1	91	59	59	0	86.76	1	-1	TGCAGAGTACTGTAAAGGCCAATTCTCCCAACTAAAAACAAGCGTTTCTGAGTCCCGGCTACCAAATA	TGAAGTGTACTATAAAGGCCAATTCTCCCGACTAGAAACAGGCGTTTCTGGGTCCCGGCTATTAAATA	69	1260	NC_026149.1_-_XP_011077981.1 Sesamum indicum cultivar Zhongzhi No. 13 linkage group LG5, S_indicum_v1.0, whole genome shotgun sequence	F-box/kelch-repeat protein At5g15710-like isoform X2
	3499	NC_026149.1 - XP_020549733.1	86.765	68	9	0	1	68	980	913	2.56e-16	83.3	NC_026149.1_-_XP_020549733.1	91	59	59	0	86.76	1	-1	TGCAGAGTACTGTAAAGGCCAATTCTCCCAACTAAAAACAAGCGTTTCTGAGTCCCGGCTACCAAATA	TGAAGTGTACTATAAAGGCCAATTCTCCCGACTAGAAACAGGCGTTTCTGGGTCCCGGCTATTAAATA	69	1242	NC_026149.1_-_XP_020549733.1 Sesamum indicum cultivar Zhongzhi No. 13 linkage group LG5, S_indicum_v1.0, whole genome shotgun sequence	F-box/kelch-repeat protein At5g15710-like isoform X2
	3527	NC_026150.1 - XP_011082015.1	87.879	66	8	0	1	66	231	296	7.32e-17	84.2	NC_026150.1_-_XP_011082015.1	92	58	58	0	87.88	1	1	TGCAGAGTATGTCAAACAAAACCTTTTCAGCAACCTGATTAGGCATCCAAAATTTATTTCTGATAC	TGCAGAATATGTCAAACAAAACCTCTTCAGTAATCTCATCAGGCACCCAAAGTTTATTTCTGATAC	69	882	NC_026150.1_-_XP_011082015.1 Sesamum indicum cultivar Zhongzhi No. 13 linkage group LG6, S_indicum_v1.0, whole genome shotgun sequence	probable protein phosphatase 2C 59
	3527	NC_026150.1 - XP_011082014.1	87.879	66	8	0	1	66	231	296	7.32e-17	84.2	NC_026150.1_-_XP_011082014.1	92	58	58	0	87.88	1	1	TGCAGAGTATGTCAAACAAAACCTTTTCAGCAACCTGATTAGGCATCCAAAATTTATTTCTGATAC	TGCAGAATATGTCAAACAAAACCTCTTCAGTAATCTCATCAGGCACCCAAAGTTTATTTCTGATAC	69	882	NC_026150.1_-_XP_011082014.1 Sesamum indicum cultivar Zhongzhi No. 13 linkage group LG6, S_indicum_v1.0, whole genome shotgun sequence	probable protein phosphatase 2C 59
	3538	NC_026156.1 - XP_011095521.1	86.154	65	9	0	1	65	4179	4115	1.09e-14	77.9	NC_026156.1_-_XP_011095521.1	85	56	56	0	86.15	1	-1	TGCAGAGTCAAGCTTCTCTGGCTTTTTCCTGATTTCATCACCAAGCTGGCATTTTTCAAGAGCCT	TGCAGAATCGAGCTTCCCTACCTTTTTCCGGACCTCATCACCAAGCTGGCATTTATCAAGAGCCT	69	4551	NC_026156.1_-_XP_011095521.1 Sesamum indicum cultivar Zhongzhi No. 13 linkage group LG12, S_indicum_v1.0, whole genome shotgun sequence	ABC transporter C family member 3 isoform X2
	3538	NC_026156.1 - XP_011095523.1	84.615	65	10	0	1	65	4179	4115	1.32e-13	73.4	NC_026156.1_-_XP_011095523.1	80	55	55	0	84.62	1	-1	TGCAGAGTCAAGCTTCTCTGGCTTTTTCCTGATTTCATCACCAAGCTGGCATTTTTCAAGAGCCT	TGCAGAATCGAGCTTTCCTGTCTTTCTCCGGACCTCATCACCAAGCTGGCATTTATCAAGAGCCT	69	4557	NC_026156.1_-_XP_011095523.1 Sesamum indicum cultivar Zhongzhi No. 13 linkage group LG12, S_indicum_v1.0, whole genome shotgun sequence	ABC transporter C family member 3
	3560	NC_026152.1 - XP_020551877.1	85.294	68	10	0	2	69	643	710	3.11e-15	78.8	NC_026152.1_-_XP_020551877.1	86	58	58	0	85.29	1	1	GCAGAGTCGTCAAGCAGTGCAGCTTCAAAAGATGATACATCATCATCCAGGGGTATTGTGGCGAATGG	GCAGATTCATCTAGCAGTGCAGCTTCAAAAGATGATGGGTCATCGTCTAGGGGGATTGTGGTGAATGG	69	6153	NC_026152.1_-_XP_020551877.1 Sesamum indicum cultivar Zhongzhi No. 13 linkage group LG8, S_indicum_v1.0, whole genome shotgun sequence	phosphatidylinositol 4-kinase alpha 1 isoform X2
	3560	NC_026152.1 - XP_011088367.1	85.294	68	10	0	2	69	643	710	3.11e-15	78.8	NC_026152.1_-_XP_011088367.1	86	58	58	0	85.29	1	1	GCAGAGTCGTCAAGCAGTGCAGCTTCAAAAGATGATACATCATCATCCAGGGGTATTGTGGCGAATGG	GCAGATTCATCTAGCAGTGCAGCTTCAAAAGATGATGGGTCATCGTCTAGGGGGATTGTGGTGAATGG	69	6069	NC_026152.1_-_XP_011088367.1 Sesamum indicum cultivar Zhongzhi No. 13 linkage group LG8, S_indicum_v1.0, whole genome shotgun sequence	phosphatidylinositol 4-kinase alpha 1 isoform X2
	3561	NC_026152.1 - XP_020551877.1	85.294	68	10	0	2	69	643	710	3.11e-15	78.8	NC_026152.1_-_XP_020551877.1	86	58	58	0	85.29	1	1	GCAGAGTCGTCAAGCAGTGCAGCTTCAAAAGATGATACATCATCATCCAGGGGTATTGTGGCGAATGG	GCAGATTCATCTAGCAGTGCAGCTTCAAAAGATGATGGGTCATCGTCTAGGGGGATTGTGGTGAATGG	69	6153	NC_026152.1_-_XP_020551877.1 Sesamum indicum cultivar Zhongzhi No. 13 linkage group LG8, S_indicum_v1.0, whole genome shotgun sequence	phosphatidylinositol 4-kinase alpha 1 isoform X2
	3561	NC_026152.1 - XP_011088367.1	85.294	68	10	0	2	69	643	710	3.11e-15	78.8	NC_026152.1_-_XP_011088367.1	86	58	58	0	85.29	1	1	GCAGAGTCGTCAAGCAGTGCAGCTTCAAAAGATGATACATCATCATCCAGGGGTATTGTGGCGAATGG	GCAGATTCATCTAGCAGTGCAGCTTCAAAAGATGATGGGTCATCGTCTAGGGGGATTGTGGTGAATGG	69	6069	NC_026152.1_-_XP_011088367.1 Sesamum indicum cultivar Zhongzhi No. 13 linkage group LG8, S_indicum_v1.0, whole genome shotgun sequence	phosphatidylinositol 4-kinase alpha 1 isoform X2
	3574	NC_026154.1 - XP_011092347.1	87.692	65	8	0	5	69	2099	2035	2.56e-16	82.4	NC_026154.1_-_XP_011092347.1	90	57	57	0	87.69	1	-1	GAGTCTGTCTCCGACTGCACGATTTTGTGATTTGCCTGAGCCGGCATGTTTACTCCTAATTGCAC	GAGGCCGTCTCTGCCTGCATAAGTTTGTGATTTGCCTGAGCTGGCATGTTTACTCCTAATTGCAC	69	2304	NC_026154.1_-_XP_011092347.1 Sesamum indicum cultivar Zhongzhi No. 13 linkage group LG10, S_indicum_v1.0, whole genome shotgun sequence	phosphatidylinositol 4-phosphate 5-kinase 8-like
	3574	NC_026154.1 - XP_020552709.1	87.692	65	8	0	5	69	2099	2035	2.56e-16	82.4	NC_026154.1_-_XP_020552709.1	90	57	57	0	87.69	1	-1	GAGTCTGTCTCCGACTGCACGATTTTGTGATTTGCCTGAGCCGGCATGTTTACTCCTAATTGCAC	GAGGCCGTCTCTGCCTGCATAAGTTTGTGATTTGCCTGAGCTGGCATGTTTACTCCTAATTGCAC	69	2304	NC_026154.1_-_XP_020552709.1 Sesamum indicum cultivar Zhongzhi No. 13 linkage group LG10, S_indicum_v1.0, whole genome shotgun sequence	phosphatidylinositol 4-phosphate 5-kinase 8-like
	3575	NC_026154.1 - XP_011092347.1	87.692	65	8	0	5	69	2099	2035	2.56e-16	82.4	NC_026154.1_-_XP_011092347.1	90	57	57	0	87.69	1	-1	GAGTCTGTCTCCGACTGCACGATTTTGTGATTTGCCTGAGCCGGCATGTTTACTCCTAATTGCAC	GAGGCCGTCTCTGCCTGCATAAGTTTGTGATTTGCCTGAGCTGGCATGTTTACTCCTAATTGCAC	69	2304	NC_026154.1_-_XP_011092347.1 Sesamum indicum cultivar Zhongzhi No. 13 linkage group LG10, S_indicum_v1.0, whole genome shotgun sequence	phosphatidylinositol 4-phosphate 5-kinase 8-like
	3575	NC_026154.1 - XP_020552709.1	87.692	65	8	0	5	69	2099	2035	2.56e-16	82.4	NC_026154.1_-_XP_020552709.1	90	57	57	0	87.69	1	-1	GAGTCTGTCTCCGACTGCACGATTTTGTGATTTGCCTGAGCCGGCATGTTTACTCCTAATTGCAC	GAGGCCGTCTCTGCCTGCATAAGTTTGTGATTTGCCTGAGCTGGCATGTTTACTCCTAATTGCAC	69	2304	NC_026154.1_-_XP_020552709.1 Sesamum indicum cultivar Zhongzhi No. 13 linkage group LG10, S_indicum_v1.0, whole genome shotgun sequence	phosphatidylinositol 4-phosphate 5-kinase 8-like
	3578	NC_026147.1 - XP_011073802.1	88.406	69	8	0	1	69	1194	1126	1.72e-18	89.7	NC_026147.1_-_XP_011073802.1	98	61	61	0	88.41	1	-1	TGCAGAGTGAAGCACCGCCACGTCAACTTTCTCTCTTGGCAGGTACAAAAATTCACCCCCTTCAATTTT	TGCAGAGTGAAGCACTGCAATGTCAACTTTCTCTCTCGGAAGATACAAAAACTCACCCCCTTCGATTTT	69	1245	NC_026147.1_-_XP_011073802.1 Sesamum indicum cultivar Zhongzhi No. 13 linkage group LG3, S_indicum_v1.0, whole genome shotgun sequence	chromatin assembly factor 1 subunit A
	3579	NC_026147.1 - XP_011074097.1	87.5	56	7	0	14	69	1	56	1.61e-12	70.7	NC_026147.1_-_XP_011074097.1	77	49	49	0	87.5	1	1	ATGGAGAAAAAGCAGAAGAAGTTCCTTACCGTGGCACCATTCGAGTGTGCTTGGCA	ATGGAGAAGAAGCAGAAGAAATTCCTTACTGTAGCGCCATTTCAGTGTGCTTGGCA	69	2385	NC_026147.1_-_XP_011074097.1 Sesamum indicum cultivar Zhongzhi No. 13 linkage group LG3, S_indicum_v1.0, whole genome shotgun sequence	BTB/POZ domain-containing protein At2g30600
	3589	NC_026145.1 - XP_020552576.1	89.855	69	7	0	1	69	83	151	1.41e-19	94.2	NC_026145.1_-_XP_020552576.1	103	62	62	0	89.86	1	1	TGCAGAGTGATTGCTTTCGGACATGCTACCTTTCTGATGTAAACATGGTCATTTCAGCACCAACTGGAA	TGCAGAGTGAATGCTTTTCCACATGCTTCCTTTCCGATGTAAACATGGTCATTTCTGCACCAACTGGAA	69	3519	NC_026145.1_-_XP_020552576.1 Sesamum indicum cultivar Zhongzhi No. 13 linkage group LG1, S_indicum_v1.0, whole genome shotgun sequence	DExH-box ATP-dependent RNA helicase DExH17
	3603	NC_026147.1 - XP_011074323.1	83.333	60	10	0	8	67	1488	1547	6.86e-11	64.4	NC_026147.1_-_XP_011074323.1	70	50	50	0	83.33	1	1	TGCGTCGGGTATAATCTTCCCGATCATCAAGGCTGAAGGAGTGAGGCAGATGTTCTTTCC	TGCATCAGGTATAATATTTCCTATCATCAAGGCAGAAGGGGTCAGGCAAATGTTCTTCCC	69	1590	NC_026147.1_-_XP_011074323.1 Sesamum indicum cultivar Zhongzhi No. 13 linkage group LG3, S_indicum_v1.0, whole genome shotgun sequence	squalene epoxidase 1
	3608	NC_026150.1 - XP_011081644.1	92.754	69	5	0	1	69	897	829	2.73e-22	103	NC_026150.1_-_XP_011081644.1	113	64	64	0	92.75	1	-1	TGCAGAGTGCTTTTCATCATAAAGCAAAGCTGTTTCTCGGTATGTAACGAGACCATAATTCTCCATAGC	TGCAGAGTGCTTATCATCATAAAGCAAAGCTGTTTCGCGATATGTAACAAGACCATAATTCTCCATGGC	69	2637	NC_026150.1_-_XP_011081644.1 Sesamum indicum cultivar Zhongzhi No. 13 linkage group LG6, S_indicum_v1.0, whole genome shotgun sequence	aminopeptidase M1
	3624	NC_026153.1 - XP_011088787.1	81.818	66	12	0	1	66	912	977	1.96e-11	66.2	NC_026153.1_-_XP_011088787.1	72	54	54	0	81.82	1	1	TGCAGAGTGTGATGTCTCCATCCGGCCCGGATGGTTCTGGCACGCGTCCGAATCGCCCAAATCGGC	TGCAGAATGTGACGTCTCCATCCGACCCGGATGGTTTTGGCATGCATCAGAAGTTCCAAAATCCGC	69	1635	NC_026153.1_-_XP_011088787.1 Sesamum indicum cultivar Zhongzhi No. 13 linkage group LG9, S_indicum_v1.0, whole genome shotgun sequence	alpha-L-fucosidase 1 isoform X2
	3624	NC_026153.1 - XP_020552377.1	81.818	66	12	0	1	66	813	878	1.96e-11	66.2	NC_026153.1_-_XP_020552377.1	72	54	54	0	81.82	1	1	TGCAGAGTGTGATGTCTCCATCCGGCCCGGATGGTTCTGGCACGCGTCCGAATCGCCCAAATCGGC	TGCAGAATGTGACGTCTCCATCCGACCCGGATGGTTTTGGCATGCATCAGAAGTTCCAAAATCCGC	69	1536	NC_026153.1_-_XP_020552377.1 Sesamum indicum cultivar Zhongzhi No. 13 linkage group LG9, S_indicum_v1.0, whole genome shotgun sequence	alpha-L-fucosidase 1 isoform X2
	3626	NC_026156.1 - XP_011096260.1	84.507	71	8	1	2	69	5351	5281	1.09e-14	77.9	NC_026156.1_-_XP_011096260.1	85	60	60	3	84.51	1	-1	GCAGAGTGTGGTGCAG---GTGCAGGGTTGTTCCCAGTCGAGTCATTCCAGTGAGTTTGCCCTACAGGGCC	GCAGAGTGTGTTGCAGCAGGCGCTGGGTTGTTGGCAGTCGAGTCACTCCAGTGAGTTTGCCCAACAGGCCC	69	6087	NC_026156.1_-_XP_011096260.1 Sesamum indicum cultivar Zhongzhi No. 13 linkage group LG12, S_indicum_v1.0, whole genome shotgun sequence	protein MOR1 isoform X2
	3626	NC_026156.1 - XP_011096261.1	84.507	71	8	1	2	69	5351	5281	1.09e-14	77.9	NC_026156.1_-_XP_011096261.1	85	60	60	3	84.51	1	-1	GCAGAGTGTGGTGCAG---GTGCAGGGTTGTTCCCAGTCGAGTCATTCCAGTGAGTTTGCCCTACAGGGCC	GCAGAGTGTGTTGCAGCAGGCGCTGGGTTGTTGGCAGTCGAGTCACTCCAGTGAGTTTGCCCAACAGGCCC	69	6084	NC_026156.1_-_XP_011096261.1 Sesamum indicum cultivar Zhongzhi No. 13 linkage group LG12, S_indicum_v1.0, whole genome shotgun sequence	protein MOR1 isoform X2
	3632	NC_026148.1 - XP_011076073.1	88.406	69	8	0	1	69	74	6	1.72e-18	89.7	NC_026148.1_-_XP_011076073.1	98	61	61	0	88.41	1	-1	TGCAGAGTGTTGGTGAATCCTCTAAATACGAGAAATTCTCTCACTAATTCTTCCGCGAATTTCATCTTC	TGGAGAGTGTTGGTGAATCCTCTGAACACGAGAAATTCTCTAACGAGCTCCTCCGCGAATTTCATCTTC	69	1848	NC_026148.1_-_XP_011076073.1 Sesamum indicum cultivar Zhongzhi No. 13 linkage group LG4, S_indicum_v1.0, whole genome shotgun sequence	WD repeat-containing protein 91 homolog isoform X2
	3632	NC_026148.1 - XP_011076074.1	88.406	69	8	0	1	69	74	6	1.72e-18	89.7	NC_026148.1_-_XP_011076074.1	98	61	61	0	88.41	1	-1	TGCAGAGTGTTGGTGAATCCTCTAAATACGAGAAATTCTCTCACTAATTCTTCCGCGAATTTCATCTTC	TGGAGAGTGTTGGTGAATCCTCTGAACACGAGAAATTCTCTAACGAGCTCCTCCGCGAATTTCATCTTC	69	1824	NC_026148.1_-_XP_011076074.1 Sesamum indicum cultivar Zhongzhi No. 13 linkage group LG4, S_indicum_v1.0, whole genome shotgun sequence	WD repeat-containing protein 91 homolog isoform X2
	3634	NC_026145.1 - XP_011069997.1	89.394	66	7	0	4	69	413	478	6.01e-18	88.7	NC_026145.1_-_XP_011069997.1	97	59	59	0	89.39	1	1	AGAGTGTTTTAGACGGTTATAATGGAACAGTAATGGCATATGGGCAGACGGGTACAGGGAAAACCT	AGAGTGTTCTGGAGGGTTACAATGGAACGGTGATGGCATATGGGCAGACTGGTACAGGGAAAACCT	69	2760	NC_026145.1_-_XP_011069997.1 Sesamum indicum cultivar Zhongzhi No. 13 linkage group LG1, S_indicum_v1.0, whole genome shotgun sequence	kinesin-like protein KIN-UB isoform X2
	3634	NC_026145.1 - XP_011070006.1	89.394	66	7	0	4	69	413	478	6.01e-18	88.7	NC_026145.1_-_XP_011070006.1	97	59	59	0	89.39	1	1	AGAGTGTTTTAGACGGTTATAATGGAACAGTAATGGCATATGGGCAGACGGGTACAGGGAAAACCT	AGAGTGTTCTGGAGGGTTACAATGGAACGGTGATGGCATATGGGCAGACTGGTACAGGGAAAACCT	69	2757	NC_026145.1_-_XP_011070006.1 Sesamum indicum cultivar Zhongzhi No. 13 linkage group LG1, S_indicum_v1.0, whole genome shotgun sequence	kinesin-like protein KIN-UB isoform X2
	3638	NC_026152.1 - XP_020551536.1	88.235	68	8	0	1	68	2165	2098	6.01e-18	87.8	NC_026152.1_-_XP_020551536.1	96	60	60	0	88.24	1	-1	TGCAGAGTTACGTCAGGAGGTACAGCATCTGACTCACGTTTCAAATCAAAAGGACGACCAGAATCCCA	TGCAGAGTCACATCAGGAGGTACAGCATCAGACTCCCTTTTCAGATCAAAAGGACGACTAGAGTCCCA	69	6429	NC_026152.1_-_XP_020551536.1 Sesamum indicum cultivar Zhongzhi No. 13 linkage group LG8, S_indicum_v1.0, whole genome shotgun sequence	LOW QUALITY PROTEIN: protein furry homolog-like
	3641	NC_026154.1 - XP_011091149.1	85.507	69	10	0	1	69	897	965	8.92e-16	80.6	NC_026154.1_-_XP_011091149.1	88	59	59	0	85.51	1	1	TGCAGAGTTAGCAGTTGCTGTGGAGAAACATGTTTTAGAATCCGGATCGATTGATACTGTTGGAACAGT	TGCAGAGCTTGCACTTGCGGTTGAGAAACATGTATTAGACTCGGGATCCATTGACACTGTTGGAACAGT	69	1410	NC_026154.1_-_XP_011091149.1 Sesamum indicum cultivar Zhongzhi No. 13 linkage group LG10, S_indicum_v1.0, whole genome shotgun sequence	ureidoglycolate hydrolase
	3642	NC_026159.1 - XP_011099496.1	94.203	69	4	0	1	69	236	168	6.42e-24	107	NC_026159.1_-_XP_011099496.1	118	65	65	0	94.2	1	-1	TGCAGAGTTATAGTTTCTCCAAGATGACTGAATATCACACAAGGCAAGAACAAAGCGAAAACAAGCTTG	TGCAGAGTTATAGTTTCTCCAAGATGAATGAAGATCAGACAAGGCAAGAACAAAGCAAAAACAAGCTTG	69	1368	NC_026159.1_-_XP_011099496.1 Sesamum indicum cultivar Zhongzhi No. 13 linkage group LG15, S_indicum_v1.0, whole genome shotgun sequence	protein PIN-LIKES 2-like
	3642	NC_026159.1 - XP_011099494.1	94.203	69	4	0	1	69	236	168	6.42e-24	107	NC_026159.1_-_XP_011099494.1	118	65	65	0	94.2	1	-1	TGCAGAGTTATAGTTTCTCCAAGATGACTGAATATCACACAAGGCAAGAACAAAGCGAAAACAAGCTTG	TGCAGAGTTATAGTTTCTCCAAGATGAATGAAGATCAGACAAGGCAAGAACAAAGCAAAAACAAGCTTG	69	1368	NC_026159.1_-_XP_011099494.1 Sesamum indicum cultivar Zhongzhi No. 13 linkage group LG15, S_indicum_v1.0, whole genome shotgun sequence	protein PIN-LIKES 2-like
	3643	NC_026147.1 - XP_011073104.1	84.615	65	10	0	5	69	1200	1264	1.32e-13	73.4	NC_026147.1_-_XP_011073104.1	80	55	55	0	84.62	1	1	GAGTTATGCAGCTATTCTCTATCTTAGAATTCCTCCGGGATTTCGAATCATTCTGCGTGGTCAAG	GAGTTATGCAGCTATTCTCTACCTCAGAATTCCTCCTAACTTTCGAATTATTTTGCGCGGTGAAG	69	2424	NC_026147.1_-_XP_011073104.1 Sesamum indicum cultivar Zhongzhi No. 13 linkage group LG3, S_indicum_v1.0, whole genome shotgun sequence	protein MICRORCHIDIA 7-like
	3644	NC_026147.1 - XP_011073104.1	84.615	65	10	0	5	69	1200	1264	1.32e-13	73.4	NC_026147.1_-_XP_011073104.1	80	55	55	0	84.62	1	1	GAGTTATGCAGCTATTCTCTATCTTAGAATTCCTCCGGGATTTCGAATCATTCTGCGTGGTCAAG	GAGTTATGCAGCTATTCTCTACCTCAGAATTCCTCCTAACTTTCGAATTATTTTGCGCGGTGAAG	69	2424	NC_026147.1_-_XP_011073104.1 Sesamum indicum cultivar Zhongzhi No. 13 linkage group LG3, S_indicum_v1.0, whole genome shotgun sequence	protein MICRORCHIDIA 7-like
	3645	NC_026147.1 - XP_011073104.1	84.615	65	10	0	5	69	1200	1264	1.32e-13	73.4	NC_026147.1_-_XP_011073104.1	80	55	55	0	84.62	1	1	GAGTTATGCAGCTATTCTCTATCTTAGAATTCCTCCGGGATTTCGAATCATTCTGCGTGGTCAAG	GAGTTATGCAGCTATTCTCTACCTCAGAATTCCTCCTAACTTTCGAATTATTTTGCGCGGTGAAG	69	2424	NC_026147.1_-_XP_011073104.1 Sesamum indicum cultivar Zhongzhi No. 13 linkage group LG3, S_indicum_v1.0, whole genome shotgun sequence	protein MICRORCHIDIA 7-like
	3652	NC_026155.1 - XP_020553600.1	81.159	69	13	0	1	69	1179	1247	1.96e-11	67.1	NC_026155.1_-_XP_020553600.1	73	56	56	0	81.16	1	1	TGCAGAGTTCATGCTAGACCTAGCAAACGGTAACGTGACAGACATCTCCGTCCCCTCAGAGCTGGAGGA	TGCAGAATTCATGCTTGACCTAGCAAATGGAAATGTAACAGATATTTCTGTGCCATCAGAACTAGAGGA	69	2223	NC_026155.1_-_XP_020553600.1 Sesamum indicum cultivar Zhongzhi No. 13 linkage group LG11, S_indicum_v1.0, whole genome shotgun sequence	ABC transporter G family member 22-like isoform X7
	3652	NC_026155.1 - XP_020553599.1	81.159	69	13	0	1	69	1179	1247	1.96e-11	67.1	NC_026155.1_-_XP_020553599.1	73	56	56	0	81.16	1	1	TGCAGAGTTCATGCTAGACCTAGCAAACGGTAACGTGACAGACATCTCCGTCCCCTCAGAGCTGGAGGA	TGCAGAATTCATGCTTGACCTAGCAAATGGAAATGTAACAGATATTTCTGTGCCATCAGAACTAGAGGA	69	2223	NC_026155.1_-_XP_020553599.1 Sesamum indicum cultivar Zhongzhi No. 13 linkage group LG11, S_indicum_v1.0, whole genome shotgun sequence	ABC transporter G family member 22-like isoform X7
	3656	NC_026151.1 - XP_011084269.1	86.957	69	9	0	1	69	1038	1106	7.32e-17	85.1	NC_026151.1_-_XP_011084269.1	93	60	60	0	86.96	1	1	TGCAGAGTTCCAGCGTTGCATGGTACCGTTGTTTAGACAAATTGGACGAAGCCTCACTAGCTCGCATTT	TGCAGAGTTCCAGCGCTGCATGGTTCCCCTTTTTAGACAAATTGGAAGAAGCCTCAATAGCCCACATTT	69	1434	NC_026151.1_-_XP_011084269.1 Sesamum indicum cultivar Zhongzhi No. 13 linkage group LG7, S_indicum_v1.0, whole genome shotgun sequence	serine/threonine protein phosphatase 2A 57 kDa regulatory subunit B' beta isoform
	3656	NC_026155.1 - XP_011094501.1	82.609	69	12	0	1	69	1059	1127	4.62e-13	71.6	NC_026155.1_-_XP_011094501.1	78	57	57	0	82.61	1	1	TGCAGAGTTCCAGCGTTGCATGGTACCGTTGTTTAGACAAATTGGACGAAGCCTCACTAGCTCGCATTT	TGCAGAGTTTCAGCGCTGCATGGTTCCTCTATTCAGACAAATTGGACGAAGCCTCAACAGTCCACATTT	69	1458	NC_026155.1_-_XP_011094501.1 Sesamum indicum cultivar Zhongzhi No. 13 linkage group LG11, S_indicum_v1.0, whole genome shotgun sequence	serine/threonine protein phosphatase 2A 57 kDa regulatory subunit B' beta isoform
	3667	NC_026146.1 - XP_011070855.1	89.855	69	7	0	1	69	222	290	1.41e-19	94.2	NC_026146.1_-_XP_011070855.1	103	62	62	0	89.86	1	1	TGCAGAGTTGAGTAAGATGACACTTGAGGAAGCCCTATCACTAGCTCGAGCATTCAGTCATTATCTAAA	TGCAGAGTTGTCAAAAATGACACTTGAGGAAGCCCAATCACTTGCACGAGCATTCAGTCATTATCTAAA	69	3183	NC_026146.1_-_XP_011070855.1 Sesamum indicum cultivar Zhongzhi No. 13 linkage group LG2, S_indicum_v1.0, whole genome shotgun sequence	phosphoenolpyruvate carboxylase 4
	3668	NC_026155.1 - XP_011094989.1	91.176	68	6	0	2	69	1136	1069	1.16e-20	96.9	NC_026155.1_-_XP_011094989.1	106	62	62	0	91.18	1	-1	GCAGAGTTGATAGGGCCAAAGAATGGGAAGATGATGGCCAAGAACCAAATCGGTATCACCACAGGCAG	GCTGAGTTGATAGGCCCAAAAAATGGGAAGATAATGGCCAAGAACCATATCGGTATCACCACTGGCAG	69	1452	NC_026155.1_-_XP_011094989.1 Sesamum indicum cultivar Zhongzhi No. 13 linkage group LG11, S_indicum_v1.0, whole genome shotgun sequence	auxin transporter-like protein 2
	3668	NC_026149.1 - XP_011077572.1	89.706	68	7	0	2	69	1142	1075	4.93e-19	92.4	NC_026149.1_-_XP_011077572.1	101	61	61	0	89.71	1	-1	GCAGAGTTGATAGGGCCAAAGAATGGGAAGATGATGGCCAAGAACCAAATCGGTATCACCACAGGCAG	GCGGAGTTGATGGGGCCAAAGAATGGGAAGATTATGGCCAAGAACCATATTGGTATCACCACCGGTAG	69	1455	NC_026149.1_-_XP_011077572.1 Sesamum indicum cultivar Zhongzhi No. 13 linkage group LG5, S_indicum_v1.0, whole genome shotgun sequence	auxin transporter-like protein 2
	3671	NC_026150.1 - XP_011080174.1	85.075	67	10	0	3	69	32	98	1.09e-14	77	NC_026150.1_-_XP_011080174.1	84	57	57	0	85.07	1	1	CAGAGTTGATTGACCGGTGTATCGGGTCGAAGATATGGGTGATTATGAAGGGCGACAAGGAATTGGT	CAGAGCTAATTGATAGGTGCATCGGGTCGAAAATATGGGTGATAATGAAAGGAGACAAGGAACTGGT	69	264	NC_026150.1_-_XP_011080174.1 Sesamum indicum cultivar Zhongzhi No. 13 linkage group LG6, S_indicum_v1.0, whole genome shotgun sequence	sm-like protein LSM5
	3675	NC_026152.1 - XP_011088215.1	84.058	69	11	0	1	69	1073	1141	3.79e-14	76.1	NC_026152.1_-_XP_011088215.1	83	58	58	0	84.06	1	1	TGCAGAGTTGCCCGGCGGCTTCGAATCTTTGCTTGAAATCGCAGAAACCCGCTTCGATTTGCCGGCAAG	TGGAGAGTTGCCCGAGTTCTTCGGAGCTTTGCTTGAAACCCCAGAAACCGGCTTCGATTTGCCAGCAAG	69	1167	NC_026152.1_-_XP_011088215.1 Sesamum indicum cultivar Zhongzhi No. 13 linkage group LG8, S_indicum_v1.0, whole genome shotgun sequence	probable inactive leucine-rich repeat receptor kinase XIAO
	3677	NC_026145.1 - XP_011082042.1	85.507	69	10	0	1	69	1759	1691	8.92e-16	80.6	NC_026145.1_-_XP_011082042.1	88	59	59	0	85.51	1	-1	TGCAGAGTTGGAAGTAGCAGAGCACGATTGTTATCTCCGCACACGTGACGAGGAGGATGATGAAGACGA	TGCATAATTGGAAATAGCAGAGCACGACTGCAATCTCGGCACAGGTGATGATGAGGATGATGAAGACGA	69	2004	NC_026145.1_-_XP_011082042.1 Sesamum indicum cultivar Zhongzhi No. 13 linkage group LG1, S_indicum_v1.0, whole genome shotgun sequence	transmembrane 9 superfamily member 8
	3677	NC_026151.1 - XP_011083969.1	85.075	67	10	0	1	67	1672	1606	1.09e-14	77	NC_026151.1_-_XP_011083969.1	84	57	57	0	85.07	1	-1	TGCAGAGTTGGAAGTAGCAGAGCACGATTGTTATCTCCGCACACGTGACGAGGAGGATGATGAAGAC	TGCAGAGTTGGAAATAGCAGAGCACGACTGTAATCTCAGCGCAGGTCACAATAAGGATGATGAAGAC	69	1917	NC_026151.1_-_XP_011083969.1 Sesamum indicum cultivar Zhongzhi No. 13 linkage group LG7, S_indicum_v1.0, whole genome shotgun sequence	transmembrane 9 superfamily member 8
	3685	NC_026148.1 - XP_011075956.1	85.507	69	10	0	1	69	2217	2285	8.92e-16	80.6	NC_026148.1_-_XP_011075956.1	88	59	59	0	85.51	1	1	TGCAGAGTTGTCTGCACATACATCTGGAGCTGATGATGAAATGATTGAATATACTAATTCTCTGAGGAA	TGCAGAGTTGTCTGCCCACACATCAGGTGCTGATGATGAAATGATAGAATACACTAATCTTCTAAGAAA	69	2610	NC_026148.1_-_XP_011075956.1 Sesamum indicum cultivar Zhongzhi No. 13 linkage group LG4, S_indicum_v1.0, whole genome shotgun sequence	importin subunit beta-1
	3685	NC_026151.1 - XP_011084525.1	82.609	69	12	0	1	69	2217	2285	4.62e-13	71.6	NC_026151.1_-_XP_011084525.1	78	57	57	0	82.61	1	1	TGCAGAGTTGTCTGCACATACATCTGGAGCTGATGATGAAATGATTGAATATACTAATTCTCTGAGGAA	TGCGGAGTTGTCTGTGCACACATCAGGTGCTGATGATGAAATGATAGAATACACTAATCTTTTAAGGAA	69	2610	NC_026151.1_-_XP_011084525.1 Sesamum indicum cultivar Zhongzhi No. 13 linkage group LG7, S_indicum_v1.0, whole genome shotgun sequence	importin subunit beta-1 isoform X2
	3688	NC_026156.1 - XP_020553950.1	92.647	68	5	0	2	69	1072	1139	9.52e-22	101	NC_026156.1_-_XP_020553950.1	111	63	63	0	92.65	1	1	GCAGAGTTGTTGGCTGACATGGATAATCAGATACTAAATGCAAAAGAAGAGGCTCTTAGCAGGAAGGA	GCAGAGTTATTGGCTGACATGGATAATCAGATAGTAAAAGCAAAAGAAGAGGCCCTGAGCAGGAAGGA	69	1746	NC_026156.1_-_XP_020553950.1 Sesamum indicum cultivar Zhongzhi No. 13 linkage group LG12, S_indicum_v1.0, whole genome shotgun sequence	65-kDa microtubule-associated protein 1
	3688	NC_026158.1 - XP_011097829.1	89.855	69	7	0	1	69	1071	1139	1.41e-19	94.2	NC_026158.1_-_XP_011097829.1	103	62	62	0	89.86	1	1	TGCAGAGTTGTTGGCTGACATGGATAATCAGATACTAAATGCAAAAGAAGAGGCTCTTAGCAGGAAGGA	TGTAGAGTTATTGGCTGACATGGATAATCAGATAGTAAAAGCAAAAGAGGAGGCTGTGAGCAGGAAGGA	69	1746	NC_026158.1_-_XP_011097829.1 Sesamum indicum cultivar Zhongzhi No. 13 linkage group LG14, S_indicum_v1.0, whole genome shotgun sequence	65-kDa microtubule-associated protein 1
	3689	NC_026146.1 - XP_011070356.1	91.304	69	6	0	1	69	1464	1532	3.32e-21	98.7	NC_026146.1_-_XP_011070356.1	108	63	63	0	91.3	1	1	TGCAGAGTTGTTTGAGGAAGCAAGAGAAATACTGGAAAAGGAATGTGGCCCATGTCATCAGGATACTCT	TGCAGAGTTGTTTGAGGAAGCTAGAGAAATACTGGAACAGGAGTGTGGACCATGCCATCAGGATACACT	69	1812	NC_026146.1_-_XP_011070356.1 Sesamum indicum cultivar Zhongzhi No. 13 linkage group LG2, S_indicum_v1.0, whole genome shotgun sequence	protein KINESIN LIGHT CHAIN-RELATED 1
	3704	NC_026145.1 - XP_011085132.1	85.507	69	10	0	1	69	2046	1978	8.92e-16	80.6	NC_026145.1_-_XP_011085132.1	88	59	59	0	85.51	1	-1	TGCAGAGTTTGTGTTTGTTCTTACTCTGACAGAAGCATCAATCATTCCTTTCAATCCGTATTTTGGGGC	TGCAGAGCTTGTATTAGTTCTTACTCGCACAGAAGCATCAATCATCCCTTTCAGTCCATACTTTGGAGC	69	4368	NC_026145.1_-_XP_011085132.1 Sesamum indicum cultivar Zhongzhi No. 13 linkage group LG1, S_indicum_v1.0, whole genome shotgun sequence	DNA replication ATP-dependent helicase/nuclease DNA2 isoform X3
	3704	NC_026145.1 - XP_020550977.1	85.507	69	10	0	1	69	2046	1978	8.92e-16	80.6	NC_026145.1_-_XP_020550977.1	88	59	59	0	85.51	1	-1	TGCAGAGTTTGTGTTTGTTCTTACTCTGACAGAAGCATCAATCATTCCTTTCAATCCGTATTTTGGGGC	TGCAGAGCTTGTATTAGTTCTTACTCGCACAGAAGCATCAATCATCCCTTTCAGTCCATACTTTGGAGC	69	3873	NC_026145.1_-_XP_020550977.1 Sesamum indicum cultivar Zhongzhi No. 13 linkage group LG1, S_indicum_v1.0, whole genome shotgun sequence	DNA replication ATP-dependent helicase/nuclease DNA2 isoform X3
	3729	NC_026152.1 - XP_011086624.1	85.507	69	10	0	1	69	431	363	8.92e-16	80.6	NC_026152.1_-_XP_011086624.1	88	59	59	0	85.51	1	-1	TGCAGATAAACTCCGAGCATCTCGATTTGGCCGGCGCCGTACGCTTGGCCGCATAGGGTTTCGAGCGCG	TGCATGTAGACGCCGAGCATGTCGATTTGGCCGGCGCCGTACGCTTGGCCACAGAGTGTTTCCAGTGCG	69	1551	NC_026152.1_-_XP_011086624.1 Sesamum indicum cultivar Zhongzhi No. 13 linkage group LG8, S_indicum_v1.0, whole genome shotgun sequence	protein DETOXIFICATION 29 isoform X3
	3729	NC_026152.1 - XP_011086625.1	85.507	69	10	0	1	69	431	363	8.92e-16	80.6	NC_026152.1_-_XP_011086625.1	88	59	59	0	85.51	1	-1	TGCAGATAAACTCCGAGCATCTCGATTTGGCCGGCGCCGTACGCTTGGCCGCATAGGGTTTCGAGCGCG	TGCATGTAGACGCCGAGCATGTCGATTTGGCCGGCGCCGTACGCTTGGCCACAGAGTGTTTCCAGTGCG	69	1494	NC_026152.1_-_XP_011086625.1 Sesamum indicum cultivar Zhongzhi No. 13 linkage group LG8, S_indicum_v1.0, whole genome shotgun sequence	protein DETOXIFICATION 29 isoform X3
	3743	NC_026152.1 - XP_011087164.1	84.375	64	10	0	1	64	75	138	4.62e-13	71.6	NC_026152.1_-_XP_011087164.1	78	54	54	0	84.38	1	1	TGCAGATAACAGAATCTACCACAAGGCTTGCTTCAGATGCCACCACTGCAAAGGGACTCTCAAG	TGCTGACAACAAAGTGTTTCACAAGGCTTGTTTTAGATGCCACCACTGCAAAGGGACGCTCAAG	69	567	NC_026152.1_-_XP_011087164.1 Sesamum indicum cultivar Zhongzhi No. 13 linkage group LG8, S_indicum_v1.0, whole genome shotgun sequence	LIM domain-containing protein WLIM1
	3743	NC_026147.1 - XP_011074349.1	84.127	63	10	0	2	64	73	135	1.61e-12	69.8	NC_026147.1_-_XP_011074349.1	76	53	53	0	84.13	1	1	GCAGATAACAGAATCTACCACAAGGCTTGCTTCAGATGCCACCACTGCAAAGGGACTCTCAAG	GCTGACAACAGAGTTTACCACAAGGCCTGTTTTAGATGCCACCATTGCAAGGGCACTCTCAAG	69	582	NC_026147.1_-_XP_011074349.1 Sesamum indicum cultivar Zhongzhi No. 13 linkage group LG3, S_indicum_v1.0, whole genome shotgun sequence	LIM domain-containing protein WLIM1
	3744	NC_026159.1 - XP_011099653.1	87.5	64	8	0	6	69	1045	1108	8.92e-16	80.6	NC_026159.1_-_XP_011099653.1	88	56	56	0	87.5	1	1	ATAACAGAGAAATGTATAAGCCAGATGAGAAGATCATTGCAGGATGTGATTTCGGAATGGATAA	ATAACAGAAAAATGTATCAGGCAAATGGGACAATCATTGCAGGATGTGATTTCAGAATGGATAA	69	1392	NC_026159.1_-_XP_011099653.1 Sesamum indicum cultivar Zhongzhi No. 13 linkage group LG15, S_indicum_v1.0, whole genome shotgun sequence	E3 ubiquitin-protein ligase CHFR isoform X2
	3744	NC_026159.1 - XP_011099654.1	87.5	64	8	0	6	69	1039	1102	8.92e-16	80.6	NC_026159.1_-_XP_011099654.1	88	56	56	0	87.5	1	1	ATAACAGAGAAATGTATAAGCCAGATGAGAAGATCATTGCAGGATGTGATTTCGGAATGGATAA	ATAACAGAAAAATGTATCAGGCAAATGGGACAATCATTGCAGGATGTGATTTCAGAATGGATAA	69	1386	NC_026159.1_-_XP_011099654.1 Sesamum indicum cultivar Zhongzhi No. 13 linkage group LG15, S_indicum_v1.0, whole genome shotgun sequence	E3 ubiquitin-protein ligase CHFR isoform X2
	3748	NC_026149.1 - XP_011077952.1	91.045	67	6	0	3	69	506	572	4.05e-20	95.1	NC_026149.1_-_XP_011077952.1	104	61	61	0	91.04	1	1	CAGATAACATCTTCACACTGCGAAAATGGTGCTCAAACAATTTCCCTCAGGCAAAAGAGCAACTTGA	CAGATAACATCTTTACACTGCAACAATGGTGCTCACACAACTTCCCTCAGGCAAAAGAGCAACTGGA	69	681	NC_026149.1_-_XP_011077952.1 Sesamum indicum cultivar Zhongzhi No. 13 linkage group LG5, S_indicum_v1.0, whole genome shotgun sequence	meiotic nuclear division protein 1 homolog
	3772	NC_026149.1 - XP_011078545.1	85.507	69	10	0	1	69	1347	1415	8.92e-16	80.6	NC_026149.1_-_XP_011078545.1	88	59	59	0	85.51	1	1	TGCAGATAAGTTCCAGGAACTGGCTGCTTTAGCTATGTTCAACTGGGGTAATGTTCATATGTCAAGAGC	TGCTGATAAGTTCCAGGAACTGGCAGCTTTAGCTTTGTTTGATTGGGGGAATGTTCACATCTCAAGGGC	69	2196	NC_026149.1_-_XP_011078545.1 Sesamum indicum cultivar Zhongzhi No. 13 linkage group LG5, S_indicum_v1.0, whole genome shotgun sequence	HSP-interacting protein
	3799	NC_026152.1 - XP_020552016.1	87.879	66	8	0	4	69	15	80	7.32e-17	84.2	NC_026152.1_-_XP_020552016.1	92	58	58	0	87.88	1	1	AGATAATGGTGGCGGCATGACTCCAAATAAGATGCGGCAGTGCATGTCTTTAGGATATTCTGCGAA	AGATAATGGTGGGGGGATGACTCCTGATAAGATGCGACAGTGCATGTCTCTAGGCTATTCTGCAAA	69	1689	NC_026152.1_-_XP_020552016.1 Sesamum indicum cultivar Zhongzhi No. 13 linkage group LG8, S_indicum_v1.0, whole genome shotgun sequence	protein MICRORCHIDIA 7-like
	3799	NC_026147.1 - XP_011073104.1	83.333	66	11	0	4	69	615	680	1.61e-12	70.7	NC_026147.1_-_XP_011073104.1	77	55	55	0	83.33	1	1	AGATAATGGTGGCGGCATGACTCCAAATAAGATGCGGCAGTGCATGTCTTTAGGATATTCTGCGAA	AGATAATGGTGGCGGAATGGATCCGGATAAAATGCGTCAGTGCATGTCTCTTGGTTATTCTGCAAA	69	2424	NC_026147.1_-_XP_011073104.1 Sesamum indicum cultivar Zhongzhi No. 13 linkage group LG3, S_indicum_v1.0, whole genome shotgun sequence	protein MICRORCHIDIA 7-like
	3806	NC_026157.1 - XP_011097444.1	88.235	68	8	0	1	68	177	110	6.01e-18	87.8	NC_026157.1_-_XP_011097444.1	96	60	60	0	88.24	1	-1	TGCAGATAATGTTTGCTTGACAGCATCTATGGCACCCGAGTATTTTGGAGGCTGTCCGGGAAGAGGAG	TGCAGCTAATGTTTGCTTCACAGCATCTATGGCACCAGAATATTTTGGAGGTTGGCCAGGAAGTGGAG	69	894	NC_026157.1_-_XP_011097444.1 Sesamum indicum cultivar Zhongzhi No. 13 linkage group LG13, S_indicum_v1.0, whole genome shotgun sequence	mitochondrial carnitine/acylcarnitine carrier-like protein
	3806	NC_026157.1 - XP_011097446.1	88.235	68	8	0	1	68	177	110	6.01e-18	87.8	NC_026157.1_-_XP_011097446.1	96	60	60	0	88.24	1	-1	TGCAGATAATGTTTGCTTGACAGCATCTATGGCACCCGAGTATTTTGGAGGCTGTCCGGGAAGAGGAG	TGCAGCTAATGTTTGCTTCACAGCATCTATGGCACCAGAATATTTTGGAGGTTGGCCAGGAAGTGGAG	69	894	NC_026157.1_-_XP_011097446.1 Sesamum indicum cultivar Zhongzhi No. 13 linkage group LG13, S_indicum_v1.0, whole genome shotgun sequence	mitochondrial carnitine/acylcarnitine carrier-like protein
	3807	NC_026157.1 - XP_011097444.1	88.235	68	8	0	1	68	177	110	6.01e-18	87.8	NC_026157.1_-_XP_011097444.1	96	60	60	0	88.24	1	-1	TGCAGATAATGTTTGCTTGACAGCATCTATGGCACCCGAGTATTTTGGAGGCTGTCCGGGAAGAGGAG	TGCAGCTAATGTTTGCTTCACAGCATCTATGGCACCAGAATATTTTGGAGGTTGGCCAGGAAGTGGAG	69	894	NC_026157.1_-_XP_011097444.1 Sesamum indicum cultivar Zhongzhi No. 13 linkage group LG13, S_indicum_v1.0, whole genome shotgun sequence	mitochondrial carnitine/acylcarnitine carrier-like protein
	3807	NC_026157.1 - XP_011097446.1	88.235	68	8	0	1	68	177	110	6.01e-18	87.8	NC_026157.1_-_XP_011097446.1	96	60	60	0	88.24	1	-1	TGCAGATAATGTTTGCTTGACAGCATCTATGGCACCCGAGTATTTTGGAGGCTGTCCGGGAAGAGGAG	TGCAGCTAATGTTTGCTTCACAGCATCTATGGCACCAGAATATTTTGGAGGTTGGCCAGGAAGTGGAG	69	894	NC_026157.1_-_XP_011097446.1 Sesamum indicum cultivar Zhongzhi No. 13 linkage group LG13, S_indicum_v1.0, whole genome shotgun sequence	mitochondrial carnitine/acylcarnitine carrier-like protein
	3808	NC_026157.1 - XP_011097444.1	88.235	68	8	0	1	68	177	110	6.01e-18	87.8	NC_026157.1_-_XP_011097444.1	96	60	60	0	88.24	1	-1	TGCAGATAATGTTTGCTTGACAGCATCTATGGCACCCGAGTATTTTGGAGGCTGTCCGGGAAGAGGAG	TGCAGCTAATGTTTGCTTCACAGCATCTATGGCACCAGAATATTTTGGAGGTTGGCCAGGAAGTGGAG	69	894	NC_026157.1_-_XP_011097444.1 Sesamum indicum cultivar Zhongzhi No. 13 linkage group LG13, S_indicum_v1.0, whole genome shotgun sequence	mitochondrial carnitine/acylcarnitine carrier-like protein
	3808	NC_026157.1 - XP_011097446.1	88.235	68	8	0	1	68	177	110	6.01e-18	87.8	NC_026157.1_-_XP_011097446.1	96	60	60	0	88.24	1	-1	TGCAGATAATGTTTGCTTGACAGCATCTATGGCACCCGAGTATTTTGGAGGCTGTCCGGGAAGAGGAG	TGCAGCTAATGTTTGCTTCACAGCATCTATGGCACCAGAATATTTTGGAGGTTGGCCAGGAAGTGGAG	69	894	NC_026157.1_-_XP_011097446.1 Sesamum indicum cultivar Zhongzhi No. 13 linkage group LG13, S_indicum_v1.0, whole genome shotgun sequence	mitochondrial carnitine/acylcarnitine carrier-like protein
	3816	NC_026152.1 - XP_011085198.1	87.037	54	7	0	5	58	2631	2684	1.96e-11	67.1	NC_026152.1_-_XP_011085198.1	73	47	47	0	87.04	1	1	GATAATTGAGATCCTTGAGCTGGTCAGAAGAGAATTGAGTGGAGAATGTACTAA	GATTATTGAGATCCTCGAGCTGGTCAGGAGGGAATTGAGTGGAGGATCTACCAA	69	2694	NC_026152.1_-_XP_011085198.1 Sesamum indicum cultivar Zhongzhi No. 13 linkage group LG8, S_indicum_v1.0, whole genome shotgun sequence	WPP domain-associated protein
	3830	NC_026156.1 - XP_011095535.1	86.957	69	9	0	1	69	326	258	7.32e-17	85.1	NC_026156.1_-_XP_011095535.1	93	60	60	0	86.96	1	-1	TGCAGATACACCTTCAGCGGCTCCACGTACTCCTCGAACCCTAGCGTCGTCATCGCCCACAGCAGATCG	TGCAGATATATCTTAAGCGGCTCCACGTAGTCCTCGAACCCGAGAGTCGTCATCGCCCACAATAAATCG	69	615	NC_026156.1_-_XP_011095535.1 Sesamum indicum cultivar Zhongzhi No. 13 linkage group LG12, S_indicum_v1.0, whole genome shotgun sequence	nuclear transcription factor Y subunit B-3
	3830	NC_026158.1 - XP_011097763.1	91.228	57	5	0	13	69	296	240	8.92e-16	81.5	NC_026158.1_-_XP_011097763.1	89	52	52	0	91.23	1	-1	TTCAGCGGCTCCACGTACTCCTCGAACCCTAGCGTCGTCATCGCCCACAGCAGATCG	TTCAGCGGCTCCACGTAATCCTCGAACCCCAGGGTCGTCATCGCCCATAGCAAATCG	69	600	NC_026158.1_-_XP_011097763.1 Sesamum indicum cultivar Zhongzhi No. 13 linkage group LG14, S_indicum_v1.0, whole genome shotgun sequence	nuclear transcription factor Y subunit B-3-like
	3831	NC_026149.1 - XP_020549445.1	91.304	69	6	0	1	69	749	817	3.32e-21	98.7	NC_026149.1_-_XP_020549445.1	108	63	63	0	91.3	1	1	TGCAGATACACGATGAAGCGAAAAAGTTTTCGTATCAAACTGGTGTTAGGGTAGTTGTTGCTTATGGAG	TGCAGATACACGAGGAAGCTAGAAAGTTTTCCTATCAAACTGGTGTTAGAGTAGTTGTTGCGTATGGAG	69	1839	NC_026149.1_-_XP_020549445.1 Sesamum indicum cultivar Zhongzhi No. 13 linkage group LG5, S_indicum_v1.0, whole genome shotgun sequence	DEAD-box ATP-dependent RNA helicase 37-like
	3831	NC_026149.1 - XP_011078806.1	91.304	69	6	0	1	69	749	817	3.32e-21	98.7	NC_026149.1_-_XP_011078806.1	108	63	63	0	91.3	1	1	TGCAGATACACGATGAAGCGAAAAAGTTTTCGTATCAAACTGGTGTTAGGGTAGTTGTTGCTTATGGAG	TGCAGATACACGAGGAAGCTAGAAAGTTTTCCTATCAAACTGGTGTTAGAGTAGTTGTTGCGTATGGAG	69	1839	NC_026149.1_-_XP_011078806.1 Sesamum indicum cultivar Zhongzhi No. 13 linkage group LG5, S_indicum_v1.0, whole genome shotgun sequence	DEAD-box ATP-dependent RNA helicase 37-like
	3840	NC_026150.1 - XP_011080219.1	82.54	63	11	0	6	68	1128	1190	6.86e-11	65.3	NC_026150.1_-_XP_011080219.1	71	52	52	0	82.54	1	1	ATACAGTGATGAAAAGATCAGAATTAGTCGTGGCTACAACAACATTTTGTTCGTCCACATCCG	ATATACTGATGAAAAGATCAGAATTAGCCGTGGATACGGCAAGATTCTTTTCATCCACGTCCG	69	1215	NC_026150.1_-_XP_011080219.1 Sesamum indicum cultivar Zhongzhi No. 13 linkage group LG6, S_indicum_v1.0, whole genome shotgun sequence	probable plastid-lipid-associated protein 12, chloroplastic
	3848	NC_026147.1 - XP_011073241.1	89.062	64	7	0	6	69	792	855	7.32e-17	85.1	NC_026147.1_-_XP_011073241.1	93	57	57	0	89.06	1	1	ATACCATAGCCTTCACCACACAGACATGAGGACTAACTTTTGCCTCTTCATGCCTTTGTATGAT	ATACCACAGTCTTCACCACATGGACATGGGGACTAACTTTTGCCTCTTCATGCCTGTATATGAT	69	1932	NC_026147.1_-_XP_011073241.1 Sesamum indicum cultivar Zhongzhi No. 13 linkage group LG3, S_indicum_v1.0, whole genome shotgun sequence	protein ECERIFERUM 3-like isoform X3
	3848	NC_026147.1 - XP_011073242.1	89.062	64	7	0	6	69	792	855	7.32e-17	85.1	NC_026147.1_-_XP_011073242.1	93	57	57	0	89.06	1	1	ATACCATAGCCTTCACCACACAGACATGAGGACTAACTTTTGCCTCTTCATGCCTTTGTATGAT	ATACCACAGTCTTCACCACATGGACATGGGGACTAACTTTTGCCTCTTCATGCCTGTATATGAT	69	1926	NC_026147.1_-_XP_011073242.1 Sesamum indicum cultivar Zhongzhi No. 13 linkage group LG3, S_indicum_v1.0, whole genome shotgun sequence	protein ECERIFERUM 3-like isoform X3
	3862	NC_026152.1 - XP_011086635.1	86.957	69	9	0	1	69	1541	1609	7.32e-17	85.1	NC_026152.1_-_XP_011086635.1	93	60	60	0	86.96	1	1	TGCAGATACTAAAGCTCGGATACCATGTGCTTCTGAGCGATGTGGACGTGTATTGGTTCAAGAATCCTT	TGCAGATATTAAAGCTCGGATATAATGTGCTTCTGAGTGACGTGGATGTATACTGGTTCAAAAATCCTT	69	2121	NC_026152.1_-_XP_011086635.1 Sesamum indicum cultivar Zhongzhi No. 13 linkage group LG8, S_indicum_v1.0, whole genome shotgun sequence	beta-arabinofuranosyltransferase RAY1 isoform X2
	3862	NC_026152.1 - XP_011086636.1	86.957	69	9	0	1	69	1538	1606	7.32e-17	85.1	NC_026152.1_-_XP_011086636.1	93	60	60	0	86.96	1	1	TGCAGATACTAAAGCTCGGATACCATGTGCTTCTGAGCGATGTGGACGTGTATTGGTTCAAGAATCCTT	TGCAGATATTAAAGCTCGGATATAATGTGCTTCTGAGTGACGTGGATGTATACTGGTTCAAAAATCCTT	69	2118	NC_026152.1_-_XP_011086636.1 Sesamum indicum cultivar Zhongzhi No. 13 linkage group LG8, S_indicum_v1.0, whole genome shotgun sequence	beta-arabinofuranosyltransferase RAY1 isoform X2
	3863	NC_026152.1 - XP_011086635.1	86.957	69	9	0	1	69	1541	1609	7.32e-17	85.1	NC_026152.1_-_XP_011086635.1	93	60	60	0	86.96	1	1	TGCAGATACTAAAGCTCGGATACCATGTGCTTCTGAGCGATGTGGACGTGTATTGGTTCAAGAATCCTT	TGCAGATATTAAAGCTCGGATATAATGTGCTTCTGAGTGACGTGGATGTATACTGGTTCAAAAATCCTT	69	2121	NC_026152.1_-_XP_011086635.1 Sesamum indicum cultivar Zhongzhi No. 13 linkage group LG8, S_indicum_v1.0, whole genome shotgun sequence	beta-arabinofuranosyltransferase RAY1 isoform X2
	3863	NC_026152.1 - XP_011086636.1	86.957	69	9	0	1	69	1538	1606	7.32e-17	85.1	NC_026152.1_-_XP_011086636.1	93	60	60	0	86.96	1	1	TGCAGATACTAAAGCTCGGATACCATGTGCTTCTGAGCGATGTGGACGTGTATTGGTTCAAGAATCCTT	TGCAGATATTAAAGCTCGGATATAATGTGCTTCTGAGTGACGTGGATGTATACTGGTTCAAAAATCCTT	69	2118	NC_026152.1_-_XP_011086636.1 Sesamum indicum cultivar Zhongzhi No. 13 linkage group LG8, S_indicum_v1.0, whole genome shotgun sequence	beta-arabinofuranosyltransferase RAY1 isoform X2
	3875	NC_026150.1 - XP_020550309.1	89.231	65	7	0	3	67	172	236	2.1e-17	86.9	NC_026150.1_-_XP_020550309.1	95	58	58	0	89.23	1	1	CAGATAGAAAAAATTGTTCTCTTTATGCTGGAACAACAAGGCCTACTAGCAAGCAGGATTGCCCA	CAGATAGAAAAAATTGTTCTCTTTCTGTTGGAACAACAAGGACTATTCGCAAGAAGGATTGCGCA	69	2088	NC_026150.1_-_XP_020550309.1 Sesamum indicum cultivar Zhongzhi No. 13 linkage group LG6, S_indicum_v1.0, whole genome shotgun sequence	SPX domain-containing membrane protein At4g22990 isoform X2
	3875	NC_026150.1 - XP_011081042.1	89.231	65	7	0	3	67	172	236	2.1e-17	86.9	NC_026150.1_-_XP_011081042.1	95	58	58	0	89.23	1	1	CAGATAGAAAAAATTGTTCTCTTTATGCTGGAACAACAAGGCCTACTAGCAAGCAGGATTGCCCA	CAGATAGAAAAAATTGTTCTCTTTCTGTTGGAACAACAAGGACTATTCGCAAGAAGGATTGCGCA	69	2088	NC_026150.1_-_XP_011081042.1 Sesamum indicum cultivar Zhongzhi No. 13 linkage group LG6, S_indicum_v1.0, whole genome shotgun sequence	SPX domain-containing membrane protein At4g22990 isoform X2
	3879	NC_026152.1 - XP_011086869.1	85.294	68	10	0	2	69	1121	1054	3.11e-15	78.8	NC_026152.1_-_XP_011086869.1	86	58	58	0	85.29	1	-1	GCAGATAGAACAATCTCCAAAGGAAGAGGGGCCAAAGACGACCAGTATTCATGTTTTGACTCAGCAAT	GCAGATAGAACAACTTCTAGAGGAAGAGGTGCCAAAGATGACCAATATTCATGCTTTGACAAAGCAAT	69	1674	NC_026152.1_-_XP_011086869.1 Sesamum indicum cultivar Zhongzhi No. 13 linkage group LG8, S_indicum_v1.0, whole genome shotgun sequence	coiled-coil domain-containing protein SCD2
	3879	NC_026152.1 - XP_020552056.1	85.294	68	10	0	2	69	1121	1054	3.11e-15	78.8	NC_026152.1_-_XP_020552056.1	86	58	58	0	85.29	1	-1	GCAGATAGAACAATCTCCAAAGGAAGAGGGGCCAAAGACGACCAGTATTCATGTTTTGACTCAGCAAT	GCAGATAGAACAACTTCTAGAGGAAGAGGTGCCAAAGATGACCAATATTCATGCTTTGACAAAGCAAT	69	1674	NC_026152.1_-_XP_020552056.1 Sesamum indicum cultivar Zhongzhi No. 13 linkage group LG8, S_indicum_v1.0, whole genome shotgun sequence	coiled-coil domain-containing protein SCD2
	3888	NC_026146.1 - XP_011070741.1	86.957	69	9	0	1	69	1112	1180	7.32e-17	85.1	NC_026146.1_-_XP_011070741.1	93	60	60	0	86.96	1	1	TGCAGATAGACATTGCAGCAGAGACTGACAATGACTTGATGATTTGGAAAGGATGGGTTGAGTCCCGAA	TGCAGATAGATATAGCAGCAGAGACCGATGATGACTTGATGAATTGGAAAGGTTGGGTGGAGTCCAGAA	69	2190	NC_026146.1_-_XP_011070741.1 Sesamum indicum cultivar Zhongzhi No. 13 linkage group LG2, S_indicum_v1.0, whole genome shotgun sequence	nuclear poly(A) polymerase 1
	3888	NC_026145.1 - XP_011076146.1	84.375	64	10	0	1	64	1112	1175	4.62e-13	71.6	NC_026145.1_-_XP_011076146.1	78	54	54	0	84.38	1	1	TGCAGATAGACATTGCAGCAGAGACTGACAATGACTTGATGATTTGGAAAGGATGGGTTGAGTC	TGCAGATAGACATTGCAGCAAAGAATGAAGGTGACTTGTTGAATTGGAAAGGTTGGATCGAGTC	69	2106	NC_026145.1_-_XP_011076146.1 Sesamum indicum cultivar Zhongzhi No. 13 linkage group LG1, S_indicum_v1.0, whole genome shotgun sequence	nuclear poly(A) polymerase 1-like
	3905	NC_026146.1 - XP_011070775.1	82.09	67	12	0	1	67	1844	1910	5.63e-12	68	NC_026146.1_-_XP_011070775.1	74	55	55	0	82.09	1	1	TGCAGATAGCAATGGCGTGCACGCAGGCGGCGCCGGATCAGCGGCCGAAGATCAACTATGTGGTGAA	TGCAGATCGGGATGGCTTGCGCCCAAGCCTCGCCTGACCAGCGGCCGAAGATGAACTATGTGGTGAA	69	2019	NC_026146.1_-_XP_011070775.1 Sesamum indicum cultivar Zhongzhi No. 13 linkage group LG2, S_indicum_v1.0, whole genome shotgun sequence	probable leucine-rich repeat receptor-like protein kinase At1g68400
	3909	NC_026147.1 - XP_011073443.1	88.406	69	8	0	1	69	1573	1505	1.72e-18	89.7	NC_026147.1_-_XP_011073443.1	98	61	61	0	88.41	1	-1	TGCAGATAGCCTTTTGGGATGCGGCTAGCTCCCGGTCAGGAAAGCTATCATCCAATTGAAAACTCAGCC	TGCAAATAGCCTTTTGTGATGCTGCCAGCTCCCGATCTGGAAAGCTATCCTCCAAATGAAAACTCAGCC	69	1647	NC_026147.1_-_XP_011073443.1 Sesamum indicum cultivar Zhongzhi No. 13 linkage group LG3, S_indicum_v1.0, whole genome shotgun sequence	ATP-dependent RNA helicase SUV3, mitochondrial
	3923	NC_026147.1 - XP_011071846.1	85.938	64	9	0	4	67	362	425	3.79e-14	76.1	NC_026147.1_-_XP_011071846.1	83	55	55	0	85.94	1	1	AGATAGGCACTTTGTTGTATGTCCGAGTTGTCAAGGCAGAGACCGGAATGAACCCTGAGCTATC	AGATTGGCACTTTGCTGTATGTCCGTGTTGTCAAGGCGAACACTGGCATGAACCCTGAGTTATC	69	723	NC_026147.1_-_XP_011071846.1 Sesamum indicum cultivar Zhongzhi No. 13 linkage group LG3, S_indicum_v1.0, whole genome shotgun sequence	putative exosome complex component rrp40
	3923	NC_026147.1 - XP_011071845.1	85.938	64	9	0	4	67	362	425	3.79e-14	76.1	NC_026147.1_-_XP_011071845.1	83	55	55	0	85.94	1	1	AGATAGGCACTTTGTTGTATGTCCGAGTTGTCAAGGCAGAGACCGGAATGAACCCTGAGCTATC	AGATTGGCACTTTGCTGTATGTCCGTGTTGTCAAGGCGAACACTGGCATGAACCCTGAGTTATC	69	723	NC_026147.1_-_XP_011071845.1 Sesamum indicum cultivar Zhongzhi No. 13 linkage group LG3, S_indicum_v1.0, whole genome shotgun sequence	putative exosome complex component rrp40
	3933	NC_026152.1 - XP_011087185.1	88.235	51	6	0	12	62	2278	2228	1.96e-11	66.2	NC_026152.1_-_XP_011087185.1	72	45	45	0	88.24	1	-1	CCTGAATCTTTGTAAGCATAAATGTTGTATGGTTGAAAAGGGATTCCATCA	CCTGAATTTTTGTAAGCATAAACGTTGTGTGGTTGAAGAGAGATTCAATCA	69	2880	NC_026152.1_-_XP_011087185.1 Sesamum indicum cultivar Zhongzhi No. 13 linkage group LG8, S_indicum_v1.0, whole genome shotgun sequence	transportin MOS14
	3934	NC_026152.1 - XP_011087185.1	88.235	51	6	0	12	62	2278	2228	1.96e-11	66.2	NC_026152.1_-_XP_011087185.1	72	45	45	0	88.24	1	-1	CCTGAATCTTTGTAAGCATAAATGTTGTATGGTTGAAAAGGGATTCCATCA	CCTGAATTTTTGTAAGCATAAACGTTGTGTGGTTGAAGAGAGATTCAATCA	69	2880	NC_026152.1_-_XP_011087185.1 Sesamum indicum cultivar Zhongzhi No. 13 linkage group LG8, S_indicum_v1.0, whole genome shotgun sequence	transportin MOS14
	3939	NC_026155.1 - XP_011093425.1	86.441	59	8	0	6	64	919	977	4.62e-13	71.6	NC_026155.1_-_XP_011093425.1	78	51	51	0	86.44	1	1	ATAGTATCCAAAAGTCTGTCTGAACCTATACGTTCCCACAAGGACCTAGACAAAGATTC	ATTGTGTCTAAAAATCTGTCTGAACCTATTCGTTCACACAAGGATCTGGACAAAGATTC	69	2307	NC_026155.1_-_XP_011093425.1 Sesamum indicum cultivar Zhongzhi No. 13 linkage group LG11, S_indicum_v1.0, whole genome shotgun sequence	protein transport protein SEC23
	3939	NC_026155.1 - XP_011093428.1	86.441	59	8	0	6	64	919	977	4.62e-13	71.6	NC_026155.1_-_XP_011093428.1	78	51	51	0	86.44	1	1	ATAGTATCCAAAAGTCTGTCTGAACCTATACGTTCCCACAAGGACCTAGACAAAGATTC	ATTGTGTCTAAAAATCTGTCTGAACCTATTCGTTCACACAAGGATCTGGACAAAGATTC	69	2307	NC_026155.1_-_XP_011093428.1 Sesamum indicum cultivar Zhongzhi No. 13 linkage group LG11, S_indicum_v1.0, whole genome shotgun sequence	protein transport protein SEC23
	3942	NC_026159.1 - XP_011099878.1	84.615	65	10	0	5	69	124	188	1.32e-13	73.4	NC_026159.1_-_XP_011099878.1	80	55	55	0	84.62	1	1	GATAGTCCATATGCCGGCGGTGTTTTCCTAGTCTCTATTCATTTTCCTCCTGATTATCCTTTCAA	GACAGCCCATATGCTGGTGGTGTTTTCCAAGTTACCATTCATTTCCCACCTGATTATCCTTTCAA	69	447	NC_026159.1_-_XP_011099878.1 Sesamum indicum cultivar Zhongzhi No. 13 linkage group LG15, S_indicum_v1.0, whole genome shotgun sequence	ubiquitin-conjugating enzyme E2-17 kDa
	3942	NC_026150.1 - XP_011080642.1	83.077	65	11	0	5	69	124	188	5.63e-12	68.9	NC_026150.1_-_XP_011080642.1	75	54	54	0	83.08	1	1	GATAGTCCATATGCCGGCGGTGTTTTCCTAGTCTCTATTCATTTTCCTCCTGATTATCCTTTCAA	GATAGCCCCTATGCTGGGGGTGTATTTTTAGTTTCAATTCATTTCCCTCCTGATTATCCTTTTAA	69	447	NC_026150.1_-_XP_011080642.1 Sesamum indicum cultivar Zhongzhi No. 13 linkage group LG6, S_indicum_v1.0, whole genome shotgun sequence	ubiquitin-conjugating enzyme E2-17 kDa
	3943	NC_026160.1 - XP_011100500.1	86.765	68	9	0	2	69	3221	3154	2.56e-16	83.3	NC_026160.1_-_XP_011100500.1	91	59	59	0	86.76	1	-1	GCAGATAGTCTCTCTCTGAGGCAGTATATCTGAGCAACATCAAGAGCTGTGGATTGGAAGGGTAGCCA	GCAGAAAGTCTCTCCCTCAGGCAGTAGATTTGAGCAACATCAAGAGCTGTGGACTCAAAGGGAAGCCA	69	3732	NC_026160.1_-_XP_011100500.1 Sesamum indicum cultivar Zhongzhi No. 13 linkage group LG16, S_indicum_v1.0, whole genome shotgun sequence	DExH-box ATP-dependent RNA helicase DExH6
	3951	NC_026151.1 - XP_011084416.1	89.062	64	7	0	3	66	966	1029	7.32e-17	85.1	NC_026151.1_-_XP_011084416.1	93	57	57	0	89.06	1	1	CAGATATAAAATCTACATCGAAGGCTCAGCATGGTCCGTGAGTGAGAAATACATCCTAGCTTGC	CAGATACAAAATCTACATTGAAGGATCTGCGTGGTCAGTGAGTGAGAAATACATTCTAGCTTGC	69	1542	NC_026151.1_-_XP_011084416.1 Sesamum indicum cultivar Zhongzhi No. 13 linkage group LG7, S_indicum_v1.0, whole genome shotgun sequence	protein O-glucosyltransferase 1 isoform X2
	3951	NC_026151.1 - XP_011084417.1	89.062	64	7	0	3	66	852	915	7.32e-17	85.1	NC_026151.1_-_XP_011084417.1	93	57	57	0	89.06	1	1	CAGATATAAAATCTACATCGAAGGCTCAGCATGGTCCGTGAGTGAGAAATACATCCTAGCTTGC	CAGATACAAAATCTACATTGAAGGATCTGCGTGGTCAGTGAGTGAGAAATACATTCTAGCTTGC	69	1428	NC_026151.1_-_XP_011084417.1 Sesamum indicum cultivar Zhongzhi No. 13 linkage group LG7, S_indicum_v1.0, whole genome shotgun sequence	protein O-glucosyltransferase 1 isoform X2
	3952	NC_026151.1 - XP_011084731.2	90.909	66	6	0	3	68	930	995	1.41e-19	93.3	NC_026151.1_-_XP_011084731.2	102	60	60	0	90.91	1	1	CAGATATAAAATCTACATTGAAGGCGTAGCATGGTCCGTGAGTGAGAAATACATCCTAGCTTGCGA	CAGATACAAAATCTACATTGAAGGAGTTGGGTGGTCAGTGAGTGAGAAATACATCCTAGCTTGCGA	69	1506	NC_026151.1_-_XP_011084731.2 Sesamum indicum cultivar Zhongzhi No. 13 linkage group LG7, S_indicum_v1.0, whole genome shotgun sequence	protein O-glucosyltransferase 1-like
	3952	NC_026151.1 - XP_011084416.1	87.879	66	8	0	3	68	966	1031	7.32e-17	84.2	NC_026151.1_-_XP_011084416.1	92	58	58	0	87.88	1	1	CAGATATAAAATCTACATTGAAGGCGTAGCATGGTCCGTGAGTGAGAAATACATCCTAGCTTGCGA	CAGATACAAAATCTACATTGAAGGATCTGCGTGGTCAGTGAGTGAGAAATACATTCTAGCTTGCGA	69	1542	NC_026151.1_-_XP_011084416.1 Sesamum indicum cultivar Zhongzhi No. 13 linkage group LG7, S_indicum_v1.0, whole genome shotgun sequence	protein O-glucosyltransferase 1 isoform X2
	3972	NC_026150.1 - XP_011083081.1	82.812	64	11	0	1	64	804	867	1.96e-11	67.1	NC_026150.1_-_XP_011083081.1	73	53	53	0	82.81	1	1	TGCAGATATAGATGGCAAAAACCAGAAACTGAACTCTCGAATTATCTTTGTCATTGCTCTATCG	TGCTGATTTCGTTGGCAAGAAACAGAAAATGAACCCTCGAATAATCTTTGTCATTGCTTTGTCG	69	2340	NC_026150.1_-_XP_011083081.1 Sesamum indicum cultivar Zhongzhi No. 13 linkage group LG6, S_indicum_v1.0, whole genome shotgun sequence	receptor-like serine/threonine-protein kinase ALE2 isoform X2
	3972	NC_026150.1 - XP_011083082.1	82.812	64	11	0	1	64	792	855	1.96e-11	67.1	NC_026150.1_-_XP_011083082.1	73	53	53	0	82.81	1	1	TGCAGATATAGATGGCAAAAACCAGAAACTGAACTCTCGAATTATCTTTGTCATTGCTCTATCG	TGCTGATTTCGTTGGCAAGAAACAGAAAATGAACCCTCGAATAATCTTTGTCATTGCTTTGTCG	69	2328	NC_026150.1_-_XP_011083082.1 Sesamum indicum cultivar Zhongzhi No. 13 linkage group LG6, S_indicum_v1.0, whole genome shotgun sequence	receptor-like serine/threonine-protein kinase ALE2 isoform X2
	4001	NC_026145.1 - XP_011087003.1	88.136	59	7	0	3	61	5767	5825	3.79e-14	76.1	NC_026145.1_-_XP_011087003.1	83	52	52	0	88.14	1	1	CAGATATCGCGTATTCTTGGTGGACCGAAGAAGGATCGATCCTCCACCAATAAAGAGTA	CAGATATCTCGTATTCTTGGTGGACCAAAGAAGGATCGCTCGTCCAGCAACAAGGAGTA	69	5826	NC_026145.1_-_XP_011087003.1 Sesamum indicum cultivar Zhongzhi No. 13 linkage group LG1, S_indicum_v1.0, whole genome shotgun sequence	callose synthase 1
	4001	NC_026145.1 - XP_011086997.1	88.136	59	7	0	3	61	5767	5825	3.79e-14	76.1	NC_026145.1_-_XP_011086997.1	83	52	52	0	88.14	1	1	CAGATATCGCGTATTCTTGGTGGACCGAAGAAGGATCGATCCTCCACCAATAAAGAGTA	CAGATATCTCGTATTCTTGGTGGACCAAAGAAGGATCGCTCGTCCAGCAACAAGGAGTA	69	5826	NC_026145.1_-_XP_011086997.1 Sesamum indicum cultivar Zhongzhi No. 13 linkage group LG1, S_indicum_v1.0, whole genome shotgun sequence	callose synthase 1
	4026	NC_026159.1 - XP_011100124.1	86.957	69	9	0	1	69	825	757	7.32e-17	85.1	NC_026159.1_-_XP_011100124.1	93	60	60	0	86.96	1	-1	TGCAGATATGCTTATCGGGTTTCTGCGTGTGCAGAAGCACTTGTTGATCACAACCTCACCAATGTGCGT	TGCAGAGATGCTTATGGGATTCCTGCGGGTACAGAAGCACTTGTTGATCACGACCTCACCAATATGTGT	69	1488	NC_026159.1_-_XP_011100124.1 Sesamum indicum cultivar Zhongzhi No. 13 linkage group LG15, S_indicum_v1.0, whole genome shotgun sequence	plant-specific TFIIB-related protein 1
	4027	NC_026159.1 - XP_011100124.1	86.957	69	9	0	1	69	825	757	7.32e-17	85.1	NC_026159.1_-_XP_011100124.1	93	60	60	0	86.96	1	-1	TGCAGATATGCTTATCGGGTTTCTGCGTGTGCAGAAGCACTTGTTGATCACAACCTCACCAATGTGCGT	TGCAGAGATGCTTATGGGATTCCTGCGGGTACAGAAGCACTTGTTGATCACGACCTCACCAATATGTGT	69	1488	NC_026159.1_-_XP_011100124.1 Sesamum indicum cultivar Zhongzhi No. 13 linkage group LG15, S_indicum_v1.0, whole genome shotgun sequence	plant-specific TFIIB-related protein 1
	4028	NC_026145.1 - XP_011089243.1	90.741	54	5	0	16	69	1492	1439	3.79e-14	76.1	NC_026145.1_-_XP_011089243.1	83	49	49	0	90.74	1	-1	TACCTTCAACTCTTCGGAACAAGGAGCTCAAGGGCACTCCATTTCTGCGGCAAA	TACCTTCAACCCTTCTGTACAAGGAGCTTAAAGGCACTCCATTTCTGCGGCAAA	69	3222	NC_026145.1_-_XP_011089243.1 Sesamum indicum cultivar Zhongzhi No. 13 linkage group LG1, S_indicum_v1.0, whole genome shotgun sequence	glycine--tRNA ligase, chloroplastic/mitochondrial 2 isoform X2
	4028	NC_026145.1 - XP_020552867.1	90.741	54	5	0	16	69	1123	1070	3.79e-14	76.1	NC_026145.1_-_XP_020552867.1	83	49	49	0	90.74	1	-1	TACCTTCAACTCTTCGGAACAAGGAGCTCAAGGGCACTCCATTTCTGCGGCAAA	TACCTTCAACCCTTCTGTACAAGGAGCTTAAAGGCACTCCATTTCTGCGGCAAA	69	2853	NC_026145.1_-_XP_020552867.1 Sesamum indicum cultivar Zhongzhi No. 13 linkage group LG1, S_indicum_v1.0, whole genome shotgun sequence	glycine--tRNA ligase, chloroplastic/mitochondrial 2 isoform X2
	4029	NC_026157.1 - XP_011096959.1	88.235	68	8	0	2	69	138	205	6.01e-18	87.8	NC_026157.1_-_XP_011096959.1	96	60	60	0	88.24	1	1	GCAGATATGGACTTATGCTGATCAAAATCGACTCGGTTTCCTGGGTCGTCAAGAATTTTACAATGCTC	GCAGATATGGATGTATGCTGATCAAAATCGAACTGGTTTCCTTGGTCGTTCAGAATTTTACAATGCTC	69	3276	NC_026157.1_-_XP_011096959.1 Sesamum indicum cultivar Zhongzhi No. 13 linkage group LG13, S_indicum_v1.0, whole genome shotgun sequence	intersectin-1 isoform X3
	4029	NC_026157.1 - XP_011096960.1	88.235	68	8	0	2	69	138	205	6.01e-18	87.8	NC_026157.1_-_XP_011096960.1	96	60	60	0	88.24	1	1	GCAGATATGGACTTATGCTGATCAAAATCGACTCGGTTTCCTGGGTCGTCAAGAATTTTACAATGCTC	GCAGATATGGATGTATGCTGATCAAAATCGAACTGGTTTCCTTGGTCGTTCAGAATTTTACAATGCTC	69	3270	NC_026157.1_-_XP_011096960.1 Sesamum indicum cultivar Zhongzhi No. 13 linkage group LG13, S_indicum_v1.0, whole genome shotgun sequence	intersectin-1 isoform X3
	4030	NC_026149.1 - XP_011077538.1	88.889	63	7	0	5	67	2460	2522	2.56e-16	83.3	NC_026149.1_-_XP_011077538.1	91	56	56	0	88.89	1	1	GATATGGAGAGAGGAAATGCAACAAGTTTATCTGGGGAAGGCGAGCTTCCCCAAGTTCATTGA	GATATGGAGAGAGGAACTGCAGCAAGTCTATCTGGGCAAAGCTAACTTCCCCAAGTTCATTGA	69	2529	NC_026149.1_-_XP_011077538.1 Sesamum indicum cultivar Zhongzhi No. 13 linkage group LG5, S_indicum_v1.0, whole genome shotgun sequence	AMP deaminase-like
	4030	NC_026155.1 - XP_011095033.1	84.127	63	10	0	5	67	2436	2498	1.61e-12	69.8	NC_026155.1_-_XP_011095033.1	76	53	53	0	84.13	1	1	GATATGGAGAGAGGAAATGCAACAAGTTTATCTGGGGAAGGCGAGCTTCCCCAAGTTCATTGA	GATATGGAGAGAGGAGATGCAACTGGTTTATCTGGGTAAAGCAAACTTTTCCAAGTTTATTGA	69	2505	NC_026155.1_-_XP_011095033.1 Sesamum indicum cultivar Zhongzhi No. 13 linkage group LG11, S_indicum_v1.0, whole genome shotgun sequence	AMP deaminase isoform X3
	4035	NC_026149.1 - XP_011078829.1	89.831	59	6	0	1	59	924	866	8.92e-16	80.6	NC_026149.1_-_XP_011078829.1	88	53	53	0	89.83	1	-1	TGCAGATATGGTGTTGACTCTCACGTTGTGTTTTCGTCCAGCTTCAAAAGCAAGAACCT	TGCAGATATGGTGTTGACTCTGATGTTGTGTTTTCTTCCAGCTTCGAATGCAAGCACCT	69	1182	NC_026149.1_-_XP_011078829.1 Sesamum indicum cultivar Zhongzhi No. 13 linkage group LG5, S_indicum_v1.0, whole genome shotgun sequence	enoyl-[acyl-carrier-protein] reductase [NADH], chloroplastic
	4035	NC_026148.1 - XP_011075148.1	87.931	58	7	0	1	58	924	867	1.32e-13	74.3	NC_026148.1_-_XP_011075148.1	81	51	51	0	87.93	1	-1	TGCAGATATGGTGTTGACTCTCACGTTGTGTTTTCGTCCAGCTTCAAAAGCAAGAACC	TGCAGATATGGTGTTAACTCTAATGTTGTGTCTTCTTCCAGCTTCAAAAGCTAGCACC	69	1182	NC_026148.1_-_XP_011075148.1 Sesamum indicum cultivar Zhongzhi No. 13 linkage group LG4, S_indicum_v1.0, whole genome shotgun sequence	enoyl-[acyl-carrier-protein] reductase [NADH] 1, chloroplastic
	4038	NC_026150.1 - XP_011083081.1	95.161	62	3	0	7	68	1621	1682	3.32e-21	99.6	NC_026150.1_-_XP_011083081.1	109	59	59	0	95.16	1	1	TATGTTGCTCCAGAATATGCAATGACAGGACATTTGCTTGTCAAAAGCGATGTTTACAGCTA	TATGTTGCTCCTGAATATGCAATGACAGGACATTTGCTTGTCAAAAGTGATGTTTACAGTTA	69	2340	NC_026150.1_-_XP_011083081.1 Sesamum indicum cultivar Zhongzhi No. 13 linkage group LG6, S_indicum_v1.0, whole genome shotgun sequence	receptor-like serine/threonine-protein kinase ALE2 isoform X2
	4038	NC_026150.1 - XP_011083082.1	95.161	62	3	0	7	68	1609	1670	3.32e-21	99.6	NC_026150.1_-_XP_011083082.1	109	59	59	0	95.16	1	1	TATGTTGCTCCAGAATATGCAATGACAGGACATTTGCTTGTCAAAAGCGATGTTTACAGCTA	TATGTTGCTCCTGAATATGCAATGACAGGACATTTGCTTGTCAAAAGTGATGTTTACAGTTA	69	2328	NC_026150.1_-_XP_011083082.1 Sesamum indicum cultivar Zhongzhi No. 13 linkage group LG6, S_indicum_v1.0, whole genome shotgun sequence	receptor-like serine/threonine-protein kinase ALE2 isoform X2
[truncated: 3,103 more rows]
