# Supplementary material for: Genotyping Analysis by RAD-Seq Reads Is Useful to Assess the Genetic Identity and Relationships of Breeding Lines in Lavender Species Aimed at Managing Plant Variety Protection
Source: Genes (Basel). 2021 Oct 21;12(11):1656. doi: 10.3390/genes12111656 (PMC8621978; doi:10.3390/genes12111656)
Supplement: Supplementary file 1 [file genes-12-01656-s001.zip › Supplementary Table S2.xlsx]

## Sheet: Sup-Tab_CDS-S_spV2
	Supplementary Table S2: BLASTN result of the RAD-seq obtained reads against the S. splendens exome
qaccver	saccver	pident	length	mismatch	gapopen	qstart	qend	sstart	send	evalue	bitscore	sallseqid	score	nident	positive	gaps	ppos	qframe	sframe	qseq	sseq	qlen	slen	salltitles	product	KO-ids
15	KAG6397154.1	85.507	69	10	0	1	69	404	336	1.67e-15	80.6	KAG6397154.1	88	59	59	0	85.51	1	-1	TGCAGAAAAAATAAAGTGCCACCAGATGCATTCACTGGAATCAGAACTAGTATTGCTGCAATGGCTATT	TGCAGAAAAAACAAAGTGCCACCAGATGCATTCACCGGAAACAGTACTATTGCAGCAACAATGGCTATT	69	2196	KAG6397154.1	calcium permeable stress-gated cation channel	K21989
15	KAG6399424.1	84.058	69	11	0	1	69	404	336	7.08e-14	76.1	KAG6399424.1	83	58	58	0	84.06	1	-1	TGCAGAAAAAATAAAGTGCCACCAGATGCATTCACTGGAATCAGAACTAGTATTGCTGCAATGGCTATT	TGCAGAAAAAACAAAGTGCTACCAGATGCATTCACCGGAAACAGAATTATTGCAGCAACAATGGCTATT	69	2613	KAG6399424.1	calcium permeable stress-gated cation channel	K21989
30	KAG6426491.1	89.552	67	7	0	1	67	1423	1357	3.22e-18	90.6	KAG6426491.1	99	60	60	0	89.55	1	-1	TGCAGAAAAACTCCAACCCTTCATCCACCAAACCAGAATGGACACAAGCCAGCAGCAACCCGACAAA	TGCAGAAAAATTCCAACCCTTTCTCCACCAAACCCGAATGGACGCAAGCCAGCAGCACCCCAACAAA	69	1812	KAG6426491.1	Hypothetical protein	Uncharacterized protein
40	KAG6427802.1	88.71	62	7	0	4	65	379	440	1.67e-15	81.5	KAG6427802.1	89	55	55	0	88.71	1	1	AGAAAAAGCAGTGGCTTTTCCCGGGGAGTATCCAAATATAGAGGCGTCGCAAGGTATCATCA	AGAAAAAGCAGTGGATTTTCGAGGGGAGTATCTAAATATAGAGGCGTGGCAAGACATCATCA	69	1023	KAG6427802.1	AP2-like factor, ANT lineage	K09285
40	KAG6430846.1	90.909	55	5	0	4	58	466	520	2.03e-14	77.9	KAG6430846.1	85	50	50	0	90.91	1	1	AGAAAAAGCAGTGGCTTTTCCCGGGGAGTATCCAAATATAGAGGCGTCGCAAGGT	AGAAAAAGCCGTGGATTTTCGAGGGGAGTATCCAAATATAGAGGCGTGGCAAGGT	69	546	KAG6430846.1	Hypothetical protein	Uncharacterized protein
40	KAG6410438.1	85.484	62	9	0	4	65	43	104	8.63e-13	72.5	KAG6410438.1	79	53	53	0	85.48	1	1	AGAAAAAGCAGTGGCTTTTCCCGGGGAGTATCCAAATATAGAGGCGTCGCAAGGTATCATCA	AGGAAAAGCAGTGGGTTTTCTCGTGGCGTATCAAAATATCGAGGCGTCGCAAGACATCATCA	69	690	KAG6410438.1	Hypothetical protein	Uncharacterized protein
74	KAG6414757.1	89.855	69	7	0	1	69	867	799	2.64e-19	94.2	KAG6414757.1	103	62	62	0	89.86	1	-1	TGCAGAAAACAATGGTAGATTTGTTGGGCATCTGAAAACATCCCCGTGAATGTACTTCCACCCAACCTC	TGCAGAGAACAATGGTAGATTTGTTGGGCATCTGAACACGTCCTCGTGAATGTATTTCCAACCGACCTC	69	1788	KAG6414757.1	transmembrane 9 superfamily member 1	K17085
74	KAG6417284.1	85.507	69	10	0	1	69	867	799	1.67e-15	80.6	KAG6417284.1	88	59	59	0	85.51	1	-1	TGCAGAAAACAATGGTAGATTTGTTGGGCATCTGAAAACATCCCCGTGAATGTACTTCCACCCAACCTC	TGCAGAGAGCAGTGGTAGATTCGTTGGGCATCTGAACACGTCCTCGTGAATGTATTTCCAACCAACTTC	69	1641	KAG6417284.1	transmembrane 9 superfamily member 1	K17085
90	KAG6391571.1	89.091	55	6	0	1	55	652	598	2.47e-13	73.4	KAG6391571.1	80	49	49	0	89.09	1	-1	TGCAGAAAACGAGTTCAAATCCATACAGGAGAGATTGGTGGATTTCTGAAAGTGA	TGCAGAAGGTGAGTTCAAATCCATACAAGAGAGAGTGGTGGATTTCTGAAAGAGA	69	1437	KAG6391571.1	Hypothetical protein	Uncharacterized protein
90	KAG6391572.1	89.091	55	6	0	1	55	700	646	2.47e-13	73.4	KAG6391572.1	80	49	49	0	89.09	1	-1	TGCAGAAAACGAGTTCAAATCCATACAGGAGAGATTGGTGGATTTCTGAAAGTGA	TGCAGAAGGTGAGTTCAAATCCATACAAGAGAGAGTGGTGGATTTCTGAAAGAGA	69	1974	KAG6391572.1	Hypothetical protein	Uncharacterized protein
90	KAG6389386.1	88.889	54	6	0	3	56	116	63	8.63e-13	71.6	KAG6389386.1	78	48	48	0	88.89	1	-1	CAGAAAACGAGTTCAAATCCATACAGGAGAGATTGGTGGATTTCTGAAAGTGAA	CAGAAGTTGAGTTCAAAACCATACAAGAGAGATTGGTGGATTTGTGAAAGTGAA	69	984	KAG6389386.1	Hypothetical protein	Uncharacterized protein
100	KAG6396257.1	89.394	66	7	0	4	69	878	943	1.12e-17	88.7	KAG6396257.1	97	59	59	0	89.39	1	1	AGAAAACTACCAAGAATGGCCTGCATATTCTTCTAGGAGGCGTTTGTGCATTGACTTTTGTAATTT	AGAAAACTGCCAAAAATGGCCTGCATATTCTTCTTGGAGGAGTCTGTGCATTGACTGTTGTAGTTT	69	1071	KAG6396257.1	Hypothetical protein	Uncharacterized protein
100	KAG6398540.1	87.879	66	8	0	4	69	878	943	1.37e-16	84.2	KAG6398540.1	92	58	58	0	87.88	1	1	AGAAAACTACCAAGAATGGCCTGCATATTCTTCTAGGAGGCGTTTGTGCATTGACTTTTGTAATTT	AGAAAACTGCCAAAAGTGGCCTGCATATTCTTCTTGGAGGAGTCTGTGCATTGACTGTTGTAGTTT	69	1071	KAG6398540.1	Hypothetical protein	Uncharacterized protein
105	KAG6409625.1	92.647	68	5	0	1	68	87	20	1.78e-21	101	KAG6409625.1	111	63	63	0	92.65	1	-1	TGCAGAAAACTCAGAATATGGAGGATCTTGCACCGGTAGGCTTAGTATGTCTTCCATCCTTGCCATCT	TGCAGAAAACTCGGAATAAGGAGGATCTTGCACTGGTAGGTTTAGTATGTCTTCCATCCTCGCCATCT	69	2094	KAG6409625.1	Hypothetical protein	Uncharacterized protein
105	KAG6387963.1	91.176	68	6	0	1	68	87	20	2.17e-20	96.9	KAG6387963.1	106	62	62	0	91.18	1	-1	TGCAGAAAACTCAGAATATGGAGGATCTTGCACCGGTAGGCTTAGTATGTCTTCCATCCTTGCCATCT	TGCAGAAAACTCGGAATAAGGAGGATCTTGAACCGGTAGGTTTAGTATGTCTTCCATCCTCGACATCT	69	2094	KAG6387963.1	Hypothetical protein	Uncharacterized protein
108	KAG6413403.1	89.091	55	6	0	15	69	330	276	2.47e-13	73.4	KAG6413403.1	80	49	49	0	89.09	1	-1	CTTGATACAACCGGCGTGTTTGATGGCGGAAATCAGAGGCTTCTGATCATGAACT	CTTGATGCAACCGATACGTTTGATGGCCGAAATCAGAGGCTTCTGATCATGAACT	69	939	KAG6413403.1	Hypothetical protein	Uncharacterized protein
108	KAG6410803.1	87.273	55	7	0	15	69	330	276	1.05e-11	68.9	KAG6410803.1	75	48	48	0	87.27	1	-1	CTTGATACAACCGGCGTGTTTGATGGCGGAAATCAGAGGCTTCTGATCATGAACT	CTTGATGCAACCGACACGTTTGATGGCCGAAGTAAGAGGCTTCTGATCATGAACT	69	939	KAG6410803.1	Hypothetical protein	Uncharacterized protein
109	KAG6401041.1	83.333	66	11	0	1	66	506	441	3.01e-12	70.7	KAG6401041.1	77	55	55	0	83.33	1	-1	TGCAGAAAACTGGAGAGAGAAAACCCAGCAAATAAGTTGCAAGCAACGTAGGTGTAAGGAATGCCT	TGCAGAAAATTGGAGAGCGCAAAGCCGTCAAACAAGTTGCACACGACGTAGGTGTAAGGAATGGCT	69	828	KAG6401041.1	Hypothetical protein	Uncharacterized protein
111	KAG6430119.1	85.507	69	10	0	1	69	1603	1535	1.67e-15	80.6	KAG6430119.1	88	59	59	0	85.51	1	-1	TGCAGAAAACTTCCCAATGTTCACCAAAATGAGCTTTCCAATCCTCTTCATTGCCGTAATGAGGCAGGT	TGTAGAAAACTTCCCAGTGAGGACCAAAATGAGCTTCCCACTCCTCTTCAGTGCTGTAATGGGGCAGGT	69	1689	KAG6430119.1	cytokinin dehydrogenase [EC:1.5.99.12]	K00279
111	KAG6427108.1	82.609	69	12	0	1	69	1663	1595	8.63e-13	71.6	KAG6427108.1	78	57	57	0	82.61	1	-1	TGCAGAAAACTTCCCAATGTTCACCAAAATGAGCTTTCCAATCCTCTTCATTGCCGTAATGAGGCAGGT	TGTAGAAAACTTCCCAGTGGGGGCCGAAATGAGCTTCCCACTCCTCTTCAGTGCTGTAATGGGGCAGGT	69	1749	KAG6427108.1	cytokinin dehydrogenase [EC:1.5.99.12]	K00279
125	KAG6399962.1	94.231	52	3	0	1	52	1092	1143	1.67e-15	81.5	KAG6399962.1	89	49	49	0	94.23	1	1	TGCAGAAAAGACAGCTCTTGGTGGGCTATCCCTTGATGGCTTTTTGTCATTG	TGCAGAAAAGACGGCTCTTGGAGGGCTATCCCTTGATGGCTTTTTGTCACTG	69	1950	KAG6399962.1	mitochondrial Rho GTPase 1 [EC:3.6.5.-]	K07870
125	KAG6397736.1	92.308	52	4	0	1	52	1089	1140	2.03e-14	77	KAG6397736.1	84	48	48	0	92.31	1	1	TGCAGAAAAGACAGCTCTTGGTGGGCTATCCCTTGATGGCTTTTTGTCATTG	TGCAGAAAAGACGGCTCTTGGAGGGCTATCTCTTGATGGCTTTTTGTCACTG	69	1947	KAG6397736.1	mitochondrial Rho GTPase 1 [EC:3.6.5.-]	K07870
125	KAG6429714.1	90.385	52	5	0	1	52	1089	1140	8.63e-13	72.5	KAG6429714.1	79	47	47	0	90.38	1	1	TGCAGAAAAGACAGCTCTTGGTGGGCTATCCCTTGATGGCTTTTTGTCATTG	TGCAGAGAAGACGGCTCTTGGAGGGCTATCCCTTGATGGATTTTTGTCACTG	69	1710	KAG6429714.1	Hypothetical protein	Uncharacterized protein
144	KAG6407681.1	82.09	67	12	0	3	69	1280	1346	1.05e-11	68	KAG6407681.1	74	55	55	0	82.09	1	1	CAGAAAAGCAGGTTCAGCTGTTCCTCTTATCTGGTCAAGGCACGTGTATTGCCCCAAATGTAAGTGG	CAGAAAAACAGATTCAGCTGTTCTTTTTATCTGGCCAAGGCACATGTATCATCCCAGGTGGAAGTGG	69	2853	KAG6407681.1	type I protein arginine methyltransferase [EC:2.1.1.319]	K11437
144	KAG6407666.1	82.09	67	12	0	3	69	1730	1796	1.05e-11	68	KAG6407666.1	74	55	55	0	82.09	1	1	CAGAAAAGCAGGTTCAGCTGTTCCTCTTATCTGGTCAAGGCACGTGTATTGCCCCAAATGTAAGTGG	CAGAAAAACAGATTCAGCTGTTCTTTTTATCTGGCCAAGGCACATGTATCATCCCAGGTGGAAGTGG	69	3135	KAG6407666.1	integrator complex subunit 7	K13144
149	KAG6393382.1	84.746	59	9	0	11	69	1948	2006	3.67e-11	67.1	KAG6393382.1	73	50	50	0	84.75	1	1	GAGAACGTCTCTTCAAACGCAGCTGATGGCATTCTTTCTAACGAGCACTTTCAAAGAAT	GAGAACGTCACTTCATCCTCAAATGATGGAATTCTTTCTAACGAGGACTTCCAAAGAAT	69	2376	KAG6393382.1	protein SDA1	K14856
158	KAG6426675.1	92.754	69	5	0	1	69	1839	1771	5.1e-22	103	KAG6426675.1	113	64	64	0	92.75	1	-1	TGCAGAAAAGGCTGGTTTTGCTACTATCAAGGAGTTGTACATAGATGATCCTTTTTCCCAAACCATGCT	TGCAGAAAGGGCGGGTTTTGCTACAATCAAGGAGTTGTACATTGATGAGCCTTTTTCCCAAACCATGCT	69	3030	KAG6426675.1	retinoblastoma-like protein 1	K04681
158	KAG6429304.1	92.754	69	5	0	1	69	1809	1741	5.1e-22	103	KAG6429304.1	113	64	64	0	92.75	1	-1	TGCAGAAAAGGCTGGTTTTGCTACTATCAAGGAGTTGTACATAGATGATCCTTTTTCCCAAACCATGCT	TGCAGAAAGGGCGGGTTTTGCTACAATCAAGGAGTTGTACATTGATGAGCCTTTTTCCCAAACCATGCT	69	3009	KAG6429304.1	retinoblastoma-like protein 1	K04681
158	KAG6422469.1	91.304	69	6	0	1	69	1989	1921	6.21e-21	98.7	KAG6422469.1	108	63	63	0	91.3	1	-1	TGCAGAAAAGGCTGGTTTTGCTACTATCAAGGAGTTGTACATAGATGATCCTTTTTCCCAAACCATGCT	TGCAGAAAGGACTGGTTTTGCTACAATCAAGGAGTTATACATCGATGAGCCTTTTTCCCAAACCATGCT	69	3180	KAG6422469.1	retinoblastoma-like protein 1	K04681
167	KAG6389770.1	90.323	62	6	0	1	62	2361	2422	3.92e-17	86	KAG6389770.1	94	56	56	0	90.32	1	1	TGCAGAAAAGTGGAACAGCGCAGGTGATACTTCTGCTAGTAAAGCAGCCTGGGGACAGTCTG	TGCAGAAAAGTGGAACAGCGGAGGTGATGCTTCTGCTAGTAAAGCGGTCTGGGGTCAGACTG	69	4572	KAG6389770.1	Hypothetical protein	Uncharacterized protein
167	KAG6391494.1	87.931	58	7	0	5	62	2302	2359	2.47e-13	74.3	KAG6391494.1	81	51	51	0	87.93	1	1	GAAAAGTGGAACAGCGCAGGTGATACTTCTGCTAGTAAAGCAGCCTGGGGACAGTCTG	GAAAAGTGGAACAGCGGAGGTGATGCTTCTGCTAGTAAAGCGATCTGGGGTCAGACTG	69	4575	KAG6391494.1	Hypothetical protein	Uncharacterized protein
171	KAG6433514.1	87.097	62	8	0	1	62	504	565	2.03e-14	77	KAG6433514.1	84	54	54	0	87.1	1	1	TGCAGAAAAGTTGCTCTCAAATCATAATTGTTTTCTGGACTTTTTGAAGTCCCAAAGCGCAG	TGCAGAAAAGTGGTTCTCAAATCATAATTATTTTCTAGATTTTTTAAAGTCTCAAAGCCCAG	69	5247	KAG6433514.1	E3 ubiquitin-protein ligase listerin [EC:2.3.2.27]	K22377
171	KAG6436916.1	87.097	62	8	0	1	62	903	964	2.03e-14	77	KAG6436916.1	84	54	54	0	87.1	1	1	TGCAGAAAAGTTGCTCTCAAATCATAATTGTTTTCTGGACTTTTTGAAGTCCCAAAGCGCAG	TGCAGAAAAGTTGTTCTCAAATCATAATTATTTTCTAGATTTTCTAAAGTCTCAAAGCCCAG	69	5706	KAG6436916.1	E3 ubiquitin-protein ligase listerin [EC:2.3.2.27]	K22377
189	KAG6409399.1	86.765	68	8	1	2	69	81	15	5.82e-15	79.7	KAG6409399.1	87	59	59	1	86.76	1	-1	GCAGAAAATATGAACTGCTTGAGACCCCATTGATCATGGGCTAATGGAGTAAGATTTCAGGAAACCGC	GCAGAAAAATTGAACTGCTTGAGACCCCATTGAGCATGGGCGACT-GAGCATGATTTCAGAAAACCGC	69	807	KAG6409399.1	Hypothetical protein	Uncharacterized protein
201	KAG6383019.1	88.525	61	7	0	1	61	804	744	5.82e-15	79.7	KAG6383019.1	87	54	54	0	88.52	1	-1	TGCAGAAAATCGAAAGCTCGGTCCCATTTTCTTGACCAACACAGCATCATCCTCCACAGCT	TGCAGAGAAACGAAAGCTCTGTCCCATTTTCTTGACCAACGCATCATCATCATCCGCAGCT	69	1023	KAG6383019.1	Hypothetical protein	Uncharacterized protein
201	KAG6386131.1	88.525	61	7	0	1	61	798	738	5.82e-15	79.7	KAG6386131.1	87	54	54	0	88.52	1	-1	TGCAGAAAATCGAAAGCTCGGTCCCATTTTCTTGACCAACACAGCATCATCCTCCACAGCT	TGCAGAGAAACGAAAGCTCTGTCCCATTTTCTTGACCAACGCATCATCATCATCCGCAGCT	69	1017	KAG6386131.1	Hypothetical protein	Uncharacterized protein
201	KAG6412237.1	88.525	61	7	0	1	61	795	735	5.82e-15	79.7	KAG6412237.1	87	54	54	0	88.52	1	-1	TGCAGAAAATCGAAAGCTCGGTCCCATTTTCTTGACCAACACAGCATCATCCTCCACAGCT	TGTAGAAAAACGAAAGCTGTGTCCCATTTTCTTGACCAACGCAGCATCATCATCCGCAGCT	69	1014	KAG6412237.1	Hypothetical protein	Uncharacterized protein
202	KAG6383019.1	91.803	61	5	0	1	61	804	744	1.12e-17	88.7	KAG6383019.1	97	56	56	0	91.8	1	-1	TGCAGAAAATCGAAAGCTCTGTCCCATTTTCTTGACCAACACAGCATCATCCTCCGCAGCT	TGCAGAGAAACGAAAGCTCTGTCCCATTTTCTTGACCAACGCATCATCATCATCCGCAGCT	69	1023	KAG6383019.1	Hypothetical protein	Uncharacterized protein
202	KAG6386131.1	91.803	61	5	0	1	61	798	738	1.12e-17	88.7	KAG6386131.1	97	56	56	0	91.8	1	-1	TGCAGAAAATCGAAAGCTCTGTCCCATTTTCTTGACCAACACAGCATCATCCTCCGCAGCT	TGCAGAGAAACGAAAGCTCTGTCCCATTTTCTTGACCAACGCATCATCATCATCCGCAGCT	69	1017	KAG6386131.1	Hypothetical protein	Uncharacterized protein
202	KAG6412237.1	91.803	61	5	0	1	61	795	735	1.12e-17	88.7	KAG6412237.1	97	56	56	0	91.8	1	-1	TGCAGAAAATCGAAAGCTCTGTCCCATTTTCTTGACCAACACAGCATCATCCTCCGCAGCT	TGTAGAAAAACGAAAGCTGTGTCCCATTTTCTTGACCAACGCAGCATCATCATCCGCAGCT	69	1014	KAG6412237.1	Hypothetical protein	Uncharacterized protein
211	KAG6388684.1	82.609	69	12	0	1	69	1182	1250	8.63e-13	71.6	KAG6388684.1	78	57	57	0	82.61	1	1	TGCAGAAAATGCAATCCACCTTCGCCGGGTTGATGAGGCGGTCAACAAGGCTGTAATGGCGGCAAATAG	TGCTGAGAATGCAATCCACCTCCGCCGGGTTGATGAGCAAGTGAACAAGGCCGTGGTGGCTGCAAACAG	69	1332	KAG6388684.1	Hypothetical protein	Uncharacterized protein
211	KAG6390387.1	82.609	69	12	0	1	69	1164	1232	8.63e-13	71.6	KAG6390387.1	78	57	57	0	82.61	1	1	TGCAGAAAATGCAATCCACCTTCGCCGGGTTGATGAGGCGGTCAACAAGGCTGTAATGGCGGCAAATAG	TGCAGAGAATGCAATCCACCTCCGCCGGGTTGATGAGCAAGTGAACAAGGCCGTGGTGGCTGCGAACAG	69	1314	KAG6390387.1	Hypothetical protein	Uncharacterized protein
211	KAG6432626.1	82.609	69	12	0	1	69	1134	1202	8.63e-13	71.6	KAG6432626.1	78	57	57	0	82.61	1	1	TGCAGAAAATGCAATCCACCTTCGCCGGGTTGATGAGGCGGTCAACAAGGCTGTAATGGCGGCAAATAG	TGCGGAGAATGCAATCCACCTCCCCCGGGTTGATGAGCAAGTGAACAAGGCTGTGGTGGCCGCAAACAG	69	1284	KAG6432626.1	Hypothetical protein	Uncharacterized protein
215	KAG6428696.1	84.375	64	10	0	5	68	1448	1385	8.63e-13	71.6	KAG6428696.1	78	54	54	0	84.38	1	-1	GAAAATGCAGGAAGTCCTGGTTTTTCCAAAACTGGCTTATGACTGCTCTTGTCAATGTCAGATG	GAAAATGAAGGGAATCCCGGTTTTCCCAAAACTAACTTATGACTGCTCTTGTCAACATCTGATG	69	2511	KAG6428696.1	solute carrier family 35 (adenosine 3'-phospho 5'-phosphosulfate transporter), member B3	K15277
215	KAG6431793.1	82.353	68	12	0	1	68	444	377	3.01e-12	69.8	KAG6431793.1	76	56	56	0	82.35	1	-1	TGCAGAAAATGCAGGAAGTCCTGGTTTTTCCAAAACTGGCTTATGACTGCTCTTGTCAATGTCAGATG	TGAAGAAAATGAAGGGAATCCCGGTTTGCCCAAAACTAACTTATGACTGCTCTTGTCAACATCTGATG	69	1380	KAG6431793.1	nuclear pore complex protein Nup50	K14295
221	KAG6383668.1	84.058	69	11	0	1	69	229	297	7.08e-14	76.1	KAG6383668.1	83	58	58	0	84.06	1	1	TGCAGAAAATGCGACGTTTCTATACACACAGCAAACTCATTTGTGTCACTGCATCAAAGGTTTCTACTC	TGCAGAAAATGTGATGTTGCTATACACTCAGCAAATTCCTTAGTATCAGGGCATCAAAGGTTTTTACTC	69	879	KAG6383668.1	Hypothetical protein	Uncharacterized protein
221	KAG6385402.1	84.058	69	11	0	1	69	229	297	7.08e-14	76.1	KAG6385402.1	83	58	58	0	84.06	1	1	TGCAGAAAATGCGACGTTTCTATACACACAGCAAACTCATTTGTGTCACTGCATCAAAGGTTTCTACTC	TGCAGAAAGTGTGATGTTGCTATACACACAGCAAATTCCTTAGTATCAGGGCATCAAAGGTTTTTACTC	69	879	KAG6385402.1	Hypothetical protein	Uncharacterized protein
221	KAG6387278.1	84.058	69	11	0	1	69	229	297	7.08e-14	76.1	KAG6387278.1	83	58	58	0	84.06	1	1	TGCAGAAAATGCGACGTTTCTATACACACAGCAAACTCATTTGTGTCACTGCATCAAAGGTTTCTACTC	TGCAGAAAATGTGATGTTGCTATACACTCAGCAAATTCCTTAGTATCAGGGCATCAAAGGTTTTTACTC	69	879	KAG6387278.1	Hypothetical protein	Uncharacterized protein
231	KAG6405045.1	88.889	54	6	0	16	69	2912	2859	8.63e-13	71.6	KAG6405045.1	78	48	48	0	88.89	1	-1	CTGTCATTGAGTCCTCCAGTCTTCCTAACAATTGGAATTGTCCCATATCTCATA	CTGTCGTTGAGTCCTCCAGTCTTCCTAACTATGGGAACTGACCCGTATCTCATA	69	3159	KAG6405045.1	starch synthase [EC:2.4.1.21]	K00703
231	KAG6416693.1	88.889	54	6	0	16	69	2933	2880	8.63e-13	71.6	KAG6416693.1	78	48	48	0	88.89	1	-1	CTGTCATTGAGTCCTCCAGTCTTCCTAACAATTGGAATTGTCCCATATCTCATA	CTGTCATTGAGTCCTCCAGTCTTCCTTACGATGGGAACTGACCCGTATCTCATA	69	3180	KAG6416693.1	starch synthase [EC:2.4.1.21]	K00703
231	KAG6407223.1	87.037	54	7	0	16	69	2819	2766	3.67e-11	67.1	KAG6407223.1	73	47	47	0	87.04	1	-1	CTGTCATTGAGTCCTCCAGTCTTCCTAACAATTGGAATTGTCCCATATCTCATA	CTGTCGTTGAGTCCTCCAGTCTTCCTAACGATGGGAACTGATCCGTATCTCATA	69	3066	KAG6407223.1	Hypothetical protein	Uncharacterized protein
238	KAG6391979.1	95.652	69	3	0	1	69	2828	2896	9.84e-25	112	KAG6391979.1	123	66	66	0	95.65	1	1	TGCAGAAAATTTATGAGGATGAGTGGGCAAATTTTATGGAACGTATGCACAGGGAAGGACTGCGAGATG	TGCAGAGAATTTATGATGATGAGTGGGCAAATTTTATGGAACGTATGCACAGGGAAGGACTGCAAGATG	69	5331	KAG6391979.1	callose synthase [EC:2.4.1.-]	K11000
238	KAG6393697.1	95.652	69	3	0	1	69	2840	2908	9.84e-25	112	KAG6393697.1	123	66	66	0	95.65	1	1	TGCAGAAAATTTATGAGGATGAGTGGGCAAATTTTATGGAACGTATGCACAGGGAAGGACTGCGAGATG	TGCAGAGAATTTATGATGATGAGTGGGCAAATTTTATGGAACGTATGCACAGGGAAGGACTGCAAGATG	69	5343	KAG6393697.1	callose synthase [EC:2.4.1.-]	K11000
247	KAG6430976.1	82.609	69	12	0	1	69	261	193	8.63e-13	71.6	KAG6430976.1	78	57	57	0	82.61	1	-1	TGCAGAAACAAAAGCCCGGCCCGGTACGGTGGACCATATGGATCTTGAAGAGTTGGATTTGTGGCAAAC	TGCAGAGACGAAGGCCCGGCCCGGGACAGTGGACCATATGGATCTTGAGAGGCTGGGCTTGCGGCAAAC	69	2325	KAG6430976.1	Hypothetical protein	Uncharacterized protein
247	KAG6427932.1	82.09	67	12	0	2	68	260	194	1.05e-11	68	KAG6427932.1	74	55	55	0	82.09	1	-1	GCAGAAACAAAAGCCCGGCCCGGTACGGTGGACCATATGGATCTTGAAGAGTTGGATTTGTGGCAAA	GCAGAGACGAAGGCCCGGCCCGGGACAGTGGACCATATCGATCTTGAGAGGTTGGGCTTGCGGCAAA	69	2757	KAG6427932.1	Hypothetical protein	Uncharacterized protein
248	KAG6412482.1	91.304	69	6	0	1	69	705	637	6.21e-21	98.7	KAG6412482.1	108	63	63	0	91.3	1	-1	TGCAGAAACAAAATCCTTGCCATATTTCTTCTGGAAAACATCACGTATGGACAGTAACTCTGGAATCTC	TGCAGAAACAAAATCCTTGCCATATTTCTTCTGGAATATATCTCGTATGGCCAGTAACTCTGGGAGCTC	69	1164	KAG6412482.1	Hypothetical protein	Uncharacterized protein
248	KAG6385865.1	88.406	69	8	0	1	69	456	388	3.22e-18	89.7	KAG6385865.1	98	61	61	0	88.41	1	-1	TGCAGAAACAAAATCCTTGCCATATTTCTTCTGGAAAACATCACGTATGGACAGTAACTCTGGAATCTC	TGCAGAAACAAAATCCTTGCCATATTTCTTCTGGAATACGTCTCGTATAGCTAGTAACTCTGGTAGCTC	69	1434	KAG6385865.1	Hypothetical protein	Uncharacterized protein
255	KAG6434457.1	86.765	68	9	0	1	68	458	391	4.77e-16	83.3	KAG6434457.1	91	59	59	0	86.76	1	-1	TGCAGAAACAAATCCAACCCGAATCCGAGTTTCAGCATCAACCCATGAATCTGCACTCCTCTGCTCAA	TGCAGGAATAAATCAGACCCGAACCCGAGTTTCAACATCAGCCCATGAATCTGAATTCCTCTGCTCAA	69	1818	KAG6434457.1	Hypothetical protein	Uncharacterized protein
255	KAG6437791.1	86.765	68	9	0	1	68	458	391	4.77e-16	83.3	KAG6437791.1	91	59	59	0	86.76	1	-1	TGCAGAAACAAATCCAACCCGAATCCGAGTTTCAGCATCAACCCATGAATCTGCACTCCTCTGCTCAA	TGCAGGAATAAATCAGACCCGAACCCGAGTTTCAACATCAGCCCATGAATCTGGATTCCTCTGCTCAA	69	1881	KAG6437791.1	Hypothetical protein	Uncharacterized protein
263	KAG6383167.1	89.706	68	7	0	2	69	71	4	9.22e-19	92.4	KAG6383167.1	101	61	61	0	89.71	1	-1	GCAGAAACAAGGTCAACGCTTATTTTAGTGTTCTGCGCTGCTTCCCATTCCAACTCCTGCTGCTTCTC	GCGGAAACAAGGTCGACGTTGATCTCAGTGTTCTGTGCTGCTTCCCATTCCAACTCCTGCTGCTTCTC	69	2631	KAG6383167.1	Hypothetical protein	Uncharacterized protein
263	KAG6394310.1	89.706	68	7	0	2	69	71	4	9.22e-19	92.4	KAG6394310.1	101	61	61	0	89.71	1	-1	GCAGAAACAAGGTCAACGCTTATTTTAGTGTTCTGCGCTGCTTCCCATTCCAACTCCTGCTGCTTCTC	GCGGAAACAAGGTCGACGTTGATCTCAGTGTTCTGTGCTGCTTCCCATTCCAACTCCTGCTGCTTCTC	69	2313	KAG6394310.1	Hypothetical protein	Uncharacterized protein
263	KAG6392558.1	88.235	68	8	0	2	69	71	4	1.12e-17	87.8	KAG6392558.1	96	60	60	0	88.24	1	-1	GCAGAAACAAGGTCAACGCTTATTTTAGTGTTCTGCGCTGCTTCCCATTCCAACTCCTGCTGCTTCTC	GCGGAAACAAGGTCGACGTTGATCTCAGTGTTCTGTGCTGCCTCCCATTCCAACTCCTGCTGCTTCTC	69	2949	KAG6392558.1	Hypothetical protein	Uncharacterized protein
265	KAG6425903.1	87.097	62	8	0	1	62	326	387	2.03e-14	77	KAG6425903.1	84	54	54	0	87.1	1	1	TGCAGAAACAAGTCTCTCAATTAGTATATGAAAACAGCTACTTTCGCCAGCATACACCAAAT	TGCAGAAGCAAGTATCACACTTGGTGTATGAAAACAGTTACTTTCGCCAGCATACACCGAAT	69	2544	KAG6425903.1	homeobox-leucine zipper protein	K09338
265	KAG6428961.1	87.097	62	8	0	1	62	461	522	2.03e-14	77	KAG6428961.1	84	54	54	0	87.1	1	1	TGCAGAAACAAGTCTCTCAATTAGTATATGAAAACAGCTACTTTCGCCAGCATACACCAAAT	TGCAGAAGCAAGTATCACACTTGGTGTATGAAAACAGTTACTTTCGCCAGCATACACCGAAT	69	2679	KAG6428961.1	homeobox-leucine zipper protein	K09338
265	KAG6398067.1	85.484	62	9	0	1	62	272	333	8.63e-13	72.5	KAG6398067.1	79	53	53	0	85.48	1	1	TGCAGAAACAAGTCTCTCAATTAGTATATGAAAACAGCTACTTTCGCCAGCATACACCAAAT	TGCAGAAACAAGTATCGCATTTGGTGTATGAGAACAGTTACTTTCGTCAGCATACACCGAAT	69	2484	KAG6398067.1	homeobox-leucine zipper protein	K09338
279	KAG6416685.1	84.058	69	11	0	1	69	311	243	7.08e-14	76.1	KAG6416685.1	83	58	58	0	84.06	1	-1	TGCAGAAACACATCCCCATCGCTCTCTTCACCTTCGCTCGACGAAAAGATATATCCGAAAGGTCTGTCA	TGCAGAAAAACATCCCCATCGCTGTCTTCACCTTCGCTTGATGAATACATATATTCAAAGGGCCTATCA	69	1527	KAG6416685.1	phospho-N-acetylmuramoyl-pentapeptide-transferase [EC:2.7.8.13]	K01000
282	KAG6404756.1	89.394	66	7	0	4	69	2325	2260	1.12e-17	88.7	KAG6404756.1	97	59	59	0	89.39	1	-1	AGAAACACCATATGGCCCATAGTTGCCAGGCACTCCAATTGGAGCAGAGGTTCCTATATTTGCTCC	AGAAAGACCATACGGCCCATAGTTGCCAGGTACTCCAGTGGGAGCAGAGCTTCCTATATTTGGTCC	69	2730	KAG6404756.1	Hypothetical protein	Uncharacterized protein
282	KAG6406964.1	86.957	69	9	0	1	69	2439	2371	1.37e-16	85.1	KAG6406964.1	93	60	60	0	86.96	1	-1	TGCAGAAACACCATATGGCCCATAGTTGCCAGGCACTCCAATTGGAGCAGAGGTTCCTATATTTGCTCC	TGGAGAAAGACCATACGGCCCATAGTTTCCAGGTACTCCAGTGGGAGCAGAGCTTCCTATATTTGGTCC	69	2841	KAG6406964.1	Hypothetical protein	Uncharacterized protein
282	KAG6419635.1	83.077	65	11	0	5	69	2306	2242	1.05e-11	68.9	KAG6419635.1	75	54	54	0	83.08	1	-1	GAAACACCATATGGCCCATAGTTGCCAGGCACTCCAATTGGAGCAGAGGTTCCTATATTTGCTCC	GAAAGATCGTACTGCCCGTAGTTGCCAGGAACTCCAGTGGGAGCAGAGCTTCCTGTATTTGCTCC	69	2715	KAG6419635.1	Hypothetical protein	Uncharacterized protein
289	KAG6405952.1	86.567	67	9	0	3	69	1459	1525	1.67e-15	81.5	KAG6405952.1	89	58	58	0	86.57	1	1	CAGAAACAGAATCAAGAGCTGGCAGAAGAAAAGGAGCGGCTGCTTGAAGAAATCGAGAGGATAATTT	CAGAAACAGAATCAAGATCTGGGAGATGAAAAGGAGAGACTACTTGAAGAGATTGAGAGGATCATTT	69	1545	KAG6405952.1	Hypothetical protein	Uncharacterized protein
289	KAG6408250.1	85.075	67	10	0	3	69	1381	1447	2.03e-14	77	KAG6408250.1	84	57	57	0	85.07	1	1	CAGAAACAGAATCAAGAGCTGGCAGAAGAAAAGGAGCGGCTGCTTGAAGAAATCGAGAGGATAATTT	CAGAAACAGAATCAAGATCTGGGAGATGAAAAGGCGAGACTACTTGAAGAGATTGAGAGGATCATTT	69	1467	KAG6408250.1	Hypothetical protein	Uncharacterized protein
295	KAG6406418.1	87.879	66	5	1	3	65	2903	2968	4.77e-16	82.4	KAG6406418.1	90	58	58	3	87.88	1	1	CAGAAACAGCTATGCATGTCCCACATCAAACTTTTGCTAAT---GTGGAGCAAAGAAATTGGAATG	CAGAAACATCTATGCATGCCCCACATCCAAGTTTTGCTAATAACGTGGAGCAAAGGAATTGGAATG	69	5256	KAG6406418.1	Hypothetical protein	Uncharacterized protein
295	KAG6408758.1	86.364	66	6	1	3	65	2996	3061	2.03e-14	77.9	KAG6408758.1	85	57	57	3	86.36	1	1	CAGAAACAGCTATGCATGTCCCACATCAAACTTTTGCTAAT---GTGGAGCAAAGAAATTGGAATG	CAGAAACATCTATGCATGCCCCACATCCACCTTCTGCTAATAACGTGGAGCAAAGGAATTGGAATG	69	5580	KAG6408758.1	Hypothetical protein	Uncharacterized protein
295	KAG6408757.1	83.333	66	8	1	3	65	2900	2965	1.05e-11	68.9	KAG6408757.1	75	55	55	3	83.33	1	1	CAGAAACAGCTATGCATGTCCCACATCAAACTTTTGCTAAT---GTGGAGCAAAGAAATTGGAATG	CAGAAACATCTACGCATGCCCCACATTCAACTTTTTCCAATAACGTGGAGCAAAGGAATTGGAATG	69	5271	KAG6408757.1	Hypothetical protein	Uncharacterized protein
296	KAG6434950.1	90.741	54	5	0	1	54	735	682	7.08e-14	76.1	KAG6434950.1	83	49	49	0	90.74	1	-1	TGCAGAAACAGCTGCTTGTCCCAAGTGTGACCGAAAATCATTGCTGATGTTTGG	TGCAGACACAGCTGCTTGTCCCAAGTGTGACCGAAAATCACCACTGATGTTCGG	69	2535	KAG6434950.1	3-methylcrotonyl-CoA carboxylase alpha subunit [EC:6.4.1.4]	K01968
297	KAG6419808.1	85.507	69	10	0	1	69	600	532	1.67e-15	80.6	KAG6419808.1	88	59	59	0	85.51	1	-1	TGCAGAAACAGCTTTTCTAATGGCCCATCCATGGTACGGAGCAAAAACTTGTCCGTAGGATCTTGAAGC	TGCAGCTACAGCTTTTCTAATGGCCCATCCATGATATGGAGAAAAGACTTGTGCGTAAGCTTTTGAAGC	69	762	KAG6419808.1	Hypothetical protein	Uncharacterized protein
297	KAG6422798.1	82.609	69	12	0	1	69	522	454	8.63e-13	71.6	KAG6422798.1	78	57	57	0	82.61	1	-1	TGCAGAAACAGCTTTTCTAATGGCCCATCCATGGTACGGAGCAAAAACTTGTCCGTAGGATCTTGAAGC	TGCAGCTACAGCTTTTCTAATGGCCCATCCATGATATGGAGAAAAGACTTGTGAATAAGCTTTTGAAGC	69	684	KAG6422798.1	Hypothetical protein	Uncharacterized protein
300	KAG6396390.1	95.385	65	3	0	5	69	2532	2596	1.46e-22	104	KAG6396390.1	115	62	62	0	95.38	1	1	GAAACAGTCACGCCCACCACAAGACAGGACAATGGTTGTTGCAACCCTTGCTGAAGTTGCACAGC	GAAACAATCACGCCCACCACAGGACAGGACAATGGTTGTTGCAACCCTTGCTGAAGTTGCTCAGC	69	3231	KAG6396390.1	importin-4	K20221
300	KAG6398678.1	95.385	65	3	0	5	69	2499	2563	1.46e-22	104	KAG6398678.1	115	62	62	0	95.38	1	1	GAAACAGTCACGCCCACCACAAGACAGGACAATGGTTGTTGCAACCCTTGCTGAAGTTGCACAGC	GAAACAATCACGCCCACCACAGGACAGGACAATGGTTGTTGCAACCCTTGCTGAAGTTGCTCAGC	69	3150	KAG6398678.1	importin-4	K20221
303	KAG6395614.1	89.855	69	7	0	1	69	1773	1841	2.64e-19	94.2	KAG6395614.1	103	62	62	0	89.86	1	1	TGCAGAAACATACATAAATATGAACGGGAATCCAGATGAAATTGAGTGGTTCCCTACTCCCGTATTTCA	TGCAGAGACATACATAAATATGAATGGGAACCCAGACGAAATTGAGTGGATCCCTACTCCATTATTTCA	69	2331	KAG6395614.1	exocyst complex component 8	K19986
303	KAG6397885.1	88.406	69	8	0	1	69	1947	2015	3.22e-18	89.7	KAG6397885.1	98	61	61	0	88.41	1	1	TGCAGAAACATACATAAATATGAACGGGAATCCAGATGAAATTGAGTGGTTCCCTACTCCCGTATTTCA	TGCAGGGACATACATAAATATGAATGGGAACCCAGACGAAATTGAGTGGATCCCTACTCCATTATTTCA	69	2505	KAG6397885.1	exocyst complex component 8	K19986
303	KAG6425762.1	85.507	69	10	0	1	69	1773	1841	1.67e-15	80.6	KAG6425762.1	88	59	59	0	85.51	1	1	TGCAGAAACATACATAAATATGAACGGGAATCCAGATGAAATTGAGTGGTTCCCTACTCCCGTATTTCA	TGCGGAGACATACATAAGTATGAGTGGGAACGCTGATGAAATTGAGTGGTTCCCTACTCCAGTGTTTCA	69	2331	KAG6425762.1	exocyst complex component 8	K19986
311	KAG6409314.1	82.609	69	12	0	1	69	1315	1383	8.63e-13	71.6	KAG6409314.1	78	57	57	0	82.61	1	1	TGCAGAAACATCATTACTTGGCTGAGGTCCTCTAGGTTGGGCTATTTTGTGCCATTCGACGATAACATC	TGTAGGAACACCATTACTTGGCTGAGGTCCTCTAAAATGGGCCATTTTGTGCCCTTTGATGACAATATC	69	2838	KAG6409314.1	respiratory burst oxidase [EC:1.6.3.- 1.11.1.-]	K13447
311	KAG6388272.1	81.159	69	13	0	1	69	1306	1374	3.67e-11	67.1	KAG6388272.1	73	56	56	0	81.16	1	1	TGCAGAAACATCATTACTTGGCTGAGGTCCTCTAGGTTGGGCTATTTTGTGCCATTCGACGATAACATC	TGTAGGAACACCATTACTTGGTTGAGGTCCTCTAAAATGGGCCATTTTGTGCCCTTTGATGACAATATC	69	2826	KAG6388272.1	respiratory burst oxidase [EC:1.6.3.- 1.11.1.-]	K13447
314	KAG6429049.1	94.03	67	4	0	3	69	1402	1468	1.46e-22	104	KAG6429049.1	114	63	63	0	94.03	1	1	CAGAAACATGCAAAGAGCCCTGAGCTTGCCCGAGAATTTCTCCTAGATGCTGCAACTGTCATTTTTA	CAGAAACATGCGAAGAGCCCTGAGCTTGCTCGGGAATTTCTTCTAGATGCTGCAACTGTCATTTTTA	69	3687	KAG6429049.1	Hypothetical protein	Uncharacterized protein
314	KAG6410993.1	92.308	65	5	0	3	67	847	911	7.56e-20	96	KAG6410993.1	105	60	60	0	92.31	1	1	CAGAAACATGCAAAGAGCCCTGAGCTTGCCCGAGAATTTCTCCTAGATGCTGCAACTGTCATTTT	CAGAAACATGCAAAGAGTCCTGAACTTGCTCGAGAATTTCTCCTAGATGCTGCAATTGTCATCTT	69	3132	KAG6410993.1	Hypothetical protein	Uncharacterized protein
314	KAG6413603.1	92.308	65	5	0	3	67	1423	1487	7.56e-20	96	KAG6413603.1	105	60	60	0	92.31	1	1	CAGAAACATGCAAAGAGCCCTGAGCTTGCCCGAGAATTTCTCCTAGATGCTGCAACTGTCATTTT	CAGAAACATGCAAAGAGTCCTGAACTTGCTCGAGAATTTCTCCTAGATGCTGCAATTGTCATCTT	69	3759	KAG6413603.1	Hypothetical protein	Uncharacterized protein
320	KAG6422229.1	97.059	68	2	0	1	68	720	653	8.08e-26	114	KAG6422229.1	126	66	66	0	97.06	1	-1	TGCAGAAACATTGTGTGTGTGGCCTTCTAGTGTCTGCACGCAGCTCTTTGTCTGGTAATCCCACACCT	TGCAGATACATTGTGTGTGTGGCCTTCTAATGTCTGCACGCAGCTCTTTGTCTGGTAATCCCACACCT	69	2778	KAG6422229.1	coatomer subunit beta'	K17302
320	KAG6425303.1	97.059	68	2	0	1	68	702	635	8.08e-26	114	KAG6425303.1	126	66	66	0	97.06	1	-1	TGCAGAAACATTGTGTGTGTGGCCTTCTAGTGTCTGCACGCAGCTCTTTGTCTGGTAATCCCACACCT	TGCAGATACATTGTGTGTGTGGCCTTCTAATGTCTGCACGCAGCTCTTTGTCTGGTAATCCCACACCT	69	2751	KAG6425303.1	coatomer subunit beta'	K17302
320	KAG6429920.1	95.588	68	3	0	1	68	762	695	3.43e-24	110	KAG6429920.1	121	65	65	0	95.59	1	-1	TGCAGAAACATTGTGTGTGTGGCCTTCTAGTGTCTGCACGCAGCTCTTTGTCTGGTAATCCCACACCT	TGCAGACACATTGTGTGTGTGGCCTTCTAATGTCTGCACACAGCTCTTTGTCTGGTAATCCCACACCT	69	2793	KAG6429920.1	coatomer subunit beta'	K17302
323	KAG6389288.1	89.855	69	7	0	1	69	669	601	2.64e-19	94.2	KAG6389288.1	103	62	62	0	89.86	1	-1	TGCAGAAACCAATCCATTAGCAGACATAACACATAGAGCTCTTGGCCTCTGCTGTGCAAATGCCAGTAT	TGCAGAAACTGATCCGTTAGCAGACATAATGCATAGAGCTCTTGGCCTCTGTTGTGCAAATGCCAGAAT	69	1110	KAG6389288.1	Hypothetical protein	Uncharacterized protein
323	KAG6388304.1	88.406	69	8	0	1	69	645	577	3.22e-18	89.7	KAG6388304.1	98	61	61	0	88.41	1	-1	TGCAGAAACCAATCCATTAGCAGACATAACACATAGAGCTCTTGGCCTCTGCTGTGCAAATGCCAGTAT	TGCAGAAACTGATCCGTTTGCAGACATAATGCATAGAGCTCTTGGCCTCTGTTGTGCAAATGCCAGAAT	69	1089	KAG6388304.1	Hypothetical protein	Uncharacterized protein
323	KAG6391118.1	88.406	69	8	0	1	69	669	601	3.22e-18	89.7	KAG6391118.1	98	61	61	0	88.41	1	-1	TGCAGAAACCAATCCATTAGCAGACATAACACATAGAGCTCTTGGCCTCTGCTGTGCAAATGCCAGTAT	TGCAGAAACTGATCCGTTAGCAGACATAATGCATAGAGCTCTTGGCCTCTGTTGAGCAAATGCCAGAAT	69	1110	KAG6391118.1	Hypothetical protein	Uncharacterized protein
324	KAG6420883.1	86.957	69	9	0	1	69	104	172	1.37e-16	85.1	KAG6420883.1	93	60	60	0	86.96	1	1	TGCAGAAACCAATTGTTCCGGTTGATCTTTACAGAGGGATACGTGATTCCCAGCTAATAGGATTGTCGG	TGCAGAAACCAATTGTTCCTGAGGAACTTTACAGAGGGATACGCGATTCTCAGCTTGTAGGATTGTTGG	69	873	KAG6420883.1	Hypothetical protein	Uncharacterized protein
324	KAG6423903.1	87.692	65	8	0	5	69	90	154	4.77e-16	82.4	KAG6423903.1	90	57	57	0	87.69	1	1	GAAACCAATTGTTCCGGTTGATCTTTACAGAGGGATACGTGATTCCCAGCTAATAGGATTGTCGG	GAAAACAATTGTTCCTGAGGAACTTTACAGAGGGATACGTGATTCTCAGCTTGTAGGATTGTCGG	69	813	KAG6423903.1	Hypothetical protein	Uncharacterized protein
324	KAG6392419.1	87.302	63	8	0	5	67	405	467	5.82e-15	78.8	KAG6392419.1	86	55	55	0	87.3	1	1	GAAACCAATTGTTCCGGTTGATCTTTACAGAGGGATACGTGATTCCCAGCTAATAGGATTGTC	GAAACCCATTGTTCCAGTGGATCTTTACAGAGATATACGCGATACCCAGCTTATAGGATTGTC	69	1191	KAG6392419.1	Hypothetical protein	Uncharacterized protein
325	KAG6397436.1	88.406	69	8	0	1	69	103	35	3.22e-18	89.7	KAG6397436.1	98	61	61	0	88.41	1	-1	TGCAGAAACCACGGCCATCAACACGGACAATAATTATGTTGGGCAGCATGATCTCATCCTCCACCTCAA	TGCAGAAATCACGGGCATGAACACGGACAATGATGGTGTTGGGCAGCATGATTTCATCATCCACCTCAA	69	1638	KAG6397436.1	tRNA(His) guanylyltransferase [EC:2.7.7.79]	K10761
325	KAG6399692.1	88.406	69	8	0	1	69	103	35	3.22e-18	89.7	KAG6399692.1	98	61	61	0	88.41	1	-1	TGCAGAAACCACGGCCATCAACACGGACAATAATTATGTTGGGCAGCATGATCTCATCCTCCACCTCAA	TGCAGAAATCACGGGCATGAACACGGACAATGATGGTGTTGGGCAGCATGATTTCATCATCCACCTCAA	69	1482	KAG6399692.1	tRNA(His) guanylyltransferase [EC:2.7.7.79]	K10761
325	KAG6400231.1	82.609	69	12	0	1	69	103	35	8.63e-13	71.6	KAG6400231.1	78	57	57	0	82.61	1	-1	TGCAGAAACCACGGCCATCAACACGGACAATAATTATGTTGGGCAGCATGATCTCATCCTCCACCTCAA	TGCAGAAATCACGGACACGAACATGGATGATGATGGTGTTGGGCAGCATGATCTTATCCTCCATCTCAA	69	2355	KAG6400231.1	Hypothetical protein	Uncharacterized protein
333	KAG6404492.1	86.765	68	9	0	1	68	1069	1002	4.77e-16	83.3	KAG6404492.1	91	59	59	0	86.76	1	-1	TGCAGAAACCCTCAATCACAATACCATAACTATATAAATTTGCTGCAATTCCGGAATTCTCCATTTCA	TGCAGAAACCCTCAATCAGGATACTATAGCTATATACATTTCCTGCAATTCCAGAACTCTTCATTTCA	69	2190	KAG6404492.1	Hypothetical protein	Uncharacterized protein
333	KAG6402170.1	83.824	68	11	0	1	68	1162	1095	2.47e-13	74.3	KAG6402170.1	81	57	57	0	83.82	1	-1	TGCAGAAACCCTCAATCACAATACCATAACTATATAAATTTGCTGCAATTCCGGAATTCTCCATTTCA	TGCAGAAACCCTCGATCAGGATACTATAGCTATATACATTTCCCGCAATTCCAGAACTCTTCATTTCA	69	2451	KAG6402170.1	Hypothetical protein	Uncharacterized protein
334	KAG6399324.1	86.957	69	9	0	1	69	1611	1679	1.37e-16	85.1	KAG6399324.1	93	60	60	0	86.96	1	1	TGCAGAAACCGACGAAGCCAAGAAAGCTTTGAAAGAAGCTTTGAAATTGACAAATAGAGTGGAATTACA	TGCAGAAACCGAGGATGCTATGAAAGCTTTGAAAGAAGCTTTAAAGATGACAAACAGAGTGGAATTGCA	69	2553	KAG6399324.1	Hypothetical protein	Uncharacterized protein
334	KAG6408797.1	86.957	69	9	0	1	69	1377	1445	1.37e-16	85.1	KAG6408797.1	93	60	60	0	86.96	1	1	TGCAGAAACCGACGAAGCCAAGAAAGCTTTGAAAGAAGCTTTGAAATTGACAAATAGAGTGGAATTACA	TGGAGAAACTGAGGATGCTAAGAAAGCTTTGAAAGAAGCTTTGAAGATGACCAACAGAGTGGAATTACA	69	2409	KAG6408797.1	Hypothetical protein	Uncharacterized protein
334	KAG6406460.1	84.058	69	11	0	1	69	1377	1445	7.08e-14	76.1	KAG6406460.1	83	58	58	0	84.06	1	1	TGCAGAAACCGACGAAGCCAAGAAAGCTTTGAAAGAAGCTTTGAAATTGACAAATAGAGTGGAATTACA	TGGAGAAACTGAGGATGCTAAGAAAGCTTTGAAAGAAGCTTTAAAGATGACCAACAGAGTGGAATTGCA	69	2595	KAG6406460.1	Hypothetical protein	Uncharacterized protein
341	KAG6388234.1	85.507	69	10	0	1	69	702	634	1.67e-15	80.6	KAG6388234.1	88	59	59	0	85.51	1	-1	TGCAGAAACCTGATCACCCTTATCCTCAAGCAGAGAAAGCTCAGCTACCGGAAGCCATCTCTGATGATC	TGAAGAAACCTGATCACCCTTGTCCTCGGGTAAAGAAAGCTCTGCAACTGGAAGCCATCTTTGATGATC	69	987	KAG6388234.1	nucleoporin SEH1	K14299
341	KAG6409346.1	85.507	69	10	0	1	69	702	634	1.67e-15	80.6	KAG6409346.1	88	59	59	0	85.51	1	-1	TGCAGAAACCTGATCACCCTTATCCTCAAGCAGAGAAAGCTCAGCTACCGGAAGCCATCTCTGATGATC	TGAAGAAACCTGATCACCCTTGTCCTCGGGTAAAGAAAGCTCTGCAACTGGAAGCCATCTTTGATGATC	69	987	KAG6409346.1	nucleoporin SEH1	K14299
346	KAG6406715.1	84.058	69	11	0	1	69	542	610	7.08e-14	76.1	KAG6406715.1	83	58	58	0	84.06	1	1	TGCAGAAACGAAGTCCTCCCGAGTCCACCACCTACGATTGTGTCATTCAAGGTTTCTGTAATAGCCAGA	TGCAGAAAGGAAGCCATCCGGAGGCCACCAGCTACGACTGCCTCATTCAAGGTTTCTGCAATGGCCAGA	69	1569	KAG6406715.1	Hypothetical protein	Uncharacterized protein
346	KAG6409031.1	83.582	67	11	0	1	67	2678	2744	8.63e-13	72.5	KAG6409031.1	79	56	56	0	83.58	1	1	TGCAGAAACGAAGTCCTCCCGAGTCCACCACCTACGATTGTGTCATTCAAGGTTTCTGTAATAGCCA	TGCAGAAAGGAAGCCATCCGGAGGCCACCAGCTACGACTGCCTCATTCAAGGTTTCTGCAATGGCCA	69	3837	KAG6409031.1	Hypothetical protein	Uncharacterized protein
350	KAG6427105.1	89.855	69	7	0	1	69	293	225	2.64e-19	94.2	KAG6427105.1	103	62	62	0	89.86	1	-1	TGCAGAAACGCAATCAAAGGAGCAGCTCCATCTTCCAAAGACTTCAACCTGCCCACCACCTCAACTCTC	TGCAGAAAGCCAATCAAAGGAGCAGCCCCATCCTCCAAAGCCTTCAGCCTGCCCACCACCTCAGCTCTC	69	1317	KAG6427105.1	translation initiation factor 3 subunit E	K03250
350	KAG6430117.1	88.406	69	8	0	1	69	293	225	3.22e-18	89.7	KAG6430117.1	98	61	61	0	88.41	1	-1	TGCAGAAACGCAATCAAAGGAGCAGCTCCATCTTCCAAAGACTTCAACCTGCCCACCACCTCAACTCTC	TGCAGGAAGCCAATCAAAGGAGCAGCCCCATCCTCCAAAGCCTTCAGCCTGCCCACCACCTCAGCTCTC	69	1317	KAG6430117.1	translation initiation factor 3 subunit E	K03250
350	KAG6383782.1	84.058	69	11	0	1	69	293	225	7.08e-14	76.1	KAG6383782.1	83	58	58	0	84.06	1	-1	TGCAGAAACGCAATCAAAGGAGCAGCTCCATCTTCCAAAGACTTCAACCTGCCCACCACCTCAACTCTC	TGCAGAAATCCAATCAAAGGAGCAGCCCCATCTTCCAACACCTTCAGCCTACCGACCACCTCGGCTCTC	69	1203	KAG6383782.1	translation initiation factor 3 subunit E	K03250
351	KAG6411238.1	94.915	59	3	0	1	59	4416	4358	2.64e-19	94.2	KAG6411238.1	103	56	56	0	94.92	1	-1	TGCAGAAACGCTGTGAGTGCCATATTTGTCATCCCAGTACATGGTGCTAATCCTGTATA	TGCAGAAACACTATGAGTGCCATATTTATCATCCCAGTACATGGTGCTAATCCTGTATA	69	4629	KAG6411238.1	myosin V	K10357
351	KAG6413856.1	94.915	59	3	0	1	59	4725	4667	2.64e-19	94.2	KAG6413856.1	103	56	56	0	94.92	1	-1	TGCAGAAACGCTGTGAGTGCCATATTTGTCATCCCAGTACATGGTGCTAATCCTGTATA	TGCAGAAACACTATGAGTGCCATATTTATCATCCCAGTACATGGTGCTAATCCTGTATA	69	4926	KAG6413856.1	myosin V	K10357
351	KAG6428580.1	86.364	66	9	0	4	69	4359	4294	5.82e-15	79.7	KAG6428580.1	87	57	57	0	86.36	1	-1	AGAAACGCTGTGAGTGCCATATTTGTCATCCCAGTACATGGTGCTAATCCTGTATAATTGCTGGAT	AGCAACGCTATGGGTGCCATATTTGTCGTCCCAATACATTGTGCTAATCCTGTATATTTGTTGAAT	69	6789	KAG6428580.1	myosin V	K10357
353	KAG6394095.1	85.075	67	10	0	1	67	1286	1352	2.03e-14	77	KAG6394095.1	84	57	57	0	85.07	1	1	TGCAGAAACGGCTGGATAGATTCATTTGCAAGATGAAGGACTTCAAGGTAAGTAGTGTGGAGATGAT	TGCAGAAACGACTGGATAGATTCATCTGCAAGCTGAAGGACTTGAAGATATGGAATATTGAGATGAT	69	1482	KAG6394095.1	tyrosyl-DNA phosphodiesterase 2 [EC:3.1.4.-]	K19619
353	KAG6392344.1	83.582	67	11	0	1	67	1157	1223	8.63e-13	72.5	KAG6392344.1	79	56	56	0	83.58	1	1	TGCAGAAACGGCTGGATAGATTCATTTGCAAGATGAAGGACTTCAAGGTAAGTAGTGTGGAGATGAT	TGCATAAACGACTGGATAGATTCATCTGCAAGCTAAAGGACTTGAAGATAAGGAATATTGAGATGAT	69	1353	KAG6392344.1	tyrosyl-DNA phosphodiesterase 2 [EC:3.1.4.-]	K19619
356	KAG6413772.1	90.476	63	6	0	5	67	480	542	1.12e-17	87.8	KAG6413772.1	96	57	57	0	90.48	1	1	GAAACGTTTTCAAAATGACGATCGTGTGTATAAATCTTTCCTGGACATTCTGAATATGTATCG	GAGACGTTTTCAAAATGATGATCATGTGTATAAATCTTTCTTGGACATTTTGAATATGTACCG	69	4083	KAG6413772.1	paired amphipathic helix protein Sin3a	K11644
356	KAG6398271.1	89.062	64	7	0	4	67	251	314	1.37e-16	85.1	KAG6398271.1	93	57	57	0	89.06	1	1	AGAAACGTTTTCAAAATGACGATCGTGTGTATAAATCTTTCCTGGACATTCTGAATATGTATCG	AGAAACGTTTTCAAAATGATGATCATGTTTATAAATCTTTCCTAGACATCTTGAATATGTACCG	69	4827	KAG6398271.1	paired amphipathic helix protein Sin3a	K11644
356	KAG6395998.1	87.879	66	8	0	4	69	251	316	1.37e-16	84.2	KAG6395998.1	92	58	58	0	87.88	1	1	AGAAACGTTTTCAAAATGACGATCGTGTGTATAAATCTTTCCTGGACATTCTGAATATGTATCGAA	AGAAACGGTTTCAAAATGATGATCATGTTTATAAATCTTTCCTCGACATCTTGAATATGTACCGAA	69	3933	KAG6395998.1	paired amphipathic helix protein Sin3a	K11644
358	KAG6393610.1	88.889	63	7	0	7	69	225	287	4.77e-16	83.3	KAG6393610.1	91	56	56	0	88.89	1	1	AACTAAGAGGACATCAATTTTTGATGATCGGAGCAAGGAGAATGAAGAACTAACAGCCTTGAT	AACCAAAAGGTCGTCTATTTTTGATGATCGGAGCAAGGAAAATGAAGAATTAACAGCCTTGAT	69	921	KAG6393610.1	syntaxin 5	K08490
361	KAG6384018.1	88.406	69	8	0	1	69	627	559	3.22e-18	89.7	KAG6384018.1	98	61	61	0	88.41	1	-1	TGCAGAAACTAGTGAGGGAACAAGCAACTTATCACCAGGGCCAAAAATGCTGCTAGGTCGAATACAGCA	TGCAGAGACTAATGATGGAACAAACAACCTATCACCAGGGCCAAAAATACTGCTAGGTCGAATGGAGCA	69	1218	KAG6384018.1	plant 3beta-hydroxysteroid-4alpha-carboxylate 3-dehydrogenase [EC:1.1.1.418]	K23558
361	KAG6389539.1	88.406	69	8	0	1	69	627	559	3.22e-18	89.7	KAG6389539.1	98	61	61	0	88.41	1	-1	TGCAGAAACTAGTGAGGGAACAAGCAACTTATCACCAGGGCCAAAAATGCTGCTAGGTCGAATACAGCA	TGCAGAGACTAATGATGGAACAAACAACCTATCACCAGGGCCAAAAATACTGCTAGGTCGAATGGAGCA	69	1578	KAG6389539.1	plant 3beta-hydroxysteroid-4alpha-carboxylate 3-dehydrogenase [EC:1.1.1.418]	K23558
361	KAG6391302.1	88.406	69	8	0	1	69	627	559	3.22e-18	89.7	KAG6391302.1	98	61	61	0	88.41	1	-1	TGCAGAAACTAGTGAGGGAACAAGCAACTTATCACCAGGGCCAAAAATGCTGCTAGGTCGAATACAGCA	TGCAGAAACTAATGATGGAACAAACAACCTATCACCAGGGCCAAATATACTACTAGGTCGAATGCAGCA	69	1608	KAG6391302.1	plant 3beta-hydroxysteroid-4alpha-carboxylate 3-dehydrogenase [EC:1.1.1.418]	K23558
365	KAG6429850.1	81.159	69	13	0	1	69	359	427	3.67e-11	67.1	KAG6429850.1	73	56	56	0	81.16	1	1	TGCAGAAACTCACCGCCCAAGAAATCATGGATGCTAAAGCATTAGCCGCCTCCAAGAGCCACAGTGAAG	TGCAGAAGATGACGGCGCAGGAAATCATGGATGCGAAAGCCCTCGCTGCATCCAAGAGCCACAGCGAAG	69	948	KAG6429850.1	Hypothetical protein	Uncharacterized protein
366	KAG6386099.1	86.885	61	8	0	1	61	356	296	7.08e-14	75.2	KAG6386099.1	82	53	53	0	86.89	1	-1	TGCAGAAACTCCAAGTTGTCCAGTGGCCTCCCCTTCACAAGCTTGCTCACCTCTATATGCT	TGCAGGCACTCCAAGTTGTCCAGCGGCCTCCCCTTGACAAGTTTGTTGACCTCGATATGCT	69	858	KAG6386099.1	microtubule-associated protein, RP/EB family	K10436
366	KAG6412270.1	86.885	61	8	0	1	61	470	410	7.08e-14	75.2	KAG6412270.1	82	53	53	0	86.89	1	-1	TGCAGAAACTCCAAGTTGTCCAGTGGCCTCCCCTTCACAAGCTTGCTCACCTCTATATGCT	TGCAGGAACTCCAAGTTGTCCAGCGGCCTCCCTTTGACAAGTTTGTTGACCTCGATATGCT	69	972	KAG6412270.1	microtubule-associated protein, RP/EB family	K10436
367	KAG6386099.1	86.885	61	8	0	1	61	356	296	7.08e-14	75.2	KAG6386099.1	82	53	53	0	86.89	1	-1	TGCAGAAACTCCAAGTTGTCCAGTGGCCTCCCCTTCACAAGCTTGCTCACCTCTATATGCT	TGCAGGCACTCCAAGTTGTCCAGCGGCCTCCCCTTGACAAGTTTGTTGACCTCGATATGCT	69	858	KAG6386099.1	microtubule-associated protein, RP/EB family	K10436
367	KAG6412270.1	86.885	61	8	0	1	61	470	410	7.08e-14	75.2	KAG6412270.1	82	53	53	0	86.89	1	-1	TGCAGAAACTCCAAGTTGTCCAGTGGCCTCCCCTTCACAAGCTTGCTCACCTCTATATGCT	TGCAGGAACTCCAAGTTGTCCAGCGGCCTCCCTTTGACAAGTTTGTTGACCTCGATATGCT	69	972	KAG6412270.1	microtubule-associated protein, RP/EB family	K10436
369	KAG6399085.1	88.406	69	8	0	1	69	3662	3594	3.22e-18	89.7	KAG6399085.1	98	61	61	0	88.41	1	-1	TGCAGAAACTCCATATTGATTTTCAAAGTGTCCGGGCAAGAACTCAACCATGTATCCTTTTCATGAGCA	TGCAGAAATTCCATGTTGATTTTTAAGGTATCTGGGCATGAACTCAGCCATGTATCCTTTTCATGAGCA	69	5979	KAG6399085.1	THO complex subunit 2	K12879
371	KAG6418120.1	95.652	69	3	0	1	69	1116	1048	9.84e-25	112	KAG6418120.1	123	66	66	0	95.65	1	-1	TGCAGAAACTCTTTCTGCAACAGCCATTGCTGATATTCTTCGGGGCTGTGTACAGATTATGTTACAGAA	TGCAGAAACTCTTTCTGCAACAGTCATTGCGGATATTCTTCGGGGCTGTGTACAGATTATGTTACAAAA	69	1170	KAG6418120.1	Hypothetical protein	Uncharacterized protein
371	KAG6415604.1	94.203	69	4	0	1	69	1152	1084	1.2e-23	107	KAG6415604.1	118	65	65	0	94.2	1	-1	TGCAGAAACTCTTTCTGCAACAGCCATTGCTGATATTCTTCGGGGCTGTGTACAGATTATGTTACAGAA	TGCAGAAACTCTTTCTGCAACAGTAATTGCAGATATTCTTCGGGGCTGTGTACAGATTATGTTACAAAA	69	3636	KAG6415604.1	ATP-dependent RNA helicase DHX36 [EC:3.6.4.13]	K14442
371	KAG6390122.1	94.118	68	4	0	2	69	389	322	4.18e-23	105	KAG6390122.1	116	64	64	0	94.12	1	-1	GCAGAAACTCTTTCTGCAACAGCCATTGCTGATATTCTTCGGGGCTGTGTACAGATTATGTTACAGAA	GCAGAAACTCTTTCTGCGACAGTCATTGCTGATATTCTTCGGGGCTGCGTACAGATTATGTTACAAAA	69	444	KAG6390122.1	Hypothetical protein	Uncharacterized protein
372	KAG6387075.1	89.855	69	7	0	1	69	642	710	2.64e-19	94.2	KAG6387075.1	103	62	62	0	89.86	1	1	TGCAGAAACTCTTTGTACCATGACTCGATGGGCTCCCCCAAGTTTAGCTTCAAAAATATCCAGCTCAAG	TGCAGAAACTCTTTGCACCATTACTCGATGGGCTCCCCCGAGATTAGCTGCAAAAATCTCCAGCCCAAG	69	2118	KAG6387075.1	serine/threonine-protein phosphatase 6 regulatory subunit 3	K15501
372	KAG6385242.1	86.957	69	9	0	1	69	639	707	1.37e-16	85.1	KAG6385242.1	93	60	60	0	86.96	1	1	TGCAGAAACTCTTTGTACCATGACTCGATGGGCTCCCCCAAGTTTAGCTTCAAAAATATCCAGCTCAAG	TGCAGGAACTCTTTGCACCATTACTCGATGGGCTCCCCCGACATTAGCTGCAAAAATCTCCAGCCCAAG	69	2106	KAG6385242.1	serine/threonine-protein phosphatase 6 regulatory subunit 3	K15501
384	KAG6428667.1	94.915	59	3	0	2	60	1628	1570	2.64e-19	94.2	KAG6428667.1	103	56	56	0	94.92	1	-1	GCAGAAACTTCATTATCTTGTGCGACAGAAGAGCTTTCTGTTTCTTCACTTTTCTCTTC	GCAGTAACTTCATTATCTTGTGTGACAGAAGAGCTGTCTGTTTCTTCACTTTTCTCTTC	69	3195	KAG6428667.1	elongation factor Ts	K02357
384	KAG6428667.1	84.375	64	10	0	1	64	1251	1188	8.63e-13	71.6	KAG6428667.1	78	54	54	0	84.38	1	-1	TGCAGAAACTTCATTATCTTGTGCGACAGAAGAGCTTTCTGTTTCTTCACTTTTCTCTTCATCT	TGCTGTAACTTCATTATCTTCTGTGGTGGAGGAGCTGTCTGTTTCTTCACTTTTCTCTTCAACT	69	3195	KAG6428667.1	elongation factor Ts	K02357
384	KAG6428663.1	94.915	59	3	0	2	60	1541	1483	2.64e-19	94.2	KAG6428663.1	103	56	56	0	94.92	1	-1	GCAGAAACTTCATTATCTTGTGCGACAGAAGAGCTTTCTGTTTCTTCACTTTTCTCTTC	GCAGTAACTTCATTATCTTGTGTGACAGAAGAGCTGTCTGTTTCTTCACTTTTCTCTTC	69	3159	KAG6428663.1	elongation factor Ts	K02357
384	KAG6431756.1	93.22	59	4	0	2	60	1619	1561	3.22e-18	89.7	KAG6431756.1	98	55	55	0	93.22	1	-1	GCAGAAACTTCATTATCTTGTGCGACAGAAGAGCTTTCTGTTTCTTCACTTTTCTCTTC	GCAGTAACTTCATTATCTTGTGTGACAGAAGAGCTGTCTGTTTCTTCACTTTTTTCTTC	69	3192	KAG6431756.1	elongation factor Ts	K02357
384	KAG6431756.1	86.667	60	8	0	1	60	1251	1192	2.47e-13	73.4	KAG6431756.1	80	52	52	0	86.67	1	-1	TGCAGAAACTTCATTATCTTGTGCGACAGAAGAGCTTTCTGTTTCTTCACTTTTCTCTTC	TGCAGTAACTTCATTATCGTCTGTGGCGGAGGAGCTGTCTGTTTCTTCACTTTTCTCTTC	69	3192	KAG6431756.1	elongation factor Ts	K02357
386	KAG6420797.1	88.679	53	6	0	6	58	586	638	3.01e-12	69.8	KAG6420797.1	76	47	47	0	88.68	1	1	AAACTTGAGTGGGAACACTTGTCTGTTGACCTCCTGCCTCATCCAGATATGTT	AAACTTCAGTGGGAGCAGTTGTCTATTGACATCCTTCCTCATCCAGATATGTT	69	3654	KAG6420797.1	Hypothetical protein	Uncharacterized protein
399	KAG6420306.1	92.424	66	5	0	4	69	379	444	2.17e-20	97.8	KAG6420306.1	107	61	61	0	92.42	1	1	AGAAAGAAGAAGGCAGTACACAAGACGACTGCATCAGATGACAAAAGGCTTCAAAGTACCTTACAG	AGAAAGAAGAAGGCTGTACACAAGACGACGACAACAGATGACAAAAGGCTTCAAAGTACCTTAAAG	69	1503	KAG6420306.1	Hypothetical protein	Uncharacterized protein
399	KAG6423340.1	92.424	66	5	0	4	69	205	270	2.17e-20	97.8	KAG6423340.1	107	61	61	0	92.42	1	1	AGAAAGAAGAAGGCAGTACACAAGACGACTGCATCAGATGACAAAAGGCTTCAAAGTACCTTACAG	AGAAAGAAGAAGGCTGTACACAAGACGACCACAACAGATGACAAAAGGCTTCAAAGTACCTTAAAG	69	621	KAG6423340.1	nascent polypeptide-associated complex subunit beta	K01527
399	KAG6420310.1	89.855	69	7	0	1	69	145	213	2.64e-19	94.2	KAG6420310.1	103	62	62	0	89.86	1	1	TGCAGAAAGAAGAAGGCAGTACACAAGACGACTGCATCAGATGACAAAAGGCTTCAAAGTACCTTACAG	TGCAGAAAGAAGAAGGCTGTACACAAGACGACCACGACAGATGACAAAAGGCTTCAAACTACCTTAAAG	69	579	KAG6420310.1	nascent polypeptide-associated complex subunit beta	K01527
400	KAG6423340.1	96.97	66	2	0	4	69	205	270	9.84e-25	111	KAG6423340.1	122	64	64	0	96.97	1	1	AGAAAGAAGAAGGCTGTACACAAGACGACCACAACAGATGACAAAAGGCTTCAGAGTACCTTACAG	AGAAAGAAGAAGGCTGTACACAAGACGACCACAACAGATGACAAAAGGCTTCAAAGTACCTTAAAG	69	621	KAG6423340.1	nascent polypeptide-associated complex subunit beta	K01527
400	KAG6420310.1	94.203	69	4	0	1	69	145	213	1.2e-23	107	KAG6420310.1	118	65	65	0	94.2	1	1	TGCAGAAAGAAGAAGGCTGTACACAAGACGACCACAACAGATGACAAAAGGCTTCAGAGTACCTTACAG	TGCAGAAAGAAGAAGGCTGTACACAAGACGACCACGACAGATGACAAAAGGCTTCAAACTACCTTAAAG	69	579	KAG6420310.1	nascent polypeptide-associated complex subunit beta	K01527
400	KAG6395238.1	95.455	66	3	0	4	69	67	132	4.18e-23	106	KAG6395238.1	117	63	63	0	95.45	1	1	AGAAAGAAGAAGGCTGTACACAAGACGACCACAACAGATGACAAAAGGCTTCAGAGTACCTTACAG	AGAAAGAAGAAGGCTGTACACAAGACGACCACAACAGATGACAAGAGGCTTCAAAGTACCTTAAAG	69	486	KAG6395238.1	nascent polypeptide-associated complex subunit beta	K01527
409	KAG6434713.1	86.441	59	8	0	3	61	833	891	8.63e-13	71.6	KAG6434713.1	78	51	51	0	86.44	1	1	CAGAAAGAATGTCATACAAATCACATTGCCAAGTTTTTCATCTCAAGCCGTATAATTGA	CAGAAAGAATGTCACACATCCCACTTTGCCAAATTTTTCATCTCAAGCCATATAACTGA	69	891	KAG6434713.1	putative pectin methylesterase [EC:2.1.1.-]	K23871
409	KAG6438069.1	86.441	59	8	0	3	61	719	777	8.63e-13	71.6	KAG6438069.1	78	51	51	0	86.44	1	1	CAGAAAGAATGTCATACAAATCACATTGCCAAGTTTTTCATCTCAAGCCGTATAATTGA	CAGAAAGAATGTCACACATCCCACTTTGCCAAATTTTTCATCTCAAGCCATATAACTGA	69	777	KAG6438069.1	putative pectin methylesterase [EC:2.1.1.-]	K23871
416	KAG6433899.1	88.235	68	8	0	1	68	803	736	1.12e-17	87.8	KAG6433899.1	96	60	60	0	88.24	1	-1	TGCAGAAAGACCATACTCTCCTTCCCATTCAAATGCATTCCGTCCATGTCCTCCATTTCCAAGCTTAC	TGCAAAAAGACCAAACTGTCCTTCCCATTCAAATGCGTTCCATCCATGTCCTCCATCTCCAAACTCAC	69	996	KAG6433899.1	Hypothetical protein	Uncharacterized protein
416	KAG6437216.1	88.235	68	8	0	1	68	803	736	1.12e-17	87.8	KAG6437216.1	96	60	60	0	88.24	1	-1	TGCAGAAAGACCATACTCTCCTTCCCATTCAAATGCATTCCGTCCATGTCCTCCATTTCCAAGCTTAC	TGCAAAAAGACCAAACTGTCCTTCCCATTCAAATGCGTTCCATCCATGTCCTCCATCTCCAAACTCAC	69	996	KAG6437216.1	Hypothetical protein	Uncharacterized protein
416	KAG6401598.1	82.609	69	12	0	1	69	770	702	8.63e-13	71.6	KAG6401598.1	78	57	57	0	82.61	1	-1	TGCAGAAAGACCATACTCTCCTTCCCATTCAAATGCATTCCGTCCATGTCCTCCATTTCCAAGCTTACT	TGCAAAATGACCAAACTCTCCTCCCCATTCAAATGCCTCCCATCCATATCCTCCATCTCCATCCTCACT	69	1314	KAG6401598.1	Hypothetical protein	Uncharacterized protein
427	KAG6388940.1	85.075	67	10	0	1	67	400	334	2.03e-14	77	KAG6388940.1	84	57	57	0	85.07	1	-1	TGCAGAAAGAGGGAGTGAAAGGATGGTCCGGAGAGTGGATATACATGAACATGAACTTATGCTCATC	TGCAGAAGTTGGGAGTGAATGGATGGTCTGGTGAGTGGATGTACATGAACATCAACTTGTGCTCTTC	69	1101	KAG6388940.1	FAS-associated factor 2	K18726
427	KAG6390880.1	85.075	67	10	0	1	67	400	334	2.03e-14	77	KAG6390880.1	84	57	57	0	85.07	1	-1	TGCAGAAAGAGGGAGTGAAAGGATGGTCCGGAGAGTGGATATACATGAACATGAACTTATGCTCATC	TGCAGAAGTTGGGAGTGAATGGATGGTCTGGTGAGTGGATGTACATGAACATCAACTTGTGCTCTTC	69	1101	KAG6390880.1	FAS-associated factor 2	K18726
431	KAG6432474.1	90.625	64	6	0	3	66	265	328	3.22e-18	89.7	KAG6432474.1	98	58	58	0	90.62	1	1	CAGAAAGAGTTGGAAGAAGAACAAAATCTAGAAAGAAAGCTCAGAGAGGAACTTAGATAAGTAT	CAGAAAGAGTTGGAAGAGGAACAAAATCTAGAACGCCAGCTCAGAGAGGAGCTTAGATATGTAT	69	687	KAG6432474.1	Hypothetical protein	Uncharacterized protein
431	KAG6435786.1	91.525	59	5	0	3	61	265	323	1.37e-16	85.1	KAG6435786.1	93	54	54	0	91.53	1	1	CAGAAAGAGTTGGAAGAAGAACAAAATCTAGAAAGAAAGCTCAGAGAGGAACTTAGATA	CAGAAAGAGTTGGAAGAGGAACAAAATCTAGAACGCCAGCTCAGAGAGGAGCTTAGATA	69	579	KAG6435786.1	Hypothetical protein	Uncharacterized protein
436	KAG6392783.1	89.552	67	7	0	3	69	745	811	3.22e-18	90.6	KAG6392783.1	99	60	60	0	89.55	1	1	CAGAAAGATGATGGTGATGAAGAATTATGCAGTGTGTTTGTCCCAACAAACCACTTGTATATTGGTG	CAGAGAGATGATGGAGACGAAGAATTATGCAGTGTTTTTGTCCCTACAAACCACTTGTACATCGGTG	69	984	KAG6392783.1	Hypothetical protein	Uncharacterized protein
436	KAG6394552.1	89.552	67	7	0	3	69	553	619	3.22e-18	90.6	KAG6394552.1	99	60	60	0	89.55	1	1	CAGAAAGATGATGGTGATGAAGAATTATGCAGTGTGTTTGTCCCAACAAACCACTTGTATATTGGTG	CAGAGAGATGATGGAGACGAAGAATTATGCAGTGTTTTTGTCCCTACAAACCACTTGTACATCGGTG	69	792	KAG6394552.1	Hypothetical protein	Uncharacterized protein
436	KAG6399678.1	88.06	67	8	0	3	69	517	583	3.92e-17	86	KAG6399678.1	94	59	59	0	88.06	1	1	CAGAAAGATGATGGTGATGAAGAATTATGCAGTGTGTTTGTCCCAACAAACCACTTGTATATTGGTG	CAGAGAGATGACGGAGATGAAGAACTATGCAGTGTTTTTGTCCCTACCAACCACTTGTACATTGGTG	69	858	KAG6399678.1	Hypothetical protein	Uncharacterized protein
442	KAG6429108.1	91.667	48	4	0	1	48	2085	2132	3.01e-12	69.8	KAG6429108.1	76	44	44	0	91.67	1	1	TGCAGAAAGATTCAACTTGCATAACCAGCAATCGAAGCTCAAATACCA	TGCAGATAGATTCAACTTGCATAGCCAGCAATCGAAGCTAAAATATCA	69	2556	KAG6429108.1	Hypothetical protein	Uncharacterized protein
442	KAG6429104.1	91.667	48	4	0	1	48	2424	2471	3.01e-12	69.8	KAG6429104.1	76	44	44	0	91.67	1	1	TGCAGAAAGATTCAACTTGCATAACCAGCAATCGAAGCTCAAATACCA	TGCAGACAGATTCAACTTGCATAGCCAGCAATCGAAGCTAAAATATCA	69	3891	KAG6429104.1	structural maintenance of chromosome 1	K06636
457	KAG6427129.1	92.308	65	5	0	5	69	492	556	7.56e-20	96	KAG6427129.1	105	60	60	0	92.31	1	1	GAAAGCATTGAAAGATTTAGAAGTTGCACGACTAAGCAGTACAATGTTTGAGGAAAAAGCTCAGA	GAAGGCACTGAAAGATTTAGAAGTTGCACGATTAAGCAGTTCAATGTTTGAGGAGAAAGCTCAGA	69	3684	KAG6427129.1	Hypothetical protein	Uncharacterized protein
457	KAG6430141.1	92.308	65	5	0	5	69	492	556	7.56e-20	96	KAG6430141.1	105	60	60	0	92.31	1	1	GAAAGCATTGAAAGATTTAGAAGTTGCACGACTAAGCAGTACAATGTTTGAGGAAAAAGCTCAGA	GAAGGCACTGAAAGATTTAGACGTTGCACGATTAAGCAGTACAATGTTTGAGGAGAAAGCTCAGA	69	3594	KAG6430141.1	Hypothetical protein	Uncharacterized protein
457	KAG6434429.1	81.159	69	13	0	1	69	479	547	3.67e-11	67.1	KAG6434429.1	73	56	56	0	81.16	1	1	TGCAGAAAGCATTGAAAGATTTAGAAGTTGCACGACTAAGCAGTACAATGTTTGAGGAAAAAGCTCAGA	TGCAAAAAGCACTGAAAGATTTGGAAATTGCGCGACATAACAGTATAGTATATGAGGAAAAAGCCCAGA	69	3612	KAG6434429.1	Hypothetical protein	Uncharacterized protein
459	KAG6425535.1	89.552	67	7	0	1	67	463	397	3.22e-18	90.6	KAG6425535.1	99	60	60	0	89.55	1	-1	TGCAGAAAGCCACACGAGCAGTGGACAGATACAGAGTTCCAGCCACAGGGCCAGTTGTTGTGGAAAG	TGCAGAAAGCCACACGGGCAGTGGACAGATAAAGGGTCCCAGCAACAGGGCCAGTGGTGGTGGAAAG	69	729	KAG6425535.1	Hypothetical protein	Uncharacterized protein
459	KAG6425538.1	89.552	67	7	0	1	67	463	397	3.22e-18	90.6	KAG6425538.1	99	60	60	0	89.55	1	-1	TGCAGAAAGCCACACGAGCAGTGGACAGATACAGAGTTCCAGCCACAGGGCCAGTTGTTGTGGAAAG	TGCAGAAAGCCACACGGGCAGTGGACAGATAAAGGGTCCCAGCAACAGGGCCAGTGGTGGTGGAAAG	69	729	KAG6425538.1	Hypothetical protein	Uncharacterized protein
459	KAG6422448.1	86.567	67	9	0	1	67	226	160	1.67e-15	81.5	KAG6422448.1	89	58	58	0	86.57	1	-1	TGCAGAAAGCCACACGAGCAGTGGACAGATACAGAGTTCCAGCCACAGGGCCAGTTGTTGTGGAAAG	TGCAGAAAGCCACGCGGGCAGTGGAAAGGTAGAGGGTCCCAGCAACAGGGCCAGTGGTTGTGGAAAG	69	432	KAG6422448.1	Hypothetical protein	Uncharacterized protein
460	KAG6388886.1	86.957	69	9	0	1	69	980	912	1.37e-16	85.1	KAG6388886.1	93	60	60	0	86.96	1	-1	TGCAGAAAGCCACCCACTTTGTTCAAAGTGACAAATGATACTGTGTTCTCATCATTGTATTTGTAGTCA	TGCAGAAAACCTCCCACTTTGTTCATGGTGACGAAAGATACCATGTTTTCATCATTGTATTTGTAGTCA	69	1245	KAG6388886.1	elongation factor 1-gamma	K03233
460	KAG6390239.1	86.957	69	9	0	1	69	983	915	1.37e-16	85.1	KAG6390239.1	93	60	60	0	86.96	1	-1	TGCAGAAAGCCACCCACTTTGTTCAAAGTGACAAATGATACTGTGTTCTCATCATTGTATTTGTAGTCA	TGAAGAAAACCTCCCACTTTGTTCATGGTGACAAACGATACCATGTTTTCATCATTGTATTTGTAGTCA	69	1248	KAG6390239.1	elongation factor 1-gamma	K03233
460	KAG6425195.1	85.507	69	10	0	1	69	980	912	1.67e-15	80.6	KAG6425195.1	88	59	59	0	85.51	1	-1	TGCAGAAAGCCACCCACTTTGTTCAAAGTGACAAATGATACTGTGTTCTCATCATTGTATTTGTAGTCA	TGCAGAAAACCACCGACCTTGTTCATGGTAACAAAAGAGACAGTGTTCTCATCATTGTATTTGTAATCA	69	1245	KAG6425195.1	elongation factor 1-gamma	K03233
469	KAG6438426.1	82.812	64	11	0	1	64	673	610	3.67e-11	67.1	KAG6438426.1	73	53	53	0	82.81	1	-1	TGCAGAAAGCGATGTGGACGTTGGAGAGGTAGAGGGTGCCGGAGACTGGGCCGGTGGAAGTTGA	TGCAAAATGCGACGTGGATGTCGGAGAGATAGAGGGTTCCGGCGACCGGACCGGTGGAAGTGGA	69	996	KAG6438426.1	Hypothetical protein	Uncharacterized protein
472	KAG6396375.1	92.188	64	5	0	1	64	1328	1391	2.64e-19	94.2	KAG6396375.1	103	59	59	0	92.19	1	1	TGCAGAAAGCTAGAGGGAGGGGTAAAAGTAGAAAAGCTGGAGGCTTGACAACTATCCAGCTACC	TGCAGAAAGCTAGAGGGAGGGGTAAAAGTAGAAAAGCTGGGGGGTTGACAACAATTCAGCTTCC	69	4650	KAG6396375.1	ATP-dependent RNA helicase DHX29 [EC:3.6.4.13]	K18995
472	KAG6398660.1	92.188	64	5	0	1	64	1409	1472	2.64e-19	94.2	KAG6398660.1	103	59	59	0	92.19	1	1	TGCAGAAAGCTAGAGGGAGGGGTAAAAGTAGAAAAGCTGGAGGCTTGACAACTATCCAGCTACC	TGCAGAAAGCTAGAGGGAGGGGTAAAAGTAGAAAAGTTGGAGGGTTGACAACAATTCAGCTTCC	69	4587	KAG6398660.1	ATP-dependent RNA helicase DHX29 [EC:3.6.4.13]	K18995
473	KAG6420156.1	85.294	68	10	0	1	68	1763	1830	5.82e-15	78.8	KAG6420156.1	86	58	58	0	85.29	1	1	TGCAGAAAGCTAGTTTGCTTCTTGCAGAGAAGGAGAAACAGATTCAACAGTTTCAGTTTGAGCTTGAA	TGCAGAAAGCAAATGAGCTCCTTGCTGAGAATGAGAAACAGATTCAACGTCTTCAGTTTGAGCTTGAA	69	2451	KAG6420156.1	Hypothetical protein	Uncharacterized protein
474	KAG6406628.1	81.69	71	10	1	2	69	983	913	1.05e-11	68.9	KAG6406628.1	75	58	58	3	81.69	1	-1	GCAGAAAGCTCACTTCTGAGTAGC---TGGTGAAGTCTGAGGACACATTCTTTCAGCTCATGCGGTTTATA	GCAGATTGCTCGCTTCTGAGTAGCAAATGGTGAAGTCTCAGGACACACTCTTTCAGTTCACATGCTTTATA	69	1086	KAG6406628.1	cyclin-A	K06627
481	KAG6427931.1	91.525	59	5	0	3	61	1678	1736	1.37e-16	85.1	KAG6427931.1	93	54	54	0	91.53	1	1	CAGAAAGCTTTGTTTGATGAAGGTTGTATCTATGTTGGTGTACCTCCTCTATATAAGGT	CAGAGAGCTTTGTTTGATGAAGGTTGCATCTACGTCGGTGTTCCTCCTCTATATAAGGT	69	2040	KAG6427931.1	DNA gyrase subunit B [EC:5.6.2.2]	K02470
481	KAG6430974.1	91.525	59	5	0	3	61	1678	1736	1.37e-16	85.1	KAG6430974.1	93	54	54	0	91.53	1	1	CAGAAAGCTTTGTTTGATGAAGGTTGTATCTATGTTGGTGTACCTCCTCTATATAAGGT	CAGAGAGCTTTGTTTGATGAAGGTTGCATCTACGTCGGTGTTCCTCCTCTATATAAGGT	69	2040	KAG6430974.1	DNA gyrase subunit B [EC:5.6.2.2]	K02470
487	KAG6432336.1	84.058	69	11	0	1	69	1320	1252	7.08e-14	76.1	KAG6432336.1	83	58	58	0	84.06	1	-1	TGCAGAAAGGACCACCGTGAAAACCCACTCTCCAGCCAGTAGCACTCCTCCAGCAAAAACTCCAATACC	TGCGGAAAGGGCCACTGTGAAAACCCACTCTCCAGCTAATACTACTCCACCAACTAAAACTCCAATGCC	69	2112	KAG6432336.1	phosphatidate cytidylyltransferase [EC:2.7.7.41]	K00981
487	KAG6431038.1	82.353	68	12	0	2	69	461	394	3.01e-12	69.8	KAG6431038.1	76	56	56	0	82.35	1	-1	GCAGAAAGGACCACCGTGAAAACCCACTCTCCAGCCAGTAGCACTCCTCCAGCAAAAACTCCAATACC	GCGGAAAGGGCCACTGTGAAAACCCACTGTCCAGCCAATACTACTCCACCAACTAAGACTCCAATGCC	69	1254	KAG6431038.1	phosphatidate cytidylyltransferase [EC:2.7.7.41]	K00981
488	KAG6428786.1	88.06	67	8	0	1	67	591	657	3.92e-17	86	KAG6428786.1	94	59	59	0	88.06	1	1	TGCAGAAAGGAGGCTACATGATGATTTATGGTGTGGATCCAAATCATTAGAGTTTGAGGGGCCTTCC	TGCAGAGAGGAGACTACACGACGATTTATGGTGTGGATCCAAATCACTAGAGCACGAGGGGCCTTCC	69	975	KAG6428786.1	DNA-dependent metalloprotease WSS1 [EC:3.4.24.-]	K22685
488	KAG6425767.1	85.075	67	10	0	1	67	477	543	2.03e-14	77	KAG6425767.1	84	57	57	0	85.07	1	1	TGCAGAAAGGAGGCTACATGATGATTTATGGTGTGGATCCAAATCATTAGAGTTTGAGGGGCCTTCC	TGCAGAGAGGAGACTGCATGACGACTTATGGTGTGGATCCAAATCACTAGAGCACCAGGGGCCTTCC	69	750	KAG6425767.1	Hypothetical protein	Uncharacterized protein
489	KAG6425586.1	94.643	56	3	0	1	56	675	620	1.12e-17	88.7	KAG6425586.1	97	53	53	0	94.64	1	-1	TGCAGAAAGGCCCCTGCTTTCTGTTCCAACAACTTCACCCAGGGCAAGCAACTCCT	TGCAGGAAGGCCCCTGCTTTCTGTTCCAACAACTTCACCGAGGGCAAGCAGCTCCT	69	900	KAG6425586.1	E3 ubiquitin-protein ligase BIG BROTHER and related proteins [EC:2.3.2.27]	K19045
489	KAG6405460.1	87.5	56	7	0	1	56	105	50	3.01e-12	70.7	KAG6405460.1	77	49	49	0	87.5	1	-1	TGCAGAAAGGCCCCTGCTTTCTGTTCCAACAACTTCACCCAGGGCAAGCAACTCCT	TGCAGAAAGACCCCTGCTCTCTGTTCCAACAACTTCTCCTAATGCAATCAACTCCT	69	348	KAG6405460.1	E3 ubiquitin-protein ligase BIG BROTHER and related proteins [EC:2.3.2.27]	K19045
489	KAG6407663.1	85.714	56	8	0	1	56	711	656	3.67e-11	66.2	KAG6407663.1	72	48	48	0	85.71	1	-1	TGCAGAAAGGCCCCTGCTTTCTGTTCCAACAACTTCACCCAGGGCAAGCAACTCCT	TGCAGCAAGACCCCTGCTCTCTGTTCCAACAACTTCTCCTAATGCAATCAACTCCT	69	783	KAG6407663.1	E3 ubiquitin-protein ligase BIG BROTHER and related proteins [EC:2.3.2.27]	K19045
503	KAG6428378.1	93.75	48	3	0	1	48	1857	1810	2.47e-13	74.3	KAG6428378.1	81	45	45	0	93.75	1	-1	TGCAGAAAGGTGGGAAGGTTGTTCAAGTTTTCTGGTCAGACACTTCCC	TGCAGAAACGTGGGAAGGTTGTTCAAGATTTCTGGTCAGACATTTCCC	69	2646	KAG6428378.1	Hypothetical protein	Uncharacterized protein
503	KAG6431469.1	93.75	48	3	0	1	48	1413	1366	2.47e-13	74.3	KAG6431469.1	81	45	45	0	93.75	1	-1	TGCAGAAAGGTGGGAAGGTTGTTCAAGTTTTCTGGTCAGACACTTCCC	TGCAGAAACGTGGGAAGGTTGTTCAAGATTTCTGGTCAGACATTTCCC	69	2427	KAG6431469.1	long-chain acyl-CoA synthetase [EC:6.2.1.3]	K01897
511	KAG6397767.1	91.304	46	4	0	1	46	1116	1161	3.67e-11	66.2	KAG6397767.1	72	42	42	0	91.3	1	1	TGCAGAAAGTAGGGCAGAAAGTGCAGAAGAAAAAGTTTCACAGTTA	TGCAGAAAGTAGGGCCGGAAGTGCAGAGGAAAAAGTTTCACAATTA	69	1956	KAG6397767.1	Hypothetical protein	Uncharacterized protein
511	KAG6399939.1	91.304	46	4	0	1	46	1218	1263	3.67e-11	66.2	KAG6399939.1	72	42	42	0	91.3	1	1	TGCAGAAAGTAGGGCAGAAAGTGCAGAAGAAAAAGTTTCACAGTTA	TGCAGAAAGTAGGGCTGAAAGTGCAGAGGAAAAAGTTTCTCAATTA	69	2067	KAG6399939.1	Hypothetical protein	Uncharacterized protein
512	KAG6403395.1	89.855	69	7	0	1	69	73	5	2.64e-19	94.2	KAG6403395.1	103	62	62	0	89.86	1	-1	TGCAGAAAGTAGTGTACAACCCTCGATCCACCTCATCGAGCCGCGTAGCATCGGATTTTCTCTTCTTGG	TGCAGAAAGTGGTGTACATCCCTCGATCGACCTCATCGAGGCGCGTGGCTTCGGATTTCCTCTTCTTGG	69	621	KAG6403395.1	Hypothetical protein	Uncharacterized protein
512	KAG6394546.1	81.818	66	12	0	2	67	72	7	3.67e-11	66.2	KAG6394546.1	72	54	54	0	81.82	1	-1	GCAGAAAGTAGTGTACAACCCTCGATCCACCTCATCGAGCCGCGTAGCATCGGATTTTCTCTTCTT	GCAGAAGGCGGTGTACATGCCACGATCCACCTCGTCCAGTCGCGTCGCGTCGGATTTCCTCTTCTT	69	621	KAG6394546.1	Hypothetical protein	Uncharacterized protein
516	KAG6395637.1	92.647	68	5	0	2	69	1390	1457	1.78e-21	101	KAG6395637.1	111	63	63	0	92.65	1	1	GCAGAAAGTGAAACTGGTTTACTTCAGTCACTTACTGTCTTGAATGGGAAGACTGTGCCACTTGTCCG	GCAGAAAGTGAAACTGGTTTACTTCAATCACTTGTTGTCTTGAATGGGAAGACTGTACCACTTGTTCG	69	1707	KAG6395637.1	peptide-O-fucosyltransferase [EC:2.4.1.221]	K03691
516	KAG6397905.1	91.304	69	6	0	1	69	1401	1469	6.21e-21	98.7	KAG6397905.1	108	63	63	0	91.3	1	1	TGCAGAAAGTGAAACTGGTTTACTTCAGTCACTTACTGTCTTGAATGGGAAGACTGTGCCACTTGTCCG	TGCAGAAAGTGAAACTGGTTTACTTCAATCACTTGTTGTCTTGAATGGGAAGACCGTACCACTTGTTCG	69	1719	KAG6397905.1	peptide-O-fucosyltransferase [EC:2.4.1.221]	K03691
516	KAG6428795.1	89.394	66	7	0	1	66	1401	1466	1.12e-17	88.7	KAG6428795.1	97	59	59	0	89.39	1	1	TGCAGAAAGTGAAACTGGTTTACTTCAGTCACTTACTGTCTTGAATGGGAAGACTGTGCCACTTGT	TGCAGAAAGTGAAACTGGTTTACTTCAATCACTTGTTGTCTTGAACAGGAAGACTGTACCGCTTGT	69	1719	KAG6428795.1	peptide-O-fucosyltransferase [EC:2.4.1.221]	K03691
517	KAG6395637.1	94.118	68	4	0	2	69	1390	1457	4.18e-23	105	KAG6395637.1	116	64	64	0	94.12	1	1	GCAGAAAGTGAAACTGGTTTGCTTCAGTCACTTACTGTCTTGAATGGGAAGACTGTACCACTTGTTCG	GCAGAAAGTGAAACTGGTTTACTTCAATCACTTGTTGTCTTGAATGGGAAGACTGTACCACTTGTTCG	69	1707	KAG6395637.1	peptide-O-fucosyltransferase [EC:2.4.1.221]	K03691
517	KAG6397905.1	92.754	69	5	0	1	69	1401	1469	5.1e-22	103	KAG6397905.1	113	64	64	0	92.75	1	1	TGCAGAAAGTGAAACTGGTTTGCTTCAGTCACTTACTGTCTTGAATGGGAAGACTGTACCACTTGTTCG	TGCAGAAAGTGAAACTGGTTTACTTCAATCACTTGTTGTCTTGAATGGGAAGACCGTACCACTTGTTCG	69	1719	KAG6397905.1	peptide-O-fucosyltransferase [EC:2.4.1.221]	K03691
517	KAG6428795.1	89.706	68	7	0	1	68	1401	1468	9.22e-19	92.4	KAG6428795.1	101	61	61	0	89.71	1	1	TGCAGAAAGTGAAACTGGTTTGCTTCAGTCACTTACTGTCTTGAATGGGAAGACTGTACCACTTGTTC	TGCAGAAAGTGAAACTGGTTTACTTCAATCACTTGTTGTCTTGAACAGGAAGACTGTACCGCTTGTTC	69	1719	KAG6428795.1	peptide-O-fucosyltransferase [EC:2.4.1.221]	K03691
522	KAG6394328.1	98.387	62	0	1	1	62	744	804	1.46e-22	104	KAG6394328.1	115	61	61	1	98.39	1	1	TGCAGAAAGTGCCAGAGAAGGCATTCTTAGCATATGGGATACAGCAGATATTATTACAGATC	TGCAGAAAGTGCCAGAGAAGGCATTCTTAGCATATGGGATACAGCAGATATTATTA-AGATC	69	1191	KAG6394328.1	fructokinase [EC:2.7.1.4]	K00847
522	KAG6383073.1	96.774	62	1	1	1	62	696	756	1.78e-21	100	KAG6383073.1	110	60	60	1	96.77	1	1	TGCAGAAAGTGCCAGAGAAGGCATTCTTAGCATATGGGATACAGCAGATATTATTACAGATC	TGCAGAAAGTGCCAGAGAAGGCATTCTTAGCATATGGGATACAGCAGAAATTATTA-AGATC	69	1143	KAG6383073.1	fructokinase [EC:2.7.1.4]	K00847
522	KAG6382336.1	96.774	62	1	1	1	62	696	756	1.78e-21	100	KAG6382336.1	110	60	60	1	96.77	1	1	TGCAGAAAGTGCCAGAGAAGGCATTCTTAGCATATGGGATACAGCAGATATTATTACAGATC	TGCAGAAAGTGCCAGAGAAGGCATTCTTAGCATATGGGATACAGCAGAAATTATTA-AGATC	69	1143	KAG6382336.1	fructokinase [EC:2.7.1.4]	K00847
525	KAG6403395.1	92.537	67	5	0	1	67	73	7	6.21e-21	99.6	KAG6403395.1	109	62	62	0	92.54	1	-1	TGCAGAAAGTGGTATACATCCCTCGATCCACCTCATCGAGGCGCGTCGCGTCTGATTTCCTCTTCTT	TGCAGAAAGTGGTGTACATCCCTCGATCGACCTCATCGAGGCGCGTGGCTTCGGATTTCCTCTTCTT	69	621	KAG6403395.1	Hypothetical protein	Uncharacterized protein
525	KAG6386736.1	91.304	69	6	0	1	69	73	5	6.21e-21	98.7	KAG6386736.1	108	63	63	0	91.3	1	-1	TGCAGAAAGTGGTATACATCCCTCGATCCACCTCATCGAGGCGCGTCGCGTCTGATTTCCTCTTCTTCG	TGCAGAAAGTGGTGTACATCCCTCGATCGACCTCGTCGAGGCGCGACGCTTCGGATTTCCTCTTCTTCG	69	540	KAG6386736.1	Hypothetical protein	Uncharacterized protein
525	KAG6384931.1	91.045	67	6	0	1	67	73	7	7.56e-20	95.1	KAG6384931.1	104	61	61	0	91.04	1	-1	TGCAGAAAGTGGTATACATCCCTCGATCCACCTCATCGAGGCGCGTCGCGTCTGATTTCCTCTTCTT	TGCAGAAAGTGGTGTACATCCCTCGATCGACCTCGTCGAGGCGCGACGCTTCGGATTTCCTCTTCTT	69	642	KAG6384931.1	Hypothetical protein	Uncharacterized protein
531	KAG6396060.1	81.159	69	13	0	1	69	419	487	3.67e-11	67.1	KAG6396060.1	73	56	56	0	81.16	1	1	TGCAGAAAGTTATGTGTGCTCTGGGATTGAAGGAAGGATTGGAAGTGGAGAATTGCAGGAGAATGATTG	TGCAGAGGGTTCTGTGTGGTCTTGGATTCAAGGAAGGGATGGAGATTCAGAATTGCAGGAGGATGATTG	69	564	KAG6396060.1	calmodulin	K02183
535	KAG6401842.1	92.188	64	5	0	5	68	387	450	2.64e-19	94.2	KAG6401842.1	103	59	59	0	92.19	1	1	GAAAGTTCATCATGCAGGAGAACCTATGCCTGGTGAAGAGCAAGAGGACATAGTAATGACCAGC	GAAAGTTCATCACGAAGGACAACCTATGCCAGGTGAAGAGCAAGAGGACATAATAATGACCAGC	69	753	KAG6401842.1	E3 SUMO-protein ligase NSE2 [EC:2.3.2.-]	K22756
535	KAG6404118.1	92.188	64	5	0	5	68	330	393	2.64e-19	94.2	KAG6404118.1	103	59	59	0	92.19	1	1	GAAAGTTCATCATGCAGGAGAACCTATGCCTGGTGAAGAGCAAGAGGACATAGTAATGACCAGC	GAAAGTTCATCACGAAGGACAACCTATGCCAGGTGAAGAGCAAGAGGACATAATAATGACCAGC	69	696	KAG6404118.1	E3 SUMO-protein ligase NSE2 [EC:2.3.2.-]	K22756
535	KAG6404138.1	92.188	64	5	0	5	68	330	393	2.64e-19	94.2	KAG6404138.1	103	59	59	0	92.19	1	1	GAAAGTTCATCATGCAGGAGAACCTATGCCTGGTGAAGAGCAAGAGGACATAGTAATGACCAGC	GAAAGTTCATCACGAAGGACAACCTATGCCAGGTGAAGAGCAAGAGGACATAATAATGACCAGC	69	618	KAG6404138.1	E3 SUMO-protein ligase NSE2 [EC:2.3.2.-]	K22756
541	KAG6422469.1	97.101	69	2	0	1	69	1986	2054	2.31e-26	116	KAG6422469.1	128	67	67	0	97.1	1	1	TGCAGAAATAACTCGTCTTGGCTTGTTAGCGGAACCTATGCTGTCTCTGGATGCAATTGCCATGCACAT	TGCAGAAATAACTCGTCTTGGCTTGTTAGCTGAACCTATGCTGTCTTTGGATGCAATTGCCATGCACAT	69	3180	KAG6422469.1	retinoblastoma-like protein 1	K04681
541	KAG6425568.1	95.652	69	3	0	1	69	1920	1988	9.84e-25	112	KAG6425568.1	123	66	66	0	95.65	1	1	TGCAGAAATAACTCGTCTTGGCTTGTTAGCGGAACCTATGCTGTCTCTGGATGCAATTGCCATGCACAT	TGCAGAAATAACTCGTCTTGGCTTGTTAGCTGAACCTATGCCGTCTTTGGATGCAATTGCCATGCACAT	69	3114	KAG6425568.1	retinoblastoma-like protein 1	K04681
541	KAG6426675.1	95.652	69	3	0	1	69	1836	1904	9.84e-25	112	KAG6426675.1	123	66	66	0	95.65	1	1	TGCAGAAATAACTCGTCTTGGCTTGTTAGCGGAACCTATGCTGTCTCTGGATGCAATTGCCATGCACAT	TGCAGAAGTAACTCGTCTTGGCTTGTTAGCCGAACCTATGCTGTCTTTGGATGCAATTGCCATGCACAT	69	3030	KAG6426675.1	retinoblastoma-like protein 1	K04681
552	KAG6410828.1	90.323	62	6	0	1	62	674	735	3.92e-17	86	KAG6410828.1	94	56	56	0	90.32	1	1	TGCAGAAATACGAAGCTACAATGAGACGCGAACGAGCATTAGCTTATTCATACACTCATCAG	TGCACAAATACGAAGCTGCAATGAGGCGAGAAAGAGCCTTAGCTTATTCATACACTCATCAG	69	1434	KAG6410828.1	Hypothetical protein	Uncharacterized protein
552	KAG6413434.1	88.71	62	7	0	1	62	674	735	1.67e-15	81.5	KAG6413434.1	89	55	55	0	88.71	1	1	TGCAGAAATACGAAGCTACAATGAGACGCGAACGAGCATTAGCTTATTCATACACTCATCAG	TGCACAAATACGAAGCTGCAATGAGGCGAGAAAGAGCCTTAGCTTACTCATACACTCATCAG	69	1434	KAG6413434.1	Hypothetical protein	Uncharacterized protein
552	KAG6401409.1	84.848	66	10	0	3	68	697	762	7.08e-14	75.2	KAG6401409.1	82	56	56	0	84.85	1	1	CAGAAATACGAAGCTACAATGAGACGCGAACGAGCATTAGCTTATTCATACACTCATCAGGTATAC	CAAAAATACGAAGCTGCAATGAGACGCGAAAGAGCTCTTGCTTATTCCTACACTCACCAGCTAAAC	69	1134	KAG6401409.1	Hypothetical protein	Uncharacterized protein
554	KAG6399365.1	85.714	56	8	0	1	56	527	582	3.67e-11	66.2	KAG6399365.1	72	48	48	0	85.71	1	1	TGCAGAAATACTTGAACATTCTCAAGCCATTGTACCTTCGCGTTGAGAAGATGAGG	TGCACAAGTACTTAAATATTCTCAAGCCTTTGTACGTCCGTGTTGAGAAGATGAGG	69	858	KAG6399365.1	Hypothetical protein	Uncharacterized protein
555	KAG6410383.1	91.525	59	5	0	1	59	816	874	1.37e-16	85.1	KAG6410383.1	93	54	54	0	91.53	1	1	TGCAGAAATACTTGTTGATTTTCGTGATATTTCAGTCAACAAGAATGAAAGTGAAAGTG	TGCCGAAATACTTGTTGATTTTGATAATATTTCAGTCAACAAGAAGGAAAGTGAAAGTG	69	1572	KAG6410383.1	thiol oxidase [EC:1.8.3.2]	K10758
555	KAG6412973.1	84.058	69	11	0	1	69	2349	2417	7.08e-14	76.1	KAG6412973.1	83	58	58	0	84.06	1	1	TGCAGAAATACTTGTTGATTTTCGTGATATTTCAGTCAACAAGAATGAAAGTGAAAGTGTTGGCGAGAA	TGCCGAAATACTTGTTGATTTTGATAATATTTCAGTCAACAAGAAGGAAGCTGAAGGTGGCGTCGAGAA	69	3186	KAG6412973.1	thiol oxidase [EC:1.8.3.2]	K10758
555	KAG6389879.1	84.746	59	9	0	1	59	777	835	3.67e-11	67.1	KAG6389879.1	73	50	50	0	84.75	1	1	TGCAGAAATACTTGTTGATTTTCGTGATATTTCAGTCAACAAGAATGAAAGTGAAAGTG	TGCCGAAATACTTGTTGATTTTGATAACATTTCAGTCGACAAGAAAGAAACAGAAAGTG	69	2268	KAG6389879.1	thiol oxidase [EC:1.8.3.2]	K10758
557	KAG6423195.1	88.406	69	8	0	1	69	1467	1399	3.22e-18	89.7	KAG6423195.1	98	61	61	0	88.41	1	-1	TGCAGAAATAGACTGGTGGGAGAAAAAATCTTGAGCATCTGAAGAACTGCCACTTTCTGGCTCTTCATC	TGCAGGAATAGACTGGTGTGAAAAAATATCTTGAACATCTGAGGAACTGCCATTTTCGGGCTCTTCATC	69	2709	KAG6423195.1	Hypothetical protein	Uncharacterized protein
558	KAG6423195.1	88.406	69	8	0	1	69	1467	1399	3.22e-18	89.7	KAG6423195.1	98	61	61	0	88.41	1	-1	TGCAGAAATAGACTGGTGGGAGAAAAAATCTTGAGCATCTGAAGAACTGCCACTTTCTGGCTCTTCATC	TGCAGGAATAGACTGGTGTGAAAAAATATCTTGAACATCTGAGGAACTGCCATTTTCGGGCTCTTCATC	69	2709	KAG6423195.1	Hypothetical protein	Uncharacterized protein
584	KAG6419627.1	95.161	62	3	0	1	62	649	588	6.21e-21	99.6	KAG6419627.1	109	59	59	0	95.16	1	-1	TGCAGAAATCAATGACAACATACAAATGAGAACTCCCATTTTTCAGGCTCTCGCGTTCCTTA	TGCAGAAATCAATGATGACATACAAATGAGAACTCCCATTTTTCAAGCTCTCGCGTTCCTTA	69	2886	KAG6419627.1	phosphatidylinositol 3-kinase [EC:2.7.1.137]	K00914
584	KAG6404765.1	91.935	62	5	0	1	62	649	588	3.22e-18	90.6	KAG6404765.1	99	57	57	0	91.94	1	-1	TGCAGAAATCAATGACAACATACAAATGAGAACTCCCATTTTTCAGGCTCTCGCGTTCCTTA	TGCAGAAATCAATGAAAACGTACAAATGAGAACTCCCGTTTTTCAAGCTCTCGCGTTCTTTA	69	3504	KAG6404765.1	phosphatidylinositol 3-kinase [EC:2.7.1.137]	K00914
584	KAG6406974.1	88.71	62	7	0	1	62	1738	1677	1.67e-15	81.5	KAG6406974.1	89	55	55	0	88.71	1	-1	TGCAGAAATCAATGACAACATACAAATGAGAACTCCCATTTTTCAGGCTCTCGCGTTCCTTA	TGCAAAAATCAATGACAACGTACAAATGAGAACTCCCGTTTTTCAAACTCTCACGTTCTTTA	69	4611	KAG6406974.1	phosphatidylinositol 3-kinase [EC:2.7.1.137]	K00914
586	KAG6415167.1	95.385	65	3	0	1	65	627	563	1.46e-22	104	KAG6415167.1	115	62	62	0	95.38	1	-1	TGCAGAAATCACTGTATCGTATTCATGGTTGTACTTCATAGATTTTATTGGTCCCAGGTGTATCT	TGCAGAAATCACAGTATCGTATTCATGGTTGTACTTCATAGATTTTATCGGTCCAAGGTGTATCT	69	1860	KAG6415167.1	peptidylprolyl isomerase domain and WD repeat-containing protein 1 [EC:5.2.1.8]	K12736
586	KAG6417683.1	95.312	64	3	0	1	64	627	564	5.1e-22	103	KAG6417683.1	113	61	61	0	95.31	1	-1	TGCAGAAATCACTGTATCGTATTCATGGTTGTACTTCATAGATTTTATTGGTCCCAGGTGTATC	TGCAGAAATCACAGTATCGTATTCATGGTTGTACTTCATAGATTTTATCGGTCCAAGGTGTATC	69	1398	KAG6417683.1	Hypothetical protein	Uncharacterized protein
590	KAG6430540.1	86.957	69	9	0	1	69	1396	1328	1.37e-16	85.1	KAG6430540.1	93	60	60	0	86.96	1	-1	TGCAGAAATCCAAGAAGCCCATGAACTCATGGTTGTTTATCATCTTGATGCTTTTCTCTATCCCAATCA	TGCAAAAATCTAAGAACCCCATGAACTCGTGATTGTGTATCATCTTCACGCTTTTATCTATCCCAATCA	69	1407	KAG6430540.1	Hypothetical protein	Uncharacterized protein
590	KAG6427484.1	85.507	69	10	0	1	69	1390	1322	1.67e-15	80.6	KAG6427484.1	88	59	59	0	85.51	1	-1	TGCAGAAATCCAAGAAGCCCATGAACTCATGGTTGTTTATCATCTTGATGCTTTTCTCTATCCCAATCA	TGCAAAAATCTAAGAACCCCATGAACTCGTGGTTGTGCATCATCTTCACGCTTTTATCTATCCCGATCA	69	1401	KAG6427484.1	Hypothetical protein	Uncharacterized protein
592	KAG6436056.1	88.406	69	8	0	1	69	2443	2375	3.22e-18	89.7	KAG6436056.1	98	61	61	0	88.41	1	-1	TGCAGAAATCCCAAGGCGTGGGCTTTACATGGAGAGCAGCTTGAACTTGAGGTGTATTCAAGTAGTACT	TGCAGAAGTCCCAAGCTGTGGGCTTCACATGGAGAGCATCTTGGACTTGAGGAGTATTCAAGTAATACT	69	2769	KAG6436056.1	cyclin-dependent kinase 12/13 [EC:2.7.11.22 2.7.11.23]	K08819
592	KAG6432730.1	85.507	69	10	0	1	69	1132	1064	1.67e-15	80.6	KAG6432730.1	88	59	59	0	85.51	1	-1	TGCAGAAATCCCAAGGCGTGGGCTTTACATGGAGAGCAGCTTGAACTTGAGGTGTATTCAAGTAGTACT	TGCAGAAGTCCCAAGCTGTGGGATTCACATGGAGAGCATCTTGGACTCGAGGAGTATTCAAGTAATACT	69	1470	KAG6432730.1	serine carboxypeptidase-like clade II [EC:3.4.16.-]	K16297
594	KAG6396392.1	88.406	69	8	0	1	69	2160	2228	3.22e-18	89.7	KAG6396392.1	98	61	61	0	88.41	1	1	TGCAGAAATCGAGCTTTTTGAGGTTTACGATGTCGTTCTTTACCTTGGCATAATTGATATATTACAGGA	TGCTGAAACCGAGCTCTTTGAGGTGTATGACGTGGTTCTTTACCTTGGCATAATCGATATATTACAGGA	69	2367	KAG6396392.1	1-phosphatidylinositol-4-phosphate 5-kinase [EC:2.7.1.68]	K00889
594	KAG6398682.1	88.406	69	8	0	1	69	2154	2222	3.22e-18	89.7	KAG6398682.1	98	61	61	0	88.41	1	1	TGCAGAAATCGAGCTTTTTGAGGTTTACGATGTCGTTCTTTACCTTGGCATAATTGATATATTACAGGA	TGCTGAAACCGAACTCTTTGAGGTGTACGACGTGGTTCTTTACCTTGGCATAATCGATATATTACAGGA	69	2361	KAG6398682.1	1-phosphatidylinositol-4-phosphate 5-kinase [EC:2.7.1.68]	K00889
597	KAG6430540.1	86.957	69	9	0	1	69	1396	1328	1.37e-16	85.1	KAG6430540.1	93	60	60	0	86.96	1	-1	TGCAGAAATCTAAGAACCCCATGAACTCATGGTTGTTTATCATCTTGATGCTCTTCTCTATCCCAACCA	TGCAAAAATCTAAGAACCCCATGAACTCGTGATTGTGTATCATCTTCACGCTTTTATCTATCCCAATCA	69	1407	KAG6430540.1	Hypothetical protein	Uncharacterized protein
597	KAG6427484.1	87.5	64	8	0	1	64	1390	1327	1.67e-15	80.6	KAG6427484.1	88	56	56	0	87.5	1	-1	TGCAGAAATCTAAGAACCCCATGAACTCATGGTTGTTTATCATCTTGATGCTCTTCTCTATCCC	TGCAAAAATCTAAGAACCCCATGAACTCGTGGTTGTGCATCATCTTCACGCTTTTATCTATCCC	69	1401	KAG6427484.1	Hypothetical protein	Uncharacterized protein
606	KAG6425413.1	82.09	67	12	0	1	67	16	82	1.05e-11	68	KAG6425413.1	74	55	55	0	82.09	1	1	TGCAGAAATCTGGGCGACCCGACAGTCGCGCCGGACGGCGCTGCCGACTCGGCCCTCACCCTCCCAA	TGCAGAAAGCTCGGTGATCCGACAGTCGCGCCGGAGGGGAGTGACGACTCCGCCCTGACCCTCTCAA	69	1038	KAG6425413.1	NADPH:quinone reductase [EC:1.6.5.5]	K00344
607	KAG6421037.1	88.136	59	7	0	11	69	971	913	7.08e-14	76.1	KAG6421037.1	83	52	52	0	88.14	1	-1	TGGTGATGCTGCTCGAGGGCCACGTGATGCTGTCCCATGTCACGCTCTCCGCACGTGCC	TGATGGTGCGGCTCATGGGTCACGTGATGCTGTCCCATGTCACGCTCTTCGCACGTGCC	69	1314	KAG6421037.1	Hypothetical protein	Uncharacterized protein
607	KAG6424079.1	88.136	59	7	0	11	69	965	907	7.08e-14	76.1	KAG6424079.1	83	52	52	0	88.14	1	-1	TGGTGATGCTGCTCGAGGGCCACGTGATGCTGTCCCATGTCACGCTCTCCGCACGTGCC	TGATGGTGCGGCTCATGGGTCACGTGATGCTGTCCCATGTCACGCTCTTCGCACGTGCC	69	1338	KAG6424079.1	Hypothetical protein	Uncharacterized protein
615	KAG6433288.1	91.304	69	6	0	1	69	937	1005	6.21e-21	98.7	KAG6433288.1	108	63	63	0	91.3	1	1	TGCAGAAATGAAGCTGATGAGAAACGGTTGCAATACTTGAAGGATCGGGCCAAAGAGCTTAGATTGGAT	TGCAGGAATGAAGCTGATGAGAAAAGATTGCAATACTTGAAGGAGCGAGCCAAAGAGCTTAAATTGGAT	69	1395	KAG6433288.1	alpha-1,2-mannosyltransferase [EC:2.4.1.131]	K03844
615	KAG6436593.1	91.304	69	6	0	1	69	937	1005	6.21e-21	98.7	KAG6436593.1	108	63	63	0	91.3	1	1	TGCAGAAATGAAGCTGATGAGAAACGGTTGCAATACTTGAAGGATCGGGCCAAAGAGCTTAGATTGGAT	TGCAGGAATGAAGCTGATGAGAAAAGATTGCAATACTTGAAGGACCGAGCCAAAGAGCTTAAATTGGAT	69	1395	KAG6436593.1	alpha-1,2-mannosyltransferase [EC:2.4.1.131]	K03844
615	KAG6395394.1	85.507	69	10	0	1	69	862	930	1.67e-15	80.6	KAG6395394.1	88	59	59	0	85.51	1	1	TGCAGAAATGAAGCTGATGAGAAACGGTTGCAATACTTGAAGGATCGGGCCAAAGAGCTTAGATTGGAT	TGTAGGAATGAAGCCGATGAGAAAAGATTGCAACACTTGAAGGATCGGACCAAGGAGCTTGAATTGGAT	69	1329	KAG6395394.1	alpha-1,2-mannosyltransferase [EC:2.4.1.131]	K03844
618	KAG6411378.1	92.754	69	5	0	1	69	330	262	5.1e-22	103	KAG6411378.1	113	64	64	0	92.75	1	-1	TGCAGAAATGAATCCGTTTTGGTCCTTGTCAAAAACACGGAAAGCTTCCTTTAGTTCCTCCTCTGAATC	TGCAGAAATGAATCCATTCTGGTCCTTGTCAAAAACACGGAAAGCTTCCTTGAGCTCTTCCTCTGAATC	69	1713	KAG6411378.1	calmodulin	K02183
618	KAG6414006.1	92.754	69	5	0	1	69	609	541	5.1e-22	103	KAG6414006.1	113	64	64	0	92.75	1	-1	TGCAGAAATGAATCCGTTTTGGTCCTTGTCAAAAACACGGAAAGCTTCCTTTAGTTCCTCCTCTGAATC	TGCAGAAATGAATCCATTCTGGTCCTTGTCAAAAACACGGAAAGCTTCCTTGAGCTCTTCCTCTGAATC	69	1473	KAG6414006.1	Hypothetical protein	Uncharacterized protein
618	KAG6433605.1	92.754	69	5	0	1	69	309	241	5.1e-22	103	KAG6433605.1	113	64	64	0	92.75	1	-1	TGCAGAAATGAATCCGTTTTGGTCCTTGTCAAAAACACGGAAAGCTTCCTTTAGTTCCTCCTCTGAATC	TGCAGAAATGAATCCATTTTGGTCTTTGTCGAAAACACGGAAAGCTTCCTTCAGTTCTTCCTCTGAATC	69	450	KAG6433605.1	calmodulin	K02183
620	KAG6384972.1	82.609	69	12	0	1	69	633	565	8.63e-13	71.6	KAG6384972.1	78	57	57	0	82.61	1	-1	TGCAGAAATGACTTTCTTGACTTGCTCATGGTTGACATCTTCAAATTCAAAACCACCAGCAAACTCTCT	TGCAGAAATGGCCTTCTTTACTTGTTCATGGCTGAGGTCTTCAAAGTGACAATTACCAGCAAACTCTCT	69	3063	KAG6384972.1	telomere length regulation protein	K11137
620	KAG6386786.1	81.159	69	13	0	1	69	663	595	3.67e-11	67.1	KAG6386786.1	73	56	56	0	81.16	1	-1	TGCAGAAATGACTTTCTTGACTTGCTCATGGTTGACATCTTCAAATTCAAAACCACCAGCAAACTCTCT	TGCAGAAATGGCCTTCTTTACTTGTTCATGGCAGAGGTCTTCAAAGTGACAATTACCAGCAAACTCTCT	69	4173	KAG6386786.1	Hypothetical protein	Uncharacterized protein
627	KAG6412969.1	85.507	69	10	0	1	69	1779	1847	1.67e-15	80.6	KAG6412969.1	88	59	59	0	85.51	1	1	TGCAGAAATGATCTTTTCCTTAGAACCATGGAACTCCGGTATGTACGTTCTTCTCTCCAACTTATACGC	TGCTGAAATGATCTTTGCTTTGGAGCCATGGAATTCTGGGATGTATGTTCTTCTTTCCAACTTATACGC	69	2325	KAG6412969.1	Hypothetical protein	Uncharacterized protein
630	KAG6434620.1	88.406	69	8	0	1	69	1011	943	3.22e-18	89.7	KAG6434620.1	98	61	61	0	88.41	1	-1	TGCAGAAATGATTGCCTTCGCAATGTCTTTGATGAATAATGGACAAGCTTGAAAGTCATTTTTAGTATC	TGCAGAAATTATAGCTTTTGCAATGTCTTTGATGAATAACGGGCAAGCTTGAAAGTCATTACTAGTATC	69	3648	KAG6434620.1	gamma-tubulin complex component 5	K16572
632	KAG6391788.1	95.652	69	3	0	1	69	2868	2936	9.84e-25	112	KAG6391788.1	123	66	66	0	95.65	1	1	TGCAGAAATGCAACGCCAAAAGCTGAAGAAACTAATGGATGAGCTAAATGAGGACGGTGATGGTCGTTC	TGCAGAAATGCAACGGCAAAAGCTGAAGAAACTAATGGATGAGCTAAACGAGGATGGTGATGGTCGTTC	69	3750	KAG6391788.1	manganese-transporting P-type ATPase [EC:7.2.2.-]	K14950
632	KAG6390024.1	94.203	69	4	0	1	69	2916	2984	1.2e-23	107	KAG6390024.1	118	65	65	0	94.2	1	1	TGCAGAAATGCAACGCCAAAAGCTGAAGAAACTAATGGATGAGCTAAATGAGGACGGTGATGGTCGTTC	TGCAGAAATGCAACGCCAAAAGCTGAAGAAACTAATGGATGAGCTAAACGAAGATGGTGATGGACGTTC	69	3798	KAG6390024.1	manganese-transporting P-type ATPase [EC:7.2.2.-]	K14950
636	KAG6432924.1	93.22	59	4	0	11	69	2192	2134	3.22e-18	89.7	KAG6432924.1	98	55	55	0	93.22	1	-1	CCTTCAGGTTTCTCAAAAGCCACAAATGTTTGGGCTGGTGTATCGTAAGGAAGAGATTT	CCTTCAGCTTTCTCAAATGCCACAAATGTTTGGGCTGGTGTATCATAAGGAAGTGATTT	69	2679	KAG6432924.1	coatomer subunit gamma	K17267
636	KAG6436241.1	93.22	59	4	0	11	69	2291	2233	3.22e-18	89.7	KAG6436241.1	98	55	55	0	93.22	1	-1	CCTTCAGGTTTCTCAAAAGCCACAAATGTTTGGGCTGGTGTATCGTAAGGAAGAGATTT	CCTTCAGCTTTCTCAAATGCCACAAATGTTTGGGCTGGTGTATCATAAGGAAGTGATTT	69	2778	KAG6436241.1	coatomer subunit gamma	K17267
636	KAG6417539.1	91.525	59	5	0	11	69	2189	2131	1.37e-16	85.1	KAG6417539.1	93	54	54	0	91.53	1	-1	CCTTCAGGTTTCTCAAAAGCCACAAATGTTTGGGCTGGTGTATCGTAAGGAAGAGATTT	CCTTCAGGTCTCTCAAATGCCACGAATGTTTGGGCTGGTGTATCATAAGGAAGTGATTT	69	2676	KAG6417539.1	coatomer subunit gamma	K17267
637	KAG6432924.1	94.915	59	3	0	11	69	2192	2134	2.64e-19	94.2	KAG6432924.1	103	56	56	0	94.92	1	-1	CCTTCAGGTTTCTCAAATGCCACAAATGTTTGTGCTGGTGTATCATAAGGAAGAGATTT	CCTTCAGCTTTCTCAAATGCCACAAATGTTTGGGCTGGTGTATCATAAGGAAGTGATTT	69	2679	KAG6432924.1	coatomer subunit gamma	K17267
637	KAG6436241.1	94.915	59	3	0	11	69	2291	2233	2.64e-19	94.2	KAG6436241.1	103	56	56	0	94.92	1	-1	CCTTCAGGTTTCTCAAATGCCACAAATGTTTGTGCTGGTGTATCATAAGGAAGAGATTT	CCTTCAGCTTTCTCAAATGCCACAAATGTTTGGGCTGGTGTATCATAAGGAAGTGATTT	69	2778	KAG6436241.1	coatomer subunit gamma	K17267
637	KAG6417539.1	93.22	59	4	0	11	69	2189	2131	3.22e-18	89.7	KAG6417539.1	98	55	55	0	93.22	1	-1	CCTTCAGGTTTCTCAAATGCCACAAATGTTTGTGCTGGTGTATCATAAGGAAGAGATTT	CCTTCAGGTCTCTCAAATGCCACGAATGTTTGGGCTGGTGTATCATAAGGAAGTGATTT	69	2676	KAG6417539.1	coatomer subunit gamma	K17267
638	KAG6432924.1	94.915	59	3	0	11	69	2192	2134	2.64e-19	94.2	KAG6432924.1	103	56	56	0	94.92	1	-1	CCTTCAGGTTTCTCAAATGCCACAAATGTTTGTGCTGGTGTATCATAAGGAAGAGATTT	CCTTCAGCTTTCTCAAATGCCACAAATGTTTGGGCTGGTGTATCATAAGGAAGTGATTT	69	2679	KAG6432924.1	coatomer subunit gamma	K17267
638	KAG6436241.1	94.915	59	3	0	11	69	2291	2233	2.64e-19	94.2	KAG6436241.1	103	56	56	0	94.92	1	-1	CCTTCAGGTTTCTCAAATGCCACAAATGTTTGTGCTGGTGTATCATAAGGAAGAGATTT	CCTTCAGCTTTCTCAAATGCCACAAATGTTTGGGCTGGTGTATCATAAGGAAGTGATTT	69	2778	KAG6436241.1	coatomer subunit gamma	K17267
638	KAG6417539.1	93.22	59	4	0	11	69	2189	2131	3.22e-18	89.7	KAG6417539.1	98	55	55	0	93.22	1	-1	CCTTCAGGTTTCTCAAATGCCACAAATGTTTGTGCTGGTGTATCATAAGGAAGAGATTT	CCTTCAGGTCTCTCAAATGCCACGAATGTTTGGGCTGGTGTATCATAAGGAAGTGATTT	69	2676	KAG6417539.1	coatomer subunit gamma	K17267
642	KAG6386192.1	92.063	63	5	0	3	65	331	393	9.22e-19	92.4	KAG6386192.1	101	58	58	0	92.06	1	1	CAGAAATGCGCCGACTTTGTGCACGCATTCATGCTCGGATTCGATGTGATCGACGCCGTGGCG	CAGAAGTGCGCCGACTTCGTGCACGCCTTCATGCTCGGATTCGACGTTATCGACGCCGTGGCG	69	699	KAG6386192.1	RNA-binding protein PNO1	K11884
642	KAG6387587.1	89.231	65	7	0	1	65	329	393	3.92e-17	86.9	KAG6387587.1	95	58	58	0	89.23	1	1	TGCAGAAATGCGCCGACTTTGTGCACGCATTCATGCTCGGATTCGATGTGATCGACGCCGTGGCG	TGCAGAAGTGCGCCGACTTCGTCCACGCCTTCATGCTCGGGTTCGACGTGATCGACGCGGTGGCG	69	489	KAG6387587.1	Hypothetical protein	Uncharacterized protein
642	KAG6385757.1	89.062	64	7	0	1	64	332	395	1.37e-16	85.1	KAG6385757.1	93	57	57	0	89.06	1	1	TGCAGAAATGCGCCGACTTTGTGCACGCATTCATGCTCGGATTCGATGTGATCGACGCCGTGGC	TGCAGAAGTGCGCCGACTTCGTCCACGCCTTCATGCTCGGGTTCGACGTGATCGACGCTGTGGC	69	702	KAG6385757.1	RNA-binding protein PNO1	K11884
645	KAG6391510.1	90.909	55	5	0	3	57	340	394	2.03e-14	77.9	KAG6391510.1	85	50	50	0	90.91	1	1	CAGAAATGCTTGGCTTTTAGTGTAGATGGAACTAGGTTTGCTGCTGGTGGAGTTG	CAGAAATGCTTGGCTTTTAGTGTTGATGGAACTAGATTTTCCACTGGTGGAGTTG	69	2346	KAG6391510.1	prolactin regulatory element-binding protein	K14003
645	KAG6410084.1	90.909	55	5	0	3	57	340	394	2.03e-14	77.9	KAG6410084.1	85	50	50	0	90.91	1	1	CAGAAATGCTTGGCTTTTAGTGTAGATGGAACTAGGTTTGCTGCTGGTGGAGTTG	CAAAAATGTTTGGCTTTTAGTGTTGATGGAACTAGATTTGCTACTGGTGGAGTTG	69	1182	KAG6410084.1	prolactin regulatory element-binding protein	K14003
645	KAG6389785.1	89.091	55	6	0	3	57	340	394	2.47e-13	73.4	KAG6389785.1	80	49	49	0	89.09	1	1	CAGAAATGCTTGGCTTTTAGTGTAGATGGAACTAGGTTTGCTGCTGGTGGAGTTG	CAGAAATGTTTGGCTTTTAGTGTTGATGGAACTAGATTTTCCACTGGTGGAGTTG	69	2226	KAG6389785.1	Hypothetical protein	Uncharacterized protein
646	KAG6429419.1	92.537	67	5	0	3	69	2011	2077	6.21e-21	99.6	KAG6429419.1	109	62	62	0	92.54	1	1	CAGAAATGGAATGAAATTATTGGACAGGCACGCCATAGTGTTGATTTCTTGAAAGATCAAGATGTGA	CAGAAATGGACTGAAATAATTGGACAGGCACGCCAGAGCGTAGATTTCTTGAAAGATCAAGATGTGA	69	3564	KAG6429419.1	exportin-1	K14290
646	KAG6426621.1	91.304	69	6	0	1	69	2357	2425	6.21e-21	98.7	KAG6426621.1	108	63	63	0	91.3	1	1	TGCAGAAATGGAATGAAATTATTGGACAGGCACGCCATAGTGTTGATTTCTTGAAAGATCAAGATGTGA	TGCAGAAATGGGGTGAAATAATTGGACAGGCACGCCAGAGCGTAGATTTCTTGAAAGATCAAGATGTGA	69	4053	KAG6426621.1	exportin-1	K14290
646	KAG6400739.1	84.615	65	10	0	3	67	2056	2120	2.47e-13	73.4	KAG6400739.1	80	55	55	0	84.62	1	1	CAGAAATGGAATGAAATTATTGGACAGGCACGCCATAGTGTTGATTTCTTGAAAGATCAAGATGT	CAGAAATGGACTGAAATCATTGGCCAAGCACACCAGAATGTGGATTTCTTGAAAGACCCAGATGT	69	3000	KAG6400739.1	Hypothetical protein	Uncharacterized protein
655	KAG6437770.1	93.478	46	3	0	1	46	3622	3667	3.01e-12	70.7	KAG6437770.1	77	43	43	0	93.48	1	1	TGCAGAAATGGTTCCAGTCCTTGTGATAACTGTCTCAAGTTACCTT	TGCAGAAATGGCTCCAATCCTTGTGATAACTGTCTCAAGTTATCTT	69	3672	KAG6437770.1	ATP-dependent DNA helicase Q1 [EC:3.6.4.12]	K10899
671	KAG6383508.1	94.203	69	4	0	1	69	1451	1519	1.2e-23	107	KAG6383508.1	118	65	65	0	94.2	1	1	TGCAGAAATGTTTTGAAGATTTGGAGTACTCATATCTTGTTGACCGAGCATTGGAATGGGGGAAACAGG	TGCAGAAATGCTTTGAAGATTTGGAGTACTCATATCTTGTTGACCAAGCTCTGGAATGGGGGAAACAGG	69	2556	KAG6383508.1	oxysterol-binding protein 1	K20456
671	KAG6422369.1	94.203	69	4	0	1	69	1409	1477	1.2e-23	107	KAG6422369.1	118	65	65	0	94.2	1	1	TGCAGAAATGTTTTGAAGATTTGGAGTACTCATATCTTGTTGACCGAGCATTGGAATGGGGGAAACAGG	TGCAGAAATGCTTTGAAGATTTGGAGTACTCATATCTTGTTGACCAAGCTCTGGAATGGGGGAAACAGG	69	4455	KAG6422369.1	oxysterol-binding protein 1	K20456
671	KAG6429271.1	89.855	69	7	0	1	69	1265	1333	2.64e-19	94.2	KAG6429271.1	103	62	62	0	89.86	1	1	TGCAGAAATGTTTTGAAGATTTGGAGTACTCATATCTTGTTGACCGAGCATTGGAATGGGGGAAACAGG	TGCAGAAATGCTTTGAAGATTTGGAGTACTCATATCTTGTCGACGAAGCTCTGAAATGGGGGAAACAGG	69	3534	KAG6429271.1	oxysterol-binding protein 1	K20456
686	KAG6410752.1	84.848	66	10	0	4	69	1403	1468	7.08e-14	75.2	KAG6410752.1	82	56	56	0	84.85	1	1	AGAAATTCAAATTTGCAGTATCTGAAGGATTTGACCCGGACAGGGACCTTCAGAGAGTTGGTATTG	AGAAATTTAAGTTTGCAGTATCCAAGGGATTTGACCCGGATAAGGATCTTGAGAAAGTTGGTATTG	69	1944	KAG6410752.1	4-hydroxy-3-methylbut-2-en-1-yl diphosphate reductase [EC:1.17.7.4]	K03527
686	KAG6410751.1	83.333	66	11	0	4	69	944	1009	3.01e-12	70.7	KAG6410751.1	77	55	55	0	83.33	1	1	AGAAATTCAAATTTGCAGTATCTGAAGGATTTGACCCGGACAGGGACCTTCAGAGAGTTGGTATTG	AGAAATTTAAATTTGCAATATCCAAGGGATTTGACCCTGACACGGATTTTGAGAAAGTTGGTATTG	69	1485	KAG6410751.1	4-hydroxy-3-methylbut-2-en-1-yl diphosphate reductase [EC:1.17.7.4]	K03527
686	KAG6410735.1	83.333	66	11	0	4	69	944	1009	3.01e-12	70.7	KAG6410735.1	77	55	55	0	83.33	1	1	AGAAATTCAAATTTGCAGTATCTGAAGGATTTGACCCGGACAGGGACCTTCAGAGAGTTGGTATTG	AGAAATTTAAATTTGCAATATCCAAGGGATTTGACCCTGACACGGATTTTGAGAAAGTTGGTATTG	69	1485	KAG6410735.1	4-hydroxy-3-methylbut-2-en-1-yl diphosphate reductase [EC:1.17.7.4]	K03527
694	KAG6409858.1	92.157	51	4	0	1	51	659	709	7.08e-14	75.2	KAG6409858.1	82	47	47	0	92.16	1	1	TGCAGAAATTGAAGAAGATGGATCCAATTGATGTTGAGACGGTATGCTTTC	TGCAGAAATTGAAGAAGATGGACCCAATCGATATTGAGACAGTATGCTTTC	69	1041	KAG6409858.1	Hypothetical protein	Uncharacterized protein
704	KAG6423253.1	89.552	67	7	0	1	67	768	834	3.22e-18	90.6	KAG6423253.1	99	60	60	0	89.55	1	1	TGCAGAAATTGGAATTGAGGAAGACAATATAAAGAAACACTCAACACCTGCATATAGAGCCCCTGAG	TGAAGAAATGGGAATTGAGGAAGACAATATAAGGAAGCACACAACACCTGCATATCGAGCCCCCGAG	69	1089	KAG6423253.1	AP2-associated kinase [EC:2.7.11.1]	K08853
705	KAG6411437.1	88.235	68	8	0	1	68	2378	2445	1.12e-17	87.8	KAG6411437.1	96	60	60	0	88.24	1	1	TGCAGAAATTGGGGAAAGATGCTGCTGGGAAAAGAGTGGAAATTCATCAAGCGTCCAGCAACTCATGG	TGCAGAAATTGGGGAAAGATGCTGCCGGGAAAAGAGTAGAAGTTCATCAGCCTTCGAGCAACTCCTGG	69	2577	KAG6411437.1	Hypothetical protein	Uncharacterized protein
705	KAG6414066.1	88.235	68	8	0	1	68	2429	2496	1.12e-17	87.8	KAG6414066.1	96	60	60	0	88.24	1	1	TGCAGAAATTGGGGAAAGATGCTGCTGGGAAAAGAGTGGAAATTCATCAAGCGTCCAGCAACTCATGG	TGCAGAAATTGGGGAAAGATGCTGCCGGGAAAAGAGTAGAAGTTCATCAGCCTTCGAGCAACTCCTGG	69	2628	KAG6414066.1	Hypothetical protein	Uncharacterized protein
705	KAG6421993.1	88.136	59	7	0	3	61	1342	1400	7.08e-14	76.1	KAG6421993.1	83	52	52	0	88.14	1	1	CAGAAATTGGGGAAAGATGCTGCTGGGAAAAGAGTGGAAATTCATCAAGCGTCCAGCAA	CAAAAATTGGGGAAAGATGCTGCTGGGAAAAGAGTTGAGATTCATCAGTCATCCAACAA	69	1545	KAG6421993.1	Hypothetical protein	Uncharacterized protein
713	KAG6420265.1	85.714	63	9	0	1	63	2619	2681	2.47e-13	74.3	KAG6420265.1	81	54	54	0	85.71	1	1	TGCAGAAATTTCTCCTCCACATTTAGGAACTTCCAGGAATGAAAATCAAGATACTGATGATGG	TGCTGAGATTTCTTCTCCACAGTTAGGAACTTCAAGAAATGAAAATGAAGATAATGACGATGG	69	5199	KAG6420265.1	translation initiation factor 4G	K03260
713	KAG6423293.1	85.714	63	9	0	1	63	2382	2444	2.47e-13	74.3	KAG6423293.1	81	54	54	0	85.71	1	1	TGCAGAAATTTCTCCTCCACATTTAGGAACTTCCAGGAATGAAAATCAAGATACTGATGATGG	TGCTGAGATTTCTTCTCCACAGTTAGGAACTTCAAGAAATGAAAATGAAGATAATGACGATGG	69	4908	KAG6423293.1	translation initiation factor 4G	K03260
714	KAG6431916.1	85.294	68	10	0	2	69	1719	1786	5.82e-15	78.8	KAG6431916.1	86	58	58	0	85.29	1	1	GCAGAAATTTGCTCTTTCTGCAACAGAGGTTGGTTCTCTGATCAATCTGGGACGAAAAGATTCATGTG	GCAGAAATTTGCTCTGTCCGCCACGGAAGTTGGGTCCCTGATCAATTTGGGTCCAAAAGATTCATGTG	69	2112	KAG6431916.1	Hypothetical protein	Uncharacterized protein
714	KAG6435214.1	85.294	68	10	0	2	69	288	355	5.82e-15	78.8	KAG6435214.1	86	58	58	0	85.29	1	1	GCAGAAATTTGCTCTTTCTGCAACAGAGGTTGGTTCTCTGATCAATCTGGGACGAAAAGATTCATGTG	GCAGAAATTTGCTCTGTCCGCCACGGAAGTTGGGTCCCTGATCAATTTGGGTCCAAAAGATTCATGTG	69	1002	KAG6435214.1	Hypothetical protein	Uncharacterized protein
735	KAG6425236.1	84.375	64	10	0	6	69	3030	2967	8.63e-13	71.6	KAG6425236.1	78	54	54	0	84.38	1	-1	AACAACTTCAAATGAGTTGGTGATGCTGCTAAGGAAACCTTCTGCTCTGCTTTTGGTGTTACTA	AACAAATTCAAATACATTAGTGATGCTGCTGAGAAAACCTAGTGCTCTGCTCTTGGTGTTACTA	69	3600	KAG6425236.1	Hypothetical protein	Uncharacterized protein
735	KAG6406350.1	82.812	64	11	0	6	69	3018	2955	3.67e-11	67.1	KAG6406350.1	73	53	53	0	82.81	1	-1	AACAACTTCAAATGAGTTGGTGATGCTGCTAAGGAAACCTTCTGCTCTGCTTTTGGTGTTACTA	AACTACTTCAAATACATTGGTGATACTGCTAAGAAAACCTTCTGCTCGGGTCTTGATATTACTA	69	3663	KAG6406350.1	Hypothetical protein	Uncharacterized protein
736	KAG6421331.1	95.833	48	2	0	3	50	1927	1974	5.82e-15	78.8	KAG6421331.1	86	46	46	0	95.83	1	1	CAGAACAAGAAGAAGAAGTCTCATCAGAAGAAAATAACTGGTTTCCAG	CAGAACAAAAAGAAGAAGTCTCATCAGAAAAAAATAACTGGTTTCCAG	69	2658	KAG6421331.1	WD repeat-containing protein 44	K20241
736	KAG6424368.1	91.667	48	4	0	3	50	1924	1971	3.01e-12	69.8	KAG6424368.1	76	44	44	0	91.67	1	1	CAGAACAAGAAGAAGAAGTCTCATCAGAAGAAAATAACTGGTTTCCAG	CAGAATAAAAAGAAGAAGTCTCATCACAAAAAAATAACTGGTTTCCAG	69	2655	KAG6424368.1	WD repeat-containing protein 44	K20241
738	KAG6397032.1	87.719	57	7	0	9	65	133	189	8.63e-13	72.5	KAG6397032.1	79	50	50	0	87.72	1	1	AAGACTCCCCCTAGTAGAATGTCCTCCTTTTTCTCTGGCACTCTAGAGAAATGTGCA	AAGACTCCCCCTAGTAAATTCTCCTCCATTTTCTCCGGCACTCAAGAAAAATGTGCA	69	558	KAG6397032.1	Hypothetical protein	Uncharacterized protein
741	KAG6427707.1	86.957	69	9	0	1	69	243	311	1.37e-16	85.1	KAG6427707.1	93	60	60	0	86.96	1	1	TGCAGAACAAGATGCACTTGCGTCTACTGAATGTGACGAACAAGAAGAGTCTAGGGGTCGCTTTGGGTC	TGCAGAACAAGATGCACTTGCGTCTACAGAATATGAGGAACAGGATGAACCAAGGAGTCGCTTTGGGTC	69	1668	KAG6427707.1	Hypothetical protein	Uncharacterized protein
741	KAG6437009.1	86.957	69	9	0	1	69	237	305	1.37e-16	85.1	KAG6437009.1	93	60	60	0	86.96	1	1	TGCAGAACAAGATGCACTTGCGTCTACTGAATGTGACGAACAAGAAGAGTCTAGGGGTCGCTTTGGGTC	TGCAGAACAAGATGCACTTGCATCTACAGAATATGAGGAACAGGGAGAGTCTGGGAGTCACTTTGGGTC	69	1803	KAG6437009.1	Hypothetical protein	Uncharacterized protein
741	KAG6433695.1	86.364	66	9	0	4	69	258	323	5.82e-15	79.7	KAG6433695.1	87	57	57	0	86.36	1	1	AGAACAAGATGCACTTGCGTCTACTGAATGTGACGAACAAGAAGAGTCTAGGGGTCGCTTTGGGTC	AGAACAAGATGCACTTGCATCTGCAGAATATGAGGAACAGGGAGAGTCTAGGAGTCACTTTGGGTC	69	1677	KAG6433695.1	Hypothetical protein	Uncharacterized protein
746	KAG6400676.1	86.765	68	9	0	2	69	498	565	4.77e-16	83.3	KAG6400676.1	91	59	59	0	86.76	1	1	GCAGAACAAGGCCCAGCTTGTCGTCATTGCACACGATGTTGATCCCATCGAGTTGGTTGTCTGGCTCC	GCAGAACAAGGCTCAGTTGGTTGTGATTGCTCATGATGTTGATCCCATTGAGTTGGTTGTGTGGCTCC	69	855	KAG6400676.1	large subunit ribosomal protein L7Ae	K02936
746	KAG6402870.1	83.824	68	11	0	2	69	417	484	2.47e-13	74.3	KAG6402870.1	81	57	57	0	83.82	1	1	GCAGAACAAGGCCCAGCTTGTCGTCATTGCACACGATGTTGATCCCATCGAGTTGGTTGTCTGGCTCC	GCAGAACAAGGCTCAGTTGGTTGTGATCGCTCATGATGTCGATCCCATTGAGTTGGTTGTTTGGCTCC	69	774	KAG6402870.1	large subunit ribosomal protein L7Ae	K02936
746	KAG6435082.1	83.824	68	11	0	2	69	420	487	2.47e-13	74.3	KAG6435082.1	81	57	57	0	83.82	1	1	GCAGAACAAGGCCCAGCTTGTCGTCATTGCACACGATGTTGATCCCATCGAGTTGGTTGTCTGGCTCC	GCAGAACAAGGCCCAGCTGGTTGTGATCGCCCATGATGTTGATCCTATTGAGCTTGTTGTGTGGCTCC	69	777	KAG6435082.1	large subunit ribosomal protein L7Ae	K02936
754	KAG6412447.1	82.09	67	12	0	1	67	611	677	1.05e-11	68	KAG6412447.1	74	55	55	0	82.09	1	1	TGCAGAACAATATAGAGACTCGGCATTCGGTTTCATTGTGCCTACTGTTTTGTCCCATTGGGATTCT	TGCAGAACAATATAGAGACGCGGCATTCTGTGTTGATGTGCCTCCTATTTTGTCCGGTTGGAATCCT	69	768	KAG6412447.1	Hypothetical protein	Uncharacterized protein
756	KAG6406683.1	88.406	69	8	0	1	69	722	654	3.22e-18	89.7	KAG6406683.1	98	61	61	0	88.41	1	-1	TGCAGAACAATCGGATCTTCCAGTTCAGATAGAGAAATATAATCATATGCTAGGAAGAGCGCATGAGAC	TGCAAAACCATCGGAGCTTCCAGTTCAGATAGGGAAATATGATCGTATGCAAGGAAAAGCGCATGAGAC	69	960	KAG6406683.1	Hypothetical protein	Uncharacterized protein
756	KAG6406668.1	86.957	69	9	0	1	69	722	654	1.37e-16	85.1	KAG6406668.1	93	60	60	0	86.96	1	-1	TGCAGAACAATCGGATCTTCCAGTTCAGATAGAGAAATATAATCATATGCTAGGAAGAGCGCATGAGAC	TGCAAAACCATCGGAGCTTCCAGTTCGGATAGGGAAATATGATCGTATGCAAGGAAAAGCGCATGAGAC	69	1125	KAG6406668.1	Hypothetical protein	Uncharacterized protein
756	KAG6382557.1	85.507	69	10	0	1	69	605	537	1.67e-15	80.6	KAG6382557.1	88	59	59	0	85.51	1	-1	TGCAGAACAATCGGATCTTCCAGTTCAGATAGAGAAATATAATCATATGCTAGGAAGAGCGCATGAGAC	TGCAAAACCATCGGAGCTTCCAGTTCGGATAGGGAAATGTGATCGTATGCAAGGAAAAGCGCATGAGAC	69	945	KAG6382557.1	inositol-1,3,4-trisphosphate 5/6-kinase / inositol-tetrakisphosphate 1-kinase [EC:2.7.1.159 2.7.1.134]	K00913
757	KAG6406683.1	88.406	69	8	0	1	69	722	654	3.22e-18	89.7	KAG6406683.1	98	61	61	0	88.41	1	-1	TGCAGAACAATCGGATCTTCCAGTTCAGATAGAGAAATATAATCATATGCTAGGAAGAGCGCATGAGAC	TGCAAAACCATCGGAGCTTCCAGTTCAGATAGGGAAATATGATCGTATGCAAGGAAAAGCGCATGAGAC	69	960	KAG6406683.1	Hypothetical protein	Uncharacterized protein
757	KAG6406668.1	86.957	69	9	0	1	69	722	654	1.37e-16	85.1	KAG6406668.1	93	60	60	0	86.96	1	-1	TGCAGAACAATCGGATCTTCCAGTTCAGATAGAGAAATATAATCATATGCTAGGAAGAGCGCATGAGAC	TGCAAAACCATCGGAGCTTCCAGTTCGGATAGGGAAATATGATCGTATGCAAGGAAAAGCGCATGAGAC	69	1125	KAG6406668.1	Hypothetical protein	Uncharacterized protein
757	KAG6382557.1	85.507	69	10	0	1	69	605	537	1.67e-15	80.6	KAG6382557.1	88	59	59	0	85.51	1	-1	TGCAGAACAATCGGATCTTCCAGTTCAGATAGAGAAATATAATCATATGCTAGGAAGAGCGCATGAGAC	TGCAAAACCATCGGAGCTTCCAGTTCGGATAGGGAAATGTGATCGTATGCAAGGAAAAGCGCATGAGAC	69	945	KAG6382557.1	inositol-1,3,4-trisphosphate 5/6-kinase / inositol-tetrakisphosphate 1-kinase [EC:2.7.1.159 2.7.1.134]	K00913
777	KAG6434882.1	88.406	69	8	0	1	69	641	573	3.22e-18	89.7	KAG6434882.1	98	61	61	0	88.41	1	-1	TGCAGAACACGTTTAGCCTCAAGCATTTTCCCTTTACTCACTAGCCACCGAGGAGACTCAGGCAAATAG	TGCAGCACTCGTTTGGCCTCGAGCATCTTCCCTTTACTCACGAGCCATCGAGGAGATTCAGGCAAATAG	69	2235	KAG6434882.1	Hypothetical protein	Uncharacterized protein
777	KAG6438229.1	88.406	69	8	0	1	69	611	543	3.22e-18	89.7	KAG6438229.1	98	61	61	0	88.41	1	-1	TGCAGAACACGTTTAGCCTCAAGCATTTTCCCTTTACTCACTAGCCACCGAGGAGACTCAGGCAAATAG	TGCAGCACTCGTTTGGCCTCGAGCATCTTCCCTTTACTCACGAGCCATCGAGGAGATTCAGGCAAATAG	69	2190	KAG6438229.1	Hypothetical protein	Uncharacterized protein
777	KAG6402386.1	86.957	69	9	0	1	69	257	189	1.37e-16	85.1	KAG6402386.1	93	60	60	0	86.96	1	-1	TGCAGAACACGTTTAGCCTCAAGCATTTTCCCTTTACTCACTAGCCACCGAGGAGACTCAGGCAAATAG	TGCAACACTCGTTTCGCCTCGAGCATCTTCCCTTTACTCACGAGCCACCGAGGAGATTCAGGCAAAAAG	69	927	KAG6402386.1	Hypothetical protein	Uncharacterized protein
778	KAG6396993.1	91.667	60	5	0	6	65	1410	1469	3.92e-17	86.9	KAG6396993.1	95	55	55	0	91.67	1	1	AACACTGAAAGTGAAATCGGGGCTTCATCCCTTGGCAGAACGCAAATCCGCTGATCCTCT	AACACTGAAAGTGAAATCGGGGCATCATCACTTGGAAGGACGCAAATTCGCTGATCCTCT	69	1566	KAG6396993.1	cell division cycle 20-like protein 1, cofactor of APC complex	K03364
779	KAG6410313.1	92.537	67	5	0	1	67	8	74	6.21e-21	99.6	KAG6410313.1	109	62	62	0	92.54	1	1	TGCAGAACACTGTGAAAGAAGCCCTAAATGCGCTCTACCATCATCCCGAGGACGCCGTGAGGATGCA	TGCAGAACACTGTGAAGGAAGCCCTAAACGCGCTCTACCATCATCCGGACGACGCCGTTAGGATGCA	69	3225	KAG6410313.1	transportin-3	K15436
779	KAG6412910.1	92.537	67	5	0	1	67	8	74	6.21e-21	99.6	KAG6412910.1	109	62	62	0	92.54	1	1	TGCAGAACACTGTGAAAGAAGCCCTAAATGCGCTCTACCATCATCCCGAGGACGCCGTGAGGATGCA	TGCAGAACACTGTGAAGGAAGCCCTAAACGCGCTCTACCATCATCCGGACGACGCCGTTAGGATGCA	69	2898	KAG6412910.1	transportin-3	K15436
779	KAG6389960.1	91.304	69	6	0	1	69	8	76	6.21e-21	98.7	KAG6389960.1	108	63	63	0	91.3	1	1	TGCAGAACACTGTGAAAGAAGCCCTAAATGCGCTCTACCATCATCCCGAGGACGCCGTGAGGATGCAGG	TGCAGAACACTGTCAAAGAAGCCCTAAACGCGCTCTACCACCATCCCGACGACGCCGTCCGGATGCAGG	69	2934	KAG6389960.1	transportin-3	K15436
781	KAG6411763.1	83.582	67	11	0	3	69	175	241	8.63e-13	72.5	KAG6411763.1	79	56	56	0	83.58	1	1	CAGAACACTTTGATTGAATTTGGAAGAATAATAAGTGCCCAAGAACAGGTAGTAGCTGGAAAAATGT	CAGAACTCTTTGATTGAATTCGGAAGAGTCGTAGATGCGAAAGAACAGGTAGTAGCTGGTACAATGT	69	465	KAG6411763.1	Hypothetical protein	Uncharacterized protein
795	KAG6417397.1	84.375	64	10	0	1	64	773	710	8.63e-13	71.6	KAG6417397.1	78	54	54	0	84.38	1	-1	TGCAGAACAGCAAAGCCGCTCCTTATATTCTGCAAGATTTGGCTGTCGAATACTTGTTCACTTC	TGCAGCACGGCAAAGCCTTTCCTAATATTTTGCAATATTTGGCTGTCAAATAATTGCTCACTTC	69	954	KAG6417397.1	peroxidase [EC:1.11.1.7]	K00430
797	KAG6410083.1	95.833	48	2	0	1	48	735	782	5.82e-15	78.8	KAG6410083.1	86	46	46	0	95.83	1	1	TGCAGAACAGGAGGCTCAGCACATTGTCAATGCTGCTAGAAATGGTGA	TGCAGAACAAGAGGCTCAGCACATTGTCAATGCTGCTAGAACTGGTGA	69	1071	KAG6410083.1	V-type H+-transporting ATPase subunit G	K02152
797	KAG6412738.1	95.455	44	2	0	1	44	162	205	8.63e-13	71.6	KAG6412738.1	78	42	42	0	95.45	1	1	TGCAGAACAGGAGGCTCAGCACATTGTCAATGCTGCTAGAAATG	TGCAGAACAAGAGGCTCAGCACATTGTCAATGCTGCTAGAACTG	69	450	KAG6412738.1	V-type H+-transporting ATPase subunit G	K02152
797	KAG6391514.1	93.182	44	3	0	1	44	42	85	3.67e-11	67.1	KAG6391514.1	73	41	41	0	93.18	1	1	TGCAGAACAGGAGGCTCAGCACATTGTCAATGCTGCTAGAAATG	TGCAGAACAAGAGGCTCAGCACATTGTCAATGCTGCTCGAACTG	69	330	KAG6391514.1	V-type H+-transporting ATPase subunit G	K02152
798	KAG6433582.1	86.567	67	9	0	1	67	1214	1280	1.67e-15	81.5	KAG6433582.1	89	58	58	0	86.57	1	1	TGCAGAACAGGAGGCTTATGGGCCTTCAGCTTCTTGACATCAAGAGGAACAGCCACCACCGTACACT	TGCAGAACAGGCGGCTCATGGGTCTTCAGCTTCTCGATGTCAAGAGGAATAGCCACCACCGCACGCT	69	1824	KAG6433582.1	Hypothetical protein	Uncharacterized protein
799	KAG6433582.1	86.567	67	9	0	1	67	1214	1280	1.67e-15	81.5	KAG6433582.1	89	58	58	0	86.57	1	1	TGCAGAACAGGAGGCTTATGGGCCTTCAGCTTCTTGACATCAAGAGGAACAGCCACCACCGTACACT	TGCAGAACAGGCGGCTCATGGGTCTTCAGCTTCTCGATGTCAAGAGGAATAGCCACCACCGCACGCT	69	1824	KAG6433582.1	Hypothetical protein	Uncharacterized protein
800	KAG6383952.1	89.855	69	7	0	1	69	2126	2194	2.64e-19	94.2	KAG6383952.1	103	62	62	0	89.86	1	1	TGCAGAACAGGGCTCAACTTTTGAAGGTTGCTGAGACCGAAAAACAGAGTTTGCTAGATGATGTTCTAA	TGCAGAATAGGGTTCAACTTTTGAAGGTTTCTGAGACCCAAAATCAGAGTTTGCAAGATGAGGTTCTAA	69	5328	KAG6383952.1	Hypothetical protein	Uncharacterized protein
800	KAG6402996.1	89.855	69	7	0	1	69	1508	1576	2.64e-19	94.2	KAG6402996.1	103	62	62	0	89.86	1	1	TGCAGAACAGGGCTCAACTTTTGAAGGTTGCTGAGACCGAAAAACAGAGTTTGCTAGATGATGTTCTAA	TGCAAAATAGGGCTCAACTTTTGAAGGTTTCTGAGACCCAAAATCAGAGTTTGCAAGATGAGGTTCTAA	69	5271	KAG6402996.1	Hypothetical protein	Uncharacterized protein
800	KAG6400815.1	89.552	67	7	0	3	69	1633	1699	3.22e-18	90.6	KAG6400815.1	99	60	60	0	89.55	1	1	CAGAACAGGGCTCAACTTTTGAAGGTTGCTGAGACCGAAAAACAGAGTTTGCTAGATGATGTTCTAA	CAGAATAGGGCTCAACTTTTGAAGGTTTCTGAGACTCAAAATCAGAGTTTGCAAGATGAAGTTCTAA	69	4923	KAG6400815.1	Hypothetical protein	Uncharacterized protein
814	KAG6400739.1	94.03	67	4	0	3	69	901	967	1.46e-22	104	KAG6400739.1	114	63	63	0	94.03	1	1	CAGAACATCCTTCCATCTAATACCAACTTTGTAGAGGCTTATGCAAATGGCACTAGTGAGGAACAGG	CAGAACATCCTTCCATCTAATACAAATTTCGTAGAGGCTTATGCAAATGGCACTAGTGAGGAGCAGG	69	3000	KAG6400739.1	Hypothetical protein	Uncharacterized protein
814	KAG6400725.1	94.03	67	4	0	3	69	802	868	1.46e-22	104	KAG6400725.1	114	63	63	0	94.03	1	1	CAGAACATCCTTCCATCTAATACCAACTTTGTAGAGGCTTATGCAAATGGCACTAGTGAGGAACAGG	CAGAACATCCTTCCATCTAATACAAATTTCGTAGAGGCTTATGCAAATGGCACTAGTGAGGAGCAGG	69	3159	KAG6400725.1	exportin-1	K14290
814	KAG6402921.1	94.03	67	4	0	3	69	850	916	1.46e-22	104	KAG6402921.1	114	63	63	0	94.03	1	1	CAGAACATCCTTCCATCTAATACCAACTTTGTAGAGGCTTATGCAAATGGCACTAGTGAGGAACAGG	CAGAACATCCTTCCATCTAATACAAATTTCGTAGAGGCTTATGCAAATGGCACTAGTGAGGAGCAGG	69	3162	KAG6402921.1	exportin-1	K14290
815	KAG6400739.1	91.045	67	6	0	3	69	901	967	7.56e-20	95.1	KAG6400739.1	104	61	61	0	91.04	1	1	CAGAACATCCTTCCATCTACTACTAACTTTGTAGAGGCTTATGCAATTGGAACTAGTGAGGAGCAGG	CAGAACATCCTTCCATCTAATACAAATTTCGTAGAGGCTTATGCAAATGGCACTAGTGAGGAGCAGG	69	3000	KAG6400739.1	Hypothetical protein	Uncharacterized protein
815	KAG6400725.1	91.045	67	6	0	3	69	802	868	7.56e-20	95.1	KAG6400725.1	104	61	61	0	91.04	1	1	CAGAACATCCTTCCATCTACTACTAACTTTGTAGAGGCTTATGCAATTGGAACTAGTGAGGAGCAGG	CAGAACATCCTTCCATCTAATACAAATTTCGTAGAGGCTTATGCAAATGGCACTAGTGAGGAGCAGG	69	3159	KAG6400725.1	exportin-1	K14290
815	KAG6402921.1	91.045	67	6	0	3	69	850	916	7.56e-20	95.1	KAG6402921.1	104	61	61	0	91.04	1	1	CAGAACATCCTTCCATCTACTACTAACTTTGTAGAGGCTTATGCAATTGGAACTAGTGAGGAGCAGG	CAGAACATCCTTCCATCTAATACAAATTTCGTAGAGGCTTATGCAAATGGCACTAGTGAGGAGCAGG	69	3162	KAG6402921.1	exportin-1	K14290
820	KAG6407967.1	92.647	68	5	0	2	69	1291	1358	1.78e-21	101	KAG6407967.1	111	63	63	0	92.65	1	1	GCAGAACATGAAAGGCAACAAAAAGCATTTGAGAACGAGATTGAAAGGATAACTTTGGAAGCACAGAA	GCTGAACATGAAAGGCAACAAAAAGCATTTGATGACGAGATTGAAAGGATAACTTTGGATGGACAGAA	69	2754	KAG6407967.1	kinesin family member 5	K10396
823	KAG6434939.1	83.333	66	11	0	3	68	535	600	3.01e-12	70.7	KAG6434939.1	77	55	55	0	83.33	1	1	CAGAACATGGAGGTAAGGTTGCGAGGTACGGAGAAGAAGCAGCAGCAGATGATGAGATTCTTGGCG	CAGCAGATGGAGCTGAGGCTGCAGAGCACGGAGAAGAGGCAGCAGCAGATGATGAGCTTCTTGGCG	69	1011	KAG6434939.1	heat shock transcription factor, other eukaryote	K09419
823	KAG6426906.1	85.965	57	8	0	9	65	487	543	1.05e-11	68	KAG6426906.1	74	49	49	0	85.96	1	1	ATGGAGGTAAGGTTGCGAGGTACGGAGAAGAAGCAGCAGCAGATGATGAGATTCTTG	ATGGAGCAGAGATTGCAAGGAACAGAGAAGAAGCAGCAGCAGATGATGAGATTCCTG	69	915	KAG6426906.1	heat shock transcription factor, other eukaryote	K09419
823	KAG6429132.1	85.965	57	8	0	9	65	490	546	1.05e-11	68	KAG6429132.1	74	49	49	0	85.96	1	1	ATGGAGGTAAGGTTGCGAGGTACGGAGAAGAAGCAGCAGCAGATGATGAGATTCTTG	ATGGAGCAGAGATTGGAAGGAACAGAGAAGAAGCAGCAGCAGATGATGAGATTCTTG	69	915	KAG6429132.1	heat shock transcription factor, other eukaryote	K09419
829	KAG6427077.1	88.406	69	8	0	1	69	1564	1496	3.22e-18	89.7	KAG6427077.1	98	61	61	0	88.41	1	-1	TGCAGAACATTACAAGTACTACATTCCCGAAATGTTTCCTCCACCGAATCAAGTTGCCTATTTCATAAT	TGCAGAACATTACAAGCACCACATTCCCAAAATGCTTCCTCCAATGAATCAAGTTCCCGATTTCATAAT	69	2292	KAG6427077.1	Hypothetical protein	Uncharacterized protein
829	KAG6430080.1	85.507	69	10	0	1	69	1663	1595	1.67e-15	80.6	KAG6430080.1	88	59	59	0	85.51	1	-1	TGCAGAACATTACAAGTACTACATTCCCGAAATGTTTCCTCCACCGAATCAAGTTGCCTATTTCATAAT	TGCAGAACATCACGAGCACTACATTCCCAAAATACTTCCTCCAATGAATCAAGTTCCCGATTTCATAAT	69	2391	KAG6430080.1	Hypothetical protein	Uncharacterized protein
834	KAG6398364.1	83.333	66	11	0	4	69	983	918	3.01e-12	70.7	KAG6398364.1	77	55	55	0	83.33	1	-1	AGAACATTTTCACGAATACTAGTATTTTTTAGGAGGCACCTAAGAACATCTTCCAACCCCTCATAC	AGAACATTTTCACGTGTGTTTGTATTTTTCAGGAGGCACATAAGAACTTCTGCCAGCCCGTCATAC	69	3135	KAG6398364.1	ubiquitin conjugation factor E4 B [EC:2.3.2.27]	K10597
834	KAG6396092.1	81.818	66	12	0	4	69	983	918	3.67e-11	66.2	KAG6396092.1	72	54	54	0	81.82	1	-1	AGAACATTTTCACGAATACTAGTATTTTTTAGGAGGCACCTAAGAACATCTTCCAACCCCTCATAC	AGAACATTTTCACGTGTGTTTGTATTTTTCAGGAGGCACATAAGAACTTCAGCCAGCCCGTCATAC	69	3228	KAG6396092.1	ubiquitin conjugation factor E4 B [EC:2.3.2.27]	K10597
841	KAG6392047.1	95.652	69	3	0	1	69	1917	1849	9.84e-25	112	KAG6392047.1	123	66	66	0	95.65	1	-1	TGCAGAACCAATTGCAAATCCCTTAGTCGTGGCTTTTGTAGTATTCCCAACCGCATCAAGCACATCCGT	TGCAGAACCAATTGCAAATCCCTTGGTCGTGGCCTTTGTAGTATTCCCAACCGCATCAAGCACATCAGT	69	2589	KAG6392047.1	H+-translocating diphosphatase [EC:7.1.3.1]	K23025
841	KAG6393767.1	94.203	69	4	0	1	69	1755	1687	1.2e-23	107	KAG6393767.1	118	65	65	0	94.2	1	-1	TGCAGAACCAATTGCAAATCCCTTAGTCGTGGCTTTTGTAGTATTCCCAACCGCATCAAGCACATCCGT	TGCAGAACCAATTGCAAATCCCTTGGTTGTGGCCTTTGTAGTATTCCCAACCGCATCAAGCACATCAGT	69	2460	KAG6393767.1	H+-translocating diphosphatase [EC:7.1.3.1]	K23025
842	KAG6390656.1	84.127	63	9	1	1	62	753	691	3.67e-11	66.2	KAG6390656.1	72	53	53	1	84.13	1	-1	TGCAGAACCAGAACTCGGGTAGTTCCTCGGGTCTCCACCCGGAATGATCGGGTAA-TTCTTAC	TGCAGAACCCGAACTAGGATAGTTCCTGGGATCTCCACCCGGGATGGTAGGGTAAGTTCTGAC	69	1605	KAG6390656.1	Hypothetical protein	Uncharacterized protein
842	KAG6390654.1	84.127	63	9	1	1	62	753	691	3.67e-11	66.2	KAG6390654.1	72	53	53	1	84.13	1	-1	TGCAGAACCAGAACTCGGGTAGTTCCTCGGGTCTCCACCCGGAATGATCGGGTAA-TTCTTAC	TGCAGAACCCGAACTAGGATAGTTCCTGGGATCTCCACCCGGGATGGTAGGGTAAGTTCTGAC	69	1605	KAG6390654.1	Hypothetical protein	Uncharacterized protein
842	KAG6390655.1	84.127	63	9	1	1	62	753	691	3.67e-11	66.2	KAG6390655.1	72	53	53	1	84.13	1	-1	TGCAGAACCAGAACTCGGGTAGTTCCTCGGGTCTCCACCCGGAATGATCGGGTAA-TTCTTAC	TGCAGAACCCGAACTAGGATAGTTCCTGGGATCTCCACCCGGGATGGTAGGGTAAGTTCTGAC	69	1605	KAG6390655.1	Hypothetical protein	Uncharacterized protein
843	KAG6396855.1	90.323	62	6	0	8	69	696	757	3.92e-17	86	KAG6396855.1	94	56	56	0	90.32	1	1	CCAGACCCCTGCCACTCCCACAGAGAAGACAACTGGCGGCAAAACTTTGTTTGTTGGGAATC	CCAGACCCCGACCACTCCCACAGAGCAGACAAGTGGCGGAAAAACTTTGTATGTTGGGAATC	69	2814	KAG6396855.1	nucleolin	K11294
843	KAG6399135.1	88.71	62	7	0	8	69	687	748	1.67e-15	81.5	KAG6399135.1	89	55	55	0	88.71	1	1	CCAGACCCCTGCCACTCCCACAGAGAAGACAACTGGCGGCAAAACTTTGTTTGTTGGGAATC	CCACACCCCTACCACTCCCACAGACCAGACAAGTGGCGGAAAAACTTTGTATGTTGGGAATC	69	1023	KAG6399135.1	Hypothetical protein	Uncharacterized protein
844	KAG6432504.1	91.304	69	6	0	1	69	227	295	6.21e-21	98.7	KAG6432504.1	108	63	63	0	91.3	1	1	TGCAGAACCAGCGCTGGATCGCTGTCAAGAAATTTACCAAAATGGCGTGGCCTGATCCTAAACAATTTG	TGCAGAACCAGCGCTGGATCGCAGTGAAGAAGTTCACGAAAATGGCGTGGCCTGATCCTAAACAGTTTG	69	1266	KAG6432504.1	Hypothetical protein	Uncharacterized protein
844	KAG6390806.1	92.308	65	5	0	3	67	166	230	7.56e-20	96	KAG6390806.1	105	60	60	0	92.31	1	1	CAGAACCAGCGCTGGATCGCTGTCAAGAAATTTACCAAAATGGCGTGGCCTGATCCTAAACAATT	CAGAGCCAGCGCTGGATCGCTGTGAAGAAGTTTACCAAAATGGCGTGGCCTGATCCTAAGCAGTT	69	1575	KAG6390806.1	BR-signaling kinase [EC:2.7.11.1]	K14500
844	KAG6435821.1	89.855	69	7	0	1	69	227	295	2.64e-19	94.2	KAG6435821.1	103	62	62	0	89.86	1	1	TGCAGAACCAGCGCTGGATCGCTGTCAAGAAATTTACCAAAATGGCGTGGCCTGATCCTAAACAATTTG	TGCACAACCAGCGCTGGATCGCAGTGAAGAAGTTCACGAAAATGGCGTGGCCTGATCCTAAACAGTTTG	69	1446	KAG6435821.1	BR-signaling kinase [EC:2.7.11.1]	K14500
846	KAG6432655.1	89.855	69	7	0	1	69	812	880	2.64e-19	94.2	KAG6432655.1	103	62	62	0	89.86	1	1	TGCAGAACCAGTTGATGCTCTTGAAGCAAAAGCATTGGTTCCTTATGGACACATTGCGACAGTTAGAGG	TGCAGAATCAGCTGATGCTCTTGAAACAGAAGCATTGGTTTCTCATGGACACATTGCGGCAGTTAGAGG	69	2439	KAG6432655.1	oxysterol-binding protein 1	K20456
846	KAG6390366.1	89.706	68	7	0	1	68	842	909	9.22e-19	92.4	KAG6390366.1	101	61	61	0	89.71	1	1	TGCAGAACCAGTTGATGCTCTTGAAGCAAAAGCATTGGTTCCTTATGGACACATTGCGACAGTTAGAG	TGCAGAATCAGCTGATGCTCTTGAAACAGAAGCATTGGTTTCTCATGGACACATTGCGGCAGTTAGAG	69	2427	KAG6390366.1	oxysterol-binding protein 1	K20456
846	KAG6435974.1	89.706	68	7	0	1	68	812	879	9.22e-19	92.4	KAG6435974.1	101	61	61	0	89.71	1	1	TGCAGAACCAGTTGATGCTCTTGAAGCAAAAGCATTGGTTCCTTATGGACACATTGCGACAGTTAGAG	TGCAGAATCAGCTGATGCTCTTGAAACAGAAGCATTGGTTTCTCATGGACACATTGCGGCAGTTAGAG	69	2397	KAG6435974.1	oxysterol-binding protein 1	K20456
850	KAG6389923.1	89.855	69	7	0	1	69	117	49	2.64e-19	94.2	KAG6389923.1	103	62	62	0	89.86	1	-1	TGCAGAACCATATCTCACCGCGGGCTTCTCCATCTTCTCATTCCTCAACTCCCTATTTATGAGTGCAGC	TGCAGAGCCATATCTCACCGCGGGCCTCTCCATTTTCTCATTCTTCAGCTCCCTATTGATCAGTGCAGC	69	1182	KAG6389923.1	Hypothetical protein	Uncharacterized protein
850	KAG6391675.1	89.855	69	7	0	1	69	117	49	2.64e-19	94.2	KAG6391675.1	103	62	62	0	89.86	1	-1	TGCAGAACCATATCTCACCGCGGGCTTCTCCATCTTCTCATTCCTCAACTCCCTATTTATGAGTGCAGC	TGCAGAGCCATATCTCACCGTGGGCCTCTCCATTTTCTCATTCCTCAGCTCCCTATTGATCAGTGCAGC	69	1374	KAG6391675.1	Hypothetical protein	Uncharacterized protein
850	KAG6412950.1	86.957	69	9	0	1	69	117	49	1.37e-16	85.1	KAG6412950.1	93	60	60	0	86.96	1	-1	TGCAGAACCATATCTCACCGCGGGCTTCTCCATCTTCTCATTCCTCAACTCCCTATTTATGAGTGCAGC	TGCATAGCCATATCTCACAGCGGGCTTCTCCGTTTTCCCATTCCTCAGCTCCCTATTGATCAGTGCAGC	69	1368	KAG6412950.1	Hypothetical protein	Uncharacterized protein
855	KAG6424233.1	82.353	68	12	0	1	68	551	484	3.01e-12	69.8	KAG6424233.1	76	56	56	0	82.35	1	-1	TGCAGAACCATTAGGGCGAACAACATGATTGCTGCAAGAGCTGTTACGACATAGAAGCAAATTCCTCT	TGTAGAACCATTGGCACGAATAAAGTGATGGCAGCAAGAGATGTTACAATATAGAAGCAAATTCCTCT	69	1185	KAG6424233.1	1-acyl-sn-glycerol-3-phosphate acyltransferase [EC:2.3.1.51]	K00655
855	KAG6410495.1	81.159	69	13	0	1	69	557	489	3.67e-11	67.1	KAG6410495.1	73	56	56	0	81.16	1	-1	TGCAGAACCATTAGGGCGAACAACATGATTGCTGCAAGAGCTGTTACGACATAGAAGCAAATTCCTCTA	TGCAGAACCATTGGCACGAATAAAGTGATGGCAGCGATAGATGTTACGATATAGAAGCAAATCCCTCTA	69	1191	KAG6410495.1	1-acyl-sn-glycerol-3-phosphate acyltransferase [EC:2.3.1.51]	K00655
856	KAG6437488.1	83.824	68	11	0	1	68	2239	2306	2.47e-13	74.3	KAG6437488.1	81	57	57	0	83.82	1	1	TGCAGAACCCACCATGATGTGGATGTAGGCAATGTTGTAGCTGATCATCTCTTGAGAATTGAAACCAC	TGCAGAGCCCACCATGATGTGGATACAGGTCATATTGTAGCTGAACGTCTTTTAAGAACTGAAACCAC	69	2562	KAG6437488.1	Hypothetical protein	Uncharacterized protein
856	KAG6434152.1	82.353	68	12	0	1	68	2278	2345	3.01e-12	69.8	KAG6434152.1	76	56	56	0	82.35	1	1	TGCAGAACCCACCATGATGTGGATGTAGGCAATGTTGTAGCTGATCATCTCTTGAGAATTGAAACCAC	TGCAGAGCCCACCATGATGTGGATACAGGTCATATTGTAGCTGAACGTCTTTCAAGAACTGAAACCAC	69	2601	KAG6434152.1	Hypothetical protein	Uncharacterized protein
862	KAG6397074.1	94.203	69	4	0	1	69	927	995	1.2e-23	107	KAG6397074.1	118	65	65	0	94.2	1	1	TGCAGAACCCGAGATTCAGTATGTTGCATTGCGAAACATAAACCTTATTGTACAAAAGCGTCCCACTAT	TGCTGAACCAGAGATTCAGTATGTTGCATTGCGAAATATAAACCTTATTGTGCAAAAGCGTCCCACTAT	69	2733	KAG6397074.1	AP-1 complex subunit beta-1	K12392
862	KAG6399342.1	92.754	69	5	0	1	69	879	947	5.1e-22	103	KAG6399342.1	113	64	64	0	92.75	1	1	TGCAGAACCCGAGATTCAGTATGTTGCATTGCGAAACATAAACCTTATTGTACAAAAGCGTCCCACTAT	TGCTGAACCAGAGATTCAGTATGTTGCATTGCGTAATATAAACCTTATTGTGCAAAAGCGTCCCACTAT	69	2685	KAG6399342.1	AP-1 complex subunit beta-1	K12392
864	KAG6398415.1	89.855	69	7	0	1	69	7247	7179	2.64e-19	94.2	KAG6398415.1	103	62	62	0	89.86	1	-1	TGCAGAACCCGGCTGGCAGCCGACTGCAACAAAGGCTCCCTATCACTCTCAAATATTGCTTCCAGCACT	TGCAGAACCCGGCTGGCAGCAGTCTGTAACAAAGGCTCCCTATCGCTCTCGAATATTGTTTCCAGTACT	69	15309	KAG6398415.1	E3 ubiquitin-protein ligase UBR4 [EC:2.3.2.27]	K10691
864	KAG6408148.1	86.957	69	9	0	1	69	7163	7095	1.37e-16	85.1	KAG6408148.1	93	60	60	0	86.96	1	-1	TGCAGAACCCGGCTGGCAGCCGACTGCAACAAAGGCTCCCTATCACTCTCAAATATTGCTTCCAGCACT	TGCAGAACCCGGCTGGCAGCAGTGTGTAATAAAGGCTCCCTATCGCTTTCAAATATTGTTTCCAGTACT	69	15174	KAG6408148.1	E3 ubiquitin-protein ligase UBR4 [EC:2.3.2.27]	K10691
874	KAG6416513.1	88.235	51	6	0	12	62	96	46	3.67e-11	66.2	KAG6416513.1	72	45	45	0	88.24	1	-1	GATGGCTTCTTGGCATGACACTGCATTTGCATGGCTCGCCGCCGCCGCCAC	GATGGCTTGTGGGCAGGACACTGCATTTGCATGGCTTGCCGCCGATGCCAC	69	348	KAG6416513.1	Hypothetical protein	Uncharacterized protein
879	KAG6403905.1	93.878	49	3	0	1	49	1265	1217	7.08e-14	76.1	KAG6403905.1	83	46	46	0	93.88	1	-1	TGCAGAACCGGAGGAAAGTCGATGAACAAGACACCCTTCTTGGCATCCT	TGTAGAACTGGAGGAAAGTCAATGAACAAGACACCCTTCTTGGCATCCT	69	3492	KAG6403905.1	ubiquitin carboxyl-terminal hydrolase 7 [EC:3.4.19.12]	K11838
879	KAG6401642.1	91.837	49	4	0	1	49	1400	1352	8.63e-13	71.6	KAG6401642.1	78	45	45	0	91.84	1	-1	TGCAGAACCGGAGGAAAGTCGATGAACAAGACACCCTTCTTGGCATCCT	TGTAGAACTGGAGGAAAGTCAATGAACATGACACCCTTCTTGGCATCCT	69	3888	KAG6401642.1	ubiquitin carboxyl-terminal hydrolase 7 [EC:3.4.19.12]	K11838
879	KAG6427557.1	89.796	49	5	0	1	49	1193	1145	3.67e-11	67.1	KAG6427557.1	73	44	44	0	89.8	1	-1	TGCAGAACCGGAGGAAAGTCGATGAACAAGACACCCTTCTTGGCATCCT	TGGAGAACTGGAGGGAAGTCAATGAACAAGACACCCTTCTTTGCATCCT	69	1257	KAG6427557.1	Hypothetical protein	Uncharacterized protein
884	KAG6435130.1	91.304	69	6	0	1	69	867	935	6.21e-21	98.7	KAG6435130.1	108	63	63	0	91.3	1	1	TGCAGAACCTACTATGCGTTTCCTAGCTATGCTTGCCGGTCCATTTTACCCTATCCTTCAAATTGCAAG	TGCACAACCTACTATGCGTTTTCTGGCTATGCTTGCCGGTCCATTTTATCCTATCCTTCGGATTGCAAG	69	6786	KAG6435130.1	Hypothetical protein	Uncharacterized protein
888	KAG6422716.1	92.754	69	5	0	1	69	1367	1435	5.1e-22	103	KAG6422716.1	113	64	64	0	92.75	1	1	TGCAGAACCTGATGAACGAAGCAGCCATTCTTGCAGCACGACGCGACCTCAAGGAGATAAGCAAGGACG	TGCAGAATTTAATGAACGAAGCAGCCATTCTTGCAGCACGCCGTGACCTCAAGGAGATAAGCAAGGACG	69	2106	KAG6422716.1	cell division protease FtsH [EC:3.4.24.-]	K03798
904	KAG6388058.1	90.625	64	6	0	6	69	453	516	3.22e-18	89.7	KAG6388058.1	98	58	58	0	90.62	1	1	AACGCATCTAACAGCAAATCATGAGGCGTTTCGAAATATGAAGCTTGATTTAGTGATAAATGAT	AACACATCTCACAGCCAATCACGAGGCTTTTCGAAATATGAAGCTTGATTTAGTGATTAATGAT	69	987	KAG6388058.1	thermospermine synthase [EC:2.5.1.79]	K18787
904	KAG6409531.1	86.957	69	9	0	1	69	439	507	1.37e-16	85.1	KAG6409531.1	93	60	60	0	86.96	1	1	TGCAGAACGCATCTAACAGCAAATCATGAGGCGTTTCGAAATATGAAGCTTGATTTAGTGATAAATGAT	TGCAAAACCCATCTCACAGCCAATCACGAGGCTTTTCTAAATATGAAGCTTGATTTGGTGATCAATGAT	69	1020	KAG6409531.1	thermospermine synthase [EC:2.5.1.79]	K18787
906	KAG6387391.1	84.746	59	9	0	1	59	1884	1942	3.67e-11	67.1	KAG6387391.1	73	50	50	0	84.75	1	1	TGCAGAACGCTTCCTAAAAGTCGTGGTCGATATCCCATTTGCCTTCAAGAGGCTAGAAT	TGCTGAACGCTTTCTAAAGGTCATGGTTGATATTCCATTCGCGTTTAAGAGGCTAGAAT	69	3075	KAG6387391.1	Hypothetical protein	Uncharacterized protein
908	KAG6384485.1	88.333	60	7	0	5	64	489	548	2.03e-14	77.9	KAG6384485.1	85	53	53	0	88.33	1	1	GAACGGAGCTTCATATTGCACCTCAGAACTCACAGTACTGAAAAACAGTGAAGTACATAC	GAATGGAGCATCATATTGTACCTCAGAACTTACAGTATTGAAAAACAGTGAAATACACAC	69	720	KAG6384485.1	Hypothetical protein	Uncharacterized protein
908	KAG6418244.1	88.333	60	7	0	5	64	597	656	2.03e-14	77.9	KAG6418244.1	85	53	53	0	88.33	1	1	GAACGGAGCTTCATATTGCACCTCAGAACTCACAGTACTGAAAAACAGTGAAGTACATAC	GAATGGAGCATCATATTGTACCTCAGAACTTACAGTATTGAAAAACAGTGAAATACACAC	69	828	KAG6418244.1	Hypothetical protein	Uncharacterized protein
908	KAG6418242.1	88.333	60	7	0	5	64	711	770	2.03e-14	77.9	KAG6418242.1	85	53	53	0	88.33	1	1	GAACGGAGCTTCATATTGCACCTCAGAACTCACAGTACTGAAAAACAGTGAAGTACATAC	GAATGGAGCATCATATTGTACCTCAGAACTTACAGTATTGAAAAACAGTGAAATACACAC	69	858	KAG6418242.1	Hypothetical protein	Uncharacterized protein
910	KAG6407770.1	82.812	64	11	0	1	64	581	644	3.67e-11	67.1	KAG6407770.1	73	53	53	0	82.81	1	1	TGCAGAACGGCTCCGACGTGCGAGGGGTGGCGTTGGAGGGCGAGAAAGGGAGGAAGGTCGACTT	TGCAGAACGGCTCGGATGTGCGTGGAGTGGCGGTGGAAGGCGAGAAGGGGAGGCCGGTGAACTT	69	2211	KAG6407770.1	Hypothetical protein	Uncharacterized protein
911	KAG6407770.1	82.812	64	11	0	1	64	581	644	3.67e-11	67.1	KAG6407770.1	73	53	53	0	82.81	1	1	TGCAGAACGGCTCCGACGTGCGAGGGGTGGCGTTGGAGGGCGAGAAAGGGAGGAAGGTCGACTT	TGCAGAACGGCTCGGATGTGCGTGGAGTGGCGGTGGAAGGCGAGAAGGGGAGGCCGGTGAACTT	69	2211	KAG6407770.1	Hypothetical protein	Uncharacterized protein
935	KAG6406271.1	85.294	68	10	0	2	69	1292	1225	5.82e-15	78.8	KAG6406271.1	86	58	58	0	85.29	1	-1	GCAGAACTCCACCGGGCTACAAAGTTGAATGAATAAGTAACCATCCATGATCCCAACCAGTTCACCAC	GCTGAGCTCCACTCTGCTAGAAAGTTGAATGAATATGTAATGATCCATGAACCCAACCAGTTCACCAC	69	1395	KAG6406271.1	MFS transporter, SP family, ERD6-like sugar transporter	K03444
935	KAG6406269.1	84.615	65	10	0	2	66	1283	1219	2.47e-13	73.4	KAG6406269.1	80	55	55	0	84.62	1	-1	GCAGAACTCCACCGGGCTACAAAGTTGAATGAATAAGTAACCATCCATGATCCCAACCAGTTCAC	GCAGAGCTCCACTGTGCTACGAAGTTGAATGAATATGTAACAATCCAAGAACCGAACCAGTTAAC	69	1401	KAG6406269.1	MFS transporter, SP family, ERD6-like sugar transporter	K03444
936	KAG6391659.1	89.552	67	7	0	1	67	1007	1073	3.22e-18	90.6	KAG6391659.1	99	60	60	0	89.55	1	1	TGCAGAACTCCGTGCTGAAGGCATGGCAGGGTCGTCCGGAGAACATAGAGGCTGCACAGAAGGCACT	TGCAGAACTCCGTGCTGAAGGCGTGGCAGGGTCGTCCAGAGAACGCAGAAGCTGCGCAGAAAGCACT	69	1182	KAG6391659.1	fructose-bisphosphate aldolase, class I [EC:4.1.2.13]	K01623
936	KAG6389906.1	88.06	67	8	0	1	67	1007	1073	3.92e-17	86	KAG6389906.1	94	59	59	0	88.06	1	1	TGCAGAACTCCGTGCTGAAGGCATGGCAGGGTCGTCCGGAGAACATAGAGGCTGCACAGAAGGCACT	TGCAGAACTCCGTGCTGAAGGCGTGGCAAGGTCGTCCTGAGAATGTAGAAGCTGCGCAGAAAGCACT	69	1182	KAG6389906.1	fructose-bisphosphate aldolase, class I [EC:4.1.2.13]	K01623
940	KAG6391043.1	86.567	67	9	0	1	67	6736	6670	1.67e-15	81.5	KAG6391043.1	89	58	58	0	86.57	1	-1	TGCAGAACTCTGATGCGTCTTCCTTGCAGACGAATGATCCAGCACACAAGCAATGTTCGGCTAAATG	TGCAGAACTCAGCTGAATCTTCCCTGCAAACAAATGATCCAGCACACGAGCAATGCTCGGCTAAATG	69	6831	KAG6391043.1	DNA polymerase epsilon subunit 1 [EC:2.7.7.7]	K02324
940	KAG6415169.1	83.582	67	11	0	1	67	6475	6409	8.63e-13	72.5	KAG6415169.1	79	56	56	0	83.58	1	-1	TGCAGAACTCTGATGCGTCTTCCTTGCAGACGAATGATCCAGCACACAAGCAATGTTCGGCTAAATG	TGCAGAATTCAGCTGAATCTTCCTTGCAAGCAAATGATCCAGCGCACGAGCAATGATCGGCTAAATG	69	6570	KAG6415169.1	DNA polymerase epsilon subunit 1 [EC:2.7.7.7]	K02324
940	KAG6417684.1	83.582	67	11	0	1	67	8893	8827	8.63e-13	72.5	KAG6417684.1	79	56	56	0	83.58	1	-1	TGCAGAACTCTGATGCGTCTTCCTTGCAGACGAATGATCCAGCACACAAGCAATGTTCGGCTAAATG	TGCAGAATTCAGCTGAATCTTCCTTGCAAACAAATGATCCCGCGCACGAGCAATGCTCGGCTAAATG	69	9297	KAG6417684.1	DNA polymerase epsilon subunit 1 [EC:2.7.7.7]	K02324
943	KAG6388311.1	87.5	64	8	0	1	64	8996	8933	1.67e-15	80.6	KAG6388311.1	88	56	56	0	87.5	1	-1	TGCAGAACTGACTTCAAAAATAGAATTGGTTTAGTAGCATGCTCCATGAACTTGTTATATATCC	TGCAAAATTGACTTCAGATATAGAATTGGTTTAGAAGCATGCTCCATGAACTTATCAAATATCC	69	16053	KAG6388311.1	sacsin	K17592
945	KAG6426398.1	84.058	69	11	0	1	69	666	598	7.08e-14	76.1	KAG6426398.1	83	58	58	0	84.06	1	-1	TGCAGAACTGATATTTCCCAAGGCACAGAGAGCAAGCCCAACAATATACTGGTTGGTGTGGTTTAGATC	TGCAGAGCATATATTACCCAAAGCACAAAGAGCAAGTCCAACAATATATTGGTTTGTATGATTTAGATC	69	2808	KAG6426398.1	AP-1 complex subunit gamma-1	K12391
945	KAG6429598.1	84.058	69	11	0	1	69	579	511	7.08e-14	76.1	KAG6429598.1	83	58	58	0	84.06	1	-1	TGCAGAACTGATATTTCCCAAGGCACAGAGAGCAAGCCCAACAATATACTGGTTGGTGTGGTTTAGATC	TGCCGAGCAGATATTACCCAAAGCACAAAGAGCAAGTCCAACAATATATTGGTTTGTATGATTTAGATC	69	2853	KAG6429598.1	AP-1 complex subunit gamma-1	K12391
946	KAG6426398.1	84.058	69	11	0	1	69	666	598	7.08e-14	76.1	KAG6426398.1	83	58	58	0	84.06	1	-1	TGCAGAACTGATATTTCCCAAGGCACAGAGAGCAAGCCCAACAATATACTGGTTGGTGTGGTTTAGATC	TGCAGAGCATATATTACCCAAAGCACAAAGAGCAAGTCCAACAATATATTGGTTTGTATGATTTAGATC	69	2808	KAG6426398.1	AP-1 complex subunit gamma-1	K12391
946	KAG6429598.1	84.058	69	11	0	1	69	579	511	7.08e-14	76.1	KAG6429598.1	83	58	58	0	84.06	1	-1	TGCAGAACTGATATTTCCCAAGGCACAGAGAGCAAGCCCAACAATATACTGGTTGGTGTGGTTTAGATC	TGCCGAGCAGATATTACCCAAAGCACAAAGAGCAAGTCCAACAATATATTGGTTTGTATGATTTAGATC	69	2853	KAG6429598.1	AP-1 complex subunit gamma-1	K12391
955	KAG6428743.1	88.679	53	6	0	1	53	489	541	3.01e-12	69.8	KAG6428743.1	76	47	47	0	88.68	1	1	TGCAGAACTGGCCAAGAACTTGAATCTTCTTAGGAGCTCTGTGAATGGAGCAA	TGAAGAACTGGCCAAGAAGCTGAATCTTCTTAGGAGCTCGGTGAATGATGCAA	69	552	KAG6428743.1	Hypothetical protein	Uncharacterized protein
955	KAG6431806.1	88.679	53	6	0	1	53	1266	1318	3.01e-12	69.8	KAG6431806.1	76	47	47	0	88.68	1	1	TGCAGAACTGGCCAAGAACTTGAATCTTCTTAGGAGCTCTGTGAATGGAGCAA	TGAAGAACTGGCCAAGAAGCTGAATCTTCTTAGGAGCTCGGTGAATGATGCAA	69	1329	KAG6431806.1	adenylosuccinate lyase [EC:4.3.2.2]	K01756
963	KAG6436342.1	85.507	69	10	0	1	69	1119	1051	1.67e-15	80.6	KAG6436342.1	88	59	59	0	85.51	1	-1	TGCAGAACTTACAAGTTTGCTACCACTTGTTGGGCTAAGGCCGTCCTTCGTAGTAGGAGCATTACCATT	TGTAGAACTCACAAGTTTGCTACTACTTGTTGGGCTCAAGCTATCCTTCATAGCAGGAGCAGTACCATT	69	1794	KAG6436342.1	Hypothetical protein	Uncharacterized protein
963	KAG6414886.1	81.159	69	13	0	1	69	1113	1045	3.67e-11	67.1	KAG6414886.1	73	56	56	0	81.16	1	-1	TGCAGAACTTACAAGTTTGCTACCACTTGTTGGGCTAAGGCCGTCCTTCGTAGTAGGAGCATTACCATT	TGTAGAGCTCACAAGTTTGCTACTTCTTGTTGGGCCCAAGGCATCCTTCGTAGCAGGAGCAGTGCCATT	69	1761	KAG6414886.1	Hypothetical protein	Uncharacterized protein
963	KAG6417389.1	81.159	69	13	0	1	69	732	664	3.67e-11	67.1	KAG6417389.1	73	56	56	0	81.16	1	-1	TGCAGAACTTACAAGTTTGCTACCACTTGTTGGGCTAAGGCCGTCCTTCGTAGTAGGAGCATTACCATT	TGTAGAACTCACAAGTTTGCTACTTCTTGTTGGGCCCAAGGCATCCTTCATAGCAGGAGCAGTGCCATT	69	1371	KAG6417389.1	Hypothetical protein	Uncharacterized protein
965	KAG6410469.1	96.491	57	2	0	13	69	2373	2317	7.56e-20	95.1	KAG6410469.1	104	55	55	0	96.49	1	-1	TGTGCTACTATCTCGAATTACAGAAGCAGTCAGACCAGCAGCTGATGAGCCTTTTCC	TGTGCTATTATCTCGAATTACAGAAGCAGTCAGACCAGCAGCAGATGAGCCTTTTCC	69	3303	KAG6410469.1	DNA replication licensing factor MCM5 [EC:3.6.4.12]	K02209
965	KAG6424211.1	96.429	56	2	0	14	69	1214	1159	2.64e-19	93.3	KAG6424211.1	102	54	54	0	96.43	1	-1	GTGCTACTATCTCGAATTACAGAAGCAGTCAGACCAGCAGCTGATGAGCCTTTTCC	GTGCTATTATCTCGAATTACAGAAGCAGTCAGACCAGCAGCAGATGAGCCTTTTCC	69	2145	KAG6424211.1	DNA replication licensing factor MCM5 [EC:3.6.4.12]	K02209
965	KAG6413042.1	94.737	57	3	0	13	69	918	862	3.22e-18	90.6	KAG6413042.1	99	54	54	0	94.74	1	-1	TGTGCTACTATCTCGAATTACAGAAGCAGTCAGACCAGCAGCTGATGAGCCTTTTCC	TGTGCTATTATCTCGAATTACAGAAGCAGTCAGACCAGCAGCAGATGAACCTTTTCC	69	3273	KAG6413042.1	Hypothetical protein	Uncharacterized protein
966	KAG6427240.1	92.754	69	5	0	1	69	2478	2410	5.1e-22	103	KAG6427240.1	113	64	64	0	92.75	1	-1	TGCAGAACTTAGAACTTCTGCTCGACGAGCATCCAATTCAGCCATTTGACCAGCTCTCAGGAAGACCTT	TGCAGAACTAAGAACTTCTGTTCGACGAGCATCCAGTTCAGCCATTTGACCTGCTCTTAGGAAGACCTT	69	4968	KAG6427240.1	myosin V	K10357
966	KAG6430282.1	91.304	69	6	0	1	69	2025	1957	6.21e-21	98.7	KAG6430282.1	108	63	63	0	91.3	1	-1	TGCAGAACTTAGAACTTCTGCTCGACGAGCATCCAATTCAGCCATTTGACCAGCTCTCAGGAAGACCTT	TGCAGAACTAAGAACTTCTGTTCGGCGAGCATCCAGTTCAGCCATTTGACCTGCTCTTAGGAAGACCTT	69	4539	KAG6430282.1	myosin V	K10357
966	KAG6434219.1	92.308	65	5	0	1	65	2313	2249	7.56e-20	96	KAG6434219.1	105	60	60	0	92.31	1	-1	TGCAGAACTTAGAACTTCTGCTCGACGAGCATCCAATTCAGCCATTTGACCAGCTCTCAGGAAGA	TGCAGAACTAAGAACTTCTGTTCGACGAGCATCCAGTTCAGCCATTTGACCTGCTCTTAGGAAGA	69	4371	KAG6434219.1	myosin V	K10357
967	KAG6399593.1	86.957	69	9	0	1	69	914	982	1.37e-16	85.1	KAG6399593.1	93	60	60	0	86.96	1	1	TGCAGAACTTCAAGACCCAGCTGGATGAAGACCCCATTGTCCACAGGCACCTATCCGCCCTCTACGACA	TGCAGAATTTCAAGAATGAGTTGGATGAGGACCCAATTGTCCACAGGCACCTTTCCGCCCTCTATGACA	69	1518	KAG6399593.1	26S proteasome regulatory subunit N6	K03036
967	KAG6392815.1	85.507	69	10	0	1	69	914	982	1.67e-15	80.6	KAG6392815.1	88	59	59	0	85.51	1	1	TGCAGAACTTCAAGACCCAGCTGGATGAAGACCCCATTGTCCACAGGCACCTATCCGCCCTCTACGACA	TGCAAAATTTCAAGAATGAGTTGGACGAAGACCCAATTGTCCACAGGCACCTTTCCTCCCTCTACGACA	69	1269	KAG6392815.1	26S proteasome regulatory subunit N6	K03036
967	KAG6397371.1	84.058	69	11	0	1	69	986	1054	7.08e-14	76.1	KAG6397371.1	83	58	58	0	84.06	1	1	TGCAGAACTTCAAGACCCAGCTGGATGAAGACCCCATTGTCCACAGGCACCTATCCGCCCTCTACGACA	TGCAGAATTTCAAGAATGAGTTGGACGAGGATCCAATTGTCCACAGGCACCTTTCCGCCCTCTATGACA	69	1341	KAG6397371.1	26S proteasome regulatory subunit N6	K03036
968	KAG6397336.1	86.441	59	8	0	2	60	108	50	8.63e-13	71.6	KAG6397336.1	78	51	51	0	86.44	1	-1	GCAGAACTTCAAGCTGCGGCCAGAAAGTGGAGCAAGAGCTTCCCTTAGCTGTATTACCT	GCAAAACTTTAAGCTGCGACCAGAAAGTGGACCAAGAGCATCCCTGAGCTGTTTAACCT	69	861	KAG6397336.1	Hypothetical protein	Uncharacterized protein
969	KAG6399500.1	89.655	58	6	0	1	58	955	898	5.82e-15	78.8	KAG6399500.1	86	52	52	0	89.66	1	-1	TGCAGAACTTCACAAGAAGGATCGTTGGGATCCCTATTAGTATTCTACCCACTAAGGC	TGCAGAACTTCACAAGAAGGATTGTCGGGATTCCTAGTAGTAGTCTACCCACAAAGGC	69	1251	KAG6399500.1	Hypothetical protein	Uncharacterized protein
969	KAG6397239.1	87.931	58	7	0	1	58	403	346	2.47e-13	74.3	KAG6397239.1	81	51	51	0	87.93	1	-1	TGCAGAACTTCACAAGAAGGATCGTTGGGATCCCTATTAGTATTCTACCCACTAAGGC	TGCAGAATTTCACAAGAAGGATTGTCGGGATTCCTAGTAGTAGTCTACCCACAAAGGC	69	663	KAG6397239.1	Hypothetical protein	Uncharacterized protein
969	KAG6410991.1	87.5	56	7	0	3	58	917	862	3.01e-12	70.7	KAG6410991.1	77	49	49	0	87.5	1	-1	CAGAACTTCACAAGAAGGATCGTTGGGATCCCTATTAGTATTCTACCCACTAAGGC	CAGAACTTCACGAGAAGGATTGTCGGGATTCCTAGTAGTAGTCTACCCACAAAGGC	69	1179	KAG6410991.1	Hypothetical protein	Uncharacterized protein
971	KAG6411490.1	88.235	51	6	0	17	67	167	217	3.67e-11	66.2	KAG6411490.1	72	45	45	0	88.24	1	1	ATGAACAACAGACTCAGTTCCAAAAGCTGTTAGCGCAAGAGAACCAAAAGA	ATGAACAACACATTCACTTCCAAAAGTTGTTAGCAGAAGAGAACCAAAAGA	69	873	KAG6411490.1	Hypothetical protein	Uncharacterized protein
972	KAG6385592.1	83.582	67	11	0	3	69	380	314	8.63e-13	72.5	KAG6385592.1	79	56	56	0	83.58	1	-1	CAGAACTTCCCATACGAAACGCAAGCTTCACTCCATGACACAACTTGATCGCCATTGTAGGCCAAGT	CAGAATTTTCCATAAGAAACACAGCCTGAACTCCATGACACCATTTGATCACCATTGTAGGCCAAGT	69	525	KAG6385592.1	Hypothetical protein	Uncharacterized protein
972	KAG6387430.1	82.09	67	12	0	3	69	380	314	1.05e-11	68	KAG6387430.1	74	55	55	0	82.09	1	-1	CAGAACTTCCCATACGAAACGCAAGCTTCACTCCATGACACAACTTGATCGCCATTGTAGGCCAAGT	CAGAATTTTCCATAAGATACACAGCCTGAACTCCATGACACCATTTGATCACCATTGTAGGCCAAGT	69	525	KAG6387430.1	Hypothetical protein	Uncharacterized protein
973	KAG6407585.1	91.304	69	6	0	1	69	1631	1563	6.21e-21	98.7	KAG6407585.1	108	63	63	0	91.3	1	-1	TGCAGAACTTCTAAGCTTATTGTTTTCTCTGCCTTCCCGCGCTTCCTCTCCGGTTTCTTGCCTGCATCT	TGCAGAACTTCTAAGCTTATTGTTTTCTCTGCCTTCCCCCGCTTTCTCTCGGGCTTCTTGCCTACAACT	69	2823	KAG6407585.1	Hypothetical protein	Uncharacterized protein
973	KAG6399178.1	89.855	69	7	0	1	69	1808	1740	2.64e-19	94.2	KAG6399178.1	103	62	62	0	89.86	1	-1	TGCAGAACTTCTAAGCTTATTGTTTTCTCTGCCTTCCCGCGCTTCCTCTCCGGTTTCTTGCCTGCATCT	TGCAGAACTTCTAAGCTAATTGTTTTCTCTGCCTTACCCCGCTTTCTCTCAGGCTTCTTGCCTACATCT	69	3003	KAG6399178.1	Hypothetical protein	Uncharacterized protein
973	KAG6405403.1	90.909	66	6	0	1	66	1724	1659	2.64e-19	93.3	KAG6405403.1	102	60	60	0	90.91	1	-1	TGCAGAACTTCTAAGCTTATTGTTTTCTCTGCCTTCCCGCGCTTCCTCTCCGGTTTCTTGCCTGCA	TGCAGAACTTCTAAGCTAATTGTTTTCTCTGCCTTCCCCCGCTTTCTCTCAGGCTTCTTGCCTACA	69	2916	KAG6405403.1	Hypothetical protein	Uncharacterized protein
976	KAG6396547.1	86.765	68	9	0	1	68	685	618	4.77e-16	83.3	KAG6396547.1	91	59	59	0	86.76	1	-1	TGCAGAACTTGATTGCGTCGTATCCGATGGCGCTTGGCCAGCCAAACATGAATACCAAATTGTAGATG	TGCAGAAGTCGATAGCATCATACCCAATGGCGTTTGGCCAGCCGAACATGAATACCAAATTGTAGATG	69	972	KAG6396547.1	solute carrier family 35 (UDP-galactose transporter), member B1	K15275
976	KAG6398840.1	86.765	68	9	0	1	68	787	720	4.77e-16	83.3	KAG6398840.1	91	59	59	0	86.76	1	-1	TGCAGAACTTGATTGCGTCGTATCCGATGGCGCTTGGCCAGCCAAACATGAATACCAAATTGTAGATG	TGCAGAAGTCGATAGCATCGTACCCAATGGCGTTTGGCCAACCGAACATGAATACCAAATTGTAGATG	69	1074	KAG6398840.1	solute carrier family 35 (UDP-galactose transporter), member B1	K15275
976	KAG6426297.1	85.294	68	10	0	2	69	357	290	5.82e-15	78.8	KAG6426297.1	86	58	58	0	85.29	1	-1	GCAGAACTTGATTGCGTCGTATCCGATGGCGCTTGGCCAGCCAAACATGAATACCAAATTGTAGATGG	GCAGAACTGAACTGCGTCGTAGCCAATGGCACCTGGCCATCCGAACATGAATACCAGATTGTAGATGG	69	645	KAG6426297.1	solute carrier family 35 (UDP-galactose transporter), member B1	K15275
978	KAG6401190.1	92.308	65	5	0	5	69	1645	1709	7.56e-20	96	KAG6401190.1	105	60	60	0	92.31	1	1	GAACTTGGATTCAAGAAGCCACTCACCAAGGAGGAAAAGATACAGAAAAAGAAACAACGTCTCGC	GAACTTGGATTCAAGAAGCCATTGACCAAAGAGGAAAAGATCGAGAAAAAGAAACAACGTCTCGC	69	2385	KAG6401190.1	Hypothetical protein	Uncharacterized protein
978	KAG6403382.1	92.308	65	5	0	5	69	1084	1148	7.56e-20	96	KAG6403382.1	105	60	60	0	92.31	1	1	GAACTTGGATTCAAGAAGCCACTCACCAAGGAGGAAAAGATACAGAAAAAGAAACAACGTCTCGC	GAACTTGGATTCAAGAAGCCATTGACCAAGGAGGAAAAGATCGAGAAAAAGAAACAACATCTCGC	69	1797	KAG6403382.1	Hypothetical protein	Uncharacterized protein
985	KAG6437956.1	89.706	68	7	0	1	68	438	371	9.22e-19	92.4	KAG6437956.1	101	61	61	0	89.71	1	-1	TGCAGAACTTTGATACATGTCTTGTCCACCACATACTGGACCACTATGTGTCCTAGTTGATGCATATG	TGTAGAACCTTGATACACGTCTTGCCCACCACTTACTGGACCACTAGGTGTCCTAGTTAATGCATATG	69	9459	KAG6437956.1	Hypothetical protein	Uncharacterized protein
985	KAG6434603.1	86.765	68	9	0	1	68	438	371	4.77e-16	83.3	KAG6434603.1	91	59	59	0	86.76	1	-1	TGCAGAACTTTGATACATGTCTTGTCCACCACATACTGGACCACTATGTGTCCTAGTTGATGCATATG	TGTAGAACCTTGATACGCGTCTTGCCCACCACTTACTGGACCACTAGGTGTCCTAGCTAATGCATATG	69	9111	KAG6434603.1	Hypothetical protein	Uncharacterized protein
993	KAG6427244.1	90.566	53	5	0	2	54	2339	2287	2.47e-13	74.3	KAG6427244.1	81	48	48	0	90.57	1	-1	GCAGAAGAAACACCATCACATTTTCCATTTGTATCTACCGCTTTTACAGGCTT	GCAGAAGAACCATCATCACATTTTCCATTAGTATCTACCACTTTTCCAGGCTT	69	3834	KAG6427244.1	Hypothetical protein	Uncharacterized protein
993	KAG6430286.1	88.679	53	6	0	2	54	2384	2332	3.01e-12	69.8	KAG6430286.1	76	47	47	0	88.68	1	-1	GCAGAAGAAACACCATCACATTTTCCATTTGTATCTACCGCTTTTACAGGCTT	GCAGAAGAACCATCATCACATTTTCCATTAGTATCTACCACTTTACCAGGCTT	69	3885	KAG6430286.1	Hypothetical protein	Uncharacterized protein
993	KAG6437543.1	88.462	52	6	0	3	54	2443	2392	1.05e-11	68	KAG6437543.1	74	46	46	0	88.46	1	-1	CAGAAGAAACACCATCACATTTTCCATTTGTATCTACCGCTTTTACAGGCTT	CAGAAGAACCATCACCACATTTTCCATTAGTATCAACCTCTTTTACAGGCTT	69	3873	KAG6437543.1	Hypothetical protein	Uncharacterized protein
994	KAG6424477.1	87.5	64	8	0	6	69	1315	1378	1.67e-15	80.6	KAG6424477.1	88	56	56	0	87.5	1	1	AAGAAACAGAAGCAGGATGCTACAGCTGGTCTTCGAACATGCAACAATATTCTTACAATGGCAC	AAGAAACAAAAGCAGAATGCTACAGCTGGGCTTCGAACGTGCAACAATATACTAGCAATGACAC	69	1662	KAG6424477.1	Hypothetical protein	Uncharacterized protein
999	KAG6408814.1	83.824	68	11	0	2	69	498	565	2.47e-13	74.3	KAG6408814.1	81	57	57	0	83.82	1	1	GCAGAAGAAAGAAGCTGTCAAGCCTGTTCCTCCAGTGAAACGTGATGTTAGCCGGACGTGGAGTTTCA	GCAGAAGAAAGAGGGTGATACCCCTGTTCTTGTAGTGAAACGTGAAGTTAGCCGGACCTGGAGTTTCA	69	4134	KAG6408814.1	Hypothetical protein	Uncharacterized protein
999	KAG6408775.1	83.824	68	11	0	2	69	498	565	2.47e-13	74.3	KAG6408775.1	81	57	57	0	83.82	1	1	GCAGAAGAAAGAAGCTGTCAAGCCTGTTCCTCCAGTGAAACGTGATGTTAGCCGGACGTGGAGTTTCA	GCAGAAGAAAGAGGGTGATACCCCTGTTCTTGTAGTGAAACGTGAAGTTAGCCGGACCTGGAGTTTCA	69	4245	KAG6408775.1	Hypothetical protein	Uncharacterized protein
999	KAG6406436.1	83.099	71	9	1	2	69	504	574	2.47e-13	73.4	KAG6406436.1	80	59	59	3	83.1	1	1	GCAGAAGAAAGAAGCTGTCAAG---CCTGTTCCTCCAGTGAAACGTGATGTTAGCCGGACGTGGAGTTTCA	GCAGAAGAAAGAAGGTGATGATACCCCTGTTCCTTTAGTGAAACGTGAAGTTAGCCGGACCTGGAGTTTCA	69	4413	KAG6406436.1	Hypothetical protein	Uncharacterized protein
1005	KAG6437042.1	84.127	63	10	0	1	63	690	752	3.01e-12	69.8	KAG6437042.1	76	53	53	0	84.13	1	1	TGCAGAAGAAATGTCCTTGAAGAAAGGTATATCTCTTGGTGCAGCCCATGATCTGCTATCCCA	TGCTGAAGAAATGTCGTTGCAGAAAGGTATCTCTCTTACTTCTGCCCATGACATGCTATCCCA	69	783	KAG6437042.1	V-type H+-transporting ATPase subunit D	K02149
1009	KAG6421805.1	85.507	69	10	0	1	69	5868	5936	1.67e-15	80.6	KAG6421805.1	88	59	59	0	85.51	1	1	TGCAGAAGAACAAGATGTTCTATTGGAGATTGAACAAATTATGAAGAACATCAGAAGAGTAATGCATCA	TGCAGACGAGCAAGATGTTCTTGTGGAGATTGAGTCAATTATGAAGAGCATCAGAAGAATAATGCACCA	69	6558	KAG6421805.1	DNA-directed RNA polymerase V subunit 1 [EC:2.7.7.6]	K16251
1009	KAG6424833.1	85.507	69	10	0	1	69	5208	5276	1.67e-15	80.6	KAG6424833.1	88	59	59	0	85.51	1	1	TGCAGAAGAACAAGATGTTCTATTGGAGATTGAACAAATTATGAAGAACATCAGAAGAGTAATGCATCA	TGCAGACGAGCAAGATGTTCTTGTGGAGATTGAGTCAATTATGAAGAGCATCAGAAGAATAATGCACCA	69	5898	KAG6424833.1	DNA-directed RNA polymerase V subunit 1 [EC:2.7.7.6]	K16251
1010	KAG6409391.1	88.333	60	7	0	3	62	1614	1555	2.03e-14	77.9	KAG6409391.1	85	53	53	0	88.33	1	-1	CAGAAGAACAAGATTCTGGAGCTGATAATCTTCTTGGTATTTGTCTCCGAAATAAGTGAT	CAGGATAACAAGATTCTTAAGCTGATAGTCTTCTTGATATTTGTCTCCAAAATAAGTGAT	69	2130	KAG6409391.1	Hypothetical protein	Uncharacterized protein
1010	KAG6404785.1	82.609	69	9	1	3	68	1626	1558	3.01e-12	69.8	KAG6404785.1	76	57	57	3	82.61	1	-1	CAGAAGAACAAGATTCTGGAGCTGATAATCTTCTT---GGTATTTGTCTCCGAAATAAGTGATTCCCAA	CAGGAGATGAAGATTGTGGAGCTGATAGTCTTCATTTGGGTATTTATCTCCAAAATAAGTGATTGCCAA	69	2178	KAG6404785.1	Hypothetical protein	Uncharacterized protein
1022	KAG6406567.1	94	50	3	0	2	51	772	821	2.03e-14	77.9	KAG6406567.1	85	47	47	0	94	1	1	GCAGAAGAAGAGAAATATAGAGTTCGCCCTAAGGCTTCAAAGAAAAAGTC	GCAGAAGAAGAGAAATATCGAGTTCGTCCTAAGGCTTCAAGGAAAAAGTC	69	1905	KAG6406567.1	Hypothetical protein	Uncharacterized protein
1022	KAG6408913.1	94	50	3	0	2	51	772	821	2.03e-14	77.9	KAG6408913.1	85	47	47	0	94	1	1	GCAGAAGAAGAGAAATATAGAGTTCGCCCTAAGGCTTCAAAGAAAAAGTC	GCAGAAGAAGAGAAATATCGAGTTCGTCCTAAGGCTTCAAGGAAAAAGTC	69	1905	KAG6408913.1	Hypothetical protein	Uncharacterized protein
1025	KAG6420359.1	96.226	53	2	0	1	53	599	651	1.12e-17	87.8	KAG6420359.1	96	51	51	0	96.23	1	1	TGCAGAAGAAGATCAACAGGCGTAGGGATTTCTATCATTGGTGGACCAAATAA	TGCAGAAGAAGATCAACAGGCGAAGAGATTTCTATCATTGGTGGACCAAATAA	69	651	KAG6420359.1	NADH dehydrogenase (ubiquinone) Fe-S protein 7 [EC:7.1.1.2]	K03940
1025	KAG6423394.1	96.226	53	2	0	1	53	599	651	1.12e-17	87.8	KAG6423394.1	96	51	51	0	96.23	1	1	TGCAGAAGAAGATCAACAGGCGTAGGGATTTCTATCATTGGTGGACCAAATAA	TGCAGAAGAAGATCAACAGGCGTAGAGATTTCTATCACTGGTGGACCAAATAA	69	651	KAG6423394.1	NADH dehydrogenase (ubiquinone) Fe-S protein 7 [EC:7.1.1.2]	K03940
1028	KAG6388201.1	91.304	69	6	0	1	69	1299	1231	6.21e-21	98.7	KAG6388201.1	108	63	63	0	91.3	1	-1	TGCAGAAGAAGCCAACATTGGCACAGGGGTGGCCATACCGTGGCTTGGCATTTTCCATGTCCAGTTTGA	TGCAGAAGAAGCCGACATGGGGACAGGGGTGGCCATACCGTGGCTCGGCATTTTCCATTGCCAGTTTGA	69	1404	KAG6388201.1	AP2-like factor, euAP2 lineage	K09284
1028	KAG6389209.1	88.406	69	8	0	1	69	1176	1108	3.22e-18	89.7	KAG6389209.1	98	61	61	0	88.41	1	-1	TGCAGAAGAAGCCAACATTGGCACAGGGGTGGCCATACCGTGGCTTGGCATTTTCCATGTCCAGTTTGA	TGCAGAAGAAGCCAATACGGGGACCGGGGTGACCATACCGTGACTTGGCATTTTCCATGGCCAGTTTGA	69	1281	KAG6389209.1	AP2-like factor, euAP2 lineage	K09284
1028	KAG6391055.1	88.406	69	8	0	1	69	1171	1103	3.22e-18	89.7	KAG6391055.1	98	61	61	0	88.41	1	-1	TGCAGAAGAAGCCAACATTGGCACAGGGGTGGCCATACCGTGGCTTGGCATTTTCCATGTCCAGTTTGA	TGCAGAAGAAGCCAATATGGGGACCGTGGTGACCATACCGTGGCTTGGTATTTTCCATGGCCAGTTTGA	69	1422	KAG6391055.1	Hypothetical protein	Uncharacterized protein
1038	KAG6384975.1	84.848	66	10	0	4	69	671	736	7.08e-14	75.2	KAG6384975.1	82	56	56	0	84.85	1	1	AGAAGAATACCGGGGTCTTGTACTTGGCGACTTCAGTTCTGATCTTGATGTTCCTTCCTATATTTT	AGAAGCACACCAGCGTATTGTACTTGGCTGCTTCAGTGCTGATTTTGATGTTCCTTCCTATGTTTT	69	828	KAG6384975.1	Hypothetical protein	Uncharacterized protein
1038	KAG6386789.1	83.333	66	11	0	4	69	548	613	3.01e-12	70.7	KAG6386789.1	77	55	55	0	83.33	1	1	AGAAGAATACCGGGGTCTTGTACTTGGCGACTTCAGTTCTGATCTTGATGTTCCTTCCTATATTTT	AGAAGCACACCAGCATATTGCACTTGGCTGCTTCAGTGCTGATTTTGATGTTCCTTCCTATATTTT	69	705	KAG6386789.1	Hypothetical protein	Uncharacterized protein
1040	KAG6413112.1	88.333	60	7	0	10	69	2597	2656	2.03e-14	77.9	KAG6413112.1	85	53	53	0	88.33	1	1	ATCACATGGTGTATGACTACTGCAAGGATCGATGGAGGTTCCCCAAGGGCCCTGCCCGTG	ATCATATGGTCTATGATTATTGCAAGGATAGATGGAGGTTTCCTAAGGGCCCTGCCCGTG	69	2673	KAG6413112.1	Hypothetical protein	Uncharacterized protein
1040	KAG6410538.1	84.058	69	11	0	1	69	902	970	7.08e-14	76.1	KAG6410538.1	83	58	58	0	84.06	1	1	TGCAGAAGAATCACATGGTGTATGACTACTGCAAGGATCGATGGAGGTTCCCCAAGGGCCCTGCCCGTG	TGCAAAGGGACCATATGGTCTATGATTATTGCAAGGATAGATGGAGGTTTCCTAAGGGCCCTGCCCGTG	69	987	KAG6410538.1	xyloglucan:xyloglucosyl transferase TCH4 [EC:2.4.1.207]	K14504
1045	KAG6405169.1	94.203	69	4	0	1	69	189	257	1.2e-23	107	KAG6405169.1	118	65	65	0	94.2	1	1	TGCAGAAGAATGCACCTCAGTGCTGGAACTTGACTACAATCACACCGGAGCACTGATGTTGCGCGCTCA	TGCAGAAGAATGCACCTCGGTTCTGGAACTTGATTACAATCACACCGGAGCACTGATGTTGCGTGCTCA	69	825	KAG6405169.1	Hypothetical protein	Uncharacterized protein
1045	KAG6407330.1	89.855	69	7	0	1	69	189	257	2.64e-19	94.2	KAG6407330.1	103	62	62	0	89.86	1	1	TGCAGAAGAATGCACCTCAGTGCTGGAACTTGACTACAATCACACCGGAGCACTGATGTTGCGCGCTCA	TGCAGAAGAATGCACCTCGGTTTTGGAACTTGATTACAATCACACTGGAGCACTGATGTTGCGTTCTCA	69	933	KAG6407330.1	Hypothetical protein	Uncharacterized protein
1047	KAG6387857.1	85.507	69	10	0	1	69	767	835	1.67e-15	80.6	KAG6387857.1	88	59	59	0	85.51	1	1	TGCAGAAGAATGGGTTTGGAAACATGACGATCATCGTTGGAGAGATCGGATGGCCGACCGATGGGGACC	TGCAGAAGAACGGATACGGGAACATGACGATCATCGTTGGGGAAATCGGGTGGCCGACAGACGGGGACC	69	1452	KAG6387857.1	glucan endo-1,3-beta-glucosidase 5/6 [EC:3.2.1.39]	K19893
1047	KAG6409726.1	84.058	69	11	0	1	69	863	931	7.08e-14	76.1	KAG6409726.1	83	58	58	0	84.06	1	1	TGCAGAAGAATGGGTTTGGAAACATGACGATCATCGTTGGAGAGATCGGATGGCCGACCGATGGGGACC	TGCAGAAGAACGGATACGGGAACATGACGATCATTGTTGGGGAAATCGGGTGGCCGACTGACGGGGACC	69	1548	KAG6409726.1	glucan endo-1,3-beta-glucosidase 5/6 [EC:3.2.1.39]	K19893
1057	KAG6432824.1	89.855	69	7	0	1	69	885	953	2.64e-19	94.2	KAG6432824.1	103	62	62	0	89.86	1	1	TGCAGAAGACACTGCTTTCTCCACAGCTCGTTTCTACCAGCTTGGTGGAACTTTCCTCAATTATTACAT	TGCAGAAGATACTGCATTCTCCACTGCGCGTTTTTACCAGCTTGGTGGAAGTTTCCTCAACTATTACAT	69	2670	KAG6432824.1	Hypothetical protein	Uncharacterized protein
1057	KAG6436162.1	86.957	69	9	0	1	69	807	875	1.37e-16	85.1	KAG6436162.1	93	60	60	0	86.96	1	1	TGCAGAAGACACTGCTTTCTCCACAGCTCGTTTCTACCAGCTTGGTGGAACTTTCCTCAATTATTACAT	TGCAGCAGATACTGCTTTCTCTACAGCCCGTTTTTACCAGCTTGGTGGAAGTTTCCTAAACTACTACAT	69	2592	KAG6436162.1	Hypothetical protein	Uncharacterized protein
1059	KAG6383952.1	85.507	69	10	0	1	69	4058	4126	1.67e-15	80.6	KAG6383952.1	88	59	59	0	85.51	1	1	TGCAGAAGACAGAGGGTGAATTCAAGGCAGTAGCAACAGTCAAAGATCAATTCTCTATTGAGATTGAAA	TGCAGAAGACAGATGATGAGCTCAAGGCTATAGCAACAGTCAAAGATCAGTTGATTATTGAGATTGAAA	69	5328	KAG6383952.1	Hypothetical protein	Uncharacterized protein
1059	KAG6402996.1	85.507	69	10	0	1	69	3497	3565	1.67e-15	80.6	KAG6402996.1	88	59	59	0	85.51	1	1	TGCAGAAGACAGAGGGTGAATTCAAGGCAGTAGCAACAGTCAAAGATCAATTCTCTATTGAGATTGAAA	TGCAGAAGACAGATGATGAGCTCAAGGCTATAGCAACAGTCAAAGATCAGTTGATTATTGAGATTGAAA	69	5271	KAG6402996.1	Hypothetical protein	Uncharacterized protein
1059	KAG6400815.1	85.075	67	10	0	1	67	3143	3209	2.03e-14	77	KAG6400815.1	84	57	57	0	85.07	1	1	TGCAGAAGACAGAGGGTGAATTCAAGGCAGTAGCAACAGTCAAAGATCAATTCTCTATTGAGATTGA	TGCAGAAGACAGATGATGAGCTCAAGGCTATAGCAACAGTCAAAGATCAGTTGAATATTGAGATTGA	69	4923	KAG6400815.1	Hypothetical protein	Uncharacterized protein
1061	KAG6430350.1	82.09	67	12	0	3	69	1349	1415	1.05e-11	68	KAG6430350.1	74	55	55	0	82.09	1	1	CAGAAGACATCAACTCTGATGATGAACTCGCACACCAGACAATTTTGAGTCCTTTATTACCTTCAAA	CAGAAGATATCAACTCAGATGATGAACTCACTCGTGAGACAATTTTAAGTCCCTTACTTCCTTCGAA	69	5631	KAG6430350.1	DNA polymerase zeta [EC:2.7.7.7]	K02350
1062	KAG6430350.1	82.09	67	12	0	3	69	1349	1415	1.05e-11	68	KAG6430350.1	74	55	55	0	82.09	1	1	CAGAAGACATCAACTCTGATGATGAACTCGCACACCAGACAATTTTGAGTCCTTTATTACCTTCAAA	CAGAAGATATCAACTCAGATGATGAACTCACTCGTGAGACAATTTTAAGTCCCTTACTTCCTTCGAA	69	5631	KAG6430350.1	DNA polymerase zeta [EC:2.7.7.7]	K02350
1064	KAG6388519.1	88.889	54	6	0	16	69	371	424	8.63e-13	71.6	KAG6388519.1	78	48	48	0	88.89	1	1	CCAAGGGCCATGGCTCAATCAGTGGATCTCATATGGGTGATAGAAGGAGCGCTC	CCAAGGGCCACGGCTCGATAAGTGGATCTCATATGGGTGACAAAAGGAGCACTC	69	1653	KAG6388519.1	RNA polymerase II-associated factor 1	K15174
1064	KAG6390565.1	88.889	54	6	0	16	69	692	745	8.63e-13	71.6	KAG6390565.1	78	48	48	0	88.89	1	1	CCAAGGGCCATGGCTCAATCAGTGGATCTCATATGGGTGATAGAAGGAGCGCTC	CCAAGGGCCATGGCTCGATTAGTGGATCTCATGTGGGTGACAAAAGGAGCACTC	69	1950	KAG6390565.1	RNA polymerase II-associated factor 1	K15174
1072	KAG6385184.1	85.507	69	9	1	1	69	4149	4216	2.03e-14	77	KAG6385184.1	84	59	59	1	85.51	1	1	TGCAGAAGACGTGATCTTCCAGATGCAACAAGAAGAGGATGGAAGAAAACAGCATAAAAGGGGAACCTT	TGCAGAGGACATCATATTCCAATTGCAACAAGATGAGGATGGGAGAAAACAGTATAAAAGGGG-ACCTT	69	5232	KAG6385184.1	E1A/CREB-binding protein [EC:2.3.1.48]	K04498
1072	KAG6387027.1	85.507	69	9	1	1	69	4149	4216	2.03e-14	77	KAG6387027.1	84	59	59	1	85.51	1	1	TGCAGAAGACGTGATCTTCCAGATGCAACAAGAAGAGGATGGAAGAAAACAGCATAAAAGGGGAACCTT	TGCAGAGGACATCATATTCCAATTGCAACAAGATGAGGATGGGAGAAAACAGCATAAAAGAGG-ACCTT	69	5223	KAG6387027.1	E1A/CREB-binding protein [EC:2.3.1.48]	K04498
1072	KAG6420407.1	85.507	69	9	1	1	69	4269	4336	2.03e-14	77	KAG6420407.1	84	59	59	1	85.51	1	1	TGCAGAAGACGTGATCTTCCAGATGCAACAAGAAGAGGATGGAAGAAAACAGCATAAAAGGGGAACCTT	TGCAGAGGACATAATCTTCCAATTGCAACAAGATGAGGATGGGAGAAAACAGCATAAGAAGGG-ACCTT	69	5400	KAG6420407.1	E1A/CREB-binding protein [EC:2.3.1.48]	K04498
1074	KAG6389704.1	92.754	69	5	0	1	69	4253	4321	5.1e-22	103	KAG6389704.1	113	64	64	0	92.75	1	1	TGCAGAAGACTATAAGGACAGAGTTTGCGGATTGCACGGTCATCACCGTGGCACATAGAATACCCACGG	TGCAGAAGACTATAAGGACAGAGTTTGCAGATTGCACCGTGATCACCGTGGCTCACAGAATACCCACGG	69	4473	KAG6389704.1	ATP-binding cassette, subfamily C (CFTR/MRP), member 2	K05666
1077	KAG6428500.1	83.333	66	11	0	1	66	279	344	3.01e-12	70.7	KAG6428500.1	77	55	55	0	83.33	1	1	TGCAGAAGACTTGGCTCGGAGCAGAGGTCGGGTTCTGTCGTTGCACCAGCAGATACTGAGGAGCCT	TGCTGAGGATTTGGCTCGGAACAGGGGGCGGGTTCTGTCACTGTACCGGCACATACTGAGGAGCCT	69	531	KAG6428500.1	Hypothetical protein	Uncharacterized protein
1078	KAG6428500.1	84.848	66	10	0	1	66	279	344	7.08e-14	75.2	KAG6428500.1	82	56	56	0	84.85	1	1	TGCAGAAGACTTGGCTCGGAGCAGAGGTCGGGTTCTGTCGTTGTACCGGCAGATAATGAGGAGCCT	TGCTGAGGATTTGGCTCGGAACAGGGGGCGGGTTCTGTCACTGTACCGGCACATACTGAGGAGCCT	69	531	KAG6428500.1	Hypothetical protein	Uncharacterized protein
1079	KAG6428500.1	83.333	66	11	0	1	66	279	344	3.01e-12	70.7	KAG6428500.1	77	55	55	0	83.33	1	1	TGCAGAAGACTTGGCTCGGAGCAGAGGTCGGGTTCTGTCGTTTTACCAGCAGATACTGAGGAGCCT	TGCTGAGGATTTGGCTCGGAACAGGGGGCGGGTTCTGTCACTGTACCGGCACATACTGAGGAGCCT	69	531	KAG6428500.1	Hypothetical protein	Uncharacterized protein
1082	KAG6393670.1	96.226	53	2	0	16	68	342	290	1.12e-17	87.8	KAG6393670.1	96	51	51	0	96.23	1	-1	ACCTTGAACAATTACTTTGTAGCAAAGATAGAAATCTTGGGGAAATAAATCCA	ACCTTGAACGATTACTTTGTAGCAAAGATAAAAATCTTGGGGAAATAAATCCA	69	1734	KAG6393670.1	plant 3beta-hydroxysteroid-4alpha-carboxylate 3-dehydrogenase [EC:1.1.1.418]	K23558
1082	KAG6395503.1	96.226	53	2	0	16	68	564	512	1.12e-17	87.8	KAG6395503.1	96	51	51	0	96.23	1	-1	ACCTTGAACAATTACTTTGTAGCAAAGATAGAAATCTTGGGGAAATAAATCCA	ACCTTGAACGATTACTTTGTAGCAAAGATAAAAATCTTGGGGAAATAAATCCA	69	2280	KAG6395503.1	Hypothetical protein	Uncharacterized protein
1082	KAG6433348.1	96.226	53	2	0	16	68	330	278	1.12e-17	87.8	KAG6433348.1	96	51	51	0	96.23	1	-1	ACCTTGAACAATTACTTTGTAGCAAAGATAGAAATCTTGGGGAAATAAATCCA	ACCTTGAACGATTACTTTGTAGCAAAGATAAAAATCTTGGGGAAATAAATCCA	69	1719	KAG6433348.1	plant 3beta-hydroxysteroid-4alpha-carboxylate 3-dehydrogenase [EC:1.1.1.418]	K23558
1085	KAG6414861.1	91.379	58	5	0	2	59	1066	1009	4.77e-16	83.3	KAG6414861.1	91	53	53	0	91.38	1	-1	GCAGAAGAGAAGAAATTCGAGATGCCAGAAGTCGCTCGGGTCTCCTGGCTGAAATGTC	GCAGAAGAGAAGAAATTCTAGATGCCAACAGTCGCTCGGGGCTCCTGGCTGAAATATC	69	2586	KAG6414861.1	Hypothetical protein	Uncharacterized protein
1085	KAG6417368.1	89.831	59	6	0	1	59	995	937	1.67e-15	80.6	KAG6417368.1	88	53	53	0	89.83	1	-1	TGCAGAAGAGAAGAAATTCGAGATGCCAGAAGTCGCTCGGGTCTCCTGGCTGAAATGTC	TGCAGAAGAGAAGAAATTCTAGATGCCAACAGTCGCTCGGGGCTCCTGGTTGAAATATC	69	2496	KAG6417368.1	Hypothetical protein	Uncharacterized protein
1092	KAG6435610.1	85.075	67	10	0	3	69	985	1051	2.03e-14	77	KAG6435610.1	84	57	57	0	85.07	1	1	CAGAAGAGACCTTATCGCCCCGGTATAGATAACCTTCTTGTATTGCTCATTGGAGGGATCCCAATTG	CAGAAGAGGCCGTATCGTCCTGGTATAGATAATCTCCTCGTGTTGCTCATTGGAGGGATTCCGATTG	69	3066	KAG6435610.1	H+-transporting ATPase [EC:7.1.2.1]	K01535
1092	KAG6396015.1	86.667	60	8	0	10	69	1133	1192	2.47e-13	73.4	KAG6396015.1	80	52	52	0	86.67	1	1	GACCTTATCGCCCCGGTATAGATAACCTTCTTGTATTGCTCATTGGAGGGATCCCAATTG	GACCTTATCGTCCAGGTATTGATAACCTGCTTGTGCTTCTCATTGGAGGGATCCCCATTG	69	3201	KAG6396015.1	H+-transporting ATPase [EC:7.1.2.1]	K01535
1092	KAG6398288.1	85	60	9	0	10	69	815	874	1.05e-11	68.9	KAG6398288.1	75	51	51	0	85	1	1	GACCTTATCGCCCCGGTATAGATAACCTTCTTGTATTGCTCATTGGAGGGATCCCAATTG	GACCTTATCGTCCTGGAATTGATAACCTACTTGTGCTTCTCATTGGAGGGATCCCCATTG	69	2883	KAG6398288.1	H+-transporting ATPase [EC:7.1.2.1]	K01535
1100	KAG6393744.1	85.075	67	10	0	3	69	1103	1169	2.03e-14	77	KAG6393744.1	84	57	57	0	85.07	1	1	CAGAAGAGATTCTTGGGCTGAAAGCCATGTTTAGAAATATGGACACCGACAAAAGCGGCACCATCAC	CAGAGGAAATACATGGTCTGAAAGCAATGTTCACAAATATGGACACTGACAAAAGTGGCACCATCAC	69	1551	KAG6393744.1	calcium-dependent protein kinase [EC:2.7.11.1]	K13412
1101	KAG6393744.1	85.075	67	10	0	3	69	1103	1169	2.03e-14	77	KAG6393744.1	84	57	57	0	85.07	1	1	CAGAAGAGATTCTTGGGCTGAAAGCCATGTTTAGAAATATGGACACCGACAAAAGCGGCACCATCAC	CAGAGGAAATACATGGTCTGAAAGCAATGTTCACAAATATGGACACTGACAAAAGTGGCACCATCAC	69	1551	KAG6393744.1	calcium-dependent protein kinase [EC:2.7.11.1]	K13412
1107	KAG6404196.1	84.286	70	9	2	1	69	3065	3133	3.01e-12	70.7	KAG6404196.1	77	59	59	2	84.29	1	1	TGCAGAAGAGCGAAGCCGGACGAGGCGGGAA-TTTGAAGCAAGTGCAGAAGGTGTGTATGCCGTTCTTGA	TGCAGAAGAGTGAAGTTGGCC-AGTCGGGAAATTTCAAGCAAATACAGAAGCTGTGTATGCCGTTCTTGA	69	3381	KAG6404196.1	leucyl-tRNA synthetase [EC:6.1.1.4]	K01869
1107	KAG6404203.1	84.286	70	9	2	1	69	3140	3208	3.01e-12	70.7	KAG6404203.1	77	59	59	2	84.29	1	1	TGCAGAAGAGCGAAGCCGGACGAGGCGGGAA-TTTGAAGCAAGTGCAGAAGGTGTGTATGCCGTTCTTGA	TGCAGAAGAGTGAAGTTGGCC-AGTCGGGAAATTTCAAGCAAATACAGAAGCTGTGTATGCCGTTCTTGA	69	3456	KAG6404203.1	leucyl-tRNA synthetase [EC:6.1.1.4]	K01869
1108	KAG6409670.1	86.364	66	9	0	1	66	192	257	5.82e-15	79.7	KAG6409670.1	87	57	57	0	86.36	1	1	TGCAGAAGAGCTCTCCCCCTCAAGAAAAAGAAAATCCGACCAACTCGACAACTCCGGCCACATTTT	TGCAGAAGACCTCCTCGCCTCGAGGAAAAGAAAGTCCGACCAACTCGAAAACTCAGGCCACATTTT	69	762	KAG6409670.1	Hypothetical protein	Uncharacterized protein
1112	KAG6410341.1	83.582	67	11	0	1	67	1214	1280	8.63e-13	72.5	KAG6410341.1	79	56	56	0	83.58	1	1	TGCAGAAGAGCTTCCGCCTCACGAGCGAGCAAGTGGAAGCTTCTAGAATGACGCTGCATAGGTTTGG	TGCAGAAGAGCCTCCGCCTGACAAACGAGCAGGTGGAGGCGTCCAGGATGACTCTGCATAGGTTCGG	69	1503	KAG6410341.1	3-ketoacyl-CoA synthase [EC:2.3.1.199]	K15397
1112	KAG6412931.1	83.582	67	11	0	1	67	1214	1280	8.63e-13	72.5	KAG6412931.1	79	56	56	0	83.58	1	1	TGCAGAAGAGCTTCCGCCTCACGAGCGAGCAAGTGGAAGCTTCTAGAATGACGCTGCATAGGTTTGG	TGCAGAAGAGCCTCCGCCTGACAAACGAGCAGGTGGAGGCGTCGAGGATGACGCTGCATAGATTCGG	69	1503	KAG6412931.1	3-ketoacyl-CoA synthase [EC:2.3.1.199]	K15397
1112	KAG6412933.1	82.09	67	12	0	1	67	962	1028	1.05e-11	68	KAG6412933.1	74	55	55	0	82.09	1	1	TGCAGAAGAGCTTCCGCCTCACGAGCGAGCAAGTGGAAGCTTCTAGAATGACGCTGCATAGGTTTGG	TGCAGAAGAATCTCCGCCTGACAAACGAGCAGGTGGAAGCATCGAGGATGACGCTGCATAGATTCGG	69	1251	KAG6412933.1	Hypothetical protein	Uncharacterized protein
1114	KAG6435763.1	85.938	64	9	0	5	68	61	124	7.08e-14	76.1	KAG6435763.1	83	55	55	0	85.94	1	1	GAAGAGGAAAGGAGCGAAACCCATGAGAGTTTTGTGGAGCGGAAACACCAATTTCCCGAGATGG	GAAGAGGAAAGAAGTGAAACCCATGAGAATTTCGTAGAGCGTAAACACCAATTTCCTGGAATGG	69	750	KAG6435763.1	Hypothetical protein	Uncharacterized protein
1116	KAG6401711.1	90.566	53	3	1	1	51	165	217	8.63e-13	71.6	KAG6401711.1	78	48	48	2	90.57	1	1	TGCAGAAGAGGAAGAAAGAGTCAAACATCCCACACCTGAAG--TAAGTTGATT	TGCAGAAGAGGAAGAAAGAGTCAAACATCCCAGACCTGAAGACTCAGTTTATT	69	3483	KAG6401711.1	Hypothetical protein	Uncharacterized protein
1116	KAG6403983.1	90.566	53	3	1	1	51	408	460	8.63e-13	71.6	KAG6403983.1	78	48	48	2	90.57	1	1	TGCAGAAGAGGAAGAAAGAGTCAAACATCCCACACCTGAAG--TAAGTTGATT	TGCAGAAGAGGAAGAAAGAGTCAAACATCCCAGACCTGAAGACTCAGTTTATT	69	3792	KAG6403983.1	Hypothetical protein	Uncharacterized protein
1117	KAG6386805.1	95.522	67	3	0	1	67	686	752	1.2e-23	108	KAG6386805.1	119	64	64	0	95.52	1	1	TGCAGAAGAGGAAGGAGGTTGTGCATTGCGTTACGCTTCATGAGATTGACGTTATCAACAGCAGGTA	TGCAGAAGAGGAAGGAAGTTGTGCATTGCGTTACGCTTCATGAGATTGATGTTATCAACAGCAGATA	69	1572	KAG6386805.1	Hypothetical protein	Uncharacterized protein
1117	KAG6384990.1	95.312	64	3	0	1	64	686	749	5.1e-22	103	KAG6384990.1	113	61	61	0	95.31	1	1	TGCAGAAGAGGAAGGAGGTTGTGCATTGCGTTACGCTTCATGAGATTGACGTTATCAACAGCAG	TGCAGAAGAGGAAGGAAGTTGTGCATTGCGTCACGCTTCATGAGATTGATGTTATCAACAGCAG	69	1539	KAG6384990.1	RuvB-like protein 2 [EC:3.6.4.12]	K11338
1117	KAG6401224.1	95.312	64	3	0	3	66	688	751	5.1e-22	103	KAG6401224.1	113	61	61	0	95.31	1	1	CAGAAGAGGAAGGAGGTTGTGCATTGCGTTACGCTTCATGAGATTGACGTTATCAACAGCAGGT	CAGAAGAGGAAGGAAGTTGTGCATTGTGTTACGCTTCATGAGATTGATGTTATCAACAGCAGGT	69	1413	KAG6401224.1	RuvB-like protein 2 [EC:3.6.4.12]	K11338
1118	KAG6391367.1	93.478	46	3	0	1	46	1995	1950	3.01e-12	70.7	KAG6391367.1	77	43	43	0	93.48	1	-1	TGCAGAAGAGGAGACACCTTTGCCTTCTGGCACAGCAGAAGAAACC	TGCAGAAGAAGAGACACCTTTGCCTTCTGGCACAGCAGAGGATACC	69	3006	KAG6391367.1	L-arabinokinase [EC:2.7.1.46]	K12446
1118	KAG6387862.1	91.304	46	4	0	1	46	1935	1890	3.67e-11	66.2	KAG6387862.1	72	42	42	0	91.3	1	-1	TGCAGAAGAGGAGACACCTTTGCCTTCTGGCACAGCAGAAGAAACC	TGCAGAAGAAGAGACACCTTTGCCTTCTGGTACAGCAGAGGATACC	69	3024	KAG6387862.1	L-arabinokinase [EC:2.7.1.46]	K12446
1118	KAG6389613.1	91.304	46	4	0	1	46	2010	1965	3.67e-11	66.2	KAG6389613.1	72	42	42	0	91.3	1	-1	TGCAGAAGAGGAGACACCTTTGCCTTCTGGCACAGCAGAAGAAACC	TGCAGAAGAAGAGACACCTTTGCCTTCTGGCACGGCAGAGGATACC	69	4569	KAG6389613.1	L-arabinokinase [EC:2.7.1.46]	K12446
1119	KAG6401194.1	80.263	76	6	2	1	69	818	745	3.01e-12	69.8	KAG6401194.1	76	61	61	9	80.26	1	-1	TGCAGAAGAGGAGCAGA-------AAAGTAAAGAAGCAAGAACCAAAAGATGCAAAGGGTCAAGAGATCTTACAAA	TGCAGAAGAGAAGCATATTTCAAAAAAGCAAAGAAGCATG--CCAAAAGAGCCAAAGGGTCAAGAGATCTTACAAA	69	1740	KAG6401194.1	4-alpha-glucanotransferase [EC:2.4.1.25]	K00705
1122	KAG6426742.1	86.364	66	9	0	1	66	768	833	5.82e-15	79.7	KAG6426742.1	87	57	57	0	86.36	1	1	TGCAGAAGAGGCTTCTTTTTTGCTTGAGGAATGTCTCAGGAAGCAGAAGACTAACACCCCCTCCCT	TGCAGATGAGGCTTCTTGTTTGCTCGAGGAGTTTTTCAGGAAGCAGAAGACTAGCATGCCCTCCCT	69	4383	KAG6426742.1	Hypothetical protein	Uncharacterized protein
1122	KAG6429287.1	85.075	67	10	0	1	67	711	777	2.03e-14	77	KAG6429287.1	84	57	57	0	85.07	1	1	TGCAGAAGAGGCTTCTTTTTTGCTTGAGGAATGTCTCAGGAAGCAGAAGACTAACACCCCCTCCCTG	TGCAGATGAGGCTTCTTGTTTGCTCGAGGAGTTTTCCAGGAAGCAGAAGACTAGCATGCCCTCCCTG	69	4323	KAG6429287.1	Hypothetical protein	Uncharacterized protein
1126	KAG6431720.1	85.507	69	10	0	1	69	1031	1099	1.67e-15	80.6	KAG6431720.1	88	59	59	0	85.51	1	1	TGCAGAAGAGGTACCGGATGATCGTGGAGGGGCTGGGCAAGGCCGGGATCGAGTGTTTGAGAGGGAATG	TGCGGAGGCGGTACCGGATGATCGTGGATGAGCTGGGCCGGGCCGGGATCGAGTGCTTGAAGGGGAATG	69	1341	KAG6431720.1	1-aminocyclopropane-1-carboxylate synthase [EC:4.4.1.14]	K01762
1126	KAG6428625.1	88.333	60	7	0	10	69	1040	1099	2.03e-14	77.9	KAG6428625.1	85	53	53	0	88.33	1	1	GGTACCGGATGATCGTGGAGGGGCTGGGCAAGGCCGGGATCGAGTGTTTGAGAGGGAATG	GGTACCGGATGATCGTGGACGGGCTGGACCGGGCCGGGATCGAGTGCTTGAAGGGGAATG	69	1347	KAG6428625.1	1-aminocyclopropane-1-carboxylate synthase [EC:4.4.1.14]	K01762
1127	KAG6407630.1	89.552	67	7	0	3	69	1009	1075	3.22e-18	90.6	KAG6407630.1	99	60	60	0	89.55	1	1	CAGAAGAGGTATAAAGAGGCTGCCCCTGCCACATTGGCCTTACTAGAACAATGCTGTAGTGAAGTAA	CAGAAGAGGTATAAGGAGGCTGCCCCTTCTACATTGGCCTTATTAGAACAACGTTGTAGTGAGGTAA	69	2466	KAG6407630.1	Hypothetical protein	Uncharacterized protein
1135	KAG6434291.1	91.304	69	6	0	1	69	657	725	6.21e-21	98.7	KAG6434291.1	108	63	63	0	91.3	1	1	TGCAGAAGAGTTTGTGCAGTATACTCATACCCGCGATGCTGTAGATGTAACATTTGGAGTGAAGGAGCT	TGCTGAAGAGTTTGTGCAGTATACTCATACTCGTGATCCTGTAGACGTAACATTTGGAGTGAGGGAGCT	69	1404	KAG6434291.1	cell cycle checkpoint control protein RAD9A [EC:3.1.11.2]	K10994
1135	KAG6437748.1	91.304	69	6	0	1	69	756	824	6.21e-21	98.7	KAG6437748.1	108	63	63	0	91.3	1	1	TGCAGAAGAGTTTGTGCAGTATACTCATACCCGCGATGCTGTAGATGTAACATTTGGAGTGAAGGAGCT	TGCAGAAGAGTTTGTGCAGTATACTCATACTCGTGATCCTGTAGACGTAACATTTGGAGTGAGAGAGCT	69	1395	KAG6437748.1	cell cycle checkpoint control protein RAD9A [EC:3.1.11.2]	K10994
1136	KAG6436156.1	88.406	69	8	0	1	69	1598	1530	3.22e-18	89.7	KAG6436156.1	98	61	61	0	88.41	1	-1	TGCAGAAGATAAACGTCCCTAGACGAAAAAGCATCCTCGTGAATAAGCGAGTGTCCTTCCAGACGAACA	TGTAGAAGATGAACGTCCCTGGATGAAAAAGCATCCTCATGAGTAAGCGAGTGGCCTTCCAAACGAACA	69	2448	KAG6436156.1	homeobox-leucine zipper protein	K09338
1144	KAG6432223.1	85.484	62	9	0	5	66	542	481	8.63e-13	72.5	KAG6432223.1	79	53	53	0	85.48	1	-1	GAAGATAGCATACATAGAAGAGACTCCCATTGGTTTCTCCCGATAGAGTCGCCTGCAAATAC	GAAGACAGCATGCATAGCAGAGACTCCCACTGGTTTCTTCCAATCGAGTCTCCTGCAAACAC	69	2862	KAG6432223.1	NEDD8-activating enzyme E1 [EC:6.2.1.64]	K10686
1144	KAG6435524.1	83.871	62	10	0	5	66	542	481	1.05e-11	68	KAG6435524.1	74	52	52	0	83.87	1	-1	GAAGATAGCATACATAGAAGAGACTCCCATTGGTTTCTCCCGATAGAGTCGCCTGCAAATAC	GAAGACAGCATGCATAGCAGAGACTCCCACTGGTTTCTTCCAATCGAGTCTCCTGCGAACAC	69	1350	KAG6435524.1	Hypothetical protein	Uncharacterized protein
1151	KAG6408460.1	91.837	49	4	0	21	69	433	385	8.63e-13	71.6	KAG6408460.1	78	45	45	0	91.84	1	-1	CCGTGCTTCCCCATCGATCCCTCGCATCAATATTGGCCTTCCTACTCAG	CCGTGCTGCCCCATCGATCCCGAGCATCAATATTGGCCTTCCTGCTCAG	69	1428	KAG6408460.1	Hypothetical protein	Uncharacterized protein
1151	KAG6408439.1	91.837	49	4	0	21	69	433	385	8.63e-13	71.6	KAG6408439.1	78	45	45	0	91.84	1	-1	CCGTGCTTCCCCATCGATCCCTCGCATCAATATTGGCCTTCCTACTCAG	CCGTGCTGCCCCATCGATCCCGAGCATCAATATTGGCCTTCCTGCTCAG	69	1428	KAG6408439.1	Hypothetical protein	Uncharacterized protein
1151	KAG6422892.1	91.837	49	4	0	21	69	376	328	8.63e-13	71.6	KAG6422892.1	78	45	45	0	91.84	1	-1	CCGTGCTTCCCCATCGATCCCTCGCATCAATATTGGCCTTCCTACTCAG	CCGTGCTGCCCCATCGATCCCGAGCATCAATATTGGCCTTCCTGCTCAG	69	1374	KAG6422892.1	Hypothetical protein	Uncharacterized protein
1157	KAG6407002.1	94.03	67	4	0	3	69	1009	1075	1.46e-22	104	KAG6407002.1	114	63	63	0	94.03	1	1	CAGAAGATCTATCAAGCTAAGGCCGAGGCCGACTTTCTTGTCATGGAGAAGCTAGTCAAGAAAATAC	CAGAAGATCTATCAGGCTAAGGCTGAGGCCGATTTTCTTGTCATGGAGAAGCTCGTCAAGAAAATAC	69	1635	KAG6407002.1	NEDD8-activating enzyme E1 regulatory subunit	K04532
1157	KAG6404804.1	92.537	67	5	0	3	69	991	1057	6.21e-21	99.6	KAG6404804.1	109	62	62	0	92.54	1	1	CAGAAGATCTATCAAGCTAAGGCCGAGGCCGACTTTCTTGTCATGGAGAAGCTAGTCAAGAAAATAC	CAGAAGATCTATCAGGCTAAGGCTGAGGCCGATTTTCTTGTCATGGAAAAGCTCGTCAAGAAAATAC	69	1617	KAG6404804.1	NEDD8-activating enzyme E1 regulatory subunit	K04532
1158	KAG6417291.1	91.071	56	5	0	2	57	715	770	5.82e-15	79.7	KAG6417291.1	87	51	51	0	91.07	1	1	GCAGAAGATCTCTATGGTATTTTTATAAATAGAGTACGTAGAGAGCGCCCGCCGGA	GCGGAAGATCTCTATGGAATTTTTATAAACAGAGTGCGTAGAGAGCGCCCACCGGA	69	1539	KAG6417291.1	Hypothetical protein	Uncharacterized protein
1158	KAG6414771.1	90.909	55	5	0	2	56	655	709	2.03e-14	77.9	KAG6414771.1	85	50	50	0	90.91	1	1	GCAGAAGATCTCTATGGTATTTTTATAAATAGAGTACGTAGAGAGCGCCCGCCGG	GCAGAAGATCTCTATGGCATTTTTATAAACAGAGTGCGCAGAGAGCGCCCACCGG	69	1563	KAG6414771.1	Hypothetical protein	Uncharacterized protein
1159	KAG6435894.1	92.754	69	5	0	1	69	69	137	5.1e-22	103	KAG6435894.1	113	64	64	0	92.75	1	1	TGCAGAAGATGAAAAACTTCGGCAGCTCGTCCAGAAATATGGCCCTCAAAACTGGAATTCGATTGCTGA	TGCAGAAGATGAAAAACTCCGGCAGCTCGTCGAAAAATATGGCCCTCAAAATTGGAATTCCATTGCTGA	69	708	KAG6435894.1	transcription factor MYB, plant	K09422
1159	KAG6390466.1	89.855	69	7	0	1	69	69	137	2.64e-19	94.2	KAG6390466.1	103	62	62	0	89.86	1	1	TGCAGAAGATGAAAAACTTCGGCAGCTCGTCCAGAAATATGGCCCTCAAAACTGGAATTCGATTGCTGA	TGCAGAAGACGAAAAACTCCGACAGCTCGTCGAAAAATATGGCCCTCAAAATTGGAATTCCATTGCTGA	69	861	KAG6390466.1	transcription factor MYB, plant	K09422
1159	KAG6388612.1	88.406	69	8	0	1	69	69	137	3.22e-18	89.7	KAG6388612.1	98	61	61	0	88.41	1	1	TGCAGAAGATGAAAAACTTCGGCAGCTCGTCCAGAAATATGGCCCTCAAAACTGGAATTCGATTGCTGA	TGCAGAAGACGAAAAACTCCGACAGATCGTCGAAAAATATGGCCCTCAAAATTGGAATTCCATTGCTGA	69	858	KAG6388612.1	transcription factor MYB, plant	K09422
1163	KAG6404869.1	98.361	61	1	0	9	69	1	61	4.18e-23	106	KAG6404869.1	117	60	60	0	98.36	1	1	ATGAGTTACTTCAACAGAGTGTGGATGGCCGCCAGCGTCGCCGTCGTCAACGGCCACTCCG	ATGAGCTACTTCAACAGAGTGTGGATGGCCGCCAGCGTCGCCGTCGTCAACGGCCACTCCG	69	267	KAG6404869.1	Hypothetical protein	Uncharacterized protein
1163	KAG6416916.1	93.443	61	4	0	9	69	1	61	2.64e-19	93.3	KAG6416916.1	102	57	57	0	93.44	1	1	ATGAGTTACTTCAACAGAGTGTGGATGGCCGCCAGCGTCGCCGTCGTCAACGGCCACTCCG	ATGAGTTACATGAACAGGGTGTGGATGGCCGCCAGCGTGGCCGTCGTCAACGGCCACTCCG	69	336	KAG6416916.1	Hypothetical protein	Uncharacterized protein
1163	KAG6419515.1	91.803	61	5	0	9	69	1	61	1.12e-17	88.7	KAG6419515.1	97	56	56	0	91.8	1	1	ATGAGTTACTTCAACAGAGTGTGGATGGCCGCCAGCGTCGCCGTCGTCAACGGCCACTCCG	ATGAGTTACATGAACAGAATGTGGATGGCCGCCAGCGTCTCCTTCGTCAACGGCCACTCCG	69	264	KAG6419515.1	Hypothetical protein	Uncharacterized protein
1166	KAG6420220.1	89.855	69	7	0	1	69	219	287	2.64e-19	94.2	KAG6420220.1	103	62	62	0	89.86	1	1	TGCAGAAGATGCAGATAAAGAAAAGGAAAAAGACCTGTTAGCCCAGATTGAGAAGCTTCAGTGTCAAAA	TGCAGAAGATGCATACAAAGAAAAGGAAAAAGACCTGCTGGTCCAGATTAAGAAGCTCCAGTGTCAAAA	69	2007	KAG6420220.1	splicing factor 4	K13096
1166	KAG6423244.1	88.406	69	8	0	1	69	219	287	3.22e-18	89.7	KAG6423244.1	98	61	61	0	88.41	1	1	TGCAGAAGATGCAGATAAAGAAAAGGAAAAAGACCTGTTAGCCCAGATTGAGAAGCTTCAGTGTCAAAA	TGCAGAAGATGCATACAAAGAAAAGGAAAAAGACCTGCTGCTCCAGATTAAGAAGCTCCAGTGTCAAAA	69	2007	KAG6423244.1	splicing factor 4	K13096
1166	KAG6395050.1	91.803	61	5	0	1	61	174	234	1.12e-17	88.7	KAG6395050.1	97	56	56	0	91.8	1	1	TGCAGAAGATGCAGATAAAGAAAAGGAAAAAGACCTGTTAGCCCAGATTGAGAAGCTTCAG	TGCAGAAGATGCATACAAAGAAAAGGAAAAAGACCTGCTACTCCAGATTGAGAAGCTTCAG	69	1119	KAG6395050.1	Hypothetical protein	Uncharacterized protein
1172	KAG6417023.1	85.507	69	10	0	1	69	101	33	1.67e-15	80.6	KAG6417023.1	88	59	59	0	85.51	1	-1	TGCAGAAGATGCCGGCCGGAGCTGGAGGCGAGATGTCTCTTGATCTTCTCCAAGCTCGTCTTCGTATCA	TGAAGGAGTTGTCGGCCGGAGCTCGAGGCGAGCTGCCTTTTGATCTTCTCCAAGCTTGTCTGCGTATCA	69	1371	KAG6417023.1	Hypothetical protein	Uncharacterized protein
1172	KAG6419625.1	85.507	69	10	0	1	69	101	33	1.67e-15	80.6	KAG6419625.1	88	59	59	0	85.51	1	-1	TGCAGAAGATGCCGGCCGGAGCTGGAGGCGAGATGTCTCTTGATCTTCTCCAAGCTCGTCTTCGTATCA	TGAAGGAGTTGTCGGCCGGAGCTCGAGGCGAGCTGCCTTTTGATCTTCTCCAAGCTTGTCTGCGTATCA	69	1458	KAG6419625.1	Hypothetical protein	Uncharacterized protein
1173	KAG6386492.1	94.34	53	3	0	1	53	332	384	4.77e-16	83.3	KAG6386492.1	91	50	50	0	94.34	1	1	TGCAGAAGATGCCTATTATTGGTTGGTTATTCCAGCAACCTTTTGTGAGATCG	TGCAGAAGATGCCTATTATTGGATGGCTATTCCAACAACCTTTTGTGAGATCG	69	435	KAG6386492.1	Hypothetical protein	Uncharacterized protein
1173	KAG6401280.1	94.34	53	3	0	1	53	251	303	4.77e-16	83.3	KAG6401280.1	91	50	50	0	94.34	1	1	TGCAGAAGATGCCTATTATTGGTTGGTTATTCCAGCAACCTTTTGTGAGATCG	TGCAGAAGATGCCTATTATCGGATGGTTGTTCCAGCAACCTTTTGTGAGATCG	69	369	KAG6401280.1	Hypothetical protein	Uncharacterized protein
1173	KAG6411877.1	94.34	53	3	0	1	53	332	384	4.77e-16	83.3	KAG6411877.1	91	50	50	0	94.34	1	1	TGCAGAAGATGCCTATTATTGGTTGGTTATTCCAGCAACCTTTTGTGAGATCG	TGCAGAAGATGCCTATTATTGGATGGCTATTCCAACAACCTTTTGTGAGATCG	69	435	KAG6411877.1	Hypothetical protein	Uncharacterized protein
1175	KAG6430118.1	88.06	67	8	0	1	67	1992	2058	3.92e-17	86	KAG6430118.1	94	59	59	0	88.06	1	1	TGCAGAAGATGGCCTGTCAGCTGTAAAACACCAATACAAGAAAAAGTATAGGTCAAAAGTTGGTTTA	TGCAGAAGATGGCCTGTCAGCAATAAAACACAAATACAAGAAAAAATATAGATTGAGAGTTGGTTTA	69	3885	KAG6430118.1	DnaJ homolog subfamily C member 7	K09527
1175	KAG6427106.1	87.879	66	8	0	1	66	1998	2063	1.37e-16	84.2	KAG6427106.1	92	58	58	0	87.88	1	1	TGCAGAAGATGGCCTGTCAGCTGTAAAACACCAATACAAGAAAAAGTATAGGTCAAAAGTTGGTTT	TGCAGAAGATGGCCTGTCAGCAATAAAACGCAAATACAAGAAAAAATATAGATTGAAAGTTGGTTT	69	3864	KAG6427106.1	Hypothetical protein	Uncharacterized protein
1184	KAG6416424.1	88.406	69	8	0	1	69	1241	1309	3.22e-18	89.7	KAG6416424.1	98	61	61	0	88.41	1	1	TGCAGAAGATTGGGGCAAAGAAAATACCAGAACACATTAGATGTCACAAGCAGACTGATTTGGAAAAGG	TGCAAAAGATTGGGGCAAAGAAAATACCAGAAAATTTAAGAAGTCGTAAGCAGACTGATTTGGAAAAGG	69	2352	KAG6416424.1	origin recognition complex subunit 1	K02603
1184	KAG6428651.1	88.406	69	8	0	1	69	1241	1309	3.22e-18	89.7	KAG6428651.1	98	61	61	0	88.41	1	1	TGCAGAAGATTGGGGCAAAGAAAATACCAGAACACATTAGATGTCACAAGCAGACTGATTTGGAAAAGG	TGCAAAAGATTGGGGCAAAGAAAATACCAGAAAATTTAAGAAGTCGTAAGCAGACTGATTTGGAAAAGG	69	2508	KAG6428651.1	origin recognition complex subunit 1	K02603
1184	KAG6431746.1	88.406	69	8	0	1	69	1241	1309	3.22e-18	89.7	KAG6431746.1	98	61	61	0	88.41	1	1	TGCAGAAGATTGGGGCAAAGAAAATACCAGAACACATTAGATGTCACAAGCAGACTGATTTGGAAAAGG	TGCAAAAGATTGGGGCAAAGAAAATACCAGAAAATTTAAGAAGTCGTAAGCAGACTGATTTGGAAAAGG	69	5289	KAG6431746.1	origin recognition complex subunit 1	K02603
1186	KAG6412463.1	82.09	67	12	0	1	67	266	332	1.05e-11	68	KAG6412463.1	74	55	55	0	82.09	1	1	TGCAGAAGATTGTGTGGTATTTGAGGTTCGGTAATTTGTCGTTACGGAGAAATGCAGTTTTAGCGCT	TGCAGAAGTTGGTGTGGTTTATGAGATTCGGCAGTTTGTCTATTCGGAGAAATGCAGTGTTGGCGCT	69	915	KAG6412463.1	Hypothetical protein	Uncharacterized protein
1194	KAG6433658.1	87.879	66	8	0	4	69	135	200	1.37e-16	84.2	KAG6433658.1	92	58	58	0	87.88	1	1	AGAAGCAAATCTGCTGTTTGTGGAGTCTCCAGTTGGAGTTGGATTCTCCTACACCAACACTTCTTC	AGAAGCAAATGTGATATTTGTGGAATCTCCAATTGGGGTGGGATTCTCCTACACCAACACTTCCTC	69	753	KAG6433658.1	Hypothetical protein	Uncharacterized protein
1194	KAG6436984.1	84.848	66	10	0	4	69	225	290	7.08e-14	75.2	KAG6436984.1	82	56	56	0	84.85	1	1	AGAAGCAAATCTGCTGTTTGTGGAGTCTCCAGTTGGAGTTGGATTCTCCTACACCAACACTTCTTC	AGAAGCAAATGTGATATTTGTGGAATCTCCAATCGGGGTGGGATTCTCCTACACCAATACTTCCTC	69	1299	KAG6436984.1	serine carboxypeptidase-like clade II [EC:3.4.16.-]	K16297
1195	KAG6428676.1	86.957	69	9	0	1	69	1320	1388	1.37e-16	85.1	KAG6428676.1	93	60	60	0	86.96	1	1	TGCAGAAGCAAATGTACTCCTAAAGCACCATGATGGCATAGGTGCACTAACTTTAGTTGGAGGGACACG	TGCTGAGGCAAATGTACTCCTCAAGCACCATGACGGCTTAGGTGTGCTAACGTTAGTTGGAGGGACGCG	69	2466	KAG6428676.1	Hypothetical protein	Uncharacterized protein
1195	KAG6431770.1	86.957	69	9	0	1	69	1320	1388	1.37e-16	85.1	KAG6431770.1	93	60	60	0	86.96	1	1	TGCAGAAGCAAATGTACTCCTAAAGCACCATGATGGCATAGGTGCACTAACTTTAGTTGGAGGGACACG	TGCTGAGGCAAATGTACTCCTCAAGCACCATGACGGCTTAGGTGTGCTAACGTTAGTTGGAGGGACGCG	69	2451	KAG6431770.1	Hypothetical protein	Uncharacterized protein
1197	KAG6437979.1	86.957	69	9	0	1	69	650	582	1.37e-16	85.1	KAG6437979.1	93	60	60	0	86.96	1	-1	TGCAGAAGCAACGACGAAGTAGACAACTGCTTCTGCCTCGAGGAAATTGAGGACAGACAGCTGAAACTA	TGTAGTAGCAAAGACGATGTGGAAAGCTGCTTCTGCCTTGAGGAAATTGAGGACAGACAGCTGAAAGTA	69	723	KAG6437979.1	Hypothetical protein	Uncharacterized protein
1197	KAG6434625.1	84.058	69	11	0	1	69	728	660	7.08e-14	76.1	KAG6434625.1	83	58	58	0	84.06	1	-1	TGCAGAAGCAACGACGAAGTAGACAACTGCTTCTGCCTCGAGGAAATTGAGGACAGACAGCTGAAACTA	TGTAGTAGCAAAGACGATGTGGAAAGCTGCTTCTGCCTTGAGGAAATCGAGGAAAGACAGCTGAAAGTA	69	801	KAG6434625.1	deubiquitinase DESI2 [EC:3.4.19.12]	K22763
1198	KAG6433663.1	94.118	68	4	0	1	68	662	595	4.18e-23	105	KAG6433663.1	116	64	64	0	94.12	1	-1	TGCAGAAGCAACTCGATACAACCCTTTGGGGTACAAGGAATAAATAGTGGCTCCATTCCTTGCATGGC	TGCAGAAGCAACTCAATACAACCCTTTGGGGTGCAAGGAATAAACAGTGGCTCCATTCCTTGCATTGC	69	1095	KAG6433663.1	Hypothetical protein	Uncharacterized protein
1203	KAG6409349.1	89.855	69	7	0	1	69	122	54	2.64e-19	94.2	KAG6409349.1	103	62	62	0	89.86	1	-1	TGCAGAAGCAAGTCCTCAGCTTGAGAGGGAGACGTCGAGCACAAATGAAGCCGTAGCTGCATGGCTTTC	TGCAGAAGCAAGTCCTCGGCCTCAGAGGGAGACGTCGAGCAGAGATGAAACCGGAGCTGCATGGCTTTC	69	1017	KAG6409349.1	Hypothetical protein	Uncharacterized protein
1210	KAG6431437.1	91.045	67	6	0	3	69	910	976	7.56e-20	95.1	KAG6431437.1	104	61	61	0	91.04	1	1	CAGAAGCACAAGGGAGGAATTCCTAATGTATTTGCTGGAAAGCTACAAAATGTTTCTATGCCTGGAT	CAGAAACACAAGGGGGGAATTCCCAATGTATTTGCTGGAAAGCTACAGAATATTTCTATGCCTGCAT	69	1788	KAG6431437.1	U3 small nucleolar RNA-associated protein 5	K14546
1210	KAG6428347.1	89.552	67	7	0	3	69	910	976	3.22e-18	90.6	KAG6428347.1	99	60	60	0	89.55	1	1	CAGAAGCACAAGGGAGGAATTCCTAATGTATTTGCTGGAAAGCTACAAAATGTTTCTATGCCTGGAT	CAGAAACACAAGGGGGGGATTCCCAATGTATTTGCTGGAAAGCTACAAAATATTTCCATGCCTGCAT	69	1854	KAG6428347.1	U3 small nucleolar RNA-associated protein 5	K14546
1211	KAG6411023.1	89.855	69	7	0	1	69	572	640	2.64e-19	94.2	KAG6411023.1	103	62	62	0	89.86	1	1	TGCAGAAGCACATTGGCAATATTCTCTCTCTCTTGGCAGATCCCACAGAAGGGGAAGATGACGAATCTC	TGCAGAAGCACATTGGCAATATTCTTTCTCTATTGGCAGATTCCACAGAAGGGGAAGGCGATGATTCTC	69	2007	KAG6411023.1	TBCC domain-containing protein 1	K16810
1211	KAG6397265.1	88.406	69	8	0	1	69	557	625	3.22e-18	89.7	KAG6397265.1	98	61	61	0	88.41	1	1	TGCAGAAGCACATTGGCAATATTCTCTCTCTCTTGGCAGATCCCACAGAAGGGGAAGATGACGAATCTC	TGCATAAGCACATTGGCAATATTCTTTCTCTCTTGGCAGATTCCAGTGAAGGGGAAGGTGATGACTCTC	69	1758	KAG6397265.1	TBCC domain-containing protein 1	K16810
1211	KAG6399523.1	88.406	69	8	0	1	69	134	202	3.22e-18	89.7	KAG6399523.1	98	61	61	0	88.41	1	1	TGCAGAAGCACATTGGCAATATTCTCTCTCTCTTGGCAGATCCCACAGAAGGGGAAGATGACGAATCTC	TGCATAAGCACATTGGCAATATTCTCTCTCTTTTGGCAGATTCCAGTGAAGGGGAAGGTGATGACTCTC	69	1077	KAG6399523.1	Hypothetical protein	Uncharacterized protein
1215	KAG6383273.1	88.525	61	7	0	6	66	428	488	5.82e-15	79.7	KAG6383273.1	87	54	54	0	88.52	1	1	AAGCAGAGAAAGTGGTAGGCTGGGCCAAAAATCATTACCTATCCTCATGTGCTATTCCTTC	AAGCAGAGAAGGTGGTTGGCTGGGCCAGAAGTCATTACCTATCCTCATGTCCCCTTCCTTC	69	1542	KAG6383273.1	Hypothetical protein	Uncharacterized protein
1215	KAG6386179.1	88.525	61	7	0	6	66	2018	2078	5.82e-15	79.7	KAG6386179.1	87	54	54	0	88.52	1	1	AAGCAGAGAAAGTGGTAGGCTGGGCCAAAAATCATTACCTATCCTCATGTGCTATTCCTTC	AAGCAGAGAAGGTGGTTGGCTGGGCCAGAAGTCATTACCTATCCTCATGTCCCCTTCCTTC	69	3132	KAG6386179.1	Hypothetical protein	Uncharacterized protein
1215	KAG6401665.1	86.885	61	8	0	6	66	2007	2067	7.08e-14	75.2	KAG6401665.1	82	53	53	0	86.89	1	1	AAGCAGAGAAAGTGGTAGGCTGGGCCAAAAATCATTACCTATCCTCATGTGCTATTCCTTC	AAGCAGAGAAGGTGGTTGGCTGGGCCAGAAGTCATTACCTATCCTCATGTCTCCTTCCTTC	69	3234	KAG6401665.1	Hypothetical protein	Uncharacterized protein
1217	KAG6399794.1	89.706	68	7	0	2	69	663	730	9.22e-19	92.4	KAG6399794.1	101	61	61	0	89.71	1	1	GCAGAAGCAGATAGATGCCAAGATCAATGACATCGTAGTAAAAGGCTGGCCAATCCTAAGGGAGATCT	GCAGAGGCAGATTAATGCCAAGATCAATAACATCGTAAGAAAAGGCTGGCCAATGCTAAGGGAGATCT	69	732	KAG6399794.1	peptide-methionine (S)-S-oxide reductase [EC:1.8.4.11]	K07304
1217	KAG6397584.1	88.406	69	8	0	1	69	668	736	3.22e-18	89.7	KAG6397584.1	98	61	61	0	88.41	1	1	TGCAGAAGCAGATAGATGCCAAGATCAATGACATCGTAGTAAAAGGCTGGCCAATCCTAAGGGAGATCT	TGCAGGGGCAGATTAATGCCAAGATCAATAACATCGTAAGAAAAGGCTGGCCAATGCTAAGGGAGATCT	69	738	KAG6397584.1	peptide-methionine (S)-S-oxide reductase [EC:1.8.4.11]	K07304
1218	KAG6382420.1	91.304	69	6	0	1	69	960	1028	6.21e-21	98.7	KAG6382420.1	108	63	63	0	91.3	1	1	TGCAGAAGCAGATCAGCTGTTGGAGAAGGTTGGCTATGTGCAAACACACGGCTACATATGGATCCCTCC	TGCAGAAGCAGATCAACTGTTGGAAAAGGTGGGTTACGTTCAAACACACGGCTACATATGGATCCCTCC	69	1038	KAG6382420.1	Hypothetical protein	Uncharacterized protein
1218	KAG6412778.1	91.304	69	6	0	1	69	1464	1532	6.21e-21	98.7	KAG6412778.1	108	63	63	0	91.3	1	1	TGCAGAAGCAGATCAGCTGTTGGAGAAGGTTGGCTATGTGCAAACACACGGCTACATATGGATCCCTCC	TGCAGAAGCAGATCAACTGTTGGAAAAGGTGGGTTACGTTCAAACACACGGCTACATATGGATCCCTCC	69	1542	KAG6412778.1	glucose-6-phosphate 1-dehydrogenase [EC:1.1.1.49 1.1.1.363]	K00036
1218	KAG6382694.1	89.855	69	7	0	1	69	1290	1358	2.64e-19	94.2	KAG6382694.1	103	62	62	0	89.86	1	1	TGCAGAAGCAGATCAGCTGTTGGAGAAGGTTGGCTATGTGCAAACACACGGCTACATATGGATCCCTCC	TGCAGAAGCAGATCAACTGCTGGAGAAGGTGGGTTACGTTCAGACACACGGCTACATATGGATCCCTCC	69	1368	KAG6382694.1	Hypothetical protein	Uncharacterized protein
1219	KAG6393603.1	92.754	69	5	0	1	69	365	297	5.1e-22	103	KAG6393603.1	113	64	64	0	92.75	1	-1	TGCAGAAGCAGATCGCCGTCCCTATCCTCCACCAAAATCTCCGTCAATCTCCGCGTAACCGACCGACTC	TGCAGCAGCAGATCGGCATCCCTATCCTCCACCAAAATCTCCGTCAATCTCCGCGTAACCGATCGATTC	69	2172	KAG6393603.1	Hypothetical protein	Uncharacterized protein
1219	KAG6395429.1	92.754	69	5	0	1	69	203	135	5.1e-22	103	KAG6395429.1	113	64	64	0	92.75	1	-1	TGCAGAAGCAGATCGCCGTCCCTATCCTCCACCAAAATCTCCGTCAATCTCCGCGTAACCGACCGACTC	TGGAGAAGCAGATCGGCATCCCTATCCTCCACCAAAATCTCCGTCAATCTCCGCGTAACCGATCGATTC	69	480	KAG6395429.1	Hypothetical protein	Uncharacterized protein
1219	KAG6436626.1	89.855	69	7	0	1	69	200	132	2.64e-19	94.2	KAG6436626.1	103	62	62	0	89.86	1	-1	TGCAGAAGCAGATCGCCGTCCCTATCCTCCACCAAAATCTCCGTCAATCTCCGCGTAACCGACCGACTC	TGTAGAAGCAGATCGGCATCCCTATCCTCCACCAAAATATCTGTCAACCTCCGCGTAACCGACCGATTC	69	477	KAG6436626.1	Hypothetical protein	Uncharacterized protein
1221	KAG6392631.1	95.652	69	3	0	1	69	555	487	9.84e-25	112	KAG6392631.1	123	66	66	0	95.65	1	-1	TGCAGAAGCAGCACTACCATCAGAACCTTCCAAAGCATTGTGAAGCATGCGAAGAGCCTCTTGTCTCAC	TGCAGAAGCAGCACTACCATCAGATCCCTCCAAAGCATTGTGAAGCATGCGCAGAGCCTCTTGTCTCAC	69	5448	KAG6392631.1	Hypothetical protein	Uncharacterized protein
1221	KAG6394389.1	94.203	69	4	0	1	69	555	487	1.2e-23	107	KAG6394389.1	118	65	65	0	94.2	1	-1	TGCAGAAGCAGCACTACCATCAGAACCTTCCAAAGCATTGTGAAGCATGCGAAGAGCCTCTTGTCTCAC	TGCAGAAGCAGCACTACCATCAGATCCCTCCAAAGCATTGTGAAGCATGCGCAGAGCCTCTTGCCTCAC	69	6897	KAG6394389.1	Hypothetical protein	Uncharacterized protein
1225	KAG6386249.1	88.406	69	8	0	1	69	179	111	3.22e-18	89.7	KAG6386249.1	98	61	61	0	88.41	1	-1	TGCAGAAGCAGCGCCTTCTCCACCAGCTCCGACAGCTCGGTGTAGTGTGAATCGAGGAGAGCGACGAGG	TGCAGCAGGAGAGCCTTCTCCACGAGCTCAGAGAGCTCGGTGTAGTGGGAATCGAGGAGAGCTACGAGG	69	1362	KAG6386249.1	Hypothetical protein	Uncharacterized protein
1225	KAG6401631.1	88.406	69	8	0	1	69	185	117	3.22e-18	89.7	KAG6401631.1	98	61	61	0	88.41	1	-1	TGCAGAAGCAGCGCCTTCTCCACCAGCTCCGACAGCTCGGTGTAGTGTGAATCGAGGAGAGCGACGAGG	TGAAGCAGCAGCGCCTTCTCGACGAGCTCCGAGAGCTCGGTGTAATGCGAATCGAGGAGAGCTACGAGG	69	1356	KAG6401631.1	Hypothetical protein	Uncharacterized protein
1225	KAG6412126.1	88.406	69	8	0	1	69	188	120	3.22e-18	89.7	KAG6412126.1	98	61	61	0	88.41	1	-1	TGCAGAAGCAGCGCCTTCTCCACCAGCTCCGACAGCTCGGTGTAGTGTGAATCGAGGAGAGCGACGAGG	TGCAGCAGGAGAGCCTTCTCCACGAGCTCAGAGAGCTCGGTGTAGTGGGAATCGAGGAGAGCTACGAGG	69	1314	KAG6412126.1	Hypothetical protein	Uncharacterized protein
1228	KAG6416279.1	94.203	69	4	0	1	69	383	451	1.2e-23	107	KAG6416279.1	118	65	65	0	94.2	1	1	TGCAGAAGCAGGAGGAGAACATGTTACAGCAGGTCACTCAAAGAGCAAAAGATCTTCATGAGAAAGAGT	TGCATAAGCAGGAGGAGAACATGTTACAGGAGGTCACTGAAAGAGCAAAAGATCTTCATGACAAAGAGT	69	615	KAG6416279.1	Hypothetical protein	Uncharacterized protein
1228	KAG6418812.1	94.203	69	4	0	1	69	416	484	1.2e-23	107	KAG6418812.1	118	65	65	0	94.2	1	1	TGCAGAAGCAGGAGGAGAACATGTTACAGCAGGTCACTCAAAGAGCAAAAGATCTTCATGAGAAAGAGT	TGCATAAGCAGGAGGAGAACATGTTACAGGAGGTCACTGAAAGAGCAAAAGATCTTCATGACAAAGAGT	69	648	KAG6418812.1	Hypothetical protein	Uncharacterized protein
1228	KAG6431810.1	87.5	64	8	0	6	69	415	478	1.67e-15	80.6	KAG6431810.1	88	56	56	0	87.5	1	1	AAGCAGGAGGAGAACATGTTACAGCAGGTCACTCAAAGAGCAAAAGATCTTCATGAGAAAGAGT	AAGAATGAGGAGAACATGTTGCAGGAGGTCACTGAAAGAGCAAAGGGTCTTCATGATAAAGAGT	69	642	KAG6431810.1	Hypothetical protein	Uncharacterized protein
1229	KAG6413080.1	82.609	69	12	0	1	69	501	433	8.63e-13	71.6	KAG6413080.1	78	57	57	0	82.61	1	-1	TGCAGAAGCAGGCACTTGTGATGAACGATTACGCCAGTCCCGATTATCTAGCTCAGAAAATCGGTTCTG	TGCAGGAGCAGGCAACTGTGTAGAACGATTACGCCAGTCACGGTTGTCCAGCTCAGAGAAACGGCTCTG	69	2424	KAG6413080.1	translation initiation factor 4G	K03260
1229	KAG6421213.1	82.09	67	12	0	1	67	435	369	1.05e-11	68	KAG6421213.1	74	55	55	0	82.09	1	-1	TGCAGAAGCAGGCACTTGTGATGAACGATTACGCCAGTCCCGATTATCTAGCTCAGAAAATCGGTTC	TGCAGGAGCAGGCAACTGTGTAGAACGATTACGCCAGTCACGGTTGTCCAGCTCAGAGAAACGGATC	69	2334	KAG6421213.1	translation initiation factor 4G	K03260
1229	KAG6410506.1	81.159	69	13	0	1	69	408	340	3.67e-11	67.1	KAG6410506.1	73	56	56	0	81.16	1	-1	TGCAGAAGCAGGCACTTGTGATGAACGATTACGCCAGTCCCGATTATCTAGCTCAGAAAATCGGTTCTG	TGCAGGAGCAGGCAACTGTGTAGACCGATTACGCCAGTCACGGTTGTCCAGCTCAGAGAAACGGCTCTG	69	2331	KAG6410506.1	translation initiation factor 4G	K03260
1230	KAG6425903.1	88.71	62	7	0	1	62	326	387	1.67e-15	81.5	KAG6425903.1	89	55	55	0	88.71	1	1	TGCAGAAGCAGGTCTCTCAATTAGTGTATGAAAACAGCTACTTTCGCCAGCATACACCAAAT	TGCAGAAGCAAGTATCACACTTGGTGTATGAAAACAGTTACTTTCGCCAGCATACACCGAAT	69	2544	KAG6425903.1	homeobox-leucine zipper protein	K09338
1230	KAG6428961.1	88.71	62	7	0	1	62	461	522	1.67e-15	81.5	KAG6428961.1	89	55	55	0	88.71	1	1	TGCAGAAGCAGGTCTCTCAATTAGTGTATGAAAACAGCTACTTTCGCCAGCATACACCAAAT	TGCAGAAGCAAGTATCACACTTGGTGTATGAAAACAGTTACTTTCGCCAGCATACACCGAAT	69	2679	KAG6428961.1	homeobox-leucine zipper protein	K09338
1230	KAG6398067.1	83.871	62	10	0	1	62	272	333	1.05e-11	68	KAG6398067.1	74	52	52	0	83.87	1	1	TGCAGAAGCAGGTCTCTCAATTAGTGTATGAAAACAGCTACTTTCGCCAGCATACACCAAAT	TGCAGAAACAAGTATCGCATTTGGTGTATGAGAACAGTTACTTTCGTCAGCATACACCGAAT	69	2484	KAG6398067.1	homeobox-leucine zipper protein	K09338
1232	KAG6389142.1	89.286	56	6	0	1	56	598	543	7.08e-14	75.2	KAG6389142.1	82	50	50	0	89.29	1	-1	TGCAGAAGCAGTCGATATTCGCGTGCATTCTCAACTCCCGGTCCATAACCTTACAG	TGCAGAAGCAATCGATATTTGTATGCATTCTCAACTCCCTGTCCATAACCTTATAG	69	1443	KAG6389142.1	Hypothetical protein	Uncharacterized protein
1232	KAG6390996.1	89.286	56	6	0	1	56	2566	2511	7.08e-14	75.2	KAG6390996.1	82	50	50	0	89.29	1	-1	TGCAGAAGCAGTCGATATTCGCGTGCATTCTCAACTCCCGGTCCATAACCTTACAG	TGCAGAAGCAATCGATATTTGTATGCATTCTCAACTCCCTGTCCATAACCTTATAG	69	3393	KAG6390996.1	diaminohydroxyphosphoribosylaminopyrimidine deaminase / 5-amino-6-(5-phosphoribosylamino)uracil reductase [EC:3.5.4.26 1.1.1.193]	K11752
1232	KAG6388127.1	85.714	56	8	0	1	56	784	729	3.67e-11	66.2	KAG6388127.1	72	48	48	0	85.71	1	-1	TGCAGAAGCAGTCGATATTCGCGTGCATTCTCAACTCCCGGTCCATAACCTTACAG	TGCAGTAGCAATCGATATTTGCATGCATTCTCAGCTCCCTATCCATAACCTTATAG	69	1605	KAG6388127.1	Hypothetical protein	Uncharacterized protein
1240	KAG6396495.1	85.484	62	9	0	2	63	874	935	8.63e-13	72.5	KAG6396495.1	79	53	53	0	85.48	1	1	GCAGAAGCATCTGGCTTGACCGGCGACGTCTCTCAGGTAGAGCAGTTTATCAGAGAACATGT	GCAGAAACATCTGGTTCGACTGGTGACATCTCTCAGTTGGAGCAGTTTATCAGAGAATATGT	69	945	KAG6396495.1	signal recognition particle receptor subunit beta	K12272
1240	KAG6429574.1	82.353	68	12	0	1	68	675	742	3.01e-12	69.8	KAG6429574.1	76	56	56	0	82.35	1	1	TGCAGAAGCATCTGGCTTGACCGGCGACGTCTCTCAGGTAGAGCAGTTTATCAGAGAACATGTAGAGC	TGCAGAAGCATCTGCCTTAACAGGTGATATCTATCATCTAGAGCAGTTTATCAGAGAATGTGTAAAGC	69	747	KAG6429574.1	signal recognition particle receptor subunit beta	K12272
1241	KAG6433817.1	88.333	60	7	0	1	60	713	654	2.03e-14	77.9	KAG6433817.1	85	53	53	0	88.33	1	-1	TGCAGAAGCATGTCATTGTAATACTGAACTCCATAAAACACCCCACTATCATCTGAAAAT	TGCACAAGCCTGTCGTTGTAATATTGAATCCCATAAAAAACCCCACTATCATCTGAAAAT	69	924	KAG6433817.1	Hypothetical protein	Uncharacterized protein
1242	KAG6404793.1	94.203	69	4	0	1	69	1085	1017	1.2e-23	107	KAG6404793.1	118	65	65	0	94.2	1	-1	TGCAGAAGCATGTTTCTGGCCCTAGCCAAAATTTGAACTTTCTTTCTTGATGCAAAGTGCACTTCCACA	TGCAGAAGAATATTTCTGGCCCTAGCCAAAATTTGAACTTTCTTTCTCGATGCAAAGTGCACTTCAACA	69	2082	KAG6404793.1	protein transport protein DSL1/ZW10	K11578
1242	KAG6416995.1	94.203	69	4	0	1	69	1241	1173	1.2e-23	107	KAG6416995.1	118	65	65	0	94.2	1	-1	TGCAGAAGCATGTTTCTGGCCCTAGCCAAAATTTGAACTTTCTTTCTTGATGCAAAGTGCACTTCCACA	TGCAGAAGCATATTTCTGGCCCTAGCCAATATTTGAACTTTCTTTCTCGATGCAAAGTGCACTTCAACA	69	2271	KAG6416995.1	protein transport protein DSL1/ZW10	K11578
1242	KAG6419593.1	92.754	69	5	0	1	69	1247	1179	5.1e-22	103	KAG6419593.1	113	64	64	0	92.75	1	-1	TGCAGAAGCATGTTTCTGGCCCTAGCCAAAATTTGAACTTTCTTTCTTGATGCAAAGTGCACTTCCACA	TGCAGAAGCATATTTCTGGCCTTAGCCAATATTTGAACTTTCTTTCTCGATGCAAAGTGCACTTCAACA	69	2241	KAG6419593.1	protein transport protein DSL1/ZW10	K11578
1256	KAG6433165.1	86.957	69	9	0	1	69	534	602	1.37e-16	85.1	KAG6433165.1	93	60	60	0	86.96	1	1	TGCAGAAGCCCATGTAACTGCTCTTCAGAAACAAGCAGCAGATCTACTTCTTGAATATGACAGACTCTT	TGCAGAAGGCCACGTTGCTGCACTCCAGAAACAAGCAGCAGATCTACTACTTGAATACGACAGACTTTT	69	651	KAG6433165.1	B-cell receptor-associated protein 31	K14009
1256	KAG6414665.1	82.353	68	12	0	2	69	535	602	3.01e-12	69.8	KAG6414665.1	76	56	56	0	82.35	1	1	GCAGAAGCCCATGTAACTGCTCTTCAGAAACAAGCAGCAGATCTACTTCTTGAATATGACAGACTCTT	GCAGAAAGTCATGTTGCTGCACTCCAGAAACAAGCAGCGGATCTACTGCTGGAATACGACAGACTTTT	69	651	KAG6414665.1	B-cell receptor-associated protein 31	K14009
1261	KAG6410754.1	85.246	61	9	0	1	61	1763	1703	3.01e-12	70.7	KAG6410754.1	77	52	52	0	85.25	1	-1	TGCAGAAGCCTCATCGCTCCATCTGGATGCAGCACAACCATCCTTGCTACATCAATAACTG	TGCATAAGCTTCGCTGCTCCATCAGGGTGCAGCACAATCATCCTTACTACATCAATAACTG	69	2268	KAG6410754.1	phospholipase A-2-activating protein	K14018
1264	KAG6429648.1	92.453	53	4	0	1	53	189	137	5.82e-15	78.8	KAG6429648.1	86	49	49	0	92.45	1	-1	TGCAGAAGCCTTCTTCAATCGCTCAAGGTGGACGCACAGTTGCCTAATTTCCT	TGCAGAAGCCTTCTTCAATCTGTCAAGGTGCATGCACAGTTGCCTAATTTCCT	69	2151	KAG6429648.1	Hypothetical protein	Uncharacterized protein
1264	KAG6426332.1	88.679	53	6	0	1	53	189	137	3.01e-12	69.8	KAG6426332.1	76	47	47	0	88.68	1	-1	TGCAGAAGCCTTCTTCAATCGCTCAAGGTGGACGCACAGTTGCCTAATTTCCT	TGCAGAAGCCTTCTTCAATCTGTCAAGGTGCATGCAGAGTTGCCTAATATCCT	69	2262	KAG6426332.1	exocyst complex component 8	K19986
1270	KAG6400848.1	89.855	69	7	0	1	69	324	392	2.64e-19	94.2	KAG6400848.1	103	62	62	0	89.86	1	1	TGCAGAAGCGCTAAAGGTCCTCGACTCATGCGGCTCAGACATTATCGAACTGGGGGTGCCTTATTCCGA	TGCTGAAGCGCTAAAGGTCCTTGACTCATGTGGCTCAGACATTATTGAACTGGGTGTACCTTATTCTGA	69	627	KAG6400848.1	tryptophan synthase alpha chain [EC:4.2.1.20]	K01695
1270	KAG6383281.1	85.507	69	10	0	1	69	357	425	1.67e-15	80.6	KAG6383281.1	88	59	59	0	85.51	1	1	TGCAGAAGCGCTAAAGGTCCTCGACTCATGCGGCTCAGACATTATCGAACTGGGGGTGCCTTATTCCGA	TGCTGAAGCACTCAAGGTCCTTGACTCATGTGGCTCAGACATTATTGAACTCGGTGTACCTTATTCAGA	69	1056	KAG6383281.1	tryptophan synthase alpha chain [EC:4.2.1.20]	K01695
1270	KAG6403024.1	85.507	69	10	0	1	69	357	425	1.67e-15	80.6	KAG6403024.1	88	59	59	0	85.51	1	1	TGCAGAAGCGCTAAAGGTCCTCGACTCATGCGGCTCAGACATTATCGAACTGGGGGTGCCTTATTCCGA	TGCGGAAGCGCTAAAGGTCCTTGATTCATGTGGCTCGGACATTATTGAACTCGGTGTACCTTATTCAGA	69	1056	KAG6403024.1	tryptophan synthase alpha chain [EC:4.2.1.20]	K01695
1271	KAG6400848.1	89.855	69	7	0	1	69	324	392	2.64e-19	94.2	KAG6400848.1	103	62	62	0	89.86	1	1	TGCAGAAGCGCTAAAGGTCCTCGACTCATGCGGCTCAGACATTATCGAACTGGGGGTGCCTTATTCCGA	TGCTGAAGCGCTAAAGGTCCTTGACTCATGTGGCTCAGACATTATTGAACTGGGTGTACCTTATTCTGA	69	627	KAG6400848.1	tryptophan synthase alpha chain [EC:4.2.1.20]	K01695
1271	KAG6383281.1	85.507	69	10	0	1	69	357	425	1.67e-15	80.6	KAG6383281.1	88	59	59	0	85.51	1	1	TGCAGAAGCGCTAAAGGTCCTCGACTCATGCGGCTCAGACATTATCGAACTGGGGGTGCCTTATTCCGA	TGCTGAAGCACTCAAGGTCCTTGACTCATGTGGCTCAGACATTATTGAACTCGGTGTACCTTATTCAGA	69	1056	KAG6383281.1	tryptophan synthase alpha chain [EC:4.2.1.20]	K01695
1271	KAG6403024.1	85.507	69	10	0	1	69	357	425	1.67e-15	80.6	KAG6403024.1	88	59	59	0	85.51	1	1	TGCAGAAGCGCTAAAGGTCCTCGACTCATGCGGCTCAGACATTATCGAACTGGGGGTGCCTTATTCCGA	TGCGGAAGCGCTAAAGGTCCTTGATTCATGTGGCTCGGACATTATTGAACTCGGTGTACCTTATTCAGA	69	1056	KAG6403024.1	tryptophan synthase alpha chain [EC:4.2.1.20]	K01695
1278	KAG6400996.1	92.063	63	5	0	1	63	275	337	9.22e-19	92.4	KAG6400996.1	101	58	58	0	92.06	1	1	TGCAGAAGCGTTGCCACCCCGACATAGCCGGCCCGCCCGGCCACGACATGGCCATCGTTCTTA	TGCAGAAGCGCTGCCATCCGGACATAGCCGGCCCGCCCGGGCACGACATGGCCATCGTGCTTA	69	1512	KAG6400996.1	Hypothetical protein	Uncharacterized protein
1278	KAG6403165.1	91.803	61	5	0	1	61	275	335	1.12e-17	88.7	KAG6403165.1	97	56	56	0	91.8	1	1	TGCAGAAGCGTTGCCACCCCGACATAGCCGGCCCGCCCGGCCACGACATGGCCATCGTTCT	TGCAGAAGCGCTGCCATCCGGACATAGCCGGCCCGCCCGGGCACGACATGGCCATCGTGCT	69	1392	KAG6403165.1	Hypothetical protein	Uncharacterized protein
1282	KAG6415354.1	90.164	61	6	0	9	69	7488	7428	1.37e-16	84.2	KAG6415354.1	92	55	55	0	90.16	1	-1	CTAGTCGGGTTTCGTATACTCGAGCAGCATATGAGGCGACCGGTAGATCTTCACGAGCGTC	CTAGTCGGGCTTCGTGTACTCAAGCAACATATGAGGCGACCTGTAAATCTTCACGAGCGTC	69	7488	KAG6415354.1	piezo-type mechanosensitive ion channel component 1/2	K22128
1282	KAG6417869.1	88.525	61	7	0	9	69	7488	7428	5.82e-15	79.7	KAG6417869.1	87	54	54	0	88.52	1	-1	CTAGTCGGGTTTCGTATACTCGAGCAGCATATGAGGCGACCGGTAGATCTTCACGAGCGTC	CTAGTCGGGCTTCGTGTACTCAAGCAACATATGAGGCGACCTATAAATCTTCACGAGCGTC	69	7488	KAG6417869.1	piezo-type mechanosensitive ion channel component 1/2	K22128
1282	KAG6426878.1	83.607	61	10	0	9	69	7470	7410	3.67e-11	66.2	KAG6426878.1	72	51	51	0	83.61	1	-1	CTAGTCGGGTTTCGTATACTCGAGCAGCATATGAGGCGACCGGTAGATCTTCACGAGCGTC	CTAGTCGGGCTTCGTGTACTCGAGCAGCATATGAGGTGATCTGTAAATTTTAACCAGTGTC	69	7470	KAG6426878.1	piezo-type mechanosensitive ion channel component 1/2	K22128
1283	KAG6434772.1	86.765	68	9	0	2	69	241	308	4.77e-16	83.3	KAG6434772.1	91	59	59	0	86.76	1	1	GCAGAAGCTATAAGGCCGATTGCTTGCAACAGTCAAGGAACTTATATTGCCGGAGGAAGCATCTCTGG	GCAGAGCCTATTAGGCCGATTGCGTGTAACAGCCAAGGAACTTATATTGCCGGCGGAGGCATTTCTGG	69	1476	KAG6434772.1	pre-rRNA-processing protein IPI3	K14829
1288	KAG6383211.1	85.507	69	10	0	1	69	178	110	1.67e-15	80.6	KAG6383211.1	88	59	59	0	85.51	1	-1	TGCAGAAGCTGAAATGTCTGGCCATCGCCTCATCCGGGCTTATCAGCTTCCGACAACGCCAGATTTCGT	TGCAGAAGCTGATATGCCGGGCCACCGCCTCGTCCGGGCTTATCAGCTTCTGACACCTCACGATTTCGT	69	429	KAG6383211.1	Hypothetical protein	Uncharacterized protein
1288	KAG6428831.1	85.507	69	10	0	1	69	277	209	1.67e-15	80.6	KAG6428831.1	88	59	59	0	85.51	1	-1	TGCAGAAGCTGAAATGTCTGGCCATCGCCTCATCCGGGCTTATCAGCTTCCGACAACGCCAGATTTCGT	TGCAGAAGCTGATATGCCGGGCCACCGCCTCGTCCGGGCTTATCAGCTTCTGACACCTCACGATTTCGT	69	528	KAG6428831.1	Hypothetical protein	Uncharacterized protein
1288	KAG6425806.1	84.058	69	11	0	1	69	277	209	7.08e-14	76.1	KAG6425806.1	83	58	58	0	84.06	1	-1	TGCAGAAGCTGAAATGTCTGGCCATCGCCTCATCCGGGCTTATCAGCTTCCGACAACGCCAGATTTCGT	TGCAGAAGCTGATATGCCGCGCCACCGCCTCCTCTGGGCTTATCAGCTTCCGACACCTCACGATTTCGT	69	528	KAG6425806.1	Hypothetical protein	Uncharacterized protein
1290	KAG6404717.1	92.188	64	5	0	6	69	1001	938	2.64e-19	94.2	KAG6404717.1	103	59	59	0	92.19	1	-1	AAGCTGATATCCAAGTCTTCTTCGGGTATTTCTACATCCAACGAGTCCTCGGGAAGAAGAGGCA	AAGCTGAACTCCAAGTCTTCTTCTGGTATTTCTACATTCAACGAGTCCTCAGGAAGAAGAGGCA	69	1401	KAG6404717.1	peptide chain release factor 2	K02836
1290	KAG6402357.1	90.625	64	6	0	6	69	1088	1025	3.22e-18	89.7	KAG6402357.1	98	58	58	0	90.62	1	-1	AAGCTGATATCCAAGTCTTCTTCGGGTATTTCTACATCCAACGAGTCCTCGGGAAGAAGAGGCA	AAGCTGAACTCCAAGTCTTCTTCTGGTATTTCTACGTTCAACGAGTCCTCAGGAAGAAGAGGCA	69	1488	KAG6402357.1	peptide chain release factor 2	K02836
1291	KAG6402188.1	88.235	51	6	0	6	56	31	81	3.67e-11	66.2	KAG6402188.1	72	45	45	0	88.24	1	1	AAGCTGATTGTAAGTTTCTGCGATTTTGGTGGCAGCAGCAGAGGCATCAGG	AAGCTCGTTGTCAGTTTCTGCGATTGGGGCGGCAGCAGCAGAGGCATCAGG	69	366	KAG6402188.1	large subunit ribosomal protein L43	K17424
1292	KAG6437117.1	88.406	69	8	0	1	69	154	86	3.22e-18	89.7	KAG6437117.1	98	61	61	0	88.41	1	-1	TGCAGAAGCTGCAAGAATAAGATCGAGGCGGCCAAACACACCCTCCGAGAGCCCCCGCCGCATCTTCTG	TGCAGAAGCTGCAAGAGTAAGATCTAGGCGGCCAAACGCAGCCTCCAAGGGCCCCGGCCGCGTCTTCTG	69	801	KAG6437117.1	Hypothetical protein	Uncharacterized protein
1292	KAG6433805.1	86.957	69	9	0	1	69	154	86	1.37e-16	85.1	KAG6433805.1	93	60	60	0	86.96	1	-1	TGCAGAAGCTGCAAGAATAAGATCGAGGCGGCCAAACACACCCTCCGAGAGCCCCCGCCGCATCTTCTG	TGCAGAAGCTGCAAGAGTAAGATCTCGGCGGCCAAACGCAGCCTCCAAGTGCCCCGGCCGCGTCTTCTG	69	798	KAG6433805.1	Hypothetical protein	Uncharacterized protein
1299	KAG6393529.1	94.118	68	4	0	2	69	199	266	4.18e-23	105	KAG6393529.1	116	64	64	0	94.12	1	1	GCAGAAGCTGGTGCAAATCTTATTGGGATGATTATTTGGCCCAACTCAAAAAGATCTGTTTCACTATC	GCAGAAGCTGGTGCAAATCTTATTGGGATGATTATTTGGCCCAAATCAAAAAGGTCTATTTCACTCTC	69	780	KAG6393529.1	phosphoribosylanthranilate isomerase [EC:5.3.1.24]	K01817
1299	KAG6395367.1	92.647	68	5	0	2	69	271	338	1.78e-21	101	KAG6395367.1	111	63	63	0	92.65	1	1	GCAGAAGCTGGTGCAAATCTTATTGGGATGATTATTTGGCCCAACTCAAAAAGATCTGTTTCACTATC	GCAGAAGCCGGTGCAAATCTTATTGGGATGATTATTTGGCCCAAATCAAAAAGGTCTATTTCACTTTC	69	852	KAG6395367.1	phosphoribosylanthranilate isomerase [EC:5.3.1.24]	K01817
1307	KAG6403093.1	90.323	62	6	0	1	62	1064	1125	3.92e-17	86	KAG6403093.1	94	56	56	0	90.32	1	1	TGCAGAAGCTGTTTTCTTTGGTAGACCAGACTTCAGTTCCAGACAATCCAGATTCTTTACAA	TGCAGAAATTGTTTTCTTTGGTAGACCAGACGTCAGTACCGGACAATCCTGATTCTTTACAA	69	3399	KAG6403093.1	Hypothetical protein	Uncharacterized protein
1307	KAG6400367.1	88.71	62	7	0	1	62	1076	1137	1.67e-15	81.5	KAG6400367.1	89	55	55	0	88.71	1	1	TGCAGAAGCTGTTTTCTTTGGTAGACCAGACTTCAGTTCCAGACAATCCAGATTCTTTACAA	TGCAGAAATTGTTTTCTCTGGTAGACCAGACATCAGTACCGGACAATCCTGATTCTTTACAA	69	3939	KAG6400367.1	Hypothetical protein	Uncharacterized protein
1307	KAG6402573.1	88.71	62	7	0	1	62	1157	1218	1.67e-15	81.5	KAG6402573.1	89	55	55	0	88.71	1	1	TGCAGAAGCTGTTTTCTTTGGTAGACCAGACTTCAGTTCCAGACAATCCAGATTCTTTACAA	TGCAGAAATTGTTTTCTCTGGTAGACCAGACATCAGTACCGGACAATCCTGATTCTTTACAA	69	3741	KAG6402573.1	Hypothetical protein	Uncharacterized protein
1312	KAG6423367.1	95.652	69	3	0	1	69	582	650	9.84e-25	112	KAG6423367.1	123	66	66	0	95.65	1	1	TGCAGAAGCTTCAGCAGCACCTAAAGAAACAGAAAGACAGCTTTCCAAGAAGGAGAGAAGGAAAAAGGA	TGCAGAAGCTTCATCAGCACCTAAAGAGACAGAAAGACAGCTTTCCAAGAAGGAGAGAAAGAAAAAGGA	69	1116	KAG6423367.1	Hypothetical protein	Uncharacterized protein
1312	KAG6414582.1	89.855	69	7	0	1	69	162	230	2.64e-19	94.2	KAG6414582.1	103	62	62	0	89.86	1	1	TGCAGAAGCTTCAGCAGCACCTAAAGAAACAGAAAGACAGCTTTCCAAGAAGGAGAGAAGGAAAAAGGA	TGCAGAAACTTCATCAGCACCTAAAGAGACTGAAAGACAGCTTTCTAAAAAGGAGAGAAGGAAAATGGA	69	687	KAG6414582.1	Hypothetical protein	Uncharacterized protein
1312	KAG6417124.1	88.406	69	8	0	1	69	423	491	3.22e-18	89.7	KAG6417124.1	98	61	61	0	88.41	1	1	TGCAGAAGCTTCAGCAGCACCTAAAGAAACAGAAAGACAGCTTTCCAAGAAGGAGAGAAGGAAAAAGGA	TGCAGAAACTTCATCAGCACCTAAAGAGACTGAAAGACAGCTTTCTAAAAAAGAGAGAAGGAAAATGGA	69	951	KAG6417124.1	Hypothetical protein	Uncharacterized protein
1314	KAG6416338.1	85.507	69	10	0	1	69	1000	932	1.67e-15	80.6	KAG6416338.1	88	59	59	0	85.51	1	-1	TGCAGAAGCTTCCTTTCATCTTAGTATCCATGTAGTCAACAAGAAATCTGCTCTGCGTCTCACCATTTG	TGCAGAAGCTTCCTTTCATCTCATTTTGCAAGTACTCCACAAGAAGTTTGCTCTGCCTCTCACCATTTG	69	1062	KAG6416338.1	release factor glutamine methyltransferase [EC:2.1.1.297]	K02493
1314	KAG6418882.1	84.058	69	11	0	1	69	1000	932	7.08e-14	76.1	KAG6418882.1	83	58	58	0	84.06	1	-1	TGCAGAAGCTTCCTTTCATCTTAGTATCCATGTAGTCAACAAGAAATCTGCTCTGCGTCTCACCATTTG	TGCAGAAGCTTCCTTTCATCTCATTTTGCAAGTAGTCCACCACAAGTTTGCTCTGCATCTCACCATTTG	69	1062	KAG6418882.1	release factor glutamine methyltransferase [EC:2.1.1.297]	K02493
1318	KAG6402898.1	90.164	61	6	0	1	61	1501	1441	1.37e-16	84.2	KAG6402898.1	92	55	55	0	90.16	1	-1	TGCAGAAGCTTCTAGATCCATTCACCACGCGTTGCGATCTCCGCGTATGAAGCTTGATGTT	TGCAGATGCTTCTAGATTCTTTCACAACGCGTTGCGATCTCCTCGAATGAAGCTTGATGTT	69	1551	KAG6402898.1	Hypothetical protein	Uncharacterized protein
1318	KAG6435051.1	85.246	61	9	0	1	61	1480	1420	3.01e-12	70.7	KAG6435051.1	77	52	52	0	85.25	1	-1	TGCAGAAGCTTCTAGATCCATTCACCACGCGTTGCGATCTCCGCGTATGAAGCTTGATGTT	TGCAGATGCTTCTAGATTCTTTCACAACACGTTGTGATCTCCTCGAGTGAAGCTTGATGTT	69	1530	KAG6435051.1	Hypothetical protein	Uncharacterized protein
1318	KAG6438390.1	83.607	61	10	0	1	61	1402	1342	3.67e-11	66.2	KAG6438390.1	72	51	51	0	83.61	1	-1	TGCAGAAGCTTCTAGATCCATTCACCACGCGTTGCGATCTCCGCGTATGAAGCTTGATGTT	TGCAGATGCTTCTAGATTCTTTGACAGCACGTTGCGATCTCCTCGAGTGAAGCTTGATGTT	69	1452	KAG6438390.1	Hypothetical protein	Uncharacterized protein
1319	KAG6395795.1	86.957	69	9	0	1	69	1279	1211	1.37e-16	85.1	KAG6395795.1	93	60	60	0	86.96	1	-1	TGCAGAAGCTTCTATTCATTCTCTGTGCTAATTTCAGTATGCTTTTCCTCCCAACAAGAGTAGCCACAC	TGCAGAAGCTTCTGCTCATTCTCTGTGCTAGTTTGAGAATGCTTTTTCTCCCAGCAAGTGTAGCAACAC	69	1950	KAG6395795.1	homeobox-leucine zipper protein	K09338
1326	KAG6388657.1	85.507	69	10	0	1	69	2259	2327	1.67e-15	80.6	KAG6388657.1	88	59	59	0	85.51	1	1	TGCAGAAGCTTTGGTTGAGGATGTTGTTTCAGCTATAACAAAGGTTTTAGGTGAAGGATCGTTTGAGGG	TGCAGGAGCATTGGCTGAGGATGTTGTTTCAGCTATAACAAGAGTCTTAGAAGAAGGATCATTAGAGGG	69	7017	KAG6388657.1	Hypothetical protein	Uncharacterized protein
1336	KAG6413020.1	91.045	67	6	0	1	67	733	667	7.56e-20	95.1	KAG6413020.1	104	61	61	0	91.04	1	-1	TGCAGAAGGAAGGCCTAATGGGCAAGCCAAATACACGAGTTTGAGACTCTTCTAGGCCGTCCAGCAA	TGCAGAAGGAAGGCCTAATGGGCAAGCCATATACGCGAGTTTGAGATTTGTCTAGGCCGTCTAGCAA	69	1374	KAG6413020.1	1,2-diacylglycerol 3-beta-galactosyltransferase [EC:2.4.1.46]	K03715
1336	KAG6410445.1	88.06	67	8	0	1	67	733	667	3.92e-17	86	KAG6410445.1	94	59	59	0	88.06	1	-1	TGCAGAAGGAAGGCCTAATGGGCAAGCCAAATACACGAGTTTGAGACTCTTCTAGGCCGTCCAGCAA	TGCAGAAGGAAGGCCTAATGGGCAAGCCGTATACGCGAGTTTGAGATTGGTCTAGGCCATCTAGCAA	69	1374	KAG6410445.1	1,2-diacylglycerol 3-beta-galactosyltransferase [EC:2.4.1.46]	K03715
1336	KAG6424193.1	86.567	67	9	0	1	67	1180	1114	1.67e-15	81.5	KAG6424193.1	89	58	58	0	86.57	1	-1	TGCAGAAGGAAGGCCTAATGGGCAAGCCAAATACACGAGTTTGAGACTCTTCTAGGCCGTCCAGCAA	TGCAGAAGGAAGGGCGGATGGGCAAGCCGTATACACGAGTTTGAGATTCGTCTAGGCCATCTAGCAA	69	1821	KAG6424193.1	1,2-diacylglycerol 3-beta-galactosyltransferase [EC:2.4.1.46]	K03715
1342	KAG6410649.1	85.507	69	10	0	1	69	196	264	1.67e-15	80.6	KAG6410649.1	88	59	59	0	85.51	1	1	TGCAGAAGGAATGGAGTGAATAGAGGGCCAATTCAATGCCGGAAAAGGTGGAGCAATCTTCTCAGCGAT	TGCAGACGAAATGGAGTGGGCAGAGGGCCGATCCAATGCCGGAAGAGATGGAGCAATCTCCTCAGCGAT	69	930	KAG6410649.1	Hypothetical protein	Uncharacterized protein
1342	KAG6413228.1	85.507	69	10	0	1	69	133	201	1.67e-15	80.6	KAG6413228.1	88	59	59	0	85.51	1	1	TGCAGAAGGAATGGAGTGAATAGAGGGCCAATTCAATGCCGGAAAAGGTGGAGCAATCTTCTCAGCGAT	TGCAGACGAAATGGAGTGAGCAGAGGGCCGATCCAATGCCAGAAAAGATGGAGCAATCTCCTCAGTGAT	69	765	KAG6413228.1	Hypothetical protein	Uncharacterized protein
1348	KAG6400691.1	92.754	69	5	0	1	69	1002	1070	5.1e-22	103	KAG6400691.1	113	64	64	0	92.75	1	1	TGCAGAAGGAGCAGTAAGAATCAAGAAACAAAGGCCACACAGAGGGGAGGATTTCACTATGATGGAGGC	TGCAGAAGGAGCAGTAAGAATCAAGAAACGAAGGCCACATCGGGGGGAAGATTTCACTATGATGGAGGC	69	1776	KAG6400691.1	Hypothetical protein	Uncharacterized protein
1348	KAG6435074.1	92.754	69	5	0	1	69	996	1064	5.1e-22	103	KAG6435074.1	113	64	64	0	92.75	1	1	TGCAGAAGGAGCAGTAAGAATCAAGAAACAAAGGCCACACAGAGGGGAGGATTTCACTATGATGGAGGC	TGCCGAAGGAGCAGTGAGAATCAAGAAACGAAGGCCACACCGAGGAGAGGATTTCACTATGATGGAGGC	69	1770	KAG6435074.1	Hypothetical protein	Uncharacterized protein
1348	KAG6402882.1	91.304	69	6	0	1	69	1002	1070	6.21e-21	98.7	KAG6402882.1	108	63	63	0	91.3	1	1	TGCAGAAGGAGCAGTAAGAATCAAGAAACAAAGGCCACACAGAGGGGAGGATTTCACTATGATGGAGGC	TGCAGAAGGAGCAGTAAGAATCAAGAAACGAAGGCCACACCGGGGGGAAGATTTCACAATGATGGAAGC	69	1776	KAG6402882.1	Hypothetical protein	Uncharacterized protein
1349	KAG6422661.1	92.754	69	5	0	1	69	53	121	5.1e-22	103	KAG6422661.1	113	64	64	0	92.75	1	1	TGCAGAAGGAGCTGGTGGAGTGGCAGGTGAATCCGCCCTCCGGTTTCAAGCACAAAGCCACTGATAATC	TGCAGAAAGAGCTTGTGGAGTGGCAGGTGAATCCGCCCGCCGGTTTCAAGCACAAACCTACTGATAATC	69	480	KAG6422661.1	ubiquitin-conjugating enzyme E2 W [EC:2.3.2.25]	K10688
1349	KAG6406447.1	89.855	69	7	0	1	69	62	130	2.64e-19	94.2	KAG6406447.1	103	62	62	0	89.86	1	1	TGCAGAAGGAGCTGGTGGAGTGGCAGGTGAATCCGCCCTCCGGTTTCAAGCACAAAGCCACTGATAATC	TGCAGAAAGAGCTTGTGGAGTGGCAGGTGAATCCGCCCACCGGTTTTAAGCATAAACCTACTGATAATC	69	639	KAG6406447.1	Hypothetical protein	Uncharacterized protein
1349	KAG6408785.1	89.855	69	7	0	1	69	59	127	2.64e-19	94.2	KAG6408785.1	103	62	62	0	89.86	1	1	TGCAGAAGGAGCTGGTGGAGTGGCAGGTGAATCCGCCCTCCGGTTTCAAGCACAAAGCCACTGATAATC	TGCAGAAAGAGCTCGTGGAGTGGCAGGTGAATCCGCCCACCGGTTTTAAGCATAAACCTACTGATAATC	69	486	KAG6408785.1	ubiquitin-conjugating enzyme E2 W [EC:2.3.2.25]	K10688
1355	KAG6437320.1	92.308	65	5	0	5	69	1439	1375	7.56e-20	96	KAG6437320.1	105	60	60	0	92.31	1	-1	GAAGGATCATAGAATCTCTCAATGAGGGAGACGACCGTGCTTTTACCAGAACCACTGCTTCCGAC	GAAGGATCATAGAATCTCTCGATGAGGGACACCACCGTGCTTTTACCCGAGCCACTGCTTCCGAC	69	3996	KAG6437320.1	ATP-binding cassette, subfamily B (MDR/TAP), member 1 [EC:7.6.2.2]	K05658
1355	KAG6433996.1	89.231	65	7	0	5	69	1436	1372	3.92e-17	86.9	KAG6433996.1	95	58	58	0	89.23	1	-1	GAAGGATCATAGAATCTCTCAATGAGGGAGACGACCGTGCTTTTACCAGAACCACTGCTTCCGAC	GAGGGATCATAGAATCTCTCGATGAGGGACACCACCGTGCTTTTACCCGAGCCACTGCTCCCGAC	69	3993	KAG6433996.1	ATP-binding cassette, subfamily B (MDR/TAP), member 1 [EC:7.6.2.2]	K05658
1355	KAG6401550.1	87.302	63	8	0	7	69	1386	1324	5.82e-15	78.8	KAG6401550.1	86	55	55	0	87.3	1	-1	AGGATCATAGAATCTCTCAATGAGGGAGACGACCGTGCTTTTACCAGAACCACTGCTTCCGAC	AGGGTCATAGAATCTCTCAATGAGGGACACCACCGTGCTCTTGCCGGATCCACTGCTGCCGAC	69	3936	KAG6401550.1	ATP-binding cassette, subfamily B (MDR/TAP), member 1 [EC:7.6.2.2]	K05658
1361	KAG6385547.1	86.364	66	9	0	4	69	249	314	5.82e-15	79.7	KAG6385547.1	87	57	57	0	86.36	1	1	AGAAGGATTGTGTTGGGCAAGAACAGCAGAGAGACAGAGCTCTAGGATGAGACTGGAGTACCTGAA	AGAAGGATTATGTTGGGCAAGAACAGCGGAGAGGCAGAGTTCCCGGATGAGATTGGAGTATCTAAA	69	3750	KAG6385547.1	ATP-binding cassette, subfamily B (MDR/TAP), member 1 [EC:7.6.2.2]	K05658
1362	KAG6424405.1	85.507	69	10	0	1	69	792	724	1.67e-15	80.6	KAG6424405.1	88	59	59	0	85.51	1	-1	TGCAGAAGGCAAAGCAAGCTTCAAGGTTGTAAACACATGACTCAAGGACTCCAAAGTAAATCCATCCCA	TGCAGAAGGCAGAGCAAGCTTCAAGCTTGGCCATATATGACTTAAAGACTCCCAAGTAAATCCATCCCA	69	1431	KAG6424405.1	multidrug resistance protein, MATE family	K03327
1362	KAG6419568.1	84.058	69	11	0	1	69	942	874	7.08e-14	76.1	KAG6419568.1	83	58	58	0	84.06	1	-1	TGCAGAAGGCAAAGCAAGCTTCAAGGTTGTAAACACATGACTCAAGGACTCCAAAGTAAATCCATCCCA	TGCAGAAGGCACAGCAAGCTTCAAGGTTGGCCATATATGCCTTAAAGACTCCCAAGTAAATCCATTCCA	69	1581	KAG6419568.1	multidrug resistance protein, MATE family	K03327
1362	KAG6421368.1	84.058	69	11	0	1	69	801	733	7.08e-14	76.1	KAG6421368.1	83	58	58	0	84.06	1	-1	TGCAGAAGGCAAAGCAAGCTTCAAGGTTGTAAACACATGACTCAAGGACTCCAAAGTAAATCCATCCCA	TGCAGAAGGCAGAGCAAGCTTCAAGGTCGGCCATATATGACTTAACGACTCCCAAATAAATCCATCCCA	69	1440	KAG6421368.1	multidrug resistance protein, MATE family	K03327
1376	KAG6421392.1	92.537	67	5	0	1	67	414	480	6.21e-21	99.6	KAG6421392.1	109	62	62	0	92.54	1	1	TGCAGAAGGCCGGCCATATGCTGCAATATGTGCAGCTCCTGCTGTGGCACTTGGGTCATGGGGCCTG	TGCTGAAGGCCGGCCATATGCTGCGATCTGTGCAGCTCCTGCTGTGGCACTCGGGTCATGGGGACTG	69	1305	KAG6421392.1	protein deglycase [EC:3.5.1.124]	K03152
1376	KAG6424463.1	91.045	67	6	0	1	67	405	471	7.56e-20	95.1	KAG6424463.1	104	61	61	0	91.04	1	1	TGCAGAAGGCCGGCCATATGCTGCAATATGTGCAGCTCCTGCTGTGGCACTTGGGTCATGGGGCCTG	TGCTGAAGGCCGGCCATATGCTGCGATCTGTGCAGCTCCTGCTGTAGCACTCGGGTCATGGGGACTG	69	1122	KAG6424463.1	protein deglycase [EC:3.5.1.124]	K03152
1384	KAG6420164.1	87.5	56	7	0	4	59	402	347	3.01e-12	70.7	KAG6420164.1	77	49	49	0	87.5	1	-1	AGAAGGCTCCTCATCCTTCTTCAGCTCCGTCTCAAATTCTTTGGCTGCCTGCGGTG	AGAAGGCTCGCCATCCTTGGTCAGTTCTGTCTCAAATTCTTTGGCTGCCTGCAGTG	69	489	KAG6420164.1	sec-independent protein translocase protein TatA	K03116
1385	KAG6384158.1	85.507	69	10	0	1	69	62	130	1.67e-15	80.6	KAG6384158.1	88	59	59	0	85.51	1	1	TGCAGAAGGGAAAAGAGGAAGCTTCTTCGCAAACAAGCAAGTATGAGGAACTTCTTGAGAGTAAAAAAG	TGCAGAAGGAAAAAGAGAAAGCTTCTTCATATACAAGCAAGTATGACGAGCTTCTTGTGAGTTCAAAAG	69	2640	KAG6384158.1	Hypothetical protein	Uncharacterized protein
1385	KAG6422375.1	85.507	69	10	0	1	69	2867	2935	1.67e-15	80.6	KAG6422375.1	88	59	59	0	85.51	1	1	TGCAGAAGGGAAAAGAGGAAGCTTCTTCGCAAACAAGCAAGTATGAGGAACTTCTTGAGAGTAAAAAAG	TGCAGAAGGAAAAAGAGAAAGCTTCTTCATATACAAGCAAGTATGACGAGCTTCTTGTGAGTTCAAAAG	69	5700	KAG6422375.1	Hypothetical protein	Uncharacterized protein
1387	KAG6396495.1	96.97	66	2	0	4	69	473	538	9.84e-25	111	KAG6396495.1	122	64	64	0	96.97	1	1	AGAAGGGAAAAGTGAAGCCTGTACACATTGTTGATGTTCCCGGGCATTCACGTCTTAGACCCAAAC	AGAAGGGAAAAGTGAAGCCTGTTCACATTGTTGATGTTCCTGGGCATTCACGTCTTAGACCCAAAC	69	945	KAG6396495.1	signal recognition particle receptor subunit beta	K12272
1387	KAG6398788.1	93.939	66	4	0	4	69	419	484	5.1e-22	102	KAG6398788.1	112	62	62	0	93.94	1	1	AGAAGGGAAAAGTGAAGCCTGTACACATTGTTGATGTTCCCGGGCATTCACGTCTTAGACCCAAAC	AGAAGGGAAAAGTGAAGCCTGTTCACGTTGTTGATGTTCCTGGGCATTCACGTCTTAAACCCAAAC	69	1182	KAG6398788.1	Hypothetical protein	Uncharacterized protein
1387	KAG6405678.1	92.424	66	5	0	4	69	314	379	2.17e-20	97.8	KAG6405678.1	107	61	61	0	92.42	1	1	AGAAGGGAAAAGTGAAGCCTGTACACATTGTTGATGTTCCCGGGCATTCACGTCTTAGACCCAAAC	AGAAGGGAAAAGTGAAGCCAGTGCACATTGTAGATGTTCCTGGGCACTCACGTCTTAGACCCAAAC	69	1227	KAG6405678.1	Hypothetical protein	Uncharacterized protein
1393	KAG6427879.1	94.118	68	4	0	2	69	320	253	4.18e-23	105	KAG6427879.1	116	64	64	0	94.12	1	-1	GCAGAAGGGCAACGACTTGCTAGTTCAGCATAGCAGAATGCAGAAAGAGCAGCCGCTATTCCAGCAAT	GCAGAAGGGCAACGACTAGATAGCTCGGCATAGCAGAATGCAGAAAGAGCAGCCGCTATTCCAGCAAT	69	1938	KAG6427879.1	solute carrier family 7 (cationic amino acid transporter), member 1	K13863
1393	KAG6430925.1	94.118	68	4	0	2	69	320	253	4.18e-23	105	KAG6430925.1	116	64	64	0	94.12	1	-1	GCAGAAGGGCAACGACTTGCTAGTTCAGCATAGCAGAATGCAGAAAGAGCAGCCGCTATTCCAGCAAT	GCAGAAGGGCAACGACTAGATAGCTCGGCATAGCAGAATGCAGAAAGAGCAGCCGCTATTCCAGCAAT	69	2040	KAG6430925.1	solute carrier family 7 (cationic amino acid transporter), member 1	K13863
1393	KAG6414351.1	92.647	68	5	0	2	69	329	262	1.78e-21	101	KAG6414351.1	111	63	63	0	92.65	1	-1	GCAGAAGGGCAACGACTTGCTAGTTCAGCATAGCAGAATGCAGAAAGAGCAGCCGCTATTCCAGCAAT	GCAGAAGGGCAACGACTTGCTAGCTCAGCGTAGCAGAATGCAGAAAGAGCAGCTGCTATCCCGGCAAT	69	1920	KAG6414351.1	solute carrier family 7 (cationic amino acid transporter), member 1	K13863
1398	KAG6431339.1	89.552	67	7	0	3	69	179	245	3.22e-18	90.6	KAG6431339.1	99	60	60	0	89.55	1	1	CAGAAGGGGAAGAGGGGTTCTTTTTCGGATTGGCTACTGCACCAGCACATGTGGAGGACAGGCTAAA	CAGAAGGGGAAAAGGGGTTCTTTTTCGGATTAGCTACGGCACCTGCACATGTTGAGGATAGGCTCAA	69	1944	KAG6431339.1	galactolipid galactosyltransferase [EC:2.4.1.184]	K21362
1400	KAG6383537.1	90.566	53	5	0	1	53	695	747	2.47e-13	74.3	KAG6383537.1	81	48	48	0	90.57	1	1	TGCAGAAGGGGCAGGTTAGGGTGGAACATTATGCATCGAAGAGGACGAAATTC	TGCAGAAGGGGCAGGTCAGGGTGGAACATTACGCTTCAAAGAGGACTAAATTC	69	1356	KAG6383537.1	WD repeat-containing protein 45	K22991
1400	KAG6415319.1	90.566	53	5	0	1	53	695	747	2.47e-13	74.3	KAG6415319.1	81	48	48	0	90.57	1	1	TGCAGAAGGGGCAGGTTAGGGTGGAACATTATGCATCGAAGAGGACGAAATTC	TGCAGAAGGGGCAGGTCAGGGTGGAACATTACGCTTCAAAGAGGACTAAATTC	69	1356	KAG6415319.1	WD repeat-containing protein 45	K22991
1405	KAG6401686.1	91.935	62	5	0	1	62	251	190	3.22e-18	90.6	KAG6401686.1	99	57	57	0	91.94	1	-1	TGCAGAAGGGTGTTGAGGCCAGCAACAAACAGTAGAGTCTGAATTACTTTTGCTTTCTCCTC	TGCAGGAGGGTGTTGAGCCCAGCAACAAACAGCAGAGTTTGAATGACTTTTGCTTTCTCCTC	69	1551	KAG6401686.1	solute carrier family 23 (nucleobase transporter), member 1	K14611
1405	KAG6403952.1	90.323	62	6	0	1	62	251	190	3.92e-17	86	KAG6403952.1	94	56	56	0	90.32	1	-1	TGCAGAAGGGTGTTGAGGCCAGCAACAAACAGTAGAGTCTGAATTACTTTTGCTTTCTCCTC	TGCAGGAGGGTGTTGAGCCCAGCAACAAACAGCAGAGTTTGTATGACTTTTGCTTTCTCCTC	69	1596	KAG6403952.1	solute carrier family 23 (nucleobase transporter), member 1	K14611
1405	KAG6386161.1	88.71	62	7	0	1	62	251	190	1.67e-15	81.5	KAG6386161.1	89	55	55	0	88.71	1	-1	TGCAGAAGGGTGTTGAGGCCAGCAACAAACAGTAGAGTCTGAATTACTTTTGCTTTCTCCTC	TGCAGGAGGGTGTTGAGCCCAGTAACAAACAGCAGAGTTTGGATGACTTTTGCTTTCTCCTC	69	1533	KAG6386161.1	solute carrier family 23 (nucleobase transporter), member 1	K14611
1418	KAG6387596.1	91.304	69	6	0	1	69	174	242	6.21e-21	98.7	KAG6387596.1	108	63	63	0	91.3	1	1	TGCAGAAGGTCCAAGAGGCTTGTACAAAGGCATGGGAGCCCCACTTGCTACTGTGGCAGCCTTCAACGC	TGCTGAAGGTCCAAGGGGTTTATACAAAGGCATGGGAGCTCCACTTGCTACTGTGGCAGCCTTCAATGC	69	930	KAG6387596.1	solute carrier family 25 (mitochondrial carnitine/acylcarnitine transporter), member 20/29	K15109
1418	KAG6385767.1	89.855	69	7	0	1	69	174	242	2.64e-19	94.2	KAG6385767.1	103	62	62	0	89.86	1	1	TGCAGAAGGTCCAAGAGGCTTGTACAAAGGCATGGGAGCCCCACTTGCTACTGTGGCAGCCTTCAACGC	TGCTGAAGGTCCGAGGGGTTTATACAAAGGCATGGGAGCCCCACTTGCCACTGTGGCAGCCTTCAATGC	69	951	KAG6385767.1	solute carrier family 25 (mitochondrial carnitine/acylcarnitine transporter), member 20/29	K15109
1418	KAG6394462.1	81.159	69	13	0	1	69	1467	1535	3.67e-11	67.1	KAG6394462.1	73	56	56	0	81.16	1	1	TGCAGAAGGTCCAAGAGGCTTGTACAAAGGCATGGGAGCCCCACTTGCTACTGTGGCAGCCTTCAACGC	TGCTGAAGGTGCGGGGGGTCTGTACAAGGGCATGGGAGCCCCTCTTGCCACTGTGGCAGCCCTTAATGC	69	2187	KAG6394462.1	solute carrier family 25 (mitochondrial carnitine/acylcarnitine transporter), member 20/29	K15109
1419	KAG6411876.1	92.754	69	5	0	1	69	320	388	5.1e-22	103	KAG6411876.1	113	64	64	0	92.75	1	1	TGCAGAAGGTCTACAAGAGCTTCCGGACTAGACGAAAGCTAGCAGATTGTGCTGTTATGATTGAGCAGA	TGCAGAAGGTCTACAAGAGCTTCCGGACAAGGCGAAAGCTTGCTGATTGTGCTGTTTTGATTGAGCAGA	69	4158	KAG6411876.1	Hypothetical protein	Uncharacterized protein
1419	KAG6411876.1	91.304	69	6	0	1	69	1877	1945	6.21e-21	98.7	KAG6411876.1	108	63	63	0	91.3	1	1	TGCAGAAGGTCTACAAGAGCTTCCGGACTAGACGAAAGCTAGCAGATTGTGCTGTTATGATTGAGCAGA	TGCAGAAGGTCTACAAGAGCTTCCGGACCAGGCGAATGCTTGCTGATTGTGCTGTTCTGATTGAGCAGA	69	4158	KAG6411876.1	Hypothetical protein	Uncharacterized protein
1419	KAG6386493.1	91.304	69	6	0	1	69	320	388	6.21e-21	98.7	KAG6386493.1	108	63	63	0	91.3	1	1	TGCAGAAGGTCTACAAGAGCTTCCGGACTAGACGAAAGCTAGCAGATTGTGCTGTTATGATTGAGCAGA	TGCAGAAGGTCTACAAGAGCTTCCGGACAAGGCGAAAGCTTGCTGATTGTGCTGTTCTAATTGAGCAGA	69	1650	KAG6386493.1	Hypothetical protein	Uncharacterized protein
1419	KAG6401279.1	89.855	69	7	0	1	69	368	436	2.64e-19	94.2	KAG6401279.1	103	62	62	0	89.86	1	1	TGCAGAAGGTCTACAAGAGCTTCCGGACTAGACGAAAGCTAGCAGATTGTGCTGTTATGATTGAGCAGA	TGCAGAAGGTTTACAAGAGCTTCCGCACTAGGCGAAAGCTTGCTGATTGTGCTGTCCTGATTGAGCAGA	69	1752	KAG6401279.1	Hypothetical protein	Uncharacterized protein
1421	KAG6428648.1	87.879	66	8	0	2	67	686	621	1.37e-16	84.2	KAG6428648.1	92	58	58	0	87.88	1	-1	GCAGAAGGTCTGACGCCTCCTAGGGCAGTGTATAATGCCAATTTTCCAACCGGTATCCCCATTCCC	GCAGAAGGCCTGACACCTCCTAGAGCAGTGTATAACACCAATTTCCCCACCGGTATTCCCATTCCC	69	954	KAG6428648.1	Hypothetical protein	Uncharacterized protein
1423	KAG6398577.1	94.118	68	4	0	2	69	854	787	4.18e-23	105	KAG6398577.1	116	64	64	0	94.12	1	-1	GCAGAAGGTCTGTCCTTGGGATCAAAAGCAAGCATTCTTTGTAAGAGGCGAAGAGCAAAGGGATCAGC	GCAGAAGGTCGGTCCTTGGGATCAAAAGCGAGCATTCTTTGTAAGAGACGGAGAGCAAAGGGATCAGC	69	2502	KAG6398577.1	mitogen-activated protein kinase 1/3 [EC:2.7.11.24]	K04371
1423	KAG6431116.1	86.957	69	9	0	1	69	915	847	1.37e-16	85.1	KAG6431116.1	93	60	60	0	86.96	1	-1	TGCAGAAGGTCTGTCCTTGGGATCAAAAGCAAGCATTCTTTGTAAGAGGCGAAGAGCAAAGGGATCAGC	TGCAGAAGGTCTGTCCTTGGGATCAAAAGCCAGCATTCTTTCCAATAAGCAAAGAGCTAGGGGATCTGC	69	1659	KAG6431116.1	mitogen-activated protein kinase 1/3 [EC:2.7.11.24]	K04371
1426	KAG6409764.1	85.507	69	10	0	1	69	499	431	1.67e-15	80.6	KAG6409764.1	88	59	59	0	85.51	1	-1	TGCAGAAGGTGGTTTTGCCGTCGGAGATGGTGACGGCGTGAAGCATGCCGTCGCCGTCAAACATGTGGT	TGCAGAATATGGCGCGGCCGCCGGAGACGGTGACGGCGTGGAGCATGCCGTCGCCGTCGAACATGTGGT	69	1740	KAG6409764.1	Hypothetical protein	Uncharacterized protein
1426	KAG6387826.1	84.375	64	10	0	1	64	64	1	8.63e-13	71.6	KAG6387826.1	78	54	54	0	84.38	1	-1	TGCAGAAGGTGGTTTTGCCGTCGGAGATGGTGACGGCGTGAAGCATGCCGTCGCCGTCAAACAT	TGCAGAATGTGGCGCGACCGCCGGAGACGGTGACGGCGTGGAGCATGCCGTCGCCGTCGAACAT	69	1308	KAG6387826.1	9-cis-epoxycarotenoid dioxygenase [EC:1.13.11.51]	K09840
1426	KAG6409765.1	82.609	69	12	0	1	69	520	452	8.63e-13	71.6	KAG6409765.1	78	57	57	0	82.61	1	-1	TGCAGAAGGTGGTTTTGCCGTCGGAGATGGTGACGGCGTGAAGCATGCCGTCGCCGTCAAACATGTGGT	TGCAGAGGGTGGCTCGGCCGTTGGAGATTCTGATGGCGTGGAGCATGCCGTCGCCGTCGAAGAGGTGGT	69	1767	KAG6409765.1	9-cis-epoxycarotenoid dioxygenase [EC:1.13.11.51]	K09840
1433	KAG6423012.1	93.878	49	3	0	21	69	519	471	7.08e-14	76.1	KAG6423012.1	83	46	46	0	93.88	1	-1	ACCCCATCCGCTTGGATCAGCAGCATCTCGACATTCTACCCTGAACCTT	ACCCCATCCACTTGGATCAGCAGCATCACGACATTCTACCCTGAACTTT	69	1251	KAG6423012.1	Hypothetical protein	Uncharacterized protein
1433	KAG6420006.1	89.796	49	5	0	21	69	408	360	3.67e-11	67.1	KAG6420006.1	73	44	44	0	89.8	1	-1	ACCCCATCCGCTTGGATCAGCAGCATCTCGACATTCTACCCTGAACCTT	ACCCCATCCACCTGGATCAGCAGCATCACGGCATTCTACCCTGAACTTT	69	2043	KAG6420006.1	Hypothetical protein	Uncharacterized protein
1434	KAG6422200.1	89.552	67	7	0	1	67	780	714	3.22e-18	90.6	KAG6422200.1	99	60	60	0	89.55	1	-1	TGCAGAAGTAACCTCGGAGAAACTGAGATCTGGATATGGCATGTCACAGCAATATATCTCCCATAAA	TGCTGAAGTCACCTCCGAGAAACTAAGGTCCGGATATGGCATGTCGCAGCAATATATCTCCCATAAA	69	921	KAG6422200.1	Hypothetical protein	Uncharacterized protein
1434	KAG6392469.1	88.235	68	8	0	2	69	905	838	1.12e-17	87.8	KAG6392469.1	96	60	60	0	88.24	1	-1	GCAGAAGTAACCTCGGAGAAACTGAGATCTGGATATGGCATGTCACAGCAATATATCTCCCATAAACA	GCTGAAGTCAATTCGGAGAAGCTGAGATTTGGAAATGGCATGTCACAGCAATATATCTCCCATAAGCA	69	1125	KAG6392469.1	Hypothetical protein	Uncharacterized protein
1434	KAG6394219.1	88.235	68	8	0	2	69	1004	937	1.12e-17	87.8	KAG6394219.1	96	60	60	0	88.24	1	-1	GCAGAAGTAACCTCGGAGAAACTGAGATCTGGATATGGCATGTCACAGCAATATATCTCCCATAAACA	GCTGAAGTCAATTCGGAGAAGCTGAGATTTGGAAATGGCATGTCACAGCAATATATCTCCCATAAGCA	69	1224	KAG6394219.1	Hypothetical protein	Uncharacterized protein
1439	KAG6412492.1	92.754	69	5	0	1	69	533	601	5.1e-22	103	KAG6412492.1	113	64	64	0	92.75	1	1	TGCAGAAGTACAGGCTGTATGTGAAGAGGATGCAGGGGTTGTCCAACGAAGGACCATCGCCGTCCGATC	TGCAGAAGTACAGGCTGTATGTGAAGAGGATGCAGGGTTTGTCCAACGAGGGGCCGTCCCCGTCCGATC	69	909	KAG6412492.1	Hypothetical protein	Uncharacterized protein
1439	KAG6409904.1	91.045	67	6	0	3	69	529	595	7.56e-20	95.1	KAG6409904.1	104	61	61	0	91.04	1	1	CAGAAGTACAGGCTGTATGTGAAGAGGATGCAGGGGTTGTCCAACGAAGGACCATCGCCGTCCGATC	CAGAAGTATAGGCTGTATGTGAAGAGGATGCAGGGGCTGTCCAACGAGGGGCCGTCCCCGTCCGATC	69	1170	KAG6409904.1	Hypothetical protein	Uncharacterized protein
1439	KAG6436776.1	89.062	64	7	0	3	66	457	520	1.37e-16	85.1	KAG6436776.1	93	57	57	0	89.06	1	1	CAGAAGTACAGGCTGTATGTGAAGAGGATGCAGGGGTTGTCCAACGAAGGACCATCGCCGTCCG	CAGAAATACAGGCTGTATGTGAAGAGGATGCAGGGTTTGTCCAACGAGGGGCCTTCCCCTTCCG	69	807	KAG6436776.1	Hypothetical protein	Uncharacterized protein
1444	KAG6428651.1	85.507	69	10	0	1	69	2037	2105	1.67e-15	80.6	KAG6428651.1	88	59	59	0	85.51	1	1	TGCAGAAGTAGCAGATTATCGTGCTAAAAGAGCTGCACTTTCTAGTTCAGATGCTTCAGGTAGGTCTTT	TGCAGAGGTTGCAGATTATCGTGCTAAAAAAACTGCACTTTCTAGCTCTGACGCTTCAGGCAAGACTTT	69	2508	KAG6428651.1	origin recognition complex subunit 1	K02603
1445	KAG6426534.1	92.453	53	4	0	2	54	128	76	5.82e-15	78.8	KAG6426534.1	86	49	49	0	92.45	1	-1	GCAGAAGTAGCCAAAGCTTTCTCCAATCGCCTTTTCTTCTTTTCAGCCTGTTT	GCAGAAGTAGCCAGAGCTTTTTCCAAACGCCTTTTTTTCTTTTCAGCCTGTTT	69	594	KAG6426534.1	Hypothetical protein	Uncharacterized protein
1446	KAG6387716.1	96.364	55	2	0	1	55	129	75	9.22e-19	91.5	KAG6387716.1	100	53	53	0	96.36	1	-1	TGCAGAAGTAGCCAAGGCCTTCTCCAAGCGTCTCTTTTTCTTCTCAGCCTGTTTA	TGCAGAAGTAGCTAATGCCTTCTCCAAGCGTCTCTTTTTCTTCTCAGCCTGTTTA	69	633	KAG6387716.1	Hypothetical protein	Uncharacterized protein
1446	KAG6409869.1	96.296	54	2	0	2	55	128	75	3.22e-18	89.7	KAG6409869.1	98	52	52	0	96.3	1	-1	GCAGAAGTAGCCAAGGCCTTCTCCAAGCGTCTCTTTTTCTTCTCAGCCTGTTTA	GCAGAAGTAGCTAATGCCTTCTCCAAGCGTCTCTTTTTCTTCTCAGCCTGTTTA	69	633	KAG6409869.1	Hypothetical protein	Uncharacterized protein
1446	KAG6390193.1	93.617	47	1	1	2	48	1739	1695	3.01e-12	69.8	KAG6390193.1	76	44	44	2	93.62	1	-1	GCAGAAGTAGCCAAGGCCTTCTCCAAGCGTCTCTTTTTCTTCTCAGC	GCAGAAGTAGCCAATGCC--CTCCAAGCGTCTCTTTTTCTTCTCAGC	69	2172	KAG6390193.1	Hypothetical protein	Uncharacterized protein
1449	KAG6384091.1	89.855	69	7	0	1	69	2222	2154	2.64e-19	94.2	KAG6384091.1	103	62	62	0	89.86	1	-1	TGCAGAAGTAGTTTCTTCTGCGAGGCGTTGATAAGACCCTTACACTCTGCATCCACCAACACATCCGTC	TGCAGAAGTAACTTCTTCTGCGAGGCGTTTATAACTCCCTTACATTCTGCATCCACCAACACCTCCGTC	69	2247	KAG6384091.1	diacylglycerol kinase (ATP) [EC:2.7.1.107]	K00901
1449	KAG6391886.1	89.855	69	7	0	1	69	2222	2154	2.64e-19	94.2	KAG6391886.1	103	62	62	0	89.86	1	-1	TGCAGAAGTAGTTTCTTCTGCGAGGCGTTGATAAGACCCTTACACTCTGCATCCACCAACACATCCGTC	TGCAGAAGTAACTTCTTCTGCGAGGCGTTTATAACTCCCTTACATTCTGCATCCACCAACACCTCCGTC	69	2247	KAG6391886.1	diacylglycerol kinase (ATP) [EC:2.7.1.107]	K00901
1460	KAG6436474.1	83.824	68	11	0	1	68	945	878	2.47e-13	74.3	KAG6436474.1	81	57	57	0	83.82	1	-1	TGCAGAAGTCATTTCTCCGGTCTGGAGTGCTTTAGGCCCATTAGAATCTAACTTTTTAGGAGCATCTG	TGCAGAAGTTATTTCTGCTGTCTGGATTGCTTCAGGCCTATTAGAATCTATCTGTTTACGAGTGTCTG	69	5970	KAG6436474.1	Hypothetical protein	Uncharacterized protein
1460	KAG6414661.1	81.159	69	13	0	1	69	1074	1006	3.67e-11	67.1	KAG6414661.1	73	56	56	0	81.16	1	-1	TGCAGAAGTCATTTCTCCGGTCTGGAGTGCTTTAGGCCCATTAGAATCTAACTTTTTAGGAGCATCTGC	TGCAGAAGCCATTTCTACAGTCTTGATTGCTTGAGGCTCATTAGAATCTATCTGCTTACGAGTGTCTGC	69	5925	KAG6414661.1	Hypothetical protein	Uncharacterized protein
1468	KAG6421262.1	86.885	61	8	0	1	61	711	651	7.08e-14	75.2	KAG6421262.1	82	53	53	0	86.89	1	-1	TGCAGAAGTCTCGTTCTTCTGACAGCCACTAAGCAAGATCCCTTCATCCGCCTTCAGTGGC	TGCAGACGTCTCGTTCGTTTGGCAGCCACTGAGCAGGATCCCTTCATCCGGCTTCAGCGGC	69	942	KAG6421262.1	Hypothetical protein	Uncharacterized protein
1468	KAG6424296.1	86.885	61	8	0	1	61	468	408	7.08e-14	75.2	KAG6424296.1	82	53	53	0	86.89	1	-1	TGCAGAAGTCTCGTTCTTCTGACAGCCACTAAGCAAGATCCCTTCATCCGCCTTCAGTGGC	TGCAGACGTCTCGTTCGTTTGGCAGCCACTGAGCAGGATCCCTTCATCCGGCTTCAGCGGC	69	672	KAG6424296.1	Hypothetical protein	Uncharacterized protein
1469	KAG6431555.1	90.476	63	6	0	1	63	2703	2641	1.12e-17	87.8	KAG6431555.1	96	57	57	0	90.48	1	-1	TGCAGAAGTCTCTTCATCTTCAACAACGTGTTCTTCCTTTTCTCCTTTCTTATCTGTTACAGA	TGCAGAAGTCTCATCATCTTCAACAACAAGTTCTTCCTTTTGTCCCTTCTTATCTGTTAAAGA	69	3129	KAG6431555.1	sucrose-phosphate synthase [EC:2.4.1.14]	K00696
1469	KAG6428463.1	90.323	62	6	0	2	63	2999	2938	3.92e-17	86	KAG6428463.1	94	56	56	0	90.32	1	-1	GCAGAAGTCTCTTCATCTTCAACAACGTGTTCTTCCTTTTCTCCTTTCTTATCTGTTACAGA	GCAGAAGTCTCTTCATCTTCAACAACAAGTTCTTCCTTTTGTCCCTTCTTATCGGTTAAAGA	69	3426	KAG6428463.1	Hypothetical protein	Uncharacterized protein
1469	KAG6411174.1	84.615	65	7	1	2	63	2672	2608	8.63e-13	71.6	KAG6411174.1	78	55	55	3	84.62	1	-1	GCAGAAGTCTCTTCATCTTCAACAAC---GTGTTCTTCCTTTTCTCCTTTCTTATCTGTTACAGA	GCTGAAGTTTCTTCATCTTCAACAACAATGTGTTCTTCCTTCCCTCCTTTTTTATCAGTTATAGA	69	3117	KAG6411174.1	sucrose-phosphate synthase [EC:2.4.1.14]	K00696
1470	KAG6434482.1	88.235	68	8	0	1	68	371	304	1.12e-17	87.8	KAG6434482.1	96	60	60	0	88.24	1	-1	TGCAGAAGTCTTGCGAGTCTCTTCTGCCTACTGCTCCAGAAATTCTTGACATCGTTGTCTGTTCTTCC	TGCAGAATCCTAGCAAGTCTCTTCTGTCGACTACTCCAGAAATTCTTGACGTCGTTGTCTGTTCTTCC	69	885	KAG6434482.1	transcription factor MYB, plant	K09422
1470	KAG6437816.1	88.235	68	8	0	1	68	374	307	1.12e-17	87.8	KAG6437816.1	96	60	60	0	88.24	1	-1	TGCAGAAGTCTTGCGAGTCTCTTCTGCCTACTGCTCCAGAAATTCTTGACATCGTTGTCTGTTCTTCC	TGCAGAATCCTAGCAAGTCTCTTCTGTCGACTACTCCAGAAATTCTTGACGTCGTTGTCTGTTCTTCC	69	876	KAG6437816.1	transcription factor MYB, plant	K09422
1470	KAG6400494.1	89.231	65	7	0	4	68	329	265	3.92e-17	86.9	KAG6400494.1	95	58	58	0	89.23	1	-1	AGAAGTCTTGCGAGTCTCTTCTGCCTACTGCTCCAGAAATTCTTGACATCGTTGTCTGTTCTTCC	AGAATCCTAGCAAGCCTCTTCTGCCGACTGCTCCAGAAATTCTTGACGTCGTTGTCTGTTCTTCC	69	792	KAG6400494.1	transcription factor MYB, plant	K09422
1475	KAG6397074.1	89.855	69	7	0	1	69	2324	2256	2.64e-19	94.2	KAG6397074.1	103	62	62	0	89.86	1	-1	TGCAGAAGTGAACTTGGCGGACCAGGAGATATATTCTGGAGCAAAACCATTGGCAGAAGAGTGCTTGCA	TGCAGAAGTGAGCTTGGCGGACCGGGAGATACATTCTGGAATAAAACCATAGGCAAAAGAGTGCTTGCA	69	2733	KAG6397074.1	AP-1 complex subunit beta-1	K12392
1475	KAG6399342.1	86.957	69	9	0	1	69	2276	2208	1.37e-16	85.1	KAG6399342.1	93	60	60	0	86.96	1	-1	TGCAGAAGTGAACTTGGCGGACCAGGAGATATATTCTGGAGCAAAACCATTGGCAGAAGAGTGCTTGCA	TGCAGAAGTGAGCTTGGTGGACCGGGAGATACGTTCTGGAATAAAACCATAGGCAAAAGAGTGCTTGCA	69	2685	KAG6399342.1	AP-1 complex subunit beta-1	K12392
1481	KAG6425692.1	89.286	56	6	0	7	62	169	224	7.08e-14	75.2	KAG6425692.1	82	50	50	0	89.29	1	1	AGTGACTGTCGATATCACTGCATGCTATCAAGAGAAGAAGACAGACAAAAACTTGG	AGTGACTGCCGATATCACTGCATGCTCTCGAGAGAAGAAGAAAGGCAGAAACTTGG	69	954	KAG6425692.1	post-GPI attachment to proteins factor 3	K23553
1481	KAG6391937.1	85.484	62	9	0	1	62	370	431	8.63e-13	72.5	KAG6391937.1	79	53	53	0	85.48	1	1	TGCAGAAGTGACTGTCGATATCACTGCATGCTATCAAGAGAAGAAGACAGACAAAAACTTGG	TGCCGCAGTGACTGTCGTTACCACTGCATGCTCTCTAGAGAAGAAGAAAGACAGGAACTTGG	69	1161	KAG6391937.1	post-GPI attachment to proteins factor 3	K23553
1481	KAG6422587.1	87.5	56	7	0	7	62	244	299	3.01e-12	70.7	KAG6422587.1	77	49	49	0	87.5	1	1	AGTGACTGTCGATATCACTGCATGCTATCAAGAGAAGAAGACAGACAAAAACTTGG	AGTGACTGCCGATATCACTGCATGCTCTCGAGAGAAGAAGAACGGCAGAAACTTGG	69	1044	KAG6422587.1	post-GPI attachment to proteins factor 3	K23553
1482	KAG6432528.1	91.667	48	4	0	14	61	664	711	3.01e-12	69.8	KAG6432528.1	76	44	44	0	91.67	1	1	AAAAGAGGGAGAAAAGTAGTGAAAAATATTGAAAACGTAGCTGCTGTT	AAAAGAGGGAGAAAAGAAGTGAAAAATATTGGTAAGGTAGCTGCTGTT	69	6777	KAG6432528.1	Hypothetical protein	Uncharacterized protein
1482	KAG6435848.1	91.667	48	4	0	14	61	664	711	3.01e-12	69.8	KAG6435848.1	76	44	44	0	91.67	1	1	AAAAGAGGGAGAAAAGTAGTGAAAAATATTGAAAACGTAGCTGCTGTT	AAAAGAGGGAGAAAAGAAGTGAAAAATATTGGTAAGGTAGCTGCTGTT	69	6552	KAG6435848.1	Hypothetical protein	Uncharacterized protein
1485	KAG6384921.1	83.824	68	11	0	2	69	203	136	2.47e-13	74.3	KAG6384921.1	81	57	57	0	83.82	1	-1	GCAGAAGTGCAATTACTTCTACAATCTAATGATGCAGAATTCGAAACTACTGTTTGTTTCTTCTTCTT	GCAGAGCTACAATTACTCGAAGAATCTAATGATGCATTGTCCGAAACTACTGTTTGTTTCTTCTTCTT	69	1869	KAG6384921.1	Hypothetical protein	Uncharacterized protein
1485	KAG6386725.1	83.824	68	11	0	2	69	212	145	2.47e-13	74.3	KAG6386725.1	81	57	57	0	83.82	1	-1	GCAGAAGTGCAATTACTTCTACAATCTAATGATGCAGAATTCGAAACTACTGTTTGTTTCTTCTTCTT	GCAGAGCTACAATTACTCGAAGAATCTAATGATGCATTGTCCGAAACTACTGTTTGTTTCTTCTTCTT	69	1881	KAG6386725.1	Hypothetical protein	Uncharacterized protein
1486	KAG6391052.1	82.812	64	11	0	1	64	1158	1221	3.67e-11	67.1	KAG6391052.1	73	53	53	0	82.81	1	1	TGCAGAAGTGCCATATTCTTCTCATTCCCTTTTTAGGATCCCCTCCTCTAATCATGTTGCAAAT	TGCAGAAGCCTCATATTCTGTTCCTTCCCTTTTTAAGGTCCCCTCTTCTGATCATGGTGCAAAT	69	2592	KAG6391052.1	CCR4-NOT transcription complex subunit 4 [EC:2.3.2.27]	K10643
1489	KAG6405979.1	84.058	69	11	0	1	69	2221	2289	7.08e-14	76.1	KAG6405979.1	83	58	58	0	84.06	1	1	TGCAGAAGTGGCTCCGGATTGGTTCGGATCTGGGGAACATCTCCTGACTCCATCGATGCTGCTGAGGAT	TGCAGAAGTGGTTCTGAAATTGTTCGCATCTGGGGCACATCTCCTGATTCTATTGATGCTGCAGAGGAT	69	3540	KAG6405979.1	carbamoyl-phosphate synthase large subunit [EC:6.3.5.5]	K01955
1489	KAG6408313.1	84.058	69	11	0	1	69	2386	2454	7.08e-14	76.1	KAG6408313.1	83	58	58	0	84.06	1	1	TGCAGAAGTGGCTCCGGATTGGTTCGGATCTGGGGAACATCTCCTGACTCCATCGATGCTGCTGAGGAT	TGCAGAAGTGGTTCTGAAATTGTTCGCATCTGGGGCACATCTCCTGATTCTATTGATGCTGCGGAGGAT	69	3702	KAG6408313.1	carbamoyl-phosphate synthase large subunit [EC:6.3.5.5]	K01955
1489	KAG6408282.1	84.058	69	11	0	1	69	2386	2454	7.08e-14	76.1	KAG6408282.1	83	58	58	0	84.06	1	1	TGCAGAAGTGGCTCCGGATTGGTTCGGATCTGGGGAACATCTCCTGACTCCATCGATGCTGCTGAGGAT	TGCAGAAGTGGTTCTGAAATTGTTCGCATCTGGGGCACATCTCCTGATTCTATTGATGCTGCGGAGGAT	69	3702	KAG6408282.1	carbamoyl-phosphate synthase large subunit [EC:6.3.5.5]	K01955
1493	KAG6430862.1	89.855	69	7	0	1	69	457	389	2.64e-19	94.2	KAG6430862.1	103	62	62	0	89.86	1	-1	TGCAGAAGTTACGAATGCTGGGAATGTAATCAGCAAGTAGAAGACGGATGCACCGGGAGTGTCCATTTA	TGCAGAAGTTAGGGATGCTGGGAATGTAATCAGCAAGGAGGAGACGGATGCACCGGGAATGCCCGTTTA	69	1623	KAG6430862.1	E3 ubiquitin-protein ligase XBAT32/33 [EC:2.3.2.27]	K19044
1493	KAG6427813.1	88.406	69	8	0	1	69	457	389	3.22e-18	89.7	KAG6427813.1	98	61	61	0	88.41	1	-1	TGCAGAAGTTACGAATGCTGGGAATGTAATCAGCAAGTAGAAGACGGATGCACCGGGAGTGTCCATTTA	TGCAGAAGTTAGGAATGCTGGGAATGTAATCAGCAAGGAGGAGACGAATGCACGGGGAATGCCCGTTTA	69	1530	KAG6427813.1	E3 ubiquitin-protein ligase XBAT32/33 [EC:2.3.2.27]	K19044
1496	KAG6384720.1	95.652	69	3	0	1	69	375	443	9.84e-25	112	KAG6384720.1	123	66	66	0	95.65	1	1	TGCAGAAGTTAGGCTTCCACCATCAATCTCCACACCTGAGAAGAAGAAGAGAGTTGTTGAGCTTGTCAA	TGCAGAAGTGAGGCTTCCACCATCCATCTCCACAGCTGAGAAGAAGAAGAGAGTTGTTGAGCTTGTCAA	69	1809	KAG6384720.1	Hypothetical protein	Uncharacterized protein
1498	KAG6422164.1	91.304	69	6	0	1	69	1874	1806	6.21e-21	98.7	KAG6422164.1	108	63	63	0	91.3	1	-1	TGCAGAAGTTCAACCGTCTTGCATAGGGCTTTGAACATTTCCTTGTCCTCTGATATCACAAAAGCCACT	TGTAGAAGTTCAACTGTCCTGCATAGAGCTTTGAACATTTCCTTGTCCTCAGATATCACAAAGGCCACT	69	3219	KAG6422164.1	methionine S-methyltransferase [EC:2.1.1.12]	K08247
1498	KAG6425234.1	91.304	69	6	0	1	69	1874	1806	6.21e-21	98.7	KAG6425234.1	108	63	63	0	91.3	1	-1	TGCAGAAGTTCAACCGTCTTGCATAGGGCTTTGAACATTTCCTTGTCCTCTGATATCACAAAAGCCACT	TGTAGAAGTTCAACTGTCCTGCATAGAGCTTTGAACATTTCCTTGTCCTCGGATATCACAAAGGCCACT	69	3219	KAG6425234.1	methionine S-methyltransferase [EC:2.1.1.12]	K08247
1498	KAG6408651.1	86.957	69	9	0	1	69	1913	1845	1.37e-16	85.1	KAG6408651.1	93	60	60	0	86.96	1	-1	TGCAGAAGTTCAACCGTCTTGCATAGGGCTTTGAACATTTCCTTGTCCTCTGATATCACAAAAGCCACT	TGTAGAAGTTCGACTGTCCTGCACAGAGCTTTGAACATTTCCTCGTCCTCTGATATCACAACGGCCACT	69	3270	KAG6408651.1	methionine S-methyltransferase [EC:2.1.1.12]	K08247
1501	KAG6427882.1	93.103	58	4	0	10	67	4089	4032	1.12e-17	87.8	KAG6427882.1	96	54	54	0	93.1	1	-1	TCAGCCAAACGTCTCAATGAGGAAACCCTTTTAGATGCTCATGAACTTGGCTACAAAT	TCAGCCGAATGTCTCGATGAGGAAACCCTTGTAGATGCTCATGAACTTGGCTACAAAT	69	4089	KAG6427882.1	polyribonucleotide nucleotidyltransferase [EC:2.7.7.8]	K00962
1501	KAG6430928.1	93.103	58	4	0	10	67	1116	1059	1.12e-17	87.8	KAG6430928.1	96	54	54	0	93.1	1	-1	TCAGCCAAACGTCTCAATGAGGAAACCCTTTTAGATGCTCATGAACTTGGCTACAAAT	TCAGCCGAATGTCTCGATGAGGAAACCCTTGTAGATGCTCATGAACTTGGCTACAAAT	69	1116	KAG6430928.1	replication factor C subunit 3/5	K10756
1501	KAG6433547.1	93.103	58	4	0	10	67	1065	1008	1.12e-17	87.8	KAG6433547.1	96	54	54	0	93.1	1	-1	TCAGCCAAACGTCTCAATGAGGAAACCCTTTTAGATGCTCATGAACTTGGCTACAAAT	TCAGCCGAATGTCTCGATGAGGAAACCCTTGTAGATGCTCATGAACTTGGCTACAAAT	69	1065	KAG6433547.1	replication factor C subunit 3/5	K10756
1502	KAG6386395.1	90.323	62	6	0	1	62	1637	1576	3.92e-17	86	KAG6386395.1	94	56	56	0	90.32	1	-1	TGCAGAAGTTCAGGCTGATCATTCAACAGTTTCTCACAAGTTGACACCTGTTGCATCTTTCC	TGCAGAAGTTCAGGCTGATCATTTAACAGTTTCTCACGATTTGACACCTCTTGTATCTTCCC	69	5544	KAG6386395.1	E3 ubiquitin-protein ligase TRIP12 [EC:2.3.2.26]	K10590
1502	KAG6411974.1	90.323	62	6	0	1	62	1628	1567	3.92e-17	86	KAG6411974.1	94	56	56	0	90.32	1	-1	TGCAGAAGTTCAGGCTGATCATTCAACAGTTTCTCACAAGTTGACACCTGTTGCATCTTTCC	TGCAGAAGTTCAGGCTGATCATTTAACAGTTTCTCACGATTTGACACCTCTTGTATCTTCCC	69	5475	KAG6411974.1	E3 ubiquitin-protein ligase TRIP12 [EC:2.3.2.26]	K10590
1509	KAG6424046.1	91.045	67	6	0	1	67	2740	2674	7.56e-20	95.1	KAG6424046.1	104	61	61	0	91.04	1	-1	TGCAGAAGTTGAGCAAGAGCAATGGTAAACTTGCTCTCATGGGTATCATAAGAATGCCAGTTGCAAG	TGCAGAAGTTAAGCAAGAGCATTGGTAAGCTTGCTCTCATGGGTATCACAAGGATGCCAGCTGCAAG	69	3906	KAG6424046.1	Hypothetical protein	Uncharacterized protein
1509	KAG6421006.1	89.552	67	7	0	1	67	2875	2809	3.22e-18	90.6	KAG6421006.1	99	60	60	0	89.55	1	-1	TGCAGAAGTTGAGCAAGAGCAATGGTAAACTTGCTCTCATGGGTATCATAAGAATGCCAGTTGCAAG	TGCAGAAGTTAAGCAAGAGCATTGGTAAGCTTGCTCTCATGGGTATCACAAGGACGCCAGCTGCAAG	69	3885	KAG6421006.1	Hypothetical protein	Uncharacterized protein
1515	KAG6395555.1	85.246	61	9	0	7	67	129	69	3.01e-12	70.7	KAG6395555.1	77	52	52	0	85.25	1	-1	AGTTGTGTGGAAGCATGAATAAGCTGTTGGGTCTCCCATGCCCAAAGAAATCAGTTTTTTA	AGTTGTTCGAAAACACGAATAAGCTGTTGGGTCTCCCATGCCCAGAGAAATCACCTTCTTA	69	1197	KAG6395555.1	tyrosine aminotransferase [EC:2.6.1.5]	K00815
1516	KAG6395555.1	85.246	61	9	0	7	67	129	69	3.01e-12	70.7	KAG6395555.1	77	52	52	0	85.25	1	-1	AGTTGTGTGGAAGCATGAATAAGCTGTTGGGTCTCCCATGCCCAAAGAAATCAGTTTTTTA	AGTTGTTCGAAAACACGAATAAGCTGTTGGGTCTCCCATGCCCAGAGAAATCACCTTCTTA	69	1197	KAG6395555.1	tyrosine aminotransferase [EC:2.6.1.5]	K00815
1520	KAG6384212.1	84.375	64	10	0	1	64	720	783	8.63e-13	71.6	KAG6384212.1	78	54	54	0	84.38	1	1	TGCAGAAGTTTCTGATGTTATTCACGATGTTGGATTTTGGAACAATGTAGAAGCTTCTCATTCA	TGCAGAAGTGGCTGGTGTTGTTCAGGATGTTGGATTTTGGAATGAAGTAGAGGCTGCTCATTCA	69	1410	KAG6384212.1	Hypothetical protein	Uncharacterized protein
1520	KAG6426477.1	84.375	64	10	0	1	64	1386	1449	8.63e-13	71.6	KAG6426477.1	78	54	54	0	84.38	1	1	TGCAGAAGTTTCTGATGTTATTCACGATGTTGGATTTTGGAACAATGTAGAAGCTTCTCATTCA	TGCAGAAGTGGCTGGTGTTGTTCAGGATGTTGGATTTTGGAATGAAGTAGAGGCTGCTCATTCA	69	2217	KAG6426477.1	Hypothetical protein	Uncharacterized protein
1520	KAG6429536.1	84.375	64	10	0	1	64	978	1041	8.63e-13	71.6	KAG6429536.1	78	54	54	0	84.38	1	1	TGCAGAAGTTTCTGATGTTATTCACGATGTTGGATTTTGGAACAATGTAGAAGCTTCTCATTCA	TGCAGAAGTGGCTGGTGTTGTTCAGGATGTTGGATTTTGGAATGAAGTAGAGGCTGCTCATTCA	69	1803	KAG6429536.1	Hypothetical protein	Uncharacterized protein
1524	KAG6434261.1	89.552	67	7	0	1	67	946	880	3.22e-18	90.6	KAG6434261.1	99	60	60	0	89.55	1	-1	TGCAGAAGTTTGGTATACAAGCTCCTCCATCTGGGTTTTGTTGTTCCTTCCATATCCGACCCGTAAC	TGCAGAAGTTGGGTATGCAAGCTCCACCATCTGGGTTCTGTTGTTCCTTCCATATTCGCCCCGTCAC	69	951	KAG6434261.1	E3 ubiquitin-protein ligase SIAH1 [EC:2.3.2.27]	K04506
1524	KAG6430249.1	88.06	67	8	0	1	67	946	880	3.92e-17	86	KAG6430249.1	94	59	59	0	88.06	1	-1	TGCAGAAGTTTGGTATACAAGCTCCTCCATCTGGGTTTTGTTGTTCCTTCCATATCCGACCCGTAAC	TGCAGAAATTGGGTATGCAAGCTCCACCATCTGGGTTCTGTTGTTCCTTCCATATTCGTCCCGTTAC	69	951	KAG6430249.1	E3 ubiquitin-protein ligase SIAH1 [EC:2.3.2.27]	K04506
1524	KAG6427210.1	90.909	55	5	0	1	55	979	925	2.03e-14	77.9	KAG6427210.1	85	50	50	0	90.91	1	-1	TGCAGAAGTTTGGTATACAAGCTCCTCCATCTGGGTTTTGTTGTTCCTTCCATAT	TGCAGAAATTGGGTATGCAAGCTCCACCATCTGGGTTCTGTTGTTCCTTCCATAT	69	984	KAG6427210.1	E3 ubiquitin-protein ligase SIAH1 [EC:2.3.2.27]	K04506
1525	KAG6421321.1	91.045	67	6	0	1	67	2345	2411	7.56e-20	95.1	KAG6421321.1	104	61	61	0	91.04	1	1	TGCAGAAGTTTGGTATCCTTCCAGAGATGTACCAAGTTGGTTCTACAAAGTTATTCTTCCGAAAAAG	TGCAGAAGTTTGGGATCGTGCCAGAGATGTACCAAGTTGGTTATACAAAGTTATACTTTCGAAAAAG	69	4047	KAG6421321.1	myosin V	K10357
1525	KAG6424358.1	91.045	67	6	0	1	67	2282	2348	7.56e-20	95.1	KAG6424358.1	104	61	61	0	91.04	1	1	TGCAGAAGTTTGGTATCCTTCCAGAGATGTACCAAGTTGGTTCTACAAAGTTATTCTTCCGAAAAAG	TGCAGAAGTTTGGGATCGTGCCAGAGATGTACCAAGTTGGTTATACAAAGTTATACTTTCGAAAAAG	69	3309	KAG6424358.1	myosin V	K10357
1525	KAG6385503.1	88.235	68	8	0	1	68	1514	1581	1.12e-17	87.8	KAG6385503.1	96	60	60	0	88.24	1	1	TGCAGAAGTTTGGTATCCTTCCAGAGATGTACCAAGTTGGTTCTACAAAGTTATTCTTCCGAAAAAGA	TGCAGAAGTTCGGTATCTTGCCAGAGATGTACCAAGTTGGCTATACAAAGTTATACTTTCGAAAAGGA	69	2592	KAG6385503.1	Hypothetical protein	Uncharacterized protein
1531	KAG6437707.1	86.567	67	9	0	3	69	381	447	1.67e-15	81.5	KAG6437707.1	89	58	58	0	86.57	1	1	CAGAATAAACGTGACGTTTTTTGACAAAGATGGTCACGAGACACATATAAAGGTCCCAGTTGGAATG	CAGAATAAATGTGATATTTTGCGACAAAGATGGAGAAGAGACGCATATAAAGGTCCCAGTTGGAATG	69	738	KAG6437707.1	ferredoxin-2, mitochondrial	K22071
1531	KAG6434328.1	85.938	64	9	0	6	69	162	225	7.08e-14	76.1	KAG6434328.1	83	55	55	0	85.94	1	1	AATAAACGTGACGTTTTTTGACAAAGATGGTCACGAGACACATATAAAGGTCCCAGTTGGAATG	AATAAATGTGACATTTTGCGACAAAGATGGAGAAGAGACGCATATAAAGGTCCCAATTGGAATG	69	516	KAG6434328.1	ferredoxin-2, mitochondrial	K22071
1533	KAG6416883.1	92	50	4	0	20	69	804	755	2.47e-13	73.4	KAG6416883.1	80	46	46	0	92	1	-1	TACAGGTTGTAAGGCAAGACCAGCCCGAAATTTCCGTATCATATCAGCTT	TATAGGCTGTAAGGCAAGACCAGCCCGAAATTTCTTTATCATATCAGCTT	69	1539	KAG6416883.1	glutamate--cysteine ligase [EC:6.3.2.2]	K01919
1533	KAG6419482.1	90	50	5	0	20	69	756	707	1.05e-11	68.9	KAG6419482.1	75	45	45	0	90	1	-1	TACAGGTTGTAAGGCAAGACCAGCCCGAAATTTCCGTATCATATCAGCTT	TATAGGCTGTAAGGCAAGACCAGCCCGGAATTTCTTTATCATATCAGCTT	69	1491	KAG6419482.1	glutamate--cysteine ligase [EC:6.3.2.2]	K01919
1535	KAG6421175.1	95.161	62	3	0	4	65	914	975	6.21e-21	99.6	KAG6421175.1	109	59	59	0	95.16	1	1	AGAATAAATGGAGAGGAATACCGACAAGACTGAATAACATTCCTCACTCTAGAGAAATCAGG	AGAATAAATGGAGAGGAATACCGACGAAACTAAATAACATTCCTCACTCTAGAGAAATCAGG	69	1779	KAG6421175.1	adenylate kinase [EC:2.7.4.3]	K00939
1535	KAG6424210.1	95.161	62	3	0	4	65	689	750	6.21e-21	99.6	KAG6424210.1	109	59	59	0	95.16	1	1	AGAATAAATGGAGAGGAATACCGACAAGACTGAATAACATTCCTCACTCTAGAGAAATCAGG	AGAATAAATGGAGAGGAATACCGACGAAACTAAATAACATTCCTCACTCTAGAGAAATCAGG	69	1554	KAG6424210.1	adenylate kinase [EC:2.7.4.3]	K00939
1546	KAG6407193.1	92.754	69	5	0	1	69	246	178	5.1e-22	103	KAG6407193.1	113	64	64	0	92.75	1	-1	TGCAGAATAAGCTGAGAGGAAGTCTATATATCTTTTGCCTTCCGGATCCCAGATAGACGATCCTTTGGC	TGCAGAATAAGCTGAGAGGAAGTCTATATATCGTTTGCCTTCCGGGTCCCATATGGATGATCCTTTGGC	69	1425	KAG6407193.1	ornithine--oxo-acid transaminase [EC:2.6.1.13]	K00819
1546	KAG6405010.1	91.304	69	6	0	1	69	246	178	6.21e-21	98.7	KAG6405010.1	108	63	63	0	91.3	1	-1	TGCAGAATAAGCTGAGAGGAAGTCTATATATCTTTTGCCTTCCGGATCCCAGATAGACGATCCTTTGGC	TGCAGAATAAGCTGAGAGGAAGTCTATGTATCGTTTGCCTTCCGGGTCCCATATGGATGATCCTTTGGC	69	1422	KAG6405010.1	ornithine--oxo-acid transaminase [EC:2.6.1.13]	K00819
1551	KAG6413533.1	90.769	65	6	0	3	67	55	119	9.22e-19	91.5	KAG6413533.1	100	59	59	0	90.77	1	1	CAGAATAATCTGCTGTACATACAGAGTTTTACCAAGGCAGATGATGCGCTCAAGCTTCATCATAT	CAGAATAATCCGTTGTACATACAGAGTTTTACCAAGGGGGATGATTCGCTCAAGCTTCATCACAT	69	456	KAG6413533.1	trafficking protein particle complex subunit 2	K20301
1551	KAG6386392.1	85.938	64	9	0	4	67	32	95	7.08e-14	76.1	KAG6386392.1	83	55	55	0	85.94	1	1	AGAATAATCTGCTGTACATACAGAGTTTTACCAAGGCAGATGATGCGCTCAAGCTTCATCATAT	AGAATAATCCGTTATACATACAAAGTTTTACTGAATCAGATGATGCACTCAAGCTTCATCATAT	69	432	KAG6386392.1	trafficking protein particle complex subunit 2	K20301
1551	KAG6411979.1	85.938	64	9	0	4	67	32	95	7.08e-14	76.1	KAG6411979.1	83	55	55	0	85.94	1	1	AGAATAATCTGCTGTACATACAGAGTTTTACCAAGGCAGATGATGCGCTCAAGCTTCATCATAT	AGAATAATCCGTTATACATACAAAGTTTTACTGAATCAGATGATGCACTCAAGCTTCATCATAT	69	444	KAG6411979.1	trafficking protein particle complex subunit 2	K20301
1569	KAG6428532.1	94.203	69	4	0	1	69	1931	1863	1.2e-23	107	KAG6428532.1	118	65	65	0	94.2	1	-1	TGCAGAATACCAGAAACAGCAGTTGTAAGCTTTCCCCTAACATCATCAGGAACTGCATCTTGCAAAGCT	TGCAGGATACCAGAAACAGCAGTTGTGAGCTTTCCTCTAACATCATCAGGAACAGCATCTTGCAAAGCT	69	5211	KAG6428532.1	uncharacterized protein	K07052
1569	KAG6431626.1	94.203	69	4	0	1	69	1928	1860	1.2e-23	107	KAG6431626.1	118	65	65	0	94.2	1	-1	TGCAGAATACCAGAAACAGCAGTTGTAAGCTTTCCCCTAACATCATCAGGAACTGCATCTTGCAAAGCT	TGCAGGATACCAGAAACAGCAGTTGTGAGCTTTCCTCTAACATCATCAGGAACAGCATCTTGCAAAGCT	69	5253	KAG6431626.1	uncharacterized protein	K07052
1570	KAG6428532.1	92.754	69	5	0	1	69	1931	1863	5.1e-22	103	KAG6428532.1	113	64	64	0	92.75	1	-1	TGCAGAATACCAGAAACAGCAGTTGTAAGCTTTCCCCTAACATCATCAGGAACTGCATCTTGCAACGCT	TGCAGGATACCAGAAACAGCAGTTGTGAGCTTTCCTCTAACATCATCAGGAACAGCATCTTGCAAAGCT	69	5211	KAG6428532.1	uncharacterized protein	K07052
1570	KAG6431626.1	92.754	69	5	0	1	69	1928	1860	5.1e-22	103	KAG6431626.1	113	64	64	0	92.75	1	-1	TGCAGAATACCAGAAACAGCAGTTGTAAGCTTTCCCCTAACATCATCAGGAACTGCATCTTGCAACGCT	TGCAGGATACCAGAAACAGCAGTTGTGAGCTTTCCTCTAACATCATCAGGAACAGCATCTTGCAAAGCT	69	5253	KAG6431626.1	uncharacterized protein	K07052
1579	KAG6431255.1	85.075	67	9	1	1	67	1059	1124	2.47e-13	73.4	KAG6431255.1	80	57	57	1	85.07	1	1	TGCAGAATACTGTATTTGGTGGAAAGCCTACAGCACCTGATTACAACCATATCGCTTGTGCTGTGTT	TGCA-AACACTGTATTTGGTGGAAAGCCAATGGCACCTGATTACAGCAATATTGCCTGTGCCGTGTT	69	1488	KAG6431255.1	glutathione reductase (NADPH) [EC:1.8.1.7]	K00383
1579	KAG6428198.1	83.582	67	10	1	1	67	1629	1694	1.05e-11	68.9	KAG6428198.1	75	56	56	1	83.58	1	1	TGCAGAATACTGTATTTGGTGGAAAGCCTACAGCACCTGATTACAACCATATCGCTTGTGCTGTGTT	TGCA-AACACTGTATTTGGTGGAAAGCCAATGACACCTGATTACAGCAATATTGCCTGTGCCGTGTT	69	2121	KAG6428198.1	glutathione reductase (NADPH) [EC:1.8.1.7]	K00383
1579	KAG6432080.1	82.812	64	11	0	6	69	1192	1255	3.67e-11	67.1	KAG6432080.1	73	53	53	0	82.81	1	1	AATACTGTATTTGGTGGAAAGCCTACAGCACCTGATTACAACCATATCGCTTGTGCTGTGTTTT	AACACTGTATTTGGAGGAAAGCCAATGGCACCCGATTACAGTAATATTGCTTGTGCCGTGTTTT	69	1623	KAG6432080.1	glutathione reductase (NADPH) [EC:1.8.1.7]	K00383
1580	KAG6400435.1	89.855	69	7	0	1	69	1352	1420	2.64e-19	94.2	KAG6400435.1	103	62	62	0	89.86	1	1	TGCAGAATACTGTGAGAAGTCGTATCTTCACAGTGAGCAAAAACAAATGTGAGACCACTGCCAACTTAT	TGCAGAATACTGTGAGAAGTCTTACCTTCACAGCGAGGAAAAACAAATGTGAGTCCATTGCCATCTTAT	69	2169	KAG6400435.1	rhamnogalacturonan II specific xylosyltransferase [EC:2.4.2.-]	K11714
1580	KAG6437636.1	91.837	49	4	0	1	49	129	177	8.63e-13	71.6	KAG6437636.1	78	45	45	0	91.84	1	1	TGCAGAATACTGTGAGAAGTCGTATCTTCACAGTGAGCAAAAACAAATG	TGCAGAATACTGTGAGAAGTCTTACCTTCACAGTGAGGAAAAGCAAATG	69	885	KAG6437636.1	Hypothetical protein	Uncharacterized protein
1580	KAG6402677.1	89.796	49	5	0	1	49	129	177	3.67e-11	67.1	KAG6402677.1	73	44	44	0	89.8	1	1	TGCAGAATACTGTGAGAAGTCGTATCTTCACAGTGAGCAAAAACAAATG	TGCAGAATACTGTGAGAAGTCTTACCTTCACAGCGCGGAAAAACAAATG	69	789	KAG6402677.1	Hypothetical protein	Uncharacterized protein
1618	KAG6428260.1	87.719	57	7	0	8	64	5526	5582	8.63e-13	72.5	KAG6428260.1	79	50	50	0	87.72	1	1	TATCATGGAGCAGCATCAACTACAAAAGCTACTTGATGAGGCTCATCAACATAGACA	TATCATTGAGCAGCATCAACTGCAAAAGTTGATTGAGGAAGCTCATCAACATAGACA	69	6066	KAG6428260.1	kinesin family member 15	K10400
1618	KAG6431328.1	87.719	57	7	0	8	64	5526	5582	8.63e-13	72.5	KAG6431328.1	79	50	50	0	87.72	1	1	TATCATGGAGCAGCATCAACTACAAAAGCTACTTGATGAGGCTCATCAACATAGACA	TATCATTGAGCAGCATCAACTGCAAAAGTTGATTGAGGAAGCTCATCAACATAGACA	69	6063	KAG6431328.1	kinesin family member 15	K10400
1625	KAG6412529.1	87.5	64	8	0	1	64	465	528	1.67e-15	80.6	KAG6412529.1	88	56	56	0	87.5	1	1	TGCAGAATATGAGCGTCGCAGGGAGAACTTTTTCAAGGAGATAGAAATTGTTTTTGCAGATGTG	TGCGGAATACGAGCGTCGTAGAGAGAACTTTTTCAATGAGATAGAGATTGTTGTTGCTGATGTG	69	1080	KAG6412529.1	Hypothetical protein	Uncharacterized protein
1629	KAG6436592.1	89.552	67	7	0	3	69	5083	5149	3.22e-18	90.6	KAG6436592.1	99	60	60	0	89.55	1	1	CAGAATATGTATGCACAGTTGTTGCCTCTTGCTTTACCAGCACCGCCAATGCCTGGTATGGGAGGGG	CAGAATATGTATGCCCAGCTGTTGCCTCTTGCTTTACCAGCCCCGCCTATGCCAGGCATGGGTGGGG	69	5235	KAG6436592.1	clathrin heavy chain	K04646
1629	KAG6393554.1	83.333	78	4	2	1	69	4978	5055	4.77e-16	82.4	KAG6393554.1	90	65	65	9	83.33	1	1	TGCAGAATATGTATGCACAGTTGTTGCCTCTTGCTTTACCAGCACCGCCA---ATG------CCTGGTATGGGAGGGG	TGCAGAATATGTACGCCCAGTTGTTGCCTCTTGCTTTACCAGCCCCGCCAGGCATGGGTGGTCCGGGTATGGGAGGGG	69	5172	KAG6393554.1	clathrin heavy chain	K04646
1629	KAG6433287.1	87.692	65	8	0	3	67	4468	4532	4.77e-16	82.4	KAG6433287.1	90	57	57	0	87.69	1	1	CAGAATATGTATGCACAGTTGTTGCCTCTTGCTTTACCAGCACCGCCAATGCCTGGTATGGGAGG	CAGAATATGTATGCCCAGCTGTTGCCTCTTGCTTTACCAGCCCCGCCTATGGCAGGCATGGGTGG	69	4635	KAG6433287.1	Hypothetical protein	Uncharacterized protein
1633	KAG6387963.1	82.09	67	12	0	3	69	1918	1984	1.05e-11	68	KAG6387963.1	74	55	55	0	82.09	1	1	CAGAATATTCCGGATGACCCTCTAGTTCTTGAACACGCGATTTCATACGTGACACGAATGCAACAAG	CAGAACCTTCCAGATGACCCTCTAGTTCTTGGACATGCAATTTCACTCGTGAATCGCATGAAACAAG	69	2094	KAG6387963.1	Hypothetical protein	Uncharacterized protein
1633	KAG6409625.1	82.09	67	12	0	3	69	1918	1984	1.05e-11	68	KAG6409625.1	74	55	55	0	82.09	1	1	CAGAATATTCCGGATGACCCTCTAGTTCTTGAACACGCGATTTCATACGTGACACGAATGCAACAAG	CAGAATCTTCCAGATGATCCTCTAGTTCTTGGACATGCAATTTCACTCGTGAATCGCATGAAACAAG	69	2094	KAG6409625.1	Hypothetical protein	Uncharacterized protein
1643	KAG6410924.1	94.203	69	4	0	1	69	825	893	1.2e-23	107	KAG6410924.1	118	65	65	0	94.2	1	1	TGCAGAATATTTGGCATATGAATGCGGAAAGCATGTCCTCGTCATATTGACAGATATGAGTTCTTATGC	TGCAGAATATTTAGCATATGAATGCGGAAAGCATGTTCTTGTCATATTGACAGATATGAGTTCATATGC	69	1515	KAG6410924.1	V-type H+-transporting ATPase subunit B	K02147
1643	KAG6421567.1	92.754	69	5	0	1	69	1404	1472	5.1e-22	103	KAG6421567.1	113	64	64	0	92.75	1	1	TGCAGAATATTTGGCATATGAATGCGGAAAGCATGTCCTCGTCATATTGACAGATATGAGTTCTTATGC	TGCAGAATATTTAGCATATGAATGCGGAAAGCATGTTCTTGTCATATTGACAGATATGAGCTCCTATGC	69	2094	KAG6421567.1	V-type H+-transporting ATPase subunit B	K02147
1643	KAG6386388.1	89.855	69	7	0	1	69	777	845	2.64e-19	94.2	KAG6386388.1	103	62	62	0	89.86	1	1	TGCAGAATATTTGGCATATGAATGCGGAAAGCATGTCCTCGTCATATTGACAGATATGAGTTCTTATGC	TGCAGAATACTTAGCATATGAATGTGGCAAGCATGTTCTTGTCATATTGACAGATATGAGTTCCTATGC	69	1467	KAG6386388.1	V-type H+-transporting ATPase subunit B	K02147
1644	KAG6406871.1	85.714	56	8	0	1	56	317	372	3.67e-11	66.2	KAG6406871.1	72	48	48	0	85.71	1	1	TGCAGAATATTTGTGAAGAGGAACGCGTCCCATACATCCCTCCCAAACGCGTCTGA	TGCAGAATATTTGTGAAGAAGAGCACGTGCCATATGTTCCTCCCAAACGTGTCTGA	69	372	KAG6406871.1	transcription elongation factor SPT4	K15171
1660	KAG6402997.1	86.765	68	9	0	1	68	626	559	4.77e-16	83.3	KAG6402997.1	91	59	59	0	86.76	1	-1	TGCAGAATCACGACAGTTGCTGCTCCTCCCATAAACCCTAATATCGCTGCATGCGACAGGAAATCCAC	TGCAGAATCACAACCGTCGCCGCTCCGGCCATAAACCCTACTATCGTTGCATGCGACAGAAAATCCAC	69	1851	KAG6402997.1	sulfate transporter 3	K17471
1660	KAG6382581.1	85.294	68	10	0	1	68	626	559	5.82e-15	78.8	KAG6382581.1	86	58	58	0	85.29	1	-1	TGCAGAATCACGACAGTTGCTGCTCCTCCCATAAACCCTAATATCGCTGCATGCGACAGGAAATCCAC	TGCAGAATCACAACCGTCGCCGCTCCGGCCATAAACCCCACTATCGTTGCATGCGACAGAAAATCCAC	69	1854	KAG6382581.1	sulfate transporter 3	K17471
1660	KAG6400816.1	84.127	63	10	0	6	68	621	559	3.01e-12	69.8	KAG6400816.1	76	53	53	0	84.13	1	-1	AATCACGACAGTTGCTGCTCCTCCCATAAACCCTAATATCGCTGCATGCGACAGGAAATCCAC	AATCACAACAGTCGCCGCTCCGGCCATGAACCCTACTATTGTTGCATGCGACAGAAAATCCAC	69	1926	KAG6400816.1	sulfate transporter 3	K17471
1661	KAG6434161.1	86.154	65	9	0	4	68	517	581	2.03e-14	77.9	KAG6434161.1	85	56	56	0	86.15	1	1	AGAATCACTATCTTCTATTTTGCCAAGGAGGGAGAAAGCTGTAAATTCACACCAGTTTATCCGGA	AGAATTACCATCTTCTATTTTGCTAAGGAGGGGGAGAACTGTAAATTCTCTCCAGTTTATCCAGA	69	1248	KAG6434161.1	Hypothetical protein	Uncharacterized protein
1661	KAG6437495.1	86.154	65	9	0	4	68	583	647	2.03e-14	77.9	KAG6437495.1	85	56	56	0	86.15	1	1	AGAATCACTATCTTCTATTTTGCCAAGGAGGGAGAAAGCTGTAAATTCACACCAGTTTATCCGGA	AGAATTACCATCTTCTATTTTGCTAAGGAGGGGGAGAACTGTAAATTCTCTCCAGTTTATCCAGA	69	1242	KAG6437495.1	Hypothetical protein	Uncharacterized protein
1663	KAG6405629.1	91.045	67	6	0	1	67	1009	1075	7.56e-20	95.1	KAG6405629.1	104	61	61	0	91.04	1	1	TGCAGAATCAGAGGCCTCCCCACGATCTCCGAGGAATCCGAAACTCCTAAGATGATTGAGGATTTGA	TGCAGAATCAGAGGCCTTCCAACAATATCCGAGGACTCCGAAACTCCTAAGATGATTGAAGATTTGA	69	2064	KAG6405629.1	Hypothetical protein	Uncharacterized protein
1663	KAG6382718.1	89.552	67	7	0	1	67	697	763	3.22e-18	90.6	KAG6382718.1	99	60	60	0	89.55	1	1	TGCAGAATCAGAGGCCTCCCCACGATCTCCGAGGAATCCGAAACTCCTAAGATGATTGAGGATTTGA	TGCAGAATCAGAGGCCTTCCAACGATATCCGAGGACTCGGAAACTCCCAAGATGATTGAAGATTTGA	69	1008	KAG6382718.1	Hypothetical protein	Uncharacterized protein
1663	KAG6407880.1	89.552	67	7	0	1	67	979	1045	3.22e-18	90.6	KAG6407880.1	99	60	60	0	89.55	1	1	TGCAGAATCAGAGGCCTCCCCACGATCTCCGAGGAATCCGAAACTCCTAAGATGATTGAGGATTTGA	TGCAGAATCAGAGGCCTTCCAACGATATCCGAGGACTCGGAAACTCCCAAGATGATTGAAGATTTGA	69	2034	KAG6407880.1	Hypothetical protein	Uncharacterized protein
1664	KAG6420875.1	91.304	69	6	0	1	69	3045	2977	6.21e-21	98.7	KAG6420875.1	108	63	63	0	91.3	1	-1	TGCAGAATCAGCTATTAGAGTGGCAGGAATATTGTCATGTACCAACTCAAAAGCGGTAAGTCTTGATCC	TGCAGAATCAGCTACTAAGGTAGCAGGAATATTGTCATGTACCAACTCAAAAGCTGTCAGTCTTGATCC	69	3456	KAG6420875.1	Hypothetical protein	Uncharacterized protein
1664	KAG6423899.1	88.235	68	8	0	2	69	716	649	1.12e-17	87.8	KAG6423899.1	96	60	60	0	88.24	1	-1	GCAGAATCAGCTATTAGAGTGGCAGGAATATTGTCATGTACCAACTCAAAAGCGGTAAGTCTTGATCC	GCAGAATCAGCTACTAAGGTAGCAGGAATATTGTCATGTACTAACTCAAAAGCTGTCAGTCTTGACCC	69	1128	KAG6423899.1	methylthioribose-1-phosphate isomerase [EC:5.3.1.23]	K08963
1666	KAG6408538.1	91.176	68	6	0	2	69	806	739	2.17e-20	96.9	KAG6408538.1	106	62	62	0	91.18	1	-1	GCAGAATCAGTAATTACTGTTGTTTGTAGGCCTGTGGCAGCCAGTTCTTTTGCAAAAGCATGCCCCTG	GCAGAATCGGTAATAACCGTAGTTTGTAGGCCACTGGCAGCCAGTTCTTTTGCAAAAGCATGCCCCTG	69	1248	KAG6408538.1	translation initiation factor eIF-2B subunit beta	K03754
1666	KAG6421815.1	88.406	69	8	0	1	69	801	733	3.22e-18	89.7	KAG6421815.1	98	61	61	0	88.41	1	-1	TGCAGAATCAGTAATTACTGTTGTTTGTAGGCCTGTGGCAGCCAGTTCTTTTGCAAAAGCATGCCCCTG	TGCAGAATCGGTAATAACCGTAGTTTGAAGGCCACTGGAAGCCAGTTCTTTTGCAAAAGCATGCCCCTG	69	1242	KAG6421815.1	translation initiation factor eIF-2B subunit beta	K03754
1666	KAG6424843.1	88.406	69	8	0	1	69	801	733	3.22e-18	89.7	KAG6424843.1	98	61	61	0	88.41	1	-1	TGCAGAATCAGTAATTACTGTTGTTTGTAGGCCTGTGGCAGCCAGTTCTTTTGCAAAAGCATGCCCCTG	TGCAGAATCGGTAATAACCGTAGTTTGAAGGCCCCTGGAAGCCAGTTCTTTTGCAAAAGCATGCCCCTG	69	1242	KAG6424843.1	translation initiation factor eIF-2B subunit beta	K03754
1668	KAG6406259.1	98.077	52	1	0	1	52	2445	2496	3.22e-18	90.6	KAG6406259.1	99	51	51	0	98.08	1	1	TGCAGAATCAGTTGCTATTATTACTCCTGAGCTTCAGCAGGCCTTCCTGGAG	TGCAGAATCAGTTGCTATTATTACGCCTGAGCTTCAGCAGGCCTTCCTGGAG	69	3222	KAG6406259.1	structural maintenance of chromosomes protein 5	K22803
1668	KAG6408569.1	98.077	52	1	0	1	52	168	219	3.22e-18	90.6	KAG6408569.1	99	51	51	0	98.08	1	1	TGCAGAATCAGTTGCTATTATTACTCCTGAGCTTCAGCAGGCCTTCCTGGAG	TGCAGAATCAGTTGCTATTATTACGCCTGAGCTTCAGCAGGCCTTCCTGGAG	69	573	KAG6408569.1	Hypothetical protein	Uncharacterized protein
1672	KAG6388159.1	92.647	68	5	0	2	69	848	781	1.78e-21	101	KAG6388159.1	111	63	63	0	92.65	1	-1	GCAGAATCATAAGAAGCAACATGCTGAAAAGCCTTCCAGGCTAGCCTTCTCCGAAATTGCCGGTCATC	GCAGAATCATAAGAAGCAACATGCTGAAAAGCTTTCCAGGCTAGCCTTCTCCGGAATTGCTCATCATC	69	1875	KAG6388159.1	phosphoribosylaminoimidazolecarboxamide formyltransferase / IMP cyclohydrolase [EC:2.1.2.3 3.5.4.10]	K00602
1672	KAG6409418.1	92.647	68	5	0	2	69	797	730	1.78e-21	101	KAG6409418.1	111	63	63	0	92.65	1	-1	GCAGAATCATAAGAAGCAACATGCTGAAAAGCCTTCCAGGCTAGCCTTCTCCGAAATTGCCGGTCATC	GCAGAATCATAAGAAGCAACATGCTGAAAAGCTTTCCAGGCTAGCCTTCTCCGGAATTGCTCATCATC	69	1824	KAG6409418.1	phosphoribosylaminoimidazolecarboxamide formyltransferase / IMP cyclohydrolase [EC:2.1.2.3 3.5.4.10]	K00602
1673	KAG6388159.1	92.647	68	5	0	2	69	848	781	1.78e-21	101	KAG6388159.1	111	63	63	0	92.65	1	-1	GCAGAATCATAAGAAGCAACATGCTGAAAAGCCTTCCAGGCTAGCCTTCTCCGAAATTGCCGGTCATC	GCAGAATCATAAGAAGCAACATGCTGAAAAGCTTTCCAGGCTAGCCTTCTCCGGAATTGCTCATCATC	69	1875	KAG6388159.1	phosphoribosylaminoimidazolecarboxamide formyltransferase / IMP cyclohydrolase [EC:2.1.2.3 3.5.4.10]	K00602
1673	KAG6409418.1	92.647	68	5	0	2	69	797	730	1.78e-21	101	KAG6409418.1	111	63	63	0	92.65	1	-1	GCAGAATCATAAGAAGCAACATGCTGAAAAGCCTTCCAGGCTAGCCTTCTCCGAAATTGCCGGTCATC	GCAGAATCATAAGAAGCAACATGCTGAAAAGCTTTCCAGGCTAGCCTTCTCCGGAATTGCTCATCATC	69	1824	KAG6409418.1	phosphoribosylaminoimidazolecarboxamide formyltransferase / IMP cyclohydrolase [EC:2.1.2.3 3.5.4.10]	K00602
1674	KAG6388159.1	92.647	68	5	0	2	69	848	781	1.78e-21	101	KAG6388159.1	111	63	63	0	92.65	1	-1	GCAGAATCATAAGAAGCAACATGCTGAAAAGCCTTCCAGGCTAGCCTTCTCCGAAATTGCCGGTCATC	GCAGAATCATAAGAAGCAACATGCTGAAAAGCTTTCCAGGCTAGCCTTCTCCGGAATTGCTCATCATC	69	1875	KAG6388159.1	phosphoribosylaminoimidazolecarboxamide formyltransferase / IMP cyclohydrolase [EC:2.1.2.3 3.5.4.10]	K00602
1674	KAG6409418.1	92.647	68	5	0	2	69	797	730	1.78e-21	101	KAG6409418.1	111	63	63	0	92.65	1	-1	GCAGAATCATAAGAAGCAACATGCTGAAAAGCCTTCCAGGCTAGCCTTCTCCGAAATTGCCGGTCATC	GCAGAATCATAAGAAGCAACATGCTGAAAAGCTTTCCAGGCTAGCCTTCTCCGGAATTGCTCATCATC	69	1824	KAG6409418.1	phosphoribosylaminoimidazolecarboxamide formyltransferase / IMP cyclohydrolase [EC:2.1.2.3 3.5.4.10]	K00602
1676	KAG6429479.1	84.058	69	11	0	1	69	462	530	7.08e-14	76.1	KAG6429479.1	83	58	58	0	84.06	1	1	TGCAGAATCATACCAGCAAGCACTTCCTAAGGCCCTGGCTCATCATTTTGAAGCCAAGCTGCTCCTCCT	TGCAGAACCATACCAGCAAACGCTTGCTAAGGCGCTAGCTCATCAGTTCGATGCCAAGTTGCTGCTCCT	69	2433	KAG6429479.1	Hypothetical protein	Uncharacterized protein
1676	KAG6387741.1	84.127	63	10	0	1	63	342	404	3.01e-12	69.8	KAG6387741.1	76	53	53	0	84.13	1	1	TGCAGAATCATACCAGCAAGCACTTCCTAAGGCCCTGGCTCATCATTTTGAAGCCAAGCTGCT	TGCAGAGTCATACCAGCAAGCACTTGCCAGGGCTCTGGCGCAGCATTTTGAGGCAAAGTTGCT	69	2544	KAG6387741.1	Hypothetical protein	Uncharacterized protein
1677	KAG6429479.1	84.058	69	11	0	1	69	462	530	7.08e-14	76.1	KAG6429479.1	83	58	58	0	84.06	1	1	TGCAGAATCATACCAGCAAGCACTTCCTAAGGCCCTGGCTCATCATTTTGAAGCCAAGCTGCTCCTCCT	TGCAGAACCATACCAGCAAACGCTTGCTAAGGCGCTAGCTCATCAGTTCGATGCCAAGTTGCTGCTCCT	69	2433	KAG6429479.1	Hypothetical protein	Uncharacterized protein
1677	KAG6387741.1	84.127	63	10	0	1	63	342	404	3.01e-12	69.8	KAG6387741.1	76	53	53	0	84.13	1	1	TGCAGAATCATACCAGCAAGCACTTCCTAAGGCCCTGGCTCATCATTTTGAAGCCAAGCTGCT	TGCAGAGTCATACCAGCAAGCACTTGCCAGGGCTCTGGCGCAGCATTTTGAGGCAAAGTTGCT	69	2544	KAG6387741.1	Hypothetical protein	Uncharacterized protein
1682	KAG6407792.1	84.058	69	11	0	1	69	3539	3471	7.08e-14	76.1	KAG6407792.1	83	58	58	0	84.06	1	-1	TGCAGAATCATCGAAAGGGCCACTTTGGCTTCAACGGTTGCAAAGTTTAGTCCGAGACAAGTTCTTGGT	TGCAGAATCATTGAAAGTGCTATTTTTGCTTCCACAGTGGCAAAACTTAGTCCAAGACAAGTTCTTGGT	69	3642	KAG6407792.1	Hypothetical protein	Uncharacterized protein
1682	KAG6405566.1	82.609	69	12	0	1	69	3842	3774	8.63e-13	71.6	KAG6405566.1	78	57	57	0	82.61	1	-1	TGCAGAATCATCGAAAGGGCCACTTTGGCTTCAACGGTTGCAAAGTTTAGTCCGAGACAAGTTCTTGGT	TGCAGAATCATTGAAAGTGCTATTTTTGCTTCCACAGTGGCAAAATTCAGACCAAGACAAGTTCTTGGT	69	3945	KAG6405566.1	Hypothetical protein	Uncharacterized protein
1687	KAG6428559.1	97.959	49	1	0	3	51	1752	1800	1.37e-16	85.1	KAG6428559.1	93	48	48	0	97.96	1	1	CAGAATCATTATGCTGGTTGAAGCAGTATGTGCAGGTTTTTTCATGAGT	CAGAATCATTATGCTGGTTGAAGCAGTATGTGCAGGATTTTTCATGAGT	69	2367	KAG6428559.1	cathepsin H [EC:3.4.22.16]	K01366
1687	KAG6431652.1	97.917	48	1	0	3	50	447	494	4.77e-16	83.3	KAG6431652.1	91	47	47	0	97.92	1	1	CAGAATCATTATGCTGGTTGAAGCAGTATGTGCAGGTTTTTTCATGAG	CAGAATCATTATGCTGGTTGAAGCAGTATGTGCAGGATTTTTCATGAG	69	1062	KAG6431652.1	Hypothetical protein	Uncharacterized protein
1695	KAG6419421.1	86.957	69	9	0	1	69	813	745	1.37e-16	85.1	KAG6419421.1	93	60	60	0	86.96	1	-1	TGCAGAATCCATTGTGTTTACTGCAAACCATGCATGCATTGAGGTATACGTCTTCTTATCCGTGACCAC	TGCAGAACCAATTGAGTTTACTGAAAACCATGCATGCATTGAAGTGTATGTCTTCTTATCAGTCACCAC	69	1515	KAG6419421.1	Hypothetical protein	Uncharacterized protein
1695	KAG6407119.1	86.765	68	9	0	2	69	596	529	4.77e-16	83.3	KAG6407119.1	91	59	59	0	86.76	1	-1	GCAGAATCCATTGTGTTTACTGCAAACCATGCATGCATTGAGGTATACGTCTTCTTATCCGTGACCAC	GCAGAATCGACCGTGTTTACTGAAAACCATGCATGCATTGAAGTGTATGTCTTCTTATCAGTCACCAC	69	1434	KAG6407119.1	Hypothetical protein	Uncharacterized protein
1695	KAG6404949.1	86.567	67	9	0	3	69	844	778	1.67e-15	81.5	KAG6404949.1	89	58	58	0	86.57	1	-1	CAGAATCCATTGTGTTTACTGCAAACCATGCATGCATTGAGGTATACGTCTTCTTATCCGTGACCAC	CAGAATCGACCGTGTTTACTGAAAACCATGCATGCATTGAAGTGTATGTCTTCTTATCAGTCACCAC	69	1650	KAG6404949.1	galacturonosyltransferase 12/13/14/15 [EC:2.4.1.-]	K20867
1697	KAG6425956.1	85.294	68	10	0	1	68	537	604	5.82e-15	78.8	KAG6425956.1	86	58	58	0	85.29	1	1	TGCAGAATCCCGCTTAGAATGGGACTCGAAATCTCTTGAAAATAAGCTTTTCAATGAGCCTACATATG	TGCAGAATCTGGCTTAGATTGGGATGCAAAAGCTCTGGAAAATAAGCTTTTCAATGAGTCTCCATATG	69	1395	KAG6425956.1	Hypothetical protein	Uncharacterized protein
1697	KAG6430034.1	82.353	68	12	0	1	68	492	559	3.01e-12	69.8	KAG6430034.1	76	56	56	0	82.35	1	1	TGCAGAATCCCGCTTAGAATGGGACTCGAAATCTCTTGAAAATAAGCTTTTCAATGAGCCTACATATG	TGCAGAATCTGGCTTAGATTGGGATGCAAAAGCTCTCAAAAACAAGCTTTTCAATGAGTCTCCATATG	69	1350	KAG6430034.1	Hypothetical protein	Uncharacterized protein
1698	KAG6425956.1	85.294	68	10	0	1	68	537	604	5.82e-15	78.8	KAG6425956.1	86	58	58	0	85.29	1	1	TGCAGAATCCCGCTTAGAATGGGACTCGAAATCTCTTGAAAATAAGCTTTTCAATGAGCCTGCATATG	TGCAGAATCTGGCTTAGATTGGGATGCAAAAGCTCTGGAAAATAAGCTTTTCAATGAGTCTCCATATG	69	1395	KAG6425956.1	Hypothetical protein	Uncharacterized protein
1698	KAG6430034.1	82.353	68	12	0	1	68	492	559	3.01e-12	69.8	KAG6430034.1	76	56	56	0	82.35	1	1	TGCAGAATCCCGCTTAGAATGGGACTCGAAATCTCTTGAAAATAAGCTTTTCAATGAGCCTGCATATG	TGCAGAATCTGGCTTAGATTGGGATGCAAAAGCTCTCAAAAACAAGCTTTTCAATGAGTCTCCATATG	69	1350	KAG6430034.1	Hypothetical protein	Uncharacterized protein
1703	KAG6427105.1	93.651	63	4	0	1	63	290	352	2.17e-20	96.9	KAG6427105.1	106	59	59	0	93.65	1	1	TGCAGAATCCTCATGCAGTTCAGGAATTGAGGGCTGACAAACAGTACAATCTCCATATGCTTA	TGCAGAATCCAAATGCAGTTCAGGAATTAAGGGCTGACAAACAGTACAATCTCCAGATGCTTA	69	1317	KAG6427105.1	translation initiation factor 3 subunit E	K03250
1703	KAG6430117.1	93.651	63	4	0	1	63	290	352	2.17e-20	96.9	KAG6430117.1	106	59	59	0	93.65	1	1	TGCAGAATCCTCATGCAGTTCAGGAATTGAGGGCTGACAAACAGTACAATCTCCATATGCTTA	TGCAGAATCCAAATGCAGTTCAGGAATTAAGGGCTGACAAACAGTACAATCTCCAGATGCTTA	69	1317	KAG6430117.1	translation initiation factor 3 subunit E	K03250
1703	KAG6411493.1	89.552	67	7	0	1	67	281	347	3.22e-18	90.6	KAG6411493.1	99	60	60	0	89.55	1	1	TGCAGAATCCTCATGCAGTTCAGGAATTGAGGGCTGACAAACAGTACAATCTCCATATGCTTACAGA	TGCAGAATCCTCAAGCAGTGCAGGAATTAAGGGCTGACAAACAGTACAATTTACAGATGCTTAAAGA	69	1080	KAG6411493.1	translation initiation factor 3 subunit E	K03250
1704	KAG6421566.1	85.507	69	10	0	1	69	521	589	1.67e-15	80.6	KAG6421566.1	88	59	59	0	85.51	1	1	TGCAGAATCCTGTCAAAAACCCACCCGTCTCTGTTGAATCGCCATCTACTGGTGAGTTAGGCGTGCAAG	TGCAGAATTCTGTCAAAAGCTCACCCGTCTCTGTGGAAGCACCATCCACTAGCGAGTTAGGAGTGCAAG	69	921	KAG6421566.1	Hypothetical protein	Uncharacterized protein
1704	KAG6413539.1	81.159	69	13	0	1	69	578	646	3.67e-11	67.1	KAG6413539.1	73	56	56	0	81.16	1	1	TGCAGAATCCTGTCAAAAACCCACCCGTCTCTGTTGAATCGCCATCTACTGGTGAGTTAGGCGTGCAAG	TGCAGAATTCGGTCAAAGGCTCTCCCATCTCTGTAGAAGCACCATCTACTAGCGACTTAGGCGTGCAAG	69	978	KAG6413539.1	Hypothetical protein	Uncharacterized protein
1713	KAG6423722.1	91.304	69	6	0	1	69	834	766	6.21e-21	98.7	KAG6423722.1	108	63	63	0	91.3	1	-1	TGCAGAATCGCTCTCCCCAGCAGCAGATATGTGACTCATGAAGATAGCCTTGGTCGACCGAGGTATCAG	TGCAGAATCGCTCTCCCCGGCAGCAGATATGTGAGACATAAAGATAGCTTTGGTTGACCGAGGTATCAG	69	1692	KAG6423722.1	Hypothetical protein	Uncharacterized protein
1713	KAG6420687.1	89.855	69	7	0	1	69	834	766	2.64e-19	94.2	KAG6420687.1	103	62	62	0	89.86	1	-1	TGCAGAATCGCTCTCCCCAGCAGCAGATATGTGACTCATGAAGATAGCCTTGGTCGACCGAGGTATCAG	TGCAGAATCGCTCTCCCCGGCAGCAGATATGTGAGACATAAAGATAGCTTTGGTTGACCGAGGCATCAG	69	1767	KAG6420687.1	Hypothetical protein	Uncharacterized protein
1713	KAG6420710.1	89.855	69	7	0	1	69	834	766	2.64e-19	94.2	KAG6420710.1	103	62	62	0	89.86	1	-1	TGCAGAATCGCTCTCCCCAGCAGCAGATATGTGACTCATGAAGATAGCCTTGGTCGACCGAGGTATCAG	TGCAGAATCGCTCTCCCCGGCAGCAGATATGTGAGACATAAAGATAGCTTTGGTTGACCGAGGCATCAG	69	2772	KAG6420710.1	Hypothetical protein	Uncharacterized protein
1714	KAG6423722.1	91.304	69	6	0	1	69	834	766	6.21e-21	98.7	KAG6423722.1	108	63	63	0	91.3	1	-1	TGCAGAATCGCTCTCCCCAGCAGCAGATATGTGACTCATGAAGATAGCCTTGGTCGACCGAGGTATCAG	TGCAGAATCGCTCTCCCCGGCAGCAGATATGTGAGACATAAAGATAGCTTTGGTTGACCGAGGTATCAG	69	1692	KAG6423722.1	Hypothetical protein	Uncharacterized protein
1714	KAG6420687.1	89.855	69	7	0	1	69	834	766	2.64e-19	94.2	KAG6420687.1	103	62	62	0	89.86	1	-1	TGCAGAATCGCTCTCCCCAGCAGCAGATATGTGACTCATGAAGATAGCCTTGGTCGACCGAGGTATCAG	TGCAGAATCGCTCTCCCCGGCAGCAGATATGTGAGACATAAAGATAGCTTTGGTTGACCGAGGCATCAG	69	1767	KAG6420687.1	Hypothetical protein	Uncharacterized protein
1714	KAG6420710.1	89.855	69	7	0	1	69	834	766	2.64e-19	94.2	KAG6420710.1	103	62	62	0	89.86	1	-1	TGCAGAATCGCTCTCCCCAGCAGCAGATATGTGACTCATGAAGATAGCCTTGGTCGACCGAGGTATCAG	TGCAGAATCGCTCTCCCCGGCAGCAGATATGTGAGACATAAAGATAGCTTTGGTTGACCGAGGCATCAG	69	2772	KAG6420710.1	Hypothetical protein	Uncharacterized protein
1723	KAG6413695.1	82.609	69	12	0	1	69	124	192	8.63e-13	71.6	KAG6413695.1	78	57	57	0	82.61	1	1	TGCAGAATCGTAGCCGCTGCTCGTAGAGCCAACCGCCTTGACTCCCTTTGTCATCAAATCAACGAAATG	TGCAGAGTCGTGGCCGCAGCCCGTAGAACCGACCGCCTCAAGTCCCTTTGCGATCAAATCAACGCAATG	69	846	KAG6413695.1	Hypothetical protein	Uncharacterized protein
1728	KAG6409470.1	83.099	71	8	2	1	69	2013	2081	3.01e-12	69.8	KAG6409470.1	76	59	59	4	83.1	1	1	TGCAGAATCTAATACCAAAATGGAGATGCA--GAACATTTCTAAAATTGTTGAAGTTTCTCGCTGCCAATC	TGAAGAAACTACGAACAATATGGAG--GCAACGAACGTTTCTAAAATCGTTGAAGTTTCTCGCTGCCAATC	69	3117	KAG6409470.1	Hypothetical protein	Uncharacterized protein
1736	KAG6393554.1	89.091	55	6	0	1	55	1191	1245	2.47e-13	73.4	KAG6393554.1	80	49	49	0	89.09	1	1	TGCAGAATCTCCACAAGGCATTCTTCGTACACCTGACACTGTTACCAAATTCCAG	TGCAGAATCTCCGCAAGGCATCCTTCGGACACCTGATACTGTTGCCAAATTTCAG	69	5172	KAG6393554.1	clathrin heavy chain	K04646
1736	KAG6395393.1	89.091	55	6	0	1	55	1191	1245	2.47e-13	73.4	KAG6395393.1	80	49	49	0	89.09	1	1	TGCAGAATCTCCACAAGGCATTCTTCGTACACCTGACACTGTTACCAAATTCCAG	TGCAGAATCTCCGCAAGGCATCCTTCGGACACCTGATACTGTTGCCAAATTTCAG	69	5124	KAG6395393.1	clathrin heavy chain	K04646
1736	KAG6433287.1	89.091	55	6	0	1	55	705	759	2.47e-13	73.4	KAG6433287.1	80	49	49	0	89.09	1	1	TGCAGAATCTCCACAAGGCATTCTTCGTACACCTGACACTGTTACCAAATTCCAG	TGCAGAATCTCCACAAGGCATCCTTAGGACACCTGATACTGTTGCCAAATTTCAG	69	4635	KAG6433287.1	Hypothetical protein	Uncharacterized protein
1737	KAG6388348.1	92.727	55	4	0	1	55	1659	1713	4.77e-16	82.4	KAG6388348.1	90	51	51	0	92.73	1	1	TGCAGAATCTCCCCAAGGCATCCTCCGGACATCAGATACTGTTGCCAAATTTCAG	TGCCGAATCTCCCCAAGGCATCCTCCGGACACCAGAAACTGTTTCCAAATTTCAG	69	5589	KAG6388348.1	clathrin heavy chain	K04646
1737	KAG6393554.1	92.727	55	4	0	1	55	1191	1245	4.77e-16	82.4	KAG6393554.1	90	51	51	0	92.73	1	1	TGCAGAATCTCCCCAAGGCATCCTCCGGACATCAGATACTGTTGCCAAATTTCAG	TGCAGAATCTCCGCAAGGCATCCTTCGGACACCTGATACTGTTGCCAAATTTCAG	69	5172	KAG6393554.1	clathrin heavy chain	K04646
1737	KAG6395393.1	92.727	55	4	0	1	55	1191	1245	4.77e-16	82.4	KAG6395393.1	90	51	51	0	92.73	1	1	TGCAGAATCTCCCCAAGGCATCCTCCGGACATCAGATACTGTTGCCAAATTTCAG	TGCAGAATCTCCGCAAGGCATCCTTCGGACACCTGATACTGTTGCCAAATTTCAG	69	5124	KAG6395393.1	clathrin heavy chain	K04646
1739	KAG6390087.1	84.058	69	11	0	1	69	689	621	7.08e-14	76.1	KAG6390087.1	83	58	58	0	84.06	1	-1	TGCAGAATCTCTTTCCCAGGACTCTCAGCCGGGGTCTTACGCTTCAGCCACGGCTCAATTGACTTATAC	TGCAGATTCTCCTTCCCCGGATTCTCCGGCGGACTCTTCCTCTTCAGCCACGGCTCAATCGACTTATAC	69	996	KAG6390087.1	succinate dehydrogenase (ubiquinone) iron-sulfur subunit [EC:1.3.5.1]	K00235
1739	KAG6391851.1	84.058	69	11	0	1	69	518	450	7.08e-14	76.1	KAG6391851.1	83	58	58	0	84.06	1	-1	TGCAGAATCTCTTTCCCAGGACTCTCAGCCGGGGTCTTACGCTTCAGCCACGGCTCAATTGACTTATAC	TGCAGATTCTCCTTCCCCGGATTCTCCGGCGGACTCTTCCGCTTCAACCACGGCTCAATCGACTTATAC	69	825	KAG6391851.1	succinate dehydrogenase (ubiquinone) iron-sulfur subunit [EC:1.3.5.1]	K00235
1739	KAG6410191.1	82.609	69	12	0	1	69	518	450	8.63e-13	71.6	KAG6410191.1	78	57	57	0	82.61	1	-1	TGCAGAATCTCTTTCCCAGGACTCTCAGCCGGGGTCTTACGCTTCAGCCACGGCTCAATTGACTTATAC	TGCAGATTCTCCTTCCCCGGGTTCTCCGGCGGGCTCTTCCTCTTCAGCCACGGCTCAATCGACTTGTAC	69	825	KAG6410191.1	succinate dehydrogenase (ubiquinone) iron-sulfur subunit [EC:1.3.5.1]	K00235
1740	KAG6401365.1	83.871	62	10	0	1	62	662	723	1.05e-11	68	KAG6401365.1	74	52	52	0	83.87	1	1	TGCAGAATCTGAAAGAGCTAACCCTGGTTGGATGTCCCGGTATTGATGATGAGAGTCTCAAG	TGAAGAATCTAAAAGAGTTGGCCCTCGTTGGATGTCCAGGTATCGATGATGACAGCCTCAAG	69	1884	KAG6401365.1	F-box and leucine-rich repeat protein 2/20	K10268
1747	KAG6417302.1	88.333	60	7	0	3	62	145	204	2.03e-14	77.9	KAG6417302.1	85	53	53	0	88.33	1	1	CAGAATCTGATGGGGATTGAAGAGTGTGGAAATGAAGAAGATGAGTGCTTGAGCAGAAGG	CATAATCTGATGGGGATGGAGGAGTGTGGAAGTGAAGATGAAGAGTGCTTAAGCAGAAGG	69	258	KAG6417302.1	Hypothetical protein	Uncharacterized protein
1747	KAG6414780.1	86.667	60	8	0	3	62	148	207	2.47e-13	73.4	KAG6414780.1	80	52	52	0	86.67	1	1	CAGAATCTGATGGGGATTGAAGAGTGTGGAAATGAAGAAGATGAGTGCTTGAGCAGAAGG	CATAATCTGATGGGGATGGAGGAGTGTGGGAATGAAGATGAAGAGTGCTTAAACAGAAGG	69	261	KAG6414780.1	Hypothetical protein	Uncharacterized protein
1748	KAG6425548.1	91.071	56	5	0	1	56	1221	1276	5.82e-15	79.7	KAG6425548.1	87	51	51	0	91.07	1	1	TGCAGAATCTGCACTTCGTGCGTTGAATCGGAGTGATATTGCTGGGAAGAAGATTA	TGCAGAATCTGCACTTCGCGCGTTGAACCGGAGTGACATTGCTGGAAAGCAGATTA	69	2901	KAG6425548.1	Hypothetical protein	Uncharacterized protein
1748	KAG6426688.1	89.286	56	6	0	1	56	1200	1255	7.08e-14	75.2	KAG6426688.1	82	50	50	0	89.29	1	1	TGCAGAATCTGCACTTCGTGCGTTGAATCGGAGTGATATTGCTGGGAAGAAGATTA	TGCAGAATCTGCACTTCGTGCATTGAACCGGAGTGACATTGCCGGAAAGCAGATTA	69	2958	KAG6426688.1	Hypothetical protein	Uncharacterized protein
1748	KAG6429315.1	87.5	56	7	0	1	56	1404	1459	3.01e-12	70.7	KAG6429315.1	77	49	49	0	87.5	1	1	TGCAGAATCTGCACTTCGTGCGTTGAATCGGAGTGATATTGCTGGGAAGAAGATTA	TGCAGAATCTGCACTTCGTGCATTGAACCGGAGTGACATTTCCGGAAAGCAGATTA	69	3123	KAG6429315.1	Hypothetical protein	Uncharacterized protein
1749	KAG6395506.1	85.938	64	9	0	1	64	2430	2493	7.08e-14	76.1	KAG6395506.1	83	55	55	0	85.94	1	1	TGCAGAATCTGCATTCCGTTCACTCCATGAAGGTTCGCCATTAGAAGCCTTCTGGGACAGTTTA	TGCGGAATCTGCATTCCGAGCACTTCGCGAAGGCTCATCATTAGAAGCCTTCTGGGACAGTTTA	69	3015	KAG6395506.1	electron-transferring-flavoprotein dehydrogenase [EC:1.5.5.1]	K00311
1749	KAG6393673.1	82.812	64	11	0	1	64	2298	2361	3.67e-11	67.1	KAG6393673.1	73	53	53	0	82.81	1	1	TGCAGAATCTGCATTCCGTTCACTCCATGAAGGTTCGCCATTAGAAGCCTTCTGGGACAGTTTA	TGCGGAATCTGCATTCCGAGCTGTTCGCGAAGGCTCATCATTAGAAGCCTTCTGGGACAGTTTA	69	2889	KAG6393673.1	electron-transferring-flavoprotein dehydrogenase [EC:1.5.5.1]	K00311
1750	KAG6393484.1	91.667	60	5	0	3	62	1969	2028	3.92e-17	86.9	KAG6393484.1	95	55	55	0	91.67	1	1	CAGAATCTGCCTCCTCAAAGTGATTTATCAGCTTGGAAAGCTATTCATGACTATAAGGTT	CAGAATTTGCCTCCTCAAAGCGATTTATCAGCTTGGACAGCTATTCAGGACTATAAGTTT	69	2190	KAG6393484.1	Hypothetical protein	Uncharacterized protein
1750	KAG6384066.1	90	60	6	0	3	62	1960	2019	4.77e-16	82.4	KAG6384066.1	90	54	54	0	90	1	1	CAGAATCTGCCTCCTCAAAGTGATTTATCAGCTTGGAAAGCTATTCATGACTATAAGGTT	CAGAATTTGCCGCCTCAGAGTGATTTATCAGCTTGGACAGCTATTCAGGACTATAAGTTT	69	2913	KAG6384066.1	valyl-tRNA synthetase [EC:6.1.1.9]	K01873
1750	KAG6395310.1	90	60	6	0	3	62	2062	2121	4.77e-16	82.4	KAG6395310.1	90	54	54	0	90	1	1	CAGAATCTGCCTCCTCAAAGTGATTTATCAGCTTGGAAAGCTATTCATGACTATAAGGTT	CAGAATTTGCCGCCTCAGAGTGATTTATCAGCTTGGACAGCTATTCAGGACTATAAGTTT	69	3012	KAG6395310.1	valyl-tRNA synthetase [EC:6.1.1.9]	K01873
1751	KAG6437276.1	92.308	65	5	0	1	65	468	532	7.56e-20	96	KAG6437276.1	105	60	60	0	92.31	1	1	TGCAGAATCTGCTACTAAAACTCCCGTACAAGACAAAAAGGCCAAAGTGACCCCTCAGAAAACTG	TGCAGAATCTGCTACTAAAACCCCTGTCCAAGATAAAAAGGCCAAAGTGACCCCCCAGAAAACTG	69	723	KAG6437276.1	Hypothetical protein	Uncharacterized protein
1755	KAG6402017.1	82.812	64	11	0	1	64	183	120	3.67e-11	67.1	KAG6402017.1	73	53	53	0	82.81	1	-1	TGCAGAATCTGTTTCTTGTGAGGGTAGGTTAGTATGCTTAGTCTCCAATTTCCGAATTTTAGCT	TGCAGAATCTGTTTCTTGTGAGGGTAATTCAGAATGGTTAGTCTCCGGATTTCGACGTTTAGCT	69	2904	KAG6402017.1	Hypothetical protein	Uncharacterized protein
1758	KAG6411555.1	85.507	69	10	0	1	69	1123	1191	1.67e-15	80.6	KAG6411555.1	88	59	59	0	85.51	1	1	TGCAGAATCTTGAAGAAACTTGTGTTGAGCAACTTAGCAAAATCAAAGTGGGTGGAGCAACACACAGCT	TGCAGAATTTTGAAGAAACTTGTCTTATGCGATTTAGCTAAATCAAAGTGGGTTGAACAACATACAGCT	69	1620	KAG6411555.1	Hypothetical protein	Uncharacterized protein
1758	KAG6414212.1	85.507	69	10	0	1	69	1123	1191	1.67e-15	80.6	KAG6414212.1	88	59	59	0	85.51	1	1	TGCAGAATCTTGAAGAAACTTGTGTTGAGCAACTTAGCAAAATCAAAGTGGGTGGAGCAACACACAGCT	TGCAGAATTTTGAAGAAACTTGTCTTAAGCGATTTATCTAAATCAAAGTGGGTTGAACAACATACAGCT	69	1623	KAG6414212.1	Hypothetical protein	Uncharacterized protein
1758	KAG6427771.1	85.507	69	10	0	1	69	1123	1191	1.67e-15	80.6	KAG6427771.1	88	59	59	0	85.51	1	1	TGCAGAATCTTGAAGAAACTTGTGTTGAGCAACTTAGCAAAATCAAAGTGGGTGGAGCAACACACAGCT	TGCAGAATTTTGAAGAAGCTTGTCTTAGGCGATTTAGCTAAATCAAAGTGGGTTGAACAACACACAGCT	69	1575	KAG6427771.1	Hypothetical protein	Uncharacterized protein
1767	KAG6411884.1	87.692	65	8	0	1	65	2847	2783	4.77e-16	82.4	KAG6411884.1	90	57	57	0	87.69	1	-1	TGCAGAATGAAATGGTAATTGCTTACTGAAGTACCTAACTGAATCAACTTCCAAGCTATTTGAAA	TGCTGAGTGAAATGGTAATTGCTTATTGAAGTCCCTGCCTGACTCAACTTCCAAGCTATTTGGAA	69	5682	KAG6411884.1	Hypothetical protein	Uncharacterized protein
1767	KAG6386484.1	86.567	67	9	0	1	67	2841	2775	1.67e-15	81.5	KAG6386484.1	89	58	58	0	86.57	1	-1	TGCAGAATGAAATGGTAATTGCTTACTGAAGTACCTAACTGAATCAACTTCCAAGCTATTTGAAACA	TGCTGAGTAAAATGGTAATTGCTTATTGAAGTCCCTGCCTGACTCAACTTCCAAGCTATTTGGAACA	69	5685	KAG6386484.1	Hypothetical protein	Uncharacterized protein
1767	KAG6401288.1	83.582	67	11	0	1	67	2814	2748	8.63e-13	72.5	KAG6401288.1	79	56	56	0	83.58	1	-1	TGCAGAATGAAATGGTAATTGCTTACTGAAGTACCTAACTGAATCAACTTCCAAGCTATTTGAAACA	TGCCGAGTGAAATGGTAATTGCTTATTGAAGTCCCCACTGGACTCAACTTCCAAGCTACTTGGAACA	69	5829	KAG6401288.1	Hypothetical protein	Uncharacterized protein
1793	KAG6416822.1	95.349	43	2	0	6	48	253	295	3.01e-12	69.8	KAG6416822.1	76	41	41	0	95.35	1	1	AATGAGTTGTTGTTTGCTGAGATAGAGCTCATGCAGAAAAGGG	AATGAGTTGTTGTTTGCTGAGATAGAGCTCATGCAAAAGAGGG	69	591	KAG6416822.1	MADS-box transcription factor, plant	K09264
1794	KAG6416822.1	95.349	43	2	0	6	48	253	295	3.01e-12	69.8	KAG6416822.1	76	41	41	0	95.35	1	1	AATGAGTTGTTGTTTGCTGAGATTGAGCTCATGCAGAAGAGGG	AATGAGTTGTTGTTTGCTGAGATAGAGCTCATGCAAAAGAGGG	69	591	KAG6416822.1	MADS-box transcription factor, plant	K09264
1794	KAG6420729.1	93.333	45	3	0	4	48	296	340	1.05e-11	68.9	KAG6420729.1	75	42	42	0	93.33	1	1	AGAATGAGTTGTTGTTTGCTGAGATTGAGCTCATGCAGAAGAGGG	AGAATGAGATGCTGTTTGCTGAAATTGAGCTCATGCAGAAGAGGG	69	558	KAG6420729.1	MADS-box transcription factor, plant	K09264
1796	KAG6397291.1	88.406	69	8	0	1	69	155	87	3.22e-18	89.7	KAG6397291.1	98	61	61	0	88.41	1	-1	TGCAGAATGATATACGAATCTCCGGAGTAGAATTTACCATAATCTGGCTTTGGCAAGGGAACTGGTTGG	TGTAGAATGATATAAGAATCTCCGGAGTAGAATTTTCCATAGTCCGGTTTCGGCAAGGGAACAGGTTGG	69	2787	KAG6397291.1	Hypothetical protein	Uncharacterized protein
1796	KAG6399547.1	88.406	69	8	0	1	69	155	87	3.22e-18	89.7	KAG6399547.1	98	61	61	0	88.41	1	-1	TGCAGAATGATATACGAATCTCCGGAGTAGAATTTACCATAATCTGGCTTTGGCAAGGGAACTGGTTGG	TGTAGAATGATATAAGAATCTCCGCAGTAGAATTTCCCATAGTCAAGTTTTGGCAAGGGAACTGGTTGG	69	2763	KAG6399547.1	Hypothetical protein	Uncharacterized protein
1796	KAG6411047.1	86.957	69	9	0	1	69	155	87	1.37e-16	85.1	KAG6411047.1	93	60	60	0	86.96	1	-1	TGCAGAATGATATACGAATCTCCGGAGTAGAATTTACCATAATCTGGCTTTGGCAAGGGAACTGGTTGG	TGTAGAACAATATATGAATCTCCAGTGTGGAATTTACCATAATCAGGTTTTGGCAAGGGAACTGGTTGG	69	2796	KAG6411047.1	Hypothetical protein	Uncharacterized protein
1797	KAG6397291.1	88.406	69	8	0	1	69	155	87	3.22e-18	89.7	KAG6397291.1	98	61	61	0	88.41	1	-1	TGCAGAATGATATACGAATCTCCGGAGTAGAATTTACCATAATCTGGCTTTGGCAAGGGAACTGGTTGG	TGTAGAATGATATAAGAATCTCCGGAGTAGAATTTTCCATAGTCCGGTTTCGGCAAGGGAACAGGTTGG	69	2787	KAG6397291.1	Hypothetical protein	Uncharacterized protein
1797	KAG6399547.1	88.406	69	8	0	1	69	155	87	3.22e-18	89.7	KAG6399547.1	98	61	61	0	88.41	1	-1	TGCAGAATGATATACGAATCTCCGGAGTAGAATTTACCATAATCTGGCTTTGGCAAGGGAACTGGTTGG	TGTAGAATGATATAAGAATCTCCGCAGTAGAATTTCCCATAGTCAAGTTTTGGCAAGGGAACTGGTTGG	69	2763	KAG6399547.1	Hypothetical protein	Uncharacterized protein
1797	KAG6411047.1	86.957	69	9	0	1	69	155	87	1.37e-16	85.1	KAG6411047.1	93	60	60	0	86.96	1	-1	TGCAGAATGATATACGAATCTCCGGAGTAGAATTTACCATAATCTGGCTTTGGCAAGGGAACTGGTTGG	TGTAGAACAATATATGAATCTCCAGTGTGGAATTTACCATAATCAGGTTTTGGCAAGGGAACTGGTTGG	69	2796	KAG6411047.1	Hypothetical protein	Uncharacterized protein
1808	KAG6398000.1	89.706	68	7	0	1	68	293	226	9.22e-19	92.4	KAG6398000.1	101	61	61	0	89.71	1	-1	TGCAGAATGATTTTACTCACTTCTGCATCACTTGACACAATTGTTGGACTCCCAAATAAATGTGACTT	TGCAGAATTATTTTGCTCACTTCTGCATCACTCGACACTATAGTAGGACTCCCAAATAAATGTGATTT	69	1272	KAG6398000.1	3-epi-6-deoxocathasterone 23-monooxygenase [EC:1.14.14.147]	K12638
1809	KAG6398000.1	89.706	68	7	0	1	68	293	226	9.22e-19	92.4	KAG6398000.1	101	61	61	0	89.71	1	-1	TGCAGAATGATTTTACTCACTTCTGCATCACTTGACACAATTGTTGGACTCCCAAATAAATGTGACTT	TGCAGAATTATTTTGCTCACTTCTGCATCACTCGACACTATAGTAGGACTCCCAAATAAATGTGATTT	69	1272	KAG6398000.1	3-epi-6-deoxocathasterone 23-monooxygenase [EC:1.14.14.147]	K12638
1810	KAG6422010.1	85.075	67	10	0	1	67	1341	1275	2.03e-14	77	KAG6422010.1	84	57	57	0	85.07	1	-1	TGCAGAATGCAAATTCCCCTCTTCCAACCACTTGAGGTGGTTCTCTTTGAACTCCATATGTTGGAGC	TGCTGAATGCAAGTTGCCATCTTCTAACCACTTGAGGTGGTTTTCCTTGAACTCCAAATGTCTGAGC	69	1413	KAG6422010.1	tRNA (guanine10-N2)-methyltransferase [EC:2.1.1.214]	K15430
1810	KAG6425076.1	83.582	67	11	0	1	67	1386	1320	8.63e-13	72.5	KAG6425076.1	79	56	56	0	83.58	1	-1	TGCAGAATGCAAATTCCCCTCTTCCAACCACTTGAGGTGGTTCTCTTTGAACTCCATATGTTGGAGC	TGCTGAATGTAAGTTGCCATCTTCTAACCACTTGAGGTGGTTTTCCTTGAACTCCAGATGTCTGAGC	69	1458	KAG6425076.1	tRNA (guanine10-N2)-methyltransferase [EC:2.1.1.214]	K15430
1822	KAG6412076.1	82.857	70	10	2	1	69	503	435	3.67e-11	66.2	KAG6412076.1	72	58	58	2	82.86	1	-1	TGCAGAATGCCAAACCACCGGATTTCCTTCATATCTACTCCGTAGGATAAGT-CATCTGGTGCATGAGAA	TGGAGAATGCCACACCACCGGATTTTCTTCATGTCGACTCCATAAG-TAAGTTCGTACGGTGCATGAGAA	69	1290	KAG6412076.1	heparan-alpha-glucosaminide N-acetyltransferase [EC:2.3.1.78]	K10532
1828	KAG6408687.1	94.118	68	4	0	1	68	1343	1276	4.18e-23	105	KAG6408687.1	116	64	64	0	94.12	1	-1	TGCAGAATGCGAGCCCTGGCTTCCTCAGTAGGATGAGGAAACTCTATTTTACGATCCAATCGACCAGA	TGCAAAATGCGAGCCCTTGCTTCCTCAGTAGGGTGAGGAAATTCTATTTTACGATCCAATCGACCAGA	69	1563	KAG6408687.1	Hypothetical protein	Uncharacterized protein
1828	KAG6408653.1	94.118	68	4	0	1	68	1157	1090	4.18e-23	105	KAG6408653.1	116	64	64	0	94.12	1	-1	TGCAGAATGCGAGCCCTGGCTTCCTCAGTAGGATGAGGAAACTCTATTTTACGATCCAATCGACCAGA	TGCAAAATGCGAGCCCTTGCTTCCTCAGTAGGGTGAGGAAATTCTATTTTACGATCCAATCGACCAGA	69	1377	KAG6408653.1	26S proteasome regulatory subunit T5	K03065
1828	KAG6422163.1	89.706	68	7	0	1	68	1001	934	9.22e-19	92.4	KAG6422163.1	101	61	61	0	89.71	1	-1	TGCAGAATGCGAGCCCTGGCTTCCTCAGTAGGATGAGGAAACTCTATTTTACGATCCAATCGACCAGA	TGCAAAATGCGAGCCCTTGCTTCTTCAGTAGGGTGAGGGAATTCTATTTTACGATCTAATCGACCAGA	69	1221	KAG6422163.1	26S proteasome regulatory subunit T5	K03065
1831	KAG6396948.1	92	50	4	0	1	50	842	891	2.47e-13	73.4	KAG6396948.1	80	46	46	0	92	1	1	TGCAGAATGCTGAAGTGAAACTTGATGACGTGACCCTTTGTTTGTCAAAG	TGCAGAATGCTGATGTGAAACTTGACGATGTGACCCTTTGCTTGTCAAAG	69	2724	KAG6396948.1	Hypothetical protein	Uncharacterized protein
1831	KAG6399225.1	92	50	4	0	1	50	842	891	2.47e-13	73.4	KAG6399225.1	80	46	46	0	92	1	1	TGCAGAATGCTGAAGTGAAACTTGATGACGTGACCCTTTGTTTGTCAAAG	TGCAGAATGCTGATGTGAAACTTGACGATGTGACCCTTTGCTTGTCAAAG	69	13074	KAG6399225.1	vacuolar protein sorting-associated protein 13A/C	K19525
1832	KAG6432263.1	92.537	67	5	0	3	69	301	235	6.21e-21	99.6	KAG6432263.1	109	62	62	0	92.54	1	-1	CAGAATGCTGCAACTCACTCAAGTCCCTCATGAGCAGTGGGAAGGACTGCCTCTGCCTAATCGCCAC	CAGAGTGCTGCAACTCCCTCAAGTCCCTCATGAGCAGTGGCAAGGACTGCCTCTGCCTAATAGTCAC	69	519	KAG6432263.1	Hypothetical protein	Uncharacterized protein
1832	KAG6432264.1	92.537	67	5	0	3	69	71	137	6.21e-21	99.6	KAG6432264.1	109	62	62	0	92.54	1	1	CAGAATGCTGCAACTCACTCAAGTCCCTCATGAGCAGTGGGAAGGACTGCCTCTGCCTAATCGCCAC	CAGAGTGCTGCAACTCCCTCAAGTCCCTCATGAGCAGTGGCAAGGACTGCCTCTGCCTAATAGTCAC	69	498	KAG6432264.1	Hypothetical protein	Uncharacterized protein
1832	KAG6435570.1	92.537	67	5	0	3	69	625	559	6.21e-21	99.6	KAG6435570.1	109	62	62	0	92.54	1	-1	CAGAATGCTGCAACTCACTCAAGTCCCTCATGAGCAGTGGGAAGGACTGCCTCTGCCTAATCGCCAC	CAGAGTGCTGCAACTCACTCAAGTCCCTCATGAGCAGTGGCAAGGACTGCCTCTGCCTTATAGTCAC	69	840	KAG6435570.1	Hypothetical protein	Uncharacterized protein
1836	KAG6430502.1	82.353	68	12	0	1	68	1301	1368	3.01e-12	69.8	KAG6430502.1	76	56	56	0	82.35	1	1	TGCAGAATGCTTTGGAAAGTGATGGATCCTCAGAGGCCAGTTTTGATCGATTCATGAAGGATTTGAAA	TGCATGATGCATTGGAAAATGATGGATCATCTGAGGCTAATTTTGAGCAATTTGTGAAGGATTTGAAA	69	1395	KAG6430502.1	Hypothetical protein	Uncharacterized protein
1837	KAG6385396.1	85	60	9	0	7	66	1	60	1.05e-11	68.9	KAG6385396.1	75	51	51	0	85	1	1	ATGGATGCAGTAGTGGGGAAGGTTATTGGCATGCCATGGTGCCGTGGTCAATTTTCGCAG	ATGGATGCATCAGTAGTGAAGGTTATGGGCATGACATGGTATCGTGGTCAATTTTCTCAG	69	3231	KAG6385396.1	Hypothetical protein	Uncharacterized protein
1841	KAG6401010.1	89.706	68	7	0	2	69	1780	1847	9.22e-19	92.4	KAG6401010.1	101	61	61	0	89.71	1	1	GCAGAATGGCCAAAGAGGCTTCATGTTTTTCCTGAATGGATGAACAACAGAGAAAAGCTAGCTGCTGA	GCGGAATGGCCAAAGAGGCTTCATACATTTCCTGAATGGATGAACAACAGAGAGAAGTTAACTGCTGA	69	2460	KAG6401010.1	tRNA wybutosine-synthesizing protein 1 [EC:4.1.3.44]	K15449
1859	KAG6425256.1	90	50	5	0	11	60	1155	1106	1.05e-11	68.9	KAG6425256.1	75	45	45	0	90	1	-1	ACCTAGGATGGTCACCCCAAGCTTCGCGTTGTGGTTTCCCGTGGCCTAGA	ACCTAGAATGGTGACCCCAAGCTTCGCGTTGTGGTCTCCCGAGGCCTGGA	69	1254	KAG6425256.1	mannose-1-phosphate guanylyltransferase [EC:2.7.7.13]	K00966
1862	KAG6390101.1	85.294	68	10	0	1	68	1589	1522	5.82e-15	78.8	KAG6390101.1	86	58	58	0	85.29	1	-1	TGCAGAATGTATCTCCCGTTGTTCATCAAGAAGATCGAGCTGAGTGCGTGGTCTTTGTACAGCTTCGA	TGCAAGACGTATCTCCCGTTGTTCATCAAGAAGATCGCCCCGAGGGCGTGGTCCTTGTAGAGCTTTGA	69	2022	KAG6390101.1	exocyst complex component 7	K07195
1862	KAG6391874.1	85.294	68	10	0	1	68	1598	1531	5.82e-15	78.8	KAG6391874.1	86	58	58	0	85.29	1	-1	TGCAGAATGTATCTCCCGTTGTTCATCAAGAAGATCGAGCTGAGTGCGTGGTCTTTGTACAGCTTCGA	TGCAAGACGTATCTCCCGTTGTTCATCAAGAAGATCGCACCGAGGGCGTGGTCCTTGTAGAGCTTTGA	69	2031	KAG6391874.1	exocyst complex component 7	K07195
1862	KAG6410152.1	85.294	68	10	0	1	68	1583	1516	5.82e-15	78.8	KAG6410152.1	86	58	58	0	85.29	1	-1	TGCAGAATGTATCTCCCGTTGTTCATCAAGAAGATCGAGCTGAGTGCGTGGTCTTTGTACAGCTTCGA	TGCAACACGTATCTCCCGTTGTTCATCAGGAAGATCGCTCCCAGAGCGTGGTCCTTGTACAGCTTCGA	69	2016	KAG6410152.1	exocyst complex component 7	K07195
1866	KAG6403435.1	90.476	63	6	0	7	69	1	63	1.12e-17	87.8	KAG6403435.1	96	57	57	0	90.48	1	1	ATGTCTGGCGGAATTGCGCGCGGACGGCTGACGGAGGAGCGGAAATCATGGCGCAAAAATCAT	ATGTCTGGTGGAATTGCGCGCGGGCGGCTGACGGAGGAGCGAAAGTCATGGCGGAAGAATCAT	69	549	KAG6403435.1	ubiquitin-conjugating enzyme E2 I	K10577
1866	KAG6401242.1	88.889	63	7	0	7	69	1	63	4.77e-16	83.3	KAG6401242.1	91	56	56	0	88.89	1	1	ATGTCTGGCGGAATTGCGCGCGGACGGCTGACGGAGGAGCGGAAATCATGGCGCAAAAATCAT	ATGTCCGGTGGAATTGCGCGCGGGCGGCTGACGGAGGAGCGAAAGTCATGGCGGAAGAATCAT	69	561	KAG6401242.1	ubiquitin-conjugating enzyme E2 I	K10577
1868	KAG6435653.1	84.848	66	10	0	2	67	234	169	7.08e-14	75.2	KAG6435653.1	82	56	56	0	84.85	1	-1	GCAGAATGTGTCATCTATTGAAATAGTGGCTCTACATGCTGAGTTTTTGCACGTCCATGAAGTAGA	GCAAAATGTGTCATCTATTGAAAGTGTGGCTCGACATGCAGAATTTTTGCAGGTCCACGAGTTAGA	69	2736	KAG6435653.1	Hypothetical protein	Uncharacterized protein
1868	KAG6432339.1	83.333	66	11	0	2	67	234	169	3.01e-12	70.7	KAG6432339.1	77	55	55	0	83.33	1	-1	GCAGAATGTGTCATCTATTGAAATAGTGGCTCTACATGCTGAGTTTTTGCACGTCCATGAAGTAGA	GCAAAATGTGTCATCTATTGAAAGTGTAGCTCGACATGCAGAATTTTTGCAGGTCCACGAGTTAGA	69	1884	KAG6432339.1	Hypothetical protein	Uncharacterized protein
1871	KAG6423635.1	91.304	46	4	0	7	52	432	477	3.67e-11	66.2	KAG6423635.1	72	42	42	0	91.3	1	1	ATGTTGCTGGGCGTTTTCAGCAGTTGCAGCAACGGAAGGCGTCAAC	ATGTTGTTGGGCGTTTTCAGCAGTTGCAGCCACGGAAGGTATCAAC	69	1020	KAG6423635.1	KDEL-tailed cysteine endopeptidase [EC:3.4.22.-]	K16292
1871	KAG6432933.1	91.304	46	4	0	7	52	369	414	3.67e-11	66.2	KAG6432933.1	72	42	42	0	91.3	1	1	ATGTTGCTGGGCGTTTTCAGCAGTTGCAGCAACGGAAGGCGTCAAC	ATGTTGCTGGGCATTTTCAGCAGTTGCAGCCACGGAAGGAATCAAC	69	957	KAG6432933.1	Hypothetical protein	Uncharacterized protein
1872	KAG6423635.1	91.304	46	4	0	7	52	432	477	3.67e-11	66.2	KAG6423635.1	72	42	42	0	91.3	1	1	ATGTTGCTGGGCGTTTTCAGCAGTTGCAGCAACGGAAGGCGTCAAC	ATGTTGTTGGGCGTTTTCAGCAGTTGCAGCCACGGAAGGTATCAAC	69	1020	KAG6423635.1	KDEL-tailed cysteine endopeptidase [EC:3.4.22.-]	K16292
1872	KAG6432933.1	91.304	46	4	0	7	52	369	414	3.67e-11	66.2	KAG6432933.1	72	42	42	0	91.3	1	1	ATGTTGCTGGGCGTTTTCAGCAGTTGCAGCAACGGAAGGCGTCAAC	ATGTTGCTGGGCATTTTCAGCAGTTGCAGCCACGGAAGGAATCAAC	69	957	KAG6432933.1	Hypothetical protein	Uncharacterized protein
1873	KAG6432539.1	84.848	66	10	0	4	69	368	433	7.08e-14	75.2	KAG6432539.1	82	56	56	0	84.85	1	1	AGAATGTTGGCACTAGTGGTCATGATTTTGATGGTGAACAAATTTCAAGTGCTCCCCCTGTCTCAT	AGAATTTTTGCACTAGAGATGATGATTTTGAGGGAGAACAGATTTCAAGTGCTCTCCCTGCCTCAT	69	1725	KAG6432539.1	Hypothetical protein	Uncharacterized protein
1873	KAG6427427.1	82.609	69	12	0	1	69	188	256	8.63e-13	71.6	KAG6427427.1	78	57	57	0	82.61	1	1	TGCAGAATGTTGGCACTAGTGGTCATGATTTTGATGGTGAACAAATTTCAAGTGCTCCCCCTGTCTCAT	TGGAGAATTTTTGCACTGGAGATGATGATTTTGAGGGAGAACAGATTTCAAGTGCTCTCCCTGCCTCAT	69	585	KAG6427427.1	Hypothetical protein	Uncharacterized protein
1873	KAG6388582.1	83.333	66	11	0	4	69	302	367	3.01e-12	70.7	KAG6388582.1	77	55	55	0	83.33	1	1	AGAATGTTGGCACTAGTGGTCATGATTTTGATGGTGAACAAATTTCAAGTGCTCCCCCTGTCTCAT	AGCATGCTTGCACTAGAGATGATGATTTTGAAGGGGAACAAATTTCAAGTGCTCTTCCTGCCTCAT	69	1650	KAG6388582.1	Hypothetical protein	Uncharacterized protein
1876	KAG6423916.1	91.935	62	5	0	1	62	3785	3846	3.22e-18	90.6	KAG6423916.1	99	57	57	0	91.94	1	1	TGCAGAATGTTGTGAACTATCTCCGGCGGTCAAAGGAAATAGCTGAAACAGAGATCTCATTA	TGCAAAGTGTTGTGAACTATCTCCGACGGTCGAAGGAAATAGCTGAAACAGAAATCTCATTA	69	6384	KAG6423916.1	nucleoprotein TPR	K09291
1909	KAG6383043.1	82.609	69	12	0	1	69	289	357	8.63e-13	71.6	KAG6383043.1	78	57	57	0	82.61	1	1	TGCAGAATTCATGGCTATGGGATTTATTACAACAACGCCTTCTTCCACCCTAAAATGCGGTCGTTCTGG	TGCAGGATCAACGGCTACGGGATTTTTTACAACAACGCTTTTCTCCACCCGAAGATGCGGTCGTACTGG	69	1026	KAG6383043.1	Hypothetical protein	Uncharacterized protein
1909	KAG6394270.1	82.609	69	12	0	1	69	289	357	8.63e-13	71.6	KAG6394270.1	78	57	57	0	82.61	1	1	TGCAGAATTCATGGCTATGGGATTTATTACAACAACGCCTTCTTCCACCCTAAAATGCGGTCGTTCTGG	TGCAGGATCAACGGCTACGGGATTTTTTACAACAACGCTTTTCTCCACCCGAAGATGCGGTCGTACTGG	69	1092	KAG6394270.1	Hypothetical protein	Uncharacterized protein
1911	KAG6433582.1	93.333	45	3	0	25	69	366	322	1.05e-11	68.9	KAG6433582.1	75	42	42	0	93.33	1	-1	ACTGATCAAGTCGTCGGAAAAGCTGCTGGAGTTTGTCCAAGAAGA	ACTGATCAAGTCGTCGGAGAAGTTGCTGGAGTTTGTCCAAGAGGA	69	1824	KAG6433582.1	Hypothetical protein	Uncharacterized protein
1932	KAG6436912.1	90.909	55	5	0	1	55	475	421	2.03e-14	77.9	KAG6436912.1	85	50	50	0	90.91	1	-1	TGCAGAATTGAAGGCCTTTGATATATGGTAGAGTGCACGTCCCTGGCAGAAGATA	TGCAGTATTGAATGCCTTCGATATATGGTACAGTGCACGTCCCTGGCAGAAAATA	69	540	KAG6436912.1	Hypothetical protein	Uncharacterized protein
1936	KAG6392649.1	92.754	69	5	0	1	69	1294	1362	5.1e-22	103	KAG6392649.1	113	64	64	0	92.75	1	1	TGCAGAATTGATGGGCCTGCTGCATATGACGTTCTTATAAATTTTGCCCAACGTTGGCGGAAATCAACC	TGCAAAATTGATGGACCTGCTGCATATGATGTTCTTATAAATTTCGCCCAACGTTGGCGCAAATCAACC	69	2574	KAG6392649.1	phospholipase D1/2 [EC:3.1.4.4]	K01115
1936	KAG6394407.1	92.754	69	5	0	1	69	1297	1365	5.1e-22	103	KAG6394407.1	113	64	64	0	92.75	1	1	TGCAGAATTGATGGGCCTGCTGCATATGACGTTCTTATAAATTTTGCCCAACGTTGGCGGAAATCAACC	TGCAAAATTGATGGACCTGCTGCATATGATGTTCTTATAAATTTCGCCCAACGTTGGCGCAAATCAACC	69	2580	KAG6394407.1	phospholipase D1/2 [EC:3.1.4.4]	K01115
1936	KAG6397617.1	92.754	69	5	0	1	69	37	105	5.1e-22	103	KAG6397617.1	113	64	64	0	92.75	1	1	TGCAGAATTGATGGGCCTGCTGCATATGACGTTCTTATAAATTTTGCCCAACGTTGGCGGAAATCAACC	TGCAGAATTGAAGGACCTGCTGCATACGATGTGCTTATAAATTTTGCCCAACGTTGGCGGAAATCAACC	69	954	KAG6397617.1	Hypothetical protein	Uncharacterized protein
1950	KAG6393951.1	81.159	69	13	0	1	69	1647	1579	3.67e-11	67.1	KAG6393951.1	73	56	56	0	81.16	1	-1	TGCAGAATTGGAATTCCAATTACCCGATGTGTCTCTATCATTCTGCTGTCCTCTATATTCTGGTTCATC	TGCAGTGTTGGAATTCCAATTAGCAGATGGCTCTCTATCACTCAGAAGTCCTCTGTTTTCAGGTTCATC	69	2499	KAG6393951.1	Hypothetical protein	Uncharacterized protein
1952	KAG6427924.1	81.944	72	10	1	1	69	672	743	3.01e-12	70.7	KAG6427924.1	77	59	59	3	81.94	1	1	TGCAGAATTGGCAACGGAATCTGCAAAAACGTCTGGTGTT---GAAGAAGAGGAAGAAGGATTACCATCTCC	TGCAGAAATGGCAGTAGAATCTGTGAAAACATCAGCTGTTGAAGAAGAAGAGGAAGAAGGGTTACCATCTCC	69	1446	KAG6427924.1	Hypothetical protein	Uncharacterized protein
1957	KAG6413695.1	81.159	69	13	0	1	69	124	192	3.67e-11	67.1	KAG6413695.1	73	56	56	0	81.16	1	1	TGCAGAATTGTAGCTGCTGCTCGTAGAGCCGACCGCCTTGACTCCCTTTGTCATCAAATCAACGAAATG	TGCAGAGTCGTGGCCGCAGCCCGTAGAACCGACCGCCTCAAGTCCCTTTGCGATCAAATCAACGCAATG	69	846	KAG6413695.1	Hypothetical protein	Uncharacterized protein
1960	KAG6430910.1	91.667	48	4	0	5	52	540	587	3.01e-12	69.8	KAG6430910.1	76	44	44	0	91.67	1	1	GAATTGTGATATTTACAAGGGAAAATGGGTGAAAGATGAAGGGTATCC	GAATTGTGATATGTACAGTGGGAAATGGGTGAAAGATGAAGGGTATCC	69	1572	KAG6430910.1	Hypothetical protein	Uncharacterized protein
1964	KAG6393449.1	95.918	49	2	0	5	53	618	666	1.67e-15	80.6	KAG6393449.1	88	47	47	0	95.92	1	1	GAATTTACGACAGACATTGGATGATCTGACCCGTAATGGTTTCTCTGTT	GAATTTACGACAGACTTTGGATGATCTGACCCGTAATGGTTTTTCTGTT	69	2337	KAG6393449.1	Hypothetical protein	Uncharacterized protein
1964	KAG6395271.1	95.918	49	2	0	5	53	708	756	1.67e-15	80.6	KAG6395271.1	88	47	47	0	95.92	1	1	GAATTTACGACAGACATTGGATGATCTGACCCGTAATGGTTTCTCTGTT	GAATTTACGACAGACTTTGGATGATCTGACCCGTAATGGTTTTTCTGTT	69	3327	KAG6395271.1	Hypothetical protein	Uncharacterized protein
1969	KAG6410934.1	88.71	62	7	0	7	68	1625	1564	1.67e-15	81.5	KAG6410934.1	89	55	55	0	88.71	1	-1	ATTTCCATTATTTCGGAGAAGTCGGGCCTTGATGCTGGATCTTGCTGCCAGCATTTCTCAAG	ATCTCCATTACTTCAGAGAAGTCAGGTCTCGCTGCTGGATCTTGCTGCCAGCATTTCTCAAG	69	1725	KAG6410934.1	Hypothetical protein	Uncharacterized protein
1969	KAG6413548.1	88.71	62	7	0	7	68	1760	1699	1.67e-15	81.5	KAG6413548.1	89	55	55	0	88.71	1	-1	ATTTCCATTATTTCGGAGAAGTCGGGCCTTGATGCTGGATCTTGCTGCCAGCATTTCTCAAG	ATCTCCATTACTTCAGAGAAGTCAGGTCTCGCTGCTGGATCTTGCTGCCAGCATTTCTCAAG	69	1860	KAG6413548.1	Hypothetical protein	Uncharacterized protein
1969	KAG6424609.1	85.484	62	9	0	7	68	1874	1813	8.63e-13	72.5	KAG6424609.1	79	53	53	0	85.48	1	-1	ATTTCCATTATTTCGGAGAAGTCGGGCCTTGATGCTGGATCTTGCTGCCAGCATTTCTCAAG	ATCTCCATTACTTCAGAAAAGTCAGGTCTCGATGCTGGATCTTGCAGCCAGCATCTCTCAAG	69	1974	KAG6424609.1	Hypothetical protein	Uncharacterized protein
1994	KAG6386418.1	90.769	65	6	0	5	69	861	925	9.22e-19	91.5	KAG6386418.1	100	59	59	0	90.77	1	1	GAATTTTGTTGATTTAGCAGGAAGCGAGCGGGCATCTCAAGCTCACTCAGTTGGACAGAGACTCA	GAATTTTGTTGATCTAGCAGGAAGCGAGCGGGCATCTCAAGCACAATCAGTAGGGCAAAGACTCA	69	2799	KAG6386418.1	centromeric protein E	K11498
1994	KAG6411951.1	90.769	65	6	0	5	69	678	742	9.22e-19	91.5	KAG6411951.1	100	59	59	0	90.77	1	1	GAATTTTGTTGATTTAGCAGGAAGCGAGCGGGCATCTCAAGCTCACTCAGTTGGACAGAGACTCA	GAATTTTGTTGATCTAGCAGGAAGCGAGCGGGCATCTCAAGCACAATCAGTAGGGCAAAGACTCA	69	2715	KAG6411951.1	centromeric protein E	K11498
1994	KAG6410842.1	88.889	63	7	0	5	67	744	806	4.77e-16	83.3	KAG6410842.1	91	56	56	0	88.89	1	1	GAATTTTGTTGATTTAGCAGGAAGCGAGCGGGCATCTCAAGCTCACTCAGTTGGACAGAGACT	GAACTTTGTAGATCTGGCAGGAAGTGAGCGGGCATCTCAAGCTAACTCAGTTGGACAGAGGCT	69	2727	KAG6410842.1	centromeric protein E	K11498
2003	KAG6427162.1	88.06	67	8	0	3	69	2508	2574	3.92e-17	86	KAG6427162.1	94	59	59	0	88.06	1	1	CAGACAAAACTCAAGCAAAAACCAGGGTGCTGTAGCTAAACATGCTCCGTCCCTTCTGGAAAAGAGC	CAGGCAATATTCAAGCAAAAATCAGGGTGCTGTAGCTAATCACGCTCCCTCTCTTCTGGAAAAGAGC	69	3459	KAG6427162.1	RAB6A-GEF complex partner protein 1	K20476
2003	KAG6430175.1	88.06	67	8	0	3	69	2463	2529	3.92e-17	86	KAG6430175.1	94	59	59	0	88.06	1	1	CAGACAAAACTCAAGCAAAAACCAGGGTGCTGTAGCTAAACATGCTCCGTCCCTTCTGGAAAAGAGC	CAGGCAATATTCAAGCAAAAATCAGGGTGCTGTAGCTAATCACGCTCCCTCTCTTCTGGAAAAGAGC	69	3693	KAG6430175.1	Hypothetical protein	Uncharacterized protein
2003	KAG6434314.1	88.06	67	8	0	3	69	2472	2538	3.92e-17	86	KAG6434314.1	94	59	59	0	88.06	1	1	CAGACAAAACTCAAGCAAAAACCAGGGTGCTGTAGCTAAACATGCTCCGTCCCTTCTGGAAAAGAGC	CAGACAGTATTCAAGCAAAAACCAGGGTGCTGTAGCTAACCACACTCCCTCTCTTCTGGAAAAGAGC	69	3468	KAG6434314.1	RAB6A-GEF complex partner protein 1	K20476
2008	KAG6424779.1	89.552	67	7	0	1	67	1119	1053	3.22e-18	90.6	KAG6424779.1	99	60	60	0	89.55	1	-1	TGCAGACAAAATGTGCCATTTAGGGCCAGTTGTTTTTCTTCCTGATGCTGTGGGATCAGGTGTTTTC	TGCAGACAAGATGTGCCATTTAGGACCAGTAGTTTTTCTCCCTGAGGCTGAGGGATCTGGTGTTTTC	69	1569	KAG6424779.1	Hypothetical protein	Uncharacterized protein
2008	KAG6421744.1	88.06	67	8	0	1	67	1107	1041	3.92e-17	86	KAG6421744.1	94	59	59	0	88.06	1	-1	TGCAGACAAAATGTGCCATTTAGGGCCAGTTGTTTTTCTTCCTGATGCTGTGGGATCAGGTGTTTTC	TGCCGACAAGATGTGCCATTTAGGACCTGTTGTTTTTCTCCCTGAGGCTGAGGGATCTGGTGTTTTC	69	1557	KAG6421744.1	Hypothetical protein	Uncharacterized protein
2008	KAG6421771.1	88.06	67	8	0	1	67	1107	1041	3.92e-17	86	KAG6421771.1	94	59	59	0	88.06	1	-1	TGCAGACAAAATGTGCCATTTAGGGCCAGTTGTTTTTCTTCCTGATGCTGTGGGATCAGGTGTTTTC	TGCAGACAAGATGTGCCATTTAGGACCTGTTGTTTTTCTCCCTGAGGCTGAGGGGTCTGGTGTTTTC	69	1557	KAG6421771.1	Hypothetical protein	Uncharacterized protein
2020	KAG6411154.1	91.429	70	4	1	2	69	583	652	2.17e-20	97.8	KAG6411154.1	107	64	64	2	91.43	1	1	GCAGACA--AAGCTGAAAAGTGCGGTTCAGTTGCAAGATCTTTTGGATGCAACACGAATTCTAGTACCTC	GCAGACACTAAGCTGAAAAGTGCAGTTCAGTTGCAAGATCTTCTGGATGCTACAAGAATTCTAGTACCTC	69	2613	KAG6411154.1	inositol-hexakisphosphate/diphosphoinositol-pentakisphosphate 1-kinase [EC:2.7.4.24]	K13024
2020	KAG6413767.1	92.424	66	5	0	4	69	1457	1522	2.17e-20	97.8	KAG6413767.1	107	61	61	0	92.42	1	1	AGACAAAGCTGAAAAGTGCGGTTCAGTTGCAAGATCTTTTGGATGCAACACGAATTCTAGTACCTC	AGACGAAGCTGAAAAGTGCAGTTCAGTTGCAAGATCTTCTGGATGCTACAAGAATTCTAGTACCTC	69	3801	KAG6413767.1	inositol-hexakisphosphate/diphosphoinositol-pentakisphosphate 1-kinase [EC:2.7.4.24]	K13024
2020	KAG6398287.1	89.394	66	7	0	4	69	1475	1540	1.12e-17	88.7	KAG6398287.1	97	59	59	0	89.39	1	1	AGACAAAGCTGAAAAGTGCGGTTCAGTTGCAAGATCTTTTGGATGCAACACGAATTCTAGTACCTC	AGACAAAGCTCAAAAGTGCTGTTGAACTGCAAGATCTTTTGGATGCGACACGAATTCTAGTTCCTC	69	3429	KAG6398287.1	inositol-hexakisphosphate/diphosphoinositol-pentakisphosphate 1-kinase [EC:2.7.4.24]	K13024
2039	KAG6401966.1	88.136	59	7	0	1	59	2426	2368	7.08e-14	76.1	KAG6401966.1	83	52	52	0	88.14	1	-1	TGCAGACAACACTGAGAGACAATGCCGAGATTGGTTTCACATATACGCTTCAGATCACC	TGCAGACAACATTGAGAGACAATACCCAGATCTGTCTCACATATACGCTTTAGATCACC	69	3450	KAG6401966.1	eukaryotic translation initiation factor 2C	K11593
2039	KAG6404278.1	86.441	59	8	0	1	59	2360	2302	8.63e-13	71.6	KAG6404278.1	78	51	51	0	86.44	1	-1	TGCAGACAACACTGAGAGACAATGCCGAGATTGGTTTCACATATACGCTTCAGATCACC	TGTAGACAACATTGAGAGACAATACCCAGATCTGTCTCACATATACGCTTTAGATCACC	69	3384	KAG6404278.1	eukaryotic translation initiation factor 2C	K11593
2049	KAG6406353.1	83.077	65	8	1	7	68	2222	2286	3.67e-11	67.1	KAG6406353.1	73	54	54	3	83.08	1	1	CAACTGCTGATGATCTGCAAAGTTTCTTTGCTGA---TGGTGGAGTCATTGCCATTCGAATATTA	CAACTGTTGATGATCTGCATAATTTCTTTGCTGATGCTGGTGGAGTTGTTGCCGTTCGATTACTA	69	2709	KAG6406353.1	squamous cell carcinoma antigen recognized by T-cells 3	K22611
2049	KAG6408654.1	83.077	65	8	1	7	68	2024	2088	3.67e-11	67.1	KAG6408654.1	73	54	54	3	83.08	1	1	CAACTGCTGATGATCTGCAAAGTTTCTTTGCTGA---TGGTGGAGTCATTGCCATTCGAATATTA	CAACTGCTGATGATCTGCATAATTTCTTTGCTGATGCTGGTGGAGTTGTTGCAGTTCGATTACTA	69	2511	KAG6408654.1	Hypothetical protein	Uncharacterized protein
2050	KAG6406353.1	83.077	65	8	1	7	68	2222	2286	3.67e-11	67.1	KAG6406353.1	73	54	54	3	83.08	1	1	CAACTGCTGATGATCTGCAAAGTTTCTTTGCTGA---TGGTGGAGTCATTGCCATTCGAATATTA	CAACTGTTGATGATCTGCATAATTTCTTTGCTGATGCTGGTGGAGTTGTTGCCGTTCGATTACTA	69	2709	KAG6406353.1	squamous cell carcinoma antigen recognized by T-cells 3	K22611
2050	KAG6408654.1	83.077	65	8	1	7	68	2024	2088	3.67e-11	67.1	KAG6408654.1	73	54	54	3	83.08	1	1	CAACTGCTGATGATCTGCAAAGTTTCTTTGCTGA---TGGTGGAGTCATTGCCATTCGAATATTA	CAACTGCTGATGATCTGCATAATTTCTTTGCTGATGCTGGTGGAGTTGTTGCAGTTCGATTACTA	69	2511	KAG6408654.1	Hypothetical protein	Uncharacterized protein
2054	KAG6432949.1	87.5	56	7	0	2	57	997	1052	3.01e-12	70.7	KAG6432949.1	77	49	49	0	87.5	1	1	GCAGACAAGATGATTGGTGCTGCTGCTGATTCAGTTCATGATCTCATAATCCTTCC	GCAGACAAGGCGATTGGCGCTGCTGCAGATTCTGTTCATGATCTGATAATCCTGCC	69	1422	KAG6432949.1	Hypothetical protein	Uncharacterized protein
2055	KAG6432949.1	87.5	56	7	0	2	57	997	1052	3.01e-12	70.7	KAG6432949.1	77	49	49	0	87.5	1	1	GCAGACAAGATGATTGGTGCTGCTGCTGATTCAGTTCATGATCTCATAATCCTTCC	GCAGACAAGGCGATTGGCGCTGCTGCAGATTCTGTTCATGATCTGATAATCCTGCC	69	1422	KAG6432949.1	Hypothetical protein	Uncharacterized protein
2065	KAG6436963.1	87.879	66	8	0	4	69	212	277	1.37e-16	84.2	KAG6436963.1	92	58	58	0	87.88	1	1	AGACAAGTATGAGATCCTGGAGAAATCGTGGTAGTGAGTTCAATCCATACTTCCTTCTTGGGGATC	AGACAAGTATGATATCTTGGAGAAATCGTGGTGCTGAGTTCGATCCATACTTCATGCTCGGGGATC	69	1242	KAG6436963.1	Hypothetical protein	Uncharacterized protein
2065	KAG6433638.1	85.938	64	9	0	6	69	310	373	7.08e-14	76.1	KAG6433638.1	83	55	55	0	85.94	1	1	ACAAGTATGAGATCCTGGAGAAATCGTGGTAGTGAGTTCAATCCATACTTCCTTCTTGGGGATC	ACAAGTATGATATCTTGGAGAAATCGTGGTGCTGAGTTCGATCCATACTTCATGCTCAGGGATC	69	1188	KAG6433638.1	Hypothetical protein	Uncharacterized protein
2065	KAG6428331.1	84.615	65	10	0	5	69	195	259	2.47e-13	73.4	KAG6428331.1	80	55	55	0	84.62	1	1	GACAAGTATGAGATCCTGGAGAAATCGTGGTAGTGAGTTCAATCCATACTTCCTTCTTGGGGATC	GACAAGTATGAAATCTTGGAAAAATCGTGGTACTCAGTTCCATCCATATTTCATTCTCGGTGATC	69	1074	KAG6428331.1	Hypothetical protein	Uncharacterized protein
2067	KAG6386628.1	86.441	59	7	1	6	63	797	855	1.05e-11	68	KAG6386628.1	74	51	51	1	86.44	1	1	ACAAGTTTACTGTTCCATCATTTCTTGAGGCTCTAGAAGACTCTGTTGCT-CGAAAAAC	ACAACTTCACTGTTCCATCTTTTCTCGAGGCCCTTGAAGACTCTGTTGCTAAGAAAAAC	69	927	KAG6386628.1	26S proteasome regulatory subunit N13	K06691
2073	KAG6417466.1	97.917	48	1	0	1	48	170	217	4.77e-16	83.3	KAG6417466.1	91	47	47	0	97.92	1	1	TGCAGACAATGCTTCCGCAGCAATGCAAAGGAAATTGGCTTCATCAAG	TGCAGACAGTGCTTCCGCAGCAATGCAAAGGAAATTGGCTTCATCAAG	69	267	KAG6417466.1	Hypothetical protein	Uncharacterized protein
2073	KAG6417468.1	97.917	48	1	0	1	48	266	313	4.77e-16	83.3	KAG6417468.1	91	47	47	0	97.92	1	1	TGCAGACAATGCTTCCGCAGCAATGCAAAGGAAATTGGCTTCATCAAG	TGCAGACAGTGCTTCCGCAGCAATGCAAAGGAAATTGGCTTCATCAAG	69	363	KAG6417468.1	Hypothetical protein	Uncharacterized protein
2073	KAG6428553.1	90	50	5	0	1	50	115	164	1.05e-11	68.9	KAG6428553.1	75	45	45	0	90	1	1	TGCAGACAATGCTTCCGCAGCAATGCAAAGGAAATTGGCTTCATCAAGGT	TGCAGGCAGTGCTTCCGCAGCAACGCCAAGGAGATTGGCTTCATCAAGGT	69	258	KAG6428553.1	small subunit ribosomal protein S29e	K02980
2075	KAG6390924.1	91.489	47	4	0	3	49	1109	1155	1.05e-11	68	KAG6390924.1	74	43	43	0	91.49	1	1	CAGACAATGGGTGGCCTGTATCAGATTGTACAGCAGAAGGCCTCAAG	CAGACAATGGGTGGCCAGTCTCAAATTGTACAGCAGAAGGGCTCAAG	69	1689	KAG6390924.1	Hypothetical protein	Uncharacterized protein
2075	KAG6430222.1	91.489	47	4	0	3	49	965	1011	1.05e-11	68	KAG6430222.1	74	43	43	0	91.49	1	1	CAGACAATGGGTGGCCTGTATCAGATTGTACAGCAGAAGGCCTCAAG	CAGACAATGGGTGGCCAGTCTCAAATTGTACAGCAGAAGGGCTCAAG	69	1530	KAG6430222.1	Hypothetical protein	Uncharacterized protein
2077	KAG6414618.1	89.706	68	7	0	1	68	2813	2746	9.22e-19	92.4	KAG6414618.1	101	61	61	0	89.71	1	-1	TGCAGACAATGTTTCAAGGTCTGCAAAGTAACGGGCTTCGACACAAACGAATCCATCCCATTTGCATA	TGCAGACATTGTTTCAAGCTTTGCAAAGTAATAGGCTTCGACACAAACGAGTCCATGCCATTTGCATA	69	2829	KAG6414618.1	Hypothetical protein	Uncharacterized protein
2077	KAG6417159.1	89.706	68	7	0	1	68	2810	2743	9.22e-19	92.4	KAG6417159.1	101	61	61	0	89.71	1	-1	TGCAGACAATGTTTCAAGGTCTGCAAAGTAACGGGCTTCGACACAAACGAATCCATCCCATTTGCATA	TGCAGACATTGTTTCAAGCTTTGCAAAGTAATAGGCTTCGACACAAACGAGTCCATGCCATTTGCATA	69	2826	KAG6417159.1	Hypothetical protein	Uncharacterized protein
2077	KAG6433200.1	86.765	68	9	0	1	68	2537	2470	4.77e-16	83.3	KAG6433200.1	91	59	59	0	86.76	1	-1	TGCAGACAATGTTTCAAGGTCTGCAAAGTAACGGGCTTCGACACAAACGAATCCATCCCATTTGCATA	TGCACACATTGTCTCAAGGTTTGCAAAGTAATAGGCTTCGACACAAATGAGTCCATACCATTTGCATA	69	2553	KAG6433200.1	Hypothetical protein	Uncharacterized protein
2078	KAG6414618.1	89.706	68	7	0	1	68	2813	2746	9.22e-19	92.4	KAG6414618.1	101	61	61	0	89.71	1	-1	TGCAGACAATGTTTCAAGGTCTGCAAAGTAACGGGCTTCGACACAAACGAATCCATCCCATTTGCATA	TGCAGACATTGTTTCAAGCTTTGCAAAGTAATAGGCTTCGACACAAACGAGTCCATGCCATTTGCATA	69	2829	KAG6414618.1	Hypothetical protein	Uncharacterized protein
2078	KAG6417159.1	89.706	68	7	0	1	68	2810	2743	9.22e-19	92.4	KAG6417159.1	101	61	61	0	89.71	1	-1	TGCAGACAATGTTTCAAGGTCTGCAAAGTAACGGGCTTCGACACAAACGAATCCATCCCATTTGCATA	TGCAGACATTGTTTCAAGCTTTGCAAAGTAATAGGCTTCGACACAAACGAGTCCATGCCATTTGCATA	69	2826	KAG6417159.1	Hypothetical protein	Uncharacterized protein
2078	KAG6433200.1	86.765	68	9	0	1	68	2537	2470	4.77e-16	83.3	KAG6433200.1	91	59	59	0	86.76	1	-1	TGCAGACAATGTTTCAAGGTCTGCAAAGTAACGGGCTTCGACACAAACGAATCCATCCCATTTGCATA	TGCACACATTGTCTCAAGGTTTGCAAAGTAATAGGCTTCGACACAAATGAGTCCATACCATTTGCATA	69	2553	KAG6433200.1	Hypothetical protein	Uncharacterized protein
2084	KAG6423759.1	94.118	68	4	0	2	69	1245	1312	4.18e-23	105	KAG6423759.1	116	64	64	0	94.12	1	1	GCAGACACAAGATCAAACATGCAAGAAATTTACTCCATTTGGTGGAGGGTCGAGATGCTGCCCAGGTT	GCAGAAACAAGATCAAACGTGCAAGAAATTTACTCCATTTGGTGGAGGGTCAAGATGTTGCCCAGGTT	69	1458	KAG6423759.1	cytochrome P450 family 724 subfamily B1 [EC:1.14.13.-]	K12639
2084	KAG6420741.1	92.647	68	5	0	2	69	1308	1375	1.78e-21	101	KAG6420741.1	111	63	63	0	92.65	1	1	GCAGACACAAGATCAAACATGCAAGAAATTTACTCCATTTGGTGGAGGGTCGAGATGCTGCCCAGGTT	GCAGAAACAAGATCAAACATGTAAGAAATTCACTCCATTTGGTGGAGGGTCGAGGTGTTGCCCAGGTT	69	1521	KAG6420741.1	cytochrome P450 family 724 subfamily B1 [EC:1.14.13.-]	K12639
2085	KAG6438424.1	91.304	69	3	1	1	69	456	391	2.17e-20	96.9	KAG6438424.1	106	63	63	3	91.3	1	-1	TGCAGACACAAGCCTCTCAGACAGACTACTACTTTCTTTGGGAGTTAGCTTCTCATTTGCCTCCATCAA	TGCAGACACAAGCCTCTCAGACAGACTACT---TTCTTTAGGAATCAGCTTCTCATTTGCCTCCATCAA	69	1206	KAG6438424.1	Hypothetical protein	Uncharacterized protein
2085	KAG6435095.1	88.406	69	5	1	1	69	456	391	1.12e-17	87.8	KAG6435095.1	96	61	61	3	88.41	1	-1	TGCAGACACAAGCCTCTCAGACAGACTACTACTTTCTTTGGGAGTTAGCTTCTCATTTGCCTCCATCAA	TGCAGACACAAGCCTCTCAGGCAGACTACT---TTCTTTAGGTATGAGCTTCTCATTTGCCTCCATCAA	69	1218	KAG6435095.1	Hypothetical protein	Uncharacterized protein
2086	KAG6388391.1	85.075	67	10	0	3	69	588	654	2.03e-14	77	KAG6388391.1	84	57	57	0	85.07	1	1	CAGACACAAGTATCATGCGAAATCGTCGTAAACACACGCAATCAGTCGATTACTCACCAAAACTGCT	CAGACAAAAGTATCATGTGAAATCATCGTTAACACAAGCAATCATACAGTTACTCACCAAAATTGCT	69	666	KAG6388391.1	Hypothetical protein	Uncharacterized protein
2087	KAG6388391.1	85.075	67	10	0	3	69	588	654	2.03e-14	77	KAG6388391.1	84	57	57	0	85.07	1	1	CAGACACAAGTATCATGCGAAATCGTCGTAAACACACGCAATCAGTCGATTACTCACCAAAACTGCT	CAGACAAAAGTATCATGTGAAATCATCGTTAACACAAGCAATCATACAGTTACTCACCAAAATTGCT	69	666	KAG6388391.1	Hypothetical protein	Uncharacterized protein
2096	KAG6415541.1	85.484	62	8	1	7	68	230	290	1.05e-11	68.9	KAG6415541.1	75	53	53	1	85.48	1	1	CACATACTGATCTGAACGAAGAAAAAGAAAATGTTGGTGAGGATGTGGATGGTAAGAATTGG	CACATACTGATCTGAATGAAGAAAAAGAAACTGTGGGAGAAGATATGGATGAT-ACAATTGG	69	822	KAG6415541.1	translation initiation factor 2 subunit 2	K03238
2099	KAG6415938.1	95.238	42	2	0	2	43	4475	4434	1.05e-11	68	KAG6415938.1	74	40	40	0	95.24	1	-1	GCAGACACATTATTGCTTTGAACAGCCACCATGTATGGTTTA	GCAGACACATTATTGCTTTGAACAGCTACCATGTATGGCTTA	69	5235	KAG6415938.1	clathrin heavy chain	K04646
2100	KAG6382701.1	84.127	63	10	0	7	69	78	140	3.01e-12	69.8	KAG6382701.1	76	53	53	0	84.13	1	1	CACCAAGAAAGCTGTATTCGTTCTTGGCGATTCCACGGCTGATGTCGGAACTAATAACTATAT	CACCAAGAAACTCGTGTTTGTTCTTGGCGACTCAACGGCCGATGTTGGAACTAATAACTACAT	69	897	KAG6382701.1	Hypothetical protein	Uncharacterized protein
2107	KAG6412540.1	91.071	56	5	0	1	56	3225	3280	5.82e-15	79.7	KAG6412540.1	87	51	51	0	91.07	1	1	TGCAGACACCGTCATCATATTTGACTCGGATTGGAATCCACAAAATGACTTACAGG	TGCAGACACGGTTATCATATTTGATTCCGATTGGAATCCGCAAAATGACTTACAGG	69	5352	KAG6412540.1	chromodomain-helicase-DNA-binding protein 1 [EC:3.6.4.12]	K11367
2111	KAG6405148.1	93.939	66	4	0	4	69	3454	3519	5.1e-22	102	KAG6405148.1	112	62	62	0	93.94	1	1	AGACACCTTGATCGCCGGAAGCGGCTCATAATCGCCATGGATGCAGCTTTTGGAATGGAATATTTG	AGACACCTTGATCGCCGGAAGCGGCTTATAATTGCCATGGACGCAGCTTTTGGGATGGAATATTTG	69	3966	KAG6405148.1	Hypothetical protein	Uncharacterized protein
2111	KAG6407307.1	93.939	66	4	0	4	69	3211	3276	5.1e-22	102	KAG6407307.1	112	62	62	0	93.94	1	1	AGACACCTTGATCGCCGGAAGCGGCTCATAATCGCCATGGATGCAGCTTTTGGAATGGAATATTTG	AGACACCTTGATCGCCGGAAGCGGCTTATAATTGCCATGGACGCAGCTTTTGGGATGGAATATTTG	69	3759	KAG6407307.1	Hypothetical protein	Uncharacterized protein
2111	KAG6385660.1	92.424	66	5	0	4	69	3112	3177	2.17e-20	97.8	KAG6385660.1	107	61	61	0	92.42	1	1	AGACACCTTGATCGCCGGAAGCGGCTCATAATCGCCATGGATGCAGCTTTTGGAATGGAATATTTG	AGACATCTTGATCGTCGCAAGAGGCTCACAATCGCCATGGATGCAGCTTTTGGAATGGAATATTTG	69	3654	KAG6385660.1	Hypothetical protein	Uncharacterized protein
2112	KAG6405148.1	93.939	66	4	0	4	69	3454	3519	5.1e-22	102	KAG6405148.1	112	62	62	0	93.94	1	1	AGACACCTTGATCGCCGGAAGCGGCTCATAATCGCCATGGATGCAGCTTTTGGAATGGAATATTTG	AGACACCTTGATCGCCGGAAGCGGCTTATAATTGCCATGGACGCAGCTTTTGGGATGGAATATTTG	69	3966	KAG6405148.1	Hypothetical protein	Uncharacterized protein
2112	KAG6407307.1	93.939	66	4	0	4	69	3211	3276	5.1e-22	102	KAG6407307.1	112	62	62	0	93.94	1	1	AGACACCTTGATCGCCGGAAGCGGCTCATAATCGCCATGGATGCAGCTTTTGGAATGGAATATTTG	AGACACCTTGATCGCCGGAAGCGGCTTATAATTGCCATGGACGCAGCTTTTGGGATGGAATATTTG	69	3759	KAG6407307.1	Hypothetical protein	Uncharacterized protein
2112	KAG6385660.1	92.424	66	5	0	4	69	3112	3177	2.17e-20	97.8	KAG6385660.1	107	61	61	0	92.42	1	1	AGACACCTTGATCGCCGGAAGCGGCTCATAATCGCCATGGATGCAGCTTTTGGAATGGAATATTTG	AGACATCTTGATCGTCGCAAGAGGCTCACAATCGCCATGGATGCAGCTTTTGGAATGGAATATTTG	69	3654	KAG6385660.1	Hypothetical protein	Uncharacterized protein
2113	KAG6403690.1	86.957	69	9	0	1	69	1332	1264	1.37e-16	85.1	KAG6403690.1	93	60	60	0	86.96	1	-1	TGCAGACACGATGTTGCTAGCGTGGGCATTGAAGCCCCCCAGAGCTCCGGCGACAGCCGAGCCGGTGAG	TGCAGATACAATGTTGCTAGCATGAGCATTGAAGCCCCCAAGAGCTCCAGCCACAGCGGAGCCAGTGAG	69	1698	KAG6403690.1	hydroxymethylglutaryl-CoA reductase (NADPH) [EC:1.1.1.34]	K00021
2113	KAG6403691.1	86.957	69	9	0	1	69	1332	1264	1.37e-16	85.1	KAG6403691.1	93	60	60	0	86.96	1	-1	TGCAGACACGATGTTGCTAGCGTGGGCATTGAAGCCCCCCAGAGCTCCGGCGACAGCCGAGCCGGTGAG	TGCAGATACAATGTTGCTAGCATGAGCATTGAAGCCCCCAAGAGCTCCAGCCACAGCGGAGCCAGTGAG	69	1698	KAG6403691.1	hydroxymethylglutaryl-CoA reductase (NADPH) [EC:1.1.1.34]	K00021
2113	KAG6403689.1	86.957	69	9	0	1	69	1332	1264	1.37e-16	85.1	KAG6403689.1	93	60	60	0	86.96	1	-1	TGCAGACACGATGTTGCTAGCGTGGGCATTGAAGCCCCCCAGAGCTCCGGCGACAGCCGAGCCGGTGAG	TGCAGATACAATGTTGCTAGCATGAGCATTGAAGCCCCCAAGAGCTCCAGCCACAGCGGAGCCAGTGAG	69	1698	KAG6403689.1	hydroxymethylglutaryl-CoA reductase (NADPH) [EC:1.1.1.34]	K00021
2114	KAG6428615.1	89.231	65	7	0	1	65	1687	1751	3.92e-17	86.9	KAG6428615.1	95	58	58	0	89.23	1	1	TGCAGACACGCCTTATCAGTTCTCCAACTATCAGGCATTTCTACCATTCCGCCAGACTACATACT	TGCAGACACGCCTTATCAATTCTCCAACTATCAGGCATTTCCACTATTCCGTCAAACTCTATACT	69	2406	KAG6428615.1	Hypothetical protein	Uncharacterized protein
2114	KAG6431708.1	91.379	58	5	0	1	58	1609	1666	4.77e-16	83.3	KAG6431708.1	91	53	53	0	91.38	1	1	TGCAGACACGCCTTATCAGTTCTCCAACTATCAGGCATTTCTACCATTCCGCCAGACT	TGCAGACACACCTTATCAGTTCTCCAACTATCAGGCATTTCCACTATTCCGTCAAACT	69	2328	KAG6431708.1	Hypothetical protein	Uncharacterized protein
2121	KAG6400367.1	89.062	64	7	0	6	69	927	864	1.37e-16	85.1	KAG6400367.1	93	57	57	0	89.06	1	-1	ACACTGAGTGCGAGTACATAGGGAGACATTCTGAAGTTCATCCAAAATAATTTTCGCTCTTTCA	ACACTGAGTGCGAGTATAGAGAGAGAAATGCTGAAGCTCATCCAAAATAATTTTTGCTCTTTCA	69	3939	KAG6400367.1	Hypothetical protein	Uncharacterized protein
2121	KAG6402573.1	89.062	64	7	0	6	69	996	933	1.37e-16	85.1	KAG6402573.1	93	57	57	0	89.06	1	-1	ACACTGAGTGCGAGTACATAGGGAGACATTCTGAAGTTCATCCAAAATAATTTTCGCTCTTTCA	ACACTGAGTGCGAGTATAGAGAGAGAAATGCTGAAGCTCATCCAAAATAATTTTTGCTCTTTCA	69	3741	KAG6402573.1	Hypothetical protein	Uncharacterized protein
2121	KAG6403093.1	89.062	64	7	0	6	69	903	840	1.37e-16	85.1	KAG6403093.1	93	57	57	0	89.06	1	-1	ACACTGAGTGCGAGTACATAGGGAGACATTCTGAAGTTCATCCAAAATAATTTTCGCTCTTTCA	ACACTGAGTGCGAGTATAGAGAGAGAAATGCTGAAGCTCATCCAAAATAATTTTTGCTCTTTCA	69	3399	KAG6403093.1	Hypothetical protein	Uncharacterized protein
2126	KAG6398363.1	85.075	67	10	0	3	69	221	287	2.03e-14	77	KAG6398363.1	84	57	57	0	85.07	1	1	CAGACACTTCTGATTGTACAGAGGGAATTGTTGCTGAAGGTGTTGATTTAGAAACGCCACAAGAGTT	CAGAAATTTCTGATTTTACTGAGGGAATTGTAGCTCAGAGTGTTGATTTAGAAACGCCAGAAGATTT	69	1122	KAG6398363.1	Hypothetical protein	Uncharacterized protein
2126	KAG6396091.1	82.09	67	12	0	3	69	221	287	1.05e-11	68	KAG6396091.1	74	55	55	0	82.09	1	1	CAGACACTTCTGATTGTACAGAGGGAATTGTTGCTGAAGGTGTTGATTTAGAAACGCCACAAGAGTT	CAGAAATTTCTGATTCTACAGAGGAATTTGTAGCTCAGAGTGTTGAATTAGAAACGCCACAGGATTT	69	1137	KAG6396091.1	Hypothetical protein	Uncharacterized protein
2129	KAG6404867.1	89.796	49	5	0	2	50	1480	1528	3.67e-11	67.1	KAG6404867.1	73	44	44	0	89.8	1	1	GCAGACACTTTCAGAATCCCAGATGAGATTGACATGTCCCATCTCAGTT	GCAGACACTTTCAGAATTCCAGATGAGGTTGATTTATCCCATCTCAGTT	69	1530	KAG6404867.1	diacylglycerol kinase (ATP) [EC:2.7.1.107]	K00901
2143	KAG6427032.1	84.058	69	11	0	1	69	442	510	7.08e-14	76.1	KAG6427032.1	83	58	58	0	84.06	1	1	TGCAGACAGACCGGAGCCATGCTGTCCATCCGGGACCATGAGACGGATCCAGGTCTGAGAAACATCGAG	TGCAGACAAACAGGAGCCAAGCTATCCATTCGGGACCATGAAACAGATCCCAGTCTAAGAAACATTGAG	69	747	KAG6427032.1	Hypothetical protein	Uncharacterized protein
2146	KAG6420200.1	88.06	67	8	0	3	69	520	586	3.92e-17	86	KAG6420200.1	94	59	59	0	88.06	1	1	CAGACAGAGAAGTCTCCCTATCAGTACAGGGGAATGTTTCATGCTTTATCCACTGTGCTTCGTGAGG	CAGACAGACAAGTCTCCTTATCAGTATAGAGGAATGGTTCATGCTTTATCAACCGTGCTTCGAGAGG	69	1065	KAG6420200.1	solute carrier family 25 (mitochondrial phosphate transporter), member 23/24/25/41	K14684
2150	KAG6411073.1	89.855	69	7	0	1	69	223	155	2.64e-19	94.2	KAG6411073.1	103	62	62	0	89.86	1	-1	TGCAGACAGCATCCTTGAGCTTCTCGAGCCAGTCTCGAACCTCGTGGTTCTTGAACTGCTGCTCCTCTG	TGCAGACAGCATCCTTGAGCTTTTGGAGCCAGTCCCGGACCTCGTGATTCTTCAACTGCTGCTCTTCTG	69	2460	KAG6411073.1	Hypothetical protein	Uncharacterized protein
2150	KAG6413680.1	89.552	67	7	0	1	67	223	157	3.22e-18	90.6	KAG6413680.1	99	60	60	0	89.55	1	-1	TGCAGACAGCATCCTTGAGCTTCTCGAGCCAGTCTCGAACCTCGTGGTTCTTGAACTGCTGCTCCTC	TGCAGACAGCATCCTTGAGCTTCTGGAGCCAGTCCCGCACCTCGTGATTCTTCAACTGTTGCTCTTC	69	2334	KAG6413680.1	Hypothetical protein	Uncharacterized protein
2153	KAG6412186.1	88.679	53	6	0	5	57	1510	1562	3.01e-12	69.8	KAG6412186.1	76	47	47	0	88.68	1	1	GACAGCTCAGAAGGCCTTCCTCCCATTATACGACGTTGCTTTAGTCATGAAAT	GACAGCTCTGAAGGTCTTCCTCCAATTATCCGACGCTGTTTTAGTCATGAAAT	69	2781	KAG6412186.1	peroxin-6	K13339
2160	KAG6409314.1	87.692	65	8	0	3	67	1316	1252	4.77e-16	82.4	KAG6409314.1	90	57	57	0	87.69	1	-1	CAGACAGGCAGTAAAATGAGAGCCATGTTCAATTTCAAAGTCTCGCCTGCACCCTTAGCCGTGAG	CAGACAGGCAATAATATGAGCGCCATGTTGAATTTCAAAGTCTCAGCAGCGCCCTTAGCCGTGAG	69	2838	KAG6409314.1	respiratory burst oxidase [EC:1.6.3.- 1.11.1.-]	K13447
2160	KAG6388272.1	86.154	65	9	0	3	67	1307	1243	2.03e-14	77.9	KAG6388272.1	85	56	56	0	86.15	1	-1	CAGACAGGCAGTAAAATGAGAGCCATGTTCAATTTCAAAGTCTCGCCTGCACCCTTAGCCGTGAG	CACACAGGCAGTAATATGAGCGCCATGTTGAATTTCAAAGTCTCTGCTGCGCCTTTGGCCGTGAG	69	2826	KAG6388272.1	respiratory burst oxidase [EC:1.6.3.- 1.11.1.-]	K13447
2162	KAG6387037.1	90.769	65	6	0	5	69	497	561	9.22e-19	91.5	KAG6387037.1	100	59	59	0	90.77	1	1	GACAGGGCAAGAACCCTTTGGCCCTTGTCATGGCTCCAACCAGAGAACTTGCACGACAGGTGGAC	GACAGGGCAGGAATCCGTTGGCCCTTGTCATGGCTCCAACAAGAGAACTTGCTCGACAGGTAGAC	69	2025	KAG6387037.1	Hypothetical protein	Uncharacterized protein
2162	KAG6385193.1	89.231	65	7	0	5	69	497	561	3.92e-17	86.9	KAG6385193.1	95	58	58	0	89.23	1	1	GACAGGGCAAGAACCCTTTGGCCCTTGTCATGGCTCCAACCAGAGAACTTGCACGACAGGTGGAC	GACAGGGAAGGAATCCGTTGGCCCTTGTCATGGCTCCAACAAGAGAACTTGCTCGACAGGTTGAC	69	1860	KAG6385193.1	Hypothetical protein	Uncharacterized protein
2207	KAG6435156.1	87.692	65	8	0	4	68	77	141	4.77e-16	82.4	KAG6435156.1	90	57	57	0	87.69	1	1	AGACATGGATGTTGAGAGTGTCGATTCATTGCGGTGGATGCAGAAAGAAAGTGAAGAAAGTTCTT	AGACATGGATCTTGAGAGTGTCAATTCATTGTGGAGGATGCCAAAAGAAAGTAAAGAAAGTCCTT	69	732	KAG6435156.1	Hypothetical protein	Uncharacterized protein
2210	KAG6420276.1	87.719	57	6	1	4	59	1493	1549	1.05e-11	68.9	KAG6420276.1	75	50	50	1	87.72	1	1	AGACATGGTTGGTGGGAGATGGACTAAGCGAAACTGATCAGCTTACAG-ATCGGAAG	AGATATGGTTGGTGGGAGATGGACTAAGCGAAACAGATCAACTAAAAGCATCGAAAG	69	1848	KAG6420276.1	aldehyde decarbonylase [EC:4.1.99.5]	K15404
2211	KAG6425259.1	88.406	69	8	0	1	69	380	448	3.22e-18	89.7	KAG6425259.1	98	61	61	0	88.41	1	1	TGCAGACATGGTTTGGAACCAGATTACCAGCTGTCATGGGAGGTTCATACACCTTCGTCGCCCCCACAA	TGCAAACGTGGTTTGGCACCAGATTACCTGTTGTAATTGGAGGTTCATACACCTTCGTCGCACCCACAA	69	1734	KAG6425259.1	solute carrier family 23 (nucleobase transporter), member 1	K14611
2211	KAG6422196.1	88.06	67	8	0	3	69	388	454	3.92e-17	86	KAG6422196.1	94	59	59	0	88.06	1	1	CAGACATGGTTTGGAACCAGATTACCAGCTGTCATGGGAGGTTCATACACCTTCGTCGCCCCCACAA	CAAACGTGGTTTGGCACCAGATTACCTGTTGTAATTGGAGGTTCATACACCTTCGTCGCACCCACAA	69	1740	KAG6422196.1	solute carrier family 23 (nucleobase transporter), member 1	K14611
2211	KAG6386161.1	86.957	69	9	0	1	69	248	316	1.37e-16	85.1	KAG6386161.1	93	60	60	0	86.96	1	1	TGCAGACATGGTTTGGAACCAGATTACCAGCTGTCATGGGAGGTTCATACACCTTCGTCGCCCCCACAA	TGCAAACATGGTTTGGAACCCGATTACCTGCTGTGATTGGTGGCTCATACACCTTCGTGGCGCCCACAA	69	1533	KAG6386161.1	solute carrier family 23 (nucleobase transporter), member 1	K14611
2212	KAG6425259.1	88.406	69	8	0	1	69	380	448	3.22e-18	89.7	KAG6425259.1	98	61	61	0	88.41	1	1	TGCAGACATGGTTTGGAACCAGATTACCAGCTGTCATGGGAGGTTCATACACCTTCGTCGCCCCCACAA	TGCAAACGTGGTTTGGCACCAGATTACCTGTTGTAATTGGAGGTTCATACACCTTCGTCGCACCCACAA	69	1734	KAG6425259.1	solute carrier family 23 (nucleobase transporter), member 1	K14611
2212	KAG6422196.1	88.06	67	8	0	3	69	388	454	3.92e-17	86	KAG6422196.1	94	59	59	0	88.06	1	1	CAGACATGGTTTGGAACCAGATTACCAGCTGTCATGGGAGGTTCATACACCTTCGTCGCCCCCACAA	CAAACGTGGTTTGGCACCAGATTACCTGTTGTAATTGGAGGTTCATACACCTTCGTCGCACCCACAA	69	1740	KAG6422196.1	solute carrier family 23 (nucleobase transporter), member 1	K14611
2212	KAG6386161.1	86.957	69	9	0	1	69	248	316	1.37e-16	85.1	KAG6386161.1	93	60	60	0	86.96	1	1	TGCAGACATGGTTTGGAACCAGATTACCAGCTGTCATGGGAGGTTCATACACCTTCGTCGCCCCCACAA	TGCAAACATGGTTTGGAACCCGATTACCTGCTGTGATTGGTGGCTCATACACCTTCGTGGCGCCCACAA	69	1533	KAG6386161.1	solute carrier family 23 (nucleobase transporter), member 1	K14611
2217	KAG6416254.1	95.238	63	3	0	7	69	1966	2028	1.78e-21	101	KAG6416254.1	111	60	60	0	95.24	1	1	CATTCTCTTCCAGGTCCTCTTACCGGTGGAAGTGTTGCCACTAAGGAGTTGAACAAATGGATT	CATTCTCTTCCAGGTCCTCTTACAGGTGGAAGTGTGGCCACTAAGGAGTTGAATAAATGGATT	69	4347	KAG6416254.1	COPII coat assembly protein SEC16	K20353
2217	KAG6418770.1	95.238	63	3	0	7	69	2023	2085	1.78e-21	101	KAG6418770.1	111	60	60	0	95.24	1	1	CATTCTCTTCCAGGTCCTCTTACCGGTGGAAGTGTTGCCACTAAGGAGTTGAACAAATGGATT	CATTCTCTTCCAGGTCCTCTTACAGGTGGAAGTGTGGCCACTAAGGAGTTGAATAAATGGATT	69	5949	KAG6418770.1	Hypothetical protein	Uncharacterized protein
2217	KAG6427754.1	94.915	59	3	0	11	69	1835	1893	2.64e-19	94.2	KAG6427754.1	103	56	56	0	94.92	1	1	CTCTTCCAGGTCCTCTTACCGGTGGAAGTGTTGCCACTAAGGAGTTGAACAAATGGATT	CTCTTCCAGGTCCTCTTACTGGTGGAAGTGTGGCCACTAAGGAGTTGAATAAATGGATT	69	4254	KAG6427754.1	COPII coat assembly protein SEC16	K20353
2229	KAG6384227.1	94.828	58	3	0	6	63	1021	1078	9.22e-19	92.4	KAG6384227.1	101	55	55	0	94.83	1	1	ACATTTGCAACACTTAGTCCTATACCAGGTTACATGCAATGGCTTTTGTCCAAACTGG	ACATTTGCGACTCTTAGTCCTATACCAGGTTACATGCAATGGCTTTTGTCAAAACTGG	69	1638	KAG6384227.1	malonyl-CoA decarboxylase [EC:4.1.1.9]	K01578
2229	KAG6420499.1	94.828	58	3	0	6	63	886	943	9.22e-19	92.4	KAG6420499.1	101	55	55	0	94.83	1	1	ACATTTGCAACACTTAGTCCTATACCAGGTTACATGCAATGGCTTTTGTCCAAACTGG	ACATTTGCGACACTTAGTCCTATACCAGGTTACATGCAATGGATTTTGTCAAAACTGG	69	1995	KAG6420499.1	malonyl-CoA decarboxylase [EC:4.1.1.9]	K01578
2229	KAG6423547.1	94.828	58	3	0	6	63	976	1033	9.22e-19	92.4	KAG6423547.1	101	55	55	0	94.83	1	1	ACATTTGCAACACTTAGTCCTATACCAGGTTACATGCAATGGCTTTTGTCCAAACTGG	ACATTTGCGACTCTTAGTCCTATACCAGGTTACATGCAATGGCTTTTGTCAAAACTGG	69	3327	KAG6423547.1	chitin elicitor receptor kinase 1	K13429
2250	KAG6432029.1	84.722	72	8	1	1	69	1947	1876	5.82e-15	79.7	KAG6432029.1	87	61	61	3	84.72	1	-1	TGCAGACCACTGCCTCGTTGAATCAGCTGCA---TTCATCGCACGATCTCTTTCTTTCTCCAAAACAGCCAT	TGCAGACCACTGCCTTGTCGAATCAGCTGCATTCTTCACCACACTATTTCTTTCTTTCTCCATGACAGCCAT	69	4719	KAG6432029.1	Hypothetical protein	Uncharacterized protein
2250	KAG6435329.1	84.722	72	8	1	1	69	351	280	5.82e-15	79.7	KAG6435329.1	87	61	61	3	84.72	1	-1	TGCAGACCACTGCCTCGTTGAATCAGCTGCA---TTCATCGCACGATCTCTTTCTTTCTCCAAAACAGCCAT	TGCAGACCACTGCCTTGTCGAATCAGCTGCATTCTTCACCACACAATTTCTTTCTTTCTCCATGACAGCCAT	69	3123	KAG6435329.1	Hypothetical protein	Uncharacterized protein
2255	KAG6397858.1	98.551	69	1	0	1	69	142	74	1.9e-27	121	KAG6397858.1	133	68	68	0	98.55	1	-1	TGCAGACCAGGAAAATGAACAGTGATATGACAGTGTATATAACCTTCTCTCTGAATGGAACCTTCCTGT	TGCAGACCAGGAAAATGAACAGAGATATGACAGTGTATATAACCTTCTCTCTGAATGGAACCTTCCTGT	69	1428	KAG6397858.1	protein transport protein SEC61 subunit alpha	K10956
2255	KAG6393825.1	97.101	69	2	0	1	69	142	74	2.31e-26	116	KAG6393825.1	128	67	67	0	97.1	1	-1	TGCAGACCAGGAAAATGAACAGTGATATGACAGTGTATATAACCTTCTCTCTGAATGGAACCTTCCTGT	TGCAGACGAGGAAAATGAACAGAGATATGACAGTGTATATAACCTTCTCTCTGAATGGAACCTTCCTGT	69	1782	KAG6393825.1	protein transport protein SEC61 subunit alpha	K10956
2255	KAG6395580.1	97.101	69	2	0	1	69	142	74	2.31e-26	116	KAG6395580.1	128	67	67	0	97.1	1	-1	TGCAGACCAGGAAAATGAACAGTGATATGACAGTGTATATAACCTTCTCTCTGAATGGAACCTTCCTGT	TGCAGACCAGGAAAATGAACAGAGATATGACAGTGTATATAACCTTCTCTCTGAATGGGACCTTCCTGT	69	2808	KAG6395580.1	protein transport protein SEC61 subunit alpha	K10956
2261	KAG6438290.1	86.364	66	9	0	1	66	1088	1153	5.82e-15	79.7	KAG6438290.1	87	57	57	0	86.36	1	1	TGCAGACCATATCAGACCTGGAGAATAAATTACTACTTGCTGAAGAAAATTTGTCAGGGTTTACAG	TGGAGATAATATCAAAGATGGAGAATAAATTACTACTTGCTGAAGAAAATTCTTCAGGGTTTAAAG	69	6447	KAG6438290.1	Hypothetical protein	Uncharacterized protein
2261	KAG6383952.1	85.714	63	9	0	1	63	1613	1675	2.47e-13	74.3	KAG6383952.1	81	54	54	0	85.71	1	1	TGCAGACCATATCAGACCTGGAGAATAAATTACTACTTGCTGAAGAAAATTTGTCAGGGTTTA	TGGAGATCATATCAAACATGGAGAATAAGTTACGTCTTGCTGAAGAAAATTCTTCAGGGTTTA	69	5328	KAG6383952.1	Hypothetical protein	Uncharacterized protein
2261	KAG6402996.1	85.714	63	9	0	1	63	995	1057	2.47e-13	74.3	KAG6402996.1	81	54	54	0	85.71	1	1	TGCAGACCATATCAGACCTGGAGAATAAATTACTACTTGCTGAAGAAAATTTGTCAGGGTTTA	TGGAGATCATATCAAACATGGAGAATAAGTTACGTCTTGCTGAAGAAAATTCTTCAGGGTTTA	69	5271	KAG6402996.1	Hypothetical protein	Uncharacterized protein
2263	KAG6418988.1	95.238	42	2	0	1	42	675	716	1.05e-11	68	KAG6418988.1	74	40	40	0	95.24	1	1	TGCAGACCATATCTTTGGACTTGTCTTGATGAATGACTGGAG	TGCAAACCATATATTTGGACTTGTCTTGATGAATGACTGGAG	69	1185	KAG6418988.1	fumarylacetoacetase [EC:3.7.1.2]	K01555
2268	KAG6402336.1	92.754	69	5	0	1	69	535	467	5.1e-22	103	KAG6402336.1	113	64	64	0	92.75	1	-1	TGCAGACCATGTAGAGGATGTCTGTAAACAATTGTGCATCTTTTCCACCATCAAGACCAGGATCACCTT	TGCAGACCATGTTGAAAATGTCTGTAAATAACTGTGCATCTTTTCCACCATCAAGACCAGGATCACCTT	69	5304	KAG6402336.1	guanine nucleotide-exchange factor	K13462
2268	KAG6404700.1	91.304	69	6	0	1	69	535	467	6.21e-21	98.7	KAG6404700.1	108	63	63	0	91.3	1	-1	TGCAGACCATGTAGAGGATGTCTGTAAACAATTGTGCATCTTTTCCACCATCAAGACCAGGATCACCTT	TGCAAACCATGTTGAAAATGTCTGTAAATAACTGTGCATCTTTTCCACCATCAAGACCAGGATCACCTT	69	5427	KAG6404700.1	guanine nucleotide-exchange factor	K13462
2268	KAG6388165.1	82.609	69	12	0	1	69	559	491	8.63e-13	71.6	KAG6388165.1	78	57	57	0	82.61	1	-1	TGCAGACCATGTAGAGGATGTCTGTAAACAATTGTGCATCTTTTCCACCATCAAGACCAGGATCACCTT	TGCAAACCATGTTGAGTATGTCTGTCAACAATTTTGAATTGTTATCGCCATCAATACCAGGATCACCTT	69	5409	KAG6388165.1	guanine nucleotide-exchange factor	K13462
2271	KAG6389016.1	88.406	69	8	0	1	69	1547	1479	3.22e-18	89.7	KAG6389016.1	98	61	61	0	88.41	1	-1	TGCAGACCCAATGCAAAAGCAGCTGCACGACTTTTTCCCATCTCCTGGACAACTCTGGCTGCTGCGTGC	TGCAGCCCAAATGCGAAAGCAGCAGCACGACTTTTTCCCATTTCCTGGACAACTCTGCTTGCTGCATGC	69	3660	KAG6389016.1	Hypothetical protein	Uncharacterized protein
2271	KAG6384845.1	86.957	69	9	0	1	69	1532	1464	1.37e-16	85.1	KAG6384845.1	93	60	60	0	86.96	1	-1	TGCAGACCCAATGCAAAAGCAGCTGCACGACTTTTTCCCATCTCCTGGACAACTCTGGCTGCTGCGTGC	TGTAGACCTAATGCAAACGCAGCAGCACGACTTTTTCCCATTTCCTGAACAACTCTGCTTGCTGCATGC	69	2580	KAG6384845.1	Hypothetical protein	Uncharacterized protein
2271	KAG6386921.1	86.667	60	8	0	10	69	923	864	2.47e-13	73.4	KAG6386921.1	80	52	52	0	86.67	1	-1	AATGCAAAAGCAGCTGCACGACTTTTTCCCATCTCCTGGACAACTCTGGCTGCTGCGTGC	AATGCAAATGCAGCAGCACGACTTTTTCCCATTTCCTGAACAACTCTGCTTACTGCATGC	69	1299	KAG6386921.1	Hypothetical protein	Uncharacterized protein
2272	KAG6437138.1	85.075	67	10	0	3	69	1001	1067	2.03e-14	77	KAG6437138.1	84	57	57	0	85.07	1	1	CAGACCCACAAAATATTGTGCTTCTTGTGCCCAAAGATATCCGAGAGAAGAGTTGCTCAAAAAGTTC	CAGAGCCACAAAATATTGTGCTTCTTGTTCCCAAAGATTTACAAGAAAAAGGTCGCTCAGAAAGTTC	69	2784	KAG6437138.1	Hypothetical protein	Uncharacterized protein
2272	KAG6433831.1	83.582	67	11	0	3	69	1013	1079	8.63e-13	72.5	KAG6433831.1	79	56	56	0	83.58	1	1	CAGACCCACAAAATATTGTGCTTCTTGTGCCCAAAGATATCCGAGAGAAGAGTTGCTCAAAAAGTTC	CAGAGCCACAAAATATAGTGCTTCTTGTTCCCAAAGATTTACAAGAAAAAGGTCGCTCAGAAAGTTC	69	2802	KAG6433831.1	Hypothetical protein	Uncharacterized protein
2274	KAG6427344.1	93.333	60	4	0	10	69	1196	1137	9.22e-19	91.5	KAG6427344.1	100	56	56	0	93.33	1	-1	ACCAATTTCCCATCTGCATCAAGAACTCTCATGCGCTCATCAACAGGGATAAATCCACGT	ACCAACTTCCCATTTGCATCAATAACTCTCATGCGCTCATCAACAGGGACAAATCCACGT	69	1722	KAG6427344.1	dihydrolipoamide dehydrogenase [EC:1.8.1.4]	K00382
2274	KAG6430403.1	93.333	60	4	0	10	69	1196	1137	9.22e-19	91.5	KAG6430403.1	100	56	56	0	93.33	1	-1	ACCAATTTCCCATCTGCATCAAGAACTCTCATGCGCTCATCAACAGGGATAAATCCACGT	ACCAACTTCCCATTTGCATCAATAACTCTCATGCGCTCATCAACAGGGACAAATCCACGT	69	1794	KAG6430403.1	Hypothetical protein	Uncharacterized protein
2274	KAG6434125.1	93.333	60	4	0	10	69	1178	1119	9.22e-19	91.5	KAG6434125.1	100	56	56	0	93.33	1	-1	ACCAATTTCCCATCTGCATCAAGAACTCTCATGCGCTCATCAACAGGGATAAATCCACGT	ACCAACTTCCCATTTGCATCAATAACTCTCATGCGCTCATCAACAGGGACAAATCCACGT	69	1704	KAG6434125.1	dihydrolipoamide dehydrogenase [EC:1.8.1.4]	K00382
2276	KAG6404648.1	87.692	65	8	0	4	68	688	752	4.77e-16	82.4	KAG6404648.1	90	57	57	0	87.69	1	1	AGACCCATGATTGATCCTGTTGCCACAACTTTTGATCGGCTTCTTTGTGGAAGAAGATCTCAATC	AGACCTGTAATAGATCCTGTTGCCACAATTTTTGATCGGCTGCTTTGCGGAAGAAGATCTGAATC	69	933	KAG6404648.1	Hypothetical protein	Uncharacterized protein
2276	KAG6402290.1	84.848	66	10	0	4	69	688	753	7.08e-14	75.2	KAG6402290.1	82	56	56	0	84.85	1	1	AGACCCATGATTGATCCTGTTGCCACAACTTTTGATCGGCTTCTTTGTGGAAGAAGATCTCAATCC	AGACCTGTAATAGATCCTGTTGCCACAATTATTGAGCGGCTGCTTTGCGGAAGAAGATCTGAATCC	69	933	KAG6402290.1	Hypothetical protein	Uncharacterized protein
2277	KAG6417841.1	84.058	69	11	0	1	69	2304	2236	7.08e-14	76.1	KAG6417841.1	83	58	58	0	84.06	1	-1	TGCAGACCCATGTTTCTTCTTCCCACTGATTGTTCCAGTTAGGACTGCATCGACTTGGTGTTCTTGAGC	TGCAGACCCATGTTTCTTCTTCCCACTATTTGGTGCAGTTGGGACAGCAGCATCCAGGTGTTCTTGAGC	69	4914	KAG6417841.1	Hypothetical protein	Uncharacterized protein
2277	KAG6415321.1	82.609	69	12	0	1	69	2304	2236	8.63e-13	71.6	KAG6415321.1	78	57	57	0	82.61	1	-1	TGCAGACCCATGTTTCTTCTTCCCACTGATTGTTCCAGTTAGGACTGCATCGACTTGGTGTTCTTGAGC	TGCAGACCCATGTTTCTTCTTCCCACTATTTGGTGCAGTTGGGACAGCAGCATCCAGATGTTCTTGAGC	69	4911	KAG6415321.1	Hypothetical protein	Uncharacterized protein
2277	KAG6431867.1	82.609	69	12	0	1	69	2295	2227	8.63e-13	71.6	KAG6431867.1	78	57	57	0	82.61	1	-1	TGCAGACCCATGTTTCTTCTTCCCACTGATTGTTCCAGTTAGGACTGCATCGACTTGGTGTTCTTGAGC	TGCAGACCCATGTTTCTTCTTCCAGCTATTTGGTGCAGTTGGGACAGCAACATCTTGGCGTTCTTGAGC	69	4869	KAG6431867.1	Hypothetical protein	Uncharacterized protein
2278	KAG6417841.1	84.058	69	11	0	1	69	2304	2236	7.08e-14	76.1	KAG6417841.1	83	58	58	0	84.06	1	-1	TGCAGACCCATGTTTCTTCTTCCCACTGATTGTTCCAGTTAGGACTGCATCGACTTGGTGTTCTTGAGC	TGCAGACCCATGTTTCTTCTTCCCACTATTTGGTGCAGTTGGGACAGCAGCATCCAGGTGTTCTTGAGC	69	4914	KAG6417841.1	Hypothetical protein	Uncharacterized protein
2278	KAG6415321.1	82.609	69	12	0	1	69	2304	2236	8.63e-13	71.6	KAG6415321.1	78	57	57	0	82.61	1	-1	TGCAGACCCATGTTTCTTCTTCCCACTGATTGTTCCAGTTAGGACTGCATCGACTTGGTGTTCTTGAGC	TGCAGACCCATGTTTCTTCTTCCCACTATTTGGTGCAGTTGGGACAGCAGCATCCAGATGTTCTTGAGC	69	4911	KAG6415321.1	Hypothetical protein	Uncharacterized protein
2278	KAG6431867.1	82.609	69	12	0	1	69	2295	2227	8.63e-13	71.6	KAG6431867.1	78	57	57	0	82.61	1	-1	TGCAGACCCATGTTTCTTCTTCCCACTGATTGTTCCAGTTAGGACTGCATCGACTTGGTGTTCTTGAGC	TGCAGACCCATGTTTCTTCTTCCAGCTATTTGGTGCAGTTGGGACAGCAACATCTTGGCGTTCTTGAGC	69	4869	KAG6431867.1	Hypothetical protein	Uncharacterized protein
2279	KAG6398415.1	85.075	67	10	0	3	69	4234	4300	2.03e-14	77	KAG6398415.1	84	57	57	0	85.07	1	1	CAGACCCATTTACATCAAGCCTTGCTTCTTCCCCTTGAGAGTGCATTTTCTCACTTTGACTTCAATA	CAGATCCATCTACATCAAGCCTTGCTAGTTCCTCTGGAGAGTGCATTTTCTCTATATGATTTCAATA	69	15309	KAG6398415.1	E3 ubiquitin-protein ligase UBR4 [EC:2.3.2.27]	K10691
2279	KAG6405861.1	81.159	69	13	0	1	69	4175	4243	3.67e-11	67.1	KAG6405861.1	73	56	56	0	81.16	1	1	TGCAGACCCATTTACATCAAGCCTTGCTTCTTCCCCTTGAGAGTGCATTTTCTCACTTTGACTTCAATA	TGCAGATCCATCTACATCAAGCGTTGCTAATTCCTTTGGAGAGTGCATTTTTGCTATTTGATTTCAATA	69	15039	KAG6405861.1	E3 ubiquitin-protein ligase UBR4 [EC:2.3.2.27]	K10691
2279	KAG6408148.1	81.159	69	13	0	1	69	4163	4231	3.67e-11	67.1	KAG6408148.1	73	56	56	0	81.16	1	1	TGCAGACCCATTTACATCAAGCCTTGCTTCTTCCCCTTGAGAGTGCATTTTCTCACTTTGACTTCAATA	TGCAGATCCATCTACATCAAGCGTTGCTAATTCCTTTGGAGAGTGCATTTTTGCTATTTGATTTCAATA	69	15174	KAG6408148.1	E3 ubiquitin-protein ligase UBR4 [EC:2.3.2.27]	K10691
2281	KAG6400613.1	89.855	69	7	0	1	69	1154	1086	2.64e-19	94.2	KAG6400613.1	103	62	62	0	89.86	1	-1	TGCAGACCCCACACCGGCCTCACCCACGGGTCGTCCTTCCCATACATGAGACAGATGGGTGTGTTGTTC	TGCAAACCCCAGACAGGCCTCACCCAAGGGTCGTCCTTCCCGTACATGAGACAAATGGGTGTATTGTTC	69	1452	KAG6400613.1	Hypothetical protein	Uncharacterized protein
2281	KAG6400604.1	89.855	69	7	0	1	69	1250	1182	2.64e-19	94.2	KAG6400604.1	103	62	62	0	89.86	1	-1	TGCAGACCCCACACCGGCCTCACCCACGGGTCGTCCTTCCCATACATGAGACAGATGGGTGTGTTGTTC	TGCAAACCCCAGACAGGCCTCACCCAAGGGTCGTCCTTCCCGTACATGAGACAAATGGGTGTTTTGTTC	69	1548	KAG6400604.1	Hypothetical protein	Uncharacterized protein
2281	KAG6402814.1	88.406	69	8	0	1	69	1562	1494	3.22e-18	89.7	KAG6402814.1	98	61	61	0	88.41	1	-1	TGCAGACCCCACACCGGCCTCACCCACGGGTCGTCCTTCCCATACATGAGACAGATGGGTGTGTTGTTC	TGCAAACCCCAGACAGGCCTCACCCAAGGGTCATCCTTCCCGTACATGAGACAAATGGGTGTTTTGTTC	69	1671	KAG6402814.1	Hypothetical protein	Uncharacterized protein
2282	KAG6416155.1	86.957	69	9	0	1	69	1740	1808	1.37e-16	85.1	KAG6416155.1	93	60	60	0	86.96	1	1	TGCAGACCCCACATTCAAGACATTTGAAGCTGCATATCCATTTGTTGTTCAGAAGCTTCTCGTCGACAA	TGCGGATCCTACATTTAAGACGTTTGAAGCTGCATATCCATATGTTTTTCAGAAGCTTCTTGTTGACAA	69	2463	KAG6416155.1	aarF domain-containing kinase	K08869
2284	KAG6402086.1	85.965	57	8	0	13	69	305	249	1.05e-11	68	KAG6402086.1	74	49	49	0	85.96	1	-1	CCCTCTTCAACCTCAACCTTCACTTCCTATTTCTTCAGTCCGGGAATGTCCACTTTG	CCATCTTCAACCTCAACCTTCACTTCCTCTTTCTTTAATCCGGGAACATCAACGTTG	69	534	KAG6402086.1	HSP20 family protein	K13993
2284	KAG6402089.1	85.965	57	8	0	13	69	242	186	1.05e-11	68	KAG6402089.1	74	49	49	0	85.96	1	-1	CCCTCTTCAACCTCAACCTTCACTTCCTATTTCTTCAGTCCGGGAATGTCCACTTTG	CCATCTTCAACCTCAACCTTAACTTCCTCTTTCTTCAATCCGGGAACATCAACCTTG	69	471	KAG6402089.1	HSP20 family protein	K13993
2284	KAG6402091.1	85.965	57	8	0	13	69	242	186	1.05e-11	68	KAG6402091.1	74	49	49	0	85.96	1	-1	CCCTCTTCAACCTCAACCTTCACTTCCTATTTCTTCAGTCCGGGAATGTCCACTTTG	CCATCTTCAACCTCAACCTTAACTTCCTCTTTCTTCAATCCGGGAACATCAACCTTG	69	471	KAG6402091.1	HSP20 family protein	K13993
2286	KAG6429642.1	84.848	66	10	0	4	69	503	568	7.08e-14	75.2	KAG6429642.1	82	56	56	0	84.85	1	1	AGACCCTCATGTTGGCTTTGCTTGTAACGAGTGGCTCGTTCATCTTCTTCAGACGAAAGCGTGCTG	AGGCCCTTATGTTGGCTTTGCTCGTAAGCAGTGGCTCATTCATTTACTTCAGGCGGAAGCGTGCTG	69	618	KAG6429642.1	Hypothetical protein	Uncharacterized protein
2286	KAG6426338.1	83.333	66	11	0	4	69	503	568	3.01e-12	70.7	KAG6426338.1	77	55	55	0	83.33	1	1	AGACCCTCATGTTGGCTTTGCTTGTAACGAGTGGCTCGTTCATCTTCTTCAGACGAAAGCGTGCTG	AGGCCCTTATGTTGGCTTTGCTCGTAAGCAGTGGCTCATTCATTTACTTCAGGCGGAAACGTGCTG	69	618	KAG6426338.1	Hypothetical protein	Uncharacterized protein
2286	KAG6382221.1	84.127	63	10	0	7	69	350	412	3.01e-12	69.8	KAG6382221.1	76	53	53	0	84.13	1	1	CCCTCATGTTGGCTTTGCTTGTAACGAGTGGCTCGTTCATCTTCTTCAGACGAAAGCGTGCTG	CCCTTATGTTGGCTTTGCTCGTAAGCAGTGGCTCATTCATTTACTTCAGGCGGAAACGTGCTG	69	462	KAG6382221.1	Hypothetical protein	Uncharacterized protein
2288	KAG6389454.1	91.489	47	4	0	23	69	78	32	1.05e-11	68	KAG6389454.1	74	43	43	0	91.49	1	-1	CTTACTCGAAGAAATAGCTGGATTGTAGAAGCTTCCGTCATCCCTTT	CTTCCTCGAAGAAATAGCTGGATTGTAGAAGCTCCCGTCTTCCTTTT	69	735	KAG6389454.1	Hypothetical protein	Uncharacterized protein
2291	KAG6391369.1	85.507	69	10	0	1	69	50	118	1.67e-15	80.6	KAG6391369.1	88	59	59	0	85.51	1	1	TGCAGACCCTGCAACTAAGGGAGAAATGGATGAAGAGTTCAAAGTTGGATGAACTTTGGGAGAAGACTC	TGCAGGCCCTGCAAGTGAGAGAGAAATGGACAAAGAGTTCAAAGAAGGATGAGCTTTGGGAGAAGGCTC	69	2853	KAG6391369.1	aarF domain-containing kinase	K08869
2291	KAG6389562.1	84.058	69	11	0	1	69	14	82	7.08e-14	76.1	KAG6389562.1	83	58	58	0	84.06	1	1	TGCAGACCCTGCAACTAAGGGAGAAATGGATGAAGAGTTCAAAGTTGGATGAACTTTGGGAGAAGACTC	TGCAGGCCCTGCAAGTGAGAGAGCAATGGACAAAGAGTTCAAAGAAGGATGAGCTTTGGGAGAAGGCTC	69	297	KAG6389562.1	Hypothetical protein	Uncharacterized protein
2291	KAG6389614.1	84.848	66	10	0	4	69	179	244	7.08e-14	75.2	KAG6389614.1	82	56	56	0	84.85	1	1	AGACCCTGCAACTAAGGGAGAAATGGATGAAGAGTTCAAAGTTGGATGAACTTTGGGAGAAGACTC	AGGCCCTGCAAGTGAGAGAGAAATGGACAAAGAGTTCAAAGAGGGATGAGCTTTGGGAGAAGGCTC	69	3015	KAG6389614.1	aarF domain-containing kinase	K08869
2292	KAG6406033.1	85.507	69	10	0	1	69	924	992	1.67e-15	80.6	KAG6406033.1	88	59	59	0	85.51	1	1	TGCAGACCCTGCTGTCTTGAGGAAGAGAATTGCAGAGGAGTGGGCTCCGGCTTGGAGGAACATGACGTA	TGCAGATCCTGATCTCATGAGGAGGAGGATCGCGGAGGAGTGGGCGCCGGCTTGGAGGAACATGACTTA	69	2223	KAG6406033.1	aminoacylase [EC:3.5.1.14]	K14677
2292	KAG6408340.1	85.507	69	10	0	1	69	600	668	1.67e-15	80.6	KAG6408340.1	88	59	59	0	85.51	1	1	TGCAGACCCTGCTGTCTTGAGGAAGAGAATTGCAGAGGAGTGGGCTCCGGCTTGGAGGAACATGACGTA	TGCAGATCCTGATCTCATGAGGAGGAGGATCGCGGAGGAGTGGGCGCCGGCTTGGAGGAACATGACTTA	69	1062	KAG6408340.1	Hypothetical protein	Uncharacterized protein
2300	KAG6386675.1	86.957	69	9	0	1	69	269	201	1.37e-16	85.1	KAG6386675.1	93	60	60	0	86.96	1	-1	TGCAGACCGAGCTCCTGCGCGAGCTTGACTTTCCTCTCCGGTTCAAGCTTGTTCTCAACCTCGAAATTC	TGCAGCCCTAGCTCCTGCGCCAGCTTCACCTTCCTCTCCGGCTCCAGCTTATTCTCCACCTCGAAATTC	69	771	KAG6386675.1	homeobox-leucine zipper protein	K09338
2300	KAG6384867.1	85.507	69	10	0	1	69	248	180	1.67e-15	80.6	KAG6384867.1	88	59	59	0	85.51	1	-1	TGCAGACCGAGCTCCTGCGCGAGCTTGACTTTCCTCTCCGGTTCAAGCTTGTTCTCAACCTCGAAATTC	TGCAGCCCTAGCTCCTGCGCCAGCTTCACCTTCGTCTCCGGCTCCAGCTTATTCTCCACCTCGAAATTC	69	756	KAG6384867.1	homeobox-leucine zipper protein	K09338
2300	KAG6394493.1	85.507	69	10	0	1	69	245	177	1.67e-15	80.6	KAG6394493.1	88	59	59	0	85.51	1	-1	TGCAGACCGAGCTCCTGCGCGAGCTTGACTTTCCTCTCCGGTTCAAGCTTGTTCTCAACCTCGAAATTC	TGCAAGCCGAGCTCCTGAGCCAGCTTGACTTTCCTTTCCGGCTCGAGTTTGTTATCCACCTCGAAATTC	69	828	KAG6394493.1	homeobox-leucine zipper protein	K09338
2302	KAG6422880.1	91.045	67	6	0	3	69	580	646	7.56e-20	95.1	KAG6422880.1	104	61	61	0	91.04	1	1	CAGACCGATACAGCTTCTGTCCTTCTAGAGGCAATGGAGTACATAAGGTTCCTTCATGAACAGGTTA	CAGACTGATACAGCTTCGGTCCTCTTAGAAGCAATGGAGTACATAAGGTTTCTTCATGAACAGGTTA	69	3189	KAG6422880.1	acyl-[acyl-carrier-protein] desaturase [EC:1.14.19.2 1.14.19.11 1.14.19.26]	K03921
2302	KAG6419891.1	89.394	66	7	0	4	69	293	358	1.12e-17	88.7	KAG6419891.1	97	59	59	0	89.39	1	1	AGACCGATACAGCTTCTGTCCTTCTAGAGGCAATGGAGTACATAAGGTTCCTTCATGAACAGGTTA	AGACTGATACTGCTTCGGTCCTCTTAGAAGCAATGGAGTACATAAGGTTTCTTCATGAACAGGTTA	69	537	KAG6419891.1	Hypothetical protein	Uncharacterized protein
2302	KAG6395471.1	82.812	64	11	0	4	67	191	254	3.67e-11	67.1	KAG6395471.1	73	53	53	0	82.81	1	1	AGACCGATACAGCTTCTGTCCTTCTAGAGGCAATGGAGTACATAAGGTTCCTTCATGAACAGGT	AGACTGATACAGCCTCAGTACTTCTTGAGGCAATGGAGTACATAAGCTTCTTGCACGAGCAAGT	69	921	KAG6395471.1	Hypothetical protein	Uncharacterized protein
2304	KAG6432050.1	95.588	68	3	0	2	69	833	766	3.43e-24	110	KAG6432050.1	121	65	65	0	95.59	1	-1	GCAGACCGCACACTCATGTTTTTCTCCTCATTGCGAATTTCCACCTCTTTCCTAGCAACATGGAGTTC	GCGGACCGCACACTCATGTTTTTCTCCTCATTGCGAATTTCCACCTCTTTCCTAGCGATATGGAGTTC	69	3285	KAG6432050.1	Hypothetical protein	Uncharacterized protein
2304	KAG6390669.1	94.118	68	4	0	2	69	836	769	4.18e-23	105	KAG6390669.1	116	64	64	0	94.12	1	-1	GCAGACCGCACACTCATGTTTTTCTCCTCATTGCGAATTTCCACCTCTTTCCTAGCAACATGGAGTTC	GCGGACCGCACACTCATGTTTTTCTCTTCATTGCGAATTTCCGCCTCTTTCCTAGCAATATGGAGTTC	69	3351	KAG6390669.1	Hypothetical protein	Uncharacterized protein
2304	KAG6435350.1	94.118	68	4	0	2	69	833	766	4.18e-23	105	KAG6435350.1	116	64	64	0	94.12	1	-1	GCAGACCGCACACTCATGTTTTTCTCCTCATTGCGAATTTCCACCTCTTTCCTAGCAACATGGAGTTC	GCGGACCGCACACTCATGTTTTTCTCCTCATTGCGAATTTCCACCTCTTTCCTAGCGATATGCAGTTC	69	3285	KAG6435350.1	Hypothetical protein	Uncharacterized protein
2305	KAG6393743.1	86.957	69	9	0	1	69	646	578	1.37e-16	85.1	KAG6393743.1	93	60	60	0	86.96	1	-1	TGCAGACCGGACATGTCCCTTGGCGGGTGAGCCATTCATCTATACAATGCATGTGGAAGAGATGTCTAC	TGCAAACCGGGCAGGTTGCTTGTCGGATGAGCCATTCATCTATACAATGCATGTGGAAGAAATGCCTAC	69	660	KAG6393743.1	Hypothetical protein	Uncharacterized protein
2305	KAG6392028.1	85.507	69	10	0	1	69	646	578	1.67e-15	80.6	KAG6392028.1	88	59	59	0	85.51	1	-1	TGCAGACCGGACATGTCCCTTGGCGGGTGAGCCATTCATCTATACAATGCATGTGGAAGAGATGTCTAC	TGCAAACCGGGCAAGTTGCTTGTCGGATGAGCCATTCATCTATACAATGTATGTGGAAGAAATGCCTAC	69	660	KAG6392028.1	Hypothetical protein	Uncharacterized protein
2307	KAG6402207.1	90.909	66	6	0	1	66	385	320	2.64e-19	93.3	KAG6402207.1	102	60	60	0	90.91	1	-1	TGCAGACCGGGCACGTGGAGTGCTGCTGTAGCCACATGTCGATGCAAGGTGCGTGGAAAGAGTGTC	TGCACACCGGGCACGTGGAGTGCTGCTGCAGCCATATGTCGATGCACGCTGCGTGGAAGGAGTGTC	69	648	KAG6402207.1	Hypothetical protein	Uncharacterized protein
2307	KAG6404563.1	90.625	64	6	0	1	64	385	322	3.22e-18	89.7	KAG6404563.1	98	58	58	0	90.62	1	-1	TGCAGACCGGGCACGTGGAGTGCTGCTGTAGCCACATGTCGATGCAAGGTGCGTGGAAAGAGTG	TGCACACCGGGCACGTGGAGTGCTGCTGCAGCCATATGTCGATGCACGCTGCGTGGAAGGAGTG	69	651	KAG6404563.1	Hypothetical protein	Uncharacterized protein
2314	KAG6405656.1	95.312	64	3	0	6	69	359	422	5.1e-22	103	KAG6405656.1	113	61	61	0	95.31	1	1	ACCGTGGGTACTATTCAGTGGAGACAGTCACACTCTTAGTGGCCTTGAAAGTTCGTTATAGAGA	ACCGTGGGTACTATTCTGTGGAGACGGTCACACTCTTAGTAGCCTTGAAAGTTCGTTATAGAGA	69	1026	KAG6405656.1	serine/threonine-protein phosphatase 2A catalytic subunit [EC:3.1.3.16]	K04382
2314	KAG6407864.1	95.312	64	3	0	6	69	353	416	5.1e-22	103	KAG6407864.1	113	61	61	0	95.31	1	1	ACCGTGGGTACTATTCAGTGGAGACAGTCACACTCTTAGTGGCCTTGAAAGTTCGTTATAGAGA	ACCGTGGGTACTATTCTGTGGAGACGGTCACACTCTTAGTAGCCTTGAAAGTTCGTTATAGAGA	69	813	KAG6407864.1	Hypothetical protein	Uncharacterized protein
2314	KAG6398823.1	93.846	65	4	0	5	69	253	317	1.78e-21	100	KAG6398823.1	110	61	61	0	93.85	1	1	GACCGTGGGTACTATTCAGTGGAGACAGTCACACTCTTAGTGGCCTTGAAAGTTCGTTATAGAGA	GACCGTGGGTACTATTCGGTGGAGACGGTCACACTTTTAGTGGCCTTGAAAGTTCGCTATAGAGA	69	921	KAG6398823.1	serine/threonine-protein phosphatase 2A catalytic subunit [EC:3.1.3.16]	K04382
2315	KAG6398823.1	93.846	65	4	0	5	69	253	317	1.78e-21	100	KAG6398823.1	110	61	61	0	93.85	1	1	GACCGTGGGTACTATTCGTTGGAGACAGTCACACTCTTAGTGGCCTTGAAAGTTCGTTATAGAGA	GACCGTGGGTACTATTCGGTGGAGACGGTCACACTTTTAGTGGCCTTGAAAGTTCGCTATAGAGA	69	921	KAG6398823.1	serine/threonine-protein phosphatase 2A catalytic subunit [EC:3.1.3.16]	K04382
2315	KAG6405656.1	93.75	64	4	0	6	69	359	422	6.21e-21	98.7	KAG6405656.1	108	60	60	0	93.75	1	1	ACCGTGGGTACTATTCGTTGGAGACAGTCACACTCTTAGTGGCCTTGAAAGTTCGTTATAGAGA	ACCGTGGGTACTATTCTGTGGAGACGGTCACACTCTTAGTAGCCTTGAAAGTTCGTTATAGAGA	69	1026	KAG6405656.1	serine/threonine-protein phosphatase 2A catalytic subunit [EC:3.1.3.16]	K04382
2315	KAG6407864.1	93.75	64	4	0	6	69	353	416	6.21e-21	98.7	KAG6407864.1	108	60	60	0	93.75	1	1	ACCGTGGGTACTATTCGTTGGAGACAGTCACACTCTTAGTGGCCTTGAAAGTTCGTTATAGAGA	ACCGTGGGTACTATTCTGTGGAGACGGTCACACTCTTAGTAGCCTTGAAAGTTCGTTATAGAGA	69	813	KAG6407864.1	Hypothetical protein	Uncharacterized protein
2316	KAG6384556.1	91.837	49	4	0	6	54	2595	2643	8.63e-13	71.6	KAG6384556.1	78	45	45	0	91.84	1	1	ACCGTGGTCGTACCATAATGGTGGATCCTGGCCTACACTTCTGTGGCAG	ACCTTGGTCGTATCATAACGGTGGATCCTGGCCAACACTTCTGTGGCAG	69	2970	KAG6384556.1	Hypothetical protein	Uncharacterized protein
2316	KAG6406300.1	91.837	49	4	0	6	54	1557	1605	8.63e-13	71.6	KAG6406300.1	78	45	45	0	91.84	1	1	ACCGTGGTCGTACCATAATGGTGGATCCTGGCCTACACTTCTGTGGCAG	ACCTTGGTCGTATCATAACGGTGGATCCTGGCCAACACTTCTGTGGCAG	69	1932	KAG6406300.1	Hypothetical protein	Uncharacterized protein
2316	KAG6408608.1	91.837	49	4	0	6	54	1587	1635	8.63e-13	71.6	KAG6408608.1	78	45	45	0	91.84	1	1	ACCGTGGTCGTACCATAATGGTGGATCCTGGCCTACACTTCTGTGGCAG	ACCTTGGTCGTATCATAACGGTGGATCCTGGCCAACACTTCTGTGGCAG	69	1962	KAG6408608.1	Hypothetical protein	Uncharacterized protein
2325	KAG6391817.1	90.196	51	5	0	5	55	532	582	3.01e-12	70.7	KAG6391817.1	77	46	46	0	90.2	1	1	GACCTATTCAAAGCGTATAACGATGGCATCATTGATTCATTGGATCCTTTG	GACCTTTTTAAAGCATATAACGACAGCATCATTGATTCATTGGATCCTTTG	69	1581	KAG6391817.1	Hypothetical protein	Uncharacterized protein
2325	KAG6390058.1	88.235	51	6	0	5	55	460	510	3.67e-11	66.2	KAG6390058.1	72	45	45	0	88.24	1	1	GACCTATTCAAAGCGTATAACGATGGCATCATTGATTCATTGGATCCTTTG	GACCTTTTTAAAGCATATAAGGACAGCATCATTGATTCATTGGATCCTTTG	69	1611	KAG6390058.1	Hypothetical protein	Uncharacterized protein
2333	KAG6417680.1	89.855	69	7	0	1	69	1086	1154	2.64e-19	94.2	KAG6417680.1	103	62	62	0	89.86	1	1	TGCAGACCTTATGAGGGCTCTGAACAACCGGTTAGTGGCTTTGTCAATTCACATCAGGGAGTACTACTG	TGCAGACCTCACGATGGCACTGAACAACCGGTTAGTTGCTTTATCAATTCACATCCGGGAGTACTACTG	69	1893	KAG6417680.1	Hypothetical protein	Uncharacterized protein
2334	KAG6411419.1	84.058	69	11	0	1	69	1250	1318	7.08e-14	76.1	KAG6411419.1	83	58	58	0	84.06	1	1	TGCAGACCTTCAACTGTGACGGCTATAAGATTAGAGAAGACAACGGTTGCGTCGTCATTTGCTGGCAAG	TGCAGAGTTACAACTGTGATGGTTATAAGATCAAAGAGGACAACGGTTGCGTGGTGATCTGCTGGCAAG	69	1362	KAG6411419.1	Hypothetical protein	Uncharacterized protein
2334	KAG6414046.1	84.058	69	11	0	1	69	1259	1327	7.08e-14	76.1	KAG6414046.1	83	58	58	0	84.06	1	1	TGCAGACCTTCAACTGTGACGGCTATAAGATTAGAGAAGACAACGGTTGCGTCGTCATTTGCTGGCAAG	TGCAGAGTTATAACTGTGATGGTTATAAGATCAAAGAGGACAACGGTTGCGTGGTGATTTGCTGGCAAG	69	1371	KAG6414046.1	Hypothetical protein	Uncharacterized protein
2338	KAG6402173.1	92.424	66	5	0	4	69	2123	2058	2.17e-20	97.8	KAG6402173.1	107	61	61	0	92.42	1	-1	AGACCTTGGAGCTTCACTTCATACTCAATAAGAACTTGTCCATCTAAACATGTGGCAGAAGCTGGC	AGACCTTGGAGCTTCACTTGATATTCAACAAGAACTTGGCCATCTAAACATGTGGCAGAACCTGGC	69	2802	KAG6402173.1	Hypothetical protein	Uncharacterized protein
2338	KAG6404494.1	92.424	66	5	0	4	69	2123	2058	2.17e-20	97.8	KAG6404494.1	107	61	61	0	92.42	1	-1	AGACCTTGGAGCTTCACTTCATACTCAATAAGAACTTGTCCATCTAAACATGTGGCAGAAGCTGGC	AGACCTTGGAGCTTCACTTCATATTCAACAAGAACTTGGCCATCTAAACATGTGGCGGAACCTGGC	69	2802	KAG6404494.1	Hypothetical protein	Uncharacterized protein
2343	KAG6433938.1	91.176	68	6	0	1	68	1874	1807	2.17e-20	96.9	KAG6433938.1	106	62	62	0	91.18	1	-1	TGCAGACGAAAGTCAAAACCAACACCACCGTCTTCAAGAGGAATACAAAAGGTTGGCATTCCACTGAC	TGCAGACGATAGTCAAATCCAATACCTCCATCTTCAAGAGGAATACAAAAGGCTGGCATTCCACTGAC	69	2772	KAG6433938.1	1,4-alpha-glucan branching enzyme [EC:2.4.1.18]	K00700
2343	KAG6437262.1	91.176	68	6	0	1	68	1838	1771	2.17e-20	96.9	KAG6437262.1	106	62	62	0	91.18	1	-1	TGCAGACGAAAGTCAAAACCAACACCACCGTCTTCAAGAGGAATACAAAAGGTTGGCATTCCACTGAC	TGCAGACGATAGTCAAATCCAATACCTCCATCTTCAAGAGGAATACAAAAGGCTGGCATTCCACTGAC	69	2754	KAG6437262.1	1,4-alpha-glucan branching enzyme [EC:2.4.1.18]	K00700
2343	KAG6430563.1	85.507	69	10	0	1	69	667	599	1.67e-15	80.6	KAG6430563.1	88	59	59	0	85.51	1	-1	TGCAGACGAAAGTCAAAACCAACACCACCGTCTTCAAGAGGAATACAAAAGGTTGGCATTCCACTGACC	TGTAGACGATAGTCAAATCCAATACCTCCATCTTTGAGCGGAATACAAAAGGCTGGCATTCCACTGACC	69	1113	KAG6430563.1	Hypothetical protein	Uncharacterized protein
2345	KAG6399933.1	88.235	68	8	0	2	69	2132	2065	1.12e-17	87.8	KAG6399933.1	96	60	60	0	88.24	1	-1	GCAGACGAACAGCTTGCACACGCGGTGTCGCGTAGCTTAGCCACCCATTTTGCAGCTTCCCAAACACC	GCAGACGAGCAGCTCGGACATGTCGTGTCGCGCACCTTAGCCACCCATTTTGCAGCTTCCCAAACACC	69	2256	KAG6399933.1	Hypothetical protein	Uncharacterized protein
2346	KAG6399933.1	86.765	68	9	0	2	69	2132	2065	4.77e-16	83.3	KAG6399933.1	91	59	59	0	86.76	1	-1	GCAGACGAACAGCTTGCGCACGCGGTGTCGCGTAGCTTAGCCACCCATTTTGCAGCTTCCCAAACACC	GCAGACGAGCAGCTCGGACATGTCGTGTCGCGCACCTTAGCCACCCATTTTGCAGCTTCCCAAACACC	69	2256	KAG6399933.1	Hypothetical protein	Uncharacterized protein
2351	KAG6432888.1	91.837	49	4	0	1	49	681	633	8.63e-13	71.6	KAG6432888.1	78	45	45	0	91.84	1	-1	TGCAGACGAAGGGTTCAGCAGAGCTGCACATGCTCCATGGCGATGCCTT	TGCAGAAGAAGGGTTCAGAAGAGCCGCACATGCTCCATGGCGATACCTT	69	1266	KAG6432888.1	Hypothetical protein	Uncharacterized protein
2351	KAG6436205.1	89.796	49	5	0	1	49	756	708	3.67e-11	67.1	KAG6436205.1	73	44	44	0	89.8	1	-1	TGCAGACGAAGGGTTCAGCAGAGCTGCACATGCTCCATGGCGATGCCTT	TGCTGAGGAAGGGTTCAGAAGAGCCGCACATGCTCCATGGCGATACCTT	69	1341	KAG6436205.1	Hypothetical protein	Uncharacterized protein
2358	KAG6411324.1	92.537	67	5	0	3	69	1648	1582	6.21e-21	99.6	KAG6411324.1	109	62	62	0	92.54	1	-1	CAGACGACATGATGGAAGCAAAAAGTTCGCATTGCCTTTGTAGATTGGAAAGCCACTTCTGTGCACC	CAGACGACATGATGGAAGCAAAAAGTTCGCATTGCCTATGCAGATTGGACAGCCACTTTTGAGCACC	69	2376	KAG6411324.1	homeobox-leucine zipper protein	K09338
2358	KAG6413946.1	92.537	67	5	0	3	69	1621	1555	6.21e-21	99.6	KAG6413946.1	109	62	62	0	92.54	1	-1	CAGACGACATGATGGAAGCAAAAAGTTCGCATTGCCTTTGTAGATTGGAAAGCCACTTCTGTGCACC	CAGACGACATGATGGAAGCAAAAAGTTCGCATTGCCTATGCAGATTGGACAGCCACTTTTGGGCACC	69	2349	KAG6413946.1	homeobox-leucine zipper protein	K09338
2363	KAG6433886.1	86.957	69	9	0	1	69	774	706	1.37e-16	85.1	KAG6433886.1	93	60	60	0	86.96	1	-1	TGCAGACGAGAAGGTGATGAATCCATAGCCTCGAGACCTACCAGAGTCCCTATCGTAGACGACCTTGGC	TGCAGAGGAGAAAGTAATGAATCCAAAGCCACGTGACCTTCCAGAGTCCCTATCGTAGATGATCTTGGC	69	933	KAG6433886.1	nucleolin	K11294
2363	KAG6437201.1	86.957	69	9	0	1	69	768	700	1.37e-16	85.1	KAG6437201.1	93	60	60	0	86.96	1	-1	TGCAGACGAGAAGGTGATGAATCCATAGCCTCGAGACCTACCAGAGTCCCTATCGTAGACGACCTTGGC	TGCAGAGGAGAAAGTAATGAATCCAAAGCCTCGTGACCTTCCAGAGTCCCTATCATAGATGATCTTGGC	69	927	KAG6437201.1	nucleolin	K11294
2364	KAG6433886.1	86.957	69	9	0	1	69	774	706	1.37e-16	85.1	KAG6433886.1	93	60	60	0	86.96	1	-1	TGCAGACGAGAAGGTGATGAATCCATAGCCTCGAGACCTACCAGAGTCCCTATCGTAGACGACCTTGGC	TGCAGAGGAGAAAGTAATGAATCCAAAGCCACGTGACCTTCCAGAGTCCCTATCGTAGATGATCTTGGC	69	933	KAG6433886.1	nucleolin	K11294
2364	KAG6437201.1	86.957	69	9	0	1	69	768	700	1.37e-16	85.1	KAG6437201.1	93	60	60	0	86.96	1	-1	TGCAGACGAGAAGGTGATGAATCCATAGCCTCGAGACCTACCAGAGTCCCTATCGTAGACGACCTTGGC	TGCAGAGGAGAAAGTAATGAATCCAAAGCCTCGTGACCTTCCAGAGTCCCTATCATAGATGATCTTGGC	69	927	KAG6437201.1	nucleolin	K11294
2365	KAG6403233.1	90.566	53	5	0	15	67	890	838	2.47e-13	74.3	KAG6403233.1	81	48	48	0	90.57	1	-1	GGACATGTGAACTCCAAGGAGATAGATCTGAGTTCCCTGAAGTTCACAAGGAA	GGACATGTGAAGTCCAACGAAATAGATCTGAGTTCCCTGAAGTTCCGAAGGAA	69	1491	KAG6403233.1	Hypothetical protein	Uncharacterized protein
2365	KAG6423651.1	90.566	53	5	0	15	67	596	544	2.47e-13	74.3	KAG6423651.1	81	48	48	0	90.57	1	-1	GGACATGTGAACTCCAAGGAGATAGATCTGAGTTCCCTGAAGTTCACAAGGAA	GGACATGTGAAGTCCAACGAAATAGATCTGAGTTCCCTGAAGTTCTGAAGGAA	69	963	KAG6423651.1	Hypothetical protein	Uncharacterized protein
2365	KAG6433624.1	88.679	53	6	0	15	67	338	286	3.01e-12	69.8	KAG6433624.1	76	47	47	0	88.68	1	-1	GGACATGTGAACTCCAAGGAGATAGATCTGAGTTCCCTGAAGTTCACAAGGAA	GGACATGTGAAGTCCAACGAAATAGATCTGAGTTCCCTGAAGTTTCGAAGGAA	69	663	KAG6433624.1	Hypothetical protein	Uncharacterized protein
2366	KAG6429049.1	92.982	57	4	0	5	61	1399	1343	3.92e-17	86	KAG6429049.1	94	53	53	0	92.98	1	-1	GACGAGAGCATTCACCATCAAGTTCATTTCCATCCTTGTCCACGGAATCATCATCCT	GACGAGAACATTCACCATCAAGTTCATTTCCATCCTTGTCCACAAAATCGTCATCCT	69	3687	KAG6429049.1	Hypothetical protein	Uncharacterized protein
2366	KAG6427007.1	91.228	57	5	0	5	61	1336	1280	1.67e-15	81.5	KAG6427007.1	89	52	52	0	91.23	1	-1	GACGAGAGCATTCACCATCAAGTTCATTTCCATCCTTGTCCACGGAATCATCATCCT	GACGAGAACATTCACCATCAAGTTCATTCCCATCCTTGTCCACAAAATCGTCATCCT	69	3747	KAG6427007.1	Hypothetical protein	Uncharacterized protein
2366	KAG6397242.1	89.474	57	6	0	5	61	1459	1403	2.03e-14	77	KAG6397242.1	84	51	51	0	89.47	1	-1	GACGAGAGCATTCACCATCAAGTTCATTTCCATCCTTGTCCACGGAATCATCATCCT	GACGAGAGCACTCATCATCAAGCTCATTTCCATCCTTATCCATGGAGTCATCATCCT	69	3750	KAG6397242.1	Hypothetical protein	Uncharacterized protein
2372	KAG6434105.1	87.302	63	8	0	1	63	1014	1076	5.82e-15	78.8	KAG6434105.1	86	55	55	0	87.3	1	1	TGCAGACGATGACTATGATCCAGATAGAGTTGAGTGCAGTAGCAGTGACAATATGTCTAGGTC	TGCAGATGATGACTATGATCCAGATAGAAATGAGTGTAGCTGCAGTGGCAATATGTCTATGTC	69	2064	KAG6434105.1	Hypothetical protein	Uncharacterized protein
2372	KAG6427353.1	86.441	59	8	0	1	59	1185	1243	8.63e-13	71.6	KAG6427353.1	78	51	51	0	86.44	1	1	TGCAGACGATGACTATGATCCAGATAGAGTTGAGTGCAGTAGCAGTGACAATATGTCTA	TGAAGATGATGACTATGATCCAGATAGAAATGAACGCAGTTGCAGTGGCAATATGTCTA	69	2319	KAG6427353.1	Hypothetical protein	Uncharacterized protein
2372	KAG6430414.1	84.746	59	9	0	1	59	1002	1060	3.67e-11	67.1	KAG6430414.1	73	50	50	0	84.75	1	1	TGCAGACGATGACTATGATCCAGATAGAGTTGAGTGCAGTAGCAGTGACAATATGTCTA	TGAAGATGATGACTATGATCCAGATAGAAATGAATGCAGTTGTAGTGGCAATACGTCTA	69	2136	KAG6430414.1	Hypothetical protein	Uncharacterized protein
2382	KAG6406601.1	88.889	54	6	0	10	63	300	247	8.63e-13	71.6	KAG6406601.1	78	48	48	0	88.89	1	-1	AGTTGGTGAAGCACTAGCAGAACTTTCTTCTGATTGAGGAGATTTTGGAGACAA	AGTTGGTGAAGCAGCGCCAGAACTTTCTTCTGATTGAGGAGACTTGGGAGACAA	69	1797	KAG6406601.1	phosphatidylinositol-3,4,5-trisphosphate 3-phosphatase and dual-specificity protein phosphatase PTEN [EC:3.1.3.16 3.1.3.48 3.1.3.67]	K01110
2382	KAG6424938.1	88.889	54	6	0	10	63	303	250	8.63e-13	71.6	KAG6424938.1	78	48	48	0	88.89	1	-1	AGTTGGTGAAGCACTAGCAGAACTTTCTTCTGATTGAGGAGATTTTGGAGACAA	AGTTGGTGAAGAAGCAGCAGAACTTTCTTCTGATTGGGGAGACTTGGGAGACAA	69	1818	KAG6424938.1	phosphatidylinositol-3,4,5-trisphosphate 3-phosphatase and dual-specificity protein phosphatase PTEN [EC:3.1.3.16 3.1.3.48 3.1.3.67]	K01110
2382	KAG6421886.1	87.037	54	7	0	10	63	303	250	3.67e-11	67.1	KAG6421886.1	73	47	47	0	87.04	1	-1	AGTTGGTGAAGCACTAGCAGAACTTTCTTCTGATTGAGGAGATTTTGGAGACAA	AGTTGGTGAAGAAGCACCAGAACTTTCTTCTGATGGAGGAGACTTGGGAGACAA	69	2799	KAG6421886.1	phosphatidylinositol-3,4,5-trisphosphate 3-phosphatase and dual-specificity protein phosphatase PTEN [EC:3.1.3.16 3.1.3.48 3.1.3.67]	K01110
2386	KAG6434230.1	82.609	69	12	0	1	69	351	419	8.63e-13	71.6	KAG6434230.1	78	57	57	0	82.61	1	1	TGCAGACGCCGACTTCAACCACTTCCTCCTCCGCCAAGATGGGAAGCTTGTAGACACCTGGTCGATGGA	TGCAGATCCCGAGTTCAACCACTTTCTCCTCCGGCAGGACGGGAAGCTGGCTGACACGTGGTCCATGGA	69	1506	KAG6434230.1	Hypothetical protein	Uncharacterized protein
2388	KAG6405082.1	84.058	69	11	0	1	69	941	1009	7.08e-14	76.1	KAG6405082.1	83	58	58	0	84.06	1	1	TGCAGACGCCTTGCCAGAACAGAGATCAGTACTTGTTCTGGGATGCGTTTCATCCGACTGAGGCGGCGA	TGCAGCCGTCGTGCCAGAACAGAGACGAGCACTTGTTTTGGGACGCGTTTCATCCGACCGAAGCTGCGA	69	1095	KAG6405082.1	Hypothetical protein	Uncharacterized protein
2388	KAG6416729.1	82.609	69	12	0	1	69	938	1006	8.63e-13	71.6	KAG6416729.1	78	57	57	0	82.61	1	1	TGCAGACGCCTTGCCAGAACAGAGATCAGTACTTGTTCTGGGATGCGTTTCATCCGACTGAGGCGGCGA	TGCAGCCTTCGTGCCAGAACAGAGACGAGTACTTGTTTTGGGACGCCTTTCATCCCACTGAAGCTGCGA	69	1092	KAG6416729.1	Hypothetical protein	Uncharacterized protein
2388	KAG6419285.1	82.609	69	12	0	1	69	938	1006	8.63e-13	71.6	KAG6419285.1	78	57	57	0	82.61	1	1	TGCAGACGCCTTGCCAGAACAGAGATCAGTACTTGTTCTGGGATGCGTTTCATCCGACTGAGGCGGCGA	TGCAGCCTTCGTGCCAGAACAGAGACGAGTACTTGTTTTGGGACGCGTTTCATCCCACGGAAGCTGCGA	69	1092	KAG6419285.1	Hypothetical protein	Uncharacterized protein
2391	KAG6422439.1	82.609	69	12	0	1	69	1622	1690	8.63e-13	71.6	KAG6422439.1	78	57	57	0	82.61	1	1	TGCAGACGCTCAACCCGGAGGGGCTGCTGGTGAACGGCAAGCCCAACAAAGCGCTGCTCAAGGATAGGT	TGCAGACGCTGAATCAGGATGGGCTGCTGGTGAACGGGAAGCCGAACAAGCAGCTGATAAAGGAGAGGT	69	1956	KAG6422439.1	exocyst complex component 7	K07195
2393	KAG6396535.1	92.537	67	5	0	1	67	251	317	6.21e-21	99.6	KAG6396535.1	109	62	62	0	92.54	1	1	TGCAGACGCTGCCGCCGCGCCTCGACAGCTCCGTCGAGTGGGAGCCGATAAGGGAAAACGGCGTCGT	TGCAGACGCTGCCCCCGCGCCTCGACAGCTCCGTCGAGTGGGAGCCGATCAGGGAGAGCGGCGCCGT	69	876	KAG6396535.1	Hypothetical protein	Uncharacterized protein
2393	KAG6398828.1	92.063	63	5	0	5	67	201	263	9.22e-19	92.4	KAG6398828.1	101	58	58	0	92.06	1	1	GACGCTGCCGCCGCGCCTCGACAGCTCCGTCGAGTGGGAGCCGATAAGGGAAAACGGCGTCGT	GACGCTGCCCCCGCGCCTCGACAGCTCCGTCGAGTGGGAGCCGATCAGGGAGAGCGGCGCCGT	69	822	KAG6398828.1	Hypothetical protein	Uncharacterized protein
2393	KAG6407895.1	90.476	63	6	0	1	63	899	961	1.12e-17	87.8	KAG6407895.1	96	57	57	0	90.48	1	1	TGCAGACGCTGCCGCCGCGCCTCGACAGCTCCGTCGAGTGGGAGCCGATAAGGGAAAACGGCG	TGCAGACGCTGCCGCCGCGCCTCGACAGCTCGGTCGAGTGGGAGCCCATCAGGGAGCGCGGCG	69	1557	KAG6407895.1	Hypothetical protein	Uncharacterized protein
2394	KAG6396535.1	92.537	67	5	0	1	67	251	317	6.21e-21	99.6	KAG6396535.1	109	62	62	0	92.54	1	1	TGCAGACGCTGCCGCCGCGCCTCGACAGCTCCGTCGAGTGGGAGCCGATAAGGGAAAACGGCGTCGT	TGCAGACGCTGCCCCCGCGCCTCGACAGCTCCGTCGAGTGGGAGCCGATCAGGGAGAGCGGCGCCGT	69	876	KAG6396535.1	Hypothetical protein	Uncharacterized protein
2394	KAG6398828.1	92.063	63	5	0	5	67	201	263	9.22e-19	92.4	KAG6398828.1	101	58	58	0	92.06	1	1	GACGCTGCCGCCGCGCCTCGACAGCTCCGTCGAGTGGGAGCCGATAAGGGAAAACGGCGTCGT	GACGCTGCCCCCGCGCCTCGACAGCTCCGTCGAGTGGGAGCCGATCAGGGAGAGCGGCGCCGT	69	822	KAG6398828.1	Hypothetical protein	Uncharacterized protein
2394	KAG6407895.1	90.476	63	6	0	1	63	899	961	1.12e-17	87.8	KAG6407895.1	96	57	57	0	90.48	1	1	TGCAGACGCTGCCGCCGCGCCTCGACAGCTCCGTCGAGTGGGAGCCGATAAGGGAAAACGGCG	TGCAGACGCTGCCGCCGCGCCTCGACAGCTCGGTCGAGTGGGAGCCCATCAGGGAGCGCGGCG	69	1557	KAG6407895.1	Hypothetical protein	Uncharacterized protein
2405	KAG6411856.1	86.957	69	9	0	1	69	530	598	1.37e-16	85.1	KAG6411856.1	93	60	60	0	86.96	1	1	TGCAGACGGCGGATGGGTGGGCGAAGTTCACCGGTGGGTTCTTCTTTGGTGGGATTTCTGGTGTGATTT	TGCAGACAGCCGACGGGTGGGCAAAGTTCACCGGTGGATTCTTCTTCGGTGGGATCTCCGGTGTGACTT	69	648	KAG6411856.1	photosystem I subunit XI	K02699
2405	KAG6386515.1	87.5	64	8	0	1	64	530	593	1.67e-15	80.6	KAG6386515.1	88	56	56	0	87.5	1	1	TGCAGACGGCGGATGGGTGGGCGAAGTTCACCGGTGGGTTCTTCTTTGGTGGGATTTCTGGTGT	TGCAGACAGCCGACGGGTGGGCAAAGTTCACCGGTGGATTCTTCTTCGGTGGGATCTCCGGTGT	69	648	KAG6386515.1	photosystem I subunit XI	K02699
2405	KAG6386517.1	87.5	64	8	0	1	64	530	593	1.67e-15	80.6	KAG6386517.1	88	56	56	0	87.5	1	1	TGCAGACGGCGGATGGGTGGGCGAAGTTCACCGGTGGGTTCTTCTTTGGTGGGATTTCTGGTGT	TGCAGACAGCTGACGGGTGGGCAAAGTTCACCGGTGGATTCTTCTTCGGTGGGATCTCCGGTGT	69	648	KAG6386517.1	photosystem I subunit XI	K02699
2406	KAG6396633.1	83.607	61	10	0	7	67	67	7	3.67e-11	66.2	KAG6396633.1	72	51	51	0	83.61	1	-1	CGGCGGCGTTGCCCCTCATCTCCTCACACGCGGCGAAGCTGTTGTGGTGAAACGCGTAGCG	CGGCGGCGTTGCCTCTCATCTCCTCGTAGGCAGCAAAGCTGTTCTGGTGGATTGCGTAGCG	69	549	KAG6396633.1	Hypothetical protein	Uncharacterized protein
2409	KAG6393147.1	85.075	67	10	0	3	69	1396	1462	2.03e-14	77	KAG6393147.1	84	57	57	0	85.07	1	1	CAGACGGGTCAACCTGATGATATTTCTGAACATCCACTCGACAATGTTGACCTCCTTCAGGACCAGC	CAGACAGGCTTACCTGACGATATTTCAGAGCATCCACTTGACAATGTTGACCTCCTTCAAGATCAGC	69	3333	KAG6393147.1	exportin-7	K18460
2409	KAG6394956.1	83.582	67	11	0	3	69	1387	1453	8.63e-13	72.5	KAG6394956.1	79	56	56	0	83.58	1	1	CAGACGGGTCAACCTGATGATATTTCTGAACATCCACTCGACAATGTTGACCTCCTTCAGGACCAGC	CAGACAGGCTTACCTGACGATATTTCAGAGCATCCACTTGACAACGTTGACCTCCTTCAAGATCAGC	69	3402	KAG6394956.1	exportin-7	K18460
2411	KAG6385900.1	89.091	55	6	0	15	69	1	55	2.47e-13	73.4	KAG6385900.1	80	49	49	0	89.09	1	1	ATGTATACTGCCGCCCAAAAAATTCACAAAGACAGGGATGCTGAGCCCTCTGAGT	ATGTATACTGCTTCGCAAAAGATTCACAAGGACAGGGATGCTGAGCCCACTGAGT	69	576	KAG6385900.1	small subunit ribosomal protein S7e	K02993
2411	KAG6385898.1	89.091	55	6	0	15	69	1	55	2.47e-13	73.4	KAG6385898.1	80	49	49	0	89.09	1	1	ATGTATACTGCCGCCCAAAAAATTCACAAAGACAGGGATGCTGAGCCCTCTGAGT	ATGTATACTGCTTCGCAAAAGATTCACAAGGACAGGGATGCTGAGCCCACTGAGT	69	576	KAG6385898.1	small subunit ribosomal protein S7e	K02993
2411	KAG6412449.1	87.273	55	7	0	15	69	1	55	1.05e-11	68.9	KAG6412449.1	75	48	48	0	87.27	1	1	ATGTATACTGCCGCCCAAAAAATTCACAAAGACAGGGATGCTGAGCCCTCTGAGT	ATGTATACTGCTTCGCAAAAGATTCACAAGGACTGGGATGCTGAGCCCACTGAGT	69	576	KAG6412449.1	small subunit ribosomal protein S7e	K02993
2412	KAG6387797.1	83.077	65	11	0	1	65	173	237	1.05e-11	68.9	KAG6387797.1	75	54	54	0	83.08	1	1	TGCAGACGGTCCTCATTCCCATTGTGTTCCCACTTATCATCAGCCAAACGGTGGCCGGCCCGCCG	TGCACACCGTCCTCATTCCCATTGTCTTCCCGCTTATTATTAGCCAGACGGTGTCGGATCCGCCG	69	1596	KAG6387797.1	Hypothetical protein	Uncharacterized protein
2413	KAG6415888.1	86.957	69	9	0	1	69	762	830	1.37e-16	85.1	KAG6415888.1	93	60	60	0	86.96	1	1	TGCAGACGGTGCTGGTCGGAGGCAAGCCGCCACAGACCAGTTCATGCTGGAGCGGTTCCGCAAACGAGA	TGCAGATGGTGCTGGTCGAAGGCAAGCTGCCACAGATGAGCTCATGTTGGACCGCTTCCGCAAACGAGA	69	855	KAG6415888.1	Hypothetical protein	Uncharacterized protein
2413	KAG6418404.1	86.957	69	9	0	1	69	732	800	1.37e-16	85.1	KAG6418404.1	93	60	60	0	86.96	1	1	TGCAGACGGTGCTGGTCGGAGGCAAGCCGCCACAGACCAGTTCATGCTGGAGCGGTTCCGCAAACGAGA	TGCAAATGGTGCTGGTCGAAGGCAAGCTGCCACAGATGAGCTCATGCTGGACCGCTTCCGCAAACGAGA	69	825	KAG6418404.1	Hypothetical protein	Uncharacterized protein
2414	KAG6415888.1	86.957	69	9	0	1	69	762	830	1.37e-16	85.1	KAG6415888.1	93	60	60	0	86.96	1	1	TGCAGACGGTGCTGGTCGGAGGCAAGCCGCCACAGACCAGTTCATGCTGGAGCGGTTCCGCAAACGAGA	TGCAGATGGTGCTGGTCGAAGGCAAGCTGCCACAGATGAGCTCATGTTGGACCGCTTCCGCAAACGAGA	69	855	KAG6415888.1	Hypothetical protein	Uncharacterized protein
2414	KAG6418404.1	86.957	69	9	0	1	69	732	800	1.37e-16	85.1	KAG6418404.1	93	60	60	0	86.96	1	1	TGCAGACGGTGCTGGTCGGAGGCAAGCCGCCACAGACCAGTTCATGCTGGAGCGGTTCCGCAAACGAGA	TGCAAATGGTGCTGGTCGAAGGCAAGCTGCCACAGATGAGCTCATGCTGGACCGCTTCCGCAAACGAGA	69	825	KAG6418404.1	Hypothetical protein	Uncharacterized protein
2415	KAG6389983.1	91.045	67	6	0	3	69	1430	1364	7.56e-20	95.1	KAG6389983.1	104	61	61	0	91.04	1	-1	CAGACGTACACATTTGGCTGGAATCCAGTTTTTATAGCTTGGGTATGGACTTGCTCTCCTAGATCAA	CAGACATACACATTTGGCTGAAATCCAGTTTTTATAGCCTGGGTATGAACTTGTTGTCCTAGATCAA	69	3501	KAG6389983.1	Hypothetical protein	Uncharacterized protein
2415	KAG6391741.1	89.552	67	7	0	3	69	1361	1295	3.22e-18	90.6	KAG6391741.1	99	60	60	0	89.55	1	-1	CAGACGTACACATTTGGCTGGAATCCAGTTTTTATAGCTTGGGTATGGACTTGCTCTCCTAGATCAA	CAGACATACACATTCGGCTGAAATCCAGTTTTTATAGCCTGGGTATGTACTTGTTGTCCTAGATCAA	69	3384	KAG6391741.1	Hypothetical protein	Uncharacterized protein
2416	KAG6398824.1	89.394	66	7	0	4	69	1852	1917	1.12e-17	88.7	KAG6398824.1	97	59	59	0	89.39	1	1	AGACGTACACCCACCATGATTTATGTCCGAGAATCACATGTTGAGAGGATGGGAAAGGTTCAGGAT	AGACGTACCCCCACAATGATTTATGTCCGGGAATCACACGTTGACAAGATGGGAAAGGTCCAGGAT	69	4005	KAG6398824.1	phospholipid-transporting ATPase [EC:7.6.2.1]	K14802
2416	KAG6396532.1	87.879	66	8	0	4	69	1771	1836	1.37e-16	84.2	KAG6396532.1	92	58	58	0	87.88	1	1	AGACGTACACCCACCATGATTTATGTCCGAGAATCACATGTTGAGAGGATGGGAAAGGTTCAGGAT	AGACGTACCCCCACAACGATTTATGTCCGGGAATCACACGTTGACAAGATGGGAAAGGTCCAGGAT	69	3915	KAG6396532.1	phospholipid-transporting ATPase [EC:7.6.2.1]	K14802
2416	KAG6405655.1	86.364	66	9	0	4	69	1627	1692	5.82e-15	79.7	KAG6405655.1	87	57	57	0	86.36	1	1	AGACGTACACCCACCATGATTTATGTCCGAGAATCACATGTTGAGAGGATGGGAAAGGTTCAGGAT	AGACGTACCCCCACTATGATTTTCATCCGGGAATCACATGCTGACAAGATGGGAAAGGTTCAGGAT	69	3615	KAG6405655.1	phospholipid-transporting ATPase [EC:7.6.2.1]	K14802
2418	KAG6396739.1	89.855	69	7	0	1	69	347	415	2.64e-19	94.2	KAG6396739.1	103	62	62	0	89.86	1	1	TGCAGACGTACCTTGATAATACACAGTGGGATCTGAGTGGCTTTGTCGATGCAATATTGGGTCAGCCGA	TGCAGACTTACCTTGATAACTTACAGTGGGATCTGAGTGGCTTTGTCGACTTAATATTGGGTCAGCCGA	69	1125	KAG6396739.1	protein BCP1	K15262
2418	KAG6399033.1	88.406	69	8	0	1	69	302	370	3.22e-18	89.7	KAG6399033.1	98	61	61	0	88.41	1	1	TGCAGACGTACCTTGATAATACACAGTGGGATCTGAGTGGCTTTGTCGATGCAATATTGGGTCAGCCGA	TGCAGACTTACCTTGATAACTTACAGTGGGATCTGAGTGGATTTGTCGACTTAATATTGGGTCAGCCGA	69	1089	KAG6399033.1	protein BCP1	K15262
2442	KAG6398682.1	88.406	69	8	0	1	69	1323	1391	3.22e-18	89.7	KAG6398682.1	98	61	61	0	88.41	1	1	TGCAGACTACATGATGTCTATATGTGGTGATGATGGTCTGAGAGAGCTTTCTTCTCCAGGAAAGAGTGG	TGCGGATTACATGATGTCCATATGCGGCGATGATGGTCTGAGAGAGCTTTCTTCCCCTGGAAAAAGTGG	69	2361	KAG6398682.1	1-phosphatidylinositol-4-phosphate 5-kinase [EC:2.7.1.68]	K00889
2442	KAG6396392.1	86.957	69	9	0	1	69	1329	1397	1.37e-16	85.1	KAG6396392.1	93	60	60	0	86.96	1	1	TGCAGACTACATGATGTCTATATGTGGTGATGATGGTCTGAGAGAGCTTTCTTCTCCAGGAAAGAGTGG	TGCGGATTACATGATGTCCATATGTGGCGATGATGGTTTAAGAGAGCTTTCTTCCCCGGGAAAAAGTGG	69	2367	KAG6396392.1	1-phosphatidylinositol-4-phosphate 5-kinase [EC:2.7.1.68]	K00889
2442	KAG6437302.1	84.058	69	11	0	1	69	1476	1544	7.08e-14	76.1	KAG6437302.1	83	58	58	0	84.06	1	1	TGCAGACTACATGATGTCTATATGTGGTGATGATGGTCTGAGAGAGCTTTCTTCTCCAGGAAAGAGTGG	TGCTGACTACATGATGTCAATCTGTGGAAATGATGCCCTAAGAGAACTTTCATCTCCGGGAAAGAGTGG	69	2649	KAG6437302.1	1-phosphatidylinositol-4-phosphate 5-kinase [EC:2.7.1.68]	K00889
2444	KAG6414844.1	86.441	59	8	0	11	69	1264	1206	8.63e-13	71.6	KAG6414844.1	78	51	51	0	86.44	1	-1	GACGATGCTGTTGAAGCAATAATGGATGATAAGCATTAGGCAGATACAAATTCCACTTC	GACGATGCTTCTGAAGCAATAACGGATGGTGAGCTTTAGGCAGATACAAAATCCACGTC	69	2568	KAG6414844.1	Hypothetical protein	Uncharacterized protein
2444	KAG6417353.1	86.441	59	8	0	11	69	1267	1209	8.63e-13	71.6	KAG6417353.1	78	51	51	0	86.44	1	-1	GACGATGCTGTTGAAGCAATAATGGATGATAAGCATTAGGCAGATACAAATTCCACTTC	GACGATGCTTCTGAAGCAATAACGGATGGTGAGCTTTAGGCAGATACAAAATCCACGTC	69	2679	KAG6417353.1	Hypothetical protein	Uncharacterized protein
2455	KAG6432713.1	84.615	65	10	0	5	69	390	454	2.47e-13	73.4	KAG6432713.1	80	55	55	0	84.62	1	1	GACTATGGTTGCTTTGATGGGTGCAAATTTCTCTAAACCATTGGTGGCAAACAAGGTTACTCATC	GAATATGGTTTCCCTGATGGGTGCCAATTTTTCAAAACCATTGATAGCTAACAAGGTTACTCATC	69	4359	KAG6432713.1	topoisomerase (DNA) II binding protein 1	K10728
2455	KAG6383497.1	83.077	65	11	0	5	69	399	463	1.05e-11	68.9	KAG6383497.1	75	54	54	0	83.08	1	1	GACTATGGTTGCTTTGATGGGTGCAAATTTCTCTAAACCATTGGTGGCAAACAAGGTTACTCATC	GAATATGGTTGCCTTGATGGGTGCCACTTTTACAAAGCCATTGCTGGCTACCAAGGTTACTCATC	69	3795	KAG6383497.1	topoisomerase (DNA) II binding protein 1	K10728
2455	KAG6417767.1	83.077	65	11	0	5	69	420	484	1.05e-11	68.9	KAG6417767.1	75	54	54	0	83.08	1	1	GACTATGGTTGCTTTGATGGGTGCAAATTTCTCTAAACCATTGGTGGCAAACAAGGTTACTCATC	GAATATGGTTGCCTTGATGGGTGCCACTTTTACAAAGCCATTGCTGGCTACCAAGGTTACTCATC	69	4017	KAG6417767.1	topoisomerase (DNA) II binding protein 1	K10728
2456	KAG6432713.1	84.615	65	10	0	5	69	390	454	2.47e-13	73.4	KAG6432713.1	80	55	55	0	84.62	1	1	GACTATGGTTGCTTTGATGGGTGCAAATTTCTCTAAACCATTGGTGGCAAACAAGGTTACTCATC	GAATATGGTTTCCCTGATGGGTGCCAATTTTTCAAAACCATTGATAGCTAACAAGGTTACTCATC	69	4359	KAG6432713.1	topoisomerase (DNA) II binding protein 1	K10728
2456	KAG6383497.1	83.077	65	11	0	5	69	399	463	1.05e-11	68.9	KAG6383497.1	75	54	54	0	83.08	1	1	GACTATGGTTGCTTTGATGGGTGCAAATTTCTCTAAACCATTGGTGGCAAACAAGGTTACTCATC	GAATATGGTTGCCTTGATGGGTGCCACTTTTACAAAGCCATTGCTGGCTACCAAGGTTACTCATC	69	3795	KAG6383497.1	topoisomerase (DNA) II binding protein 1	K10728
2456	KAG6417767.1	83.077	65	11	0	5	69	420	484	1.05e-11	68.9	KAG6417767.1	75	54	54	0	83.08	1	1	GACTATGGTTGCTTTGATGGGTGCAAATTTCTCTAAACCATTGGTGGCAAACAAGGTTACTCATC	GAATATGGTTGCCTTGATGGGTGCCACTTTTACAAAGCCATTGCTGGCTACCAAGGTTACTCATC	69	4017	KAG6417767.1	topoisomerase (DNA) II binding protein 1	K10728
2462	KAG6421038.1	89.394	66	7	0	3	68	757	692	1.12e-17	88.7	KAG6421038.1	97	59	59	0	89.39	1	-1	CAGACTCAGATGCCAAAAGAGCATTTGCAAAGGGACCAGAGTAGCCAGTTGAATGAATGGCCTCCA	CAGAGTCAGAAGCCAAGAGAGCATTTGCATAAGGACCGGAATAGCCAGTTGAATGAATGGCCTCCA	69	1569	KAG6421038.1	mitochondrial-processing peptidase subunit alpha [EC:3.4.24.64]	K01412
2462	KAG6424080.1	89.394	66	7	0	3	68	697	632	1.12e-17	88.7	KAG6424080.1	97	59	59	0	89.39	1	-1	CAGACTCAGATGCCAAAAGAGCATTTGCAAAGGGACCAGAGTAGCCAGTTGAATGAATGGCCTCCA	CAGATTCAGAAGCCAAGAGAGCATTTGCATAAGGACCGGAATAGCCAGTTGAATGAATGGCCTCCA	69	1566	KAG6424080.1	mitochondrial-processing peptidase subunit alpha [EC:3.4.24.64]	K01412
2462	KAG6411663.1	85.294	68	10	0	1	68	699	632	5.82e-15	78.8	KAG6411663.1	86	58	58	0	85.29	1	-1	TGCAGACTCAGATGCCAAAAGAGCATTTGCAAAGGGACCAGAGTAGCCAGTTGAATGAATGGCCTCCA	TGCAGCTTCGGAAGCCAAAAGACCATTTGCATAAGCACCAGAGTAACCAGTTGAATGAATAGCCTCCA	69	1470	KAG6411663.1	mitochondrial-processing peptidase subunit alpha [EC:3.4.24.64]	K01412
2463	KAG6431860.1	86.957	69	9	0	1	69	617	685	1.37e-16	85.1	KAG6431860.1	93	60	60	0	86.96	1	1	TGCAGACTCAGGGTAACGGGTCCCTGAAAGATAATATCATTACAGTGTTTGGCACAAGTACTTTTTCTT	TGAAGACACAGGGTAATGGGTCCCTAAAGGAGAATATCATTATGGTGTTTGGCACAAGTATTTTTTCTT	69	2796	KAG6431860.1	DNA mismatch repair protein PMS2	K10858
2472	KAG6407569.1	86.364	66	9	0	1	66	163	228	5.82e-15	79.7	KAG6407569.1	87	57	57	0	86.36	1	1	TGCAGACTCCGCTGGACTAACTATCTCCGCCCCGACATCAAACGCGGACACTTCTCGCCCGAAGAA	TGCAGACTCCGGTGGAGCAACTATCTCCGGCCCGACATCAAGCGTGGAAACTTCTCTCCCCAAGAA	69	843	KAG6407569.1	transcription factor MYB, plant	K09422
2472	KAG6396008.1	82.353	68	12	0	1	68	147	214	3.01e-12	69.8	KAG6396008.1	76	56	56	0	82.35	1	1	TGCAGACTCCGCTGGACTAACTATCTCCGCCCCGACATCAAACGCGGACACTTCTCGCCCGAAGAAGA	TGCAGACTTAGATGGACTAACTATCTACGCCCCGACCTCAAACACGACGGCTTCACACCCGAAGAAGA	69	477	KAG6396008.1	Hypothetical protein	Uncharacterized protein
2472	KAG6398279.1	82.353	68	12	0	1	68	157	224	3.01e-12	69.8	KAG6398279.1	76	56	56	0	82.35	1	1	TGCAGACTCCGCTGGACTAACTATCTCCGCCCCGACATCAAACGCGGACACTTCTCGCCCGAAGAAGA	TGCAGACTTAGATGGACTAACTATCTACGCCCCGACCTCAAACACGATGGCTTCACACCCGAAGAAGA	69	894	KAG6398279.1	transcription factor MYB, plant	K09422
2478	KAG6398588.1	89.831	59	5	1	3	60	19	77	2.03e-14	77	KAG6398588.1	84	53	53	1	89.83	1	1	CAGACTCGAGAGTTTCACACTCTTCGTGCTCTCCGCCACCTTCTCTTCTTTTC-CTTCC	CACACTCGAGACATTCACACTCTTCGTGCTCTCCGCCACCATCTCTTCTTTCCTCTTCC	69	579	KAG6398588.1	Hypothetical protein	Uncharacterized protein
2479	KAG6432912.1	86.765	68	9	0	2	69	1238	1171	4.77e-16	83.3	KAG6432912.1	91	59	59	0	86.76	1	-1	GCAGACTCGCAAACCGGGCCAACTATGTCAAACGTGGAGATCTCAGTATCCGGAGGTGAAGGTGAAAC	GCAGACTCGCAAACAGGACCGACTATATCAAACGTCGAGACCTCAGCATTCGGAGTTGAAGGTGAAAC	69	1452	KAG6432912.1	diaminopimelate decarboxylase [EC:4.1.1.20]	K01586
2479	KAG6436233.1	85.294	68	10	0	2	69	1211	1144	5.82e-15	78.8	KAG6436233.1	86	58	58	0	85.29	1	-1	GCAGACTCGCAAACCGGGCCAACTATGTCAAACGTGGAGATCTCAGTATCCGGAGGTGAAGGTGAAAC	GCAGACTCACAAACAGGACCGACTATATCAAATGTCGAGACCTCAGCATTCGGAGGTGAAGGTGAAAC	69	1425	KAG6436233.1	diaminopimelate decarboxylase [EC:4.1.1.20]	K01586
2488	KAG6419330.1	88.136	59	7	0	11	69	272	330	7.08e-14	76.1	KAG6419330.1	83	52	52	0	88.14	1	1	CAAGCTACAGCAAAGAATTCAAGCTCTTCAGGCTGGAAAAGGAAAGGCCTAATATGCAC	CAAGCTACAACAAAGAATCCAGACTCTTCAAGCTGGAAAAGCAAAGGCCTAATATGTAC	69	561	KAG6419330.1	prefoldin beta subunit	K04798
2488	KAG6416683.1	86.441	59	8	0	11	69	304	362	8.63e-13	71.6	KAG6416683.1	78	51	51	0	86.44	1	1	CAAGCTACAGCAAAGAATTCAAGCTCTTCAGGCTGGAAAAGGAAAGGCCTAATATGCAC	CAAGCTACAACAAAGAATCCAGACTCTCCAAGCTGGAAAAGCAAAGGCCTAATATGTAC	69	654	KAG6416683.1	prefoldin beta subunit	K04798
2489	KAG6422004.1	85.965	57	8	0	7	63	596	540	1.05e-11	68	KAG6422004.1	74	49	49	0	85.96	1	-1	CTCTCATCAGGTATAGAGTCTCCTACTGGACTCAAATCCTCCTTCTCTTCATTTATA	CTCTCATCAGGTATAGAGGCTTCCACTAGACTTAAATCCTTGTACTCTTCATTTATA	69	3723	KAG6422004.1	Hypothetical protein	Uncharacterized protein
2494	KAG6415306.1	85.075	67	10	0	3	69	2204	2138	2.03e-14	77	KAG6415306.1	84	57	57	0	85.07	1	-1	CAGACTCTGATAGCTTCCTTGTATTTTCCTCCATTCATTGGTAGACCGAATAATATGTTGTCTTGTA	CAAACTCTGATAGCTTCCTTGTATTTCTCCCCATTCATCGGCAAACCAAACAATATGTTTTCTTGTA	69	4494	KAG6415306.1	Hypothetical protein	Uncharacterized protein
2494	KAG6417824.1	83.582	67	11	0	3	69	2216	2150	8.63e-13	72.5	KAG6417824.1	79	56	56	0	83.58	1	-1	CAGACTCTGATAGCTTCCTTGTATTTTCCTCCATTCATTGGTAGACCGAATAATATGTTGTCTTGTA	CAAACTCTGATAGCTTCCTTGTATTTCTTCCCATTCATCGGCAAACCAAACAATATGTTTTCTTGTA	69	4590	KAG6417824.1	Hypothetical protein	Uncharacterized protein
2506	KAG6422532.1	94.231	52	3	0	1	52	1388	1439	1.67e-15	81.5	KAG6422532.1	89	49	49	0	94.23	1	1	TGCAGACTGAAGCTGCTTATGGAGCTGCATTGCTAGCCATGAAGGGTGCTGC	TGCACACGGAAGCTGCTTATGGAGCTGCATTGCTAGCCATCAAGGGTGCTGC	69	1452	KAG6422532.1	D-ribulokinase [EC:2.7.1.47]	K22935
2515	KAG6410919.1	92.188	64	5	0	4	67	1016	1079	2.64e-19	94.2	KAG6410919.1	103	59	59	0	92.19	1	1	AGACTGAGCCAGATTTTGATCTTGATATAAAGGACGATGTCCGGGAAGAATGTTCGAAATTTGG	AGACCGAGCCAGATTTTGATCTTGATATAAAGGAAGATGTCCAGGAGGAATGTTCAAAATTTGG	69	1269	KAG6410919.1	RNA-binding protein 23/39	K13091
2516	KAG6428450.1	84.058	69	11	0	1	69	571	503	7.08e-14	76.1	KAG6428450.1	83	58	58	0	84.06	1	-1	TGCAGACTGAGTAAAACGCCTTACACGCAGTCCCGGAGTCGATCGAGAAGCGGCGGGAGACGGCGGAGA	TGCAGACTGAATAAAACGCGATGCAGGCAGTCCGGGAGTCGAGAGAGAAACGGCACGAGACGGCGGAGA	69	1515	KAG6428450.1	Hypothetical protein	Uncharacterized protein
2516	KAG6431537.1	82.609	69	12	0	1	69	571	503	8.63e-13	71.6	KAG6431537.1	78	57	57	0	82.61	1	-1	TGCAGACTGAGTAAAACGCCTTACACGCAGTCCCGGAGTCGATCGAGAAGCGGCGGGAGACGGCGGAGA	TGCAGACTGAATAAAACGCGATGCAGGAAGTCCGGGAGTCGAGAGAGAAGCGGCGCGAGACAGCAGAGA	69	1548	KAG6431537.1	Hypothetical protein	Uncharacterized protein
2524	KAG6418131.1	92.308	65	5	0	5	69	539	475	7.56e-20	96	KAG6418131.1	105	60	60	0	92.31	1	-1	GACTGCGTAAATCGGCAGTTCTCATGGCTTACCAAACGTTCTGAGGGACGACCAGCCTTCTTCAG	GACTGAGTAAATCTGCAATTCTCATGGCTTACCAAGCGTTCTGAGGGCCGACCAGCCTTCTTCAG	69	726	KAG6418131.1	Hypothetical protein	Uncharacterized protein
2524	KAG6415614.1	90.769	65	6	0	5	69	698	634	9.22e-19	91.5	KAG6415614.1	100	59	59	0	90.77	1	-1	GACTGCGTAAATCGGCAGTTCTCATGGCTTACCAAACGTTCTGAGGGACGACCAGCCTTCTTCAG	GACTGAGTAAATCTGCAATTCTCATGGCTTACCAAGCGTTCCGAGGGTCGACCAGCCTTCTTCAG	69	885	KAG6415614.1	Hypothetical protein	Uncharacterized protein
2524	KAG6390125.1	87.879	66	8	0	4	69	477	412	1.37e-16	84.2	KAG6390125.1	92	58	58	0	87.88	1	-1	AGACTGCGTAAATCGGCAGTTCTCATGGCTTACCAAACGTTCTGAGGGACGACCAGCCTTCTTCAG	AGAATGCGTATATCTGCAGTTTTCATGGCTTACCAAGCGTTCTGAGGGCCGTCCGGCCTTCTTCAG	69	1005	KAG6390125.1	Hypothetical protein	Uncharacterized protein
2528	KAG6394904.1	90.164	61	6	0	9	69	3298	3358	1.37e-16	84.2	KAG6394904.1	92	55	55	0	90.16	1	1	GCTTATAATGCATTACAAGAAGCACATTCACAAGCAAAGCAGGAAAATGCATCTTTGCTGA	GCTTATAATGCATTACACGAAGCACACTCTCGAGCGAAGCAGGAAAATGCATGTTTGCTGA	69	5448	KAG6394904.1	Hypothetical protein	Uncharacterized protein
2528	KAG6393097.1	82.609	69	12	0	1	69	3152	3220	8.63e-13	71.6	KAG6393097.1	78	57	57	0	82.61	1	1	TGCAGACTGCTTATAATGCATTACAAGAAGCACATTCACAAGCAAAGCAGGAAAATGCATCTTTGCTGA	TGCAAGCGGCTTATAATGCATTACATGAAGCGCACTCTCGAGCGACGCAGGAAAATGCATGTTTACTGA	69	5280	KAG6393097.1	Hypothetical protein	Uncharacterized protein
2529	KAG6391999.1	85.714	56	8	0	3	58	1108	1163	3.67e-11	66.2	KAG6391999.1	72	48	48	0	85.71	1	1	CAGACTGGAATCGGCACCTCCATCGCCATTGCTGGAGTGGCTATGTACTCCTTCAT	CAAACTGGTATTGGTACTTCCATTGCCATTGCTGGAGTTGCTATGTACTCTTTCAT	69	1251	KAG6391999.1	solute carrier family 35, member E1	K15283
2529	KAG6393717.1	85.714	56	8	0	3	58	1216	1271	3.67e-11	66.2	KAG6393717.1	72	48	48	0	85.71	1	1	CAGACTGGAATCGGCACCTCCATCGCCATTGCTGGAGTGGCTATGTACTCCTTCAT	CAAACTGGTATTGGTACTTCCATTGCCATTGCTGGAGTTGCTATGTACTCTTTCAT	69	1368	KAG6393717.1	solute carrier family 35, member E1	K15283
2539	KAG6412201.1	93.333	60	4	0	1	60	5490	5549	9.22e-19	91.5	KAG6412201.1	100	56	56	0	93.33	1	1	TGCAGACTGGTTTGAGAAGAGACTTGCATATACGAGAAGTGTTGCAGCTAGTTCCATGGT	TGCAGATTGGTTTGAGAAGAGACTTGCATATACAAGAAGTGTGGCAGCTAGTTCAATGGT	69	6105	KAG6412201.1	serine-protein kinase ATM [EC:2.7.11.1]	K04728
2541	KAG6389282.1	85.507	69	10	0	1	69	2121	2053	1.67e-15	80.6	KAG6389282.1	88	59	59	0	85.51	1	-1	TGCAGACTGTCTTCTTGAAGAGGCAGATCCACACCTTGGCGAGCTCATACGACGTCTCTCACCATCTCC	TGCAGAGTGTCTTCTTGGAGAGGCAGAGCCACACCTTGCTGAGTTCAAACTACCTCTTTCACCATCTCC	69	2709	KAG6389282.1	kinesin family member C2/C3	K10406
2541	KAG6391112.1	85.507	69	10	0	1	69	2103	2035	1.67e-15	80.6	KAG6391112.1	88	59	59	0	85.51	1	-1	TGCAGACTGTCTTCTTGAAGAGGCAGATCCACACCTTGGCGAGCTCATACGACGTCTCTCACCATCTCC	TGCAGAGTGTCTTCTTGGAGAGGCAGAGCCACACCTTGCTGAGTTCAAACTACCTCTTTCACCATCTCC	69	2691	KAG6391112.1	kinesin family member C2/C3	K10406
2551	KAG6400362.1	86.957	69	9	0	1	69	1800	1732	1.37e-16	85.1	KAG6400362.1	93	60	60	0	86.96	1	-1	TGCAGACTTAGCAATTTTTGACAACTGCTTCAAACTATTGGGGATCTCATCTGAATCAGACTTCAAAAA	TGCAGAGCGAGCAATCTTCGACAACTGCTTCAAACTATTAGGAATCTCATCCGAATCAGACTCCAAAAA	69	2700	KAG6400362.1	Hypothetical protein	Uncharacterized protein
2551	KAG6438087.1	90	60	6	0	10	69	297	238	4.77e-16	82.4	KAG6438087.1	90	54	54	0	90	1	-1	AGCAATTTTTGACAACTGCTTCAAACTATTGGGGATCTCATCTGAATCAGACTTCAAAAA	AGCAATCTTCGACAACTGCTTCAAACTATTCGGGATTTCATCCGAATCAGACTCCAAAAA	69	1218	KAG6438087.1	Hypothetical protein	Uncharacterized protein
2551	KAG6402568.1	85.507	69	10	0	1	69	1572	1504	1.67e-15	80.6	KAG6402568.1	88	59	59	0	85.51	1	-1	TGCAGACTTAGCAATTTTTGACAACTGCTTCAAACTATTGGGGATCTCATCTGAATCAGACTTCAAAAA	TGCAGAGCGAGCAATCTTCGACAACTGCTTCAAACTATTAGGAATCTCATCCGAATCAGACTCCATAAA	69	2412	KAG6402568.1	Hypothetical protein	Uncharacterized protein
2552	KAG6410919.1	89.062	64	7	0	4	67	1016	1079	1.37e-16	85.1	KAG6410919.1	93	57	57	0	89.06	1	1	AGACTTAGCCAGAGTTTGATCTTGATATAAAGGACGATGTCCGGGAAGAATGTTCGAAATTTGG	AGACCGAGCCAGATTTTGATCTTGATATAAAGGAAGATGTCCAGGAGGAATGTTCAAAATTTGG	69	1269	KAG6410919.1	RNA-binding protein 23/39	K13091
2559	KAG6415624.1	88.406	69	7	1	1	68	777	709	3.92e-17	86	KAG6415624.1	94	61	61	1	88.41	1	-1	TGCAGACTTCGACTCAAAATTTCCTCTTTGCTTCTTTATTTGCAGCATATTTTTAGCAGA-AATTTTTT	TGCTGACTTCAAGTCAACTTTTCCTCTTTGCTTCTTTCTTTGCAGCATATTTTCAGCAGATAATTTTTT	69	2091	KAG6415624.1	Hypothetical protein	Uncharacterized protein
2562	KAG6398374.1	91.304	69	6	0	1	69	300	368	6.21e-21	98.7	KAG6398374.1	108	63	63	0	91.3	1	1	TGCAGACTTGACATACTGGGAGAGCGCAGCTCGCATGATTGCTGATGTGTCTAAGTCGGATAAGATTGT	TGCAGACTTGACTTACTGGGAGAGTGCTGCCCGCATGATTGCTGATGTGTCTAAGTCGGACAAGATCGT	69	1443	KAG6398374.1	UDPglucose 6-dehydrogenase [EC:1.1.1.22]	K00012
2562	KAG6396104.1	89.855	69	7	0	1	69	300	368	2.64e-19	94.2	KAG6396104.1	103	62	62	0	89.86	1	1	TGCAGACTTGACATACTGGGAGAGCGCAGCTCGCATGATTGCTGATGTGTCTAAGTCGGATAAGATTGT	TGCTGACTTGACTTACTGGGAGAGTGCTGCCCGCATGATTGCTGATGTGTCTAAGTCGGACAAGATCGT	69	1443	KAG6396104.1	UDPglucose 6-dehydrogenase [EC:1.1.1.22]	K00012
2562	KAG6405868.1	88.406	69	8	0	1	69	285	353	3.22e-18	89.7	KAG6405868.1	98	61	61	0	88.41	1	1	TGCAGACTTGACATACTGGGAGAGCGCAGCTCGCATGATTGCTGATGTGTCTAAGTCGGATAAGATTGT	TGCAGACTTGACTTACTGGGAGAATGCAGCCCGCATGATCGCTGATGTGTCTAAGTCAGAGAAGATCGT	69	1086	KAG6405868.1	Hypothetical protein	Uncharacterized protein
2563	KAG6398374.1	92.754	69	5	0	1	69	300	368	5.1e-22	103	KAG6398374.1	113	64	64	0	92.75	1	1	TGCAGACTTGACATACTGGGAGAGTGCAGCCCGCATGATTGCTGATGTGTCCAAGTCGGATAAGATTGT	TGCAGACTTGACTTACTGGGAGAGTGCTGCCCGCATGATTGCTGATGTGTCTAAGTCGGACAAGATCGT	69	1443	KAG6398374.1	UDPglucose 6-dehydrogenase [EC:1.1.1.22]	K00012
2563	KAG6396104.1	91.304	69	6	0	1	69	300	368	6.21e-21	98.7	KAG6396104.1	108	63	63	0	91.3	1	1	TGCAGACTTGACATACTGGGAGAGTGCAGCCCGCATGATTGCTGATGTGTCCAAGTCGGATAAGATTGT	TGCTGACTTGACTTACTGGGAGAGTGCTGCCCGCATGATTGCTGATGTGTCTAAGTCGGACAAGATCGT	69	1443	KAG6396104.1	UDPglucose 6-dehydrogenase [EC:1.1.1.22]	K00012
2563	KAG6405868.1	89.855	69	7	0	1	69	285	353	2.64e-19	94.2	KAG6405868.1	103	62	62	0	89.86	1	1	TGCAGACTTGACATACTGGGAGAGTGCAGCCCGCATGATTGCTGATGTGTCCAAGTCGGATAAGATTGT	TGCAGACTTGACTTACTGGGAGAATGCAGCCCGCATGATCGCTGATGTGTCTAAGTCAGAGAAGATCGT	69	1086	KAG6405868.1	Hypothetical protein	Uncharacterized protein
2569	KAG6406735.1	86.567	67	9	0	1	67	618	684	1.67e-15	81.5	KAG6406735.1	89	58	58	0	86.57	1	1	TGCAGACTTGATCACCAAGGGAAACGCCTATCTTTCTAATCGAAAAACAGATGCGACTAAACTGCTG	TGAAGACTTGATCATCAGGGGAAACACCTATCTTTCTAATCGACAGACAGAAGCAAGTAAACTGCTG	69	1122	KAG6406735.1	Hypothetical protein	Uncharacterized protein
2569	KAG6382367.1	85.075	67	10	0	1	67	594	660	2.03e-14	77	KAG6382367.1	84	57	57	0	85.07	1	1	TGCAGACTTGATCACCAAGGGAAACGCCTATCTTTCTAATCGAAAAACAGATGCGACTAAACTGCTG	TGAAGGCTTTATCATCAAGGGAAACACCTATCTTTCTAATCGACCAACAGAAGCAAGTAAACTGCTG	69	1002	KAG6382367.1	Hypothetical protein	Uncharacterized protein
2569	KAG6409101.1	83.582	67	11	0	1	67	225	291	8.63e-13	72.5	KAG6409101.1	79	56	56	0	83.58	1	1	TGCAGACTTGATCACCAAGGGAAACGCCTATCTTTCTAATCGAAAAACAGATGCGACTAAACTGCTG	TGAAGGCTTTATCATCAAGGGAAACACCTATCTTTCTAATCGACCGACAGAAGCAAGTAAACTGCTG	69	603	KAG6409101.1	Hypothetical protein	Uncharacterized protein
2570	KAG6416004.1	83.582	67	11	0	1	67	1773	1839	8.63e-13	72.5	KAG6416004.1	79	56	56	0	83.58	1	1	TGCAGACTTGATGATGCTAATGTTGGATAATGATATTAGACCAAATGTGAATCTGTCAACCGATGCA	TGCAGACTTGATGATGCTGATGTTGAACAATGAGATAAGACCGAATATCAATCTATCGACCAATGCA	69	2247	KAG6416004.1	Hypothetical protein	Uncharacterized protein
2571	KAG6416004.1	83.582	67	11	0	1	67	1773	1839	8.63e-13	72.5	KAG6416004.1	79	56	56	0	83.58	1	1	TGCAGACTTGATGATGCTAATGTTGGATAATGATATTAGACCAAATGTGAATCTGTCAACCGATGCA	TGCAGACTTGATGATGCTGATGTTGAACAATGAGATAAGACCGAATATCAATCTATCGACCAATGCA	69	2247	KAG6416004.1	Hypothetical protein	Uncharacterized protein
2575	KAG6434332.1	91.304	69	6	0	1	69	4863	4795	6.21e-21	98.7	KAG6434332.1	108	63	63	0	91.3	1	-1	TGCAGACTTGCCACCTCCTCGCGTGACTGCATTTATTTGTACCTCAATGTTGCTCATCTGCTTGATCAT	TGCAGACTTGCCACCTCCACGAGTAACTGTATTTATTTGTTGCTCAATGTTGCTCATCTGCTTGATCAT	69	5949	KAG6434332.1	Hypothetical protein	Uncharacterized protein
2575	KAG6437703.1	91.176	68	6	0	2	69	5189	5122	2.17e-20	96.9	KAG6437703.1	106	62	62	0	91.18	1	-1	GCAGACTTGCCACCTCCTCGCGTGACTGCATTTATTTGTACCTCAATGTTGCTCATCTGCTTGATCAT	GCAGACTTGCCACCTCCACGAGTAACTGTATTTATTTGTTGCTCAATGTTGCTCATCTGCTTGATCAT	69	6150	KAG6437703.1	Hypothetical protein	Uncharacterized protein
2575	KAG6427149.1	89.855	69	7	0	1	69	5703	5635	2.64e-19	94.2	KAG6427149.1	103	62	62	0	89.86	1	-1	TGCAGACTTGCCACCTCCTCGCGTGACTGCATTTATTTGTACCTCAATGTTGCTCATCTGCTTGATCAT	TGCAGACTTGCCACCTCCACGAGTGACTGTATTTATTTGTTGTTCGATGTTGCTCATCTGCTTGATCAT	69	6711	KAG6427149.1	Hypothetical protein	Uncharacterized protein
2577	KAG6431511.1	86.667	60	8	0	7	66	755	814	2.47e-13	73.4	KAG6431511.1	80	52	52	0	86.67	1	1	CTTGCTTACTGCTAGTGATATTCGGAATCGTGCTTCTCATAGTGATCATAGTGCTTGCTG	CTTGCTTGTTGCTCGTGATTTTTGGAATCGTGCTTCTCATAGTAATTATAGTACTTGCTG	69	819	KAG6431511.1	syntaxin 7	K08488
2578	KAG6414915.1	93.651	63	4	0	1	63	2037	2099	2.17e-20	96.9	KAG6414915.1	106	59	59	0	93.65	1	1	TGCAGACTTGGCGTCTTCTAGTGGACACAAGGGAATATCTGGCTTCCTTGCTGAGACTTCCTT	TGCAGACCTGGCTTCTTCTAGTGGACACAAGGGAATATCTGGCTTCCTTGCCGAGACGTCCTT	69	3111	KAG6414915.1	calmodulin-binding transcription activator	K21596
2578	KAG6417417.1	93.651	63	4	0	1	63	1836	1898	2.17e-20	96.9	KAG6417417.1	106	59	59	0	93.65	1	1	TGCAGACTTGGCGTCTTCTAGTGGACACAAGGGAATATCTGGCTTCCTTGCTGAGACTTCCTT	TGCAGACCTGGCTTCTTCTAGTGGCCACAAGGGAATATCTGGCTTCCTTGCTGAGACGTCCTT	69	2736	KAG6417417.1	Hypothetical protein	Uncharacterized protein
2581	KAG6393359.1	88.406	69	8	0	1	69	1096	1028	3.22e-18	89.7	KAG6393359.1	98	61	61	0	88.41	1	-1	TGCAGACTTGTACAATCTTTTGCTGTTCCGATGGGACCTGCTCCAATGGGATCTGTGCACCAAGGTCTC	TGCAGAGCTGTACAATCTTTTGTTGCTCTGATGGGACCTGCTCCAACGGGATCTGTGCACCGAGATCTC	69	1713	KAG6393359.1	pyruvate kinase [EC:2.7.1.40]	K00873
2585	KAG6421750.1	89.062	64	7	0	1	64	475	412	1.37e-16	85.1	KAG6421750.1	93	57	57	0	89.06	1	-1	TGCAGACTTGTGGATACACTGATGGAGGAAGTGCAAGGTAGAAGAGCCTCCGGGATGATCCTTC	TGCAGACTTGTGGATACACTGATGGAGGGAGAGCAAGGTAGAAAAGCCTCCTACTTGATCCTTC	69	1575	KAG6421750.1	Hypothetical protein	Uncharacterized protein
2585	KAG6390089.1	87.5	64	8	0	1	64	475	412	1.67e-15	80.6	KAG6390089.1	88	56	56	0	87.5	1	-1	TGCAGACTTGTGGATACACTGATGGAGGAAGTGCAAGGTAGAAGAGCCTCCGGGATGATCCTTC	TGCAGACTGGCGGATAAACAGACGGTGGAAGTGCAAGGTAGAAAAGCCTGCGGGATGATCCTTC	69	2064	KAG6390089.1	glucose-6-phosphate 1-dehydrogenase [EC:1.1.1.49 1.1.1.363]	K00036
2585	KAG6412778.1	87.5	64	8	0	1	64	478	415	1.67e-15	80.6	KAG6412778.1	88	56	56	0	87.5	1	-1	TGCAGACTTGTGGATACACTGATGGAGGAAGTGCAAGGTAGAAGAGCCTCCGGGATGATCCTTC	TGCAGACTGGCGGATAAACAGACGGTGGAAGTGCAAGGTAGAAAAGCCTACGGGATGATCCTTC	69	1542	KAG6412778.1	glucose-6-phosphate 1-dehydrogenase [EC:1.1.1.49 1.1.1.363]	K00036
2586	KAG6411384.1	92.754	69	5	0	1	69	582	650	5.1e-22	103	KAG6411384.1	113	64	64	0	92.75	1	1	TGCAGACTTGTGGTCATGTGGAGTCATACTCTTTGTATTGCTTGCCGGTTACTTGCCGTTTGATGATTC	TGCAGACTTGTGGTCATGTGGAGTCATACTGTTTGTGTTGCTCGCAGGTTACTTGCCTTTTGATGATTC	69	1317	KAG6411384.1	Hypothetical protein	Uncharacterized protein
2586	KAG6414011.1	91.304	69	6	0	1	69	651	719	6.21e-21	98.7	KAG6414011.1	108	63	63	0	91.3	1	1	TGCAGACTTGTGGTCATGTGGAGTCATACTCTTTGTATTGCTTGCCGGTTACTTGCCGTTTGATGATTC	TGCAGACTTGTGGTCGTGTGGAGTCATACTGTTTGTGTTGCTCGCAGGTTACTTGCCTTTTGATGATTC	69	1386	KAG6414011.1	Hypothetical protein	Uncharacterized protein
2586	KAG6409966.1	89.855	69	7	0	1	69	585	653	2.64e-19	94.2	KAG6409966.1	103	62	62	0	89.86	1	1	TGCAGACTTGTGGTCATGTGGAGTCATACTCTTTGTATTGCTTGCCGGTTACTTGCCGTTTGATGATTC	TGCAGACTTGTGGTCTTGTGGAGTCATACTTTTCGTATTGCTTGCGGGCTACTTGCCTTTCGATGATTC	69	1323	KAG6409966.1	Hypothetical protein	Uncharacterized protein
2587	KAG6409966.1	88.406	69	8	0	1	69	585	653	3.22e-18	89.7	KAG6409966.1	98	61	61	0	88.41	1	1	TGCAGACTTGTGGTCTTGTGGTGTCATACTCTTTGTACTGCTTGCTGGTTACTTGCCGTTTGATGATTC	TGCAGACTTGTGGTCTTGTGGAGTCATACTTTTCGTATTGCTTGCGGGCTACTTGCCTTTCGATGATTC	69	1323	KAG6409966.1	Hypothetical protein	Uncharacterized protein
2587	KAG6411384.1	88.406	69	8	0	1	69	582	650	3.22e-18	89.7	KAG6411384.1	98	61	61	0	88.41	1	1	TGCAGACTTGTGGTCTTGTGGTGTCATACTCTTTGTACTGCTTGCTGGTTACTTGCCGTTTGATGATTC	TGCAGACTTGTGGTCATGTGGAGTCATACTGTTTGTGTTGCTCGCAGGTTACTTGCCTTTTGATGATTC	69	1317	KAG6411384.1	Hypothetical protein	Uncharacterized protein
2587	KAG6414011.1	88.406	69	8	0	1	69	651	719	3.22e-18	89.7	KAG6414011.1	98	61	61	0	88.41	1	1	TGCAGACTTGTGGTCTTGTGGTGTCATACTCTTTGTACTGCTTGCTGGTTACTTGCCGTTTGATGATTC	TGCAGACTTGTGGTCGTGTGGAGTCATACTGTTTGTGTTGCTCGCAGGTTACTTGCCTTTTGATGATTC	69	1386	KAG6414011.1	Hypothetical protein	Uncharacterized protein
2588	KAG6409966.1	88.406	69	8	0	1	69	585	653	3.22e-18	89.7	KAG6409966.1	98	61	61	0	88.41	1	1	TGCAGACTTGTGGTCTTGTGGTGTCATACTCTTTGTACTGCTTGCTGGTTACTTGCCGTTTGATGATTC	TGCAGACTTGTGGTCTTGTGGAGTCATACTTTTCGTATTGCTTGCGGGCTACTTGCCTTTCGATGATTC	69	1323	KAG6409966.1	Hypothetical protein	Uncharacterized protein
2588	KAG6411384.1	88.406	69	8	0	1	69	582	650	3.22e-18	89.7	KAG6411384.1	98	61	61	0	88.41	1	1	TGCAGACTTGTGGTCTTGTGGTGTCATACTCTTTGTACTGCTTGCTGGTTACTTGCCGTTTGATGATTC	TGCAGACTTGTGGTCATGTGGAGTCATACTGTTTGTGTTGCTCGCAGGTTACTTGCCTTTTGATGATTC	69	1317	KAG6411384.1	Hypothetical protein	Uncharacterized protein
2588	KAG6414011.1	88.406	69	8	0	1	69	651	719	3.22e-18	89.7	KAG6414011.1	98	61	61	0	88.41	1	1	TGCAGACTTGTGGTCTTGTGGTGTCATACTCTTTGTACTGCTTGCTGGTTACTTGCCGTTTGATGATTC	TGCAGACTTGTGGTCGTGTGGAGTCATACTGTTTGTGTTGCTCGCAGGTTACTTGCCTTTTGATGATTC	69	1386	KAG6414011.1	Hypothetical protein	Uncharacterized protein
2591	KAG6423396.1	90.164	61	6	0	1	61	1881	1821	1.37e-16	84.2	KAG6423396.1	92	55	55	0	90.16	1	-1	TGCAGACTTTGAAGAGAGGAAAGTATGGTGTTGCAGACGAGACATCCCAAAATCACAAACC	TGCAGACTTCGAAGATAGGAAAGTATTGTGCTGCAGACGAGACATGCCAAAATCACACACC	69	2424	KAG6423396.1	sterile alpha motif and leucine zipper containing kinase AZK [EC:2.7.11.25]	K04424
2591	KAG6414538.1	88.71	62	7	0	1	62	1929	1868	1.67e-15	81.5	KAG6414538.1	89	55	55	0	88.71	1	-1	TGCAGACTTTGAAGAGAGGAAAGTATGGTGTTGCAGACGAGACATCCCAAAATCACAAACCT	TGCAGACTTTGAAGATAAGAAAGTATGGTGCTGCAGGCGAGACATACCAAAATCGCACACCT	69	2298	KAG6414538.1	sterile alpha motif and leucine zipper containing kinase AZK [EC:2.7.11.25]	K04424
2591	KAG6417093.1	88.71	62	7	0	1	62	2007	1946	1.67e-15	81.5	KAG6417093.1	89	55	55	0	88.71	1	-1	TGCAGACTTTGAAGAGAGGAAAGTATGGTGTTGCAGACGAGACATCCCAAAATCACAAACCT	TGCAGACTTCGAAGATAGGAACGTATGGTGCTGCAGACGAGACATACCAAAATCGCAGACCT	69	2346	KAG6417093.1	serine/threonine-protein kinase CTR1 [EC:2.7.11.1]	K14510
2593	KAG6384465.1	91.304	69	6	0	1	69	529	461	6.21e-21	98.7	KAG6384465.1	108	63	63	0	91.3	1	-1	TGCAGACTTTGCCATCTGCACCTCTGTAGAATCTGAAGAATGGCAAGACATGAACATGTAGAGCATAGC	TGCACACTTTCCCATCTGCACCTCTATAGAATCTGAAGAAGGGCAAGACATGAACATGGAGGGCATAGC	69	765	KAG6384465.1	Hypothetical protein	Uncharacterized protein
2593	KAG6391773.1	91.304	69	6	0	1	69	529	461	6.21e-21	98.7	KAG6391773.1	108	63	63	0	91.3	1	-1	TGCAGACTTTGCCATCTGCACCTCTGTAGAATCTGAAGAATGGCAAGACATGAACATGTAGAGCATAGC	TGCACACATTCCCATCTGCACCTCTGTAGAATCTGAAGAAGGGCAAGACATGAACATGGAGGGCATAGC	69	765	KAG6391773.1	Hypothetical protein	Uncharacterized protein
2593	KAG6390009.1	89.855	69	7	0	1	69	529	461	2.64e-19	94.2	KAG6390009.1	103	62	62	0	89.86	1	-1	TGCAGACTTTGCCATCTGCACCTCTGTAGAATCTGAAGAATGGCAAGACATGAACATGTAGAGCATAGC	TGCACACTTTCCCATCTGCACCTGTATAGAATCTGAAGAAGGGCAAGACATGAACATGGAGGGCATAGC	69	765	KAG6390009.1	Hypothetical protein	Uncharacterized protein
2594	KAG6388939.1	83.582	67	11	0	1	67	893	959	8.63e-13	72.5	KAG6388939.1	79	56	56	0	83.58	1	1	TGCAGACTTTGGCTCTTCTCTTTAGGCCGAAGACTACGCATAAGTTTAGAAAGTATTGGAAATCGTA	TGCAGACGGTGGCGCTGGTGTTCAGGCCGAAGACGACGCATAAGTTTAGGAAGTACTGGAAGTCGTA	69	1212	KAG6388939.1	Hypothetical protein	Uncharacterized protein
2594	KAG6390881.1	82.09	67	12	0	1	67	899	965	1.05e-11	68	KAG6390881.1	74	55	55	0	82.09	1	1	TGCAGACTTTGGCTCTTCTCTTTAGGCCGAAGACTACGCATAAGTTTAGAAAGTATTGGAAATCGTA	TGCAGACGGTGGCGCTGGTGTTCAGGCCGAAGACGACGCATAAGTTGAGGAAGTACTGGAAGTCGTA	69	1215	KAG6390881.1	Hypothetical protein	Uncharacterized protein
2597	KAG6421665.1	86.154	65	9	0	1	65	3333	3397	2.03e-14	77.9	KAG6421665.1	85	56	56	0	86.15	1	1	TGCAGACTTTGTCCAACAGGTTGATAACCTGCACAATGTAACTGAGTTTGTTTGTGCCATTACAG	TGCAGACTTTGTTGTACAGGTTGGCAACCTGAATTATGTAACTGAGTTTGTTTGTGCCATTAAAG	69	5028	KAG6421665.1	elongator complex protein 1	K11373
2597	KAG6424700.1	86.154	65	9	0	1	65	2268	2332	2.03e-14	77.9	KAG6424700.1	85	56	56	0	86.15	1	1	TGCAGACTTTGTCCAACAGGTTGATAACCTGCACAATGTAACTGAGTTTGTTTGTGCCATTACAG	TGCAGACTTTATTGTACAGGTTGGCAACCTGAACTATGTAACTGAGTTTGTTTGTGCCATTAAAG	69	3966	KAG6424700.1	elongator complex protein 1	K11373
2600	KAG6396436.1	94.444	54	3	0	6	59	2035	2088	1.37e-16	85.1	KAG6396436.1	93	51	51	0	94.44	1	1	ACTTTTACGCCGCATATGCAGCCCACAGTTGCAAAAGCTAGTGATATCAGCCCA	ACTTTTACACCGCATATGCAACCCACAGTTGCAAAAGTTAGTGATATCAGCCCA	69	3048	KAG6396436.1	Hypothetical protein	Uncharacterized protein
2600	KAG6398727.1	91.379	58	5	0	2	59	2001	2058	4.77e-16	83.3	KAG6398727.1	91	53	53	0	91.38	1	1	GCAGACTTTTACGCCGCATATGCAGCCCACAGTTGCAAAAGCTAGTGATATCAGCCCA	GCAGACTTTTACACCGCATATGCAACCTACAGTTGCAAAAGTTAGTGGTATCAGCCCA	69	3018	KAG6398727.1	Hypothetical protein	Uncharacterized protein
2610	KAG6435261.1	86.154	65	9	0	4	68	751	815	2.03e-14	77.9	KAG6435261.1	85	56	56	0	86.15	1	1	AGAGAAAATCTGAGAAATGTCTTGTTGTCTGTCTACGGAAATAAGGAGTACGTGGATGACGACCT	AGAGAGAATCTGAGAAATGTGCTGTTGTCTGTTTATGGAAATAAGGAGAACGTCGATGATGAACT	69	1176	KAG6435261.1	Hypothetical protein	Uncharacterized protein
2614	KAG6417218.1	86.567	67	9	0	3	69	1184	1250	1.67e-15	81.5	KAG6417218.1	89	58	58	0	86.57	1	1	CAGAGAAAATTGAAGCAGCTGGTAAGAAGAAGGAAGAAGGGAATGCATTGTTCAGGGCCGGGAAATA	CAGAAAAAATCGAAGCTGCTGGTAAAAAGAAAGAAGAAGGCAACACATTGTTCAAGGCCGGGAAATA	69	1731	KAG6417218.1	FK506-binding protein 4/5 [EC:5.2.1.8]	K09571
2614	KAG6414688.1	86.154	65	9	0	5	69	1186	1250	2.03e-14	77.9	KAG6414688.1	85	56	56	0	86.15	1	1	GAGAAAATTGAAGCAGCTGGTAAGAAGAAGGAAGAAGGGAATGCATTGTTCAGGGCCGGGAAATA	GAAAAAATCGAAGCTGCTGGTAAAAAGAAGGAAGAAGGCAACACATTGTTCAAGGCTGGGAAATA	69	1731	KAG6414688.1	FK506-binding protein 4/5 [EC:5.2.1.8]	K09571
2619	KAG6390880.1	81.159	69	13	0	1	69	397	465	3.67e-11	67.1	KAG6390880.1	73	56	56	0	81.16	1	1	TGCAGAGAAACACTCTGTTCTGAGATAGTAGTGCAGTTTCTTGATGCGAATTTCATTTCTTGGGGTGGG	TGCAGAGAGACTCTTTCATCCGAGCTCGTGGTGCAGTTTCTTGATGCAAATTTCATTAGCTGGGGTGGG	69	1101	KAG6390880.1	FAS-associated factor 2	K18726
2623	KAG6429161.1	84.615	65	10	0	1	65	812	876	2.47e-13	73.4	KAG6429161.1	80	55	55	0	84.62	1	1	TGCAGAGAAACCAACTGTCCGGCCCAATCGATCCGGTTGATCAGGTGACGATCGCAACCGTTGAT	TGCAGAGAAACCAGTTCTCTGGCCCGATCGAACCGGTTGATCAAGTTACGATCGCAACGGTGGAT	69	1197	KAG6429161.1	Hypothetical protein	Uncharacterized protein
2626	KAG6429502.1	90	60	6	0	1	60	794	735	4.77e-16	82.4	KAG6429502.1	90	54	54	0	90	1	-1	TGCAGAGAAACGAGACTATCGTAGAAATATCGCATGCTGTGGTTCAAAGCTATGTCGCGT	TGCAGAGAAACGAGGCTTTTGTAGAAATATCGCATGCTGTGGTTCATAGCAATGTCTCGT	69	1287	KAG6429502.1	Hypothetical protein	Uncharacterized protein
2626	KAG6383332.1	88.333	60	7	0	1	60	500	441	2.03e-14	77.9	KAG6383332.1	85	53	53	0	88.33	1	-1	TGCAGAGAAACGAGACTATCGTAGAAATATCGCATGCTGTGGTTCAAAGCTATGTCGCGT	TGCAGATAAACGAGGCTTTTGTAGAAATATCGCATGCTGTGGTTCATAGCAATGTCTCGT	69	852	KAG6383332.1	O-palmitoleoyl-L-serine hydrolase [EC:3.1.1.98]	K19882
2626	KAG6426516.1	88.333	60	7	0	1	60	500	441	2.03e-14	77.9	KAG6426516.1	85	53	53	0	88.33	1	-1	TGCAGAGAAACGAGACTATCGTAGAAATATCGCATGCTGTGGTTCAAAGCTATGTCGCGT	TGCAGATAAACGAGGCTTTTGTAGAAATATCGCATGCTGTGGTTCATAGCAATGTCTCGT	69	993	KAG6426516.1	Hypothetical protein	Uncharacterized protein
2627	KAG6394206.1	82.353	68	12	0	1	68	788	721	3.01e-12	69.8	KAG6394206.1	76	56	56	0	82.35	1	-1	TGCAGAGAAACGGGATATTGCTCGCCGTCATAGTAAAGAGTACCGACGAAAGAATAGAGATCCTCATT	TGCAGAGAGACGGGATACTGCTCACCGTTGTAAAAAAGAGTTCCGAGAAAGGAATAAAGATCCTCATT	69	3555	KAG6394206.1	phospholipid-translocating ATPase [EC:7.6.2.1]	K01530
2627	KAG6398227.1	82.353	68	12	0	1	68	758	691	3.01e-12	69.8	KAG6398227.1	76	56	56	0	82.35	1	-1	TGCAGAGAAACGGGATATTGCTCGCCGTCATAGTAAAGAGTACCGACGAAAGAATAGAGATCCTCATT	TGCAGGGAGAGGGGATGCTGCTTATCGTTATAGTAAAGAGTTCCGACAAAAGAATAAAGATCCTCATT	69	3525	KAG6398227.1	phospholipid-translocating ATPase [EC:7.6.2.1]	K01530
2629	KAG6406009.1	87.879	66	8	0	2	67	3204	3269	1.37e-16	84.2	KAG6406009.1	92	58	58	0	87.88	1	1	GCAGAGAAACGTGAGCAAAAATTGGCATATCAGTTCCTCTTTCCCTAGCGATGCTGTGATTTCGGC	GCATAGAAATGTGAGCAAAAATTGGCATGTCAGTTCTTCTTTTCCAAGTGATGCTGTGATTTCTGC	69	4539	KAG6406009.1	DNA excision repair protein ERCC-5	K10846
2633	KAG6395705.1	89.855	69	7	0	1	69	191	259	2.64e-19	94.2	KAG6395705.1	103	62	62	0	89.86	1	1	TGCAGAGAAAGAAGAGAGTTGCTTGCTACAAGGCTTATACTGTGGAAGGGAAGATGAAGGGCTCTGTGA	TGCAGAGGAAGAAGAGGGTTGCTTTCTACAAAGCTTACACTGTTGAGGGGAAGATGAAGGGCTCTGTGA	69	318	KAG6395705.1	Hypothetical protein	Uncharacterized protein
2633	KAG6397982.1	89.855	69	7	0	1	69	191	259	2.64e-19	94.2	KAG6397982.1	103	62	62	0	89.86	1	1	TGCAGAGAAAGAAGAGAGTTGCTTGCTACAAGGCTTATACTGTGGAAGGGAAGATGAAGGGCTCTGTGA	TGCAGAGGAAGAAGAGGGTTGCTTTCTACAAAGCTTACACTGTTGAGGGGAAGATGAAGGGCTCTGTGA	69	315	KAG6397982.1	Hypothetical protein	Uncharacterized protein
2633	KAG6428596.1	87.5	64	8	0	1	64	290	353	1.67e-15	80.6	KAG6428596.1	88	56	56	0	87.5	1	1	TGCAGAGAAAGAAGAGAGTTGCTTGCTACAAGGCTTATACTGTGGAAGGGAAGATGAAGGGCTC	TGCAGAGGAAGAAGAGAGTTGCTAGCTACAAGGCTTATACGGTTGAGGGGAAAGTGAAGGGATC	69	498	KAG6428596.1	Hypothetical protein	Uncharacterized protein
2646	KAG6433508.1	85	60	9	0	2	61	926	867	1.05e-11	68.9	KAG6433508.1	75	51	51	0	85	1	-1	GCAGAGAAATCATGCCTCTGTTTGGCCTTGGCAACCTTTGTTGGATAGTCGGACACTTTA	GCTGAGAAATCATGTCTTTGTTTGGCCTTTGGAACCTTGGTTGGAAAGTCTGTCACTTTA	69	1440	KAG6433508.1	A/G-specific adenine glycosylase [EC:3.2.2.31]	K03575
2647	KAG6433508.1	85	60	9	0	2	61	926	867	1.05e-11	68.9	KAG6433508.1	75	51	51	0	85	1	-1	GCAGAGAAATCATGCCTCTGTTTGGCCTTGGCAACCTTTGTTGGATAGTCGGACACTTTA	GCTGAGAAATCATGTCTTTGTTTGGCCTTTGGAACCTTGGTTGGAAAGTCTGTCACTTTA	69	1440	KAG6433508.1	A/G-specific adenine glycosylase [EC:3.2.2.31]	K03575
2651	KAG6423291.1	89.062	64	7	0	1	64	688	625	1.37e-16	85.1	KAG6423291.1	93	57	57	0	89.06	1	-1	TGCAGAGAAATGGTAAATCAAGAACTGTTCCGCTGTGACAAGCATCTATGATGGCATGAAGCTT	TGCAAAGAAATGGTAAATCAAGAACCGTTCCACTATGACAAGCATCAATGATAGCATGTAGCTT	69	1098	KAG6423291.1	metacaspase-1 [EC:3.4.22.-]	K22684
2651	KAG6420264.1	87.5	64	8	0	1	64	688	625	1.67e-15	80.6	KAG6420264.1	88	56	56	0	87.5	1	-1	TGCAGAGAAATGGTAAATCAAGAACTGTTCCGCTGTGACAAGCATCTATGATGGCATGAAGCTT	TGCAAAGAAATGGCAAATCAAGAACCGTTCCACTATGACAAGCATCAATGATAGCATGTAGCTT	69	1098	KAG6420264.1	metacaspase-1 [EC:3.4.22.-]	K22684
2651	KAG6383641.1	84.375	64	10	0	1	64	619	556	8.63e-13	71.6	KAG6383641.1	78	54	54	0	84.38	1	-1	TGCAGAGAAATGGTAAATCAAGAACTGTTCCGCTGTGACAAGCATCTATGATGGCATGAAGCTT	TGCAAAGATAGGGTAAATCAAGCACTGTGCCGCTGTGACACGCATCTATTATTGCGTGCAGCTT	69	1020	KAG6383641.1	Hypothetical protein	Uncharacterized protein
2655	KAG6406295.1	90.385	52	5	0	18	69	787	736	8.63e-13	72.5	KAG6406295.1	79	47	47	0	90.38	1	-1	AACAAGTTTGCTGACACTTGACACGGTCCAGGACTCCAGCAGAAAGCTTGTT	AACAAGTTTGTGGACATTTGGCACGGTCCAGAACTCCAGCAGAAAGCTTGTT	69	1431	KAG6406295.1	Hypothetical protein	Uncharacterized protein
2663	KAG6435030.1	87.879	66	8	0	1	66	56	121	1.37e-16	84.2	KAG6435030.1	92	58	58	0	87.88	1	1	TGCAGAGAACATGGGAGCGGGTGCGGGTGGCGGAGGAGGCGGAAGAGCGGCTGTGCTGGCAGCTGG	TGCAGAGCATACGGGAGCGGCTGCGGGTGGCGGAGGAGGGGGAGGAGCGGTTGTGCTTGCAGCTGG	69	231	KAG6435030.1	Hypothetical protein	Uncharacterized protein
2663	KAG6438368.1	85.507	69	10	0	1	69	56	124	1.67e-15	80.6	KAG6438368.1	88	59	59	0	85.51	1	1	TGCAGAGAACATGGGAGCGGGTGCGGGTGGCGGAGGAGGCGGAAGAGCGGCTGTGCTGGCAGCTGGCGG	TGCAGAGCATACGGGAGCGGCTGCGGGTGGCGGAGGAGGGGGAGGAGCGGCTGTGCCATCAGCTGGGGG	69	228	KAG6438368.1	Hypothetical protein	Uncharacterized protein
2663	KAG6435029.1	87.5	56	6	1	14	68	150	205	3.67e-11	67.1	KAG6435029.1	73	49	49	1	87.5	1	1	GGAGCGGGTGCGGGTGGCGGAGGAGGCGGAAGAGCGGCTGTGCTGGCAGCT-GGCG	GGAGCGGCTGAGGGTGGCGGAGGAGGCGGAGGAGCGCCTCTGCTCGCAGCTCGGCG	69	336	KAG6435029.1	Hypothetical protein	Uncharacterized protein
2664	KAG6408909.1	85.714	63	9	0	6	68	1056	994	2.47e-13	74.3	KAG6408909.1	81	54	54	0	85.71	1	-1	AGAACCAAACTCTCTGCTGTTTTGATACTCTGATGAGCTTGGGAGGAAGAAGTGGTCTTTTGG	AGAACCAAACTCTCTGCTGTTTTGATAACCTGATGAACTCGGCAAGAAAAAGTGGTCATTCGG	69	1272	KAG6408909.1	Hypothetical protein	Uncharacterized protein
2672	KAG6428564.1	93.478	46	2	1	24	69	714	670	3.67e-11	67.1	KAG6428564.1	73	43	43	1	93.48	1	-1	ATCAGCATACCTGTAGCCGGAAGACAAATGACAAATCATTCTGTTT	ATCAGCA-ACCTGCAGCCGGAAGACAAATGACAAATCACTCTGTTT	69	2349	KAG6428564.1	Hypothetical protein	Uncharacterized protein
2672	KAG6431657.1	93.478	46	2	1	24	69	684	640	3.67e-11	67.1	KAG6431657.1	73	43	43	1	93.48	1	-1	ATCAGCATACCTGTAGCCGGAAGACAAATGACAAATCATTCTGTTT	ATCAGCA-ACCTGCAGCCGGAAGACAAATGACAAATCACTCTGTTT	69	2514	KAG6431657.1	Hypothetical protein	Uncharacterized protein
2675	KAG6398337.1	85.507	69	10	0	1	69	390	458	1.67e-15	80.6	KAG6398337.1	88	59	59	0	85.51	1	1	TGCAGAGAACTCAGAAGAAGCCTCCCATGTTACTGTCGGACTTGTAGTACCATCTGATCAGATTGGGTG	TGCAGAGGACTCGGATGACCCCCCTCATGTTACTGTCCGACTTCTAGTGCCATCTGATCAGATTGGGTG	69	1653	KAG6398337.1	poly(rC)-binding protein 3/4	K21444
2675	KAG6396065.1	84.058	69	11	0	1	69	390	458	7.08e-14	76.1	KAG6396065.1	83	58	58	0	84.06	1	1	TGCAGAGAACTCAGAAGAAGCCTCCCATGTTACTGTCGGACTTGTAGTACCATCTGATCAGATTGGGTG	TGCAGAGGACTCGGATGACCCCCCTCATGTTACTGTCCGACTTCTAGTGCCATCCGATCAGATTGGGTG	69	1620	KAG6396065.1	poly(rC)-binding protein 3/4	K21444
2680	KAG6396696.1	83.582	67	11	0	1	67	122	188	8.63e-13	72.5	KAG6396696.1	79	56	56	0	83.58	1	1	TGCAGAGAACTTGCTCAGCCCTTTCTTTATCTTCACTATCTCTATCTTTATCTCAGAACTCTACTGA	TGCAAAGGACTTGCTCCGCGCTTTCATTATCTTCTCTATCCCTGTCTCTGTCTCAGAACTCAACTGA	69	894	KAG6396696.1	DNA-3-methyladenine glycosylase I [EC:3.2.2.20]	K01246
2689	KAG6411338.1	85.507	69	10	0	1	69	1353	1421	1.67e-15	80.6	KAG6411338.1	88	59	59	0	85.51	1	1	TGCAGAGAAGAAGTTCAAAATCCAGATGGCAAGCTTGGAGACCGAAAACAAAAGGCAGAGACGTCAATA	TGCAGAGAAGAAACTCAAACTCCAGATAGCAAGCTTGGAGATGGAAAGCAAAAGGCAAGCACGTCAATA	69	2475	KAG6411338.1	Hypothetical protein	Uncharacterized protein
2689	KAG6413961.1	85.507	69	10	0	1	69	1353	1421	1.67e-15	80.6	KAG6413961.1	88	59	59	0	85.51	1	1	TGCAGAGAAGAAGTTCAAAATCCAGATGGCAAGCTTGGAGACCGAAAACAAAAGGCAGAGACGTCAATA	TGCAGAGAAGAAACTCAAACTCCAGATAGCAAGCTTGGAGATGGAAAGCAAAAGGAAGGCACGTCAATA	69	2463	KAG6413961.1	Hypothetical protein	Uncharacterized protein
2692	KAG6425727.1	85.714	56	8	0	3	58	464	519	3.67e-11	66.2	KAG6425727.1	72	48	48	0	85.71	1	1	CAGAGAAGACTGCCACGGTAAATAAAATTTCTGAAGAAGAGAGGGCTATCCTTGAG	CAGAGGAGGCTGCCACTGTCAATAAAATTTCTGAAGAAGAGAGATCATTCCTTGAG	69	1161	KAG6425727.1	Hypothetical protein	Uncharacterized protein
2696	KAG6434459.1	91.304	69	6	0	1	69	984	1052	6.21e-21	98.7	KAG6434459.1	108	63	63	0	91.3	1	1	TGCAGAGAAGAGTACTGGGAGTGGTGGCAAGAAGAAGGGGGCGGCTCAGTTACGTGTCTATAATTTGGG	TGCAGAGAAGAGTACTGGCAGCGGTGGCAAGAAGAAGGGGCCGGCTCAGTTGCGCGTTTATAATTTGGG	69	1296	KAG6434459.1	UDP-glucuronate 4-epimerase [EC:5.1.3.6]	K08679
2696	KAG6437795.1	89.855	69	7	0	1	69	984	1052	2.64e-19	94.2	KAG6437795.1	103	62	62	0	89.86	1	1	TGCAGAGAAGAGTACTGGGAGTGGTGGCAAGAAGAAGGGGGCGGCTCAGTTACGTGTCTATAATTTGGG	TGCAGAGAAGAGTACTGGCAGCGGTGGCAAGAAGACGGGGCCGGCTCAATTACGCGTTTATAATTTGGG	69	1296	KAG6437795.1	UDP-glucuronate 4-epimerase [EC:5.1.3.6]	K08679
2696	KAG6400478.1	88.235	68	8	0	2	69	982	1049	1.12e-17	87.8	KAG6400478.1	96	60	60	0	88.24	1	1	GCAGAGAAGAGTACTGGGAGTGGTGGCAAGAAGAAGGGGGCGGCTCAGTTACGTGTCTATAATTTGGG	GCAGAGAAGAGTACTGGCAGTGGTGGCAAGAAGAAGGGGAAAGCTCAATTGCGCGTTTATAATTTGGG	69	1419	KAG6400478.1	UDP-glucuronate 4-epimerase [EC:5.1.3.6]	K08679
2701	KAG6417352.1	90.625	64	6	0	6	69	3278	3215	3.22e-18	89.7	KAG6417352.1	98	58	58	0	90.62	1	-1	AGAAGCTCCATCAAAGTTACTCCATAGCTGTATACATCACATTTATCAGTCAACTTTGTTGAGT	AGAAGCTCCAGCAGAATTACCCCATAGCTGTATACATCACATTTATCCGTCAACTTTGATGAGT	69	3534	KAG6417352.1	Hypothetical protein	Uncharacterized protein
2701	KAG6433052.1	85.507	69	10	0	1	69	3115	3047	1.67e-15	80.6	KAG6433052.1	88	59	59	0	85.51	1	-1	TGCAGAGAAGCTCCATCAAAGTTACTCCATAGCTGTATACATCACATTTATCAGTCAACTTTGTTGAGT	TGCACACAAGCTCCAGCACAATTATTCCATAGCTGTATACATCACATTTTTCCGTCAACCTTGTTGCGT	69	3378	KAG6433052.1	Hypothetical protein	Uncharacterized protein
2701	KAG6433053.1	84.058	69	11	0	1	69	3025	2957	7.08e-14	76.1	KAG6433053.1	83	58	58	0	84.06	1	-1	TGCAGAGAAGCTCCATCAAAGTTACTCCATAGCTGTATACATCACATTTATCAGTCAACTTTGTTGAGT	TGCACACAAGCTCCAGTAGAATTATTCCATAGCTGTACACATCACATTTATCCGTCAACCTTGTTGCGT	69	3483	KAG6433053.1	Hypothetical protein	Uncharacterized protein
2703	KAG6415116.1	87.302	63	8	0	1	63	1212	1274	5.82e-15	78.8	KAG6415116.1	86	55	55	0	87.3	1	1	TGCAGAGAAGGAATTGATCATCTCCGGGACTATACAGAGAGTGCTTGATCTATTTTTTGAGTA	TGCAGAGAAGGAATTGGTAGTCTCTGGGACTATTCAGAGAGTAATTGATCTGTTTTTTGAGTA	69	3678	KAG6415116.1	serine/threonine-protein phosphatase 6 regulatory subunit 3	K15501
2703	KAG6417637.1	87.302	63	8	0	1	63	1329	1391	5.82e-15	78.8	KAG6417637.1	86	55	55	0	87.3	1	1	TGCAGAGAAGGAATTGATCATCTCCGGGACTATACAGAGAGTGCTTGATCTATTTTTTGAGTA	TGCAGAGAAGGAATTGGTAGTCTCTGGGACTATTCAGAGAGTAATTGATCTGTTTTTTGAGTA	69	3738	KAG6417637.1	Hypothetical protein	Uncharacterized protein
2703	KAG6415391.1	83.871	62	10	0	2	63	3619	3680	1.05e-11	68	KAG6415391.1	74	52	52	0	83.87	1	1	GCAGAGAAGGAATTGATCATCTCCGGGACTATACAGAGAGTGCTTGATCTATTTTTTGAGTA	GCAGAGAAGGAATTGGTCAGCTCTGGGGCAATTCACAGAGTCCTTGATCTCTTTTTCGAGTA	69	5133	KAG6415391.1	homeobox-leucine zipper protein	K09338
2704	KAG6415116.1	87.302	63	8	0	1	63	1212	1274	5.82e-15	78.8	KAG6415116.1	86	55	55	0	87.3	1	1	TGCAGAGAAGGAATTGATCATCTCCGGGACTATACAGAGAGTGCTTGATCTATTTTTTGAGTA	TGCAGAGAAGGAATTGGTAGTCTCTGGGACTATTCAGAGAGTAATTGATCTGTTTTTTGAGTA	69	3678	KAG6415116.1	serine/threonine-protein phosphatase 6 regulatory subunit 3	K15501
2704	KAG6417637.1	87.302	63	8	0	1	63	1329	1391	5.82e-15	78.8	KAG6417637.1	86	55	55	0	87.3	1	1	TGCAGAGAAGGAATTGATCATCTCCGGGACTATACAGAGAGTGCTTGATCTATTTTTTGAGTA	TGCAGAGAAGGAATTGGTAGTCTCTGGGACTATTCAGAGAGTAATTGATCTGTTTTTTGAGTA	69	3738	KAG6417637.1	Hypothetical protein	Uncharacterized protein
2704	KAG6415391.1	83.871	62	10	0	2	63	3619	3680	1.05e-11	68	KAG6415391.1	74	52	52	0	83.87	1	1	GCAGAGAAGGAATTGATCATCTCCGGGACTATACAGAGAGTGCTTGATCTATTTTTTGAGTA	GCAGAGAAGGAATTGGTCAGCTCTGGGGCAATTCACAGAGTCCTTGATCTCTTTTTCGAGTA	69	5133	KAG6415391.1	homeobox-leucine zipper protein	K09338
2708	KAG6404660.1	93.478	46	3	0	1	46	1119	1164	3.01e-12	70.7	KAG6404660.1	77	43	43	0	93.48	1	1	TGCAGAGAAGGGACTGAAACCTCTACATTTTGACAGGCATCACATC	TGCAGAGAAGGGACTGAAGCCTTTACATTTTGACAGGCATAACATC	69	1440	KAG6404660.1	inositol-1,3,4-trisphosphate 5/6-kinase [EC:2.7.1.159]	K01765
2709	KAG6390832.1	94.203	69	4	0	1	69	113	181	1.2e-23	107	KAG6390832.1	118	65	65	0	94.2	1	1	TGCAGAGAAGGGAGATTTCGTCGAAGCGAGATCGTGCTTTTAGCATGAGTGATGCTCAGGAACGATTCC	TGCAGAGAAGGGAGATTTCCTCAAAGCGTGATCGTGCTTTTAGCATGAGTGATGCTCAGGAGCGATTCC	69	1320	KAG6390832.1	Hypothetical protein	Uncharacterized protein
2709	KAG6416012.1	94.203	69	4	0	1	69	113	181	1.2e-23	107	KAG6416012.1	118	65	65	0	94.2	1	1	TGCAGAGAAGGGAGATTTCGTCGAAGCGAGATCGTGCTTTTAGCATGAGTGATGCTCAGGAACGATTCC	TGCAGAGAAGGGAGATTTCCTCGAAGCGTGACCGTGCTTTTAGCATGAGTGATGCTCAGGAGCGATTCC	69	1431	KAG6416012.1	Hypothetical protein	Uncharacterized protein
2709	KAG6416013.1	94.203	69	4	0	1	69	113	181	1.2e-23	107	KAG6416013.1	118	65	65	0	94.2	1	1	TGCAGAGAAGGGAGATTTCGTCGAAGCGAGATCGTGCTTTTAGCATGAGTGATGCTCAGGAACGATTCC	TGCAGAGAAGGGAGATTTCCTCGAAGCGTGACCGTGCTTTTAGCATGAGTGATGCTCAGGAGCGATTCC	69	1602	KAG6416013.1	Hypothetical protein	Uncharacterized protein
2713	KAG6433485.1	83.607	61	10	0	8	68	1454	1514	3.67e-11	66.2	KAG6433485.1	72	51	51	0	83.61	1	1	AAGGTAGCTCCTATAAAGCACTGAAGCTGCTCAGGGAAATGGCTGGAAAGGGTATGATGCC	AAGATAGCTCCTATAAAGCATTGAAACTGCTCAAAGAAATGTGTGAAAAGGGCATGGTGCC	69	1674	KAG6433485.1	Hypothetical protein	Uncharacterized protein
2721	KAG6433816.1	85.507	69	10	0	1	69	690	758	1.67e-15	80.6	KAG6433816.1	88	59	59	0	85.51	1	1	TGCAGAGAAGTTAGGCAAGACTCCTGCTCTGGTAGCACTACGCTGGGGACTACAAACGGGTCACAGCGT	TGCAGCGAAGTTGGGCAAGACTCCAGCTCAGGTTGCACTCCGTTGGGGACTGCAAATGGGTCATAGCGT	69	2334	KAG6433816.1	alcohol dehydrogenase (NADP+) [EC:1.1.1.2]	K00002
2742	KAG6425856.1	89.855	69	7	0	1	69	1230	1162	2.64e-19	94.2	KAG6425856.1	103	62	62	0	89.86	1	-1	TGCAGAGAATCCTTTTCCCTCATTCAGGGCATTATCAAATGCTTCTTTGAACTTATCCAAAGTTCCAGA	TGCGGAGAATCCTTTTCCCTCGTTTAGGGCATTGTCGAATGCTTCTTTGAACTTATCCAAGGCTCCAGA	69	2403	KAG6425856.1	protein SEY1 [EC:3.6.5.-]	K22698
2742	KAG6428899.1	89.855	69	7	0	1	69	1074	1006	2.64e-19	94.2	KAG6428899.1	103	62	62	0	89.86	1	-1	TGCAGAGAATCCTTTTCCCTCATTCAGGGCATTATCAAATGCTTCTTTGAACTTATCCAAAGTTCCAGA	TGCAGAGAATCCTTTTCCCTCGTTTAGGGCATTGTTGAATGCTTCTTTGAACTTATCCAAGGCTCCAGA	69	4047	KAG6428899.1	protein SEY1 [EC:3.6.5.-]	K22698
2742	KAG6415812.1	83.871	62	10	0	8	69	1280	1219	1.05e-11	68	KAG6415812.1	74	52	52	0	83.87	1	-1	AATCCTTTTCCCTCATTCAGGGCATTATCAAATGCTTCTTTGAACTTATCCAAAGTTCCAGA	AATCCTTTACCCTCATTCAAGGTATTATCAAGTGCTTCTTTGAATCTGTCCAAGGTCTCAGA	69	2595	KAG6415812.1	protein SEY1 [EC:3.6.5.-]	K22698
2743	KAG6428164.1	91.304	69	6	0	1	69	251	319	6.21e-21	98.7	KAG6428164.1	108	63	63	0	91.3	1	1	TGCAGAGAATCGAGAAATCGCGGAAGGACGAGGCGAGAAAAGAGGCGCTGCGAATCGCCAACGAAGAGA	TGCAGAGAATCGAGAAATTACGGAAGGACACGGCGAGAAACGAGGCGCTGCGGATCGCCAACGAAGAGA	69	582	KAG6428164.1	Hypothetical protein	Uncharacterized protein
2743	KAG6431212.1	91.304	69	6	0	1	69	269	337	6.21e-21	98.7	KAG6431212.1	108	63	63	0	91.3	1	1	TGCAGAGAATCGAGAAATCGCGGAAGGACGAGGCGAGAAAAGAGGCGCTGCGAATCGCCAACGAAGAGA	TGCAGAGAATCGAGAAATTACGGAAGGATACGGCGAGAAAAGAGGCGCTGCGGATCGCCAACGAAGAGA	69	600	KAG6431212.1	Hypothetical protein	Uncharacterized protein
2743	KAG6432105.1	86.957	69	9	0	1	69	155	223	1.37e-16	85.1	KAG6432105.1	93	60	60	0	86.96	1	1	TGCAGAGAATCGAGAAATCGCGGAAGGACGAGGCGAGAAAAGAGGCGCTGCGAATCGCCAACGAAGAGA	TGCAGAGGATCGAGAAATTGCGGAAGGACACGGCCAGAAAAGAGGCGCTGAGGATTGCAAACGAAGAGA	69	489	KAG6432105.1	Hypothetical protein	Uncharacterized protein
2744	KAG6427869.1	88.406	69	8	0	1	69	233	165	3.22e-18	89.7	KAG6427869.1	98	61	61	0	88.41	1	-1	TGCAGAGAATCTGCGGCGATGAAATGGTAGTTCATGGCGTAGATGTTGTTGGTGGAGATGAAGTGGAAG	TGGAGGGAGTCGGCCGCGATGAAGTGGTAGTTCATCGCGTAGATGTCGTTGGTGGAGATGAAGTGGAAG	69	1992	KAG6427869.1	auxin efflux carrier family protein	K13947
2744	KAG6430911.1	88.235	68	8	0	1	68	233	166	1.12e-17	87.8	KAG6430911.1	96	60	60	0	88.24	1	-1	TGCAGAGAATCTGCGGCGATGAAATGGTAGTTCATGGCGTAGATGTTGTTGGTGGAGATGAAGTGGAA	TGGAGGGAGTCGGCCGCGATGAAGTGGTAGTTCATCGCGTAGATGTCGTTGGTGGAGATGAAGTGGAA	69	1923	KAG6430911.1	auxin efflux carrier family protein	K13947
2744	KAG6390659.1	92.727	55	4	0	15	69	232	286	4.77e-16	82.4	KAG6390659.1	90	51	51	0	92.73	1	1	GGCGATGAAATGGTAGTTCATGGCGTAGATGTTGTTGGTGGAGATGAAGTGGAAG	GGCGATGAAGCGGTAGTTCATGGCGTAGGGGTTGTTGGTGGAGATGAAGTGGAAG	69	378	KAG6390659.1	Hypothetical protein	Uncharacterized protein
2749	KAG6404898.1	92.424	66	5	0	1	66	2187	2252	2.17e-20	97.8	KAG6404898.1	107	61	61	0	92.42	1	1	TGCAGAGAATGCTGCTGCCATTATGCAAGAAAGGGGTTTCTCAAATTCTCGAAGATCCCGGCATCG	TGCTGAGAATGCTATTTCCCTTATGCAAGAAAGGGGTTTCTCAAATTCTCGAAGATCCCGGCATCG	69	5310	KAG6404898.1	Hypothetical protein	Uncharacterized protein
2749	KAG6407070.1	90.909	66	6	0	1	66	2226	2291	2.64e-19	93.3	KAG6407070.1	102	60	60	0	90.91	1	1	TGCAGAGAATGCTGCTGCCATTATGCAAGAAAGGGGTTTCTCAAATTCTCGAAGATCCCGGCATCG	TGCTGAGAATGCTATATCCATTATGCGAGAAAGGGGTTTCTCAAATTCTCGAAGATCCCGGCATCG	69	5394	KAG6407070.1	Hypothetical protein	Uncharacterized protein
2751	KAG6432459.1	89.706	68	7	0	1	68	1064	997	9.22e-19	92.4	KAG6432459.1	101	61	61	0	89.71	1	-1	TGCAGAGAATGGGATGTGACTCGATCCGACCCATTTGGCATTAGCAAAACTGTGAACTTGATGTGAGC	TGCAGTGGATGAGACGTGACCCGATCGGACCCATTTGGCATTAGCAAAACCGTGAACTTGATGTGAGC	69	1245	KAG6432459.1	Hypothetical protein	Uncharacterized protein
2751	KAG6435774.1	88.235	68	8	0	1	68	1112	1045	1.12e-17	87.8	KAG6435774.1	96	60	60	0	88.24	1	-1	TGCAGAGAATGGGATGTGACTCGATCCGACCCATTTGGCATTAGCAAAACTGTGAACTTGATGTGAGC	TGCAGTGGATGAGACGTGACCCGGTCGGACCCATTTGGCATTAGCAAAACCGTGAACTTGATGTGAGC	69	1293	KAG6435774.1	Hypothetical protein	Uncharacterized protein
2751	KAG6433758.1	86.765	68	9	0	1	68	1034	967	4.77e-16	83.3	KAG6433758.1	91	59	59	0	86.76	1	-1	TGCAGAGAATGGGATGTGACTCGATCCGACCCATTTGGCATTAGCAAAACTGTGAACTTGATGTGAGC	TGTAGAGCATGTGAGGTGACTCGATCTGACCCATTTGGCAGAAGCAAAACAGTGAACTTGATGTGTGC	69	1215	KAG6433758.1	Hypothetical protein	Uncharacterized protein
2752	KAG6422897.1	92.754	69	5	0	1	69	336	404	5.1e-22	103	KAG6422897.1	113	64	64	0	92.75	1	1	TGCAGAGAATGGGCATGTCTTGGTTGTAGGGGAGTTGTTGAAGCATTCAGATGCTGAGACTGCTGCAAT	TGCGGAGAATGGGCATGTCTTGGTTGTGGGGGAGTTCTTGAAGCATTCGGATGCTGAGACTTCTGCAAT	69	2145	KAG6422897.1	Hypothetical protein	Uncharacterized protein
2752	KAG6419907.1	91.304	69	6	0	1	69	336	404	6.21e-21	98.7	KAG6419907.1	108	63	63	0	91.3	1	1	TGCAGAGAATGGGCATGTCTTGGTTGTAGGGGAGTTGTTGAAGCATTCAGATGCTGAGACTGCTGCAAT	TGCGGAGAATGGGCATGTCTTGGTTGTGGGGGAATTCTTGAAGCATTCGGATGCTGAGACTTCTGCAAT	69	1728	KAG6419907.1	Hypothetical protein	Uncharacterized protein
2760	KAG6412023.1	97.674	43	1	0	2	44	280	322	2.47e-13	74.3	KAG6412023.1	81	42	42	0	97.67	1	1	GCAGAGAATTGCCAGAAGAGCAAGATTTTCTTCATTGCTTGGT	GCAGAGAATTGCCAGAAAAGCAAGATTTTCTTCATTGCTTGGT	69	471	KAG6412023.1	cofilin	K05765
2760	KAG6386348.1	95.349	43	2	0	2	44	280	322	3.01e-12	69.8	KAG6386348.1	76	41	41	0	95.35	1	1	GCAGAGAATTGCCAGAAGAGCAAGATTTTCTTCATTGCTTGGT	GCAGAGAATTGCCAAAAAAGCAAGATTTTCTTCATTGCTTGGT	69	471	KAG6386348.1	cofilin	K05765
2760	KAG6401490.1	93.182	44	3	0	1	44	282	325	3.67e-11	67.1	KAG6401490.1	73	41	41	0	93.18	1	1	TGCAGAGAATTGCCAGAAGAGCAAGATTTTCTTCATTGCTTGGT	TGCAGAAAATTGCCAGAAAAGCAAGATTTTCTTTATTGCTTGGT	69	474	KAG6401490.1	cofilin	K05765
2761	KAG6434680.1	88.889	63	7	0	7	69	903	841	4.77e-16	83.3	KAG6434680.1	91	56	56	0	88.89	1	-1	GAATTTATTCTTCATTTCCTCAACGGTGGCAGTCTCCCACTGAGGGACCCTTCCTTGTGGATC	GAATTTATTCTTTATTTCCTCAACAGAGGCTTTCTCCCATTGAGGGACCCTTCCTTCTGGATC	69	1176	KAG6434680.1	L-ascorbate peroxidase [EC:1.11.1.11]	K00434
2761	KAG6438039.1	88.889	63	7	0	7	69	609	547	4.77e-16	83.3	KAG6438039.1	91	56	56	0	88.89	1	-1	GAATTTATTCTTCATTTCCTCAACGGTGGCAGTCTCCCACTGAGGGACCCTTCCTTGTGGATC	GAATTTATTCTTTATTTCCTCAACAGAGGCTTTCTCCCATTGAGGGACCCTTCCTTCTGGATC	69	882	KAG6438039.1	L-ascorbate peroxidase [EC:1.11.1.11]	K00434
2766	KAG6423424.1	83.077	65	11	0	3	67	163	99	1.05e-11	68.9	KAG6423424.1	75	54	54	0	83.08	1	-1	CAGAGACAACAAATGCAGCACTGACCCGAGATCTTTTGCGAGGCAAACAGTAGAGATCCACAAGG	CAGAGACGACAAACGGAGCACAGACTCTAGATCTTTTGTGAGGCAAAAGATAAAGATCCACAAGG	69	2148	KAG6423424.1	EIN3-binding F-box protein	K14515
2767	KAG6422942.1	82.353	68	12	0	1	68	1513	1580	3.01e-12	69.8	KAG6422942.1	76	56	56	0	82.35	1	1	TGCAGAGACAAGCTGCCTCATTACATGGCTCCAAGAACAGTTGTGTTCCAAGATCTGCCCAAGACTTC	TGCCGTGAGAGGCTGCCTCATTACATGGCTCCACGGACAGTGGTGTTCGAGGAATTGCCAAAGACTTC	69	1659	KAG6422942.1	Hypothetical protein	Uncharacterized protein
2768	KAG6422942.1	81.159	69	13	0	1	69	1513	1581	3.67e-11	67.1	KAG6422942.1	73	56	56	0	81.16	1	1	TGCAGAGACAAGCTGCCTCATTACATGGCTCCGAGAACAGTTGTGTTCCAAGATTTGCCCAAGACGTCG	TGCCGTGAGAGGCTGCCTCATTACATGGCTCCACGGACAGTGGTGTTCGAGGAATTGCCAAAGACTTCG	69	1659	KAG6422942.1	Hypothetical protein	Uncharacterized protein
2769	KAG6433240.1	86.957	69	9	0	1	69	72	4	1.37e-16	85.1	KAG6433240.1	93	60	60	0	86.96	1	-1	TGCAGAGACACACTGTGCGATCCTTAGTATCAGCCCACTTTTTCTCCCTGGACTCCCAAACAGCTCCTT	TGCTGACACACACTGCCCAATCCTCAATATCAGCCCACTTTTTCTCCCTGGGCTTCCAAACAGCTCCTT	69	465	KAG6433240.1	Hypothetical protein	Uncharacterized protein
2776	KAG6415762.1	88.406	69	8	0	1	69	1315	1247	3.22e-18	89.7	KAG6415762.1	98	61	61	0	88.41	1	-1	TGCAGAGACAGGAAAGTCTGAAGCCTTCCCCAATAAGCCTCAGGAAACCCATAATATCAGAGGCGCCAT	TGCAAAGACAGGAAAGTCTGAAGCCTTCCCCAAGAAGCCTTAGGAGACCGAGAATAACAGAAGCGCCAT	69	2268	KAG6415762.1	anaphase-promoting complex subunit 3	K03350
2776	KAG6388390.1	85.507	69	10	0	1	69	1789	1721	1.67e-15	80.6	KAG6388390.1	88	59	59	0	85.51	1	-1	TGCAGAGACAGGAAAGTCTGAAGCCTTCCCCAATAAGCCTCAGGAAACCCATAATATCAGAGGCGCCAT	TGCAAAGACGTGAGAGTCTGAAGCCTTCCCCAAGAAGCCTTAGGAGACCCAGAATATCAGAAGCACCAT	69	2742	KAG6388390.1	anaphase-promoting complex subunit 3	K03350
2776	KAG6390736.1	85.507	69	10	0	1	69	1456	1388	1.67e-15	80.6	KAG6390736.1	88	59	59	0	85.51	1	-1	TGCAGAGACAGGAAAGTCTGAAGCCTTCCCCAATAAGCCTCAGGAAACCCATAATATCAGAGGCGCCAT	TGCAAAGACATGAGAGTCTGAAGCCTTCCCCAAGAAGTCTTAGGAGACCCAGAATATCAGAAGCACCAT	69	2409	KAG6390736.1	anaphase-promoting complex subunit 3	K03350
2779	KAG6388737.1	84.058	69	11	0	1	69	1410	1478	7.08e-14	76.1	KAG6388737.1	83	58	58	0	84.06	1	1	TGCAGAGACATCTGGAGAAAATTGTAAGGAAGGCCATGCCACTACAAGCCCTTGTGTTTTGGATAATGG	TGCAGAGACAACTGTAGAAAATTGTAAAGAAGGCCATGCTTCTGACACTCCTTGTGTTTTGGAGAATGG	69	1818	KAG6388737.1	Hypothetical protein	Uncharacterized protein
2779	KAG6390355.1	82.609	69	12	0	1	69	1410	1478	8.63e-13	71.6	KAG6390355.1	78	57	57	0	82.61	1	1	TGCAGAGACATCTGGAGAAAATTGTAAGGAAGGCCATGCCACTACAAGCCCTTGTGTTTTGGATAATGG	TGCAGAGACAACTCTAGAAAATTGTAAAGAAGGCCATGCTTCTGACACTCCTTGTGTTTTGGAGAATGG	69	1818	KAG6390355.1	Hypothetical protein	Uncharacterized protein
2779	KAG6432663.1	80.556	72	11	1	1	69	1557	1628	3.67e-11	66.2	KAG6432663.1	72	58	58	3	80.56	1	1	TGCAGAGACATCTGGAGAAAATTGTAAGGAAGGCCATGCCACTACAAGC---CCTTGTGTTTTGGATAATGG	TGCAAAGACATCTGTAGAAAATTATAAAGAAGGCTATGCTGCTACTACCACTCCTTGTGTTTTAGAGAATGG	69	1974	KAG6432663.1	Hypothetical protein	Uncharacterized protein
2783	KAG6409151.1	91.176	68	6	0	1	68	633	700	2.17e-20	96.9	KAG6409151.1	106	62	62	0	91.18	1	1	TGCAGAGACCAAAGATCTGTTTGACAAGCTAACTGAAGATGCTATGAAGTTGATGGAGAATGGAGATT	TGCAGAGACCAAAAATCTGTTTGACCAGCTAACTGAAGATGCCATGAAACTGATGGAGAATGGCGATT	69	1221	KAG6409151.1	Hypothetical protein	Uncharacterized protein
2783	KAG6409155.1	91.176	68	6	0	1	68	636	703	2.17e-20	96.9	KAG6409155.1	106	62	62	0	91.18	1	1	TGCAGAGACCAAAGATCTGTTTGACAAGCTAACTGAAGATGCTATGAAGTTGATGGAGAATGGAGATT	TGCAGAGACCAAAAATCTGTTTGACCAGCTAACTGAAGATGCCATGAAACTGATGGAGAATGGCGATT	69	1113	KAG6409155.1	CD2 antigen cytoplasmic tail-binding protein 2	K13099
2795	KAG6428511.1	88.406	69	8	0	1	69	1155	1223	3.22e-18	89.7	KAG6428511.1	98	61	61	0	88.41	1	1	TGCAGAGACGGAGATCATGACTAGCGTGCGTAAAGCTCGGTTCCGGTGCTGTATGAGTCAACCAATGAC	TGCAGAGACGGGGATCATGACTACTGTGAGAAAAGCTCGTTTCAGGTGCTGTATGAGTCAACCGATGAC	69	1233	KAG6428511.1	Hypothetical protein	Uncharacterized protein
2795	KAG6431599.1	88.406	69	8	0	1	69	1155	1223	3.22e-18	89.7	KAG6431599.1	98	61	61	0	88.41	1	1	TGCAGAGACGGAGATCATGACTAGCGTGCGTAAAGCTCGGTTCCGGTGCTGTATGAGTCAACCAATGAC	TGCAGAGACGGAGATCATGACTACTGTGAGGAAAGCTCGTTTCAGGTGCTGTATGAGCCAACCGATGAC	69	1233	KAG6431599.1	Hypothetical protein	Uncharacterized protein
2795	KAG6414265.1	86.957	69	9	0	1	69	1152	1220	1.37e-16	85.1	KAG6414265.1	93	60	60	0	86.96	1	1	TGCAGAGACGGAGATCATGACTAGCGTGCGTAAAGCTCGGTTCCGGTGCTGTATGAGTCAACCAATGAC	TGCCGAGACTGAGATCATGACTACTGTGAGAAAAGCTCGTTTCAGGTGCTGTATGAGTCAACCGATGAC	69	1230	KAG6414265.1	Hypothetical protein	Uncharacterized protein
2796	KAG6428511.1	88.406	69	8	0	1	69	1155	1223	3.22e-18	89.7	KAG6428511.1	98	61	61	0	88.41	1	1	TGCAGAGACGGAGATCATGACTAGCGTGCGTAAAGCTCGGTTCCGGTGCTGTATGAGTCAACCAATGAC	TGCAGAGACGGGGATCATGACTACTGTGAGAAAAGCTCGTTTCAGGTGCTGTATGAGTCAACCGATGAC	69	1233	KAG6428511.1	Hypothetical protein	Uncharacterized protein
2796	KAG6431599.1	88.406	69	8	0	1	69	1155	1223	3.22e-18	89.7	KAG6431599.1	98	61	61	0	88.41	1	1	TGCAGAGACGGAGATCATGACTAGCGTGCGTAAAGCTCGGTTCCGGTGCTGTATGAGTCAACCAATGAC	TGCAGAGACGGAGATCATGACTACTGTGAGGAAAGCTCGTTTCAGGTGCTGTATGAGCCAACCGATGAC	69	1233	KAG6431599.1	Hypothetical protein	Uncharacterized protein
2796	KAG6414265.1	86.957	69	9	0	1	69	1152	1220	1.37e-16	85.1	KAG6414265.1	93	60	60	0	86.96	1	1	TGCAGAGACGGAGATCATGACTAGCGTGCGTAAAGCTCGGTTCCGGTGCTGTATGAGTCAACCAATGAC	TGCCGAGACTGAGATCATGACTACTGTGAGAAAAGCTCGTTTCAGGTGCTGTATGAGTCAACCGATGAC	69	1230	KAG6414265.1	Hypothetical protein	Uncharacterized protein
2801	KAG6389704.1	87.879	66	8	0	1	66	1803	1738	1.37e-16	84.2	KAG6389704.1	92	58	58	0	87.88	1	-1	TGCAGAGACTAACACAGGAGAAGACCAGAAGAGGAAGGAGTTGTACGCTTTACGAAGCTGCACAGC	TGCAGAGACTAAAACAGGAGAAGACCAGAAAAGGTAGGAATTGTATGCTTTACTCAGCTGAACAGC	69	4473	KAG6389704.1	ATP-binding cassette, subfamily C (CFTR/MRP), member 2	K05666
2802	KAG6389704.1	86.364	66	9	0	1	66	1803	1738	5.82e-15	79.7	KAG6389704.1	87	57	57	0	86.36	1	-1	TGCAGAGACTAATACAGGAGAAGCCCAGAAGAGGAAGGAGTTGTACGCTTTACGGAGCTGCACAGC	TGCAGAGACTAAAACAGGAGAAGACCAGAAAAGGTAGGAATTGTATGCTTTACTCAGCTGAACAGC	69	4473	KAG6389704.1	ATP-binding cassette, subfamily C (CFTR/MRP), member 2	K05666
2804	KAG6388657.1	82.812	64	11	0	6	69	4040	3977	3.67e-11	67.1	KAG6388657.1	73	53	53	0	82.81	1	-1	AGACTATGAAGAGGATTGTCTTCGAGTTCAGCCAGCACAGCTGCCTTTGTGTTGCTGTTTGAAG	AGGCTATGAACAGGATTTCCTTCCACTTCAGCCAGCATAGATGTCTTTGTGTTGCTATCTGAAG	69	7017	KAG6388657.1	Hypothetical protein	Uncharacterized protein
2805	KAG6426498.1	85.507	69	10	0	1	69	723	791	1.67e-15	80.6	KAG6426498.1	88	59	59	0	85.51	1	1	TGCAGAGACTATGGATTGCAATCTCCGGCTACTGCACCAGATGATGCAGATGTTTGTGCTGTTTGCCTC	TGCAGAGACTATGGATTGCAGTCCTCAGCTACTGGGTCAGATGATACAGATATCTGTGCTGTTTGCCTC	69	843	KAG6426498.1	Hypothetical protein	Uncharacterized protein
2805	KAG6382668.1	84.848	66	10	0	4	69	829	894	7.08e-14	75.2	KAG6382668.1	82	56	56	0	84.85	1	1	AGAGACTATGGATTGCAATCTCCGGCTACTGCACCAGATGATGCAGATGTTTGTGCTGTTTGCCTC	AGAGACTATGGATTGCAGTCCTCAGCTACTGGGTCAGATGATACAGATATCTGTGCTGTTTGCCTC	69	1269	KAG6382668.1	E3 ubiquitin-protein ligase XBAT32/33 [EC:2.3.2.27]	K19044
2805	KAG6429519.1	83.333	66	11	0	4	69	892	957	3.01e-12	70.7	KAG6429519.1	77	55	55	0	83.33	1	1	AGAGACTATGGATTGCAATCTCCGGCTACTGCACCAGATGATGCAGATGTTTGTGCTGTTTGCCTC	AGAGACTATGGATTGCAGTCCTCAGCTACTGGGTCAGATGATACGGATATCTGTGCTGTTTGCCTC	69	1557	KAG6429519.1	E3 ubiquitin-protein ligase XBAT32/33 [EC:2.3.2.27]	K19044
2806	KAG6427532.1	89.394	66	7	0	4	69	594	659	1.12e-17	88.7	KAG6427532.1	97	59	59	0	89.39	1	1	AGAGACTCGAGCATGCTTGAATGGCCATCGGTTCTTGAATTTTCTTCTTGCTTGTATGGTGTTTGC	AGAAACTCGAACTTGCTTAAATGGTCATCGCTTCTTAAATTTTCTTCTTGCTTGTATGGTGTTTGC	69	702	KAG6427532.1	Hypothetical protein	Uncharacterized protein
2806	KAG6433835.1	86.957	69	9	0	1	69	465	533	1.37e-16	85.1	KAG6433835.1	93	60	60	0	86.96	1	1	TGCAGAGACTCGAGCATGCTTGAATGGCCATCGGTTCTTGAATTTTCTTCTTGCTTGTATGGTGTTTGC	TGTAGAGACTCGAACTTGCTTAAATGGTCATCGCTTCTTAAATTTTCTTCTGGCTTGCATGGTGTTTGC	69	576	KAG6433835.1	Hypothetical protein	Uncharacterized protein
2806	KAG6437144.1	87.5	64	8	0	6	69	467	530	1.67e-15	80.6	KAG6437144.1	88	56	56	0	87.5	1	1	AGACTCGAGCATGCTTGAATGGCCATCGGTTCTTGAATTTTCTTCTTGCTTGTATGGTGTTTGC	AGACTCGAACTTGCTTAAATGGTCATCGCTTCTTAAATTTTCTTCTGGCTTGCATGGTGTTTGC	69	573	KAG6437144.1	Hypothetical protein	Uncharacterized protein
2814	KAG6388761.1	93.651	63	4	0	1	63	2097	2035	2.17e-20	96.9	KAG6388761.1	106	59	59	0	93.65	1	-1	TGCAGAGACTTCGAAGTTCCTCTTCCCGCTCACAATCTCAAGCAACACCATTCCATAACTGTA	TGCAGAGACTTCGAAGTTCCTCTTCCCGCTCACGATCTCGAGCAACACCATTCCGTAGCTGTA	69	2526	KAG6388761.1	Hypothetical protein	Uncharacterized protein
2814	KAG6390327.1	93.651	63	4	0	1	63	2100	2038	2.17e-20	96.9	KAG6390327.1	106	59	59	0	93.65	1	-1	TGCAGAGACTTCGAAGTTCCTCTTCCCGCTCACAATCTCAAGCAACACCATTCCATAACTGTA	TGCAGAGACTTCGAAGTTCCTCTTCCCGCTCACGATCTCGAGCAACACCATTCCGTAGCTGTA	69	2532	KAG6390327.1	Hypothetical protein	Uncharacterized protein
2814	KAG6390328.1	93.651	63	4	0	1	63	1587	1525	2.17e-20	96.9	KAG6390328.1	106	59	59	0	93.65	1	-1	TGCAGAGACTTCGAAGTTCCTCTTCCCGCTCACAATCTCAAGCAACACCATTCCATAACTGTA	TGCAGAGACTTCGAAGTTCCTCTTCCCGCTCACGATCTCGAGCAACACCATTCCGTAGCTGTA	69	2019	KAG6390328.1	Hypothetical protein	Uncharacterized protein
2816	KAG6386395.1	86.885	61	8	0	9	69	1195	1135	7.08e-14	75.2	KAG6386395.1	82	53	53	0	86.89	1	-1	CTTGTGCTACAACACCGTGGTTGCAGAGTTCATCAAGCTTCTCAGGTGAATAAGCAAATGC	CTTGTGTAACAAGACCATGGTTGCAGAGTTCATCAAGCTTTTCTGGTGATGAAGCAAATGC	69	5544	KAG6386395.1	E3 ubiquitin-protein ligase TRIP12 [EC:2.3.2.26]	K10590
2816	KAG6411974.1	86.885	61	8	0	9	69	1186	1126	7.08e-14	75.2	KAG6411974.1	82	53	53	0	86.89	1	-1	CTTGTGCTACAACACCGTGGTTGCAGAGTTCATCAAGCTTCTCAGGTGAATAAGCAAATGC	CTTGTGTAACAAGACCATGGTTGCAGAGTTCATCAAGCTTTTCTGGTGATGAAGCAAATGC	69	5475	KAG6411974.1	E3 ubiquitin-protein ligase TRIP12 [EC:2.3.2.26]	K10590
2839	KAG6433256.1	86.207	58	8	0	8	65	1701	1758	3.01e-12	69.8	KAG6433256.1	76	50	50	0	86.21	1	1	AGAGGGGTTTCGAATCAGAGCTGTGATCAGCAGCCAGATGGATATTCTTAGAGGCCCT	AGAGGGGTTCCGAGTGAAAGGTGTGATTAGCAGCCAGATGGATAGTCTTAGGGGCCCT	69	1839	KAG6433256.1	Hypothetical protein	Uncharacterized protein
2845	KAG6399678.1	94.03	67	4	0	3	69	517	583	1.46e-22	104	KAG6399678.1	114	63	63	0	94.03	1	1	CAGAGAGATGATGGAGATGAAGAACTATGCAGTGTGTTTGTCCCAACAAACCACTTGTACATTGGTG	CAGAGAGATGACGGAGATGAAGAACTATGCAGTGTTTTTGTCCCTACCAACCACTTGTACATTGGTG	69	858	KAG6399678.1	Hypothetical protein	Uncharacterized protein
2845	KAG6392783.1	92.537	67	5	0	3	69	745	811	6.21e-21	99.6	KAG6392783.1	109	62	62	0	92.54	1	1	CAGAGAGATGATGGAGATGAAGAACTATGCAGTGTGTTTGTCCCAACAAACCACTTGTACATTGGTG	CAGAGAGATGATGGAGACGAAGAATTATGCAGTGTTTTTGTCCCTACAAACCACTTGTACATCGGTG	69	984	KAG6392783.1	Hypothetical protein	Uncharacterized protein
2845	KAG6394552.1	92.537	67	5	0	3	69	553	619	6.21e-21	99.6	KAG6394552.1	109	62	62	0	92.54	1	1	CAGAGAGATGATGGAGATGAAGAACTATGCAGTGTGTTTGTCCCAACAAACCACTTGTACATTGGTG	CAGAGAGATGATGGAGACGAAGAATTATGCAGTGTTTTTGTCCCTACAAACCACTTGTACATCGGTG	69	792	KAG6394552.1	Hypothetical protein	Uncharacterized protein
2846	KAG6399678.1	94.03	67	4	0	3	69	517	583	1.46e-22	104	KAG6399678.1	114	63	63	0	94.03	1	1	CAGAGAGATGATGGAGATGAAGAACTATGCAGTGTGTTTGTCCCAACAAACCACTTGTACATTGGTG	CAGAGAGATGACGGAGATGAAGAACTATGCAGTGTTTTTGTCCCTACCAACCACTTGTACATTGGTG	69	858	KAG6399678.1	Hypothetical protein	Uncharacterized protein
2846	KAG6392783.1	92.537	67	5	0	3	69	745	811	6.21e-21	99.6	KAG6392783.1	109	62	62	0	92.54	1	1	CAGAGAGATGATGGAGATGAAGAACTATGCAGTGTGTTTGTCCCAACAAACCACTTGTACATTGGTG	CAGAGAGATGATGGAGACGAAGAATTATGCAGTGTTTTTGTCCCTACAAACCACTTGTACATCGGTG	69	984	KAG6392783.1	Hypothetical protein	Uncharacterized protein
2846	KAG6394552.1	92.537	67	5	0	3	69	553	619	6.21e-21	99.6	KAG6394552.1	109	62	62	0	92.54	1	1	CAGAGAGATGATGGAGATGAAGAACTATGCAGTGTGTTTGTCCCAACAAACCACTTGTACATTGGTG	CAGAGAGATGATGGAGACGAAGAATTATGCAGTGTTTTTGTCCCTACAAACCACTTGTACATCGGTG	69	792	KAG6394552.1	Hypothetical protein	Uncharacterized protein
2849	KAG6424938.1	85.507	69	10	0	1	69	48	116	1.67e-15	80.6	KAG6424938.1	88	59	59	0	85.51	1	1	TGCAGAGAGCAAAATCTCAACTTCTACGGAATCTGCCCCAAATAATATTGAACGTGATGCACCATCAAA	TGTAGAGACCAAAACGTCAACTTATGCGGAATCTGATCCAAATAATTCTGAACGTGATGCACCATCAAA	69	1818	KAG6424938.1	phosphatidylinositol-3,4,5-trisphosphate 3-phosphatase and dual-specificity protein phosphatase PTEN [EC:3.1.3.16 3.1.3.48 3.1.3.67]	K01110
2849	KAG6421886.1	84.058	69	11	0	1	69	48	116	7.08e-14	76.1	KAG6421886.1	83	58	58	0	84.06	1	1	TGCAGAGAGCAAAATCTCAACTTCTACGGAATCTGCCCCAAATAATATTGAACGTGATGCACCATCAAA	TGTAGAGATCAACATGTCAACTTCTGTGGAATCTGATCCAAATAATTCTGAACGCGATGCACCATCAAA	69	2799	KAG6421886.1	phosphatidylinositol-3,4,5-trisphosphate 3-phosphatase and dual-specificity protein phosphatase PTEN [EC:3.1.3.16 3.1.3.48 3.1.3.67]	K01110
2849	KAG6406601.1	84.746	59	9	0	11	69	55	113	3.67e-11	67.1	KAG6406601.1	73	50	50	0	84.75	1	1	AAAATCTCAACTTCTACGGAATCTGCCCCAAATAATATTGAACGTGATGCACCATCAAA	AAAATGTCAACTGCTGTGGAATCTGATCCAAATAATTCTGAACGTGATGCACCATCGAA	69	1797	KAG6406601.1	phosphatidylinositol-3,4,5-trisphosphate 3-phosphatase and dual-specificity protein phosphatase PTEN [EC:3.1.3.16 3.1.3.48 3.1.3.67]	K01110
2850	KAG6428190.1	88.71	62	7	0	2	63	838	899	1.67e-15	81.5	KAG6428190.1	89	55	55	0	88.71	1	1	GCAGAGAGCAAGTCAGTTTTGGCAGATGTGGAGGTGAAGGTCTTGGGGTTAGATGGGTTGAT	GCAGAGAGCAAGTCAGGCTTAGCAGATGTGGAGGTGAAGGTTTTAGGGTTTGATGGTTTGAT	69	1098	KAG6428190.1	Hypothetical protein	Uncharacterized protein
2850	KAG6431236.1	88.71	62	7	0	2	63	862	923	1.67e-15	81.5	KAG6431236.1	89	55	55	0	88.71	1	1	GCAGAGAGCAAGTCAGTTTTGGCAGATGTGGAGGTGAAGGTCTTGGGGTTAGATGGGTTGAT	GCAGAGAGCAAGTCATGTTTAGCAGATGTGGAGGTGAAGGTTTTAGGGTTTGATGGTTTGAT	69	1143	KAG6431236.1	Hypothetical protein	Uncharacterized protein
2850	KAG6435387.1	85.484	62	9	0	2	63	760	821	8.63e-13	72.5	KAG6435387.1	79	53	53	0	85.48	1	1	GCAGAGAGCAAGTCAGTTTTGGCAGATGTGGAGGTGAAGGTCTTGGGGTTAGATGGGTTGAT	GCGGAGAGCAAGTCATTTTTAGCTGATGTGGAGGTGAAGCTCTTAGGGTTTGATGCTTTGAT	69	1044	KAG6435387.1	Hypothetical protein	Uncharacterized protein
2853	KAG6400209.1	85.075	67	10	0	1	67	1898	1964	2.03e-14	77	KAG6400209.1	84	57	57	0	85.07	1	1	TGCAGAGAGCACTCACCTTTACTGATGCAGAAGTCGAACAAAACGACATTGTCACGGAGATGGGACT	TGCAGCGAGCGCTCACCTATACTGATGCAGAAATCGAACAAAATGAGATCGTGACAGAAATGGGACT	69	2211	KAG6400209.1	Hypothetical protein	Uncharacterized protein
2853	KAG6402421.1	85.075	67	10	0	1	67	2174	2240	2.03e-14	77	KAG6402421.1	84	57	57	0	85.07	1	1	TGCAGAGAGCACTCACCTTTACTGATGCAGAAGTCGAACAAAACGACATTGTCACGGAGATGGGACT	TGCAGCGAGCGCTCACCTATACTGATGCAGAAATCGAACAAAATGAGATCGTGACAGAAATGGGACT	69	2298	KAG6402421.1	Hypothetical protein	Uncharacterized protein
2857	KAG6413388.1	91.837	49	4	0	4	52	335	383	8.63e-13	71.6	KAG6413388.1	78	45	45	0	91.84	1	1	AGAGAGCGACACCTGGAAACATCATCGTTCGTCAAAGGGGTACACGTTT	AGAGAGTGATACCCGGAAACATCATTGTTCGTCAAAGGGGTACACGTTT	69	588	KAG6413388.1	large subunit ribosomal protein L27	K02899
2860	KAG6392727.1	81.159	69	13	0	1	69	551	619	3.67e-11	67.1	KAG6392727.1	73	56	56	0	81.16	1	1	TGCAGAGAGCGGCGAGTAACGCTTGTTCGGGTTGGTGGGCCAGCCACACCCGAACCAAGCAATCCAAAT	TGCAGAGAGCTGCGAACCATGCATATTCATGGTGGTGGGCCAGCCACATTCGCACCAAGCAATCCAAAT	69	3618	KAG6392727.1	Hypothetical protein	Uncharacterized protein
2861	KAG6419780.1	89.706	68	7	0	2	69	79	12	9.22e-19	92.4	KAG6419780.1	101	61	61	0	89.71	1	-1	GCAGAGAGCGGGAGGTAATCGCTGCTCTGTGAAGCCAGCCTGGCGCAGTACCCACCACTCTAAGAGCC	GCCGAGAGCGGGAAGTATTCGCTGCTCTGTGAAACCAGCCTGACGCAGTACCCACCACTCTACGGGCC	69	402	KAG6419780.1	Hypothetical protein	Uncharacterized protein
2861	KAG6419777.1	91.379	58	3	1	6	63	216	161	1.67e-15	80.6	KAG6419777.1	88	53	53	2	91.38	1	-1	AGAGCGGGAGGTAATCGCTGCTCTGTGAAGCCAGCCTGGCGCAGTACCCACCACTCTA	AGAGCGGGAAGTATTCGCTGCTCTGTGA--CCAGCCTGACGCAGTACCCACCACTCTA	69	369	KAG6419777.1	Hypothetical protein	Uncharacterized protein
2861	KAG6419778.1	87.5	64	8	0	6	69	663	600	1.67e-15	80.6	KAG6419778.1	88	56	56	0	87.5	1	-1	AGAGCGGGAGGTAATCGCTGCTCTGTGAAGCCAGCCTGGCGCAGTACCCACCACTCTAAGAGCC	AGAGGGGGAAGTAATCGCTGCTCTGTGAAACCAGCCTGACGCAGTACCGACCTCTCTACGGGCC	69	1020	KAG6419778.1	Hypothetical protein	Uncharacterized protein
2864	KAG6409864.1	89.286	56	6	0	2	57	446	391	7.08e-14	75.2	KAG6409864.1	82	50	50	0	89.29	1	-1	GCAGAGAGCTCATCTTGTGTCATTTGCCTAACTATTCTCATCTGCTGGTTTTTCCT	GCAGAGAGCTCTTCTTGTGTCATTTGACGCACCATTTTCATCTGCTGGTTTTTCCT	69	1023	KAG6409864.1	WRKY transcription factor 22	K13425
2868	KAG6409864.1	89.286	56	6	0	2	57	446	391	7.08e-14	75.2	KAG6409864.1	82	50	50	0	89.29	1	-1	GCAGAGAGCTCTTCTTGTGTCATTTGCCTTACGAGTTTCGTCTGCTGGTTTTTCCT	GCAGAGAGCTCTTCTTGTGTCATTTGACGCACCATTTTCATCTGCTGGTTTTTCCT	69	1023	KAG6409864.1	WRKY transcription factor 22	K13425
2869	KAG6433565.1	85.507	69	10	0	1	69	444	512	1.67e-15	80.6	KAG6433565.1	88	59	59	0	85.51	1	1	TGCAGAGAGCTGCAAACAGTTGGATGAATATCGGCTTCCTGATAGATCACCCCTAATTGATTTTGATTT	TGCAGAGAGCTGCAAGGGTTTGGATGAATACCAGCTTCCGGATAGAGCACCGCTAATTGATTTTGACTT	69	1620	KAG6433565.1	Hypothetical protein	Uncharacterized protein
2870	KAG6438280.1	93.939	66	4	0	4	69	2775	2840	5.1e-22	102	KAG6438280.1	112	62	62	0	93.94	1	1	AGAGAGCTTAGACACCCGAGGTGTCTACGTCTTTGATGATGGTTTCCGGTTTGTCATATGGTTTGG	AGAGAGCTTAGACACCAGAGGTCTCTATATCTTTGATGATGGTTTCCGGTTTGTCATATGGTTTGG	69	3141	KAG6438280.1	protein transport protein SEC24	K14007
2870	KAG6403013.1	88.406	69	8	0	1	69	3159	3227	3.22e-18	89.7	KAG6403013.1	98	61	61	0	88.41	1	1	TGCAGAGAGCTTAGACACCCGAGGTGTCTACGTCTTTGATGATGGTTTCCGGTTTGTCATATGGTTTGG	TGTAGAGAGCTTAGACACCAGAGGTCTCTATATCTTTGATGATGGTTTCCGGTTCGTTGTATGGTTTGG	69	3600	KAG6403013.1	protein transport protein SEC24	K14007
2870	KAG6434934.1	89.394	66	7	0	4	69	2763	2828	1.12e-17	88.7	KAG6434934.1	97	59	59	0	89.39	1	1	AGAGAGCTTAGACACCCGAGGTGTCTACGTCTTTGATGATGGTTTCCGGTTTGTCATATGGTTTGG	AGAGAGCTTAGACACCAGAGGTCTCTATATCTTTGATGATGGTTTCCAATTTGTCGTATGGTTTGG	69	3129	KAG6434934.1	protein transport protein SEC24	K14007
2875	KAG6431038.1	95.652	69	3	0	1	69	662	730	9.84e-25	112	KAG6431038.1	123	66	66	0	95.65	1	1	TGCAGAGAGGAAATCCTCGTTTTTCTCAACTGAGTAGTACCATGTTTGGACTTTTCTATTGCGGTTACC	TGCAGAGGGGAAATCCTCGTTTTTCTCAACTTAGTAGTACCATGTTTGGACTTTTCTATTGCGGCTACC	69	1254	KAG6431038.1	phosphatidate cytidylyltransferase [EC:2.7.7.41]	K00981
2875	KAG6432336.1	94.03	67	4	0	1	67	1520	1586	1.46e-22	104	KAG6432336.1	114	63	63	0	94.03	1	1	TGCAGAGAGGAAATCCTCGTTTTTCTCAACTGAGTAGTACCATGTTTGGACTTTTCTATTGCGGTTA	TGCAGAGGGGAAATCCTCGTTTTTCTCAACTTAGTAGTACCATGTTTGGACTTTTCTATTGTGGCTA	69	2112	KAG6432336.1	phosphatidate cytidylyltransferase [EC:2.7.7.41]	K00981
2875	KAG6428001.1	92.754	69	5	0	1	69	653	721	5.1e-22	103	KAG6428001.1	113	64	64	0	92.75	1	1	TGCAGAGAGGAAATCCTCGTTTTTCTCAACTGAGTAGTACCATGTTTGGACTTTTCTATTGCGGTTACC	TGCAGAGGGGAAACCCTCGTTTTTCTCAACTTAGTAGTACCATGTTTGGACTTTTCTACTGCGGCTACC	69	1245	KAG6428001.1	phosphatidate cytidylyltransferase [EC:2.7.7.41]	K00981
2878	KAG6409686.1	89.796	49	5	0	1	49	546	498	3.67e-11	67.1	KAG6409686.1	73	44	44	0	89.8	1	-1	TGCAGAGAGGAGACCAAAAATGTCTCCAGTGATAGAATGCTTTCTAGTC	TGCAGAGAGCAGACCAAAAATGTCTCCAGTTATAGAGTGCCTTCTAATC	69	981	KAG6409686.1	solute carrier family 35, member F5	K15289
2895	KAG6397009.1	87.037	54	7	0	3	56	310	363	3.67e-11	67.1	KAG6397009.1	73	47	47	0	87.04	1	1	CAGAGAGTCATCACCGCCGTGAAACGCCTCCCGTTCGGCGTGGCGGCTAAGTCG	CAGAGAGTCATCGCCGCCGTGAAACGCCTACCATTCGGCTCGCCGGGTAAGTCG	69	1260	KAG6397009.1	Hypothetical protein	Uncharacterized protein
2896	KAG6397009.1	87.037	54	7	0	3	56	310	363	3.67e-11	67.1	KAG6397009.1	73	47	47	0	87.04	1	1	CAGAGAGTCATCACCGCCGTGAAACGCCTCCCGTTCGGCGTGGCGGCTAAGTCG	CAGAGAGTCATCGCCGCCGTGAAACGCCTACCATTCGGCTCGCCGGGTAAGTCG	69	1260	KAG6397009.1	Hypothetical protein	Uncharacterized protein
2900	KAG6408465.1	93.478	46	3	0	1	46	798	753	3.01e-12	70.7	KAG6408465.1	77	43	43	0	93.48	1	-1	TGCAGAGAGTGCATCAGTGCACACATTGCTGATCAACTGGGAATTA	TGCGGAGAGTGCATCAGTGCATACATTGCTGATCAGCTGGGAATTA	69	1827	KAG6408465.1	diphosphate-dependent phosphofructokinase [EC:2.7.1.90]	K00895
2900	KAG6406164.1	91.304	46	4	0	1	46	927	882	3.67e-11	66.2	KAG6406164.1	72	42	42	0	91.3	1	-1	TGCAGAGAGTGCATCAGTGCACACATTGCTGATCAACTGGGAATTA	TGCGGAGAGTGCATCAGTGCATACATTGCTGATCAGTTGGGAATTA	69	2013	KAG6406164.1	diphosphate-dependent phosphofructokinase [EC:2.7.1.90]	K00895
2901	KAG6428227.1	85.484	62	9	0	2	63	1678	1739	8.63e-13	72.5	KAG6428227.1	79	53	53	0	85.48	1	1	GCAGAGAGTGCCATGGAGGCGTGGGCGTTGCTAGCAAATGCATTAGGCCATCCGACTTTCAT	GCTGAGAGTGCCATGGAGGCCTGGGCTCTGCTTGCAAATGCATTGGGCCATCCAACATTTAT	69	2664	KAG6428227.1	Hypothetical protein	Uncharacterized protein
2901	KAG6431293.1	83.871	62	10	0	2	63	1630	1691	1.05e-11	68	KAG6431293.1	74	52	52	0	83.87	1	1	GCAGAGAGTGCCATGGAGGCGTGGGCGTTGCTAGCAAATGCATTAGGCCATCCGACTTTCAT	GCTGAAAGTGCCATGGAGGCCTGGGCACTGCTTGCAAATGCATTGGGCCATCCAACATTTAT	69	2616	KAG6431293.1	Hypothetical protein	Uncharacterized protein
2902	KAG6396709.1	88.235	68	8	0	1	68	758	825	1.12e-17	87.8	KAG6396709.1	96	60	60	0	88.24	1	1	TGCAGAGAGTGGAGCAGCAGAAGTATCAAGGCCAGATCAAGATGGAAAATGATAACTTCTTTGACTCC	TGCAGAGAGTGGAACAGCAAAAGTATTATGGCCAGATCAAGATGGAAAACGATATCTTCTGCGACTCC	69	837	KAG6396709.1	Hypothetical protein	Uncharacterized protein
2902	KAG6396706.1	88.235	68	8	0	1	68	1091	1158	1.12e-17	87.8	KAG6396706.1	96	60	60	0	88.24	1	1	TGCAGAGAGTGGAGCAGCAGAAGTATCAAGGCCAGATCAAGATGGAAAATGATAACTTCTTTGACTCC	TGCAGAGAGTGGAACAGCAAAAGTATTATGGCCAGATCAAGATGGAAAACGATATCTTCTGCGACTCC	69	1170	KAG6396706.1	Hypothetical protein	Uncharacterized protein
2902	KAG6399006.1	88.235	68	8	0	1	68	1124	1191	1.12e-17	87.8	KAG6399006.1	96	60	60	0	88.24	1	1	TGCAGAGAGTGGAGCAGCAGAAGTATCAAGGCCAGATCAAGATGGAAAATGATAACTTCTTTGACTCC	TGCAGAGAGTGGAACAGCAAAAGTATTATGGACAGATCAAGATGGAAAATGATATCTTCTGCGACTCC	69	1203	KAG6399006.1	Hypothetical protein	Uncharacterized protein
2904	KAG6398352.1	89.855	69	7	0	1	69	1499	1567	2.64e-19	94.2	KAG6398352.1	103	62	62	0	89.86	1	1	TGCAGAGAGTTCAGGGGCCGCAGCTGCTGTTCCTCGATCTCTGCGCTGCGTTTCTTGCTCAGCTTCGTG	TGCAGAGAGTTCAGGGGCCGCAGTTGCTCTTCCTTGATCTCTGCGCAGCTTTTCTCGCCCAGCTTCGTG	69	1575	KAG6398352.1	5'-AMP-activated protein kinase, catalytic alpha subunit [EC:2.7.11.11]	K07198
2904	KAG6396082.1	88.406	69	8	0	1	69	1533	1601	3.22e-18	89.7	KAG6396082.1	98	61	61	0	88.41	1	1	TGCAGAGAGTTCAGGGGCCGCAGCTGCTGTTCCTCGATCTCTGCGCTGCGTTTCTTGCTCAGCTTCGTG	TGCAGAGAGTTCAGGGGCCGCAGTTGCTCTTCCTCGATCTTTGTGCAGCTTTTCTCGCCCAGCTTCGTG	69	1629	KAG6396082.1	5'-AMP-activated protein kinase, catalytic alpha subunit [EC:2.7.11.11]	K07198
2904	KAG6408124.1	88.235	68	8	0	1	68	1373	1440	1.12e-17	87.8	KAG6408124.1	96	60	60	0	88.24	1	1	TGCAGAGAGTTCAGGGGCCGCAGCTGCTGTTCCTCGATCTCTGCGCTGCGTTTCTTGCTCAGCTTCGT	TGCAGAGAGTTCAGGGGCCGCCGCTGCTCTTCCTTGATCTTTGCGCAGCTTTTCTCGCCCAGCTTCGT	69	1755	KAG6408124.1	5'-AMP-activated protein kinase, catalytic alpha subunit [EC:2.7.11.11]	K07198
2910	KAG6427799.1	91.304	69	6	0	1	69	1378	1446	6.21e-21	98.7	KAG6427799.1	108	63	63	0	91.3	1	1	TGCAGAGATAAGAAGAATGACATGAATATTTTTGCTCACAATTACATGCAAAAGATTGCATATATACAG	TGTAGAGATAAAAAGAATGAGATGAATAATTTTGTTCACAATTACATGCAAAAGATTGCATACATACAG	69	3690	KAG6427799.1	autophagy-related protein 11	K08330
2910	KAG6430843.1	91.304	69	6	0	1	69	1123	1191	6.21e-21	98.7	KAG6430843.1	108	63	63	0	91.3	1	1	TGCAGAGATAAGAAGAATGACATGAATATTTTTGCTCACAATTACATGCAAAAGATTGCATATATACAG	TGTAGAGATAAAAAGAACGAGATGAATAATTTTGTTCACAATTACATGCAAAAGATTGCATATATACAG	69	3444	KAG6430843.1	autophagy-related protein 11	K08330
2924	KAG6411626.1	86.765	68	9	0	1	68	326	259	4.77e-16	83.3	KAG6411626.1	91	59	59	0	86.76	1	-1	TGCAGAGATATATCCTTTTTGACAAGACTCTGGGTCAGTGGGATCTCAGTTGATTCAGATGAGAATGG	TGCAGAGATATATCTTTTTTCACAAGACTCTGGGTTAATGGGATTTCTATCGATTCAGATGAGAAAGG	69	1311	KAG6411626.1	Hypothetical protein	Uncharacterized protein
2927	KAG6409796.1	86.957	69	9	0	1	69	1173	1241	1.37e-16	85.1	KAG6409796.1	93	60	60	0	86.96	1	1	TGCAGAGATATTGTCCTCTGTCATCCTCTCCACTGTTTTTTCTTTGTACTCCACGGCTTTCATTGGGCG	TGCAGAGATATTGAGCTCTGTGATCCTCTCCACACTGTTTTCATTGTATTCAACGGCTTTCATTGGGCG	69	1614	KAG6409796.1	Hypothetical protein	Uncharacterized protein
2927	KAG6387792.1	85.507	69	10	0	1	69	1113	1181	1.67e-15	80.6	KAG6387792.1	88	59	59	0	85.51	1	1	TGCAGAGATATTGTCCTCTGTCATCCTCTCCACTGTTTTTTCTTTGTACTCCACGGCTTTCATTGGGCG	TGCAGAGATACTGAGCTCTGTGATCCTCTCCACACTGTTTTCATTGTATTCAACGGCTTTCATTGGGCG	69	1554	KAG6387792.1	Hypothetical protein	Uncharacterized protein
2934	KAG6410932.1	91.837	49	4	0	2	50	6901	6949	8.63e-13	71.6	KAG6410932.1	78	45	45	0	91.84	1	1	GCAGAGATCATACAAGCTGCTAGAAAAGGAACCAATCAAGGAGGTTTTA	GCAGAGATCATACAAGCTGCTAGAAGAGGATCCAATCAAGGAGCCTTTA	69	8235	KAG6410932.1	serine/threonine-protein kinase ATR [EC:2.7.11.1]	K06640
2934	KAG6413546.1	91.837	49	4	0	2	50	6517	6565	8.63e-13	71.6	KAG6413546.1	78	45	45	0	91.84	1	1	GCAGAGATCATACAAGCTGCTAGAAAAGGAACCAATCAAGGAGGTTTTA	GCAGAGATCATACAAGCTGCTAGAAGAGGATCCAATCAAGGAGCCTTTA	69	7851	KAG6413546.1	serine/threonine-protein kinase ATR [EC:2.7.11.1]	K06640
2943	KAG6408067.1	86.441	59	8	0	1	59	1016	958	8.63e-13	71.6	KAG6408067.1	78	51	51	0	86.44	1	-1	TGCAGAGATGAAAACCATGGAGGAACATTTGTTGCATCAAATGAGTTGTTACTCATGTC	TGCAGAGATGAGAACCATGGTGGAACATCTGTTGCTTCAAAAGAGTTATTGCTCAAGTC	69	2928	KAG6408067.1	Hypothetical protein	Uncharacterized protein
2943	KAG6408645.1	85	60	9	0	1	60	941	882	1.05e-11	68.9	KAG6408645.1	75	51	51	0	85	1	-1	TGCAGAGATGAAAACCATGGAGGAACATTTGTTGCATCAAATGAGTTGTTACTCATGTCA	TGCAGAGATGAAAACCACGGAGGCACATCAGTTGCATCGAACGAGTTATTGCTCAGGTCA	69	2730	KAG6408645.1	Hypothetical protein	Uncharacterized protein
2951	KAG6396259.1	91.837	49	4	0	21	69	505	457	8.63e-13	71.6	KAG6396259.1	78	45	45	0	91.84	1	-1	CCTGGTGAGTGATTGGCCGGAAGCCAGTACTGTAAGCTCCACTTGGACT	CCTGGTGAGTGATTGGCCGGAAACCAGTACTATAAGCTCCGTTTGGACT	69	669	KAG6396259.1	Hypothetical protein	Uncharacterized protein
2951	KAG6398543.1	91.837	49	4	0	21	69	538	490	8.63e-13	71.6	KAG6398543.1	78	45	45	0	91.84	1	-1	CCTGGTGAGTGATTGGCCGGAAGCCAGTACTGTAAGCTCCACTTGGACT	CCTGGTGAGTGATTGGCCGGAAACCAGTACTATAAGCTCCGTTTGGACT	69	843	KAG6398543.1	NAD+-dependent protein deacetylase sirtuin 4 [EC:2.3.1.286]	K11414
2954	KAG6385139.1	86.111	72	7	1	1	69	1593	1664	1.37e-16	84.2	KAG6385139.1	92	62	62	3	86.11	1	1	TGCAGAGATGCCGTGGAGGGC---CCCAGACATTGCACCTGAGAATTACATGATGAATATGGGCCCTTCCGC	TGCAGAGATGCAGTGGCGGGCTGGCCCAGACCTTGTTCCTGAGAATTACATGATGAATATGGGACCTTCTGC	69	2610	KAG6385139.1	E3 ubiquitin-protein ligase RBBP6 [EC:2.3.2.27]	K10624
2954	KAG6382740.1	81.429	70	10	1	3	69	1154	1223	3.67e-11	67.1	KAG6382740.1	73	57	57	3	81.43	1	1	CAGAGATGCCGTGGAGGGC---CCCAGACATTGCACCTGAGAATTACATGATGAATATGGGCCCTTCCGC	CAGAGACGCAGTGGCGAGCTGGCCCAGACCTCGTTCCTGAGAATTACATGATGAATATGGGACCTTCTGC	69	2175	KAG6382740.1	Hypothetical protein	Uncharacterized protein
2954	KAG6425393.1	80.556	72	11	1	1	69	1467	1538	3.67e-11	66.2	KAG6425393.1	72	58	58	3	80.56	1	1	TGCAGAGATGCCGTGG---AGGGCCCCAGACATTGCACCTGAGAATTACATGATGAATATGGGCCCTTCCGC	TGCAGAGATGCAGTGGCAAACTGGTCCAGCCCTTCCTCCTGAGAATTACATGATGAATATGGGTCCTTCTGC	69	2526	KAG6425393.1	E3 ubiquitin-protein ligase RBBP6 [EC:2.3.2.27]	K10624
2955	KAG6401559.1	97.015	67	2	0	1	67	567	633	2.82e-25	113	KAG6401559.1	124	65	65	0	97.01	1	1	TGCAGAGATGCCTGATTTTTACGCTGATGGTGAGTATGATCTGAGCGGTTTTGCTGTTGGCATCGTA	TGCAGAGATGCCTGATTTTTATGCTGATGGTGAGTATGATCTGAGCGGCTTTGCTGTTGGCATCGTA	69	1170	KAG6401559.1	phosphoribosylformylglycinamidine cyclo-ligase [EC:6.3.3.1]	K01933
2955	KAG6403787.1	97.015	67	2	0	1	67	567	633	2.82e-25	113	KAG6403787.1	124	65	65	0	97.01	1	1	TGCAGAGATGCCTGATTTTTACGCTGATGGTGAGTATGATCTGAGCGGTTTTGCTGTTGGCATCGTA	TGCAGAGATGCCTGATTTTTATGCTGATGGTGAGTATGATCTGAGCGGCTTTGCTGTTGGCATCGTA	69	1167	KAG6403787.1	phosphoribosylformylglycinamidine cyclo-ligase [EC:6.3.3.1]	K01933
2961	KAG6408882.1	82.353	68	12	0	2	69	253	320	3.01e-12	69.8	KAG6408882.1	76	56	56	0	82.35	1	1	GCAGAGATGGAAAAATTGGCGTTGAGGGTGATAGAGCTTCTAGCACTGAGCTTAGGGTTGGAGAGAGA	GCTGAGATGGAAAAATTGGGACACAAGTTGTTAGAGCTCATAGCACTGAGCTTAGGTTTGGAGAGAGA	69	816	KAG6408882.1	Hypothetical protein	Uncharacterized protein
2961	KAG6406532.1	81.159	69	13	0	1	69	486	554	3.67e-11	67.1	KAG6406532.1	73	56	56	0	81.16	1	1	TGCAGAGATGGAAAAATTGGCGTTGAGGGTGATAGAGCTTCTAGCACTGAGCTTAGGGTTGGAGAGAGA	TGCTGAGATGGAAAAACTGGGGCACAAGTTGTTAGAGCTAATAGCATTGAGCTTAGGTTTGGAGAGAGA	69	1050	KAG6406532.1	Hypothetical protein	Uncharacterized protein
2964	KAG6415947.1	85.294	68	10	0	1	68	1608	1675	5.82e-15	78.8	KAG6415947.1	86	58	58	0	85.29	1	1	TGCAGAGATGGATCGGATACTGAGGCCCGGTGGGTACTTATTGGTTCAAGATACTGTGGAGATGCTTA	TGCAGAGATGGATCGTATATTGAGACCCGACGGGTACCTGTTGGTTCAAGACACAGTGGAAATGCTTA	69	1776	KAG6415947.1	Hypothetical protein	Uncharacterized protein
2968	KAG6432676.1	91.304	69	6	0	1	69	826	894	6.21e-21	98.7	KAG6432676.1	108	63	63	0	91.3	1	1	TGCAGAGATGGCAACAGCTTTACATATAACAGCCATATCAACATTGCCGTAGCAGTAGCAATAGATGGT	TGCAGAGATGGCAAGAGCTTTACATATAACAGTCATATCAATGTTGCAGTAGCAGTAGCCATAGATGGT	69	1317	KAG6432676.1	pyruvate dehydrogenase E2 component (dihydrolipoamide acetyltransferase) [EC:2.3.1.12]	K00627
2968	KAG6390305.1	89.855	69	7	0	1	69	937	1005	2.64e-19	94.2	KAG6390305.1	103	62	62	0	89.86	1	1	TGCAGAGATGGCAACAGCTTTACATATAACAGCCATATCAACATTGCCGTAGCAGTAGCAATAGATGGT	TGCAGAGACGGCAAGAGCTTTACGTATAACAGTCATATCAACATTGCAGTAGCAGTAGCCATAGACGGT	69	1389	KAG6390305.1	pyruvate dehydrogenase E2 component (dihydrolipoamide acetyltransferase) [EC:2.3.1.12]	K00627
2968	KAG6435998.1	89.855	69	7	0	1	69	832	900	2.64e-19	94.2	KAG6435998.1	103	62	62	0	89.86	1	1	TGCAGAGATGGCAACAGCTTTACATATAACAGCCATATCAACATTGCCGTAGCAGTAGCAATAGATGGT	TGCAGAGATGGCAAGAGCTTTACATATAACAGTCATATTAATGTTGCAGTAGCAGTAGCCATAGATGGT	69	1317	KAG6435998.1	pyruvate dehydrogenase E2 component (dihydrolipoamide acetyltransferase) [EC:2.3.1.12]	K00627
[truncated: 7,756 more rows]
