# Supplementary material for: Genotyping Analysis by RAD-Seq Reads Is Useful to Assess the Genetic Identity and Relationships of Breeding Lines in Lavender Species Aimed at Managing Plant Variety Protection
Source: Genes (Basel). 2021 Oct 21;12(11):1656. doi: 10.3390/genes12111656 (PMC8621978; doi:10.3390/genes12111656)
Supplement: Supplementary file 1 [file genes-12-01656-s001.zip › Supplementary Table S3.xlsx]

## Sheet: TAB_anth-terp_AA-Ssp-reults
	Supplementary Table S3: Multiple alignments results reporting read ID, S. splendens (GCA_004379255.2) accession number on NCBI database, Flavonoid/Terpenes product, KEGG ID assigned by KASS, amino acid substitution based on the polymorphic SNP in the 15 individuals of Lavandula
	Salvia splendens V2 (GCA_004379255.2)
			FLAVONOIDS
	Read ID	S.sp CDS ID	product	KO-Ids from KAAS	SNP to AA Substitution
	7930	KAG6403399.1	cinnamyl-alcohol dehydrogenase [EC:1.1.1.195]	K00083	Leu -> Trp
		KAG6386750.1
	13322	KAG6408954.1			Arg -> Cys
	795	KAG6417397.1	peroxidase [EC:1.11.1.7]	K00430	Lys -> Arg
		KAG6392501.1
	5487	KAG6403428.1			Thr -> Ile
		KAG6394251.1
	1515	KAG6395555.1	tyrosine aminotransferase [EC:2.6.1.5]	K00815	Asn -> Lys
	1516				Lys -> Arg
	11728	KAG6395439.1	anthranilate synthase component I [EC:4.1.3.27]	K01657	Ser -> Pro
	11729	KAG6393611.1			Asn -> Ser
	11730				Ser -> Ser
	1270	KAG6383281.1	tryptophan synthase alpha chain [EC:4.2.1.20]	K01695	Pro -> Arg
	1271	KAG6403024.1			Gly -> Glu
	15032	KAG6420802.1	tryptophan synthase beta chain [EC:4.2.1.20]	K01696	Gly -> Ala
		KAG6423817.1
	6696	KAG6392655.1	3-dehydroquinate synthase [EC:4.2.3.4]	K01735	Asp -> Tyr
		KAG6394413.1
	1299	KAG6393529.1	phosphoribosylanthranilate isomerase [EC:5.3.1.24]	K01817	Pro -> Ala
		KAG6395367.1
	9011	KAG6435185.1	4-coumarate--CoA ligase [EC:6.2.1.12]	K01904	Gln -> Gln
	9012				Arg -> Gln
	14333	KAG6430879.1	4-coumarate--CoA ligase [EC:6.2.1.12]	K01904	Gly -> Gly
	14334				Arg -> Arg
	7488	KAG6436443.1	beta-glucosidase [EC:3.2.1.21]	K05349	Leu -> Ser
	11456				Ala -> Asp
	7480	KAG6396700.1	arogenate/prephenate dehydratase [EC:4.2.1.91; 4.2.1.51]	K05359	Glu -> Val
		KAG6417935.1
	3421	KAG6386308.1	phenylalanine ammonia-lyase [EC:4.3.1.24]	K10775	Gly -> Val
	7969	KAG6412059.1			Gln -> Arg
	11587	KAG6434018.1			His -> Tyr
		KAG6427421.1
		KAG6430482.1
	10947	KAG6428875.1	anthocyanidin 3-O-glucosyltransferase [EC:2.4.1.115]	K12930	Arg -> Pro
		KAG6382354.1
	11569	KAG6400875.1	shikimate O-hydroxycinnamoyltransferase [EC:2.3.1.133]	K13065	Glu -> Glu
	14519	KAG6421699.1	isoflavone 4'-methoxyisoflavone 2'-hydroxylase [EC:1.14.14.90; 1.14.14.89]	K13260	Asn -> Asn
		KAG6421697.1
	13190	KAG6423171.1	3-dehydroquinate dehydratase shikimate dehydrogenase [EC:4.2.1.10 1.1.1.25]	K13832	Ala -> Ala
	13891				Leu -> Leu
	6706	KAG6397466.1	bifunctional aspartate aminotransferase and glutamate aspartate-prephenate aminotransferase [EC:2.6.1.1; 2.6.1.78; 2.6.1.79]	K15849	Val -> Ala
	10566	KAG6399730.1			Val -> Gly
	9183	KAG6430589.1	caffeoylshikimate esterase [EC:3.1.1.-]	K18368	Pro -> Ser
	10093	KAG6394378.1			Ala -> Ala
		KAG6385903.1
			TERPENES
	Read ID	S.sp CDS ID	product	KO-Ids from KAAS	SNP to AA Substitution
	2113	KAG6400172.1	hydroxymethylglutaryl-CoA reductase (NADPH) [EC:1.1.1.34]	K00021	Ala -> Pro
	13445	KAG6401460.1			Phe -> Val
	13821	KAG6401461.1			Tyr -> Ser
		KAG6401462.1
	13998	KAG6401463.1			Glu -> Val
		KAG6402379.1
	14741	KAG6403689.1			Arg -> Thr
		KAG6403690.1
	15739	KAG6403691.1			Thr -> Ile
		KAG6438234.1
	9946	KAG6401668.1	1-deoxy-D-xylulose-5-phosphate reductoisomerase [EC:1.1.1.267]	K00099	Ala -> Thr
		KAG6386175.1
		KAG6403927.1
	6406	KAG6426406.1	aldehyde dehydrogenase (NAD+) [EC:1.2.1.3]	K00128	Gln -> Pro
	11290	KAG6403942.1			Lys -> Asn
	16152	KAG6412213.1			Val -> Leu
		KAG6386168.1
	111	KAG6430119.1	cytokinin dehydrogenase [EC:1.5.99.12]	K00279	Gly -> Gly
		KAG6427108.1
	3603	KAG6400376.1	squalene monooxygenase [EC:1.14.14.17]	K00511	Undetermined
		KAG6402590.1
	1515	KAG6395555.1	tyrosine aminotransferase [EC:2.6.1.5]	K00815	Asn -> Lys
	1516				Lys -> Arg
	5069	KAG6397147.1	phosphomevalonate kinase [EC:2.7.4.2]	K00938	X -> X
	16201	KAG6436372.1	diphosphomevalonate decarboxylase [EC:4.1.1.33]	K01597	Lys -> Glu
	16202	KAG6417367.1			Gly -> Val
		KAG6414860.1
	7456	KAG6416305.1	hydroxymethylglutaryl-CoA synthase [EC:2.3.3.10]	K01641	Arg -> Leu
	7818	KAG6418848.1			Gly -> Ser
	13637	KAG6431799.1			Tyr -> His
	13638				Pro -> Ser
	7267	KAG6435503.1	1-deoxy-D-xylulose-5-phosphate synthase [EC:2.2.1.7]	K01662	Val -> Val
	8365	KAG6432198.1			Lys -> Arg
	8976				Asp -> Asp
	4578	KAG6384495.1	isopentenyl-diphosphate Delta-isomerase [EC:5.3.3.2]	K01823	Undetermined
	6515	KAG6404725.1
	13525	KAG6416140.1
	9011	KAG6435185.1	4-coumarate--CoA ligase [EC:6.2.1.12]	K01904	Gln -> Gln
	9012				Arg -> Gln
	14333	KAG6430879.1			Gly -> Gly
	14334				Arg -> Arg
	11006	KAG6428791.1	15-cis-phytoene desaturase [EC:1.3.5.5]	K02293	Pro -> Ser
	14152	KAG6404049.1	menaquinone-specific isochorismate synthase [EC:5.4.4.2]	K02552	Undetermined
	14154
	14685
	14687
	15015
	7807	KAG6415409.1	(E)-4-hydroxy-3-methylbut-2-enyl-diphosphate synthase [EC:1.17.7.1; 1.17.7.3]	K03526	Val -> Phe
	11373	KAG6432822.1			Leu -> Val
	11381				Leu -> Ile
	686	KAG6410751.1	4-hydroxy-3-methylbut-2-en-1-yl diphosphate reductase [EC:1.17.7.4]	K03527	Lys -> Glu
	10714	KAG6410735.1			Leu -> Pro
	13487	KAG6405342.1	ent-copalyl diphosphate synthase [EC:5.5.1.13]	K04120	Ala -> Val
	13769				Arg -> Lys
	6276	KAG6392464.1	ent-kaurene synthase [EC:4.2.3.19]	K04121	Pro -> Ala
	7199	KAG6403159.1	ent-kaurene oxidase [EC:1.14.14.86]	K04122	Val -> Met
	13444	KAG6400985.1			Thr -> Ala
	5987	KAG6434513.1	ent-kaurenoic acid monooxygenase [EC:1.14.14.107]	K04123	Pro -> Thr
		KAG6437860.1
	14513	KAG6424438.1	all-trans-nonaprenyl-diphosphate synthase [EC:2.5.1.84; 2.5.1.85]	K05356	Leu -> Phe
		KAG6421419.1
		KAG6385395.1
	9534	KAG6434439.1	STE24 endopeptidase [EC:3.4.24.84]	K06013	Arg -> Gly
		KAG6437590.1
	12560	KAG6437297.1	carotenoid epsilon hydroxylase [EC:1.14.14.158]	K09837	Asn -> Asp
	1426	KAG6387826.1	9-cis-epoxycarotenoid dioxygenase [EC:1.13.11.51]	K09840	Asn -> Ser
		KAG6409765.1
	12154	KAG6408920.1	(+)-abscisic acid 8'-hydroxylase [EC:1.14.14.137]	K09843	Tyr -> Asn
	12155	KAG6406577.1			Arg -> Gln
	6830	KAG6413659.1	cis-zeatin O-glucosyltransferase [EC:2.4.1.215]	K13495	Undetermined
	6838	KAG6427098.1
	7041	KAG6427099.1
		KAG6427097.1
	3211	KAG6385247.1	o-succinylbenzoate---CoA ligase [EC:6.2.1.26]	K14760	Lys -> Arg
	6208	KAG6434381.1	beta-amyrin synthase [EC:5.4.99.39]	K15813	Lys -> Glu
	8386	KAG6437655.1			X -> Arg
	10875				Pro -> Pro
