# Supplementary material for: Genotyping Analysis by RAD-Seq Reads Is Useful to Assess the Genetic Identity and Relationships of Breeding Lines in Lavender Species Aimed at Managing Plant Variety Protection
Source: Genes (Basel). 2021 Oct 21;12(11):1656. doi: 10.3390/genes12111656 (PMC8621978; doi:10.3390/genes12111656)
Supplement: Supplementary file 1 [file genes-12-01656-s001.zip › Supplementary Table S4.xlsx]

## Sheet: Sup-Tab-Anth-Terp_Sind
	Supplementary Table S4: BLASTN results for matching genes involved in the Flavonoids and Terpenes biosynthetic pathways of S. indicum
		Pathway	qaccver	sallseqid	pident	length	qstart	qend	slen	sstart	send	evalue	bitscore	score	mismatch	gapopen	nident	positive	gaps	ppos	qframe	sframe	Protein product
	Sesamum indicum	Flavonoids	3043	NC_026160.1_-_XP_011100449.1	82.609	69	1	69	1431	1164	1232	4.62e-13	71.6	78	12	0	57	57	0	82.61	1	1	anthocyanidin 3-O-glucosyltransferase 2
			3043	NC_026160.1_-_XP_011100453.1	81.159	69	1	69	1431	1164	1232	1.96e-11	67.1	73	13	0	56	56	0	81.16	1	1	anthocyanidin 3-O-glucosyltransferase 2-like
			6706	NC_026153.1_-_XP_011090466.1	86.567	67	2	68	1446	1037	1103	8.92e-16	81.5	89	9	0	58	58	0	86.57	1	1	bifunctional aspartate aminotransferase and glutamate/aspartate-prephenate aminotransferase
			7480	NC_026153.1_-_XP_011089364.1	86.765	68	1	68	1152	330	397	2.56e-16	83.3	91	9	0	59	59	0	86.76	1	1	arogenate dehydratase/prephenate dehydratase 2, chloroplastic
			7480	NC_026153.1_-_XP_011089363.1	86.765	68	1	68	1152	330	397	2.56e-16	83.3	91	9	0	59	59	0	86.76	1	1	arogenate dehydratase/prephenate dehydratase 2, chloroplastic
			7969	NC_026155.1_-_XP_011094662.1	82.609	69	1	69	2136	1732	1800	4.62e-13	71.6	78	12	0	57	57	0	82.61	1	1	phenylalanine ammonia-lyase
			9011	NC_026153.1_-_XP_011089239.2	86.154	65	1	65	1650	773	709	1.09e-14	77.9	85	9	0	56	56	0	86.15	1	-1	LOW QUALITY PROTEIN: 4-coumarate--CoA ligase-like 7
			9012	NC_026153.1_-_XP_011089239.2	86.154	65	1	65	1650	773	709	1.09e-14	77.9	85	9	0	56	56	0	86.15	1	-1	LOW QUALITY PROTEIN: 4-coumarate--CoA ligase-like 7
			9955	NC_026156.1_-_XP_020554052.1	87.692	65	5	69	1095	201	265	2.56e-16	82.4	90	8	0	57	57	0	87.69	1	1	putative anthocyanidin reductase isoform X2
			9955	NC_026156.1_-_XP_011095308.1	87.692	65	5	69	1047	201	265	2.56e-16	82.4	90	8	0	57	57	0	87.69	1	1	putative anthocyanidin reductase isoform X2
			10036	NC_026151.1_-_XP_011084354.1	84.848	66	4	69	2775	456	521	3.79e-14	75.2	82	10	0	56	56	0	84.85	1	1	aminodeoxychorismate synthase, chloroplastic
			10947	NC_026146.1_-_XP_011069886.1	85.294	68	1	68	1371	1099	1166	3.11e-15	78.8	86	10	0	58	58	0	85.29	1	1	anthocyanidin 3-O-glucosyltransferase-like
			11587	NC_026149.1_-_XP_011077338.1	84.058	69	1	69	2139	1738	1670	3.79e-14	76.1	83	11	0	58	58	0	84.06	1	-1	phenylalanine ammonia-lyase
			14152	NC_026147.1_-_XP_020548233.1	87.879	66	3	68	1728	1140	1205	7.32e-17	84.2	92	8	0	58	58	0	87.88	1	1	isochorismate synthase, chloroplastic-like
			14152	NC_026147.1_-_XP_020548234.1	87.879	66	3	68	1728	1140	1205	7.32e-17	84.2	92	8	0	58	58	0	87.88	1	1	isochorismate synthase, chloroplastic-like
			14154	NC_026147.1_-_XP_020548233.1	92.424	66	3	68	1728	1140	1205	1.16e-20	97.8	107	5	0	61	61	0	92.42	1	1	isochorismate synthase, chloroplastic-like
			14154	NC_026147.1_-_XP_020548234.1	92.424	66	3	68	1728	1140	1205	1.16e-20	97.8	107	5	0	61	61	0	92.42	1	1	isochorismate synthase, chloroplastic-like
			14685	NC_026147.1_-_XP_020548233.1	89.706	68	1	68	1728	1373	1306	4.93e-19	92.4	101	7	0	61	61	0	89.71	1	-1	isochorismate synthase, chloroplastic-like
			14685	NC_026147.1_-_XP_020548234.1	89.706	68	1	68	1728	1373	1306	4.93e-19	92.4	101	7	0	61	61	0	89.71	1	-1	isochorismate synthase, chloroplastic-like
			14687	NC_026147.1_-_XP_020548233.1	89.855	69	1	69	1728	1373	1305	1.41e-19	94.2	103	7	0	62	62	0	89.86	1	-1	isochorismate synthase, chloroplastic-like
			14687	NC_026147.1_-_XP_020548234.1	89.855	69	1	69	1728	1373	1305	1.41e-19	94.2	103	7	0	62	62	0	89.86	1	-1	isochorismate synthase, chloroplastic-like
			15015	NC_026147.1_-_XP_020548233.1	83.333	66	3	68	1728	1663	1728	1.61e-12	70.7	77	11	0	55	55	0	83.33	1	1	isochorismate synthase, chloroplastic-like
			15015	NC_026147.1_-_XP_020548234.1	83.333	66	3	68	1728	1663	1728	1.61e-12	70.7	77	11	0	55	55	0	83.33	1	1	isochorismate synthase, chloroplastic-like
		Terpenes	8036	NC_026146.1_-_XP_011071094.1	86.957	69	1	69	1014	406	474	7.32e-17	85.1	93	9	0	60	60	0	86.96	1	1	1,4-dihydroxy-2-naphthoyl-CoA synthase, peroxisomal
			14576	NC_026156.1_-_XP_011096130.1	83.077	65	1	65	1617	924	860	5.63e-12	68.9	75	11	0	54	54	0	83.08	1	-1	alpha-farnesene synthase
			6208	NC_026145.1_-_XP_011093795.1	88.235	68	1	68	2292	598	665	6.01e-18	87.8	96	8	0	60	60	0	88.24	1	1	beta-amyrin synthase
			8386	NC_026145.1_-_XP_011093795.1	86.957	69	1	69	2292	1884	1816	7.32e-17	85.1	93	9	0	60	60	0	86.96	1	-1	beta-amyrin synthase
			6208	NC_026152.1_-_XP_011085901.1	88.235	68	1	68	2292	598	665	6.01e-18	87.8	96	8	0	60	60	0	88.24	1	1	beta-amyrin synthase-like
			8386	NC_026152.1_-_XP_011085901.1	85.507	69	1	69	2292	1884	1816	8.92e-16	80.6	88	10	0	59	59	0	85.51	1	-1	beta-amyrin synthase-like
			6276	NC_026156.1_-_XP_011095756.1	85.965	57	1	57	2370	1545	1601	5.63e-12	68	74	8	0	49	49	0	85.96	1	1	ent-kaur-16-ene synthase, chloroplastic
			7199	NC_026151.1_-_XP_011083784.1	83.871	62	8	69	1536	980	919	5.63e-12	68	74	10	0	52	52	0	83.87	1	-1	ent-kaurene oxidase, chloroplastic-like
			3576	NC_026150.1_-_XP_020550121.1	89.831	59	1	59	2118	1786	1728	8.92e-16	80.6	88	6	0	53	53	0	89.83	1	-1	geranylgeranyl transferase type-2 subunit alpha 1
			3576	NC_026150.1_-_XP_011080035.1	89.831	59	1	59	2118	1786	1728	8.92e-16	80.6	88	6	0	53	53	0	89.83	1	-1	geranylgeranyl transferase type-2 subunit alpha 1
			10802	NC_026145.1_-_XP_011092247.1	83.824	68	2	69	987	96	29	1.32e-13	74.3	81	11	0	57	57	0	83.82	1	-1	gibberellin 20-oxidase-like protein
			11279	NC_026156.1_-_XP_011096560.1	81.159	69	1	69	1011	758	690	1.96e-11	67.1	73	13	0	56	56	0	81.16	1	-1	gibberellin 2-beta-dioxygenase
			10014	NC_026159.1_-_XP_011098626.1	84.058	69	1	69	321	217	285	3.79e-14	76.1	83	11	0	58	58	0	84.06	1	1	gibberellin-regulated protein 4-like
			10014	NC_026147.1_-_XP_011071640.1	81.159	69	1	69	318	214	282	1.96e-11	67.1	73	13	0	56	56	0	81.16	1	1	gibberellin-regulated protein 4-like
			4578	NC_026151.1_-_XP_011084658.1	85.965	57	6	62	878	236	292	5.63e-12	68	74	8	0	49	49	0	85.96	1	1	isopentenyl-diphosphate Delta-isomerase I
			6515	NC_026151.1_-_XP_011084658.1	86.441	59	1	59	878	438	380	4.62e-13	71.6	78	8	0	51	51	0	86.44	1	-1	isopentenyl-diphosphate Delta-isomerase I
			13525	NC_026151.1_-_XP_011084658.1	92.453	53	1	53	878	435	487	3.11e-15	78.8	86	4	0	49	49	0	92.45	1	1	isopentenyl-diphosphate Delta-isomerase I
			13525	NC_026148.1_-_XP_011077171.1	88.679	53	1	53	876	436	488	1.61e-12	69.8	76	6	0	47	47	0	88.68	1	1	isopentenyl-diphosphate Delta-isomerase I
			9817	NC_026145.1_-_XP_011075409.1	84.375	64	1	64	513	384	447	4.62e-13	71.6	78	10	0	54	54	0	84.38	1	1	probable NAD(P)H dehydrogenase subunit CRR3, chloroplastic
			14513	NC_026150.1_-_XP_011082816.1	82.609	69	1	69	1266	468	400	4.62e-13	71.6	78	12	0	57	57	0	82.61	1	-1	probable solanesyl-diphosphate synthase 3, chloroplastic
			14513	NC_026158.1_-_XP_011098150.1	81.159	69	1	69	1266	468	400	1.96e-11	67.1	73	13	0	56	56	0	81.16	1	-1	probable solanesyl-diphosphate synthase 3, chloroplastic isoform X2
			5640	NC_026151.1_-_XP_020551000.1	90.741	54	16	69	1314	1033	980	3.79e-14	76.1	83	5	0	49	49	0	90.74	1	-1	protein prenyltransferase alpha subunit repeat-containing protein 1 isoform X6
			5640	NC_026151.1_-_XP_020551002.1	90.741	54	16	69	1314	1033	980	3.79e-14	76.1	83	5	0	49	49	0	90.74	1	-1	protein prenyltransferase alpha subunit repeat-containing protein 1 isoform X6
			3603	NC_026149.1_-_XP_011078470.1	85.938	64	6	69	1578	1474	1537	3.79e-14	76.1	83	9	0	55	55	0	85.94	1	1	squalene monooxygenase
			9296	NC_026154.1_-_XP_011092466.1	84.746	59	11	69	1584	1197	1139	1.96e-11	67.1	73	9	0	50	50	0	84.75	1	-1	squalene monooxygenase-like
			5280	NC_026154.1_-_XP_011092839.1	82.609	69	1	69	1245	1102	1034	4.62e-13	71.6	78	12	0	57	57	0	82.61	1	-1	squalene synthase
			5280	NC_026154.1_-_XP_011092841.1	82.609	69	1	69	1245	1102	1034	4.62e-13	71.6	78	12	0	57	57	0	82.61	1	-1	squalene synthase
			4990	NC_026150.1_-_XP_011082248.1	89.583	48	16	63	1683	101	54	6.86e-11	65.3	71	5	0	43	43	0	89.58	1	-1	vetispiradiene synthase 3 isoform X2
