# Supplementary material for: Genotyping Analysis by RAD-Seq Reads Is Useful to Assess the Genetic Identity and Relationships of Breeding Lines in Lavender Species Aimed at Managing Plant Variety Protection
Source: Genes (Basel). 2021 Oct 21;12(11):1656. doi: 10.3390/genes12111656 (PMC8621978; doi:10.3390/genes12111656)
Supplement: Supplementary file 1 [file genes-12-01656-s001.zip › Supplementary Table S5.xlsx]

## Sheet: Sup-Tab-Anth-Terp_SspV2
	Supplementary Table S5: BLASTN results for Lavandula reads matching genes involved in the Flavonoids and Terpenes biosynthetic pathways of S. splendens
			qaccver	sallseqid	pident	length	qstart	qend	slen	sstart	send	evalue	bitscore	score	mismatch	gapopen	nident	positive	gaps	ppos	qframe	sframe	Protein product
	Salvia splendens V2	Flavonoids	7930	KAG6403399.1	92.308	52	1	52	1068	756	705	2.03e-14	77	84	4	0	48	48	0	92.31	1	-1	cinnamyl-alcohol dehydrogenase [EC:1.1.1.195]
			7930	KAG6386750.1	92.157	51	1	51	1068	756	706	7.08e-14	75.2	82	4	0	47	47	0	92.16	1	-1	cinnamyl-alcohol dehydrogenase [EC:1.1.1.195]
			13322	KAG6408954.1	85.507	69	1	69	1128	397	329	1.67e-15	80.6	88	10	0	59	59	0	85.51	1	-1	cinnamyl-alcohol dehydrogenase [EC:1.1.1.195]
			13322	KAG6424948.1	82.609	69	1	69	1020	279	211	8.63e-13	71.6	78	12	0	57	57	0	82.61	1	-1	cinnamyl-alcohol dehydrogenase [EC:1.1.1.195]
			795	KAG6417397.1	84.375	64	1	64	954	773	710	8.63e-13	71.6	78	10	0	54	54	0	84.38	1	-1	peroxidase [EC:1.11.1.7]
			5487	KAG6392501.1	85.484	62	6	67	987	612	673	8.63e-13	72.5	79	9	0	53	53	0	85.48	1	1	peroxidase [EC:1.11.1.7]
			5487	KAG6403428.1	83.824	68	1	66	969	598	663	1.05e-11	68.9	75	7	2	57	57	4	83.82	1	1	peroxidase [EC:1.11.1.7]
			5487	KAG6394251.1	82.812	64	6	69	987	612	675	3.67e-11	67.1	73	11	0	53	53	0	82.81	1	1	peroxidase [EC:1.11.1.7]
			1515	KAG6395555.1	85.246	61	7	67	1197	129	69	3.01e-12	70.7	77	9	0	52	52	0	85.25	1	-1	tyrosine aminotransferase [EC:2.6.1.5]
			1516	KAG6395555.1	85.246	61	7	67	1197	129	69	3.01e-12	70.7	77	9	0	52	52	0	85.25	1	-1	tyrosine aminotransferase [EC:2.6.1.5]
			11728	KAG6395439.1	89.855	69	1	69	1884	1076	1008	2.64e-19	94.2	103	7	0	62	62	0	89.86	1	-1	anthranilate synthase component I [EC:4.1.3.27]
			11728	KAG6393611.1	88.406	69	1	69	1872	1064	996	3.22e-18	89.7	98	8	0	61	61	0	88.41	1	-1	anthranilate synthase component I [EC:4.1.3.27]
			11729	KAG6395439.1	89.855	69	1	69	1884	1076	1008	2.64e-19	94.2	103	7	0	62	62	0	89.86	1	-1	anthranilate synthase component I [EC:4.1.3.27]
			11729	KAG6393611.1	88.406	69	1	69	1872	1064	996	3.22e-18	89.7	98	8	0	61	61	0	88.41	1	-1	anthranilate synthase component I [EC:4.1.3.27]
			11730	KAG6395439.1	89.855	69	1	69	1884	1076	1008	2.64e-19	94.2	103	7	0	62	62	0	89.86	1	-1	anthranilate synthase component I [EC:4.1.3.27]
			11730	KAG6393611.1	88.406	69	1	69	1872	1064	996	3.22e-18	89.7	98	8	0	61	61	0	88.41	1	-1	anthranilate synthase component I [EC:4.1.3.27]
			1270	KAG6383281.1	85.507	69	1	69	1056	357	425	1.67e-15	80.6	88	10	0	59	59	0	85.51	1	1	tryptophan synthase alpha chain [EC:4.2.1.20]
			1270	KAG6403024.1	85.507	69	1	69	1056	357	425	1.67e-15	80.6	88	10	0	59	59	0	85.51	1	1	tryptophan synthase alpha chain [EC:4.2.1.20]
			1271	KAG6383281.1	85.507	69	1	69	1056	357	425	1.67e-15	80.6	88	10	0	59	59	0	85.51	1	1	tryptophan synthase alpha chain [EC:4.2.1.20]
			1271	KAG6403024.1	85.507	69	1	69	1056	357	425	1.67e-15	80.6	88	10	0	59	59	0	85.51	1	1	tryptophan synthase alpha chain [EC:4.2.1.20]
			15032	KAG6420802.1	82.609	69	1	69	1392	1339	1271	8.63e-13	71.6	78	12	0	57	57	0	82.61	1	-1	tryptophan synthase beta chain [EC:4.2.1.20]
			15032	KAG6423817.1	81.159	69	1	69	1410	1357	1289	3.67e-11	67.1	73	13	0	56	56	0	81.16	1	-1	tryptophan synthase beta chain [EC:4.2.1.20]
			6696	KAG6392655.1	91.176	68	1	68	1365	618	551	2.17e-20	96.9	106	6	0	62	62	0	91.18	1	-1	3-dehydroquinate synthase [EC:4.2.3.4]
			6696	KAG6394413.1	88.235	68	1	68	1374	627	560	1.12e-17	87.8	96	8	0	60	60	0	88.24	1	-1	3-dehydroquinate synthase [EC:4.2.3.4]
			1299	KAG6393529.1	94.118	68	2	69	780	199	266	4.18e-23	105	116	4	0	64	64	0	94.12	1	1	phosphoribosylanthranilate isomerase [EC:5.3.1.24]
			1299	KAG6395367.1	92.647	68	2	69	852	271	338	1.78e-21	101	111	5	0	63	63	0	92.65	1	1	phosphoribosylanthranilate isomerase [EC:5.3.1.24]
			9011	KAG6435185.1	87.879	66	1	66	1638	773	708	1.37e-16	84.2	92	8	0	58	58	0	87.88	1	-1	4-coumarate--CoA ligase [EC:6.2.1.12]
			9012	KAG6435185.1	87.879	66	1	66	1638	773	708	1.37e-16	84.2	92	8	0	58	58	0	87.88	1	-1	4-coumarate--CoA ligase [EC:6.2.1.12]
			14333	KAG6430879.1	81.159	69	1	69	1596	353	285	3.67e-11	67.1	73	13	0	56	56	0	81.16	1	-1	4-coumarate--CoA ligase [EC:6.2.1.12]
			14334	KAG6430879.1	82.609	69	1	69	1596	353	285	8.63e-13	71.6	78	12	0	57	57	0	82.61	1	-1	4-coumarate--CoA ligase [EC:6.2.1.12]
			7488	KAG6436443.1	92.982	57	1	57	1908	264	208	3.92e-17	86	94	4	0	53	53	0	92.98	1	-1	beta-glucosidase [EC:3.2.1.21]
			11456	KAG6436443.1	91.071	56	1	56	1908	632	687	5.82e-15	79.7	87	5	0	51	51	0	91.07	1	1	beta-glucosidase [EC:3.2.1.21]
			7480	KAG6396700.1	88.235	68	1	68	1140	318	385	1.12e-17	87.8	96	8	0	60	60	0	88.24	1	1	arogenate/prephenate dehydratase [EC:4.2.1.91 4.2.1.51]
			7480	KAG6417935.1	88.235	68	1	68	1200	378	445	1.12e-17	87.8	96	8	0	60	60	0	88.24	1	1	arogenate/prephenate dehydratase [EC:4.2.1.91 4.2.1.51]
			3421	KAG6386308.1	88.406	69	1	69	2118	998	930	3.22e-18	89.7	98	8	0	61	61	0	88.41	1	-1	phenylalanine ammonia-lyase [EC:4.3.1.24]
			3421	KAG6412059.1	86.957	69	1	69	2118	998	930	1.37e-16	85.1	93	9	0	60	60	0	86.96	1	-1	phenylalanine ammonia-lyase [EC:4.3.1.24]
			3421	KAG6434018.1	85.507	69	1	69	2115	995	927	1.67e-15	80.6	88	10	0	59	59	0	85.51	1	-1	phenylalanine ammonia-lyase [EC:4.3.1.24]
			7969	KAG6434018.1	86.765	68	1	68	2115	1711	1778	4.77e-16	83.3	91	9	0	59	59	0	86.76	1	1	phenylalanine ammonia-lyase [EC:4.3.1.24]
			7969	KAG6412059.1	85.714	63	6	68	2118	1719	1781	2.47e-13	74.3	81	9	0	54	54	0	85.71	1	1	phenylalanine ammonia-lyase [EC:4.3.1.24]
			7969	KAG6427421.1	83.824	68	1	68	2124	1720	1787	2.47e-13	74.3	81	11	0	57	57	0	83.82	1	1	phenylalanine ammonia-lyase [EC:4.3.1.24]
			11587	KAG6386308.1	89.706	68	2	69	2118	1716	1649	9.22e-19	92.4	101	7	0	61	61	0	89.71	1	-1	phenylalanine ammonia-lyase [EC:4.3.1.24]
			11587	KAG6412059.1	89.706	68	2	69	2118	1716	1649	9.22e-19	92.4	101	7	0	61	61	0	89.71	1	-1	phenylalanine ammonia-lyase [EC:4.3.1.24]
			11587	KAG6430482.1	85.507	69	1	69	2139	1738	1670	1.67e-15	80.6	88	10	0	59	59	0	85.51	1	-1	phenylalanine ammonia-lyase [EC:4.3.1.24]
			10947	KAG6428875.1	86.765	68	1	68	1344	1084	1151	4.77e-16	83.3	91	9	0	59	59	0	86.76	1	1	anthocyanidin 3-O-glucosyltransferase [EC:2.4.1.115]
			10947	KAG6382354.1	91.228	57	1	57	1200	1084	1140	1.67e-15	81.5	89	5	0	52	52	0	91.23	1	1	anthocyanidin 3-O-glucosyltransferase [EC:2.4.1.115]
			11569	KAG6400875.1	87.5	56	12	67	1272	1131	1076	3.01e-12	70.7	77	7	0	49	49	0	87.5	1	-1	shikimate O-hydroxycinnamoyltransferase [EC:2.3.1.133]
			14519	KAG6421699.1	88.406	69	1	69	1473	662	730	3.22e-18	89.7	98	8	0	61	61	0	88.41	1	1	isoflavone/4'-methoxyisoflavone 2'-hydroxylase [EC:1.14.14.90 1.14.14.89]
			14519	KAG6421697.1	86.957	69	1	69	1473	662	730	1.37e-16	85.1	93	9	0	60	60	0	86.96	1	1	isoflavone/4'-methoxyisoflavone 2'-hydroxylase [EC:1.14.14.90 1.14.14.89]
			13190	KAG6423171.1	84.058	69	1	69	1545	1209	1277	7.08e-14	76.1	83	11	0	58	58	0	84.06	1	1	3-dehydroquinate dehydratase / shikimate dehydrogenase [EC:4.2.1.10 1.1.1.25]
			13891	KAG6423171.1	93.443	61	3	63	1545	247	307	2.64e-19	93.3	102	4	0	57	57	0	93.44	1	1	3-dehydroquinate dehydratase / shikimate dehydrogenase [EC:4.2.1.10 1.1.1.25]
			6706	KAG6397466.1	91.045	67	2	68	2625	2216	2282	7.56e-20	95.1	104	6	0	61	61	0	91.04	1	1	bifunctional aspartate aminotransferase and glutamate/aspartate-prephenate aminotransferase [EC:2.6.1.1 2.6.1.78 2.6.1.79]
			6706	KAG6399730.1	88.06	67	2	68	3051	2642	2708	3.92e-17	86	94	8	0	59	59	0	88.06	1	1	bifunctional aspartate aminotransferase and glutamate/aspartate-prephenate aminotransferase [EC:2.6.1.1 2.6.1.78 2.6.1.79]
			10566	KAG6399730.1	91.045	67	1	67	3051	272	338	7.56e-20	95.1	104	6	0	61	61	0	91.04	1	1	bifunctional aspartate aminotransferase and glutamate/aspartate-prephenate aminotransferase [EC:2.6.1.1 2.6.1.78 2.6.1.79]
			10566	KAG6397466.1	88.06	67	1	67	2625	134	200	3.92e-17	86	94	8	0	59	59	0	88.06	1	1	bifunctional aspartate aminotransferase and glutamate/aspartate-prephenate aminotransferase [EC:2.6.1.1 2.6.1.78 2.6.1.79]
			9183	KAG6430589.1	84.127	63	7	69	960	85	147	3.01e-12	69.8	76	10	0	53	53	0	84.13	1	1	caffeoylshikimate esterase [EC:3.1.1.-]
			10093	KAG6394378.1	87.692	65	5	69	1260	442	506	4.77e-16	82.4	90	8	0	57	57	0	87.69	1	1	caffeoylshikimate esterase [EC:3.1.1.-]
			10093	KAG6385903.1	86.154	65	5	69	1062	373	437	2.03e-14	77.9	85	9	0	56	56	0	86.15	1	1	caffeoylshikimate esterase [EC:3.1.1.-]
		Terpenes	2113	KAG6403690.1	86.957	69	1	69	1698	1332	1264	1.37e-16	85.1	93	9	0	60	60	0	86.96	1	-1	hydroxymethylglutaryl-CoA reductase (NADPH) [EC:1.1.1.34]
			2113	KAG6403691.1	86.957	69	1	69	1698	1332	1264	1.37e-16	85.1	93	9	0	60	60	0	86.96	1	-1	hydroxymethylglutaryl-CoA reductase (NADPH) [EC:1.1.1.34]
			2113	KAG6403689.1	86.957	69	1	69	1698	1332	1264	1.37e-16	85.1	93	9	0	60	60	0	86.96	1	-1	hydroxymethylglutaryl-CoA reductase (NADPH) [EC:1.1.1.34]
			13445	KAG6401463.1	86.364	66	2	67	1674	501	436	5.82e-15	79.7	87	9	0	57	57	0	86.36	1	-1	hydroxymethylglutaryl-CoA reductase (NADPH) [EC:1.1.1.34]
			13445	KAG6401462.1	86.364	66	2	67	1674	501	436	5.82e-15	79.7	87	9	0	57	57	0	86.36	1	-1	hydroxymethylglutaryl-CoA reductase (NADPH) [EC:1.1.1.34]
			13445	KAG6401461.1	84.848	66	2	67	1683	510	445	7.08e-14	75.2	82	10	0	56	56	0	84.85	1	-1	hydroxymethylglutaryl-CoA reductase (NADPH) [EC:1.1.1.34]
			13821	KAG6401461.1	89.855	69	1	69	1683	1314	1382	2.64e-19	94.2	103	7	0	62	62	0	89.86	1	1	hydroxymethylglutaryl-CoA reductase (NADPH) [EC:1.1.1.34]
			13821	KAG6401460.1	89.855	69	1	69	1683	1314	1382	2.64e-19	94.2	103	7	0	62	62	0	89.86	1	1	hydroxymethylglutaryl-CoA reductase (NADPH) [EC:1.1.1.34]
			13821	KAG6401463.1	89.855	69	1	69	1674	1305	1373	2.64e-19	94.2	103	7	0	62	62	0	89.86	1	1	hydroxymethylglutaryl-CoA reductase (NADPH) [EC:1.1.1.34]
			13998	KAG6403690.1	89.855	69	1	69	1698	1329	1397	2.64e-19	94.2	103	7	0	62	62	0	89.86	1	1	hydroxymethylglutaryl-CoA reductase (NADPH) [EC:1.1.1.34]
			13998	KAG6403691.1	89.855	69	1	69	1698	1329	1397	2.64e-19	94.2	103	7	0	62	62	0	89.86	1	1	hydroxymethylglutaryl-CoA reductase (NADPH) [EC:1.1.1.34]
			13998	KAG6403689.1	89.855	69	1	69	1698	1329	1397	2.64e-19	94.2	103	7	0	62	62	0	89.86	1	1	hydroxymethylglutaryl-CoA reductase (NADPH) [EC:1.1.1.34]
			14741	KAG6402379.1	91.304	69	1	69	1632	1263	1331	6.21e-21	98.7	108	6	0	63	63	0	91.3	1	1	hydroxymethylglutaryl-CoA reductase (NADPH) [EC:1.1.1.34]
			14741	KAG6400172.1	89.855	69	1	69	1737	1368	1436	2.64e-19	94.2	103	7	0	62	62	0	89.86	1	1	hydroxymethylglutaryl-CoA reductase (NADPH) [EC:1.1.1.34]
			14741	KAG6438234.1	89.855	69	1	69	1653	1284	1352	2.64e-19	94.2	103	7	0	62	62	0	89.86	1	1	hydroxymethylglutaryl-CoA reductase (NADPH) [EC:1.1.1.34]
			15739	KAG6401461.1	88.406	69	1	69	1683	1314	1382	3.22e-18	89.7	98	8	0	61	61	0	88.41	1	1	hydroxymethylglutaryl-CoA reductase (NADPH) [EC:1.1.1.34]
			15739	KAG6401460.1	88.406	69	1	69	1683	1314	1382	3.22e-18	89.7	98	8	0	61	61	0	88.41	1	1	hydroxymethylglutaryl-CoA reductase (NADPH) [EC:1.1.1.34]
			15739	KAG6401463.1	88.406	69	1	69	1674	1305	1373	3.22e-18	89.7	98	8	0	61	61	0	88.41	1	1	hydroxymethylglutaryl-CoA reductase (NADPH) [EC:1.1.1.34]
			9946	KAG6401668.1	92.754	69	1	69	1449	702	634	5.1e-22	103	113	5	0	64	64	0	92.75	1	-1	1-deoxy-D-xylulose-5-phosphate reductoisomerase [EC:1.1.1.267]
			9946	KAG6386175.1	89.855	69	1	69	1521	678	610	2.64e-19	94.2	103	7	0	62	62	0	89.86	1	-1	1-deoxy-D-xylulose-5-phosphate reductoisomerase [EC:1.1.1.267]
			9946	KAG6403927.1	89.855	69	1	69	1422	675	607	2.64e-19	94.2	103	7	0	62	62	0	89.86	1	-1	1-deoxy-D-xylulose-5-phosphate reductoisomerase [EC:1.1.1.267]
			6406	KAG6426406.1	84.058	69	1	69	1599	105	173	7.08e-14	76.1	83	11	0	58	58	0	84.06	1	1	aldehyde dehydrogenase (NAD+) [EC:1.2.1.3]
			11290	KAG6426406.1	92.063	63	3	65	1599	985	1047	9.22e-19	92.4	101	5	0	58	58	0	92.06	1	1	aldehyde dehydrogenase (NAD+) [EC:1.2.1.3]
			16152	KAG6403942.1	92.754	69	1	69	1599	675	607	5.1e-22	103	113	5	0	64	64	0	92.75	1	-1	aldehyde dehydrogenase (NAD+) [EC:1.2.1.3]
			16152	KAG6412213.1	91.176	68	2	69	1521	617	550	2.17e-20	96.9	106	6	0	62	62	0	91.18	1	-1	aldehyde dehydrogenase (NAD+) [EC:1.2.1.3]
			16152	KAG6386168.1	89.706	68	2	69	1653	728	661	9.22e-19	92.4	101	7	0	61	61	0	89.71	1	-1	aldehyde dehydrogenase (NAD+) [EC:1.2.1.3]
			111	KAG6430119.1	85.507	69	1	69	1689	1603	1535	1.67e-15	80.6	88	10	0	59	59	0	85.51	1	-1	cytokinin dehydrogenase [EC:1.5.99.12]
			111	KAG6427108.1	82.609	69	1	69	1749	1663	1595	8.63e-13	71.6	78	12	0	57	57	0	82.61	1	-1	cytokinin dehydrogenase [EC:1.5.99.12]
			3603	KAG6400376.1	89.062	64	6	69	1623	1519	1582	1.37e-16	85.1	93	7	0	57	57	0	89.06	1	1	squalene monooxygenase [EC:1.14.14.17]
			3603	KAG6402590.1	85.938	64	6	69	1641	1537	1600	7.08e-14	76.1	83	9	0	55	55	0	85.94	1	1	squalene monooxygenase [EC:1.14.14.17]
			1515	KAG6395555.1	85.246	61	7	67	1197	129	69	3.01e-12	70.7	77	9	0	52	52	0	85.25	1	-1	tyrosine aminotransferase [EC:2.6.1.5]
			1516	KAG6395555.1	85.246	61	7	67	1197	129	69	3.01e-12	70.7	77	9	0	52	52	0	85.25	1	-1	tyrosine aminotransferase [EC:2.6.1.5]
			5069	KAG6397147.1	95.522	67	3	69	1650	418	484	1.2e-23	108	119	3	0	64	64	0	95.52	1	1	phosphomevalonate kinase [EC:2.7.4.2]
			16201	KAG6436372.1	91.045	67	1	67	1218	933	867	7.56e-20	95.1	104	6	0	61	61	0	91.04	1	-1	diphosphomevalonate decarboxylase [EC:4.1.1.33]
			16201	KAG6417367.1	89.394	66	1	66	1188	912	847	1.12e-17	88.7	97	7	0	59	59	0	89.39	1	-1	diphosphomevalonate decarboxylase [EC:4.1.1.33]
			16201	KAG6414860.1	87.879	66	1	66	1188	912	847	1.37e-16	84.2	92	8	0	58	58	0	87.88	1	-1	diphosphomevalonate decarboxylase [EC:4.1.1.33]
			16202	KAG6436372.1	91.045	67	1	67	1218	933	867	7.56e-20	95.1	104	6	0	61	61	0	91.04	1	-1	diphosphomevalonate decarboxylase [EC:4.1.1.33]
			16202	KAG6417367.1	89.394	66	1	66	1188	912	847	1.12e-17	88.7	97	7	0	59	59	0	89.39	1	-1	diphosphomevalonate decarboxylase [EC:4.1.1.33]
			16202	KAG6414860.1	87.879	66	1	66	1188	912	847	1.37e-16	84.2	92	8	0	58	58	0	87.88	1	-1	diphosphomevalonate decarboxylase [EC:4.1.1.33]
			7456	KAG6416305.1	94.118	68	2	69	1422	364	431	4.18e-23	105	116	4	0	64	64	0	94.12	1	1	hydroxymethylglutaryl-CoA synthase [EC:2.3.3.10]
			7456	KAG6418848.1	94.118	68	2	69	1422	364	431	4.18e-23	105	116	4	0	64	64	0	94.12	1	1	hydroxymethylglutaryl-CoA synthase [EC:2.3.3.10]
			7456	KAG6431799.1	94.118	68	2	69	1383	364	431	4.18e-23	105	116	4	0	64	64	0	94.12	1	1	hydroxymethylglutaryl-CoA synthase [EC:2.3.3.10]
			7818	KAG6416305.1	91.176	68	2	69	1422	364	431	2.17e-20	96.9	106	6	0	62	62	0	91.18	1	1	hydroxymethylglutaryl-CoA synthase [EC:2.3.3.10]
			7818	KAG6418848.1	91.176	68	2	69	1422	364	431	2.17e-20	96.9	106	6	0	62	62	0	91.18	1	1	hydroxymethylglutaryl-CoA synthase [EC:2.3.3.10]
			7818	KAG6431799.1	91.176	68	2	69	1383	364	431	2.17e-20	96.9	106	6	0	62	62	0	91.18	1	1	hydroxymethylglutaryl-CoA synthase [EC:2.3.3.10]
			13637	KAG6416305.1	92.308	65	1	65	1422	366	302	7.56e-20	96	105	5	0	60	60	0	92.31	1	-1	hydroxymethylglutaryl-CoA synthase [EC:2.3.3.10]
			13637	KAG6418848.1	90.769	65	1	65	1422	366	302	9.22e-19	91.5	100	6	0	59	59	0	90.77	1	-1	hydroxymethylglutaryl-CoA synthase [EC:2.3.3.10]
			13638	KAG6416305.1	89.231	65	1	65	1422	366	302	3.92e-17	86.9	95	7	0	58	58	0	89.23	1	-1	hydroxymethylglutaryl-CoA synthase [EC:2.3.3.10]
			13638	KAG6418848.1	87.692	65	1	65	1422	366	302	4.77e-16	82.4	90	8	0	57	57	0	87.69	1	-1	hydroxymethylglutaryl-CoA synthase [EC:2.3.3.10]
			7267	KAG6435503.1	88.406	69	1	69	2157	1626	1694	3.22e-18	89.7	98	8	0	61	61	0	88.41	1	1	1-deoxy-D-xylulose-5-phosphate synthase [EC:2.2.1.7]
			7267	KAG6432198.1	85.507	69	1	69	2157	1626	1694	1.67e-15	80.6	88	10	0	59	59	0	85.51	1	1	1-deoxy-D-xylulose-5-phosphate synthase [EC:2.2.1.7]
			8365	KAG6432198.1	85.714	63	1	63	2157	1806	1744	2.47e-13	74.3	81	9	0	54	54	0	85.71	1	-1	1-deoxy-D-xylulose-5-phosphate synthase [EC:2.2.1.7]
			8365	KAG6435503.1	85.714	63	1	63	2157	1806	1744	2.47e-13	74.3	81	9	0	54	54	0	85.71	1	-1	1-deoxy-D-xylulose-5-phosphate synthase [EC:2.2.1.7]
			8976	KAG6432198.1	84.058	69	1	69	2157	1803	1871	7.08e-14	76.1	83	11	0	58	58	0	84.06	1	1	1-deoxy-D-xylulose-5-phosphate synthase [EC:2.2.1.7]
			8976	KAG6435503.1	84.058	69	1	69	2157	1803	1871	7.08e-14	76.1	83	11	0	58	58	0	84.06	1	1	1-deoxy-D-xylulose-5-phosphate synthase [EC:2.2.1.7]
			4578	KAG6384495.1	96.552	58	6	63	813	267	324	2.17e-20	96.9	106	2	0	56	56	0	96.55	1	1	isopentenyl-diphosphate Delta-isomerase [EC:5.3.3.2]
			4578	KAG6404725.1	96.552	58	6	63	864	216	273	2.17e-20	96.9	106	2	0	56	56	0	96.55	1	1	isopentenyl-diphosphate Delta-isomerase [EC:5.3.3.2]
			4578	KAG6416140.1	94.828	58	6	63	891	225	282	9.22e-19	92.4	101	3	0	55	55	0	94.83	1	1	isopentenyl-diphosphate Delta-isomerase [EC:5.3.3.2]
			6515	KAG6384495.1	88.136	59	1	59	813	469	411	7.08e-14	76.1	83	7	0	52	52	0	88.14	1	-1	isopentenyl-diphosphate Delta-isomerase [EC:5.3.3.2]
			6515	KAG6404725.1	88.136	59	1	59	864	418	360	7.08e-14	76.1	83	7	0	52	52	0	88.14	1	-1	isopentenyl-diphosphate Delta-isomerase [EC:5.3.3.2]
			13525	KAG6404725.1	96.296	54	1	54	864	415	468	3.22e-18	89.7	98	2	0	52	52	0	96.3	1	1	isopentenyl-diphosphate Delta-isomerase [EC:5.3.3.2]
			13525	KAG6384495.1	94.444	54	1	54	813	466	519	1.37e-16	85.1	93	3	0	51	51	0	94.44	1	1	isopentenyl-diphosphate Delta-isomerase [EC:5.3.3.2]
			13525	KAG6416140.1	92.593	54	1	54	891	424	477	1.67e-15	80.6	88	4	0	50	50	0	92.59	1	1	isopentenyl-diphosphate Delta-isomerase [EC:5.3.3.2]
			9011	KAG6435185.1	87.879	66	1	66	1638	773	708	1.37e-16	84.2	92	8	0	58	58	0	87.88	1	-1	4-coumarate--CoA ligase [EC:6.2.1.12]
			9012	KAG6435185.1	87.879	66	1	66	1638	773	708	1.37e-16	84.2	92	8	0	58	58	0	87.88	1	-1	4-coumarate--CoA ligase [EC:6.2.1.12]
			14333	KAG6430879.1	81.159	69	1	69	1596	353	285	3.67e-11	67.1	73	13	0	56	56	0	81.16	1	-1	4-coumarate--CoA ligase [EC:6.2.1.12]
			14334	KAG6430879.1	82.609	69	1	69	1596	353	285	8.63e-13	71.6	78	12	0	57	57	0	82.61	1	-1	4-coumarate--CoA ligase [EC:6.2.1.12]
			11006	KAG6428791.1	88.679	53	1	53	1725	1365	1313	3.01e-12	69.8	76	6	0	47	47	0	88.68	1	-1	15-cis-phytoene desaturase [EC:1.3.5.5]
			14152	KAG6404049.1	92.754	69	1	69	1641	1081	1149	5.1e-22	103	113	5	0	64	64	0	92.75	1	1	menaquinone-specific isochorismate synthase [EC:5.4.4.2]
			14154	KAG6404049.1	98.551	69	1	69	1641	1081	1149	1.9e-27	121	133	1	0	68	68	0	98.55	1	1	menaquinone-specific isochorismate synthase [EC:5.4.4.2]
			14685	KAG6404049.1	91.304	69	1	69	1641	1286	1218	6.21e-21	98.7	108	6	0	63	63	0	91.3	1	-1	menaquinone-specific isochorismate synthase [EC:5.4.4.2]
			14687	KAG6404049.1	93.651	63	1	63	1641	1286	1224	2.17e-20	96.9	106	4	0	59	59	0	93.65	1	-1	menaquinone-specific isochorismate synthase [EC:5.4.4.2]
			15015	KAG6404049.1	87.879	66	3	68	1641	1576	1641	1.37e-16	84.2	92	8	0	58	58	0	87.88	1	1	menaquinone-specific isochorismate synthase [EC:5.4.4.2]
			7807	KAG6415409.1	85.507	69	1	69	2229	1903	1835	1.67e-15	80.6	88	10	0	59	59	0	85.51	1	-1	(E)-4-hydroxy-3-methylbut-2-enyl-diphosphate synthase [EC:1.17.7.1 1.17.7.3]
			7807	KAG6432822.1	85.965	57	1	57	2187	1888	1832	1.05e-11	68	74	8	0	49	49	0	85.96	1	-1	(E)-4-hydroxy-3-methylbut-2-enyl-diphosphate synthase [EC:1.17.7.1 1.17.7.3]
			11373	KAG6415409.1	89.552	67	1	67	2229	1075	1009	3.22e-18	90.6	99	7	0	60	60	0	89.55	1	-1	(E)-4-hydroxy-3-methylbut-2-enyl-diphosphate synthase [EC:1.17.7.1 1.17.7.3]
			11373	KAG6432822.1	81.818	66	3	68	2187	1037	972	3.67e-11	66.2	72	12	0	54	54	0	81.82	1	-1	(E)-4-hydroxy-3-methylbut-2-enyl-diphosphate synthase [EC:1.17.7.1 1.17.7.3]
			11381	KAG6415409.1	91.045	67	1	67	2229	1075	1009	7.56e-20	95.1	104	6	0	61	61	0	91.04	1	-1	(E)-4-hydroxy-3-methylbut-2-enyl-diphosphate synthase [EC:1.17.7.1 1.17.7.3]
			686	KAG6410751.1	83.333	66	4	69	1485	944	1009	3.01e-12	70.7	77	11	0	55	55	0	83.33	1	1	4-hydroxy-3-methylbut-2-en-1-yl diphosphate reductase [EC:1.17.7.4]
			686	KAG6410735.1	83.333	66	4	69	1485	944	1009	3.01e-12	70.7	77	11	0	55	55	0	83.33	1	1	4-hydroxy-3-methylbut-2-en-1-yl diphosphate reductase [EC:1.17.7.4]
			10714	KAG6410751.1	98.485	66	4	69	1485	869	934	8.08e-26	115	127	1	0	65	65	0	98.48	1	1	4-hydroxy-3-methylbut-2-en-1-yl diphosphate reductase [EC:1.17.7.4]
			10714	KAG6410735.1	98.485	66	4	69	1485	869	934	8.08e-26	115	127	1	0	65	65	0	98.48	1	1	4-hydroxy-3-methylbut-2-en-1-yl diphosphate reductase [EC:1.17.7.4]
			13487	KAG6405342.1	84.058	69	1	69	2184	863	931	7.08e-14	76.1	83	11	0	58	58	0	84.06	1	1	ent-copalyl diphosphate synthase [EC:5.5.1.13]
			13769	KAG6405342.1	85.075	67	1	67	2184	863	929	2.03e-14	77	84	10	0	57	57	0	85.07	1	1	ent-copalyl diphosphate synthase [EC:5.5.1.13]
			6276	KAG6392464.1	88.571	70	1	69	2394	1548	1616	1.37e-16	84.2	92	6	2	62	62	2	88.57	1	1	ent-kaurene synthase [EC:4.2.3.19]
			7199	KAG6403159.1	87.5	56	14	69	1137	593	538	3.01e-12	70.7	77	7	0	49	49	0	87.5	1	-1	ent-kaurene oxidase [EC:1.14.14.86]
			7199	KAG6400985.1	87.037	54	16	69	1554	969	916	3.67e-11	67.1	73	7	0	47	47	0	87.04	1	-1	ent-kaurene oxidase [EC:1.14.14.86]
			13444	KAG6403159.1	84.848	66	4	69	1137	603	538	7.08e-14	75.2	82	10	0	56	56	0	84.85	1	-1	ent-kaurene oxidase [EC:1.14.14.86]
			5987	KAG6434513.1	84.615	65	5	69	1470	430	494	2.47e-13	73.4	80	10	0	55	55	0	84.62	1	1	ent-kaurenoic acid monooxygenase [EC:1.14.14.107]
			5987	KAG6437860.1	84.615	65	5	69	1479	439	503	2.47e-13	73.4	80	10	0	55	55	0	84.62	1	1	ent-kaurenoic acid monooxygenase [EC:1.14.14.107]
			14513	KAG6424438.1	91.304	69	1	69	1218	420	352	6.21e-21	98.7	108	6	0	63	63	0	91.3	1	-1	all-trans-nonaprenyl-diphosphate synthase [EC:2.5.1.84 2.5.1.85]
			14513	KAG6421419.1	89.855	69	1	69	1212	414	346	2.64e-19	94.2	103	7	0	62	62	0	89.86	1	-1	all-trans-nonaprenyl-diphosphate synthase [EC:2.5.1.84 2.5.1.85]
			14513	KAG6385395.1	88.406	69	1	69	1359	516	448	3.22e-18	89.7	98	8	0	61	61	0	88.41	1	-1	all-trans-nonaprenyl-diphosphate synthase [EC:2.5.1.84 2.5.1.85]
			9534	KAG6434439.1	92.537	67	1	67	1275	1157	1091	6.21e-21	99.6	109	5	0	62	62	0	92.54	1	-1	STE24 endopeptidase [EC:3.4.24.84]
			9534	KAG6437590.1	92.424	66	1	66	1275	1157	1092	2.17e-20	97.8	107	5	0	61	61	0	92.42	1	-1	STE24 endopeptidase [EC:3.4.24.84]
			12560	KAG6437297.1	84.615	65	1	65	1698	603	667	2.47e-13	73.4	80	10	0	55	55	0	84.62	1	1	carotenoid epsilon hydroxylase [EC:1.14.14.158]
			1426	KAG6387826.1	84.375	64	1	64	1308	64	1	8.63e-13	71.6	78	10	0	54	54	0	84.38	1	-1	9-cis-epoxycarotenoid dioxygenase [EC:1.13.11.51]
			1426	KAG6409765.1	82.609	69	1	69	1767	520	452	8.63e-13	71.6	78	12	0	57	57	0	82.61	1	-1	9-cis-epoxycarotenoid dioxygenase [EC:1.13.11.51]
			12154	KAG6408920.1	93.939	66	4	69	1437	1327	1392	5.1e-22	102	112	4	0	62	62	0	93.94	1	1	(+)-abscisic acid 8'-hydroxylase [EC:1.14.14.137]
			12154	KAG6406577.1	89.394	66	4	69	1437	1327	1392	1.12e-17	88.7	97	7	0	59	59	0	89.39	1	1	(+)-abscisic acid 8'-hydroxylase [EC:1.14.14.137]
			12155	KAG6408920.1	93.939	66	4	69	1437	1327	1392	5.1e-22	102	112	4	0	62	62	0	93.94	1	1	(+)-abscisic acid 8'-hydroxylase [EC:1.14.14.137]
			12155	KAG6406577.1	89.394	66	4	69	1437	1327	1392	1.12e-17	88.7	97	7	0	59	59	0	89.39	1	1	(+)-abscisic acid 8'-hydroxylase [EC:1.14.14.137]
			6830	KAG6413659.1	83.077	65	1	65	1383	101	37	1.05e-11	68.9	75	11	0	54	54	0	83.08	1	-1	cis-zeatin O-glucosyltransferase [EC:2.4.1.215]
			6838	KAG6427098.1	87.719	57	1	57	1374	83	27	8.63e-13	72.5	79	7	0	50	50	0	87.72	1	-1	cis-zeatin O-glucosyltransferase [EC:2.4.1.215]
			6838	KAG6427099.1	85.965	57	1	57	1365	80	24	1.05e-11	68	74	8	0	49	49	0	85.96	1	-1	cis-zeatin O-glucosyltransferase [EC:2.4.1.215]
			7041	KAG6427099.1	90.476	63	1	63	1365	80	18	1.12e-17	87.8	96	6	0	57	57	0	90.48	1	-1	cis-zeatin O-glucosyltransferase [EC:2.4.1.215]
			7041	KAG6427098.1	88.889	63	1	63	1374	83	21	4.77e-16	83.3	91	7	0	56	56	0	88.89	1	-1	cis-zeatin O-glucosyltransferase [EC:2.4.1.215]
			7041	KAG6427097.1	86.567	67	1	67	1362	71	5	1.67e-15	81.5	89	9	0	58	58	0	86.57	1	-1	cis-zeatin O-glucosyltransferase [EC:2.4.1.215]
			3211	KAG6385247.1	90.566	53	5	57	1656	273	325	2.47e-13	74.3	81	5	0	48	48	0	90.57	1	1	o-succinylbenzoate---CoA ligase [EC:6.2.1.26]
			6208	KAG6434381.1	91.304	69	1	69	2298	598	666	6.21e-21	98.7	108	6	0	63	63	0	91.3	1	1	beta-amyrin synthase [EC:5.4.99.39]
			6208	KAG6437655.1	91.304	69	1	69	2286	598	666	6.21e-21	98.7	108	6	0	63	63	0	91.3	1	1	beta-amyrin synthase [EC:5.4.99.39]
			8386	KAG6434381.1	85.507	69	1	69	2298	1884	1816	1.67e-15	80.6	88	10	0	59	59	0	85.51	1	-1	beta-amyrin synthase [EC:5.4.99.39]
			8386	KAG6437655.1	82.609	69	1	69	2286	1884	1816	8.63e-13	71.6	78	12	0	57	57	0	82.61	1	-1	beta-amyrin synthase [EC:5.4.99.39]
			10875	KAG6434381.1	88.525	61	1	61	2298	601	541	5.82e-15	79.7	87	7	0	54	54	0	88.52	1	-1	beta-amyrin synthase [EC:5.4.99.39]
			10875	KAG6437655.1	86.885	61	1	61	2286	601	541	7.08e-14	75.2	82	8	0	53	53	0	86.89	1	-1	beta-amyrin synthase [EC:5.4.99.39]
